# Supplementary material
Source: PubMed Central journal article supplement (PMC1458975)
Supplement: pnas_0510430103_1.pdf [file pnas_0510430103_1.pdf]

**Table 4. Microarray analysis results, mode of gene action classification, and BLAST annotation for the 1,367 ESTs identified as differentially expressed among genotypes (15% FDR)**

| GenBank accession no. | Overall P value | Significant pattern | Fold change <sup>†</sup> | Sector <sup>‡</sup> | BLAST annotation*                                                                                                                                                                                                                                                                                                                                              | Score | E value |
|-----------------------|-----------------|---------------------|--------------------------|---------------------|----------------------------------------------------------------------------------------------------------------------------------------------------------------------------------------------------------------------------------------------------------------------------------------------------------------------------------------------------------------|-------|---------|
| BM073967              | 1.65E-12        | Mo17<F1<B73         | 9.66                     | 10                  | ns                                                                                                                                                                                                                                                                                                                                                             |       |         |
| CD484534              | 1.19E-10        | Mo17<F1<B73         | 2.39                     | 10                  | >ref XP_450808.1  unknown protein [Oryza sativa (japonica cultivar-group)] dbj BAD25837.1  unknown protein [Oryza sativa (japonica cultivar-group)]                                                                                                                                                                                                            | 172   | 7E-56   |
|                       |                 |                     |                          |                     | >ref NP_563872.1  unknown protein [Arabidopsis thaliana] gb AAM63692.1  unknown [Arabidopsis thaliana] gb AAD39574.1  T10024.14 [Arabidopsis thaliana]                                                                                                                                                                                                         | 179   | 3E-29   |
| DV489965              | 2.07E-10        | B73<F1<Mo17         | 3.47                     | 3                   | >ref XP_474978.1  OSJNBb0015G09.12 [Oryza sativa (japonica cultivar-group)] emb CAE03918.2  OSJNBb0015G09.12 [Oryza sativa (japonica cultivar-group)]                                                                                                                                                                                                          | 226   | 2E-67   |
|                       |                 |                     |                          |                     | emb CAE01956.2  OSJNBb0071D01.2 [Oryza sativa (japonica cultivar-group)]                                                                                                                                                                                                                                                                                       | 224   | 2E-42   |
|                       |                 |                     |                          |                     | >gb ABB55396.1  unknown [Solanum tuberosum]                                                                                                                                                                                                                                                                                                                    | 237   | 6E-36   |
|                       |                 |                     |                          |                     | >dbj BAD46596.1  unknown protein [Oryza sativa (japonica cultivar-group)]                                                                                                                                                                                                                                                                                      |       |         |
|                       |                 |                     |                          |                     | >ref NP_683315.1  unknown protein [Arabidopsis thaliana] gb AAL32926.1  Unknown protein [Arabidopsis thaliana] gb AAN65076.1  Unknown protein [Arabidopsis thaliana]                                                                                                                                                                                           | 233   | 3E-30   |
|                       |                 |                     |                          |                     | >gb AAF79893.1  Contains similarity to pigpen protein from Mus musculus gb AF224264  and contains protein of unknown function DUF78 PF01918 domain. ESTs gb N38077.1  gb BE037702.1  gb AV442191.1  gb AV441368.1  gb Z17998.1  gb AV527266.1  gb AV520794.1  gb A1997847.1  gb AV543000  come from this gene.                                                 |       |         |
|                       |                 |                     |                          |                     | [Arabidopsis thaliana]                                                                                                                                                                                                                                                                                                                                         | 538   | 8E-30   |
| BM074100              | 5.26E-10        | Mo17<F1<B73         | 2.19                     | 10                  | >ref XP_473945.1  OSJNBa0053K19.11 [Oryza sativa (japonica cultivar-group)] emb CAE03503.2  OSJNBa0053K19.11 [Oryza sativa (japonica cultivar-group)]                                                                                                                                                                                                          | 408   | 1E-32   |
|                       |                 |                     |                          |                     | >emb CAA81081.1  T-protein [Solanum tuberosum] sp P54260 GCST_SOLTU Aminomethyltransferase, mitochondrial precursor (Glycine cleavage system T protein) (GCVT)                                                                                                                                                                                                 | 406   | 1E-28   |
|                       |                 |                     |                          |                     | >emb CAA81077.1  T protein [Flaveria pringlei] sp P49363 GCST_FLAPR Aminomethyltransferase, mitochondrial precursor (Glycine cleavage system T protein) (GCVT)                                                                                                                                                                                                 | 407   | 4E-28   |
|                       |                 |                     |                          |                     | >emb CAB16917.1  T-Protein precursor [Flaveria trinervia] sp O23936 GCST_FLATR Aminomethyltransferase, mitochondrial precursor (Glycine cleavage system T protein) (GCVT)                                                                                                                                                                                      | 407   | 4E-28   |
|                       |                 |                     |                          |                     | >emb CAA94902.1  T-protein [Flaveria anomala] sp O49849 GCST_FLAAAN Aminomethyltransferase, mitochondrial precursor (Glycine cleavage system T protein) (GCVT)                                                                                                                                                                                                 | 407   | 4E-28   |
| BM073112              | 1.12E-09        | Mo17<F1<B73         | 5.42                     | 10                  | >ref XP_479601.1  unknown protein [Oryza sativa (japonica cultivar-group)] ref XP_506581.1  PREDICTED OJ1200_C08.123 gene product [Oryza sativa (japonica cultivar-group)] dbj BAD30292.1  unknown protein [Oryza sativa (japonica cultivar-group)] dbj BAC10351.1  unknown protein [Oryza sativa (japonica cultivar-group)]                                   | 247   | 3E-63   |
|                       |                 |                     |                          |                     | >ref XP_472660.1  OSJNBa0086B14.2 [Oryza sativa (japonica cultivar-group)] emb CAD40830.1  OSJNBa0086B14.2 [Oryza sativa (japonica cultivar-group)]                                                                                                                                                                                                            | 245   | 2E-27   |
|                       |                 |                     |                          |                     | >dbj BAB11562.1  unnamed protein product [Arabidopsis thaliana]                                                                                                                                                                                                                                                                                                | 234   | 5E-24   |
|                       |                 |                     |                          |                     | >ref NP_201343.2  unknown protein [Arabidopsis thaliana]                                                                                                                                                                                                                                                                                                       | 252   | 5E-24   |
|                       |                 |                     |                          |                     | >emb CAB79348.1  putative protein [Arabidopsis thaliana] emb CAB45073.1  putative protein [Arabidopsis thaliana]                                                                                                                                                                                                                                               | 208   | 7E-23   |
| BM350737              | 1.83E-09        | Mo17<F1<B73         | 3.88                     | 10                  | ns                                                                                                                                                                                                                                                                                                                                                             |       |         |
| BM073177              | 1.94E-09        | Mo17<B73=F1         | 7.5                      | 10                  | >gb AAT40079.1  MPI [Zea perennis] gb AAT40071.1  MPI [Zea perennis] gb AAT40067.1  MPI [Zea diploperennis]                                                                                                                                                                                                                                                    | 71    | 2E-22   |
|                       |                 |                     |                          |                     | >gb ABA34107.1  maize protease inhibitor [Zea mays subsp. parviglumis]                                                                                                                                                                                                                                                                                         | 70    | 2E-22   |
|                       |                 |                     |                          |                     | >gb ABA34116.1  maize protease inhibitor [Zea mays subsp. parviglumis]                                                                                                                                                                                                                                                                                         | 70    | 2E-22   |
|                       |                 |                     |                          |                     | >gb AAT40086.1  MPI [Zea perennis] gb AAT40083.1  MPI [Zea perennis] gb AAT40082.1  MPI [Zea perennis] gb AAT40081.1  MPI [Zea perennis]                                                                                                                                                                                                                       |       |         |
|                       |                 |                     |                          |                     | gb AAT40080.1  MPI [Zea perennis] gb AAT40078.1  MPI [Zea perennis] gb AAT40075.1  MPI [Zea perennis] gb AAT40074.1  MPI [Zea perennis]                                                                                                                                                                                                                        |       |         |
|                       |                 |                     |                          |                     | gb AAT40073.1  MPI [Zea perennis] gb AAT40072.1  MPI [Zea perennis] gb AAT40070.1  MPI [Zea diploperennis] gb AAT40069.1  MPI [Zea diploperennis]                                                                                                                                                                                                              |       |         |
|                       |                 |                     |                          |                     | gb AAT40068.1  MPI [Zea diploperennis] gb AAT40066.1  MPI [Zea diploperennis] gb AAT40065.1  MPI [Zea diploperennis] gb AAT40064.1  MPI [Zea diploperennis] gb AAT40062.1  MPI [Zea diploperennis] gb AAT40061.1  MPI [Zea diploperennis] gb AAT40060.1  MPI [Zea diploperennis] gb AAT40059.1  MPI [Zea diploperennis] gb AAT40058.1  MPI [Zea diploperennis] | 72    | 3E-22   |
|                       |                 |                     |                          |                     | >gb ABA34112.1  maize protease inhibitor [Zea mays subsp. parviglumis]                                                                                                                                                                                                                                                                                         | 71    | 3E-22   |
| DV490536              | 2.04E-09        | Mo17<F1<B73         | 2.12                     | 10                  | >gb AAX11351.1  cathepsin B-like cysteine protease [Oryza sativa (japonica cultivar-group)]                                                                                                                                                                                                                                                                    | 358   | 3E-75   |
|                       |                 |                     |                          |                     | >emb CAC83720.1  cathepsin B [Hordeum vulgare subsp. vulgare]                                                                                                                                                                                                                                                                                                  | 344   | 3E-74   |
|                       |                 |                     |                          |                     | >emb CAA46810.1  cathepsin B [Triticum aestivum]                                                                                                                                                                                                                                                                                                               | 305   | 2E-73   |
|                       |                 |                     |                          |                     | >emb CAA46811.1  cathepsin B [Triticum aestivum]                                                                                                                                                                                                                                                                                                               | 353   | 5E-68   |
|                       |                 |                     |                          |                     | >dbj BAD94873.1  cathepsin B-like cysteine proteinase like protein [Arabidopsis thaliana]                                                                                                                                                                                                                                                                      | 183   | 5E-63   |
| CD058791              | 3.65E-09        | Mo17<F1<B73         | 1.9                      | 10                  | >ref XP_475712.1  putative GTP-binding protein Rab7a [Oryza sativa (japonica cultivar-group)] gb AAT01314.1  putative GTP-binding protein Rab7a [Oryza sativa (japonica cultivar-group)]                                                                                                                                                                       | 206   | 1E-95   |
|                       |                 |                     |                          |                     | >sp Q40787 RAB7 PENCL Ras-related protein Rab7 (Possible apospory-associated protein) gb AAA85273.1  possible apospory-associated protein                                                                                                                                                                                                                      | 206   | 1E-95   |
|                       |                 |                     |                          |                     | >gb AAO67728.1  small GTP binding protein [Oryza sativa (indica cultivar-group)]                                                                                                                                                                                                                                                                               | 206   | 1E-94   |
|                       |                 |                     |                          |                     | >gb ABB29958.1  unknown [Solanum tuberosum] gb ABB02623.1  unknown [Solanum tuberosum]                                                                                                                                                                                                                                                                         | 206   | 4E-93   |
|                       |                 |                     |                          |                     | >gb AAQ72787.1  putative GTP-binding protein [Cucumis sativus]                                                                                                                                                                                                                                                                                                 | 206   | 6E-93   |
| BM348874              | 3.90E-09        | Mo17<F1<B73         | 2.93                     | 10                  | ns                                                                                                                                                                                                                                                                                                                                                             |       |         |
| CD650745              | 6.08E-09        | Mo17<F1<B73         | 2.5                      | 10                  | >gb AAL76334.1  putative G-box binding protein [Oryza sativa] dbj BAD45657.1  G-box binding protein-like [Oryza sativa (japonica cultivar-group)]                                                                                                                                                                                                              | 89    | 9E-40   |
|                       |                 |                     |                          |                     | gb AAB65433.1  HvB12D homolog [Oryza sativa]                                                                                                                                                                                                                                                                                                                   |       |         |

**Table 4. Microarray analysis results, mode of gene action classification, and BLAST annotation for the 1,367 ESTs identified as differentially expressed among genotypes (15% FDR)**

| GenBank accession no. | Overall P value | Significant pattern | Fold change <sup>†</sup> | Sector <sup>‡</sup> | BLAST annotation*                                                                                                                                                                                                                                                                                                       | Score | E value |
|-----------------------|-----------------|---------------------|--------------------------|---------------------|-------------------------------------------------------------------------------------------------------------------------------------------------------------------------------------------------------------------------------------------------------------------------------------------------------------------------|-------|---------|
|                       |                 |                     |                          |                     | >emb CAA70936.1  B12Dg1 [Hordeum vulgare subsp. vulgare] emb CAA54065.1  HvB12D [Hordeum vulgare subsp. vulgare]                                                                                                                                                                                                        | 87    | 8E-36   |
|                       |                 |                     |                          |                     | >gb AAD22104.1  B12D protein [Ipomoea batatas]                                                                                                                                                                                                                                                                          | 90    | 3E-33   |
|                       |                 |                     |                          |                     | >ref NP_190397.1  unknown protein [Arabidopsis thaliana] emb CAB51061.1  B12D-like protein [Arabidopsis thaliana] gb AAL91215.1  B12D-like protein [Arabidopsis thaliana] gb AAN65070.1  B12D-like protein [Arabidopsis thaliana] pir T13003 hypothetical protein T24C20.20 - Arabidopsis thaliana                      | 88    | 7E-29   |
|                       |                 |                     |                          |                     | >ref XP_477421.1  putative B12D protein [Oryza sativa (japonica cultivar-group)] dbj BAC84633.1  putative B12D protein [Oryza sativa (japonica cultivar-group)] dbj BAD31625.1  putative B12D protein [Oryza sativa (japonica cultivar-group)]                                                                          | 98    | 8E-28   |
| BG842925              | 6.85E-09        | Mo17<F1<B73         | 2.77                     | 10                  | >ref XP_462851.1  B1146F03.16 [Oryza sativa (japonica cultivar-group)] dbj BAB93161.1  putative CP12 [Oryza sativa (japonica cultivar-group)] dbj BAB19776.1  contains EST AU078264(S21150)-unknown protein [Oryza sativa (japonica cultivar-group)]                                                                    | 124   | 3E-31   |
|                       |                 |                     |                          |                     | >emb CAA96570.1  CP12 [Pisum sativum]                                                                                                                                                                                                                                                                                   | 127   | 9E-23   |
|                       |                 |                     |                          |                     | >gb AAV63570.1  auxin-induced putative CP12 domain-containing protein [Arachis hypogaea]                                                                                                                                                                                                                                | 73    | 7E-22   |
|                       |                 |                     |                          |                     | >ref NP_566100.2  CP12-1 [Arabidopsis thaliana] gb AAM47914.1  putative chloroplast protein CP12 [Arabidopsis thaliana] gb AAL32917.1  putative chloroplast protein CP12 [Arabidopsis thaliana]                                                                                                                         | 124   | 1E-21   |
|                       |                 |                     |                          |                     | >emb CAA96568.1  CP12 [Spinacia oleracea]                                                                                                                                                                                                                                                                               | 124   | 1E-20   |
| CD484655              | 8.17E-09        | Mo17<F1<B73         | 1.84                     | 10                  | >ref XP_475712.1  putative GTP-binding protein Rab7a [Oryza sativa (japonica cultivar-group)] gb AAT01314.1  putative GTP-binding protein Rab7a [Oryza sativa (japonica cultivar-group)]                                                                                                                                | 206   | 2E-78   |
|                       |                 |                     |                          |                     | >sp Q40787 RAB7 PENCL Ras-related protein Rab7 (Possible apospory-associated protein) gb AAA85273.1  possible apospory-associated protein                                                                                                                                                                               | 206   | 2E-78   |
|                       |                 |                     |                          |                     | >gb AAO67728.1  small GTP binding protein [Oryza sativa (indica cultivar-group)]                                                                                                                                                                                                                                        | 206   | 5E-77   |
|                       |                 |                     |                          |                     | >sp O24461 RAB7 PRUAR Ras-related protein Rab7 gb AAB71504.1  Rab7 GTP binding protein [Prunus armeniaca]                                                                                                                                                                                                               | 207   | 3E-70   |
|                       |                 |                     |                          |                     | >emb CAA98171.1  RAB7D [Lotus corniculatus var. japonicus]                                                                                                                                                                                                                                                              | 207   | 1E-69   |
| DV942590              | 1.67E-08        | B73<F1=Mo17         | 2.81                     | 2                   | ns                                                                                                                                                                                                                                                                                                                      |       |         |
| BG841472              | 1.74E-08        | B73<F1=Mo17         | 4.66                     | 3                   | >emb CAJ20024.1  putative cystatin [Zea mays] dbj BAA09666.1  cysteine proteinase inhibitor [Zea mays] gb AAY57865.1  cysteine proteinase inhibitor [Zea mays subsp. parviglumis]                                                                                                                                       | 134   | 3E-61   |
|                       |                 |                     |                          |                     | >emb CAA60610.1  cysteine proteinase inhibitor [Zea mays]                                                                                                                                                                                                                                                               | 134   | 7E-61   |
|                       |                 |                     |                          |                     | >gb AAY57868.1  cysteine proteinase inhibitor [Zea mays subsp. parviglumis] gb AAY57864.1  cysteine proteinase inhibitor [Zea mays subsp. parviglumis]                                                                                                                                                                  | 134   | 9E-60   |
|                       |                 |                     |                          |                     | >dbj BAA07327.1  cystatin II [Zea mays]                                                                                                                                                                                                                                                                                 | 134   | 4E-58   |
|                       |                 |                     |                          |                     | >gb AAY57859.1  cysteine proteinase inhibitor [Zea mays subsp. parviglumis]                                                                                                                                                                                                                                             | 134   | 4E-58   |
| BG840972              | 1.81E-08        | Mo17<F1<B73         | 7.03                     | 10                  | ns                                                                                                                                                                                                                                                                                                                      |       |         |
| BM073611              | 2.10E-08        | Mo17<B73=F1         | 22.77                    | 10                  | ns                                                                                                                                                                                                                                                                                                                      |       |         |
| CD661828              | 2.20E-08        | B73<F1<Mo17         | 3.64                     | 3                   | >gb AAP94583.1  putative protein [Zea mays]                                                                                                                                                                                                                                                                             | 786   | 6E-6    |
| CB815723              | 2.43E-08        | B73<F1=Mo17         | 2.99                     | 2                   | >emb CAJ20023.1  putative cystatin [Zea mays]                                                                                                                                                                                                                                                                           | 135   | 5E-46   |
|                       |                 |                     |                          |                     | >sp P31726 CYT1 MAIZE Cystatin-1 precursor (Cystatin I) (Corn kernel cysteine proteinase inhibitor)  dbj BAA01472.1  corn cystatin I [Zea mays]                                                                                                                                                                         | 135   | 2E-45   |
|                       |                 |                     |                          |                     | >emb CAA60634.1  cysteine proteinase inhibitor [Sorghum bicolor]                                                                                                                                                                                                                                                        | 130   | 6E-43   |
|                       |                 |                     |                          |                     | >emb CAJ20024.1  putative cystatin [Zea mays] dbj BAA09666.1  cysteine proteinase inhibitor [Zea mays] gb AAY57865.1  cysteine proteinase inhibitor [Zea mays subsp. parviglumis]                                                                                                                                       | 134   | 6E-43   |
|                       |                 |                     |                          |                     | >emb CAA60610.1  cysteine proteinase inhibitor [Zea mays]                                                                                                                                                                                                                                                               | 134   | 1E-42   |
| CB886241              | 3.18E-08        | Mo17<F1<B73         | 2.33                     | 10                  | >dbj BAD53494.1  putative Synoviolin 1 [Oryza sativa (japonica cultivar-group)] dbj BAD53976.1  putative Synoviolin 1 [Oryza sativa (japonica cultivar-group)]                                                                                                                                                          | 500   | 3E-10   |
|                       |                 |                     |                          |                     | >ref NP_188230.1  protein binding / ubiquitin-protein ligase/ zinc ion binding [Arabidopsis thaliana] gb AAY57599.1  RING finger family protein [Arabidopsis thaliana]  dbj BAB02675.1  unnamed protein product [Arabidopsis thaliana]  dbj BAC41836.1  putative zinc finger protein [Arabidopsis thaliana]             | 492   | 3E-9    |
|                       |                 |                     |                          |                     | >ref NP_849843.3  protein binding / ubiquitin-protein ligase/ zinc ion binding [Arabidopsis thaliana] gb AAR23700.1  At1g65040 [Arabidopsis thaliana]  dbj BAD42325.1  Hrd1p like protein [Arabidopsis thaliana]                                                                                                        | 460   | 9E-9    |
|                       |                 |                     |                          |                     | >gb AAF06038.1  Contains a PF00097 Zinc finger, C3HC4 type (RING finger) domain. ESTs gb N96912 and gb AI994359 come from this gene. [Arabidopsis thaliana]                                                                                                                                                             | 496   | 9E-9    |
|                       |                 |                     |                          |                     | >ref NP_176684.3  protein binding / ubiquitin-protein ligase/ zinc ion binding [Arabidopsis thaliana]                                                                                                                                                                                                                   | 389   | 9E-9    |
| BG874023              | 3.44E-08        | Mo17<F1<B73         | 2.5                      | 10                  | >ref NP_917838.1  putative chloroplast 50S ribosomal protein L31 [Oryza sativa (japonica cultivar-group)]  dbj BAB90423.1  chloroplast 50S ribosomal protein L31-like [Oryza sativa (japonica cultivar-group)]  dbj BAB90722.1  chloroplast 50S ribosomal protein L31-like [Oryza sativa (japonica cultivar-group)]     | 135   | 1E-19   |
| CB605161              | 3.69E-08        | B73<F1<Mo17         | 2.82                     | 3                   | >gb AAC04265.1  (S)-adenosyl-L-methionine:delta 24-sterol methyltransferase [Zeamays]                                                                                                                                                                                                                                   | 344   | 3E-64   |
|                       |                 |                     |                          |                     | >gb AAB70886.1  endosperm C-24 sterol methyltransferase [Zea mays]                                                                                                                                                                                                                                                      | 344   | 3E-64   |
|                       |                 |                     |                          |                     | >ref XP_477078.1  cycloartenol-C24-methyltransferase [Oryza sativa (japonica cultivar-group)]  dbj BAC83238.1  cycloartenol-C24-methyltransferase [Oryza sativa (japonica cultivar-group)]  sp Q6ZIX2 SMT1 ORYSA Cycloartenol-C-24-methyltransferase 1 (24-sterol C-methyltransferase 1) (Sterol C-methyltransferase 1) | 344   | 5E-63   |
|                       |                 |                     |                          |                     | >gb AAC34988.1  cycloartenol-C24-methyltransferase [Oryza sativa subsp. japonica]                                                                                                                                                                                                                                       | 349   | 5E-63   |
|                       |                 |                     |                          |                     | >gb AAC34951.1  S-adenosyl-methionine-sterol-C- methyltransferase [Nicotiana tabacum]                                                                                                                                                                                                                                   | 346   | 1E-60   |
| BM079312              | 4.07E-08        | B73<F1=Mo17         | 2.94                     | 3                   | >ref XP_450323.1  putative indole-3-glycerol phosphate synthase [Oryza sativa (japonica cultivar-group)]  dbj BAD23563.1  putative indole-3-glycerol phosphate synthase [Oryza sativa (japonica cultivar-group)]                                                                                                        | 381   | 2E-35   |

**Table 4. Microarray analysis results, mode of gene action classification, and BLAST annotation for the 1,367 ESTs identified as differentially expressed among genotypes (15% FDR)**

| GenBank accession no. | Overall P value | Significant pattern | Fold change <sup>†</sup> | Sector <sup>‡</sup> | BLAST annotation*                                                                                                                                                                                                                                                                                                                   | Score | E value |
|-----------------------|-----------------|---------------------|--------------------------|---------------------|-------------------------------------------------------------------------------------------------------------------------------------------------------------------------------------------------------------------------------------------------------------------------------------------------------------------------------------|-------|---------|
|                       |                 |                     |                          |                     | >ref XP_481579.1  putative indole-3-glycerol phosphate synthase [Oryza sativa(japonica cultivar-group)] dbj BAD01725.1  putative indole-3-glycerol phosphate synthase [Oryza sativa (japonica cultivar-group)] dbj BAD10429.1  putative indole-3-glycerol phosphate synthase [Oryza sativa (japonica cultivar-group)]               | 399   | 3E-33   |
|                       |                 |                     |                          |                     | >ref XP_472804.1  OSJNBa0016002.9 [Oryza sativa (japonica cultivar-group)]emb CAE05999.3  OSJNBa0016002.9 [Oryza sativa (japonica cultivar-group)]                                                                                                                                                                                  | 393   | 2E-29   |
|                       |                 |                     |                          |                     | >ref NP_199633.1  indole-3-glycerol-phosphate synthase [Arabidopsis thaliana]gb AAL31111.1  AT5g48220/MIF21_11 [Arabidopsis thaliana] gb AAK97693.1  AT5g48220/MIF21_11 [Arabidopsis thaliana] gb AAK91344.1  AT5g48220/MIF21_11 [Arabidopsis thaliana] dbj BAA97002.1  indole-3-glycerol phosphate synthase [Arabidopsis thaliana] | 379   | 1E-27   |
|                       |                 |                     |                          |                     | >dbj BAC42166.1  putative indole-3-glycerol phosphate synthase [Arabidopsisthaliana]                                                                                                                                                                                                                                                | 259   | 5E-26   |
| AF153448              | 5.59E-08        | F1=Mo17<B73         | 2.14                     | 9                   | >gb AAD38068.1  nitrate reductase [Zea mays]                                                                                                                                                                                                                                                                                        | 910   | 0E+0    |
|                       |                 |                     |                          |                     | >sp P17571 NIA1 MAIZE Nitrate reductase [NADH] (NR)                                                                                                                                                                                                                                                                                 | 621   | 0E+0    |
|                       |                 |                     |                          |                     | >gb AAA03202.1  NADH:nitrate reductase                                                                                                                                                                                                                                                                                              | 618   | 0E+0    |
|                       |                 |                     |                          |                     | >gb AAA33483.1  nitrate reductase                                                                                                                                                                                                                                                                                                   | 501   | 0E+0    |
|                       |                 |                     |                          |                     | >pir S19254 nitrate reductase (NADH) (EC 1.7.1.1) flavin chain (clone Zmnr1) -maize (fragment)                                                                                                                                                                                                                                      | 617   | 0E+0    |
| BG840917              | 5.60E-08        | Mo17<F1<B73         | 3.86                     | 10                  | >gb AAC24570.1  trypsin inhibitor [Zea mays]                                                                                                                                                                                                                                                                                        | 174   | 5E-71   |
|                       |                 |                     |                          |                     | >ref XP_549976.1  putative Bowman Birk trypsin inhibitor [Oryza sativa (japonica cultivar-group)] dbj BAD52865.1  putative Bowman Birk trypsin inhibitor [Oryza sativa (japonica cultivar-group)] dbj BAD52690.1  putative Bowman Birk trypsin inhibitor [Oryza sativa (japonica cultivar-group)]                                   | 186   | 6E-32   |
|                       |                 |                     |                          |                     | >emb CAB88393.1  putative Bowman Birk trypsin inhibitor [Oryza sativa (indicacultivar-group)]                                                                                                                                                                                                                                       | 190   | 2E-29   |
|                       |                 |                     |                          |                     | >ref NP_909066.1  putative Bowman Birk trypsin inhibitor [Oryza sativa (japonica cultivar-group)] dbj BAB21176.1  putative Bowman Birk trypsin inhibitor [Oryza sativa (japonica cultivar-group)]                                                                                                                                   | 218   | 3E-29   |
|                       |                 |                     |                          |                     | >emb CAB88391.1  putative Bowman Birk trypsin inhibitor [Oryza sativa (indicacultivar-group)]                                                                                                                                                                                                                                       | 185   | 4E-29   |
| DV490909              | 7.59E-08        | Mo17<F1<B73         | 2.42                     | 10                  | ns                                                                                                                                                                                                                                                                                                                                  |       |         |
| DV490507              | 8.39E-08        | Mo17<F1<B73         | 3.79                     | 10                  | >dbj BAD53494.1  putative Synoviolin 1 [Oryza sativa (japonica cultivar-group)]dbj BAD53976.1  putative Synoviolin 1 [Oryza sativa (japonica cultivar-group)]                                                                                                                                                                       | 500   | 2E-20   |
|                       |                 |                     |                          |                     | >ref NP_188230.1  protein binding / ubiquitin-protein ligase/ zinc ion binding[Arabidopsis thaliana] gb AAY57599.1  RING finger family protein [Arabidopsis thaliana] dbj BAB02675.1  unnamed protein product [Arabidopsis thaliana] dbj BAC41836.1  putative zinc finger protein [Arabidopsis thaliana]                            | 492   | 8E-20   |
|                       |                 |                     |                          |                     | >ref NP_849843.3  protein binding / ubiquitin-protein ligase/ zinc ion binding[Arabidopsis thaliana] gb AAR23700.1  At1g65040 [Arabidopsis thaliana]                                                                                                                                                                                |       |         |
|                       |                 |                     |                          |                     | dbj BAD42325.1  Hrd1p like protein [Arabidopsis thaliana]                                                                                                                                                                                                                                                                           | 460   | 4E-19   |
|                       |                 |                     |                          |                     | >gb AAF06038.1  Contains a PF 00097 Zinc finger, C3HC4 type (RING finger) domain.ESTs gb N96912 and gb AI994359 come from this gene. [Arabidopsis thaliana]                                                                                                                                                                         | 496   | 4E-19   |
|                       |                 |                     |                          |                     | >ref NP_176684.3  protein binding / ubiquitin-protein ligase/ zinc ion binding[Arabidopsis thaliana]                                                                                                                                                                                                                                | 389   | 4E-19   |
| DV490386              | 9.87E-08        | B73<F1<Mo17         | 2.22                     | 4                   | >gb AAO16692.1  putative Xa1-like protein [Sorghum bicolor]                                                                                                                                                                                                                                                                         | 1284  | 1E-83   |
|                       |                 |                     |                          |                     | >emb CAD45028.1  NBS-LRR disease resistance protein homologue [Hordeum vulgare]                                                                                                                                                                                                                                                     | 1366  | 2E-50   |
|                       |                 |                     |                          |                     | >dbj BAD29495.1  putative bacterial blight-resistance protein Xa1 [Oryza sativa(japonica cultivar-group)] dbj BAD28895.1  putative bacterial blight-resistance protein Xa1 [Oryza sativa (japonica cultivar-group)]                                                                                                                 | 1394  | 3E-50   |
|                       |                 |                     |                          |                     | >emb CAD45025.1  NBS-LRR disease resistance protein homologue [Hordeum vulgare]                                                                                                                                                                                                                                                     | 1440  | 5E-49   |
|                       |                 |                     |                          |                     | >gb AAM94158.1  putative RGA protein 567A-4.7 [Aegilops tauschii]                                                                                                                                                                                                                                                                   | 874   | 8E-49   |
| DV491578              | 1.05E-07        | Mo17<F1<B73         | 4.02                     | 9                   | >gb AAL59230.1  sesquiterpene cyclase [Zea mays]                                                                                                                                                                                                                                                                                    | 631   | 3E-51   |
|                       |                 |                     |                          |                     | >gb AAK73113.1  sesquiterpene cyclase [Zea mays]gb AAG37841.1  sesquiterpene cyclase 1 [Zea mays]                                                                                                                                                                                                                                   | 592   | 6E-51   |
|                       |                 |                     |                          |                     | >gb AAV64216.1  stc [Zea mays]                                                                                                                                                                                                                                                                                                      | 665   | 6E-51   |
|                       |                 |                     |                          |                     | >ref NP_908798.1  putative sesquiterpene cyclase 1 [Oryza sativa (japonica cultivar-group)] dbj BAB63870.1  putative terpene synthase 4 [Oryza sativa (japonica cultivar-group)]                                                                                                                                                    | 547   | 2E-30   |
|                       |                 |                     |                          |                     | >ref XP_480262.1  putative sesquiterpene cyclase 1 [Oryza sativa (japonica cultivar-group)] dbj BAC99543.1  putative sesquiterpene cyclase 1 [Oryza sativa (japonica cultivar-group)]                                                                                                                                               | 605   | 2E-28   |
| BM074072              | 1.11E-07        | Mo17<F1<B73         | 9.37                     | 10                  | >dbj BAD73736.1  putative heme A:farnesyltransferase [Oryza sativa (japonica cultivar-group)] dbj BAD73506.1  putative heme A:farnesyltransferase [Oryza sativa (japonica cultivar-group)]                                                                                                                                          | 435   | 1E-14   |
|                       |                 |                     |                          |                     | >ref NP_918047.1  putative heme A farnesyltransferase homolog [Oryza sativa (japonica cultivar-group)]                                                                                                                                                                                                                              | 449   | 1E-14   |
|                       |                 |                     |                          |                     | >ref NP_566019.1  prenyltransferase/ protoheme IX farnesyltransferase [Arabidopsis thaliana] gb AAM45064.1  putative heme A [Arabidopsis thaliana] gb AAK76626.1  putative heme A:farnesyltransferase [Arabidopsis thaliana] gb AAM14960.1  putative heme A:farnesyltransferase [Arabidopsis thaliana]                              |       |         |
|                       |                 |                     |                          |                     | gb AAC27454.3  putative heme A:farnesyltransferase [Arabidopsis thaliana]                                                                                                                                                                                                                                                           | 431   | 5E-11   |
| BM078960              | 2.16E-07        | Mo17<F1<B73         | 2.17                     | 10                  | >ref XP_462851.1  B1146F03.16 [Oryza sativa (japonica cultivar-group)]dbj BAB93161.1  putative CP12 [Oryza sativa (japonica cultivar-group)] dbj BAB19776.1  contains EST AU078264(S21150)-unknown protein [Oryza sativa (japonica cultivar-group)]                                                                                 | 124   | 2E-26   |
|                       |                 |                     |                          |                     | >emb CAA96570.1  CP12 [Pisum sativum]                                                                                                                                                                                                                                                                                               | 127   | 4E-22   |
|                       |                 |                     |                          |                     | >gb AAV63570.1  auxin-induced putative CP12 domain-containing protein [Arachishypogaea]                                                                                                                                                                                                                                             | 73    | 1E-21   |
|                       |                 |                     |                          |                     | >ref NP_566100.2  CP12-1 [Arabidopsis thaliana]gb AAM47914.1  putative chloroplast protein CP12 [Arabidopsis thaliana] gb AAL32917.1  putative chloroplast protein CP12 [Arabidopsis thaliana]                                                                                                                                      | 124   | 6E-21   |

**Table 4. Microarray analysis results, mode of gene action classification, and BLAST annotation for the 1,367 ESTs identified as differentially expressed among genotypes (15% FDR)**

| GenBank accession no. | Overall P value | Significant pattern | Fold change <sup>†</sup> | Sector <sup>‡</sup> | BLAST annotation*                                                                                                                                                                                                                                                                                                                                                                                                                        | Score | E value |
|-----------------------|-----------------|---------------------|--------------------------|---------------------|------------------------------------------------------------------------------------------------------------------------------------------------------------------------------------------------------------------------------------------------------------------------------------------------------------------------------------------------------------------------------------------------------------------------------------------|-------|---------|
| AI861151              | 2.85E-07        | B73<F1<Mo17         | 2.23                     | 4                   | >ref NP_191800.1  CP12-2 [Arabidopsis thaliana]gb AAM45071.1  putative CP12 protein precursor [Arabidopsis thaliana] gb AAM20142.1  putative CP12 protein precursor [Arabidopsis thaliana] emb CAB82955.1  CP12 protein precursor-like protein [Arabidopsis thaliana]                                                                                                                                                                    | 131   | 3E-20   |
|                       |                 |                     |                          |                     | >gb AAO16692.1  putative Xa1-like protein [Sorghum bicolor]                                                                                                                                                                                                                                                                                                                                                                              | 1284  | 2E-68   |
|                       |                 |                     |                          |                     | >dbj BAD29495.1  putative bacterial blight-resistance protein Xa1 [Oryza sativa(japonica cultivar-group)] dbj BAD28895.1  putative bacterial blight-resistance protein Xa1 [Oryza sativa (japonica cultivar-group)]                                                                                                                                                                                                                      | 1394  | 8E-40   |
|                       |                 |                     |                          |                     | >emb CAD45028.1  NBS-LRR disease resistance protein homologue [Hordeum vulgare]                                                                                                                                                                                                                                                                                                                                                          | 1366  | 5E-37   |
|                       |                 |                     |                          |                     | >ref XP_464903.1  putative bacterial blight-resistance protein Xa1 [Oryza sativa(japonica cultivar-group)] dbj BAD20050.1  putative bacterial blight-resistance protein Xa1 [Oryza sativa (japonica cultivar-group)]                                                                                                                                                                                                                     | 1237  | 2E-36   |
| BG842276              | 3.08E-07        | Mo17<B73=FI         | 2.05                     | 11                  | >emb CAD45025.1  NBS-LRR disease resistance protein homologue [Hordeum vulgare]                                                                                                                                                                                                                                                                                                                                                          | 1440  | 3E-36   |
|                       |                 |                     |                          |                     | >dbj BAD68857.1  unknown protein [Oryza sativa (japonica cultivar-group)]dbj BAD68744.1  unknown protein [Oryza sativa (japonica cultivar-group)]                                                                                                                                                                                                                                                                                        | 58    | 1E-10   |
| CD001309              | 3.24E-07        | Mo17<B73=FI         | 1.43                     | 10                  | >ref NP_917167.1  P0039G05.22 [Oryza sativa (japonica cultivar-group)]                                                                                                                                                                                                                                                                                                                                                                   | 54    | 1E-10   |
|                       |                 |                     |                          |                     | >ref XP_478414.1  putative translational inhibitor protein [Oryza sativa (japonica cultivar-group)] dbj BAC20708.1  putative translational inhibitor protein [Oryza sativa (japonica cultivar-group)] dbj BAD31311.1  putative translational inhibitor protein [Oryza sativa (japonica cultivar-group)]                                                                                                                                  | 180   | 4E-58   |
|                       |                 |                     |                          |                     | >dbj BAD00048.1  perchloric acid soluble translation inhibitor protein homolog[Gentiana triflora] dbj BAC66487.1  translation-inhibitor protein [Gentiana triflora]                                                                                                                                                                                                                                                                      | 188   | 5E-54   |
|                       |                 |                     |                          |                     | >ref NP_188674.1  endoribonuclease [Arabidopsis thaliana]gb AAK53030.1  AT3g20390/MQC12_15 [Arabidopsis thaliana] gb AAL31178.1  AT3g20390/MQC12_15 [Arabidopsis thaliana] gb AAM63246.1  translational inhibitor protein, putative [Arabidopsis thaliana]                                                                                                                                                                               | 187   | 1E-52   |
|                       |                 |                     |                          |                     | >dbj BAB02821.1  unnamed protein product [Arabidopsis thaliana]                                                                                                                                                                                                                                                                                                                                                                          | 143   | 1E-52   |
| BM348610              | 3.27E-07        | Mo17<F1<B73         | 1.97                     | 10                  | >emb CAE56534.1  Hypothetical protein CBG24261 [Caenorhabditis briggsae]                                                                                                                                                                                                                                                                                                                                                                 | 172   | 1E-32   |
|                       |                 |                     |                          |                     | >gb ABA96667.1  jacalin homolog [Oryza sativa (japonica cultivar-group)]                                                                                                                                                                                                                                                                                                                                                                 | 307   | 6E-18   |
|                       |                 |                     |                          |                     | >gb ABA94002.1  NBS-LRR resistance protein, putative [Oryza sativa (japonica cultivar-group)]                                                                                                                                                                                                                                                                                                                                            | 1386  | 3E-17   |
|                       |                 |                     |                          |                     | >gb ABA97248.1  jacalin homolog [Oryza sativa (japonica cultivar-group)]gb ABB51090.1  mannose-specific jacalin-related lectin [Oryza sativa (japonica cultivar-group)]                                                                                                                                                                                                                                                                  | 306   | 3E-16   |
|                       |                 |                     |                          |                     | >ref XP_470893.1  putative salt-induced protein [Oryza sativa (japonica cultivar-group)] gb AAP12924.1  putative salt-induced protein [Oryza sativa (japonica cultivar-group)] gb AAK55472.1  putative salt-induced protein [Oryza sativa (japonica cultivar-group)]                                                                                                                                                                     | 191   | 1E-14   |
| DV549526              | 3.52E-07        | Mo17<F1<B73         | 2.11                     | 10                  | >gb ABA93998.1  stripe rust resistance protein Yr10 [Oryza sativa (japonica cultivar-group)]                                                                                                                                                                                                                                                                                                                                             | 1384  | 1E-14   |
|                       |                 |                     |                          |                     | ns                                                                                                                                                                                                                                                                                                                                                                                                                                       |       |         |
| BM073941              | 3.83E-07        | Mo17<B73=FI         | 87.98                    | 10                  | >gb AAX96835.1  Similar to beta-amyrin synthase [Oryza sativa (japonica cultivar-group)] gb ABA92749.1  beta-amyrin synthase, putative [Oryza sativa (japonica cultivar-group)]                                                                                                                                                                                                                                                          | 548   | 2E-48   |
|                       |                 |                     |                          |                     | >emb CAC84558.1  beta-amyrin synthase [Avena strigosa]gb AAT38897.1  beta-amyrin synthase [Avena strigosa]                                                                                                                                                                                                                                                                                                                               | 757   | 4E-41   |
|                       |                 |                     |                          |                     | >gb AAT38896.1  beta-amyrin synthase [Avena prostrata]                                                                                                                                                                                                                                                                                                                                                                                   | 757   | 4E-41   |
|                       |                 |                     |                          |                     | >gb AAT38895.1  beta-amyrin synthase [Avena longiglumis]                                                                                                                                                                                                                                                                                                                                                                                 | 757   | 4E-41   |
|                       |                 |                     |                          |                     | >gb AAT38894.1  beta-amyrin synthase [Avena longiglumis]                                                                                                                                                                                                                                                                                                                                                                                 | 757   | 4E-41   |
| CD573354              | 3.89E-07        | Mo17<F1<B73         | 1.73                     | 10                  | >gb AAU44034.1  putative tonneau 2 [Oryza sativa (japonica cultivar-group)]                                                                                                                                                                                                                                                                                                                                                              | 488   | 2E-62   |
|                       |                 |                     |                          |                     | >ref NP_568364.1  FASS (FASS 1) [Arabidopsis thaliana]gb AAM44936.1  unknown protein [Arabidopsis thaliana] gb AAK26026.1  unknown protein [Arabidopsis thaliana] gb AAG35778.1  tonneau 2 [Arabidopsis thaliana] gb AAG35792.1  tonneau 2 [Arabidopsis thaliana]                                                                                                                                                                        | 480   | 3E-59   |
| BM080257              | 4.13E-07        | Mo17<F1<B73         | 2.07                     | 10                  | >gb ABA96667.1  jacalin homolog [Oryza sativa (japonica cultivar-group)]                                                                                                                                                                                                                                                                                                                                                                 | 307   | 2E-23   |
|                       |                 |                     |                          |                     | >gb ABA94002.1  NBS-LRR resistance protein, putative [Oryza sativa (japonica cultivar-group)]                                                                                                                                                                                                                                                                                                                                            | 1386  | 8E-23   |
|                       |                 |                     |                          |                     | >gb ABA97248.1  jacalin homolog [Oryza sativa (japonica cultivar-group)]gb ABB51090.1  mannose-specific jacalin-related lectin [Oryza sativa (japonica cultivar-group)]                                                                                                                                                                                                                                                                  | 306   | 2E-21   |
|                       |                 |                     |                          |                     | >ref NP_908901.1  Mannose-Binding Rice Lectin [Oryza sativa (japonica cultivar-group)] gb AAK82986.1  salt-induced protein [Oryza sativa (japonica cultivar-group)] gb AAL30827.1  lectin-like protein [Oryza sativa] dbj BAB93403.1  salT gene product [Oryza sativa (japonica cultivar-group)] dbj BAB63898.1  salT gene product [Oryza sativa (japonica cultivar-group)] dbj BAA25369.1  MRL [Oryza sativa (japonica cultivar-group)] | 145   | 6E-21   |
|                       |                 |                     |                          |                     | >emb CAA81059.1  salT [Oryza sativa]gb AAB23484.1  15 kDa organ-specific salt-induced protein [Oryza sativa] sp P24120 SALT_ORYSA Salt stress-induced protein (Salt protein)                                                                                                                                                                                                                                                             | 145   | 8E-21   |
| CB331053              | 4.26E-07        | Mo17<F1<B73         | 2.06                     | 10                  | ns                                                                                                                                                                                                                                                                                                                                                                                                                                       |       |         |
| BM332688              | 4.35E-07        | Mo17<F1<B73         | 1.95                     | 10                  | >ref XP_473776.1  OSJNBa0041A02.14 [Oryza sativa (japonica cultivar-group)]emb CAD41867.2  OSJNBa0041A02.14 [Oryza sativa (japonica cultivar-group)]                                                                                                                                                                                                                                                                                     | 396   | 8E-59   |
|                       |                 |                     |                          |                     | >emb CA67728.1  pectinacetyltransferase precursor [Vigna radiata var. radiata]                                                                                                                                                                                                                                                                                                                                                           | 399   | 3E-43   |
|                       |                 |                     |                          |                     | >ref NP_193677.2  carboxylic ester hydrolase [Arabidopsis thaliana]gb AAU45212.1  At4g19420 [Arabidopsis thaliana] gb AAT70429.1  At4g19420 [Arabidopsis thaliana]                                                                                                                                                                                                                                                                       | 397   | 1E-39   |
|                       |                 |                     |                          |                     | >dbj BAD94548.1  pectinacetyltransferase like protein [Arabidopsis thaliana]                                                                                                                                                                                                                                                                                                                                                             | 195   | 1E-39   |
|                       |                 |                     |                          |                     | >ref XP_467338.1  putative pectin acetyltransferase [Oryza sativa (japonica cultivar-group)] dbj BAD08059.1  putative pectin acetyltransferase [Oryza sativa (japonica cultivar-group)] dbj BAD07550.1  putative pectin acetyltransferase [Oryza sativa (japonica cultivar-group)]                                                                                                                                                       | 397   | 9E-37   |
| BM338343              | 4.48E-07        | B73<F1<Mo17         | 3.74                     | 3                   | ns                                                                                                                                                                                                                                                                                                                                                                                                                                       |       |         |

**Table 4. Microarray analysis results, mode of gene action classification, and BLAST annotation for the 1,367 ESTs identified as differentially expressed among genotypes (15% FDR)**

| GenBank accession no. | Overall P value | Significant pattern | Fold change <sup>†</sup> | Sector <sup>‡</sup> | BLAST annotation*                                                                                                                                                                                                                                                                                                                                                                                                                                                                                                                                                                                                                                                                                                                                                                                                                                                                                                                                                                                                                                                                              | Score | E value |
|-----------------------|-----------------|---------------------|--------------------------|---------------------|------------------------------------------------------------------------------------------------------------------------------------------------------------------------------------------------------------------------------------------------------------------------------------------------------------------------------------------------------------------------------------------------------------------------------------------------------------------------------------------------------------------------------------------------------------------------------------------------------------------------------------------------------------------------------------------------------------------------------------------------------------------------------------------------------------------------------------------------------------------------------------------------------------------------------------------------------------------------------------------------------------------------------------------------------------------------------------------------|-------|---------|
| BM073284              | 5.60E-07        | B73<F1=Mo17         | 16.57                    | 3                   | >sp P56879 CIRB CHAPA Circulin-B (CIRB)                                                                                                                                                                                                                                                                                                                                                                                                                                                                                                                                                                                                                                                                                                                                                                                                                                                                                                                                                                                                                                                        | 31    | 7E-7    |
| CB331466              | 5.96E-07        | Mo17<F1<B73         | 2.38                     | 10                  | >dbj BAD53494.1  putative Synoviolin 1 [Oryza sativa (japonica cultivar-group)]dbj BAD53976.1  putative Synoviolin 1 [Oryza sativa (japonica cultivar-group)]<br>>ref NP_188230.1  protein binding / ubiquitin-protein ligase/ zinc ion binding[Arabidopsis thaliana] gb AAY57599.1  RING finger family protein [Arabidopsis thaliana] dbj BAB02675.1  unnamed protein product [Arabidopsis thaliana] dbj BAC41836.1  putative zinc finger protein [Arabidopsis thaliana]<br>>ref NP_849843.3  protein binding / ubiquitin-protein ligase/ zinc ion binding[Arabidopsis thaliana] gb AAR23700.1  At1g65040 [Arabidopsis thaliana] dbj BAD42325.1  Hrd1p like protein [Arabidopsis thaliana]<br>>ref NP_176684.3  protein binding / ubiquitin-protein ligase/ zinc ion binding[Arabidopsis thaliana]<br>>gb AAF06038.1  Contains a PF00097 Zinc finger, C3HC4 type (RING finger) domain. ESTs gb N96912 and gb AI994359 come from this gene. [Arabidopsis thaliana]                                                                                                                             | 500   | 1E-31   |
|                       |                 |                     |                          |                     |                                                                                                                                                                                                                                                                                                                                                                                                                                                                                                                                                                                                                                                                                                                                                                                                                                                                                                                                                                                                                                                                                                | 492   | 4E-26   |
|                       |                 |                     |                          |                     |                                                                                                                                                                                                                                                                                                                                                                                                                                                                                                                                                                                                                                                                                                                                                                                                                                                                                                                                                                                                                                                                                                | 460   | 3E-24   |
|                       |                 |                     |                          |                     |                                                                                                                                                                                                                                                                                                                                                                                                                                                                                                                                                                                                                                                                                                                                                                                                                                                                                                                                                                                                                                                                                                | 389   | 3E-24   |
|                       |                 |                     |                          |                     |                                                                                                                                                                                                                                                                                                                                                                                                                                                                                                                                                                                                                                                                                                                                                                                                                                                                                                                                                                                                                                                                                                | 496   | 2E-20   |
| CD661786              | 6.09E-07        | Mo17<F1<B73         | 2.62                     | 10                  | >ref XP_470140.1  unknown protein [Oryza sativa (japonica cultivar-group)]gb AAO65872.1  unknown protein [Oryza sativa (japonica cultivar-group)]<br>>ref NP_190229.1  transporter [Arabidopsis thaliana]emb CAB62036.1  putative protein [Arabidopsis thaliana] gb AAM78037.1  AT3g46450/F18L15_170 [Arabidopsis thaliana] gb AAM19794.1  AT3g46450/F18L15_170 [Arabidopsis thaliana]<br>>ref NP_974390.1  transporter [Arabidopsis thaliana]                                                                                                                                                                                                                                                                                                                                                                                                                                                                                                                                                                                                                                                 | 474   | 3E-9    |
|                       |                 |                     |                          |                     |                                                                                                                                                                                                                                                                                                                                                                                                                                                                                                                                                                                                                                                                                                                                                                                                                                                                                                                                                                                                                                                                                                | 486   | 1E-6    |
|                       |                 |                     |                          |                     |                                                                                                                                                                                                                                                                                                                                                                                                                                                                                                                                                                                                                                                                                                                                                                                                                                                                                                                                                                                                                                                                                                | 494   | 1E-6    |
| BM350119              | 6.58E-07        | Mo17<F1<B73         | 2.54                     | 10                  | >gb AAT77407.1  unknown protein [Oryza sativa (japonica cultivar-group)]<br>>dbj BAB74712.1  all3013 [Nostoc sp. PCC 7120]ref NP_487053.1  hypothetical protein all3013 [Nostoc sp. PCC 7120]<br>>gb ABA20522.1  Protein of unknown function DUF561 [Anabaena variabilis ATCC 29413]ref YP_321417.1  Protein of unknown function DUF561 [Anabaena variabilis ATCC 29413]<br>>ref ZP_00514859.1  Protein of unknown function DUF561 [Crocospaera watsonii WH 8501]gb EAM52697.1  Protein of unknown function DUF561 [Crocospaera watsonii WH 8501]<br>>ref ZP_00107581.1  COG0294: Dihydropteroate synthase and related enzymes [Nostocpunctiforme PCC 73102]                                                                                                                                                                                                                                                                                                                                                                                                                                   | 297   | 6E-52   |
|                       |                 |                     |                          |                     |                                                                                                                                                                                                                                                                                                                                                                                                                                                                                                                                                                                                                                                                                                                                                                                                                                                                                                                                                                                                                                                                                                | 247   | 1E-33   |
|                       |                 |                     |                          |                     |                                                                                                                                                                                                                                                                                                                                                                                                                                                                                                                                                                                                                                                                                                                                                                                                                                                                                                                                                                                                                                                                                                | 247   | 5E-33   |
|                       |                 |                     |                          |                     |                                                                                                                                                                                                                                                                                                                                                                                                                                                                                                                                                                                                                                                                                                                                                                                                                                                                                                                                                                                                                                                                                                | 246   | 3E-32   |
|                       |                 |                     |                          |                     |                                                                                                                                                                                                                                                                                                                                                                                                                                                                                                                                                                                                                                                                                                                                                                                                                                                                                                                                                                                                                                                                                                | 248   | 4E-32   |
| DV550757              | 6.72E-07        | Mo17<F1<B73         | 3.86                     | 9                   | >dbj BAD72327.1  unknown protein [Oryza sativa (japonica cultivar-group)]<br>>ref NP_200157.2  ORG1; ATP binding / kinase/ protein kinase/ proteinserine/threonine kinase [Arabidopsis thaliana] gb AAL38683.1  unknown protein [Arabidopsis thaliana]<br>>ref NP_851182.1  ORG1; ATP binding / kinase/ protein kinase/ proteinserine/threonine kinase [Arabidopsis thaliana] ref NP_001032069.1  ORG1; ATP binding / kinase/ protein kinase/ protein serine/threonine kinase [Arabidopsis thaliana] gb AAP37769.1  At5g53450 [Arabidopsis thaliana] dbj BAA97322.1  unnamed protein product [Arabidopsis thaliana] gb AAN72012.1  putative protein [Arabidopsis thaliana]                                                                                                                                                                                                                                                                                                                                                                                                                     | 650   | 2E-59   |
|                       |                 |                     |                          |                     |                                                                                                                                                                                                                                                                                                                                                                                                                                                                                                                                                                                                                                                                                                                                                                                                                                                                                                                                                                                                                                                                                                | 590   | 5E-27   |
|                       |                 |                     |                          |                     |                                                                                                                                                                                                                                                                                                                                                                                                                                                                                                                                                                                                                                                                                                                                                                                                                                                                                                                                                                                                                                                                                                | 670   | 5E-27   |
| BG841837              | 7.62E-07        | Mo17<F1<B73         | 2.38                     | 9                   | ns                                                                                                                                                                                                                                                                                                                                                                                                                                                                                                                                                                                                                                                                                                                                                                                                                                                                                                                                                                                                                                                                                             |       |         |
| BM336348              | 7.72E-07        | Mo17<F1<B73         | 1.7                      | 10                  | >dbj BAD28236.1  putative ASR2 [Oryza sativa (japonica cultivar-group)]<br>>gb AAY98008.1  ASR3 [Solanum habrochaites]gb AAY98005.1  ASR3 [Lycopersicon peruvianum var. humifusum] gb AAY98004.1  ASR3 [Lycopersicon cheesmaniae]<br>>gb AAY98007.1  ASR3 [Lycopersicon chilense]<br>>gb AAY98003.1  ASR3 [Lycopersicon esculentum var. cerasiforme]<br>>gb AAP46155.1  ASR-like protein 1 [Hevea brasiliensis]                                                                                                                                                                                                                                                                                                                                                                                                                                                                                                                                                                                                                                                                                | 105   | 6E-10   |
|                       |                 |                     |                          |                     |                                                                                                                                                                                                                                                                                                                                                                                                                                                                                                                                                                                                                                                                                                                                                                                                                                                                                                                                                                                                                                                                                                | 108   | 1E-9    |
|                       |                 |                     |                          |                     |                                                                                                                                                                                                                                                                                                                                                                                                                                                                                                                                                                                                                                                                                                                                                                                                                                                                                                                                                                                                                                                                                                | 108   | 1E-9    |
|                       |                 |                     |                          |                     |                                                                                                                                                                                                                                                                                                                                                                                                                                                                                                                                                                                                                                                                                                                                                                                                                                                                                                                                                                                                                                                                                                | 108   | 1E-9    |
|                       |                 |                     |                          |                     |                                                                                                                                                                                                                                                                                                                                                                                                                                                                                                                                                                                                                                                                                                                                                                                                                                                                                                                                                                                                                                                                                                | 108   | 3E-9    |
| CB280860              | 8.51E-07        | Mo17<F1<B73         | 3.79                     | 9                   | ns                                                                                                                                                                                                                                                                                                                                                                                                                                                                                                                                                                                                                                                                                                                                                                                                                                                                                                                                                                                                                                                                                             |       |         |
| BM074011              | 9.71E-07        | Mo17<F1<B73         | 2.08                     | 10                  | >emb CAA48641.1  type II light-harvesting chlorophyll a /b-binding protein [Zeamays]<br>>gb AAC28490.1  photosystem II type II chlorophyll a/b binding protein [Sorghumbicolor]<br>>gb AAA18555.1  putative. light-harvesting chlorophyll A/B binding protein<br>>ref NP_178585.1  LHCB2.1; chlorophyll binding [Arabidopsis thaliana]gb AAD31358.1  putative chlorophyll a/b binding protein [Arabidopsis thaliana] gb AAK96540.1  At2g05100/F15L11.2 [Arabidopsis thaliana] gb AAK96468.1  At2g05100/F15L11.2 [Arabidopsis thaliana] gb AAN71932.1  putative chlorophyll a/b binding protein [Arabidopsis thaliana]<br>>gb AAT81763.1  chlorophyll a/b binding protein [Oryza sativa (japonicacultivar-group)]                                                                                                                                                                                                                                                                                                                                                                               | 229   | 9E-9    |
|                       |                 |                     |                          |                     |                                                                                                                                                                                                                                                                                                                                                                                                                                                                                                                                                                                                                                                                                                                                                                                                                                                                                                                                                                                                                                                                                                | 191   | 9E-9    |
|                       |                 |                     |                          |                     |                                                                                                                                                                                                                                                                                                                                                                                                                                                                                                                                                                                                                                                                                                                                                                                                                                                                                                                                                                                                                                                                                                | 35    | 3E-8    |
|                       |                 |                     |                          |                     |                                                                                                                                                                                                                                                                                                                                                                                                                                                                                                                                                                                                                                                                                                                                                                                                                                                                                                                                                                                                                                                                                                | 265   | 4E-8    |
|                       |                 |                     |                          |                     |                                                                                                                                                                                                                                                                                                                                                                                                                                                                                                                                                                                                                                                                                                                                                                                                                                                                                                                                                                                                                                                                                                | 263   | 4E-8    |
| DV550511              | 9.76E-07        | Mo17<F1<B73         | 2.93                     | 10                  | >gb AAY26526.1  12-oxo-phytyldienoic acid reductase [Zea mays]<br>>emb CAD89605.1  oxo-phytyldienoic acid reductase [Oryza sativa (japonicacultivar-group)]<br>>dbj BAD35835.1  putative 12-oxophytodienoic acid reductase [Oryza sativa (japonicacultivar-group)] dbj BAD35327.1  putative 12-oxophytodienoic acid reductase [Oryza sativa (japonica cultivar-group)]<br>>dbj BAD35833.1  putative 12-oxophytodienoic acid reductase [Oryza sativa (japonicacultivar-group)] dbj BAD35325.1  putative 12-oxophytodienoic acid reductase [Oryza sativa (japonica cultivar-group)]<br>>emb CAD89604.1  oxo-phytyldienoic acid reductase [Oryza sativa (japonicacultivar-group)] dbj BAD35834.1  12-oxophytodienoic acid reductase [Oryza sativa (japonica cultivar-group)] dbj BAD35326.1  12-oxophytodienoic acid reductase [Oryza sativa (japonica cultivar-group)] dbj BAD26703.1  12-oxo-phytyldienoic acid reductase [Oryza sativa (japonica cultivar-group)] dbj BAC20139.1  12-oxophytodienoic acid reductase [Oryza sativa] pir JC8028 cis-12-oxo-phytyldienoic acid-reductase 1 - rice | 372   | 4E-33   |
|                       |                 |                     |                          |                     |                                                                                                                                                                                                                                                                                                                                                                                                                                                                                                                                                                                                                                                                                                                                                                                                                                                                                                                                                                                                                                                                                                | 237   | 3E-23   |
|                       |                 |                     |                          |                     |                                                                                                                                                                                                                                                                                                                                                                                                                                                                                                                                                                                                                                                                                                                                                                                                                                                                                                                                                                                                                                                                                                | 264   | 3E-23   |
|                       |                 |                     |                          |                     |                                                                                                                                                                                                                                                                                                                                                                                                                                                                                                                                                                                                                                                                                                                                                                                                                                                                                                                                                                                                                                                                                                | 376   | 3E-23   |
| BM334482              | 1.03E-06        | Mo17<F1<B73         | 2.37                     | 9                   | ns                                                                                                                                                                                                                                                                                                                                                                                                                                                                                                                                                                                                                                                                                                                                                                                                                                                                                                                                                                                                                                                                                             |       |         |
| DV493868              | 1.15E-06        | Mo17<B73=F1         | 2.19                     | 10                  | ns                                                                                                                                                                                                                                                                                                                                                                                                                                                                                                                                                                                                                                                                                                                                                                                                                                                                                                                                                                                                                                                                                             |       |         |

**Table 4. Microarray analysis results, mode of gene action classification, and BLAST annotation for the 1,367 ESTs identified as differentially expressed among genotypes (15% FDR)**

| GenBank accession no. | Overall P value | Significant pattern | Fold change <sup>†</sup> | Sector <sup>‡</sup> | BLAST annotation*                                                                                                                                                                                                                                                                                                                                                                                                                                                                                                                                                                                                                                                                                                                                                                                                                                                                                                                                                                                                                                                                                                   | Score                           | E value                                   |
|-----------------------|-----------------|---------------------|--------------------------|---------------------|---------------------------------------------------------------------------------------------------------------------------------------------------------------------------------------------------------------------------------------------------------------------------------------------------------------------------------------------------------------------------------------------------------------------------------------------------------------------------------------------------------------------------------------------------------------------------------------------------------------------------------------------------------------------------------------------------------------------------------------------------------------------------------------------------------------------------------------------------------------------------------------------------------------------------------------------------------------------------------------------------------------------------------------------------------------------------------------------------------------------|---------------------------------|-------------------------------------------|
| BM080645              | 1.27E-06        | Mo17<B73<F1         | 2.08                     | 11                  | >dbj BAD68857.1  unknown protein [Oryza sativa (japonica cultivar-group)]dbj BAD68744.1  unknown protein [Oryza sativa (japonica cultivar-group)]<br>>ref NP_917167.1  P0039G05.22 [Oryza sativa (japonica cultivar-group)]                                                                                                                                                                                                                                                                                                                                                                                                                                                                                                                                                                                                                                                                                                                                                                                                                                                                                         | 58<br>54                        | 1E-10<br>1E-10                            |
| BM333995              | 1.38E-06        | Mo17<F1<B73         | 1.86                     | 10                  | >gb AAV88601.1  low temperature and salt responsive protein [Pennisetum glaucum]<br>>ref XP_479247.1  putative low temperature and salt responsive protein [Oryza sativa(japonica cultivar-group)] gb AAS72305.1  drought-induced hydrophobic protein [Oryza sativa (japonica cultivar-group)] dbj BAC16385.1  putative low temperature and salt responsive protein [Oryza sativa (japonica cultivar-group)]<br>sp Q8H5T6 LTI6A_ORYSA Hydrophobic protein LTI6A (Low temperature-induced protein 6A) gb AAT37941.1  low temperature-induced low molecular weight integral membrane protein LTI6a [Oryza sativa (japonica cultivar-group)]<br>>ref NP_908456.1  unnamed protein product [Oryza sativa (japonica cultivar-group)]                                                                                                                                                                                                                                                                                                                                                                                     | 56<br>56<br>537                 | 4E-17<br>6E-16<br>4E-14                   |
| DV550844              | 1.53E-06        | B73<F1=Mo17         | 2.05                     | 3                   | >dbj BAD34659.1  plasma membrane protein 3 [Leymus chinensis]<br>>dbj BAD34658.1  plasma membrane protein 3 [Leymus chinensis]                                                                                                                                                                                                                                                                                                                                                                                                                                                                                                                                                                                                                                                                                                                                                                                                                                                                                                                                                                                      | 54<br>54                        | 6E-13<br>8E-13                            |
| BM379118              | 1.56E-06        | Mo17<F1<B73         | 1.89                     | 10                  | ns<br>>ref XP_475416.1  putative 40S ribosomal protein S26 [Oryza sativa (japonica cultivar-group)] gb AAT01360.1  putative 40S ribosomal protein S26 [Oryza sativa (japonica cultivar-group)]<br>>dbj BAD87076.1  putative ribosomal protein S26 [Oryza sativa (japonica cultivar-group)] dbj BAD73505.1  putative ribosomal protein S26 [Oryza sativa (japonica cultivar-group)]<br>>sp P49216 RS26_ORYSA 40S ribosomal protein S26 (S31)dbj BAA07208.1  ribosomal protein S31 [Oryza sativa (japonica cultivar-group)]<br>>gb AAD47346.1  ribosomal protein S26 [Pisum sativum]<br>>ref NP_191193.1  structural constituent of ribosome [Arabidopsis thaliana]emb CAB87433.1  40S ribosomal protein S26 homolog [Arabidopsis thaliana]<br>gb AAM91494.1 AT3g56340/F18O21_300 [Arabidopsis thaliana] gb AAK63990.1 AT3g56340/F18O21_300 [Arabidopsis thaliana]                                                                                                                                                                                                                                                    | 194<br>133<br>133<br>130<br>130 | 5E-32<br>5E-32<br>5E-31<br>2E-26<br>1E-25 |
| CB885848              | 1.56E-06        | Mo17<F1<B73         | 1.5                      | 9                   | ns                                                                                                                                                                                                                                                                                                                                                                                                                                                                                                                                                                                                                                                                                                                                                                                                                                                                                                                                                                                                                                                                                                                  |                                 |                                           |
| BM080387              | 1.59E-06        | Mo17<B73=F1         | 1.84                     | 10                  | >ref NP_915433.1  putative triosephosphate isomerase [Oryza sativa (japonica cultivar-group)] dbj BAB93230.1  putative triosephosphate isomerase [Oryza sativa (japonica cultivar-group)]<br>>ref XP_462797.1  putative triosephosphate isomerase [Oryza sativa (japonica cultivar-group)] dbj BAB21144.1  putative triosephosphate isomerase [Oryza sativa (japonica cultivar-group)] dbj BAB43989.1  putative triosephosphate isomerase [Oryza sativa (japonica cultivar-group)] sp P48494 TPIS_ORYSA Triosephosphate isomerase, cytosolic (TIM) (Triose-phosphate isomerase) gb AAA18541.1  triosephosphate isomerase<br>>gb AAB81110.1  triosephosphate isomerase 1 [Zea mays]sp P12863 TPIS_MAIZE Triosephosphate isomerase, cytosolic (TIM) (Triose-phosphate isomerase) dbj BAA00009.1  triosephosphate isomerase [Zea mays]<br>>gb ABA46792.1  triosephosphate isomerase-like protein [Solanum tuberosum]<br>>emb CAA81487.1  triosephosphate isomerase [Secale cereale]sp P46226 TPIS_SECCE Triosephosphate isomerase, cytosolic (TIM) (Triose-phosphate isomerase) prf 2109226A triosephosphate isomerase | 255<br>253<br>253<br>257<br>253 | 1E-55<br>3E-51<br>8E-50<br>3E-49<br>5E-49 |
| BM073783              | 1.66E-06        | Mo17<B73=F1         | 26.95                    | 10                  | ns                                                                                                                                                                                                                                                                                                                                                                                                                                                                                                                                                                                                                                                                                                                                                                                                                                                                                                                                                                                                                                                                                                                  |                                 |                                           |
| CD662028              | 1.67E-06        | Mo17<F1<B73         | 1.61                     | 10                  | ns                                                                                                                                                                                                                                                                                                                                                                                                                                                                                                                                                                                                                                                                                                                                                                                                                                                                                                                                                                                                                                                                                                                  |                                 |                                           |
| DV490342              | 1.69E-06        | B73<F1=Mo17         | 1.99                     | 3                   | >gb AAO72582.1  unknown [Oryza sativa (japonica cultivar-group)]<br>>ref NP_567639.1  unknown protein [Arabidopsis thaliana]gb AAK93755.1  unknown protein [Arabidopsis thaliana] gb AAK28638.1  unknown protein [Arabidopsis thaliana]<br>>gb AAM62876.1  unknown [Arabidopsis thaliana]<br>>gb AAT85217.1  unknown protein [Oryza sativa (japonica cultivar-group)]<br>>ref NP_192392.1  unknown protein [Arabidopsis thaliana]emb CAB80848.1  putative protein [Arabidopsis thaliana] gb AAM10171.1  unknown protein [Arabidopsis thaliana] gb AAL24428.1  Unknown protein [Arabidopsis thaliana] gb AAM67017.1  unknown [Arabidopsis thaliana] gb AAD03444.1  contains similarity to Methanobacterium thermoautotrophicum transcriptional regulator (GB:AE000850) [Arabidopsis thaliana]                                                                                                                                                                                                                                                                                                                        | 168<br>202<br>202<br>229<br>139 | 1E-69<br>4E-62<br>4E-62<br>3E-61<br>2E-59 |
| BM073887              | 1.97E-06        | Mo17<F1<B73         | 1.64                     | 10                  | >gb AAV66923.1  peroxiredoxin Q [Triticum aestivum]<br>>dbj BAD35223.1  putative peroxiredoxin Q [Oryza sativa (japonica cultivar-group)]<br>>gb AAS46230.1  peroxiredoxin Q [Populus balsamifera subsp. trichocarpa x Populusdeltoides]<br>>dbj BAA90524.1  peroxiredoxin Q [Sedum lineare]<br>>dbj BAD04985.1  peroxiredoxin Q [Gentiana triflora]                                                                                                                                                                                                                                                                                                                                                                                                                                                                                                                                                                                                                                                                                                                                                                | 217<br>217<br>213<br>186<br>217 | 1E-46<br>3E-45<br>8E-44<br>7E-43<br>6E-42 |
| CB380836              | 2.03E-06        | Mo17<F1<B73         | 1.59                     | 10                  | ns                                                                                                                                                                                                                                                                                                                                                                                                                                                                                                                                                                                                                                                                                                                                                                                                                                                                                                                                                                                                                                                                                                                  |                                 |                                           |
| CB351538              | 2.05E-06        | Mo17<F1<B73         | 1.75                     | 10                  | >ref XP_472647.1  OSJNBa0027P08.12 [Oryza sativa (japonica cultivar-group)]emb CAD40966.2  OSJNBa0027P08.12 [Oryza sativa (japonica cultivar-group)]<br>>dbj BAD44498.1  hypothetical protein [Arabidopsis thaliana]dbj BAD43285.1  hypothetical protein [Arabidopsis thaliana]                                                                                                                                                                                                                                                                                                                                                                                                                                                                                                                                                                                                                                                                                                                                                                                                                                     | 198<br>201                      | 3E-43<br>6E-20                            |
| DV622216              | 2.12E-06        | B73=F1<Mo17         | 1.74                     | 4                   | >ref XP_550490.1  putative beta 1,3 glucan synthase [Oryza sativa (japonica cultivar-group)] dbj BAD67750.1  putative beta 1,3 glucan synthase [Oryza sativa (japonica cultivar-group)]<br>>gb AAY90061.1  putative 1,3-beta-glucan synthase 12 [Triticum aestivum]<br>>ref NP_912451.1  Putative callose synthase [Oryza sativa (japonica cultivar-group)]gb AAO15292.1  Putative callose synthase [Oryza sativa (japonica cultivar-group)]                                                                                                                                                                                                                                                                                                                                                                                                                                                                                                                                                                                                                                                                        | 1771<br>108<br>2055             | 3E-34<br>1E-33<br>1E-27                   |

**Table 4. Microarray analysis results, mode of gene action classification, and BLAST annotation for the 1,367 ESTs identified as differentially expressed among genotypes (15% FDR)**

| GenBank accession no. | Overall P value | Significant pattern | Fold change <sup>†</sup> | Sector <sup>‡</sup> | BLAST annotation*                                                                                                                                                                                                                                                                                                                                                                                                                                                                                                                                       | Score | E value |
|-----------------------|-----------------|---------------------|--------------------------|---------------------|---------------------------------------------------------------------------------------------------------------------------------------------------------------------------------------------------------------------------------------------------------------------------------------------------------------------------------------------------------------------------------------------------------------------------------------------------------------------------------------------------------------------------------------------------------|-------|---------|
|                       |                 |                     |                          |                     | >ref NP_850271.1  ATGSL08 (GLUCAN SYNTHASE-LIKE 8); 1,3-beta-glucan synthase/transferase, transferring glycosyl groups [Arabidopsis thaliana]                                                                                                                                                                                                                                                                                                                                                                                                           | 1680  | 2E-27   |
|                       |                 |                     |                          |                     | >gb AAD31571.1  putative glucan synthase [Arabidopsis thaliana]                                                                                                                                                                                                                                                                                                                                                                                                                                                                                         | 784   | 2E-27   |
| BM348583              | 2.16E-06        | Mo17<B73=F1         | 26                       | 10                  | >ref XP_482909.1  putative cytochrome P450 [Oryza sativa (japonica cultivar-group)]dbj BAD09367.1  putative cytochrome P450 [Oryza sativa (japonica cultivar-group)]                                                                                                                                                                                                                                                                                                                                                                                    | 510   | 2E-6    |
| BG841156              | 2.46E-06        | B73<F1=Mo17         | 2.02                     | 2                   | >ref XP_550207.1  putative carboxypeptidase D [Oryza sativa (japonica cultivar-group)] dbj BAD61439.1  putative carboxypeptidase D [Oryza sativa (japonica cultivar-group)]                                                                                                                                                                                                                                                                                                                                                                             | 471   | 7E-74   |
|                       |                 |                     |                          |                     | >emb CAB58992.1  serine carboxypeptidase II-1 [Hordeum vulgare subsp. vulgare]gb AAB31591.1  CP-MII.1-serine carboxypeptidase [Hordeum vulgare-barley, cv. Alexis, aleurone, Peptide, 324 aa] sp P55747 CBP21_HORVU Serine carboxypeptidase II-1 precursor (CP-MII.1) [Contains: Serine carboxypeptidase II-1 chain A; Serine carboxypeptidase II-1 chain B]                                                                                                                                                                                            | 324   | 2E-71   |
|                       |                 |                     |                          |                     | >ref NP_909340.1  putative carboxypeptidase D [Oryza sativa (japonica cultivar-group)] dbj BAB08188.1  Similar to Hordeum vulgare carboxypeptidase D precursor (T05701) [Oryza sativa (japonica cultivar-group)]                                                                                                                                                                                                                                                                                                                                        | 490   | 5E-71   |
|                       |                 |                     |                          |                     | >gb AAV43957.1  putative serine carboxypeptidase II [Oryza sativa (japonica cultivar-group)]                                                                                                                                                                                                                                                                                                                                                                                                                                                            | 483   | 7E-61   |
|                       |                 |                     |                          |                     | >sp P08819_2 [Segment 2 of 2] Serine carboxypeptidase II (Carboxypeptidase D)(CPDW-II) (CP-WII) [Contains: Serine carboxypeptidase II chain A; Serine carboxypeptidase II chain B] pdb BCS B Chain B, Complex Of The Wheat Serine Carboxypeptidase, Cpdw-Ii, With The Microbial Peptide Aldehyde Inhibitor, Chymostatin, And Arginine At 100 Degrees Kelvin pdb BCR B Chain B, Complex Of The Wheat Serine Carboxypeptidase, Cpdw-Ii, With The Microbial Peptide Aldehyde Inhibitor, Antipain, And Arginine At Room Temperature prf I408164B CPase II B | 160   | 6E-58   |
| BG842726              | 2.48E-06        | Mo17<F1<B73         | 1.95                     | 10                  | >gb ABA96667.1  jacalin homolog [Oryza sativa (japonica cultivar-group)]                                                                                                                                                                                                                                                                                                                                                                                                                                                                                | 307   | 2E-23   |
|                       |                 |                     |                          |                     | >gb ABA94002.1  NBS-LRR resistance protein, putative [Oryza sativa (japonica cultivar-group)]                                                                                                                                                                                                                                                                                                                                                                                                                                                           | 1386  | 3E-22   |
|                       |                 |                     |                          |                     | >gb ABA97248.1  jacalin homolog [Oryza sativa (japonica cultivar-group)]gb ABB51090.1  mannose-specific jacalin-related lectin [Oryza sativa (japonica cultivar-group)]                                                                                                                                                                                                                                                                                                                                                                                 | 306   | 2E-21   |
|                       |                 |                     |                          |                     | >ref NP_908901.1  Mannose-Binding Rice Lectin [Oryza sativa (japonica cultivar-group)] gb AAK82986.1  salt-induced protein [Oryza sativa (japonica cultivar-group)] gb AAL30827.1  lectin-like protein [Oryza sativa] dbj BAB93403.1  salT gene product [Oryza sativa (japonica cultivar-group)] dbj BAB63898.1  salT gene product [Oryza sativa (japonica cultivar-group)] dbj BAA25369.1  MRL [Oryza sativa (japonica cultivar-group)]                                                                                                                | 145   | 5E-21   |
|                       |                 |                     |                          |                     | >emb CAA81059.1  salT [Oryza sativa]gb AAB23484.1  15 kda organ-specific salt-induced protein [Oryza sativa] sp P24120 SALT_ORYSA Salt stress-induced protein (Salt protein)                                                                                                                                                                                                                                                                                                                                                                            | 145   | 6E-21   |
| CD527338              | 2.49E-06        | B73<F1<Mo17         | 1.56                     | 3                   | >emb CAA55022.1  beta tubulin [Oryza sativa (japonica cultivar-group)]                                                                                                                                                                                                                                                                                                                                                                                                                                                                                  | 447   | 3E-66   |
|                       |                 |                     |                          |                     | >emb CAE52516.1  beta tubulin [Setaria viridis]                                                                                                                                                                                                                                                                                                                                                                                                                                                                                                         | 448   | 3E-66   |
|                       |                 |                     |                          |                     | >ref NP_915874.1  tubulin beta chain [Oryza sativa (japonica cultivar-group)]dbj BAB92274.1  beta-tubulin [Oryza sativa (japonica cultivar-group)]                                                                                                                                                                                                                                                                                                                                                                                                      | 447   | 3E-66   |
|                       |                 |                     |                          |                     | dbj BAA06381.1  beta-tubulin [Oryza sativa (japonica cultivar-group)] sp P45960 TBB4 ORYSA Tubulin beta-4 chain (Beta-4 tubulin)                                                                                                                                                                                                                                                                                                                                                                                                                        | 447   | 3E-66   |
|                       |                 |                     |                          |                     | >gb AAA66495.1  beta-tubulin                                                                                                                                                                                                                                                                                                                                                                                                                                                                                                                            | 447   | 3E-66   |
|                       |                 |                     |                          |                     | >sp Q41783 TBB6 MAIZE Tubulin beta-6 chain (Beta-6 tubulin)gb AAA20186.1  beta-6 tubulin                                                                                                                                                                                                                                                                                                                                                                                                                                                                | 446   | 3E-66   |
| CB605250              | 2.56E-06        | Mo17<F1<B73         | 1.82                     | 10                  | ns                                                                                                                                                                                                                                                                                                                                                                                                                                                                                                                                                      |       |         |
| CD001318              | 2.61E-06        | Mo17<F1<B73         | 1.68                     | 10                  | >gb AAO72574.1  elongation factor 1 gamma-like protein [Oryza sativa (japonica cultivar-group)]                                                                                                                                                                                                                                                                                                                                                                                                                                                         | 409   | 8E-69   |
|                       |                 |                     |                          |                     | >ref XP_464689.1  putative elongation factor 1-gamma [Oryza sativa (japonica cultivar-group)] dbj BAD17614.1  putative elongation factor 1-gamma [Oryza sativa (japonica cultivar-group)]                                                                                                                                                                                                                                                                                                                                                               | 414   | 8E-69   |
|                       |                 |                     |                          |                     | >ref XP_464690.1  Elongation factor 1-gamma [Oryza sativa (japonica cultivar-group)]dbj BAD17615.1  Elongation factor 1-gamma [Oryza sativa (japonica cultivar-group)] sp Q9ZRI7 EF1G ORYSA Elongation factor 1-gamma (EF-1-gamma) (eEF-1B gamma) dbj BAA34206.1  elongation factor 1B gamma [Oryza sativa]                                                                                                                                                                                                                                             | 418   | 1E-68   |
|                       |                 |                     |                          |                     | >gb AAO72563.1  elongation factor 1 gamma-like protein [Oryza sativa (japonica cultivar-group)]                                                                                                                                                                                                                                                                                                                                                                                                                                                         | 413   | 2E-66   |
|                       |                 |                     |                          |                     | >dbj BAD61932.1  putative elongation factor 1 gamma [Oryza sativa (japonica cultivar-group)] dbj BAD61828.1  putative elongation factor 1 gamma [Oryza sativa (japonica cultivar-group)]                                                                                                                                                                                                                                                                                                                                                                | 416   | 2E-66   |
| CB833609              | 2.68E-06        | Mo17<B73=F1         | 2.27                     | 10                  | ns                                                                                                                                                                                                                                                                                                                                                                                                                                                                                                                                                      |       |         |
| DV621316              | 2.70E-06        | Mo17<F1<B73         | 2.42                     | 10                  | ns                                                                                                                                                                                                                                                                                                                                                                                                                                                                                                                                                      |       |         |
| BM079864              | 2.91E-06        | B73<F1<Mo17         | 4.31                     | 3                   | >sp P56879 CIRB CHAPA Circulin-B (CIRB)                                                                                                                                                                                                                                                                                                                                                                                                                                                                                                                 | 31    | 8E-7    |
| DV622490              | 3.02E-06        | Mo17<B73=F1         | 1.89                     | 10                  | >gb AAV50043.1  metallothionein-like protein [Saccharum hybrid cultivar]                                                                                                                                                                                                                                                                                                                                                                                                                                                                                | 81    | 1E-6    |
| DV491214              | 3.29E-06        | Mo17<B73=F1         | 1.84                     | 10                  | >ref XP_475718.1  putative gamma-glutamyl hydrolase [Oryza sativa (japonica cultivar-group)] gb AAT01320.1  putative gamma-glutamyl hydrolase [Oryza sativa (japonica cultivar-group)]                                                                                                                                                                                                                                                                                                                                                                  | 337   | 3E-98   |
|                       |                 |                     |                          |                     | >ref NP_565186.2  catalytic/ gamma-glutamyl hydrolase [Arabidopsis thaliana]gb AAM20068.1  putative gamma glutamyl hydrolase [Arabidopsis thaliana] gb AAL49804.1  putative gamma glutamyl hydrolase [Arabidopsis thaliana] sp O65355 GGH_ARATH Gamma-glutamyl hydrolase precursor (Gamma-Glu-X carboxypeptidase) (Conjugase) (GH)                                                                                                                                                                                                                      | 347   | 4E-69   |
|                       |                 |                     |                          |                     | >gb AAC83041.1  Strong similarity to gb AF067141 gamma-glutamyl hydrolase from Arabidopsis thaliana. ESTs gb R83955, gb T45062, gb T22220, gb AA586207, gb AI099851 and gb AI00672 come from this gene pir F96815 hypothetical protein F9K20.28 [imported] - Arabidopsis thaliana                                                                                                                                                                                                                                                                       | 327   | 4E-69   |
|                       |                 |                     |                          |                     | >gb AAC33745.1  gamma-glutamyl hydrolase [Arabidopsis thaliana]pir T52030 gamma-glutamyl hydrolase [imported] - Arabidopsis thaliana                                                                                                                                                                                                                                                                                                                                                                                                                    | 326   | 2E-68   |
|                       |                 |                     |                          |                     | >ref NP_177987.1  catalytic/ gamma-glutamyl hydrolase [Arabidopsis thaliana]ref NP_974172.1  catalytic/ gamma-glutamyl hydrolase [Arabidopsis thaliana] gb AAD30570.1  putative gamma-glutamyl hydrolase [Arabidopsis thaliana]                                                                                                                                                                                                                                                                                                                         | 348   | 2E-67   |

**Table 4. Microarray analysis results, mode of gene action classification, and BLAST annotation for the 1,367 ESTs identified as differentially expressed among genotypes (15% FDR)**

| GenBank accession no. | Overall P value | Significant pattern | Fold change <sup>†</sup> | Sector <sup>‡</sup> | BLAST annotation*                                                                                                                                                                                                                                                                                                  | Score | E value |
|-----------------------|-----------------|---------------------|--------------------------|---------------------|--------------------------------------------------------------------------------------------------------------------------------------------------------------------------------------------------------------------------------------------------------------------------------------------------------------------|-------|---------|
| CB334713              | 3.32E-06        | Mo17<F1<B73         | 2.27                     | 10                  | >dbj BAD53494.1  putative Synoviolin 1 [Oryza sativa (japonica cultivar-group)]dbj BAD53976.1  putative Synoviolin 1 [Oryza sativa (japonica cultivar-group)]                                                                                                                                                      | 500   | 1E-31   |
|                       |                 |                     |                          |                     | >ref NP_188230.1  protein binding / ubiquitin-protein ligase/ zinc ion binding[Arabidopsis thaliana] gb AAY57599.1  RING finger family protein [Arabidopsis thaliana] dbj BAB02675.1  unnamed protein product [Arabidopsis thaliana] dbj BAC41836.1  putative zinc finger protein [Arabidopsis thaliana]           | 492   | 5E-26   |
|                       |                 |                     |                          |                     | >ref NP_849843.3  protein binding / ubiquitin-protein ligase/ zinc ion binding[Arabidopsis thaliana] gb AAR23700.1  At1g65040 [Arabidopsis thaliana] dbj BAD42325.1  Hrd1p like protein [Arabidopsis thaliana]                                                                                                     | 460   | 5E-24   |
|                       |                 |                     |                          |                     | >ref NP_176684.3  protein binding / ubiquitin-protein ligase/ zinc ion binding[Arabidopsis thaliana]                                                                                                                                                                                                               | 389   | 5E-24   |
|                       |                 |                     |                          |                     | >gb AAF06038.1  Contains a PF00097 Zinc finger, C3HC4 type (RING finger) domain. ESTs gb N96912 and gb AI994359 come from this gene. [Arabidopsis thaliana]                                                                                                                                                        | 496   | 3E-20   |
| CB605258              | 3.38E-06        | Mo17<F1<B73         | 1.54                     | 10                  | ns                                                                                                                                                                                                                                                                                                                 |       |         |
| CD661852              | 3.42E-06        | Mo17<F1<B73         | 1.56                     | 10                  | >ref NP_912417.1  hypothetical protein [Oryza sativa (japonica cultivar-group)]gb AAP06860.1  hypothetical protein [Oryza sativa (japonica cultivar-group)]                                                                                                                                                        | 117   | 1E-15   |
| AI615090              | 3.65E-06        | Mo17<F1<B73         | 2.14                     | 10                  | >ref NP_192563.2  unknown protein [Arabidopsis thaliana]gb AAN15541.1  unknown protein [Arabidopsis thaliana] gb AAL62398.1  unknown protein [Arabidopsis thaliana]                                                                                                                                                | 113   | 5E-9    |
|                       |                 |                     |                          |                     | >ref XP_550034.1  unknown protein [Oryza sativa (japonica cultivar-group)]dbj BAD52799.1  unknown protein [Oryza sativa (japonica cultivar-group)]                                                                                                                                                                 | 489   | 2E-13   |
| CD661780              | 3.65E-06        | Mo17<F1<B73         | 1.56                     | 10                  | >ref XP_550033.1  unknown protein [Oryza sativa (japonica cultivar-group)]dbj BAD52798.1  unknown protein [Oryza sativa (japonica cultivar-group)]                                                                                                                                                                 | 526   | 9E-9    |
| CB334529              | 3.75E-06        | B73<F1=Mo17         | 1.49                     | 3                   | >emb CAA55022.1  beta tubulin [Oryza sativa (japonica cultivar-group)]                                                                                                                                                                                                                                             | 447   | 2E-80   |
|                       |                 |                     |                          |                     | >emb CAE52516.1  beta tubulin [Setaria viridis]                                                                                                                                                                                                                                                                    | 448   | 2E-80   |
|                       |                 |                     |                          |                     | >ref NP_915874.1  tubulin beta chain [Oryza sativa (japonica cultivar-group)]dbj BAB92274.1  beta-tubulin [Oryza sativa (japonica cultivar-group)] dbj BAA06381.1  beta-tubulin [Oryza sativa (japonica cultivar-group)] sp P45960 TBB4 ORYSA Tubulin beta-4 chain (Beta-4 tubulin)                                | 447   | 2E-80   |
|                       |                 |                     |                          |                     | >gb AAA66495.1  beta-tubulin                                                                                                                                                                                                                                                                                       | 447   | 2E-80   |
|                       |                 |                     |                          |                     | >sp Q41783 TBB6 MAIZE Tubulin beta-6 chain (Beta-6 tubulin)gb AAA20186.1  beta-6 tubulin                                                                                                                                                                                                                           | 446   | 2E-80   |
| CD670393              | 3.76E-06        | Mo17<B73=F1         | 3.47                     | 10                  | >ref XP_480212.1  WD-40 repeat protein-like [Oryza sativa (japonica cultivar-group)]dbj BAC99788.1  WD-40 repeat protein-like [Oryza sativa (japonica cultivar-group)]                                                                                                                                             | 1150  | 8E-7    |
| BG840776              | 3.77E-06        | Mo17<F1<B73         | 2.01                     | 10                  | >gb AAM22751.1  one helix protein [Deschampsia antarctica]                                                                                                                                                                                                                                                         | 110   | 2E-24   |
|                       |                 |                     |                          |                     | >gb AAP23938.1  one helix protein [Ipomoea nil]                                                                                                                                                                                                                                                                    | 116   | 2E-24   |
|                       |                 |                     |                          |                     | >gb ABA98252.1  one helix protein [Oryza sativa (japonica cultivar-group)]                                                                                                                                                                                                                                         | 113   | 4E-24   |
|                       |                 |                     |                          |                     | >gb AAM62880.1  one helix protein OHP [Arabidopsis thaliana]                                                                                                                                                                                                                                                       | 110   | 5E-23   |
|                       |                 |                     |                          |                     | >ref NP_195832.1  OHP (ONE HELIX PROTEIN) [Arabidopsis thaliana]emb CAB82985.1  one helix protein (OHP) [Arabidopsis thaliana] gb AAM10146.1  one helix protein (OHP) [Arabidopsis thaliana] gb AAL32924.1  one helix protein (OHP) [Arabidopsis thaliana] gb AAC25108.1  one helix protein [Arabidopsis thaliana] | 110   | 5E-23   |
| CD568360              | 3.89E-06        | B73<F1<Mo17         | 2.28                     | 3                   | >gb AAV67827.1  unknown protein [Oryza sativa (japonica cultivar-group)]                                                                                                                                                                                                                                           | 400   | 1E-35   |
|                       |                 |                     |                          |                     | >ref XP_475819.1  unknown protein [Oryza sativa (japonica cultivar-group)]                                                                                                                                                                                                                                         | 358   | 6E-27   |
|                       |                 |                     |                          |                     | >ref XP_465099.1  hydrolase, alpha/beta fold family protein-like [Oryza sativa(japonica cultivar-group)] dbj BAD23358.1  hydrolase, alpha/beta fold family protein-like [Oryza sativa (japonica cultivar-group)]                                                                                                   | 289   | 9E-10   |
|                       |                 |                     |                          |                     | >dbj BAA97145.1  unnamed protein product [Arabidopsis thaliana]                                                                                                                                                                                                                                                    | 438   | 3E-9    |
|                       |                 |                     |                          |                     | >ref NP_974930.1  catalytic/ hydrolase [Arabidopsis thaliana]ref NP_001032065.1  catalytic/ hydrolase [Arabidopsis thaliana]                                                                                                                                                                                       | 396   | 3E-9    |
| CD527368              | 4.00E-06        | B73<F1=Mo17         | 1.61                     | 3                   | ns                                                                                                                                                                                                                                                                                                                 |       |         |
| BG842228              | 4.03E-06        | Mo17<F1<B73         | 2.1                      | 10                  | >ref XP_479171.1  putative alanine aminotransferase [Oryza sativa (japonica cultivar-group)] dbj BAC79995.1  putative alanine aminotransferase [Oryza sativa (japonica cultivar-group)] dbj BAC79866.1  putative alanine aminotransferase [Oryza sativa (japonica cultivar-group)]                                 | 486   | 2E-21   |
|                       |                 |                     |                          |                     | >gb AAV64237.1  putative alanine aminotransferase [Zea mays]                                                                                                                                                                                                                                                       | 516   | 4E-21   |
|                       |                 |                     |                          |                     | >gb AAV64199.1  putative alanine aminotransferase [Zea mays]                                                                                                                                                                                                                                                       | 516   | 4E-21   |
|                       |                 |                     |                          |                     | >emb CAE54279.1  putative alanine aminotransferase [Triticum aestivum]                                                                                                                                                                                                                                             | 113   | 7E-20   |
|                       |                 |                     |                          |                     | >emb CAA49199.1  alanine aminotransferase [Panicum miliaecum]sp P34106 ALA2_PANMI Alanine aminotransferase 2 (GPT) (Glutamic--pyruvic transaminase 2) (Glutamic--alanine transaminase 2) (ALAAAT-2)                                                                                                                | 482   | 1E-18   |
| BM075132              | 4.40E-06        | Mo17<F1<B73         | 2.18                     | 9                   | >gb AAW48295.1  pore-forming toxin-like protein Hfr-2 [Triticum aestivum]                                                                                                                                                                                                                                          | 492   | 3E-9    |
| CD651747              | 4.71E-06        | Mo17<F1<B73         | 1.61                     | 10                  | ns                                                                                                                                                                                                                                                                                                                 |       |         |
| BM340381              | 4.80E-06        | Mo17<B73=F1         | 10.73                    | 10                  | ns                                                                                                                                                                                                                                                                                                                 |       |         |
| CD484960              | 5.53E-06        | Mo17<B73<F1         | 1.66                     | 12                  | >gb AAF71261.2  beta-glucosidase aggregating factor precursor [Zea mays]                                                                                                                                                                                                                                           | 306   | 2E-37   |
|                       |                 |                     |                          |                     | >gb ABA96667.1  jacalin homolog [Oryza sativa (japonica cultivar-group)]                                                                                                                                                                                                                                           | 307   | 6E-35   |
|                       |                 |                     |                          |                     | >gb AAR20919.1  jasmonate-induced protein [Triticum aestivum]                                                                                                                                                                                                                                                      | 304   | 2E-34   |
|                       |                 |                     |                          |                     | >gb ABA97248.1  jacalin homolog [Oryza sativa (japonica cultivar-group)]gb ABB51090.1  mannose-specific jacalin-related lectin [Oryza sativa (japonica cultivar-group)]                                                                                                                                            | 306   | 3E-34   |
|                       |                 |                     |                          |                     | >gb AAB72098.1  32 kDa protein [Hordeum vulgare]                                                                                                                                                                                                                                                                   | 306   | 5E-34   |



**Table 4. Microarray analysis results, mode of gene action classification, and BLAST annotation for the 1,367 ESTs identified as differentially expressed among genotypes (15% FDR)**

| GenBank accession no.                                                                                                                                | Overall P value | Significant pattern | Fold change <sup>†</sup> | Sector <sup>‡</sup> | BLAST annotation*                                                                                                                                                                                                                                                                                                                                                                                                                                            | Score    | E value     |      |    |                                                                                                                                                       |     |       |
|------------------------------------------------------------------------------------------------------------------------------------------------------|-----------------|---------------------|--------------------------|---------------------|--------------------------------------------------------------------------------------------------------------------------------------------------------------------------------------------------------------------------------------------------------------------------------------------------------------------------------------------------------------------------------------------------------------------------------------------------------------|----------|-------------|------|----|-------------------------------------------------------------------------------------------------------------------------------------------------------|-----|-------|
| CB603943                                                                                                                                             | 5.73E-06        | Mo17<B73=F1         | 1.65                     | 10                  | >ref XP_493844.1  putative glutathione S-transferase [Oryza sativa (japonica cultivar-group)] gb AAN64482.1  putative glutathione S-transferase [Oryza sativa (japonica cultivar-group)]                                                                                                                                                                                                                                                                     | 244      | 2E-50       |      |    |                                                                                                                                                       |     |       |
|                                                                                                                                                      |                 |                     |                          |                     | >emb CAA76758.1  putative In2.1 protein [Triticum aestivum]                                                                                                                                                                                                                                                                                                                                                                                                  | 243      | 1E-41       |      |    |                                                                                                                                                       |     |       |
|                                                                                                                                                      |                 |                     |                          |                     | >ref XP_493845.1  putative glutathione S-transferase [Oryza sativa (japonica cultivar-group)] gb AAN64486.1  putative glutathione S-transferase [Oryza sativa (japonica cultivar-group)]                                                                                                                                                                                                                                                                     | 255      | 1E-40       |      |    |                                                                                                                                                       |     |       |
|                                                                                                                                                      |                 |                     |                          |                     | >gb AAF70831.1  XIG [Oryza sativa]                                                                                                                                                                                                                                                                                                                                                                                                                           | 243      | 1E-40       |      |    |                                                                                                                                                       |     |       |
|                                                                                                                                                      |                 |                     |                          |                     | >emb CAA41447.1  In2-1 [Zea mays]sp P49248 IN21 MAIZE IN2-1 protein                                                                                                                                                                                                                                                                                                                                                                                          | 243      | 1E-39       |      |    |                                                                                                                                                       |     |       |
| BM073594                                                                                                                                             | 6.07E-06        | B73<F1=Mo17         | 2.04                     | 3                   | >ref NP_915626.1  putative uricase [Oryza sativa (japonica cultivar-group)]dbj BAC01199.1  putative uricase [Oryza sativa (japonica cultivar-group)]                                                                                                                                                                                                                                                                                                         | 307      | 3E-68       |      |    |                                                                                                                                                       |     |       |
|                                                                                                                                                      |                 |                     |                          |                     | dbj BAB63819.1  putative uricase [Oryza sativa (japonica cultivar-group)]                                                                                                                                                                                                                                                                                                                                                                                    | 309      | 1E-52       |      |    |                                                                                                                                                       |     |       |
|                                                                                                                                                      |                 |                     |                          |                     | >gb AAA33994.1  nodulin 35                                                                                                                                                                                                                                                                                                                                                                                                                                   | 309      | 4E-52       |      |    |                                                                                                                                                       |     |       |
|                                                                                                                                                      |                 |                     |                          |                     | >prf 1109273A  nodulin 35                                                                                                                                                                                                                                                                                                                                                                                                                                    | 309      | 7E-52       |      |    |                                                                                                                                                       |     |       |
|                                                                                                                                                      |                 |                     |                          |                     | >sp O04104 URID SOYBN Uricase II isozyme 2 (Urate oxidase) (Nodulin 35) (N-35)(Non-symbiotic uricase) dbj BAA19672.1  nodulin 35 [Glycine max]                                                                                                                                                                                                                                                                                                               | 308      | 2E-51       |      |    |                                                                                                                                                       |     |       |
| CD484869                                                                                                                                             | 6.13E-06        | Mo17<B73=F1         | 1.78                     | 10                  | >gb AAV50043.1  metallothionein-like protein [Saccharum hybrid cultivar]                                                                                                                                                                                                                                                                                                                                                                                     | 81       | 3E-10       |      |    |                                                                                                                                                       |     |       |
|                                                                                                                                                      |                 |                     |                          |                     | >gb AAS88721.1  metallothionein-like protein [Cynodon dactylon]                                                                                                                                                                                                                                                                                                                                                                                              | 81       | 5E-9        |      |    |                                                                                                                                                       |     |       |
|                                                                                                                                                      |                 |                     |                          |                     | >emb CAC40757.1  putative metallothionein-like protein type 2B [Atropa belladonna]                                                                                                                                                                                                                                                                                                                                                                           | 81       | 1E-8        |      |    |                                                                                                                                                       |     |       |
|                                                                                                                                                      |                 |                     |                          |                     | >ref NP_909265.1  putative metallothionein-like protein [Oryza sativa (japonica cultivar-group)] dbj BAD52374.1  metallothionein [Oryza rufipogon]                                                                                                                                                                                                                                                                                                           |          |             |      |    |                                                                                                                                                       |     |       |
|                                                                                                                                                      |                 |                     |                          |                     | dbj BAD52373.1  metallothionein [Oryza rufipogon] dbj BAD52372.1  metallothionein [Oryza rufipogon] dbj BAD52371.1  metallothionein [Oryza rufipogon]                                                                                                                                                                                                                                                                                                        |          |             |      |    |                                                                                                                                                       |     |       |
|                                                                                                                                                      |                 |                     |                          |                     | dbj BAD52370.1  metallothionein [Oryza rufipogon] dbj BAD52369.1  metallothionein [Oryza rufipogon] dbj BAD52368.1  metallothionein [Oryza rufipogon]                                                                                                                                                                                                                                                                                                        |          |             |      |    |                                                                                                                                                       |     |       |
|                                                                                                                                                      |                 |                     |                          |                     | dbj BAD52367.1  metallothionein [Oryza rufipogon] dbj BAD52366.1  metallothionein [Oryza rufipogon] dbj BAD52365.1  metallothionein [Oryza rufipogon]                                                                                                                                                                                                                                                                                                        |          |             |      |    |                                                                                                                                                       |     |       |
|                                                                                                                                                      |                 |                     |                          |                     | dbj BAD52364.1  metallothionein [Oryza rufipogon] dbj BAD52363.1  metallothionein [Oryza rufipogon] dbj BAD52362.1  metallothionein [Oryza rufipogon]                                                                                                                                                                                                                                                                                                        |          |             |      |    |                                                                                                                                                       |     |       |
|                                                                                                                                                      |                 |                     |                          |                     | dbj BAB44010.1  putative metallothionein-like protein [Oryza sativa (japonica cultivar-group)] dbj BAA14038.1  metallothionein-like protein [Oryza sativa]                                                                                                                                                                                                                                                                                                   |          |             |      |    |                                                                                                                                                       |     |       |
|                                                                                                                                                      |                 |                     |                          |                     | sp P94029 MT21 ORYSA Metallothionein-like protein type 2 gb AAC49627.1  metallothionein-like type 2                                                                                                                                                                                                                                                                                                                                                          | 82       | 3E-8        |      |    |                                                                                                                                                       |     |       |
|                                                                                                                                                      |                 |                     |                          |                     | >gb AAP80616.1  metallothionein [Triticum aestivum]                                                                                                                                                                                                                                                                                                                                                                                                          | 114      | 7E-8        |      |    |                                                                                                                                                       |     |       |
|                                                                                                                                                      |                 |                     |                          |                     | >dbj BAD68857.1  unknown protein [Oryza sativa (japonica cultivar-group)]dbj BAD68744.1  unknown protein [Oryza sativa (japonica cultivar-group)]                                                                                                                                                                                                                                                                                                            | 58       | 2E-12       |      |    |                                                                                                                                                       |     |       |
|                                                                                                                                                      |                 |                     |                          |                     | >ref NP_917167.1  P0039G05.22 [Oryza sativa (japonica cultivar-group)]                                                                                                                                                                                                                                                                                                                                                                                       | 54       | 1E-11       |      |    |                                                                                                                                                       |     |       |
|                                                                                                                                                      |                 |                     |                          |                     | DV622257                                                                                                                                                                                                                                                                                                                                                                                                                                                     | 6.54E-06 | B73<F1<Mo17 | 1.5  | 3  | >ref XP_479905.1  unknown protein [Oryza sativa (japonica cultivar-group)]dbj BAD08860.1  unknown protein [Oryza sativa (japonica cultivar-group)]    | 184 | 5E-31 |
|                                                                                                                                                      |                 |                     |                          |                     |                                                                                                                                                                                                                                                                                                                                                                                                                                                              |          |             |      |    | >ref NP_176927.1  unknown protein [Arabidopsis thaliana]gb AAM63870.1  unknown [Arabidopsis thaliana] gb AAG28897.1  F12A21.27 [Arabidopsis thaliana] | 163 | 2E-22 |
| >gb AAM63820.1  unknown [Arabidopsis thaliana]                                                                                                       | 168             | 6E-22               |                          |                     |                                                                                                                                                                                                                                                                                                                                                                                                                                                              |          |             |      |    |                                                                                                                                                       |     |       |
| >ref NP_564215.1  unknown protein [Arabidopsis thaliana]                                                                                             | 168             | 6E-22               |                          |                     |                                                                                                                                                                                                                                                                                                                                                                                                                                                              |          |             |      |    |                                                                                                                                                       |     |       |
| >dbj BAD82112.1  unknown protein [Oryza sativa (japonica cultivar-group)]dbj BAD82771.1  unknown protein [Oryza sativa (japonica cultivar-group)]    | 171             | 4E-20               |                          |                     |                                                                                                                                                                                                                                                                                                                                                                                                                                                              |          |             |      |    |                                                                                                                                                       |     |       |
| BM347617                                                                                                                                             | 6.84E-06        | Mo17<F1<B73         | 3.37                     | 10                  | ns                                                                                                                                                                                                                                                                                                                                                                                                                                                           |          |             |      |    |                                                                                                                                                       |     |       |
| CB281986                                                                                                                                             | 7.07E-06        | Mo17<F1<B73         | 1.78                     | 10                  | >gb AAV59386.1  putative nucleoside diphosphate kinase [Oryza sativa (japonica cultivar-group)] ref XP_476035.1  putative nucleoside diphosphate kinase [Oryza sativa (japonica cultivar-group)] gb AAW57792.1  putative nucleoside diphosphate kinase [Oryza sativa (japonica cultivar-group)]                                                                                                                                                              | 239      | 7E-31       |      |    |                                                                                                                                                       |     |       |
|                                                                                                                                                      |                 |                     |                          |                     | >gb AAF08537.1  nucleoside diphosphate kinase [Pisum sativum]                                                                                                                                                                                                                                                                                                                                                                                                | 233      | 6E-20       |      |    |                                                                                                                                                       |     |       |
|                                                                                                                                                      |                 |                     |                          |                     | >gb AAM65336.1  nucleoside diphosphate kinase 3 (ndpk3) [Arabidopsis thaliana]                                                                                                                                                                                                                                                                                                                                                                               | 237      | 6E-19       |      |    |                                                                                                                                                       |     |       |
|                                                                                                                                                      |                 |                     |                          |                     | >ref NP_567690.1  ATP binding / nucleoside diphosphate kinase [Arabidopsis thaliana]emb CAB81308.1  hypothetical protein [Arabidopsis thaliana]                                                                                                                                                                                                                                                                                                              |          |             |      |    |                                                                                                                                                       |     |       |
|                                                                                                                                                      |                 |                     |                          |                     | emb CAB43890.1  hypothetical protein [Arabidopsis thaliana] dbj BAC42534.1  unknown protein [Arabidopsis thaliana] dbj BAB19789.1  nucleoside diphosphate kinase 4 [Arabidopsis thaliana] sp Q8LAH8 NDK4_ARATH Nucleoside diphosphate kinase IV, chloroplast/mitochondrial precursor (NDK IV) (NDP kinase IV)                                                                                                                                                | 237      | 2E-18       |      |    |                                                                                                                                                       |     |       |
|                                                                                                                                                      |                 |                     |                          |                     | (NDPK IV) (Nucleoside diphosphate kinase 4)                                                                                                                                                                                                                                                                                                                                                                                                                  |          |             |      |    |                                                                                                                                                       |     |       |
|                                                                                                                                                      |                 |                     |                          |                     | >ref NP_192839.1  NDPK3 (NUCLEOSIDE DIPHOSPHATE KINASE 3); ATP binding / nucleosidediphosphate kinase [Arabidopsis thaliana] emb CAB81202.1  nucleoside diphosphate kinase 3 (ndpk3) [Arabidopsis thaliana] emb CAB40069.1  nucleoside diphosphate kinase 3 (ndpk3) [Arabidopsis thaliana] gb AAL33810.1  putative nucleoside diphosphate kinase 3 [Arabidopsis thaliana] gb AAK59688.1  putative nucleoside diphosphate kinase ndpk3 [Arabidopsis thaliana] |          |             |      |    |                                                                                                                                                       |     |       |
|                                                                                                                                                      |                 |                     |                          |                     | sp O49203 NDK3_ARATH Nucleoside diphosphate kinase III, chloroplast/mitochondrial precursor (NDK III) (NDP kinase III) (NDPK III) gb AAC33956.1  contains similarity to nucleoside diphosphate kinases (Pfam: NDK.hmm, score: 301.12) [Arabidopsis thaliana] gb AAC00512.1  nucleoside diphosphate kinase 3 [Arabidopsis thaliana]                                                                                                                           | 238      | 3E-16       |      |    |                                                                                                                                                       |     |       |
|                                                                                                                                                      |                 |                     |                          |                     | ns                                                                                                                                                                                                                                                                                                                                                                                                                                                           |          |             |      |    |                                                                                                                                                       |     |       |
|                                                                                                                                                      |                 |                     |                          |                     | BM339765                                                                                                                                                                                                                                                                                                                                                                                                                                                     | 7.37E-06 | Mo17<B73=F1 | 8.01 | 10 | ns                                                                                                                                                    |     |       |
| >ref XP_470990.1  OSJNBb0085F13.14 [Oryza sativa (japonica cultivar-group)]emb CAE02767.2  OSJNBb0085F13.14 [Oryza sativa (japonica cultivar-group)] | 623             | 8E-74               |                          |                     |                                                                                                                                                                                                                                                                                                                                                                                                                                                              |          |             |      |    |                                                                                                                                                       |     |       |
| >emb CAA40137.1  arginine decarboxylase [Avena sativa]sp P22220 SPE1 AVESA Arginine decarboxylase (ARGDC) (ADC)                                      | 607             | 3E-67               |                          |                     |                                                                                                                                                                                                                                                                                                                                                                                                                                                              |          |             |      |    |                                                                                                                                                       |     |       |
| >emb CAB64599.1  arginine decarboxylase 1 [Datura stramonium]                                                                                        | 724             | 4E-35               |                          |                     |                                                                                                                                                                                                                                                                                                                                                                                                                                                              |          |             |      |    |                                                                                                                                                       |     |       |
| >emb CAA85773.1  arginine decarboxylase [Pisum sativum]sp Q43075 SPE1 PEA Arginine decarboxylase (ARGDC) (ADC)                                       | 728             | 7E-35               |                          |                     |                                                                                                                                                                                                                                                                                                                                                                                                                                                              |          |             |      |    |                                                                                                                                                       |     |       |
| >dbj BAE71301.1  putative arginine decarboxylase [Trifolium pratense]                                                                                | 729             | 7E-35               |                          |                     |                                                                                                                                                                                                                                                                                                                                                                                                                                                              |          |             |      |    |                                                                                                                                                       |     |       |
| CB604486                                                                                                                                             | 7.96E-06        | Mo17<F1<B73         | 2.45                     | 10                  | >ref NP_912448.1  Unknown protein [Oryza sativa (japonica cultivar-group)]gb AAO15289.1  Unknown protein [Oryza sativa (japonica cultivar-group)]                                                                                                                                                                                                                                                                                                            | 240      | 5E-81       |      |    |                                                                                                                                                       |     |       |

**Table 4. Microarray analysis results, mode of gene action classification, and BLAST annotation for the 1,367 ESTs identified as differentially expressed among genotypes (15% FDR)**

| GenBank accession no. | Overall P value | Significant pattern | Fold change <sup>†</sup> | Sector <sup>‡</sup> | BLAST annotation*                                                                                                                                                                                                                                                                                                                                       | Score | E value |
|-----------------------|-----------------|---------------------|--------------------------|---------------------|---------------------------------------------------------------------------------------------------------------------------------------------------------------------------------------------------------------------------------------------------------------------------------------------------------------------------------------------------------|-------|---------|
|                       |                 |                     |                          |                     | >ref NP_568767.1  oxidoreductase, acting on paired donors, with incorporation or reduction of molecular oxygen, 2-oxoglutarate as one donor, and incorporation of one atom each of oxygen into both donors [Arabidopsis thaliana] gb AAM63324.1  unknown [Arabidopsis thaliana]                                                                         | 227   | 6E-58   |
|                       |                 |                     |                          |                     | >dbj BAA97223.1  unnamed protein product [Arabidopsis thaliana]                                                                                                                                                                                                                                                                                         | 250   | 6E-58   |
|                       |                 |                     |                          |                     | >gb AAO42850.1  At5g51880 [Arabidopsis thaliana]                                                                                                                                                                                                                                                                                                        | 227   | 1E-57   |
|                       |                 |                     |                          |                     | >ref XP_452140.1  unnamed protein product [Kluyveromyces lactis]emb CAH02533.1  unnamed protein product [Kluyveromyces lactis NRRL Y-1140]                                                                                                                                                                                                              | 227   | 2E-23   |
| DV621428              | 8.08E-06        | B73<F1=Mo17         | 2.14                     | 3                   | >dbj BAD38037.1  F-box protein-like [Oryza sativa (japonica cultivar-group)]dbj BAD38264.1  F-box protein-like [Oryza sativa (japonica cultivar-group)]                                                                                                                                                                                                 | 428   | 2E-11   |
|                       |                 |                     |                          |                     | >ref XP_482875.1  F-box protein family-like [Oryza sativa (japonica cultivar-group)]dbj BAD09570.1  F-box protein family-like [Oryza sativa (japonica cultivar-group)]                                                                                                                                                                                  | 394   | 3E-9    |
|                       |                 |                     |                          |                     | >ref NP_172548.2  unknown protein [Arabidopsis thaliana]gb AAU95433.1  At1g10780 [Arabidopsis thaliana] gb AAT71950.1  At1g10780 [Arabidopsis thaliana]                                                                                                                                                                                                 | 418   | 3E-6    |
|                       |                 |                     |                          |                     | gb AAD31335.1  T16B5.8 [Arabidopsis thaliana]                                                                                                                                                                                                                                                                                                           |       |         |
| DV621711              | 8.54E-06        | B73<F1=Mo17         | 1.57                     | 3                   | >ref XP_474220.1  OSJNBa0084K01.4 [Oryza sativa (japonica cultivar-group)]emb CAE04832.1  OSJNBa0084K01.4 [Oryza sativa (japonica cultivar-group)]                                                                                                                                                                                                      | 176   | 5E-61   |
|                       |                 |                     |                          |                     | >gb AAM67107.1  transcription co-activator-like protein [Arabidopsis thaliana]                                                                                                                                                                                                                                                                          | 168   | 2E-47   |
|                       |                 |                     |                          |                     | >gb AAV84520.1  At5g03220 [Arabidopsis thaliana]ref NP_195942.1  unknown protein [Arabidopsis thaliana] emb CAB86089.1  putative protein [Arabidopsis thaliana] gb AAG40347.1  AT5g03220 [Arabidopsis thaliana] dbj BAC42181.1  unknown protein [Arabidopsis thaliana] dbj BAB08382.1  transcriptional co-activator-like protein [Arabidopsis thaliana] | 168   | 6E-47   |
|                       |                 |                     |                          |                     | >emb CAB83310.1  transcriptional co-activator-like protein [Arabidopsis thaliana]gb AAM19916.1  At5g03505/C320EPL23M [Arabidopsis thaliana]                                                                                                                                                                                                             |       |         |
|                       |                 |                     |                          |                     | gb AAL91616.1  At5g03505/C320EPL23M [Arabidopsis thaliana]                                                                                                                                                                                                                                                                                              | 168   | 8E-47   |
|                       |                 |                     |                          |                     | >ref NP_195970.1  unknown protein [Arabidopsis thaliana]                                                                                                                                                                                                                                                                                                | 443   | 4E-46   |
| CD651118              | 8.78E-06        | Mo17<B73=F1         | 1.89                     | 11                  | >ref XP_550093.1  unknown protein [Oryza sativa (japonica cultivar-group)]dbj BAD61477.1  unknown protein [Oryza sativa (japonica cultivar-group)]                                                                                                                                                                                                      | 436   | 5E-91   |
|                       |                 |                     |                          |                     | dbj BAD61068.1  unknown protein [Oryza sativa (japonica cultivar-group)]                                                                                                                                                                                                                                                                                |       |         |
|                       |                 |                     |                          |                     | >ref NP_912342.1  putative sulfolipid synthase [Oryza sativa (japonica cultivar-group)] gb AAP06834.1  putative sulfolipid synthase [Oryza sativa (japonica cultivar-group)]                                                                                                                                                                            | 415   | 4E-79   |
|                       |                 |                     |                          |                     | >ref XP_476339.1  putative sulfolipid synthase [Oryza sativa (japonica cultivar-group)] dbj BAD31817.1  putative sulfolipid synthase [Oryza sativa (japonica cultivar-group)]                                                                                                                                                                           | 479   | 1E-76   |
|                       |                 |                     |                          |                     | gb AAK76635.1  unknown protein [Arabidopsis thaliana]                                                                                                                                                                                                                                                                                                   | 434   | 5E-75   |
|                       |                 |                     |                          |                     | >ref NP_568085.2  SQD2 (SULFOQUINOVOSYLDIACYLGLYCEROL 2); UDP-sulfoquinovose:DAGsulfoquinovosyltransferase/ transferase, transferring glycosyl groups [Arabidopsis thaliana] gb AAM18913.1  sulfolipid synthase [Arabidopsis thaliana] gb AAO64198.1  unknown protein [Arabidopsis thaliana]                                                            | 510   | 5E-75   |
| BG842033              | 9.59E-06        | Mo17<F1<B73         | 2                        | 10                  | >gb AAC37357.1  catalasesp P18123 CATA3 MAIZE Catalase isozyme 3                                                                                                                                                                                                                                                                                        | 496   | 5E-50   |
|                       |                 |                     |                          |                     | >emb CAA31057.1  unnamed protein product [Zea mays]                                                                                                                                                                                                                                                                                                     | 495   | 1E-39   |
|                       |                 |                     |                          |                     | >gb AAA33441.1  catalase isozyme 3 (EC 1.11.1.6)                                                                                                                                                                                                                                                                                                        | 495   | 1E-39   |
|                       |                 |                     |                          |                     | >emb CAH61266.1  catalase [Secale cereale]                                                                                                                                                                                                                                                                                                              | 494   | 6E-37   |
|                       |                 |                     |                          |                     | >gb AAC17730.1  catalase 2 [Hordeum vulgare]                                                                                                                                                                                                                                                                                                            | 394   | 1E-36   |
| AW066844              | 9.82E-06        | Mo17<F1<B73         | 2.09                     | 10                  | ns                                                                                                                                                                                                                                                                                                                                                      |       |         |
| BM074414              | 9.91E-06        | Mo17<F1<B73         | 1.77                     | 10                  | ns                                                                                                                                                                                                                                                                                                                                                      |       |         |
| BG841239              | 1.01E-05        | Mo17<F1<B73         | 17.07                    | 10                  | >gb AAV44016.1  unknown protein [Oryza sativa (japonica cultivar-group)]                                                                                                                                                                                                                                                                                | 468   | 4E-76   |
|                       |                 |                     |                          |                     | >ref NP_181336.1  unknown protein [Arabidopsis thaliana]gb AAM45095.1  unknown protein [Arabidopsis thaliana] gb AAL87350.1  unknown protein [Arabidopsis thaliana] gb AAD32771.1  unknown protein [Arabidopsis thaliana]                                                                                                                               | 419   | 9E-56   |
|                       |                 |                     |                          |                     | >ref XP_684280.1  PREDICTED: hypothetical protein XP_679188 [Danio rerio]                                                                                                                                                                                                                                                                               | 406   | 1E-9    |
|                       |                 |                     |                          |                     | >ref XP_688439.1  PREDICTED: hypothetical protein XP_683347 [Danio rerio]                                                                                                                                                                                                                                                                               | 273   | 1E-9    |
|                       |                 |                     |                          |                     | >ref XP_684100.1  PREDICTED: hypothetical protein XP_679008 [Danio rerio]                                                                                                                                                                                                                                                                               | 382   | 4E-9    |
| CD001440              | 1.04E-05        | Mo17<F1<B73         | 1.99                     | 10                  | >gb AAL76334.1  putative G-box binding protein [Oryza sativa]dbj BAD45657.1  G-box binding protein-like [Oryza sativa (japonica cultivar-group)]                                                                                                                                                                                                        | 89    | 1E-39   |
|                       |                 |                     |                          |                     | gb AAB65433.1  HvB12D homolog [Oryza sativa]                                                                                                                                                                                                                                                                                                            |       |         |
|                       |                 |                     |                          |                     | >emb CAA70936.1  B12Dg1 [Hordeum vulgare subsp. vulgare]emb CAA54065.1  HvB12D [Hordeum vulgare subsp. vulgare]                                                                                                                                                                                                                                         | 87    | 1E-35   |
|                       |                 |                     |                          |                     | >gb AAD22104.1  B12D protein [Ipomoea batatas]                                                                                                                                                                                                                                                                                                          | 90    | 3E-33   |
|                       |                 |                     |                          |                     | >ref NP_190397.1  unknown protein [Arabidopsis thaliana]emb CAB51061.1  B12D-like protein [Arabidopsis thaliana] gb AAL91215.1  B12D-like protein [Arabidopsis thaliana] gb AAN65070.1  B12D-like protein [Arabidopsis thaliana] pir [T13003 hypothetical protein T24C20.20 - Arabidopsis thaliana]                                                     | 88    | 9E-29   |
|                       |                 |                     |                          |                     | >ref XP_477421.1  putative B12D protein [Oryza sativa (japonica cultivar-group)]dbj BAC84633.1  putative B12D protein [Oryza sativa (japonica cultivar-group)]                                                                                                                                                                                          |       |         |
|                       |                 |                     |                          |                     | dbj BAD31625.1  putative B12D protein [Oryza sativa (japonica cultivar-group)]                                                                                                                                                                                                                                                                          | 98    | 1E-27   |
| DV490389              | 1.05E-05        | Mo17<F1<B73         | 1.8                      | 10                  | >gb AAX11351.1  cathepsin B-like cysteine protease [Oryza sativa (japonica cultivar-group)]                                                                                                                                                                                                                                                             | 358   | 3E-90   |
|                       |                 |                     |                          |                     | >emb CAC83720.1  cathepsin B [Hordeum vulgare subsp. vulgare]                                                                                                                                                                                                                                                                                           | 344   | 2E-88   |
|                       |                 |                     |                          |                     | >emb CAA46810.1  cathepsin B [Triticum aestivum]                                                                                                                                                                                                                                                                                                        | 305   | 4E-88   |
|                       |                 |                     |                          |                     | >emb CAA46811.1  cathepsin B [Triticum aestivum]                                                                                                                                                                                                                                                                                                        | 353   | 1E-81   |
|                       |                 |                     |                          |                     | >emb CAA57522.1  cathepsin B-like cysteine proteinase [Nicotiana rustica]                                                                                                                                                                                                                                                                               | 356   | 8E-76   |

**Table 4. Microarray analysis results, mode of gene action classification, and BLAST annotation for the 1,367 ESTs identified as differentially expressed among genotypes (15% FDR)**

| GenBank accession no. | Overall P value | Significant pattern | Fold change <sup>†</sup> | Sector <sup>‡</sup> | BLAST annotation*                                                                                                                                                                                                                                                                                                                                                                                                                                                                                                                                                                                                                                                                                                                                                                                                                                                                                                                                                                                                                                                                                           | Score | E value |
|-----------------------|-----------------|---------------------|--------------------------|---------------------|-------------------------------------------------------------------------------------------------------------------------------------------------------------------------------------------------------------------------------------------------------------------------------------------------------------------------------------------------------------------------------------------------------------------------------------------------------------------------------------------------------------------------------------------------------------------------------------------------------------------------------------------------------------------------------------------------------------------------------------------------------------------------------------------------------------------------------------------------------------------------------------------------------------------------------------------------------------------------------------------------------------------------------------------------------------------------------------------------------------|-------|---------|
| CD001771              | 1.26E-05        | B73<F1<Mo17         | 1.45                     | 4                   | >emb CAA33620.1  GAPDH [Zea mays]sp P08735 G3PC MAIZE Glyceraldehyde-3-phosphate dehydrogenase, cytosolic 1                                                                                                                                                                                                                                                                                                                                                                                                                                                                                                                                                                                                                                                                                                                                                                                                                                                                                                                                                                                                 | 337   | 1E-68   |
|                       |                 |                     |                          |                     | >emb CAA30151.1  unnamed protein product [Zea mays]                                                                                                                                                                                                                                                                                                                                                                                                                                                                                                                                                                                                                                                                                                                                                                                                                                                                                                                                                                                                                                                         | 337   | 1E-68   |
|                       |                 |                     |                          |                     | >emb CAA51676.1  glyceraldehyde 3-phosphate dehydrogenase (phosphorylating) [Zeamays] sp Q09054 G3PD_MAIZE Glyceraldehyde-3-phosphate dehydrogenase, cytosolic 2 gb AAA87880.1  glyceraldehyde-3-phosphate dehydrogenase gb AAA87578.1  cytosolic glyceroldehyde-3-phosphate dehydrogenase GAPC2                                                                                                                                                                                                                                                                                                                                                                                                                                                                                                                                                                                                                                                                                                                                                                                                            | 337   | 9E-67   |
|                       |                 |                     |                          |                     | >gb AAQ55397.1  glyceraldehyde-3-phosphate dehydrogenase [Hordeum vulgare subsp.spontaneum] gb AAQ55396.1  glyceraldehyde-3-phosphate dehydrogenase [Hordeum vulgare subsp. spontaneum] gb AAQ55394.1  glyceraldehyde-3-phosphate dehydrogenase [Hordeum vulgare subsp. spontaneum] gb AAQ55393.1  glyceraldehyde-3-phosphate dehydrogenase [Hordeum vulgare subsp. spontaneum] gb AAQ55389.1  glyceraldehyde-3-phosphate dehydrogenase [Hordeum vulgare subsp. spontaneum] gb AAQ55387.1  glyceraldehyde-3-phosphate dehydrogenase [Hordeum vulgare subsp. spontaneum] gb AAQ55386.1  glyceraldehyde-3-phosphate dehydrogenase [Hordeum vulgare subsp. spontaneum] gb AAQ55385.1  glyceraldehyde-3-phosphate dehydrogenase [Hordeum vulgare subsp. spontaneum] gb AAQ55384.1  glyceraldehyde-3-phosphate dehydrogenase [Hordeum vulgare subsp. spontaneum] gb AAQ55381.1  glyceraldehyde-3-phosphate dehydrogenase [Hordeum vulgare subsp. spontaneum] gb AAQ55380.1  glyceraldehyde-3-phosphate dehydrogenase [Hordeum vulgare subsp. spontaneum] gb AAQ55379.1  glyceraldehyde-3-phosphate dehydrogenase | 245   | 8E-66   |
|                       |                 |                     |                          |                     | >emb CAA42901.1  glyceraldehyde 3-phosphate dehydrogenase [Hordeum vulgare]sp P26517 G3PX_HORVU Glyceraldehyde-3-phosphate dehydrogenase, cytosolic                                                                                                                                                                                                                                                                                                                                                                                                                                                                                                                                                                                                                                                                                                                                                                                                                                                                                                                                                         | 337   | 8E-66   |
| CB334677              | 1.27E-05        | Mo17<F1<B73         | 2.05                     | 10                  | >gb ABA97485.1  transposon protein, putative, mutator sub-class [Oryza sativa(japonica cultivar-group)]                                                                                                                                                                                                                                                                                                                                                                                                                                                                                                                                                                                                                                                                                                                                                                                                                                                                                                                                                                                                     | 563   | 1E-13   |
|                       |                 |                     |                          |                     | >ref NP_918060.1  B1129H01.16 [Oryza sativa (japonica cultivar-group)]                                                                                                                                                                                                                                                                                                                                                                                                                                                                                                                                                                                                                                                                                                                                                                                                                                                                                                                                                                                                                                      | 732   | 1E-12   |
|                       |                 |                     |                          |                     | >ref NP_909653.1  putative transposon protein [Oryza sativa]gb AAK50592.1  putative transposon protein [Oryza sativa]                                                                                                                                                                                                                                                                                                                                                                                                                                                                                                                                                                                                                                                                                                                                                                                                                                                                                                                                                                                       | 475   | 3E-11   |
| DV492345              | 1.30E-05        | B73<F1<Mo17         | 1.88                     | 3                   | >dbj BAD28535.1  unknown protein [Oryza sativa (japonica cultivar-group)]                                                                                                                                                                                                                                                                                                                                                                                                                                                                                                                                                                                                                                                                                                                                                                                                                                                                                                                                                                                                                                   | 159   | 9E-62   |
|                       |                 |                     |                          |                     | >ref NP_190345.1  unknown protein [Arabidopsis thaliana]emb CAB61987.1  putative protein [Arabidopsis thaliana] gb AAL85048.1  unknown protein [Arabidopsis thaliana] gb AAK76632.1  unknown protein [Arabidopsis thaliana]                                                                                                                                                                                                                                                                                                                                                                                                                                                                                                                                                                                                                                                                                                                                                                                                                                                                                 | 408   | 2E-22   |
| CD001891              | 1.30E-05        | Mo17<F1<B73         | 1.69                     | 10                  | ns                                                                                                                                                                                                                                                                                                                                                                                                                                                                                                                                                                                                                                                                                                                                                                                                                                                                                                                                                                                                                                                                                                          |       |         |
| CB886466              | 1.36E-05        | Mo17<F1<B73         | 1.74                     | 10                  | >ref XP_475416.1  putative 40S ribosomal protein S26 [Oryza sativa (japonicacultivar-group)] gb AAT01360.1  putative 40S ribosomal protein S26 [Oryza sativa (japonica cultivar-group)]                                                                                                                                                                                                                                                                                                                                                                                                                                                                                                                                                                                                                                                                                                                                                                                                                                                                                                                     | 194   | 8E-32   |
|                       |                 |                     |                          |                     | >dbj BAD87076.1  putative ribosomal protein S26 [Oryza sativa (japonicacultivar-group)] dbj BAD73505.1  putative ribosomal protein S26 [Oryza sativa (japonica cultivar-group)]                                                                                                                                                                                                                                                                                                                                                                                                                                                                                                                                                                                                                                                                                                                                                                                                                                                                                                                             | 133   | 8E-32   |
|                       |                 |                     |                          |                     | >sp P49216 RS26 ORYSA 40S ribosomal protein S26 (S31)dbj BAA07208.1  ribosomal protein S31 [Oryza sativa (japonica cultivar-group)]                                                                                                                                                                                                                                                                                                                                                                                                                                                                                                                                                                                                                                                                                                                                                                                                                                                                                                                                                                         | 133   | 6E-31   |
|                       |                 |                     |                          |                     | >gb AAD47346.1  ribosomal protein S26 [Pisum sativum]                                                                                                                                                                                                                                                                                                                                                                                                                                                                                                                                                                                                                                                                                                                                                                                                                                                                                                                                                                                                                                                       | 130   | 2E-27   |
|                       |                 |                     |                          |                     | >ref NP_191193.1  structural constituent of ribosome [Arabidopsis thaliana]emb CAB87433.1  40S ribosomal protein S26 homolog [Arabidopsis thaliana] gb AAM91494.1  AT3g56340/F18O21_300 [Arabidopsis thaliana] gb AAK63990.1  AT3g56340/F18O21_300 [Arabidopsis thaliana]                                                                                                                                                                                                                                                                                                                                                                                                                                                                                                                                                                                                                                                                                                                                                                                                                                   | 130   | 2E-26   |
| CD058853              | 1.38E-05        | Mo17<F1<B73         | 1.59                     | 10                  | ns                                                                                                                                                                                                                                                                                                                                                                                                                                                                                                                                                                                                                                                                                                                                                                                                                                                                                                                                                                                                                                                                                                          |       |         |
| CB250081              | 1.41E-05        | Mo17<B73=F1         | 2.36                     | 10                  | >dbj BAD37611.1  putative ethylene-inducible CTR1-like protein kinase [Oryza sativa(japonica cultivar-group)]                                                                                                                                                                                                                                                                                                                                                                                                                                                                                                                                                                                                                                                                                                                                                                                                                                                                                                                                                                                               | 1112  | 1E-90   |
|                       |                 |                     |                          |                     | >dbj BAD72566.1  putative salt-inducible protein kinase [Oryza sativa (japonicacultivar-group)] dbj BAD72309.1  putative salt-inducible protein kinase [Oryza sativa (japonica cultivar-group)]                                                                                                                                                                                                                                                                                                                                                                                                                                                                                                                                                                                                                                                                                                                                                                                                                                                                                                             | 1273  | 2E-83   |
|                       |                 |                     |                          |                     | >emb CAD42651.1  putative protein kinase [Hordeum vulgare subsp. vulgare]                                                                                                                                                                                                                                                                                                                                                                                                                                                                                                                                                                                                                                                                                                                                                                                                                                                                                                                                                                                                                                   | 226   | 2E-80   |
|                       |                 |                     |                          |                     | >ref NP_190276.1  ATP binding / protein kinase/ protein serine/threonine kinase/protein-tyrosine kinase [Arabidopsis thaliana] emb CAB51173.1  putative protein [Arabidopsis thaliana]                                                                                                                                                                                                                                                                                                                                                                                                                                                                                                                                                                                                                                                                                                                                                                                                                                                                                                                      | 1171  | 3E-80   |
|                       |                 |                     |                          |                     | >ref XP_476333.1  contains EST D23238(C2469)-kinase-like protein [Oryza sativa(japonica cultivar-group)]                                                                                                                                                                                                                                                                                                                                                                                                                                                                                                                                                                                                                                                                                                                                                                                                                                                                                                                                                                                                    | 1270  | 1E-79   |
| BM334318              | 1.54E-05        | Mo17<F1<B73         | 2.28                     | 10                  | ns                                                                                                                                                                                                                                                                                                                                                                                                                                                                                                                                                                                                                                                                                                                                                                                                                                                                                                                                                                                                                                                                                                          |       |         |
| BM073998              | 1.67E-05        | Mo17<F1<B73         | 2.06                     | 10                  | >ref NP_914795.1  putative thioredoxin [Oryza sativa (japonica cultivar-group)]dbj BAB90300.1  putative thioredoxin F [Oryza sativa (japonica cultivar-group)]                                                                                                                                                                                                                                                                                                                                                                                                                                                                                                                                                                                                                                                                                                                                                                                                                                                                                                                                              | 187   | 1E-51   |
|                       |                 |                     |                          |                     | >sp O81332 TRXF MESCRR Thioredoxin F-type, chloroplast precursor (TRX-F)gb AAC19392.1  thioredoxin F precursor [Mesembryanthemum crystallinum]                                                                                                                                                                                                                                                                                                                                                                                                                                                                                                                                                                                                                                                                                                                                                                                                                                                                                                                                                              | 191   | 5E-46   |
|                       |                 |                     |                          |                     | >emb CAA45098.1  thioredoxin F [Pisum sativum]gb AAC49357.1  thioredoxin f sp P29450 TRXF PEA Thioredoxin F-type, chloroplast precursor (TRX-F)                                                                                                                                                                                                                                                                                                                                                                                                                                                                                                                                                                                                                                                                                                                                                                                                                                                                                                                                                             | 182   | 3E-45   |
|                       |                 |                     |                          |                     | >ref NP_197144.1  electron transporter/ thiol-disulfide exchange intermediate[Arabidopsis thaliana] gb AAL15192.1  putative thioredoxin f2 protein [Arabidopsis thaliana] gb AAK44171.1  putative thioredoxin f2 protein [Arabidopsis thaliana] dbj BAB09607.1  thioredoxin f2 [Arabidopsis thaliana]                                                                                                                                                                                                                                                                                                                                                                                                                                                                                                                                                                                                                                                                                                                                                                                                       | 185   | 2E-44   |
|                       |                 |                     |                          |                     | sp Q9XFH9 TRXF2 ARATH Thioredoxin F-type 2, chloroplast precursor (TRX-F2) gb AAD35004.1  thioredoxin f2 [Arabidopsis thaliana]                                                                                                                                                                                                                                                                                                                                                                                                                                                                                                                                                                                                                                                                                                                                                                                                                                                                                                                                                                             |       |         |
|                       |                 |                     |                          |                     | >ref NP_186922.1  electron transporter/ thiol-disulfide exchange intermediate[Arabidopsis thaliana] gb AAF26987.1  thioredoxin f1 [Arabidopsis thaliana] gb AAM20355.1  putative thioredoxin f1 protein [Arabidopsis thaliana] gb AAL38832.1  putative thioredoxin f1 protein [Arabidopsis thaliana] gb AAM61345.1  thioredoxin f1 [Arabidopsis thaliana] sp Q9XFH8 TRXF1 ARATH Thioredoxin F-type 1, chloroplast precursor (TRX-F1)                                                                                                                                                                                                                                                                                                                                                                                                                                                                                                                                                                                                                                                                        | 178   | 3E-43   |
|                       |                 |                     |                          |                     | ns                                                                                                                                                                                                                                                                                                                                                                                                                                                                                                                                                                                                                                                                                                                                                                                                                                                                                                                                                                                                                                                                                                          |       |         |
| CB381452              | 1.76E-05        | Mo17<B73=F1         | 1.93                     | 10                  | ns                                                                                                                                                                                                                                                                                                                                                                                                                                                                                                                                                                                                                                                                                                                                                                                                                                                                                                                                                                                                                                                                                                          |       |         |
| DV490644              | 1.78E-05        | B73<F1<Mo17         | 1.7                      | 3                   | ns                                                                                                                                                                                                                                                                                                                                                                                                                                                                                                                                                                                                                                                                                                                                                                                                                                                                                                                                                                                                                                                                                                          |       |         |
| CD527629              | 1.83E-05        | Mo17<B73=F1         | 1.66                     | 10                  | ns                                                                                                                                                                                                                                                                                                                                                                                                                                                                                                                                                                                                                                                                                                                                                                                                                                                                                                                                                                                                                                                                                                          |       |         |
| CB250100              | 1.93E-05        | B73<F1<Mo17         | 1.9                      | 4                   | ns                                                                                                                                                                                                                                                                                                                                                                                                                                                                                                                                                                                                                                                                                                                                                                                                                                                                                                                                                                                                                                                                                                          |       |         |

**Table 4. Microarray analysis results, mode of gene action classification, and BLAST annotation for the 1,367 ESTs identified as differentially expressed among genotypes (15% FDR)**

| GenBank accession no.                                                      | Overall P value | Significant pattern | Fold change <sup>±</sup> | Sector <sup>±</sup> | BLAST annotation*                                                                                                                                                                                                                                                                                                                                                                        | Score | E value |
|----------------------------------------------------------------------------|-----------------|---------------------|--------------------------|---------------------|------------------------------------------------------------------------------------------------------------------------------------------------------------------------------------------------------------------------------------------------------------------------------------------------------------------------------------------------------------------------------------------|-------|---------|
| CD484493                                                                   | 2.03E-05        | F1=Mo17<B73         | 1.69                     | 9                   | >ref XP_466081.1  copper chaperone homolog CCH [Oryza sativa (japonica cultivar-group)] dbj BAD25440.1  copper chaperone homolog CCH [Oryza sativa (japonica cultivar-group)] gb AAF15285.1  copper chaperone homolog CCH [Oryza sativa]                                                                                                                                                 | 132   | 2E-25   |
|                                                                            |                 |                     |                          |                     | >dbj BAD73816.1  putative copper chaperone [Oryza sativa (japonica cultivar-group)]                                                                                                                                                                                                                                                                                                      | 252   | 1E-24   |
|                                                                            |                 |                     |                          |                     | >ref NP_191183.1  CCH [Arabidopsis thaliana] emb CAB87423.1  copper homeostasis factor [Arabidopsis thaliana] gb AAK32872.1  AT3g56240/F18O21_200 [Arabidopsis thaliana] gb AAL47423.1  AT3g56240/F18O21_200 [Arabidopsis thaliana] gb AAM62878.1  copper homeostasis factor [Arabidopsis thaliana]                                                                                      | 121   | 5E-24   |
|                                                                            |                 |                     |                          |                     | >emb CAE51321.1  chopper chaperone [Hordeum vulgare subsp. vulgare]                                                                                                                                                                                                                                                                                                                      | 112   | 9E-24   |
|                                                                            |                 |                     |                          |                     | >gb AAP06757.1  copper chaperone [Lycopersicon esculentum]                                                                                                                                                                                                                                                                                                                               | 81    | 1E-23   |
| BM073598                                                                   | 2.08E-05        | Mo17<F1<B73         | 2.08                     | 10                  | ns                                                                                                                                                                                                                                                                                                                                                                                       |       |         |
| DV550769                                                                   | 2.08E-05        | B73<F1=Mo17         | 2.48                     | 3                   | >ref XP_473863.1  OSJNBa0070C17.11 [Oryza sativa (japonica cultivar-group)] emb CAE05204.3  OSJNBa0070C17.11 [Oryza sativa (japonica cultivar-group)]                                                                                                                                                                                                                                    | 154   | 3E-8    |
| DV550769                                                                   | 2.08E-05        | B73<F1=Mo17         | 2.48                     | 3                   | >ref XP_473862.1  OSJNBa0070C17.10 [Oryza sativa (japonica cultivar-group)] emb CAE05203.3  OSJNBa0070C17.10 [Oryza sativa (japonica cultivar-group)]                                                                                                                                                                                                                                    | 202   | 2E-6    |
|                                                                            |                 |                     |                          |                     |                                                                                                                                                                                                                                                                                                                                                                                          |       |         |
| CB834083                                                                   | 2.09E-05        | B73<F1=Mo17         | 1.6                      | 3                   | >dbj BAD28519.1  unknown protein [Oryza sativa (japonica cultivar-group)]                                                                                                                                                                                                                                                                                                                | 416   | 9E-47   |
|                                                                            |                 |                     |                          |                     | >dbj BAD28520.1  unknown protein [Oryza sativa (japonica cultivar-group)]                                                                                                                                                                                                                                                                                                                | 308   | 8E-32   |
|                                                                            |                 |                     |                          |                     | >ref XP_482498.1  unknown protein [Oryza sativa (japonica cultivar-group)] dbj BAD01195.1  unknown protein [Oryza sativa (japonica cultivar-group)]                                                                                                                                                                                                                                      | 427   | 3E-22   |
|                                                                            |                 |                     |                          |                     | >dbj BAD04851.1  hypothetical protein [Solanum tuberosum]                                                                                                                                                                                                                                                                                                                                | 390   | 1E-10   |
|                                                                            |                 |                     |                          |                     | >dbj BAD04852.2  hypothetical protein [Nicotiana benthamiana]                                                                                                                                                                                                                                                                                                                            | 380   | 6E-9    |
| BM349300                                                                   | 2.36E-05        | Mo17<B73=F1         | 1.95                     | 10                  | >gb AAP46155.1  ASR-like protein 1 [Hevea brasiliensis]                                                                                                                                                                                                                                                                                                                                  | 108   | 1E-15   |
|                                                                            |                 |                     |                          |                     | >gb AAP37981.1  ASR2 [Lycopersicon peruvianum var. humifusum]                                                                                                                                                                                                                                                                                                                            | 112   | 2E-15   |
|                                                                            |                 |                     |                          |                     | >gb AAP37983.1  ASR2 [Lycopersicon cheesmanii] gb AAP37982.1  ASR2 [Lycopersicon esculentum var. cerasiforme] gb AAA99440.2  ABA- and ripening-induced protein; ABA-induced protein; ripening-induced protein [Lycopersicon esculentum]                                                                                                                                                  | 114   | 2E-15   |
|                                                                            |                 |                     |                          |                     | >emb CAA52873.1  Asr2 [Lycopersicon esculentum] sp P37219  ASR2 LYCES Abscisic stress ripening protein 2                                                                                                                                                                                                                                                                                 | 114   | 2E-15   |
|                                                                            |                 |                     |                          |                     | >gb AAL27561.1  abscisic acid response protein [Cucumis melo] gb AAL27560.1  abscisic acid response protein [Cucumis melo]                                                                                                                                                                                                                                                               | 112   | 3E-15   |
| BG874176                                                                   | 2.40E-05        | Mo17<F1<B73         | 2.12                     | 10                  | ns                                                                                                                                                                                                                                                                                                                                                                                       |       |         |
| DV549670                                                                   | 2.68E-05        | Mo17<B73=F1         | 3.39                     | 10                  | >gb AAC24570.1  trypsin inhibitor [Zea mays]                                                                                                                                                                                                                                                                                                                                             | 174   | 2E-45   |
|                                                                            |                 |                     |                          |                     | >ref NP_909091.1  putative Bowman Birk trypsin inhibitor [Oryza sativa (japonica cultivar-group)] dbj BAB18291.1  putative Bowman Birk trypsin inhibitor [Oryza sativa (japonica cultivar-group)]                                                                                                                                                                                        | 179   | 2E-23   |
|                                                                            |                 |                     |                          |                     | >ref XP_549976.1  putative Bowman Birk trypsin inhibitor [Oryza sativa (japonica cultivar-group)] dbj BAD52865.1  putative Bowman Birk trypsin inhibitor [Oryza sativa (japonica cultivar-group)] dbj BAD52690.1  putative Bowman Birk trypsin inhibitor [Oryza sativa (japonica cultivar-group)]                                                                                        | 186   | 4E-21   |
|                                                                            |                 |                     |                          |                     | >emb CAB88391.1  putative Bowman Birk trypsin inhibitor [Oryza sativa (indica cultivar-group)]                                                                                                                                                                                                                                                                                           | 185   | 6E-20   |
|                                                                            |                 |                     |                          |                     | >ref NP_909067.1  putative Bowman Birk trypsin inhibitor [Oryza sativa (japonica cultivar-group)] dbj BAB55531.1  putative Bowman Birk trypsin inhibitor [Oryza sativa (japonica cultivar-group)] dbj BAB21177.1  putative Bowman Birk trypsin inhibitor [Oryza sativa (japonica cultivar-group)]                                                                                        | 181   | 6E-20   |
|                                                                            |                 |                     |                          |                     | >ref XP_549829.1  unknown protein [Oryza sativa (japonica cultivar-group)] dbj BAD44834.1  unknown protein [Oryza sativa (japonica cultivar-group)]                                                                                                                                                                                                                                      | 363   | 2E-57   |
|                                                                            |                 |                     |                          |                     | >ref NP_908351.1  P0436E04.10 [Oryza sativa (japonica cultivar-group)]                                                                                                                                                                                                                                                                                                                   | 359   | 2E-57   |
| DV550358                                                                   | 2.76E-05        | B73<F1=Mo17         | 1.42                     | 3                   | >ref XP_468251.1  unknown protein [Oryza sativa (japonica cultivar-group)] ref XP_507026.1  PREDICTED OJ1695_H09.11 gene product [Oryza sativa (japonica cultivar-group)] dbj BAD19269.1  unknown protein [Oryza sativa (japonica cultivar-group)]                                                                                                                                       | 365   | 4E-56   |
|                                                                            |                 |                     |                          |                     | >ref NP_191004.1  ubiquitin-protein ligase/ zinc ion binding [Arabidopsis thaliana] emb CAB81801.1  RING finger-like protein [Arabidopsis thaliana]                                                                                                                                                                                                                                      |       |         |
|                                                                            |                 |                     |                          |                     | gb AAN18187.1  At3g54360/T12E18_50 [Arabidopsis thaliana] gb AAK95259.1  AT3g54360/T12E18_50 [Arabidopsis thaliana] gb AAM63273.1  RING finger-like protein [Arabidopsis thaliana]                                                                                                                                                                                                       | 405   | 2E-43   |
|                                                                            |                 |                     |                          |                     | >emb CAH89580.1  hypothetical protein [Pongo pygmaeus]                                                                                                                                                                                                                                                                                                                                   | 571   | 1E-8    |
|                                                                            |                 |                     |                          |                     | >dbj BAD34415.1  unknown protein [Oryza sativa (japonica cultivar-group)]                                                                                                                                                                                                                                                                                                                | 206   | 2E-53   |
| CD527360                                                                   | 2.87E-05        | B73<F1=Mo17         | 1.48                     | 3                   | >ref NP_196729.1  unknown protein [Arabidopsis thaliana] emb CAB87686.1  putative protein [Arabidopsis thaliana] gb AAM51276.1  unknown protein [Arabidopsis thaliana] gb AAL36156.1  unknown protein [Arabidopsis thaliana] gb AAM10172.1  putative protein [Arabidopsis thaliana] gb AAL32939.1  putative protein [Arabidopsis thaliana] gb AAM65551.1  unknown [Arabidopsis thaliana] | 207   | 4E-41   |
| CD484245                                                                   | 3.00E-05        | Mo17<F1<B73         | 1.64                     | 10                  | >emb CAD52808.1  hypothetical protein [Plasmodium falciparum 3D7] ref NP_705571.1  hypothetical protein [Plasmodium falciparum 3D7]                                                                                                                                                                                                                                                      | 450   | 3E-7    |
|                                                                            |                 |                     |                          |                     | >dbj BAD44921.1  unknown protein [Oryza sativa (japonica cultivar-group)] dbj BAD44911.1  unknown protein [Oryza sativa (japonica cultivar-group)]                                                                                                                                                                                                                                       | 90    | 3E-14   |
|                                                                            |                 |                     |                          |                     | >gb AAM64550.1  unknown [Arabidopsis thaliana]                                                                                                                                                                                                                                                                                                                                           | 102   | 2E-11   |
|                                                                            |                 |                     |                          |                     | >gb AAO42921.1  At4g16146 [Arabidopsis thaliana] dbj BAC43640.1  unknown protein [Arabidopsis thaliana]                                                                                                                                                                                                                                                                                  | 102   | 2E-10   |
|                                                                            |                 |                     |                          |                     | >ref NP_567486.1  unknown protein [Arabidopsis thaliana]                                                                                                                                                                                                                                                                                                                                 | 102   | 2E-10   |
| >gb ABA97694.1  expressed protein [Oryza sativa (japonica cultivar-group)] | 95              | 2E-7                |                          |                     |                                                                                                                                                                                                                                                                                                                                                                                          |       |         |
| CD527382                                                                   | 3.04E-05        | Mo17<F1<B73         | 1.76                     | 10                  | >ref XP_463020.1  putative Acyl-CoA-binding protein [Oryza sativa (japonica cultivar-group)] gb AAR10857.1  putative Acyl-CoA-binding protein [Oryza sativa (japonica cultivar-group)]                                                                                                                                                                                                   | 155   | 2E-39   |
|                                                                            |                 |                     |                          |                     | >ref NP_913999.1  putative Acyl-CoA binding protein (ACBP) [Oryza sativa (japonica cultivar-group)] dbj BAC99898.1  putative Acyl-CoA binding protein (ACBP) [Oryza sativa (japonica cultivar-group)] dbj BAC57826.1  putative Acyl-CoA binding protein (ACBP) [Oryza sativa (japonica cultivar-group)]                                                                                  | 91    | 3E-39   |
|                                                                            |                 |                     |                          |                     |                                                                                                                                                                                                                                                                                                                                                                                          |       |         |

**Table 4. Microarray analysis results, mode of gene action classification, and BLAST annotation for the 1,367 ESTs identified as differentially expressed among genotypes (15% FDR)**

| GenBank accession no. | Overall P value | Significant pattern | Fold change <sup>†</sup> | Sector <sup>‡</sup> | BLAST annotation*                                                                                                                                                                                                                                                                                                                                                                                                                                                                    | Score | E value |
|-----------------------|-----------------|---------------------|--------------------------|---------------------|--------------------------------------------------------------------------------------------------------------------------------------------------------------------------------------------------------------------------------------------------------------------------------------------------------------------------------------------------------------------------------------------------------------------------------------------------------------------------------------|-------|---------|
|                       |                 |                     |                          |                     | >dbj BAB85987.1  Acyl-CoA-binding protein [Panax ginseng]                                                                                                                                                                                                                                                                                                                                                                                                                            | 87    | 2E-38   |
|                       |                 |                     |                          |                     | >gb AAP82942.1  acyl-CoA-binding protein [Tropaeolum majus]                                                                                                                                                                                                                                                                                                                                                                                                                          | 90    | 7E-38   |
|                       |                 |                     |                          |                     | >emb CAB56693.1  Acyl-CoA binding protein (ACBP) [Digitalis lanata]                                                                                                                                                                                                                                                                                                                                                                                                                  | 92    | 3E-37   |
| DV551208              | 3.08E-05        | Mo17<F1<B73         | 1.7                      | 10                  | >dbj BAD52915.1  esterase/lipase/thioesterase-like protein [Oryza sativa (japonica cultivar-group)]                                                                                                                                                                                                                                                                                                                                                                                  | 698   | 1E-73   |
|                       |                 |                     |                          |                     | >dbj BAD52912.1  esterase/lipase/thioesterase-like protein [Oryza sativa (japonica cultivar-group)]                                                                                                                                                                                                                                                                                                                                                                                  | 682   | 6E-61   |
|                       |                 |                     |                          |                     | >ref NP_564662.1  catalytic [Arabidopsis thaliana]gb AAC64874.1  Contains similarity to gi 2924495 hypothetical protein Rv1920 from Mycobacterium tuberculosis genome gb AL022020. [Arabidopsis thaliana] gb AAM63493.1  unknown [Arabidopsis thaliana] gb AAO64893.1  At1g54570 [Arabidopsis thaliana]                                                                                                                                                                              |       |         |
|                       |                 |                     |                          |                     | dbj BAC43090.1  unknown protein [Arabidopsis thaliana]                                                                                                                                                                                                                                                                                                                                                                                                                               | 704   | 2E-45   |
|                       |                 |                     |                          |                     | >ref NP_566801.1  catalytic [Arabidopsis thaliana]gb AAL07256.1  unknown protein [Arabidopsis thaliana] gb AAK25855.1  unknown protein [Arabidopsis thaliana] dbj BAB01231.1  unnamed protein product [Arabidopsis thaliana]                                                                                                                                                                                                                                                         | 701   | 4E-43   |
|                       |                 |                     |                          |                     | >ref NP_198929.1  catalytic [Arabidopsis thaliana]dbj BAB09715.1  unnamed protein product [Arabidopsis thaliana]                                                                                                                                                                                                                                                                                                                                                                     | 702   | 2E-41   |
| CB381619              | 3.08E-05        | Mo17<B73=F1         | 1.73                     | 10                  | >emb CAE00870.1  TA8 protein [Oryza sativa (japonica cultivar-group)]                                                                                                                                                                                                                                                                                                                                                                                                                | 197   | 3E-64   |
|                       |                 |                     |                          |                     | >ref XP_482379.1  putative RNA binding protein [Oryza sativa (japonica cultivar-group)] ref XP_507581.1  PREDICTED OSJNBa0007M04.13 gene product [Oryza sativa (japonica cultivar-group)] ref XP_507230.1  PREDICTED OSJNBa0007M04.13 gene product [Oryza sativa (japonica cultivar-group)]                                                                                                                                                                                          |       |         |
|                       |                 |                     |                          |                     | dbj BAC99692.1  putative RNA binding protein [Oryza sativa (japonica cultivar-group)]                                                                                                                                                                                                                                                                                                                                                                                                | 214   | 3E-64   |
|                       |                 |                     |                          |                     | >gb AAL76994.1  RNA binding protein [Elaeis oleifera]                                                                                                                                                                                                                                                                                                                                                                                                                                | 218   | 2E-55   |
|                       |                 |                     |                          |                     | >gb ABB87134.1  RNA binding protein-like protein [Solanum tuberosum]                                                                                                                                                                                                                                                                                                                                                                                                                 | 217   | 9E-54   |
|                       |                 |                     |                          |                     | >ref NP_196080.1  RNA binding / nucleic acid binding [Arabidopsis thaliana]emb CAB85566.1  rna binding protein-like [Arabidopsis thaliana] gb AAM67546.1  putative RNA binding protein [Arabidopsis thaliana] gb AAL36178.1  putative rna binding protein [Arabidopsis thaliana] gb AAL06954.1  AT5g04600/T32M21_200 [Arabidopsis thaliana] gb AAK55702.1  AT5g04600/T32M21_200 [Arabidopsis thaliana]                                                                               | 222   | 3E-45   |
| DV490870              | 3.09E-05        | B73<F1<Mo17         | 1.64                     | 4                   | >gb ABA94201.1  glutamyl-tRNA(Gln) amidotransferase, B subunit [Oryza sativa(japonica cultivar-group)]                                                                                                                                                                                                                                                                                                                                                                               | 544   | 1E-63   |
|                       |                 |                     |                          |                     | >ref NP_564530.1  GATB (GLU-ADT SUBUNIT B); carbon-nitrogen ligase, with glutamine asamido-N-donor / glutamyl-tRNA(Gln) amidotransferase/ ligase [Arabidopsis thaliana] gb AAL67097.1  At1g48520/T1N15_12 [Arabidopsis thaliana] gb AAL06883.1  At1g48520/T1N15_12 [Arabidopsis thaliana]                                                                                                                                                                                            |       |         |
|                       |                 |                     |                          |                     | gb AAG29096.1  Glu-tRNA(Gln) amidotransferase subunit B [Arabidopsis thaliana]                                                                                                                                                                                                                                                                                                                                                                                                       | 550   | 2E-53   |
|                       |                 |                     |                          |                     | >dbj BAC09946.1  Glu-tRNA(Gln) amidotransferase subunit B [Thermosynechococcuselongatus BP-1] sp Q8DGC4 GATB_SYNEL Aspartyl/glutamyl-tRNA(Asn/Gln) amidotransferase subunit B (Asp/Glu-ADT subunit B) ref NP_683184.1  aspartyl/glutamyl-tRNA amidotransferase subunit B [Thermosynechococcus elongatus BP-1]                                                                                                                                                                        | 500   | 3E-41   |
|                       |                 |                     |                          |                     | >gb AAF79700.1  T1N15.14 [Arabidopsis thaliana]                                                                                                                                                                                                                                                                                                                                                                                                                                      | 618   | 4E-40   |
|                       |                 |                     |                          |                     | >dbj BAD79576.1  glutamyl-tRNA(Gln) amidotransferase subunit B [Synechococcuselongatus PCC 6301] ref YP_172096.1  aspartyl/glutamyl-tRNA amidotransferase subunit B [Synechococcus elongatus PCC 6301]                                                                                                                                                                                                                                                                               | 494   | 5E-38   |
|                       |                 |                     |                          |                     | >ref NP_179430.1  TTN5 (TITAN 5); GTP binding [Arabidopsis thaliana]gb AAL34222.1  putative ADP-ribosylation factor [Arabidopsis thaliana] gb AAK59514.1  putative ADP-ribosylation factor [Arabidopsis thaliana] gb AAM22961.1  ARL2 G-protein [Arabidopsis thaliana] gb AAD15498.1  putative ADP-ribosylation factor [Arabidopsis thaliana] gb AAM65870.1  putative ADP-ribosylation factor [Arabidopsis thaliana] sp Q9ZPX1 ARF5_ARATH Probable ADP-ribosylation factor At2g18390 | 185   | 3E-28   |
| CB815946              | 3.32E-05        | Mo17<F1<B73         | 1.68                     | 9                   | >gb EAL35698.1  ADP-ribosylation factor-like protein 2 (ARL2) [Cryptosporidiumhominis] ref XP_665925.1  ADP-ribosylation factor-like protein 2 (ARL2) [Cryptosporidium hominis]                                                                                                                                                                                                                                                                                                      | 151   | 6E-25   |
|                       |                 |                     |                          |                     | >gb EAN77845.1  ADP-ribosylation factor 6, putative [Trypanosoma brucei]ref XP_822673.1  ADP-ribosylation factor 6 [Trypanosoma brucei]                                                                                                                                                                                                                                                                                                                                              | 186   | 2E-24   |
|                       |                 |                     |                          |                     | >gb EAN90243.1  ADP-ribosylation factor, putative [Trypanosoma cruzi]ref XP_812094.1  ADP-ribosylation factor [Trypanosoma cruzi strain CL Brener]                                                                                                                                                                                                                                                                                                                                   | 186   | 2E-24   |
|                       |                 |                     |                          |                     | >ref XP_394559.1  PREDICTED: similar to ADP-ribosylation factor-like 2 [Apismellifera]                                                                                                                                                                                                                                                                                                                                                                                               | 184   | 4E-24   |
|                       |                 |                     |                          |                     | >ref NP_919594.1  putative purple acid phosphatase [Oryza sativa (japonica cultivar-group)] gb AAL34937.1  Putative purple acid phosphatase [Oryza sativa]                                                                                                                                                                                                                                                                                                                           | 335   | 4E-38   |
| DV496085              | 3.38E-05        | Mo17<B73=F1         | 1.83                     | 11                  | gb AAP51881.1  Ser/Thr protein phosphatase, putative [Oryza sativa (japonica cultivar-group)]                                                                                                                                                                                                                                                                                                                                                                                        | 328   | 2E-29   |
|                       |                 |                     |                          |                     | >gb AAT37529.1  purple acid phosphatase 1 [Solanum tuberosum]                                                                                                                                                                                                                                                                                                                                                                                                                        |       |         |
|                       |                 |                     |                          |                     | >ref NP_566587.1  ATACP5; protein serine/threonine phosphatase [Arabidopsis thaliana]gb AAV69751.1  putative purple acid phosphatase [Arabidopsis thaliana]                                                                                                                                                                                                                                                                                                                          |       |         |
|                       |                 |                     |                          |                     | gb AAO24567.1  At3g17790 [Arabidopsis thaliana] dbj BAB02702.1  purple acid phosphatase-like protein [Arabidopsis thaliana] emb CAB63938.1  acid phosphatase type 5 [Arabidopsis thaliana] emb CAC09923.1  acid phosphatase type 5 [Arabidopsis thaliana]                                                                                                                                                                                                                            | 338   | 2E-28   |
|                       |                 |                     |                          |                     | >gb AAM61192.1  acid phosphatase type 5 [Arabidopsis thaliana]                                                                                                                                                                                                                                                                                                                                                                                                                       | 338   | 8E-28   |
|                       |                 |                     |                          |                     | >gb ABA94168.1  Ser/Thr protein phosphatase family protein, putative [Oryza sativa(japonica cultivar-group)]                                                                                                                                                                                                                                                                                                                                                                         | 264   | 3E-27   |
| BM334587              | 3.53E-05        | Mo17<B73=F1         | 2.6                      | 10                  | >gb AAG34827.1  glutathione S-transferase GST 19 [Zea mays]                                                                                                                                                                                                                                                                                                                                                                                                                          | 225   | 3E-8    |
| DV494678              | 3.79E-05        | Mo17<B73=F1         | 1.63                     | 10                  | >gb AAO72563.1  elongation factor 1 gamma-like protein [Oryza sativa (japonica cultivar-group)]                                                                                                                                                                                                                                                                                                                                                                                      | 413   | 3E-85   |
|                       |                 |                     |                          |                     | >dbj BAD61932.1  putative elongation factor 1 gamma [Oryza sativa (japonica cultivar-group)] dbj BAD61828.1  putative elongation factor 1 gamma [Oryza sativa (japonica cultivar-group)]                                                                                                                                                                                                                                                                                             | 416   | 3E-85   |
|                       |                 |                     |                          |                     | >ref XP_464690.1  Elongation factor 1-gamma [Oryza sativa (japonica cultivar-group)]dbj BAD17615.1  Elongation factor 1-gamma [Oryza sativa (japonica cultivar-group)] sp Q9ZRI7 EF1G ORYSA Elongation factor 1-gamma (EF-1-gamma) (eEF-1B gamma) dbj BAA34206.1  elongation factor 1B gamma [Oryza                                                                                                                                                                                  | 418   | 2E-84   |

**Table 4. Microarray analysis results, mode of gene action classification, and BLAST annotation for the 1,367 ESTs identified as differentially expressed among genotypes (15% FDR)**

| GenBank accession no. | Overall P value | Significant pattern | Fold change <sup>†</sup> | Sector <sup>‡</sup> | BLAST annotation*                                                                                                                                                                                                                                                                                      | Score | E value |
|-----------------------|-----------------|---------------------|--------------------------|---------------------|--------------------------------------------------------------------------------------------------------------------------------------------------------------------------------------------------------------------------------------------------------------------------------------------------------|-------|---------|
|                       |                 |                     |                          |                     | >gb AAO72574.1  elongation factor 1 gamma-like protein [Oryza sativa (japonicacultivar-group)]                                                                                                                                                                                                         | 409   | 4E-84   |
|                       |                 |                     |                          |                     | >ref XP_464689.1  putative elongation factor 1-gamma [Oryza sativa (japonicacultivar-group)] dbj BAD17614.1  putative elongation factor 1-gamma [Oryza sativa (japonica cultivar-group)]                                                                                                               | 414   | 4E-84   |
| CD001334              | 3.95E-05        | Mo17<F1<B73         | 1.66                     | 10                  | >dbj BAD54696.1  hypothetical protein [Oryza sativa (japonica cultivar-group)]dbj BAD34409.1  hypothetical protein [Oryza sativa (japonica cultivar-group)]                                                                                                                                            | 75    | 6E-28   |
|                       |                 |                     |                          |                     | >dbj BAC43353.1  unknown protein [Arabidopsis thaliana]                                                                                                                                                                                                                                                | 71    | 3E-26   |
|                       |                 |                     |                          |                     | >gb EAA00792.2  ENSANGP00000020123 [Anopheles gambiae str. PEST]ref XP_320694.2  ENSANGP00000020123 [Anopheles gambiae str. PEST]                                                                                                                                                                      | 81    | 2E-10   |
|                       |                 |                     |                          |                     | >dbj BAE63661.1  unnamed protein product [Aspergillus oryzae]                                                                                                                                                                                                                                          | 117   | 5E-9    |
|                       |                 |                     |                          |                     | >ref NP_652380.2  CG13018-PA [Drosophila melanogaster]gb AA55593.1  IP033340p [Drosophila melanogaster] gb AAF58293.2  CG13018-PA [Drosophila melanogaster]                                                                                                                                            | 79    | 1E-8    |
| CB351635              | 3.97E-05        | B73<F1=Mo17         | 1.56                     | 2                   | >gb AAM16247.1  AT5g62700/MRG21_12 [Arabidopsis thaliana]gb AAK32919.1  AT5g62700/MRG21_12 [Arabidopsis thaliana]                                                                                                                                                                                      | 353   | 4E-44   |
|                       |                 |                     |                          |                     | >gb AAQ92664.1  beta-tubulin 3 [Gossypium hirsutum]sp Q6VAF8/TBB3_GOSHI Tubulin beta-3 chain (Beta-3 tubulin)                                                                                                                                                                                          | 430   | 4E-44   |
|                       |                 |                     |                          |                     | >emb CAA55022.1  beta tubulin [Oryza sativa (japonica cultivar-group)]                                                                                                                                                                                                                                 | 447   | 9E-44   |
|                       |                 |                     |                          |                     | >emb CAE52516.1  beta tubulin [Setaria viridis]                                                                                                                                                                                                                                                        | 448   | 9E-44   |
|                       |                 |                     |                          |                     | >ref NP_915874.1  tubulin beta chain [Oryza sativa (japonica cultivar-group)]dbj BAB92274.1  beta-tubulin [Oryza sativa (japonica cultivar-group)]                                                                                                                                                     |       |         |
|                       |                 |                     |                          |                     | dbj BAA06381.1  beta-tubulin [Oryza sativa (japonica cultivar-group)] sp P45960/TBB4_ORYSA Tubulin beta-4 chain (Beta-4 tubulin)                                                                                                                                                                       | 447   | 9E-44   |
| AI586887              | 4.00E-05        | Mo17<B73=F1         | 2.63                     | 10                  | >dbj BAD73259.1  unknown protein [Oryza sativa (japonica cultivar-group)]dbj BAD73143.1  unknown protein [Oryza sativa (japonica cultivar-group)]                                                                                                                                                      | 266   | 3E-16   |
|                       |                 |                     |                          |                     | >ref NP_918653.1  P0520B06.19 [Oryza sativa (japonica cultivar-group)]                                                                                                                                                                                                                                 | 258   | 3E-16   |
|                       |                 |                     |                          |                     | >ref NP_192449.1  unknown protein [Arabidopsis thaliana]ref NP_001031586.1  unknown protein [Arabidopsis thaliana] emb CAB81082.1  putative protein [Arabidopsis thaliana] gb AAQ62419.1  At4g05400 [Arabidopsis thaliana] dbj BAD43333.1  putative protein [Arabidopsis thaliana]                     | 250   | 6E-12   |
| DV494611              | 4.09E-05        | Mo17<B73=F1         | 2.03                     | 10                  | >dbj BAD27782.1  unknown protein [Oryza sativa (japonica cultivar-group)]                                                                                                                                                                                                                              | 174   | 4E-55   |
|                       |                 |                     |                          |                     | >gb AAM61727.1  unknown [Arabidopsis thaliana]                                                                                                                                                                                                                                                         | 173   | 4E-46   |
|                       |                 |                     |                          |                     | >gb AAV63879.1  hypothetical protein [Arabidopsis thaliana]ref NP_565558.1  unknown protein [Arabidopsis thaliana] gb AAM76748.1  hypothetical protein [Arabidopsis thaliana] gb AAC63664.1  expressed protein [Arabidopsis thaliana]                                                                  | 173   | 9E-46   |
|                       |                 |                     |                          |                     | >dbj BAC42221.1  unknown protein [Arabidopsis thaliana]                                                                                                                                                                                                                                                | 173   | 9E-46   |
|                       |                 |                     |                          |                     | >emb CAB79768.1  putative protein [Arabidopsis thaliana]                                                                                                                                                                                                                                               | 217   | 5E-40   |
|                       |                 |                     |                          |                     | >ref XP_478414.1  putative translational inhibitor protein [Oryza sativa (japonicacultivar-group)] dbj BAC20708.1  putative translational inhibitor protein [Oryza sativa (japonica cultivar-group)] dbj BAD31311.1  putative translational inhibitor protein [Oryza sativa (japonica cultivar-group)] | 180   | 3E-58   |
|                       |                 |                     |                          |                     | >dbj BAD00048.1  perchloric acid soluble translation inhibitor protein homolog[Gentiana triflora] dbj BAC66487.1  translation-inhibitor protein [Gentiana triflora]                                                                                                                                    | 188   | 5E-54   |
|                       |                 |                     |                          |                     | >ref NP_188674.1  endoribonuclease [Arabidopsis thaliana]gb AAK53030.1  AT3g20390/MQC12_15 [Arabidopsis thaliana] gb AAL31178.1  AT3g20390/MQC12_15 [Arabidopsis thaliana] gb AAM63246.1  translational inhibitor protein, putative [Arabidopsis thaliana]                                             | 187   | 8E-53   |
|                       |                 |                     |                          |                     | >dbj BAB02821.1  unnamed protein product [Arabidopsis thaliana]                                                                                                                                                                                                                                        | 143   | 8E-53   |
|                       |                 |                     |                          |                     | >emb CAE56534.1  Hypothetical protein CBG24261 [Caenorhabditis briggsae]                                                                                                                                                                                                                               | 172   | 1E-32   |
|                       |                 |                     |                          |                     | >emb CAA92107.1  cytochrome c oxidase, Vc subunit [Hordeum vulgare subsp. vulgare]sp Q42841 COX5C_HORVU Cytochrome c oxidase polypeptide Vc (Cytochrome c oxidase subunit 5c)                                                                                                                          | 63    | 2E-13   |
| DV491049              | 4.16E-05        | Mo17<B73=F1         | 1.88                     | 10                  | >gb ABA98934.1  Cytochrome c oxidase subunit Vc [Oryza sativa (japonicacultivar-group)] sp Q9SXX7 COX5C_ORYSA Cytochrome c oxidase polypeptide Vc (Cytochrome c oxidase subunit 5c) dbj BAA77682.1  cytochrome c oxidase subunit 5c [Oryza sativa (japonica cultivar-group)]                           | 63    | 4E-13   |
|                       |                 |                     |                          |                     | >gb AAL67939.1  cytochrome c oxidase subunit 5c [Helianthus annuus]sp Q8VY39 CX5C2_HELAN Cytochrome c oxidase polypeptide Vc-2 (Cytochrome c oxidase subunit 5c-2)                                                                                                                                     | 64    | 2E-11   |
|                       |                 |                     |                          |                     | >gb AAL67938.1  cytochrome c oxidase subunit 5c [Helianthus annuus]sp Q8VY40 CX5C1_HELAN Cytochrome c oxidase polypeptide Vc-1 (Cytochrome c oxidase subunit 5c-1)                                                                                                                                     | 63    | 2E-11   |
|                       |                 |                     |                          |                     | >gb AAB31231.1  cytochrome c oxidase subunit Vc [Ipomoea batatas]emb CAA37470.1  unnamed protein product [Ipomoea batatas] sp P19173 COX5C_IPOBA Cytochrome c oxidase polypeptide Vc (Cytochrome c oxidase subunit 5c)                                                                                 | 64    | 3E-10   |
| CD058607              | 4.17E-05        | B73<F1=Mo17         | 1.51                     | 3                   | >dbj BAC78569.1  katanin [Oryza sativa (japonica cultivar-group)]dbj BAD87507.1  katanin [Oryza sativa (japonica cultivar-group)]                                                                                                                                                                      | 386   | 3E-25   |
|                       |                 |                     |                          |                     | >ref NP_916186.1  katanin p60 subunit A 1-like [Oryza sativa (japonicacultivar-group)]                                                                                                                                                                                                                 | 428   | 3E-25   |
|                       |                 |                     |                          |                     | >dbj BAD73366.1  katanin p60 subunit A 1-like [Oryza sativa (japonicacultivar-group)] dbj BAD73313.1  katanin p60 subunit A 1-like [Oryza sativa (japonica cultivar-group)]                                                                                                                            | 152   | 2E-22   |
|                       |                 |                     |                          |                     | >dbj BAD73365.1  vacuolar protein sorting factor 4B-like [Oryza sativa (japonicacultivar-group)] dbj BAD73312.1  vacuolar protein sorting factor 4B-like [Oryza sativa (japonica cultivar-group)]                                                                                                      | 410   | 2E-22   |
|                       |                 |                     |                          |                     | >ref NP_916872.1  putative katanin [Oryza sativa (japonica cultivar-group)]                                                                                                                                                                                                                            | 411   | 2E-22   |
| CB334483              | 4.22E-05        | Mo17<F1<B73         | 1.54                     | 10                  | ns                                                                                                                                                                                                                                                                                                     |       |         |
| CA998709              | 4.28E-05        | Mo17<B73=F1         | 1.45                     | 10                  | >emb CAI64400.1  thioredoxin h1 protein [Zea mays]                                                                                                                                                                                                                                                     | 128   | 1E-59   |
|                       |                 |                     |                          |                     | >ref XP_475666.1  putative thioredoxin H-type (TRX-H) (TrxTa) [Oryza sativa (japonicacultivar-group)] gb AAT44260.1  putative thioredoxin H-type (TRX-H) (TrxTa) [Oryza sativa (japonica cultivar-group)]                                                                                              | 121   | 3E-47   |

**Table 4. Microarray analysis results, mode of gene action classification, and BLAST annotation for the 1,367 ESTs identified as differentially expressed among genotypes (15% FDR)**

| GenBank accession no. | Overall P value | Significant pattern | Fold change <sup>†</sup> | Sector <sup>‡</sup> | BLAST annotation*                                                                                                                                                                                                                                                                                                                                                                                                                        | Score | E value |
|-----------------------|-----------------|---------------------|--------------------------|---------------------|------------------------------------------------------------------------------------------------------------------------------------------------------------------------------------------------------------------------------------------------------------------------------------------------------------------------------------------------------------------------------------------------------------------------------------------|-------|---------|
|                       |                 |                     |                          |                     | >dbj BAB20886.1  thioredoxin h [Oryza sativa (japonica cultivar-group)]                                                                                                                                                                                                                                                                                                                                                                  | 121   | 3E-47   |
|                       |                 |                     |                          |                     | >gb AAF88067.1  thioredoxin H [Triticum aestivum]emb CAB96931.1  thioredoxin h [Triticum aestivum]                                                                                                                                                                                                                                                                                                                                       | 125   | 1E-43   |
|                       |                 |                     |                          |                     | >gb AAP72291.1  thioredoxin h isoform 2; HvTrxh2 [Hordeum vulgare subsp. vulgare]                                                                                                                                                                                                                                                                                                                                                        | 122   | 1E-43   |
| BM073357              | 4.32E-05        | Mo17<B73=F1         | 2.15                     | 10                  | >gb ABA98519.1  hAT family dimerisation domain, putative [Oryza sativa (japonica cultivar-group)]                                                                                                                                                                                                                                                                                                                                        | 337   | 8E-8    |
|                       |                 |                     |                          |                     | >prf 2021344A activator-like transposable element                                                                                                                                                                                                                                                                                                                                                                                        | 804   | 3E-7    |
|                       |                 |                     |                          |                     | >ref NP_920480.1  putative activator-like transposable element [Oryza sativa(japonica cultivar-group)] gb AAM18172.1  Putative activator-like transposable element [Oryza sativa (japonica cultivar-group)] gb AAP52767.1  hAT family dimerisation domain, putative [Oryza sativa (japonica cultivar-group)]                                                                                                                             | 737   | 5E-7    |
|                       |                 |                     |                          |                     | >ref XP_471074.1  OSJNBa0020P07.19 [Oryza sativa (japonica cultivar-group)]emb CAE01302.2  OSJNBa0020P07.19 [Oryza sativa (japonica cultivar-group)]                                                                                                                                                                                                                                                                                     | 741   | 7E-7    |
|                       |                 |                     |                          |                     | >emb CAA25635.1  unnamed protein product [Zea mays]                                                                                                                                                                                                                                                                                                                                                                                      | 221   | 9E-7    |
| DV494490              | 4.35E-05        | B73<F1=Mo17         | 1.57                     | 3                   | >ref XP_474220.1  OSJNBa0084K01.4 [Oryza sativa (japonica cultivar-group)]emb CAE04832.1  OSJNBa0084K01.4 [Oryza sativa (japonica cultivar-group)]                                                                                                                                                                                                                                                                                       | 176   | 3E-41   |
|                       |                 |                     |                          |                     | >gb AAM67107.1  transcription co-activator-like protein [Arabidopsis thaliana]                                                                                                                                                                                                                                                                                                                                                           | 168   | 2E-32   |
|                       |                 |                     |                          |                     | >gb AAV84520.1  At5g03220 [Arabidopsis thaliana]ref NP_195942.1  unknown protein [Arabidopsis thaliana] emb CAB86089.1  putative protein [Arabidopsis thaliana] gb AAG40347.1  AT5g03220 [Arabidopsis thaliana] dbj BAC42181.1  unknown protein [Arabidopsis thaliana] dbj BAB08382.1  transcriptional co-activator-like protein [Arabidopsis thaliana]                                                                                  | 168   | 2E-32   |
|                       |                 |                     |                          |                     | >emb CAB83310.1  transcriptional co-activator-like protein [Arabidopsis thaliana]gb AAM19916.1  At5g03505/C320EPL23M [Arabidopsis thaliana]                                                                                                                                                                                                                                                                                              | 168   | 9E-32   |
|                       |                 |                     |                          |                     | gb AAL91616.1  At5g03505/C320EPL23M [Arabidopsis thaliana]                                                                                                                                                                                                                                                                                                                                                                               | 443   | 4E-31   |
|                       |                 |                     |                          |                     | >ref NP_195970.1  unknown protein [Arabidopsis thaliana]                                                                                                                                                                                                                                                                                                                                                                                 |       |         |
| BG840953              | 4.38E-05        | Mo17<B73=F1         | 1.56                     | 10                  | >ref XP_463020.1  putative Acyl-CoA-binding protein [Oryza sativa (japonica cultivar-group)] gb AAR10857.1  putative Acyl-CoA-binding protein [Oryza sativa (japonica cultivar-group)]                                                                                                                                                                                                                                                   | 155   | 4E-39   |
|                       |                 |                     |                          |                     | >ref NP_913999.1  putative Acyl-CoA binding protein (ACBP) [Oryza sativa (japonica cultivar-group)] dbj BAC99898.1  putative Acyl-CoA binding protein (ACBP) [Oryza sativa (japonica cultivar-group)] dbj BAC57826.1  putative Acyl-CoA binding protein (ACBP) [Oryza sativa (japonica cultivar-group)]                                                                                                                                  | 91    | 6E-39   |
|                       |                 |                     |                          |                     | >dbj BAB85987.1  Acyl-CoA-binding protein [Panax ginseng]                                                                                                                                                                                                                                                                                                                                                                                | 87    | 4E-38   |
|                       |                 |                     |                          |                     | >gb AAP82942.1  acyl-CoA-binding protein [Tropaeolum majus]                                                                                                                                                                                                                                                                                                                                                                              | 90    | 2E-37   |
|                       |                 |                     |                          |                     | >emb CAB56693.1  Acyl-CoA binding protein (ACBP) [Digitalis lanata]                                                                                                                                                                                                                                                                                                                                                                      | 92    | 6E-37   |
| BM078903              | 4.40E-05        | Mo17<B73=F1         | 2.3                      | 10                  | >gb AAV26525.1  12-oxo-phytyldienoic acid reductase [Zea mays]                                                                                                                                                                                                                                                                                                                                                                           | 371   | 4E-61   |
|                       |                 |                     |                          |                     | >dbj BAD06575.1  LED1-5c protein [Lithospermum erythrorhizon]                                                                                                                                                                                                                                                                                                                                                                            | 375   | 8E-48   |
|                       |                 |                     |                          |                     | >gb AAB62248.1  old-yellow-enzyme homolog [Catharanthus roseus]                                                                                                                                                                                                                                                                                                                                                                          | 379   | 9E-44   |
|                       |                 |                     |                          |                     | >gb ABA26969.1  TO18-1 [Taraxacum officinale]                                                                                                                                                                                                                                                                                                                                                                                            | 125   | 9E-42   |
|                       |                 |                     |                          |                     | >dbj BAD12185.1  12-oxophytodienoic acid 10,11-reductase [Pisum sativum]dbj BAB40340.1  12-oxophytodienoic acid 10, 11-reductase [Pisum sativum]                                                                                                                                                                                                                                                                                         | 371   | 2E-40   |
| DV490637              | 4.40E-05        | Mo17<B73=F1         | 2.01                     | 11                  | ns                                                                                                                                                                                                                                                                                                                                                                                                                                       |       |         |
| DV622467              | 4.43E-05        | Mo17<F1<B73         | 1.78                     | 9                   | ns                                                                                                                                                                                                                                                                                                                                                                                                                                       |       |         |
| CB334576              | 4.52E-05        | Mo17<B73=F1         | 1.46                     | 10                  | >ref XP_483643.1  putative cytochrome p450 (CYP78A9) [Oryza sativa (japonica cultivar-group)] dbj BAD09934.1  putative cytochrome p450 (CYP78A9) [Oryza sativa (japonica cultivar-group)]                                                                                                                                                                                                                                                | 551   | 2E-47   |
|                       |                 |                     |                          |                     | >dbj BAD33760.1  putative cytochrome P450 [Oryza sativa (japonica cultivar-group)]                                                                                                                                                                                                                                                                                                                                                       | 553   | 6E-45   |
|                       |                 |                     |                          |                     | >gb ABC59089.1  cytochrome P450 monooxygenase CYP78A [Medicago truncatula]                                                                                                                                                                                                                                                                                                                                                               | 546   | 2E-43   |
|                       |                 |                     |                          |                     | >gb AAF26465.1  T2SK16.18 [Arabidopsis thaliana]                                                                                                                                                                                                                                                                                                                                                                                         | 544   | 3E-42   |
|                       |                 |                     |                          |                     | >ref NP_171627.1  CYP78A8; heme binding / iron ion binding / monooxygenase/ oxygenbinding [Arabidopsis thaliana]                                                                                                                                                                                                                                                                                                                         | 535   | 3E-42   |
| CB350976              | 4.67E-05        | Mo17<F1<B73         | 1.52                     | 9                   | >ref NP_917838.1  putative chloroplast 50S ribosomal protein L31 [Oryza sativa(japonica cultivar-group)] dbj BAB90423.1  chloroplast 50S ribosomal protein L31-like [Oryza sativa (japonica cultivar-group)] dbj BAB90722.1  chloroplast 50S ribosomal protein L31-like [Oryza sativa (japonica cultivar-group)]                                                                                                                         | 135   | 5E-25   |
| CB604817              | 4.72E-05        | Mo17<F1<B73         | 1.7                      | 10                  | >gb AAV50048.1  S27 ribosomal protein [Saccharum hybrid cultivar]gb AAC97381.1  40S ribosomal protein S27 homolog [Zea mays]                                                                                                                                                                                                                                                                                                             | 86    | 4E-38   |
|                       |                 |                     |                          |                     | >emb CAC42163.1  putative ribosomal protein S27 [Hordeum vulgare subsp. vulgare]emb CAC42162.1  putative ribosomal protein S27 [Hordeum vulgare subsp. vulgare] emb CAC42134.1  putative ribosomal protein S27 [Hordeum vulgare subsp. vulgare] emb CAA59732.2  putative zinc finger protein [Hordeum vulgare subsp. vulgare] sp Q96564RS27 HORVU 40S ribosomal protein S27 (Manganese efficiency-related protein 1)                     | 86    | 9E-38   |
|                       |                 |                     |                          |                     | >ref XP_465641.1  40S ribosomal protein S27 [Oryza sativa (japonica cultivar-group)]dbj BAD22060.1  40S ribosomal protein S27 [Oryza sativa (japonica cultivar-group)]                                                                                                                                                                                                                                                                   | 86    | 3E-37   |
|                       |                 |                     |                          |                     | >gb AAV50037.1  ribosomal protein S27 [Saccharum hybrid cultivar]                                                                                                                                                                                                                                                                                                                                                                        | 84    | 4E-37   |
|                       |                 |                     |                          |                     | >ref XP_472001.1  OSJNBa0020I02.1 [Oryza sativa (japonica cultivar-group)]emb CAD40354.1  OSJNBa0020I02.1 [Oryza sativa (japonica cultivar-group)]                                                                                                                                                                                                                                                                                       | 86    | 2E-36   |
| DV490268              | 4.86E-05        | Mo17<F1<B73         | 1.8                      | 10                  | >gb ABA96667.1  jacalin homolog [Oryza sativa (japonica cultivar-group)]                                                                                                                                                                                                                                                                                                                                                                 | 307   | 4E-26   |
|                       |                 |                     |                          |                     | >gb ABA94002.1  NBS-LRR resistance protein, putative [Oryza sativa (japonica cultivar-group)]                                                                                                                                                                                                                                                                                                                                            | 1386  | 1E-24   |
|                       |                 |                     |                          |                     | >ref NP_908901.1  Mannose-Binding Rice Lectin [Oryza sativa (japonica cultivar-group)] gb AAK82986.1  salt-induced protein [Oryza sativa (japonica cultivar-group)] gb AAL30827.1  lectin-like protein [Oryza sativa] dbj BAB93403.1  salT gene product [Oryza sativa (japonica cultivar-group)] dbj BAB63898.1  salT gene product [Oryza sativa (japonica cultivar-group)] dbj BAA25369.1  MRL [Oryza sativa (japonica cultivar-group)] | 145   | 1E-22   |

**Table 4. Microarray analysis results, mode of gene action classification, and BLAST annotation for the 1,367 ESTs identified as differentially expressed among genotypes (15% FDR)**

| GenBank accession no. | Overall P value | Significant pattern | Fold change <sup>†</sup> | Sector <sup>‡</sup> | BLAST annotation*                                                                                                                                                                                                                                                                                                                                                                                                                                                                                                                                   | Score | E value |
|-----------------------|-----------------|---------------------|--------------------------|---------------------|-----------------------------------------------------------------------------------------------------------------------------------------------------------------------------------------------------------------------------------------------------------------------------------------------------------------------------------------------------------------------------------------------------------------------------------------------------------------------------------------------------------------------------------------------------|-------|---------|
|                       |                 |                     |                          |                     | >gb ABA97248.1  jacalin homolog [Oryza sativa (japonica cultivar-group)]gb ABB51090.1  mannose-specific jacalin-related lectin [Oryza sativa (japonica cultivar-group)]                                                                                                                                                                                                                                                                                                                                                                             | 306   | 1E-22   |
|                       |                 |                     |                          |                     | >emb CAA81059.1  salT [Oryza sativa]gb AAB23484.1  15 kDa organ-specific salt-induced protein [Oryza sativa] sp P24120 SALT_ORYSA Salt stress-induced protein (Salt protein)                                                                                                                                                                                                                                                                                                                                                                        | 145   | 1E-22   |
| CB616939              | 4.97E-05        | Mo17<B73=F1         | 1.64                     | 10                  | ns                                                                                                                                                                                                                                                                                                                                                                                                                                                                                                                                                  |       |         |
| CD001132              | 5.00E-05        | Mo17<B73=F1         | 1.65                     | 10                  | ns                                                                                                                                                                                                                                                                                                                                                                                                                                                                                                                                                  |       |         |
|                       |                 |                     |                          |                     | >ref NP_920316.1  putative transposon protein [Oryza sativa (japonica cultivar-group)]gb AAN05390.1  putative transposon protein [Oryza sativa (japonica cultivar-group)] gb AAP52603.1  transposon protein, putative, CACTA, En/Spm sub-class [Oryza sativa (japonica cultivar-group)]                                                                                                                                                                                                                                                             | 1620  | 5E-6    |
| BM073127              | 5.01E-05        | Mo17<F1<B73         | 1.85                     | 10                  | >gb ABA97584.1  transposon protein, putative, CACTA, En/Spm sub-class [Oryza sativa (japonica cultivar-group)]                                                                                                                                                                                                                                                                                                                                                                                                                                      | 1599  | 5E-6    |
|                       |                 |                     |                          |                     | >ref NP_564010.1  unknown protein [Arabidopsis thaliana]gb AAK62433.1  Unknown protein [Arabidopsis thaliana] gb AAP13425.1  At1g16880 [Arabidopsis thaliana] gb AAF99845.1  Unknown protein [Arabidopsis thaliana]                                                                                                                                                                                                                                                                                                                                 | 290   | 2E-15   |
| CB240057              | 5.09E-05        | Mo17<F1<B73         | 1.52                     | 10                  | >ref NP_973847.1  unknown protein [Arabidopsis thaliana]                                                                                                                                                                                                                                                                                                                                                                                                                                                                                            | 213   | 2E-15   |
|                       |                 |                     |                          |                     | >gb AAM64912.1  unknown [Arabidopsis thaliana]                                                                                                                                                                                                                                                                                                                                                                                                                                                                                                      | 301   | 2E-8    |
|                       |                 |                     |                          |                     | >ref NP_196094.1  amino acid binding [Arabidopsis thaliana]emb CAB86016.1  putative protein [Arabidopsis thaliana] gb AAM48021.1  putative protein [Arabidopsis thaliana] gb AAL62393.1  putative protein [Arabidopsis thaliana] dbj BAB08978.1  unnamed protein product [Arabidopsis thaliana]                                                                                                                                                                                                                                                     | 301   | 2E-8    |
|                       |                 |                     |                          |                     | >gb ABA95833.1  ACT domain, putative [Oryza sativa (japonica cultivar-group)]                                                                                                                                                                                                                                                                                                                                                                                                                                                                       | 279   | 3E-6    |
| CD573503              | 5.09E-05        | Mo17<B73=F1         | 1.37                     | 10                  | >emb CAE04894.3  OSJNBa0042115.16 [Oryza sativa (japonica cultivar-group)]sp Q7XLX6 S1FA2 ORYSA DNA-binding protein S1FA2                                                                                                                                                                                                                                                                                                                                                                                                                           | 80    | 2E-7    |
|                       |                 |                     |                          |                     | >emb CAE04896.3  OSJNBa0042115.18 [Oryza sativa (japonica cultivar-group)]sp P42553 S1FA1 ORYSA DNA-binding protein S1FA1                                                                                                                                                                                                                                                                                                                                                                                                                           | 76    | 4E-6    |
| BM334805              | 5.44E-05        | Mo17<F1<B73         | 1.78                     | 10                  | >gb AAV88601.1  low temperature and salt responsive protein [Pennisetum glaucum]                                                                                                                                                                                                                                                                                                                                                                                                                                                                    | 56    | 3E-17   |
|                       |                 |                     |                          |                     | >ref XP_479247.1  putative low temperature and salt responsive protein [Oryza sativa (japonica cultivar-group)] gb AAS72305.1  drought-induced hydrophobic protein [Oryza sativa (japonica cultivar-group)] dbj BAC16385.1  putative low temperature and salt responsive protein [Oryza sativa (japonica cultivar-group)] sp Q8H5T6 LTI6A_ORYSA Hydrophobic protein LTI6A (Low temperature-induced protein 6A) gb AAT37941.1  low temperature-induced low molecular weight integral membrane protein LTI6a [Oryza sativa (japonica cultivar-group)] | 56    | 2E-16   |
|                       |                 |                     |                          |                     | >ref NP_908456.1  unnamed protein product [Oryza sativa (japonica cultivar-group)]                                                                                                                                                                                                                                                                                                                                                                                                                                                                  | 537   | 3E-14   |
|                       |                 |                     |                          |                     | >dbj BAD34659.1  plasma membrane protein 3 [Leymus chinensis]                                                                                                                                                                                                                                                                                                                                                                                                                                                                                       | 54    | 3E-13   |
|                       |                 |                     |                          |                     | >dbj BAD34658.1  plasma membrane protein 3 [Leymus chinensis]                                                                                                                                                                                                                                                                                                                                                                                                                                                                                       | 54    | 4E-13   |
| CD527395              | 5.45E-05        | Mo17<F1<B73         | 1.59                     | 10                  | >dbj BAD34362.1  ankyrin-like protein [Oryza sativa (japonica cultivar-group)]dbj BAD34405.1  ankyrin-like protein [Oryza sativa (japonica cultivar-group)]                                                                                                                                                                                                                                                                                                                                                                                         | 562   | 1E-42   |
|                       |                 |                     |                          |                     | >ref XP_483595.1  ankyrin-like protein [Oryza sativa (japonica cultivar-group)]dbj BAD08980.1  ankyrin-like protein [Oryza sativa (japonica cultivar-group)]                                                                                                                                                                                                                                                                                                                                                                                        | 528   | 1E-36   |
|                       |                 |                     |                          |                     | >ref NP_180741.1  protein binding [Arabidopsis thaliana]gb AAD32290.1  ankyrin-like protein [Arabidopsis thaliana]                                                                                                                                                                                                                                                                                                                                                                                                                                  | 662   | 3E-28   |
|                       |                 |                     |                          |                     | >ref NP_172055.1  protein binding [Arabidopsis thaliana]gb AAD30616.1  Hypothetical protein [Arabidopsis thaliana]                                                                                                                                                                                                                                                                                                                                                                                                                                  | 627   | 3E-27   |
|                       |                 |                     |                          |                     | >ref NP_172250.1  protein binding [Arabidopsis thaliana]gb AAF75083.1  It contains Ank repeat PF00023. EST gb A1996003 comes from this gene. [Arabidopsis thaliana]                                                                                                                                                                                                                                                                                                                                                                                 | 543   | 7E-23   |
| BG840742              | 5.48E-05        | Mo17<F1<B73         | 2.65                     | 10                  | ns                                                                                                                                                                                                                                                                                                                                                                                                                                                                                                                                                  |       |         |
| BM072919              | 5.57E-05        | Mo17<F1<B73         | 2.24                     | 10                  | ns                                                                                                                                                                                                                                                                                                                                                                                                                                                                                                                                                  |       |         |
| CD001508              | 6.00E-05        | Mo17<F1<B73         | 1.5                      | 10                  | >gb AAV28627.1  putative 60S ribosomal protein L31 [Zea mays]                                                                                                                                                                                                                                                                                                                                                                                                                                                                                       | 124   | 5E-39   |
|                       |                 |                     |                          |                     | >dbj BAD61612.1  putative 60S ribosomal protein L31 [Oryza sativa (japonica cultivar-group)]                                                                                                                                                                                                                                                                                                                                                                                                                                                        | 124   | 3E-38   |
|                       |                 |                     |                          |                     | >ref XP_467485.1  putative 60S ribosomal protein L31 [Oryza sativa (japonica cultivar-group)] dbj BAD12898.1  putative 60S ribosomal protein L31 [Oryza sativa (japonica cultivar-group)]                                                                                                                                                                                                                                                                                                                                                           | 123   | 1E-37   |
|                       |                 |                     |                          |                     | >ref XP_483237.1  putative 60S ribosomal protein L31 [Oryza sativa (japonica cultivar-group)] dbj BAD10170.1  putative 60S ribosomal protein L31 [Oryza sativa (japonica cultivar-group)] dbj BAD08833.1  putative 60S ribosomal protein L31 [Oryza sativa (japonica cultivar-group)]                                                                                                                                                                                                                                                               | 122   | 1E-37   |
|                       |                 |                     |                          |                     | >gb AAF42953.1  80S ribosomal protein L31 [Perilla frutescens]sp Q9M573 RL31 PERFR 60S ribosomal protein L31                                                                                                                                                                                                                                                                                                                                                                                                                                        | 121   | 2E-36   |
| BM335672              | 6.09E-05        | Mo17<B73=F1         | 1.58                     | 10                  | ns                                                                                                                                                                                                                                                                                                                                                                                                                                                                                                                                                  |       |         |
| CD661842              | 6.20E-05        | Mo17<B73=F1         | 1.42                     | 10                  | >sp O48557 RL17 MAIZE 60S ribosomal protein L17gb AAB88619.1  ribosomal protein L17 [Zea mays]                                                                                                                                                                                                                                                                                                                                                                                                                                                      | 171   | 6E-85   |
|                       |                 |                     |                          |                     | >ref XP_450351.1  putative ribosomal protein L17 [Oryza sativa (japonica cultivar-group)] ref XP_507427.1  PREDICTED P0523B07.46 gene product [Oryza sativa (japonica cultivar-group)] ref XP_506642.1  PREDICTED P0523B07.46 gene product [Oryza sativa (japonica cultivar-group)] dbj BAD23752.1  putative ribosomal protein L17 [Oryza sativa (japonica cultivar-group)] dbj BAD23438.1  putative ribosomal protein L17 [Oryza sativa (japonica cultivar-group)]                                                                                 | 171   | 8E-79   |
|                       |                 |                     |                          |                     | >ref XP_483472.1  putative ribosomal protein L17 [Oryza sativa (japonica cultivar-group)] dbj BAD09119.1  putative ribosomal protein L17 [Oryza sativa (japonica cultivar-group)] dbj BAD09020.1  putative ribosomal protein L17 [Oryza sativa (japonica cultivar-group)]                                                                                                                                                                                                                                                                           | 171   | 1E-77   |
|                       |                 |                     |                          |                     | >emb CAA44599.1  ribosomal protein L17-2 [Hordeum vulgare subsp. vulgare]sp P35267 RL172 HORVU 60S ribosomal protein L17-2                                                                                                                                                                                                                                                                                                                                                                                                                          | 172   | 9E-76   |
|                       |                 |                     |                          |                     | >gb AAG49551.1  ribosomal protein L17-1 [Poa secunda]                                                                                                                                                                                                                                                                                                                                                                                                                                                                                               | 171   | 4E-75   |
| DV495669              | 6.26E-05        | Mo17<B73=F1         | 1.8                      | 10                  | >emb CAE00870.1  TA8 protein [Oryza sativa (japonica cultivar-group)]                                                                                                                                                                                                                                                                                                                                                                                                                                                                               | 197   | 1E-22   |



**Table 4. Microarray analysis results, mode of gene action classification, and BLAST annotation for the 1,367 ESTs identified as differentially expressed among genotypes (15% FDR)**

| GenBank accession no. | Overall P value | Significant pattern | Fold change <sup>†</sup> | Sector <sup>‡</sup> | BLAST annotation*                                                                                                                                                                                                                                                                                                                                                                                       | Score | E value |
|-----------------------|-----------------|---------------------|--------------------------|---------------------|---------------------------------------------------------------------------------------------------------------------------------------------------------------------------------------------------------------------------------------------------------------------------------------------------------------------------------------------------------------------------------------------------------|-------|---------|
|                       |                 |                     |                          |                     | >ref XP_482379.1  putative RNA binding protein [Oryza sativa (japonica cultivar-group)] ref XP_507581.1  PREDICTED OSJNBa0007M04.13 gene product [Oryza sativa (japonica cultivar-group)] ref XP_507230.1  PREDICTED OSJNBa0007M04.13 gene product [Oryza sativa (japonica cultivar-group)] dbj BAC99692.1  putative RNA binding protein [Oryza sativa (japonica cultivar-group)]                       | 214   | 1E-22   |
|                       |                 |                     |                          |                     | >gb ABB87134.1  RNA binding protein-like protein [Solanum tuberosum]                                                                                                                                                                                                                                                                                                                                    | 217   | 6E-16   |
|                       |                 |                     |                          |                     | >gb AAL76994.1  RNA binding protein [Elaeis oleifera]                                                                                                                                                                                                                                                                                                                                                   | 218   | 1E-14   |
|                       |                 |                     |                          |                     | >ref NP_196080.1  RNA binding / nucleic acid binding [Arabidopsis thaliana] emb CAB85566.1  rna binding protein-like [Arabidopsis thaliana] gb AAM67546.1  putative RNA binding protein [Arabidopsis thaliana] gb AAL36178.1  putative rna binding protein [Arabidopsis thaliana] gb AAL06954.1  AT5g04600/T32M21_200 [Arabidopsis thaliana] gb AAK55702.1  AT5g04600/T32M21_200 [Arabidopsis thaliana] | 222   | 3E-13   |
| BM073364              | 6.47E-05        | Mo17<F1<B73         | 1.69                     | 9                   | >gb ABA94031.1  Rubredoxin, putative [Oryza sativa (japonica cultivar-group)]                                                                                                                                                                                                                                                                                                                           | 151   | 3E-18   |
|                       |                 |                     |                          |                     | >ref NP_568749.1  electron transporter/ metal ion binding [Arabidopsis thaliana] gb AAL85079.1  unknown protein [Arabidopsis thaliana] gb AAK92703.1  unknown protein [Arabidopsis thaliana] gb AAM63852.1  unknown [Arabidopsis thaliana] dbj BAB08747.1  unnamed protein product [Arabidopsis thaliana]                                                                                               | 154   | 4E-15   |
| CD001176              | 6.48E-05        | Mo17<B73=F1         | 1.33                     | 10                  | >emb CAE04894.3  OSJNBa0042I15.16 [Oryza sativa (japonica cultivar-group)] sp Q7XLX6 S1FA2 ORYSA DNA-binding protein S1FA2                                                                                                                                                                                                                                                                              | 80    | 1E-7    |
|                       |                 |                     |                          |                     | >emb CAE04896.3  OSJNBa0042I15.18 [Oryza sativa (japonica cultivar-group)] sp P42553 S1FA1 ORYSA DNA-binding protein S1FA1                                                                                                                                                                                                                                                                              | 76    | 2E-6    |
| CB815948              | 6.75E-05        | B73<F1=Mo17         | 1.46                     | 3                   | >emb CAA37061.1  unnamed protein product [Zea mays] sp P18026 TBB2 MAIZE Tubulin beta-2 chain (Beta-2 tubulin)                                                                                                                                                                                                                                                                                          | 444   | 2E-59   |
|                       |                 |                     |                          |                     | >gb AAT94032.1  beta-tubulin [Oryza sativa (japonica cultivar-group)] dbj BAC82429.1  beta-tubulin [Oryza sativa (japonica cultivar-group)] sp Q76FS3 TBB6 ORYSA Tubulin beta-6 chain (Beta-6 tubulin)                                                                                                                                                                                                  | 444   | 5E-59   |
|                       |                 |                     |                          |                     | >emb CAA55022.1  beta tubulin [Oryza sativa (japonica cultivar-group)]                                                                                                                                                                                                                                                                                                                                  | 447   | 6E-59   |
|                       |                 |                     |                          |                     | >emb CAE52516.1  beta tubulin [Setaria viridis]                                                                                                                                                                                                                                                                                                                                                         | 448   | 6E-59   |
|                       |                 |                     |                          |                     | >ref NP_915874.1  tubulin beta chain [Oryza sativa (japonica cultivar-group)] dbj BAB92274.1  beta-tubulin [Oryza sativa (japonica cultivar-group)] dbj BAA06381.1  beta-tubulin [Oryza sativa (japonica cultivar-group)] sp P45960 TBB4 ORYSA Tubulin beta-4 chain (Beta-4 tubulin)                                                                                                                    | 447   | 6E-59   |
| BM333794              | 6.82E-05        | F1=Mo17<B73         | 1.82                     | 9                   | ns                                                                                                                                                                                                                                                                                                                                                                                                      |       |         |
| CB815646              | 6.90E-05        | Mo17<F1<B73         | 2.41                     | 9                   | >dbj BAD27782.1  unknown protein [Oryza sativa (japonica cultivar-group)]                                                                                                                                                                                                                                                                                                                               | 174   | 3E-57   |
|                       |                 |                     |                          |                     | >gb AAM61727.1  unknown [Arabidopsis thaliana]                                                                                                                                                                                                                                                                                                                                                          | 173   | 1E-47   |
|                       |                 |                     |                          |                     | >gb AAV63879.1  hypothetical protein [Arabidopsis thaliana] ref NP_565558.1  unknown protein [Arabidopsis thaliana] gb AAM76748.1  hypothetical protein [Arabidopsis thaliana] gb AAC63664.1  expressed protein [Arabidopsis thaliana]                                                                                                                                                                  | 173   | 2E-47   |
|                       |                 |                     |                          |                     | >dbj BAC42221.1  unknown protein [Arabidopsis thaliana]                                                                                                                                                                                                                                                                                                                                                 | 173   | 2E-47   |
|                       |                 |                     |                          |                     | >ref NP_567848.1  unknown protein [Arabidopsis thaliana] gb AAM62730.1  unknown [Arabidopsis thaliana]                                                                                                                                                                                                                                                                                                  | 173   | 1E-42   |
| BG874044              | 7.33E-05        | F1=Mo17<B73         | 1.87                     | 9                   | ns                                                                                                                                                                                                                                                                                                                                                                                                      |       |         |
|                       |                 |                     |                          |                     | >gb AAX95073.1  Fructose-bisphosphate aldolase class-I [Oryza sativa (japonica cultivar-group)] gb ABA91633.1  Fructose-bisphosphate aldolase class-I [Oryza sativa (japonica cultivar-group)]                                                                                                                                                                                                          | 363   | 2E-85   |
| BM349987              | 7.38E-05        | Mo17<B73=F1         | 1.83                     | 10                  | >gb AAX95072.1  Fructose-bisphosphate aldolase class-I [Oryza sativa (japonica cultivar-group)] gb ABA91632.1  Fructose-bisphosphate aldolase class-I [Oryza sativa (japonica cultivar-group)] sp Q40677 ALFC ORYSA Fructose-bisphosphate aldolase, chloroplast precursor (ALDP)                                                                                                                        | 388   | 2E-85   |
|                       |                 |                     |                          |                     | >dbj BAA02730.1  chloroplastic aldolase [Oryza sativa]                                                                                                                                                                                                                                                                                                                                                  | 388   | 3E-84   |
|                       |                 |                     |                          |                     | >gb AAF74220.1  fructose 1,6-bisphosphate aldolase precursor [Avena sativa]                                                                                                                                                                                                                                                                                                                             | 388   | 9E-82   |
|                       |                 |                     |                          |                     | >gb AAB70542.1  aldolase [Oryza sativa]                                                                                                                                                                                                                                                                                                                                                                 | 362   | 1E-80   |
|                       |                 |                     |                          |                     | >gb AAT94032.1  beta-tubulin [Oryza sativa (japonica cultivar-group)] dbj BAC82429.1  beta-tubulin [Oryza sativa (japonica cultivar-group)] sp Q76FS3 TBB6 ORYSA Tubulin beta-6 chain (Beta-6 tubulin)                                                                                                                                                                                                  | 444   | 7E-72   |
| DV621225              | 7.60E-05        | B73<F1=Mo17         | 1.66                     | 3                   | >emb CAA55022.1  beta tubulin [Oryza sativa (japonica cultivar-group)]                                                                                                                                                                                                                                                                                                                                  | 447   | 1E-71   |
|                       |                 |                     |                          |                     | >emb CAE52516.1  beta tubulin [Setaria viridis]                                                                                                                                                                                                                                                                                                                                                         | 448   | 1E-71   |
|                       |                 |                     |                          |                     | >ref NP_915874.1  tubulin beta chain [Oryza sativa (japonica cultivar-group)] dbj BAB92274.1  beta-tubulin [Oryza sativa (japonica cultivar-group)] dbj BAA06381.1  beta-tubulin [Oryza sativa (japonica cultivar-group)] sp P45960 TBB4 ORYSA Tubulin beta-4 chain (Beta-4 tubulin)                                                                                                                    | 447   | 1E-71   |
|                       |                 |                     |                          |                     | >gb AAA66495.1  beta-tubulin                                                                                                                                                                                                                                                                                                                                                                            | 447   | 1E-71   |
|                       |                 |                     |                          |                     | >ref XP_464199.1  putative ribosomal protein S14 [Oryza sativa (japonica cultivar-group)] ref XP_506724.1  PREDICTED OJ9003_G05.34 gene product [Oryza sativa (japonica cultivar-group)] dbj BAD25218.1  putative ribosomal protein S14 [Oryza sativa (japonica cultivar-group)]                                                                                                                        | 150   | 9E-63   |
| CB331824              | 7.80E-05        | Mo17<F1<B73         | 1.42                     | 10                  | >ref XP_472410.1  OJ000126_13.9 [Oryza sativa (japonica cultivar-group)] emb CAE02065.2  OJ000126_13.9 [Oryza sativa (japonica cultivar-group)] dbj BAD29299.1  40S ribosomal protein S14 [Oryza sativa (japonica cultivar-group)] dbj BAD27798.1  40S ribosomal protein S14 [Oryza sativa (japonica cultivar-group)]                                                                                   | 151   | 1E-61   |
|                       |                 |                     |                          |                     | >sp P19950 RS141 MAIZE 40S ribosomal protein S14 (Clone MCH1)                                                                                                                                                                                                                                                                                                                                           | 149   | 5E-61   |
|                       |                 |                     |                          |                     | >gb AAO41731.1  cytoplasmic ribosomal protein S14 [Brassica napus]                                                                                                                                                                                                                                                                                                                                      | 150   | 4E-60   |
|                       |                 |                     |                          |                     | >gb ABC01912.1  ribosomal protein S14-like protein [Solanum tuberosum] gb ABB87124.1  hypothetical protein [Solanum tuberosum]                                                                                                                                                                                                                                                                          | 150   | 2E-59   |
|                       |                 |                     |                          |                     | >dbj BAD87076.1  putative ribosomal protein S26 [Oryza sativa (japonica cultivar-group)] dbj BAD73505.1  putative ribosomal protein S26 [Oryza sativa (japonica cultivar-group)]                                                                                                                                                                                                                        | 133   | 4E-33   |

**Table 4. Microarray analysis results, mode of gene action classification, and BLAST annotation for the 1,367 ESTs identified as differentially expressed among genotypes (15% FDR)**

| GenBank accession no. | Overall P value | Significant pattern | Fold change <sup>†</sup> | Sector <sup>‡</sup> | BLAST annotation*                                                                                                                                                                                                                                                                                                                                                                                                                                          | Score | E value |
|-----------------------|-----------------|---------------------|--------------------------|---------------------|------------------------------------------------------------------------------------------------------------------------------------------------------------------------------------------------------------------------------------------------------------------------------------------------------------------------------------------------------------------------------------------------------------------------------------------------------------|-------|---------|
|                       |                 |                     |                          |                     | >ref XP_475416.1  putative 40S ribosomal protein S26 [Oryza sativa (japonica cultivar-group)] gb AAT01360.1  putative 40S ribosomal protein S26 [Oryza sativa (japonica cultivar-group)]                                                                                                                                                                                                                                                                   | 194   | 7E-33   |
|                       |                 |                     |                          |                     | >sp P49216 RS26 Oryza 40S ribosomal protein S26 (S31)dbj BAA07208.1  ribosomal protein S31 [Oryza sativa (japonica cultivar-group)]                                                                                                                                                                                                                                                                                                                        | 133   | 6E-32   |
|                       |                 |                     |                          |                     | >gb AAD47346.1  ribosomal protein S26 [Pisum sativum]                                                                                                                                                                                                                                                                                                                                                                                                      | 130   | 2E-27   |
|                       |                 |                     |                          |                     | >ref NP_191193.1  structural constituent of ribosome [Arabidopsis thaliana]emb CAB87433.1  40S ribosomal protein S26 homolog [Arabidopsis thaliana] gb AAM91494.1  AT3g56340/F18O21_300 [Arabidopsis thaliana] gb AAK63990.1  AT3g56340/F18O21_300 [Arabidopsis thaliana]                                                                                                                                                                                  | 130   | 2E-26   |
| CD485155              | 8.24E-05        | Mo17<B73=F1         | 1.5                      | 10                  | >emb CAB90214.1  putative elongation factor 1 beta [Hordeum vulgare subsp. vulgare]                                                                                                                                                                                                                                                                                                                                                                        | 226   | 3E-40   |
|                       |                 |                     |                          |                     | >gb AAR15081.1  translational elongation factor 1 subunit Bbeta [Pisum sativum]                                                                                                                                                                                                                                                                                                                                                                            | 231   | 2E-39   |
|                       |                 |                     |                          |                     | >ref XP_479153.1  elongation factor 1 beta [Oryza sativa (japonica cultivar-group)]ref XP_506463.1  PREDICTED P0616D06.117 gene product [Oryza sativa (japonica cultivar-group)] dbj BAC16499.1  elongation factor 1 beta [Oryza sativa (japonica cultivar-group)] dbj BAA04903.1  elongation factor 1 beta [Oryza sativa (japonica cultivar-group)] sp Q40680 EF1D Oryza Elongation factor 1-delta (EF-1-delta) (Elongation factor 1B-beta) (eEF-1B beta) | 229   | 8E-39   |
|                       |                 |                     |                          |                     | >gb AAU89237.1  elongation factor 1 beta 2 [Oryza sativa (japonica cultivar-group)]dbj BAA34599.1  elongation factor 1 beta 2 [Oryza sativa (japonica cultivar-group)] dbj BAA34598.1  elongation factor 1 beta 2 [Oryza sativa (japonica cultivar-group)]                                                                                                                                                                                                 | 226   | 8E-39   |
|                       |                 |                     |                          |                     | >gb ABA81875.1  putative elongation factor 1B alpha-subunit0like [Solanum tuberosum] gb ABA40427.1  unknown [Solanum tuberosum]                                                                                                                                                                                                                                                                                                                            | 227   | 2E-38   |
| CD573184              | 8.26E-05        | B73<F1<Mo17         | 1.39                     | 4                   | >emb CAA55021.1  beta tubulin [Oryza sativa (japonica cultivar-group)]                                                                                                                                                                                                                                                                                                                                                                                     | 383   | 3E-98   |
|                       |                 |                     |                          |                     | >emb CAE52517.1  beta tubulin [Setaria viridis]                                                                                                                                                                                                                                                                                                                                                                                                            | 448   | 3E-98   |
|                       |                 |                     |                          |                     | >emb CAE52516.1  beta tubulin [Setaria viridis]                                                                                                                                                                                                                                                                                                                                                                                                            | 448   | 3E-98   |
|                       |                 |                     |                          |                     | >gb AAL92118.1  beta-tubulin [Gossypium hirsutum]gb AAL92026.1  tubulin beta-1 [Gossypium hirsutum]                                                                                                                                                                                                                                                                                                                                                        | 445   | 3E-98   |
|                       |                 |                     |                          |                     | >gb AAM10035.1  beta tubulin [Arabidopsis thaliana]gb AAK96884.1  beta tubulin [Arabidopsis thaliana]                                                                                                                                                                                                                                                                                                                                                      | 449   | 3E-98   |
| BM333861              | 8.49E-05        | Mo17<B73=F1         | 1.7                      | 10                  | >ref XP_473776.1  OSJNBa0041A02.14 [Oryza sativa (japonica cultivar-group)]emb CAD41867.2  OSJNBa0041A02.14 [Oryza sativa (japonica cultivar-group)]                                                                                                                                                                                                                                                                                                       | 396   | 3E-29   |
|                       |                 |                     |                          |                     | >emb CAA67728.1  pectinacetyltransferase precursor [Vigna radiata var. radiata]                                                                                                                                                                                                                                                                                                                                                                            | 399   | 2E-20   |
|                       |                 |                     |                          |                     | >ref NP_193677.2  carboxylic ester hydrolase [Arabidopsis thaliana]gb AAU45212.1  At4g19420 [Arabidopsis thaliana] gb AAT70429.1  At4g19420 [Arabidopsis thaliana]                                                                                                                                                                                                                                                                                         | 397   | 1E-18   |
|                       |                 |                     |                          |                     | >dbj BAD94548.1  pectinacetyltransferase like protein [Arabidopsis thaliana]                                                                                                                                                                                                                                                                                                                                                                               | 195   | 1E-18   |
|                       |                 |                     |                          |                     | >ref XP_467338.1  putative pectin acetyltransferase [Oryza sativa (japonica cultivar-group)] dbj BAD08059.1  putative pectin acetyltransferase [Oryza sativa (japonica cultivar-group)] dbj BAD07550.1  putative pectin acetyltransferase [Oryza sativa (japonica cultivar-group)]                                                                                                                                                                         | 397   | 9E-17   |
| BM340087              | 8.54E-05        | Mo17<B73=F1         | 4.19                     | 10                  | >ref NP_912448.1  Unknown protein [Oryza sativa (japonica cultivar-group)]gb AAO15289.1  Unknown protein [Oryza sativa (japonica cultivar-group)]                                                                                                                                                                                                                                                                                                          | 240   | 1E-53   |
|                       |                 |                     |                          |                     | >ref NP_568767.1  oxidoreductase, acting on paired donors, with incorporation or reduction of molecular oxygen, 2-oxoglutarate as one donor, and incorporation of one atom each of oxygen into both donors [Arabidopsis thaliana] gb AAM63324.1  unknown [Arabidopsis thaliana]                                                                                                                                                                            | 227   | 1E-41   |
|                       |                 |                     |                          |                     | >gb AAO42850.1  At5g51880 [Arabidopsis thaliana]                                                                                                                                                                                                                                                                                                                                                                                                           | 227   | 1E-41   |
|                       |                 |                     |                          |                     | >dbj BAA97223.1  unnamed protein product [Arabidopsis thaliana]                                                                                                                                                                                                                                                                                                                                                                                            | 250   | 1E-41   |
|                       |                 |                     |                          |                     | >ref XP_452140.1  unnamed protein product [Kluyveromyces lactis]emb CAH02533.1  unnamed protein product [Kluyveromyces lactis NRRL Y-1140]                                                                                                                                                                                                                                                                                                                 | 227   | 3E-24   |
| DV942309              | 8.58E-05        | Mo17<B73=F1         | 2.25                     | 10                  | ns                                                                                                                                                                                                                                                                                                                                                                                                                                                         |       |         |
| CB331490              | 8.76E-05        | Mo17<B73=F1         | 1.59                     | 10                  | >ref XP_464689.1  putative elongation factor 1-gamma [Oryza sativa (japonica cultivar-group)] dbj BAD17614.1  putative elongation factor 1-gamma [Oryza sativa (japonica cultivar-group)]                                                                                                                                                                                                                                                                  | 414   | 2E-63   |
|                       |                 |                     |                          |                     | >dbj BAD61932.1  putative elongation factor 1 gamma [Oryza sativa (japonica cultivar-group)] dbj BAD61828.1  putative elongation factor 1 gamma [Oryza sativa (japonica cultivar-group)]                                                                                                                                                                                                                                                                   | 416   | 7E-62   |
|                       |                 |                     |                          |                     | >ref XP_464690.1  Elongation factor 1-gamma [Oryza sativa (japonica cultivar-group)]dbj BAD17615.1  Elongation factor 1-gamma [Oryza sativa (japonica cultivar-group)] sp Q9ZRI7 EF1G Oryza Elongation factor 1-gamma (EF-1-gamma) (eEF-1B gamma) dbj BAA34206.1  elongation factor 1B gamma [Oryza sativa (japonica cultivar-group)]                                                                                                                      | 418   | 7E-62   |
|                       |                 |                     |                          |                     | >gb AAO72563.1  elongation factor 1 gamma-like protein [Oryza sativa (japonica cultivar-group)]                                                                                                                                                                                                                                                                                                                                                            | 413   | 2E-60   |
|                       |                 |                     |                          |                     | >gb AAO72574.1  elongation factor 1 gamma-like protein [Oryza sativa (japonica cultivar-group)]                                                                                                                                                                                                                                                                                                                                                            | 409   | 4E-59   |
| CD527738              | 8.87E-05        | Mo17<B73=F1         | 10.2                     | 10                  | >gb AAQ01160.1  transmembrane protein kinase [Oryza sativa (japonica cultivar-group)]                                                                                                                                                                                                                                                                                                                                                                      | 999   | 5E-6    |
|                       |                 |                     |                          |                     | >ref XP_550586.1  putative transmembrane protein kinase [Oryza sativa (japonica cultivar-group)] dbj BAD67663.1  putative transmembrane protein kinase [Oryza sativa (japonica cultivar-group)] dbj BAD44800.1  putative transmembrane protein kinase [Oryza sativa (japonica cultivar-group)]                                                                                                                                                             | 980   | 5E-6    |
| CD568357              | 9.01E-05        | Mo17<B73=F1         | 1.52                     | 10                  | >dbj BAD68931.1  polygalacturonase PG1-like [Oryza sativa (japonica cultivar-group)]                                                                                                                                                                                                                                                                                                                                                                       | 538   | 4E-22   |
|                       |                 |                     |                          |                     | >ref XP_475942.1  putative polygalacturonase [Oryza sativa (japonica cultivar-group)]gb AAU10689.1  putative polygalacturonase [Oryza sativa (japonica cultivar-group)] gb AAT39158.1  putative polygalacturonase [Oryza sativa (japonica cultivar-group)]                                                                                                                                                                                                 | 571   | 1E-14   |
|                       |                 |                     |                          |                     | >gb AAD39587.1  10A19L1 [Oryza sativa (japonica cultivar-group)]                                                                                                                                                                                                                                                                                                                                                                                           | 184   | 1E-14   |
| BM333756              | 9.07E-05        | Mo17<B73=F1         | 1.52                     | 10                  | >gb ABA93830.1  beta-hydroxysteroid dehydrogenase, putative [Oryza sativa (japonica cultivar-group)]                                                                                                                                                                                                                                                                                                                                                       | 340   | 8E-32   |
|                       |                 |                     |                          |                     | >gb ABA93829.1  beta-hydroxysteroid dehydrogenase, putative [Oryza sativa (japonica cultivar-group)]                                                                                                                                                                                                                                                                                                                                                       | 354   | 8E-32   |
|                       |                 |                     |                          |                     | >ref XP_465933.1  putative steroleosin [Oryza sativa (japonica cultivar-group)]dbj BAD23082.1  putative steroleosin [Oryza sativa (japonica cultivar-group)]                                                                                                                                                                                                                                                                                               | 357   | 9E-10   |
|                       |                 |                     |                          |                     | >ref XP_465935.1  putative steroleosin [Oryza sativa (japonica cultivar-group)]dbj BAD23084.1  putative steroleosin [Oryza sativa (japonica cultivar-group)]                                                                                                                                                                                                                                                                                               | 395   | 7E-7    |
| DV622182              | 9.17E-05        | Mo17<F1<B73         | 1.79                     | 10                  | >gb AAT75242.1  putative N2,N2-dimethylguanosine tRNA methyltransferase [Oryza sativa (japonica cultivar-group)]                                                                                                                                                                                                                                                                                                                                           | 608   | 3E-24   |

**Table 4. Microarray analysis results, mode of gene action classification, and BLAST annotation for the 1,367 ESTs identified as differentially expressed among genotypes (15% FDR)**

| GenBank accession no. | Overall P value | Significant pattern | Fold change <sup>†</sup> | Sector <sup>‡</sup> | BLAST annotation*                                                                                                                                                                                                                                                                                                                                                                                                                                                              | Score | E value |
|-----------------------|-----------------|---------------------|--------------------------|---------------------|--------------------------------------------------------------------------------------------------------------------------------------------------------------------------------------------------------------------------------------------------------------------------------------------------------------------------------------------------------------------------------------------------------------------------------------------------------------------------------|-------|---------|
|                       |                 |                     |                          |                     | >gb AAL86317.1  putative N2,N2-dimethylguanine tRNA methyltransferase [Arabidopsisthaliana]                                                                                                                                                                                                                                                                                                                                                                                    | 670   | 3E-19   |
|                       |                 |                     |                          |                     | >ref NP_197085.2  RNA binding / S-adenosylmethionine-dependent methyltransferase/tRNA (guanine-N2)-methyltransferase [Arabidopsis thaliana]                                                                                                                                                                                                                                                                                                                                    | 691   | 3E-19   |
|                       |                 |                     |                          |                     | >emb CAC01780.1  N2, N2-dimethylguanine tRNA methyltransferase-like protein[Arabidopsis thaliana]                                                                                                                                                                                                                                                                                                                                                                              | 684   | 3E-19   |
|                       |                 |                     |                          |                     | >sp Q9LFU5 TRM1_ARATH Probable N(2),N(2)-dimethylguanosine tRNA methyltransferase(tRNA(guanine-26,N(2)-N(2)) methyltransferase) (tRNA 2,2-dimethylguanosine-26 methyltransferase) (tRNA(m(2,2)G26)dimethyltransferase)                                                                                                                                                                                                                                                         | 586   | 3E-19   |
| BM074489              | 9.25E-05        | Mo17<F1<B73         | 1.79                     | 9                   | >ref XP_465863.1  putative cytochrome P450 [Oryza sativa (japonica cultivar-group)]dbj BAD23217.1  putative cytochrome P450 [Oryza sativa (japonica cultivar-group)]                                                                                                                                                                                                                                                                                                           | 525   | 9E-48   |
|                       |                 |                     |                          |                     | >ref XP_465865.1  putative cytochrome P450 [Oryza sativa (japonica cultivar-group)]dbj BAD23219.1  putative cytochrome P450 [Oryza sativa (japonica cultivar-group)]                                                                                                                                                                                                                                                                                                           | 524   | 3E-47   |
|                       |                 |                     |                          |                     | >ref XP_465864.1  putative cytochrome P450 [Oryza sativa (japonica cultivar-group)]dbj BAD23218.1  putative cytochrome P450 [Oryza sativa (japonica cultivar-group)]                                                                                                                                                                                                                                                                                                           | 509   | 7E-46   |
|                       |                 |                     |                          |                     | >ref XP_469849.1  putative cytochrome P450 [Oryza sativa (japonica cultivar-group)]gb AAK63940.1  putative cytochrome P450 [Oryza sativa (japonica cultivar-group)]                                                                                                                                                                                                                                                                                                            | 512   | 4E-37   |
|                       |                 |                     |                          |                     | >ref XP_469850.1  putative cytochrome P450 [Oryza sativa (japonica cultivar-group)]gb AAK63920.1  putative cytochrome P450 [Oryza sativa (japonica cultivar-group)]                                                                                                                                                                                                                                                                                                            | 732   | 6E-37   |
| CD568378              | 9.25E-05        | B73<F1<Mo17         | 1.41                     | 4                   | >emb CAA86728.1  calcium-binding protein [Zea mays]emb CAA61939.1  Calreticulin precursor [Zea mays] prf 2205314A calreticulin                                                                                                                                                                                                                                                                                                                                                 | 421   | 1E-72   |
|                       |                 |                     |                          |                     | >gb AAW02798.1  calreticulin-like protein [Triticum aestivum]                                                                                                                                                                                                                                                                                                                                                                                                                  | 415   | 9E-70   |
|                       |                 |                     |                          |                     | >ref XP_477252.1  putative Calreticulin precursor [Oryza sativa (japonica cultivar-group)] dbj BAD31962.1  putative Calreticulin precursor [Oryza sativa (japonica cultivar-group)] dbj BAC82933.1  putative Calreticulin precursor [Oryza sativa (japonica cultivar-group)]                                                                                                                                                                                                   | 429   | 2E-68   |
|                       |                 |                     |                          |                     | >ref XP_477251.1  putative Calreticulin precursor [Oryza sativa (japonica cultivar-group)] ref XP_507358.1  PREDICTED OJ1058_C08.28-2 gene product [Oryza sativa (japonica cultivar-group)] ref XP_506239.1  PREDICTED OJ1058_C08.28-2 gene product [Oryza sativa (japonica cultivar-group)] dbj BAD31961.1  putative Calreticulin precursor [Oryza sativa (japonica cultivar-group)] dbj BAC82932.1  putative Calreticulin precursor [Oryza sativa (japonica cultivar-group)] | 424   | 2E-68   |
|                       |                 |                     |                          |                     | sp Q9SLY8 CRTC_ORYSA Calreticulin precursor                                                                                                                                                                                                                                                                                                                                                                                                                                    | 424   | 2E-68   |
|                       |                 |                     |                          |                     | >dbj BAA88900.1  calcium-binding protein [Oryza sativa]                                                                                                                                                                                                                                                                                                                                                                                                                        | 424   | 2E-68   |
| CD484346              | 9.32E-05        | Mo17<F1<B73         | 1.48                     | 10                  | >ref XP_475416.1  putative 40S ribosomal protein S26 [Oryza sativa (japonica cultivar-group)] gb AAT01360.1  putative 40S ribosomal protein S26 [Oryza sativa (japonica cultivar-group)]                                                                                                                                                                                                                                                                                       | 194   | 5E-27   |
|                       |                 |                     |                          |                     | >dbj BAD87076.1  putative ribosomal protein S26 [Oryza sativa (japonica cultivar-group)] dbj BAD73505.1  putative ribosomal protein S26 [Oryza sativa (japonica cultivar-group)]                                                                                                                                                                                                                                                                                               | 133   | 5E-27   |
|                       |                 |                     |                          |                     | >sp P49216 RS26_ORYSA 40S ribosomal protein S26 (S31)dbj BAA07208.1  ribosomal protein S31 [Oryza sativa (japonica cultivar-group)]                                                                                                                                                                                                                                                                                                                                            | 133   | 5E-26   |
|                       |                 |                     |                          |                     | >gb AAD47346.1  ribosomal protein S26 [Pisum sativum]                                                                                                                                                                                                                                                                                                                                                                                                                          | 130   | 7E-22   |
|                       |                 |                     |                          |                     | >ref NP_191193.1  structural constituent of ribosome [Arabidopsis thaliana]emb CAB87433.1  40S ribosomal protein S26 homolog [Arabidopsis thaliana] gb AAM91494.1  AT3g56340/F18O21_300 [Arabidopsis thaliana] gb AAK63990.1  AT3g56340/F18O21_300 [Arabidopsis thaliana]                                                                                                                                                                                                      | 130   | 2E-21   |
| CB816603              | 1.04E-04        | Mo17<B73=F1         | 1.71                     | 10                  | ns                                                                                                                                                                                                                                                                                                                                                                                                                                                                             |       |         |
| CB240017              | 1.08E-04        | Mo17<F1<B73         | 1.72                     | 10                  | >ref XP_482379.1  putative RNA binding protein [Oryza sativa (japonica cultivar-group)] ref XP_507581.1  PREDICTED OSJNBa0007M04.13 gene product [Oryza sativa (japonica cultivar-group)] ref XP_507230.1  PREDICTED OSJNBa0007M04.13 gene product [Oryza sativa (japonica cultivar-group)]                                                                                                                                                                                    | 214   | 5E-22   |
|                       |                 |                     |                          |                     | dbj BAC99692.1  putative RNA binding protein [Oryza sativa (japonica cultivar-group)]                                                                                                                                                                                                                                                                                                                                                                                          | 217   | 1E-17   |
|                       |                 |                     |                          |                     | >gb ABB87134.1  RNA binding protein-like protein [Solanum tuberosum]                                                                                                                                                                                                                                                                                                                                                                                                           | 218   | 5E-17   |
|                       |                 |                     |                          |                     | >gb AAL76994.1  RNA binding protein [Elaeis oleifera]                                                                                                                                                                                                                                                                                                                                                                                                                          |       |         |
|                       |                 |                     |                          |                     | >ref NP_196080.1  RNA binding / nucleic acid binding [Arabidopsis thaliana]emb CAB85566.1  rna binding protein-like [Arabidopsis thaliana] gb AAM67546.1  putative RNA binding protein [Arabidopsis thaliana] gb AAL36178.1  putative rna binding protein [Arabidopsis thaliana] gb AAL06954.1  AT5g04600/T32M21_200 [Arabidopsis thaliana] gb AAK55702.1  AT5g04600/T32M21_200 [Arabidopsis thaliana]                                                                         | 222   | 2E-15   |
|                       |                 |                     |                          |                     | >emb CAE00870.1  TA8 protein [Oryza sativa (japonica cultivar-group)]                                                                                                                                                                                                                                                                                                                                                                                                          | 197   | 5E-14   |
| BM078579              | 1.08E-04        | Mo17<B73=F1         | 1.73                     | 10                  | >dbj BAD53225.1  myosin heavy chain-like [Oryza sativa (japonica cultivar-group)]                                                                                                                                                                                                                                                                                                                                                                                              | 755   | 8E-50   |
|                       |                 |                     |                          |                     | >ref NP_917406.1  putative myosin-like protein my5 [Oryza sativa (japonica cultivar-group)]                                                                                                                                                                                                                                                                                                                                                                                    | 574   | 3E-45   |
|                       |                 |                     |                          |                     | >gb AAD17931.2  unconventional myosin heavy chain [Zea mays]                                                                                                                                                                                                                                                                                                                                                                                                                   | 1529  | 3E-30   |
|                       |                 |                     |                          |                     | >dbj BAD72949.1  myosin XI [Nicotiana tabacum]                                                                                                                                                                                                                                                                                                                                                                                                                                 | 1529  | 1E-29   |
|                       |                 |                     |                          |                     | >gb AAB71529.1  unconventional myosin [Helianthus annuus]                                                                                                                                                                                                                                                                                                                                                                                                                      | 1528  | 6E-29   |
| BM074160              | 1.09E-04        | Mo17<F1<B73         | 1.74                     | 10                  | >gb AAV32180.1  unknown protein [Oryza sativa (japonica cultivar-group)]                                                                                                                                                                                                                                                                                                                                                                                                       | 536   | 7E-40   |
|                       |                 |                     |                          |                     | >ref NP_568306.1  metal ion binding [Arabidopsis thaliana]gb AAL06982.1  AT5g14910/F2G14_30 [Arabidopsis thaliana] gb AAK62653.1  AT5g14910/F2G14_30 [Arabidopsis thaliana] gb AAM63286.1  unknown [Arabidopsis thaliana]                                                                                                                                                                                                                                                      | 178   | 5E-23   |
|                       |                 |                     |                          |                     | >emb CAC01810.1  putative protein [Arabidopsis thaliana]                                                                                                                                                                                                                                                                                                                                                                                                                       | 175   | 7E-21   |
| DV550600              | 1.10E-04        | B73<F1<Mo17         | 1.56                     | 3                   | >ref XP_475374.1  putative histone H2A [Oryza sativa (japonica cultivar-group)]gb AAT39181.1  putative histone H2A [Oryza sativa (japonica cultivar-group)]                                                                                                                                                                                                                                                                                                                    | 163   | 2E-39   |
|                       |                 |                     |                          |                     | gb AAT39174.1  putative histone H2A [Oryza sativa (japonica cultivar-group)]                                                                                                                                                                                                                                                                                                                                                                                                   | 159   | 2E-38   |
|                       |                 |                     |                          |                     | >ref NP_918596.1  putative histone H2A [Oryza sativa (japonica cultivar-group)]dbj BAB44136.1  putative histone H2A [Oryza sativa (japonica cultivar-group)]                                                                                                                                                                                                                                                                                                                   |       |         |

**Table 4. Microarray analysis results, mode of gene action classification, and BLAST annotation for the 1,367 ESTs identified as differentially expressed among genotypes (15% FDR)**

| GenBank accession no.                   | Overall P value | Significant pattern | Fold change <sup>†</sup> | Sector <sup>‡</sup> | BLAST annotation*                                                                                                                                                                                                                                                                                                                                                                                         | Score | E value |
|-----------------------------------------|-----------------|---------------------|--------------------------|---------------------|-----------------------------------------------------------------------------------------------------------------------------------------------------------------------------------------------------------------------------------------------------------------------------------------------------------------------------------------------------------------------------------------------------------|-------|---------|
| CD651672                                | 1.11E-04        | Mo17<F1<B73         | 1.52                     | 9                   | >gb AAT08680.1  histone H2A [Hyacinthus orientalis]                                                                                                                                                                                                                                                                                                                                                       | 152   | 3E-38   |
|                                         |                 |                     |                          |                     | >gb AAT08677.1  histone H2A [Hyacinthus orientalis]                                                                                                                                                                                                                                                                                                                                                       | 152   | 3E-38   |
|                                         |                 |                     |                          |                     | >gb AAF65769.1  histone H2A [Euphorbia esula]sp Q9M531 H2A EUPES Histone H2A                                                                                                                                                                                                                                                                                                                              | 153   | 1E-37   |
|                                         |                 |                     |                          |                     | >gb AAC19375.1  acireductone dioxygenase 2 [Oryza sativa]                                                                                                                                                                                                                                                                                                                                                 | 198   | 1E-92   |
| DV549653                                | 1.13E-04        | Mo17<B73=F1         | 1.61                     | 11                  | >gb AAX55895.1  aci-reductone dioxygenase-like protein [Oryza sativa (japonica cultivar-group)]                                                                                                                                                                                                                                                                                                           | 198   | 3E-92   |
|                                         |                 |                     |                          |                     | >gb AAN06863.1  Putative probable submergence induced, nickel-binding protein 2A[Oryza sativa (japonica cultivar-group)]                                                                                                                                                                                                                                                                                  | 254   | 2E-90   |
|                                         |                 |                     |                          |                     | >dbj BAB61039.1  iron-deficiency induced gene [Hordeum vulgare]                                                                                                                                                                                                                                                                                                                                           | 198   | 9E-89   |
|                                         |                 |                     |                          |                     | >gb AAC05511.1  acireductone dioxygenase 1 [Oryza sativa]                                                                                                                                                                                                                                                                                                                                                 | 199   | 2E-81   |
|                                         |                 |                     |                          |                     | >gb AAT35818.1  abscisic stress ripening protein-like protein [Musa acuminata]                                                                                                                                                                                                                                                                                                                            | 143   | 3E-13   |
| BM073756                                | 1.14E-04        | F1=Mo17<B73         | 2.49                     | 9                   | >gb AAX96480.1  abscisic acid- and stress-induced protein - rice [Oryza sativa(japonica cultivar-group)] gb AAX92999.1  abscisic acid- and stress-induced protein - rice [Oryza sativa (japonica cultivar-group)] gb AAB96681.1  abscisic acid- and stress-inducible protein [Oryza sativa] gb ABA91705.1  abscisic acid- and stress-induced protein [Oryza sativa (japonica cultivar-group)]             | 138   | 8E-13   |
|                                         |                 |                     |                          |                     | >gb AAR23420.1  ASR protein [Ginkgo biloba]                                                                                                                                                                                                                                                                                                                                                               | 181   | 1E-12   |
|                                         |                 |                     |                          |                     | >gb AAT57940.1  22 kDa drought-inducible protein [Saccharum hybrid cultivar]dbj BAB68268.1  drought inducible 22 kD protein [Saccharum officinarum]                                                                                                                                                                                                                                                       | 142   | 4E-12   |
|                                         |                 |                     |                          |                     | >gb AAB02692.1  LP3-1                                                                                                                                                                                                                                                                                                                                                                                     | 126   | 1E-10   |
|                                         |                 |                     |                          |                     | >gb AAL24473.1  beta-expansin OsEXPB11 [Oryza sativa]                                                                                                                                                                                                                                                                                                                                                     | 292   | 1E-28   |
|                                         |                 |                     |                          |                     | >ref XP_467145.1  putative beta-expansin [Oryza sativa (japonica cultivar-group)]dbj BAD25736.1  putative beta-expansin [Oryza sativa (japonica cultivar-group)] dbj BAD25773.1  putative beta-expansin [Oryza sativa (japonica cultivar-group)]                                                                                                                                                          | 292   | 1E-28   |
|                                         |                 |                     |                          |                     | >dbj BAD06319.1  putative beta-expansin [Triticum aestivum]                                                                                                                                                                                                                                                                                                                                               | 289   | 1E-20   |
| BM334196                                | 1.17E-04        | Mo17<F1<B73         | 1.56                     | 10                  | >gb AAK56127.1  beta-expansin 4 [Zea mays]                                                                                                                                                                                                                                                                                                                                                                | 308   | 3E-20   |
|                                         |                 |                     |                          |                     | >gb AAS48886.1  expansin EXPB9 [Triticum aestivum]                                                                                                                                                                                                                                                                                                                                                        | 289   | 4E-20   |
|                                         |                 |                     |                          |                     | >ref NP_917838.1  putative chloroplast 50S ribosomal protein L31 [Oryza sativa(japonica cultivar-group)] dbj BAB90423.1  chloroplast 50S ribosomal protein L31-like [Oryza sativa (japonica cultivar-group)] dbj BAB90722.1  chloroplast 50S ribosomal protein L31-like [Oryza sativa (japonica cultivar-group)]                                                                                          | 135   | 6E-56   |
|                                         |                 |                     |                          |                     | >gb AAC77927.1  similar to chloroplast 50S ribosomal protein L31 [Medicago sativa]                                                                                                                                                                                                                                                                                                                        | 133   | 2E-23   |
|                                         |                 |                     |                          |                     | >ref NP_565109.1  EMB2184; structural constituent of ribosome [Arabidopsis thaliana]gb AAL15224.1  putative chloroplast 50S ribosomal protein L31 [Arabidopsis thaliana] gb AAK44041.1  putative chloroplast 50S ribosomal protein L31 [Arabidopsis thaliana] gb AAM65248.1  chloroplast 50S ribosomal protein L31, putative [Arabidopsis thaliana] gb AAG13073.1  Unknown protein [Arabidopsis thaliana] | 144   | 6E-23   |
|                                         |                 |                     |                          |                     | >ref YP_477812.1  ribosomal protein L31 [Cyanobacteria bacterium Yellowstone B-Prime]                                                                                                                                                                                                                                                                                                                     | 74    | 1E-15   |
|                                         |                 |                     |                          |                     | >ref YP_474877.1  ribosomal protein L31 [Cyanobacteria bacterium Yellowstone A-Prime]gb ABC99614.1  ribosomal protein L31 [Cyanobacteria bacterium Yellowstone A-Prime]                                                                                                                                                                                                                                   | 73    | 5E-15   |
| CB381450                                | 1.19E-04        | Mo17<F1<B73         | 1.5                      | 10                  | >dbj BAD22765.1  glycoprotein [Bromus inermis]                                                                                                                                                                                                                                                                                                                                                            | 134   | 7E-66   |
|                                         |                 |                     |                          |                     | >ref XP_466813.1  putative hydroxyproline-rich glycoprotein 1 [Oryza sativa (japonica cultivar-group)] dbj BAD21553.1  putative hydroxyproline-rich glycoprotein 1 [Oryza sativa (japonica cultivar-group)] dbj BAD22517.1  putative hydroxyproline-rich glycoprotein 1 [Oryza sativa (japonica cultivar-group)]                                                                                          | 134   | 1E-65   |
|                                         |                 |                     |                          |                     | >ref XP_473172.1  OSJNBb0070J16.13 [Oryza sativa (japonica cultivar-group)]emb CAE01917.2  OSJNBb0070J16.13 [Oryza sativa (japonica cultivar-group)]                                                                                                                                                                                                                                                      | 134   | 2E-65   |
|                                         |                 |                     |                          |                     | emb CAE02348.2  OSJNBb0072M01.9 [Oryza sativa (japonica cultivar-group)]                                                                                                                                                                                                                                                                                                                                  | 134   | 2E-65   |
|                                         |                 |                     |                          |                     | >gb ABA40467.1  glycoprotein-like protein [Solanum tuberosum]                                                                                                                                                                                                                                                                                                                                             | 134   | 7E-60   |
| >dbj BA83469.1  Csf-1 [Cucumis sativus] | 138             | 3E-56               |                          |                     |                                                                                                                                                                                                                                                                                                                                                                                                           |       |         |
| DV491489                                | 1.19E-04        | Mo17<B73=F1         | 2.2                      | 10                  | ns                                                                                                                                                                                                                                                                                                                                                                                                        |       |         |
| CD484569                                | 1.22E-04        | B73<F1<Mo17         | 1.47                     | 3                   | >emb CAA05772.1  Ubiquitin carrier protein [Zea mays]                                                                                                                                                                                                                                                                                                                                                     | 169   | 1E-28   |
|                                         |                 |                     |                          |                     | >ref XP_475366.1  putative ubiquitin-conjugating enzyme E2 [Oryza sativa (japonica cultivar-group)] gb AAT39166.1  putative ubiquitin-conjugating enzyme E2 [Oryza sativa (japonica cultivar-group)]                                                                                                                                                                                                      | 169   | 2E-28   |
|                                         |                 |                     |                          |                     | >gb AAC12662.1  ubiquitin-conjugating enzyme protein E2 [Zea mays]                                                                                                                                                                                                                                                                                                                                        | 169   | 2E-28   |
|                                         |                 |                     |                          |                     | >ref NP_915413.1  putative Ubiquitin carrier protein UBC7 [Oryza sativa (japonica cultivar-group)] dbj BAB93210.1  putative ubiquitin carrier protein UBC7 [Oryza sativa (japonica cultivar-group)] dbj BAB67890.1  putative ubiquitin carrier protein UBC7 [Oryza sativa (japonica cultivar-group)]                                                                                                      | 169   | 5E-28   |
|                                         |                 |                     |                          |                     | >sp P25868 UBC7 WHEAT Ubiquitin-conjugating enzyme E2 7 (Ubiquitin-protein ligase 7)(Ubiquitin carrier protein 7)                                                                                                                                                                                                                                                                                         | 168   | 4E-26   |
| CB815767                                | 1.26E-04        | Mo17<B73=F1         | 1.5                      | 11                  | >gb ABA97248.1  jacalin homolog [Oryza sativa (japonica cultivar-group)]gb ABB51090.1  mannose-specific jacalin-related lectin [Oryza sativa (japonica cultivar-group)]                                                                                                                                                                                                                                   | 306   | 6E-29   |
|                                         |                 |                     |                          |                     | >gb ABA96667.1  jacalin homolog [Oryza sativa (japonica cultivar-group)]                                                                                                                                                                                                                                                                                                                                  | 307   | 4E-27   |
|                                         |                 |                     |                          |                     | >gb AAR20919.1  jasmonate-induced protein [Triticum aestivum]                                                                                                                                                                                                                                                                                                                                             | 304   | 5E-27   |
|                                         |                 |                     |                          |                     | >gb AAA87041.1  putative 32.6 kDa jasmonate-induced protein [Hordeum vulgare]gb AAB72096.1  32 kDa protein [Hordeum vulgare]                                                                                                                                                                                                                                                                              | 304   | 7E-27   |
|                                         |                 |                     |                          |                     | >gb AAF71261.2  beta-glucosidase aggregating factor precursor [Zea mays]                                                                                                                                                                                                                                                                                                                                  | 306   | 9E-27   |
| DV489556                                | 1.27E-04        | B73=F1<Mo17         | 1.7                      | 4                   | >emb CAE17316.1  villin 1 [Nicotiana tabacum]                                                                                                                                                                                                                                                                                                                                                             | 559   | 4E-20   |
|                                         |                 |                     |                          |                     | >gb AAD54660.1  actin bundling protein ABP135 [Lilium longiflorum]                                                                                                                                                                                                                                                                                                                                        | 965   | 2E-18   |

**Table 4. Microarray analysis results, mode of gene action classification, and BLAST annotation for the 1,367 ESTs identified as differentially expressed among genotypes (15% FDR)**

| GenBank accession no. | Overall P value | Significant pattern | Fold change <sup>†</sup> | Sector <sup>‡</sup> | BLAST annotation*                                                                                                                                                                                                                                                                                                                                                                                      | Score | E value |
|-----------------------|-----------------|---------------------|--------------------------|---------------------|--------------------------------------------------------------------------------------------------------------------------------------------------------------------------------------------------------------------------------------------------------------------------------------------------------------------------------------------------------------------------------------------------------|-------|---------|
|                       |                 |                     |                          |                     | >emb CAE17317.1  villin 2 [Nicotiana tabacum]                                                                                                                                                                                                                                                                                                                                                          | 520   | 4E-18   |
|                       |                 |                     |                          |                     | >ref NP_567048.1  VLN3 (VILLIN 3); actin binding [Arabidopsis thaliana]                                                                                                                                                                                                                                                                                                                                | 965   | 1E-16   |
|                       |                 |                     |                          |                     | >emb CAB68147.1  villin 3 fragment [Arabidopsis thaliana]pir T45819 villin 3 homolog F28O9.260 - Arabidopsis thaliana (fragment)                                                                                                                                                                                                                                                                       | 383   | 1E-16   |
| CD568560              | 1.27E-04        | Mo17<B73=F1         | 1.55                     | 10                  | >ref XP_464690.1  Elongation factor 1-gamma [Oryza sativa (japonica cultivar-group)]dbj BAD17615.1  Elongation factor 1-gamma [Oryza sativa (japonica cultivar-group)] sp Q9ZRI7 EF1G ORYSA Elongation factor 1-gamma (EF-1-gamma) (eEF-1B gamma) dbj BAA34206.1  elongation factor 1B gamma [Oryza                                                                                                    | 418   | 4E-33   |
|                       |                 |                     |                          |                     | >gb AAO72574.1  elongation factor 1 gamma-like protein [Oryza sativa (japonica cultivar-group)]                                                                                                                                                                                                                                                                                                        | 409   | 9E-33   |
|                       |                 |                     |                          |                     | >ref XP_464689.1  putative elongation factor 1-gamma [Oryza sativa (japonica cultivar-group)] dbj BAD17614.1  putative elongation factor 1-gamma [Oryza sativa (japonica cultivar-group)]                                                                                                                                                                                                              | 414   | 9E-33   |
|                       |                 |                     |                          |                     | >gb AAO72563.1  elongation factor 1 gamma-like protein [Oryza sativa (japonica cultivar-group)]                                                                                                                                                                                                                                                                                                        | 413   | 3E-32   |
|                       |                 |                     |                          |                     | >dbj BAD61932.1  putative elongation factor 1 gamma [Oryza sativa (japonica cultivar-group)] dbj BAD61828.1  putative elongation factor 1 gamma [Oryza sativa (japonica cultivar-group)]                                                                                                                                                                                                               | 416   | 3E-32   |
| BG874123              | 1.28E-04        | Mo17<F1<B73         | 1.74                     | 9                   | ns                                                                                                                                                                                                                                                                                                                                                                                                     |       |         |
| CB351652              | 1.28E-04        | Mo17<F1<B73         | 1.58                     | 9                   | >gb AAT08007.1  putative zinc finger protein [Zea mays]                                                                                                                                                                                                                                                                                                                                                | 303   | 2E-6    |
| CD484490              | 1.34E-04        | Mo17<B73=F1         | 1.47                     | 10                  | >dbj BAD54480.1  putative tRNA intron endonuclease [Oryza sativa (japonica cultivar-group)] dbj BAD54220.1  putative tRNA intron endonuclease [Oryza sativa (japonica cultivar-group)] sp Q5Z6B1 SEN2 ORYSA Probable tRNA-splicing endonuclease subunit Sen2 (tRNA-intron endonuclease Sen2)                                                                                                           | 293   | 5E-33   |
|                       |                 |                     |                          |                     | >gb ABA94597.1  tRNA intron endonuclease, catalytic C-terminal domain, putative [Oryza sativa (japonica cultivar-group)]                                                                                                                                                                                                                                                                               | 292   | 6E-32   |
|                       |                 |                     |                          |                     | >ref NP_190145.1  ATSEN1 (SPLICING ENDONUCLEASE 1); tRNA-intron endonuclease [Arabidopsis thaliana] emb CAB75488.1  putative protein [Arabidopsis thaliana] dbj BAD94688.1  putative protein [Arabidopsis thaliana] sp Q9M1E8 SEN21_ARATH tRNA-splicing endonuclease subunit Sen2-1 (AtSen1) (tRNA-intron endonuclease Sen2-1)                                                                         | 237   | 4E-12   |
|                       |                 |                     |                          |                     | >dbj BAA88628.1  tRNA intron endonuclease [Arabidopsis thaliana]dbj BAA88627.1  tRNA intron endonuclease [Arabidopsis thaliana]                                                                                                                                                                                                                                                                        | 237   | 5E-12   |
|                       |                 |                     |                          |                     | >ref NP_974966.1  SEN2 (SPLICING ENDONUCLEASE 2); tRNA-intron endonuclease [Arabidopsis thaliana]                                                                                                                                                                                                                                                                                                      | 255   | 3E-11   |
| BM073434              | 1.36E-04        | F1<B73=Mo17         | 2.05                     | 6                   | >gb AAC25630.1  pathogenesis related protein-5 [Zea mays]gb ABA34043.1  pathogenesis-related protein 5 [Zea mays subsp. parviglumis]                                                                                                                                                                                                                                                                   | 172   | 5E-66   |
|                       |                 |                     |                          |                     | >gb ABA34036.1  pathogenesis-related protein 5 [Zea mays subsp. parviglumis]gb ABA34035.1  pathogenesis-related protein 5 [Zea mays subsp. parviglumis]                                                                                                                                                                                                                                                |       |         |
|                       |                 |                     |                          |                     | gb ABA34034.1  pathogenesis-related protein 5 [Zea mays subsp. parviglumis] gb ABA34033.1  pathogenesis-related protein 5 [Zea mays subsp. parviglumis] prf I1906392A thaumatin-like protein                                                                                                                                                                                                           | 174   | 5E-66   |
|                       |                 |                     |                          |                     | >gb ABA34044.1  pathogenesis-related protein 5 [Zea mays subsp. parviglumis]gb ABA34041.1  pathogenesis-related protein 5 [Zea mays subsp. parviglumis]                                                                                                                                                                                                                                                | 174   | 1E-65   |
|                       |                 |                     |                          |                     | >gb ABA34042.1  pathogenesis-related protein 5 [Zea mays subsp. parviglumis]gb ABA34040.1  pathogenesis-related protein 5 [Zea mays subsp. parviglumis]                                                                                                                                                                                                                                                |       |         |
|                       |                 |                     |                          |                     | gb ABA34038.1  pathogenesis-related protein 5 [Zea mays subsp. parviglumis] gb ABA34037.1  pathogenesis-related protein 5 [Zea mays subsp. parviglumis]                                                                                                                                                                                                                                                | 174   | 5E-63   |
|                       |                 |                     |                          |                     | >gb ABA34032.1  pathogenesis-related protein 5 [Zea mays subsp. parviglumis]                                                                                                                                                                                                                                                                                                                           | 176   | 5E-63   |
| DV491669              | 1.37E-04        | Mo17<F1<B73         | 2.13                     | 9                   | >ref XP_466191.1  putative suppressor of actin 1 [Oryza sativa (japonica cultivar-group)] dbj BAD33306.1  inositol 5-phosphatase 3-like protein [Oryza sativa (japonica cultivar-group)]                                                                                                                                                                                                               | 597   | 4E-47   |
|                       |                 |                     |                          |                     | >gb AAX96819.1  Similar to SAC domain protein 7 [Oryza sativa (japonica cultivar-group)] gb ABA92882.1  SAC domain protein 7, putative [Oryza sativa (japonica cultivar-group)]                                                                                                                                                                                                                        | 311   | 7E-37   |
|                       |                 |                     |                          |                     | >ref NP_190714.2  phosphoinositide 5-phosphatase [Arabidopsis thaliana]gb AAP49840.1  SAC domain protein 7 [Arabidopsis thaliana] gb AAK64136.1  unknown protein [Arabidopsis thaliana] gb AAK25977.1  unknown protein [Arabidopsis thaliana] gb AAP41368.1  SAC1-like protein AtSAC1c [Arabidopsis thaliana]                                                                                          | 597   | 3E-24   |
|                       |                 |                     |                          |                     | >gb AAP49839.1  SAC domain protein 6 [Arabidopsis thaliana]gb AAP41367.1  SAC1-like protein AtSAC1b [Arabidopsis thaliana]                                                                                                                                                                                                                                                                             | 593   | 2E-22   |
|                       |                 |                     |                          |                     | >dbj BAB10407.1  unnamed protein product [Arabidopsis thaliana]                                                                                                                                                                                                                                                                                                                                        | 626   | 2E-22   |
| DV942182              | 1.37E-04        | Mo17<B73=F1         | 2.58                     | 10                  | ns                                                                                                                                                                                                                                                                                                                                                                                                     |       |         |
| CB886283              | 1.38E-04        | Mo17<B73=F1         | 1.85                     | 10                  | >ref XP_482379.1  putative RNA binding protein [Oryza sativa (japonica cultivar-group)] ref XP_507581.1  PREDICTED OSJNBa0007M04.13 gene product [Oryza sativa (japonica cultivar-group)] ref XP_507230.1  PREDICTED OSJNBa0007M04.13 gene product [Oryza sativa (japonica cultivar-group)] dbj BAC99692.1  putative RNA binding protein [Oryza sativa (japonica cultivar-group)]                      | 214   | 2E-72   |
|                       |                 |                     |                          |                     | >emb CAE00870.1  TA8 protein [Oryza sativa (japonica cultivar-group)]                                                                                                                                                                                                                                                                                                                                  | 197   | 2E-64   |
|                       |                 |                     |                          |                     | >gb AAL76994.1  RNA binding protein [Elaeis oleifera]                                                                                                                                                                                                                                                                                                                                                  | 218   | 1E-60   |
|                       |                 |                     |                          |                     | >gb ABB87134.1  RNA binding protein-like protein [Solanum tuberosum]                                                                                                                                                                                                                                                                                                                                   | 217   | 6E-59   |
|                       |                 |                     |                          |                     | >ref NP_196080.1  RNA binding / nucleic acid binding [Arabidopsis thaliana]emb CAB85566.1  rna binding protein-like [Arabidopsis thaliana] gb AAM67546.1  putative RNA binding protein [Arabidopsis thaliana] gb AAL36178.1  putative rna binding protein [Arabidopsis thaliana] gb AAL06954.1  AT5g04600/T32M21_200 [Arabidopsis thaliana] gb AAK55702.1  AT5g04600/T32M21_200 [Arabidopsis thaliana] | 222   | 1E-49   |
| CD568722              | 1.41E-04        | Mo17<F1<B73         | 1.53                     | 10                  | >gb AAP80664.1  S28 ribosomal protein [Triticum aestivum]                                                                                                                                                                                                                                                                                                                                              | 86    | 5E-25   |
|                       |                 |                     |                          |                     | >emb CAA04565.1  rpS28 [Hordeum vulgare subsp. vulgare]                                                                                                                                                                                                                                                                                                                                                | 65    | 3E-24   |
|                       |                 |                     |                          |                     | >emb CAA57636.1  small subunit ribosomal protein S28 [Zea mays]sp P46302 RS28 MAIZE 40S ribosomal protein S28                                                                                                                                                                                                                                                                                          | 65    | 4E-24   |
|                       |                 |                     |                          |                     | >emb CAA10103.1  ribosomal protein S28 [Prunus persica]emb CAA10102.1  ribosomal protein S28 [Prunus persica] emb CAA10101.1  ribosomal protein S28 [Prunus persica]                                                                                                                                                                                                                                   | 65    | 1E-22   |

**Table 4. Microarray analysis results, mode of gene action classification, and BLAST annotation for the 1,367 ESTs identified as differentially expressed among genotypes (15% FDR)**

| GenBank accession no. | Overall P value | Significant pattern | Fold change <sup>†</sup> | Sector <sup>‡</sup> | BLAST annotation*                                                                                                                                                                                                                                                                                                                                                                                    | Score | E value |
|-----------------------|-----------------|---------------------|--------------------------|---------------------|------------------------------------------------------------------------------------------------------------------------------------------------------------------------------------------------------------------------------------------------------------------------------------------------------------------------------------------------------------------------------------------------------|-------|---------|
| CB886238              | 1.41E-04        | Mo17<F1<B73         | 1.88                     | 10                  | >gb AAM78552.1  ribosomal protein small subunit 28 [Helianthus annuus]                                                                                                                                                                                                                                                                                                                               | 65    | 4E-22   |
|                       |                 |                     |                          |                     | >ref XP_482526.1  putative dihydrolipoamide acetyltransferase [Oryza sativa (japonica cultivar-group)] dbj BAC99341.1  putative dihydrolipoamide acetyltransferase [Oryza sativa (japonica cultivar-group)] dbj BAD01179.1  putative dihydrolipoamide acetyltransferase [Oryza sativa (japonica cultivar-group)]                                                                                     | 475   | 5E-89   |
|                       |                 |                     |                          |                     | >gb AAK76609.2  putative dihydrolipoamide S-acetyltransferase [Arabidopsis thaliana]                                                                                                                                                                                                                                                                                                                 | 369   | 6E-84   |
|                       |                 |                     |                          |                     | >dbj BAB01047.1  dihydrolipoamide S-acetyltransferase [Arabidopsis thaliana]                                                                                                                                                                                                                                                                                                                         | 432   | 6E-84   |
|                       |                 |                     |                          |                     | >ref NP_189215.1  LTA2 (PLASTID E2 SUBUNIT OF PYRUVATE DECARBOXYLASE); acyltransferase/ dihydrolipoyllysine-residue acetyltransferase/ protein binding [Arabidopsis thaliana] gb AAK59863.1  AT3g25860/MPE11_1 [Arabidopsis thaliana] gb AAN86176.1  putative dihydrolipoamide S-acetyltransferase [Arabidopsis thaliana] gb AAD55139.1  dihydrolipoamide S-acetyltransferase [Arabidopsis thaliana] | 480   | 6E-84   |
| CA998647              | 1.43E-04        | Mo17<B73=F1         | 1.33                     | 11                  | >dbj BAD36253.1  putative mono-lipoyl E2 [Oryza sativa (japonica cultivar-group)]                                                                                                                                                                                                                                                                                                                    | 501   | 2E-79   |
|                       |                 |                     |                          |                     | >gb AAF71261.2  beta-glucosidase aggregating factor precursor [Zea mays]                                                                                                                                                                                                                                                                                                                             | 306   | 3E-40   |
|                       |                 |                     |                          |                     | >gb ABA96667.1  jacalin homolog [Oryza sativa (japonica cultivar-group)]                                                                                                                                                                                                                                                                                                                             | 307   | 9E-38   |
|                       |                 |                     |                          |                     | >gb AAR20919.1  jasmonate-induced protein [Triticum aestivum]                                                                                                                                                                                                                                                                                                                                        | 304   | 1E-36   |
|                       |                 |                     |                          |                     | >gb AAA87042.1  putative 32.7 kDa jasmonate-induced protein [Hordeum vulgare] gb AAB72097.1  32 kDa protein [Hordeum vulgare]                                                                                                                                                                                                                                                                        | 304   | 2E-36   |
| CB251903              | 1.50E-04        | Mo17<B73=F1         | 1.82                     | 10                  | >gb AAB72098.1  32 kDa protein [Hordeum vulgare]                                                                                                                                                                                                                                                                                                                                                     | 306   | 2E-35   |
|                       |                 |                     |                          |                     | >emb CAA46876.1  DNA-binding protein [Zea mays] pir T03640 high mobility group protein MNB1b - maize (fragment)                                                                                                                                                                                                                                                                                      | 168   | 1E-22   |
|                       |                 |                     |                          |                     | >gb AAM95942.1  nucleosome/chromatin assembly factor group D protein [Zea mays] emb CAA41220.1  high mobility group protein [Zea mays] emb CAB46752.1  HMGB protein [Zea mays] sp P27347 MNB1B MAIZE DNA-binding protein MNB1B (HMG1-like protein)                                                                                                                                                   | 157   | 4E-22   |
|                       |                 |                     |                          |                     | >gb AAP21609.1  HMGB1 [Oryza sativa (indica cultivar-group)] gb AAN28722.1  HMG1 protein [Oryza sativa (indica cultivar-group)] dbj BAD61823.1  HMGB1 [Oryza sativa (japonica cultivar-group)] gb AAC78104.1  high mobility group protein [Oryza sativa]                                                                                                                                             | 157   | 7E-21   |
|                       |                 |                     |                          |                     | >emb CAA77641.1  high mobility group protein [Triticum aestivum] sp P40621 HMGL WHEAT HMG1/2-like protein                                                                                                                                                                                                                                                                                            | 161   | 3E-20   |
| CD661736              | 1.51E-04        | Mo17<F1<B73         | 1.43                     | 10                  | >emb CAA90679.1  HMG1/2-like protein [Hordeum vulgare subsp. vulgare]                                                                                                                                                                                                                                                                                                                                | 160   | 2E-19   |
|                       |                 |                     |                          |                     | >emb CAE05511.1  OSJNBa0038P21.4 [Oryza sativa (japonica cultivar-group)]                                                                                                                                                                                                                                                                                                                            | 221   | 4E-70   |
|                       |                 |                     |                          |                     | >sp Q08069 RS8 MAIZE 40S ribosomal protein S8 gb AAB06330.1  ribosomal protein S8                                                                                                                                                                                                                                                                                                                    | 221   | 3E-67   |
|                       |                 |                     |                          |                     | >ref XP_465742.1  putative 40S ribosomal protein S8 [Oryza sativa (japonica cultivar-group)] ref XP_506804.1  PREDICTED P0483C08.42 gene product [Oryza sativa (japonica cultivar-group)] dbj BAD21871.1  putative 40S ribosomal protein S8 [Oryza sativa (japonica cultivar-group)] dbj BAD21876.1  putative 40S ribosomal protein S8 [Oryza sativa (japonica cultivar-group)]                      | 220   | 4E-67   |
|                       |                 |                     |                          |                     | >sp P49199 RS8 ORYZA 40S ribosomal protein S8 dbj BAA07207.1  ribosomal protein S8 [Oryza sativa (japonica cultivar-group)]                                                                                                                                                                                                                                                                          | 220   | 5E-63   |
| CB605494              | 1.53E-04        | B73<F1=Mo17         | 1.64                     | 3                   | >gb ABA46755.1  unknown [Solanum tuberosum]                                                                                                                                                                                                                                                                                                                                                          | 224   | 2E-62   |
|                       |                 |                     |                          |                     | >gb AAW88509.1  beta-tubulin [Lolium perenne]                                                                                                                                                                                                                                                                                                                                                        | 321   | 6E-85   |
|                       |                 |                     |                          |                     | >emb CAA55021.1  beta tubulin [Oryza sativa (japonica cultivar-group)]                                                                                                                                                                                                                                                                                                                               | 383   | 6E-85   |
|                       |                 |                     |                          |                     | >emb CAE52517.1  beta tubulin [Setaria viridis]                                                                                                                                                                                                                                                                                                                                                      | 448   | 6E-85   |
|                       |                 |                     |                          |                     | >emb CAE52516.1  beta tubulin [Setaria viridis]                                                                                                                                                                                                                                                                                                                                                      | 448   | 6E-85   |
| CD573372              | 1.56E-04        | Mo17<B73=F1         | 1.68                     | 10                  | >gb AAL92118.1  beta-tubulin [Gossypium hirsutum] gb AAL92026.1  tubulin beta-1 [Gossypium hirsutum]                                                                                                                                                                                                                                                                                                 | 445   | 6E-85   |
|                       |                 |                     |                          |                     | >ref XP_475712.1  putative GTP-binding protein Rab7a [Oryza sativa (japonica cultivar-group)] gb AAT01314.1  putative GTP-binding protein Rab7a [Oryza sativa (japonica cultivar-group)]                                                                                                                                                                                                             | 206   | e-110   |
|                       |                 |                     |                          |                     | >sp Q40787 RAB7 PENCL Ras-related protein Rab7 (Possible apospory-associated protein) gb AAA85273.1  possible apospory-associated protein                                                                                                                                                                                                                                                            | 206   | e-110   |
|                       |                 |                     |                          |                     | >gb AAO67728.1  small GTP binding protein [Oryza sativa (indica cultivar-group)]                                                                                                                                                                                                                                                                                                                     | 206   | e-109   |
|                       |                 |                     |                          |                     | >sp O24461 RAB7 PRUAR Ras-related protein Rab7 gb AAB71504.1  Rab7 GTP binding protein [Prunus armeniaca]                                                                                                                                                                                                                                                                                            | 207   | e-103   |
| BM073340              | 1.64E-04        | B73<F1=Mo17         | 2.92                     | 3                   | >emb CAA98171.1  RAB7D [Lotus corniculatus var. japonicus]                                                                                                                                                                                                                                                                                                                                           | 207   | e-102   |
|                       |                 |                     |                          |                     | >gb AAB47967.1  nonspecific lipid transfer protein [Hordeum vulgare]                                                                                                                                                                                                                                                                                                                                 | 96    | 5E-23   |
|                       |                 |                     |                          |                     | >ref XP_475853.1  putative lipid transfer protein [Oryza sativa (japonica cultivar-group)] gb AAT39264.1  putative lipid transfer protein [Oryza sativa (japonica cultivar-group)]                                                                                                                                                                                                                   | 94    | 6E-22   |
|                       |                 |                     |                          |                     | >ref NP_564532.1  lipid binding [Arabidopsis thaliana] gb AAM14109.1  putative lipid transfer protein [Arabidopsis thaliana] gb AAK76553.1  putative lipid transfer protein [Arabidopsis thaliana]                                                                                                                                                                                                   | 94    | 3E-16   |
|                       |                 |                     |                          |                     | >gb AAG60123.1  lipid transfer protein, putative [Arabidopsis thaliana]                                                                                                                                                                                                                                                                                                                              | 87    | 3E-16   |
| CD568718              | 1.66E-04        | Mo17<F1<B73         | 1.6                      | 10                  | >ref XP_475855.1  putative lipid transfer protein [Oryza sativa (japonica cultivar-group)] gb AAT85180.1  putative lipid transfer protein [Oryza sativa (japonica cultivar-group)] gb AAT39266.1  putative lipid transfer protein [Oryza sativa (japonica cultivar-group)]                                                                                                                           | 96    | 5E-16   |
|                       |                 |                     |                          |                     | >ref XP_473550.1  OSJNBa0088I22.17 [Oryza sativa (japonica cultivar-group)] emb CAE75904.1  OSJNBa0088I22.17 [Oryza sativa (japonica cultivar-group)]                                                                                                                                                                                                                                                | 464   | 1E-75   |
|                       |                 |                     |                          |                     | >gb AAB71261.2  beta-glucosidase aggregating factor precursor [Zea mays]                                                                                                                                                                                                                                                                                                                             | 306   | 7E-36   |
|                       |                 |                     |                          |                     | >gb ABA96667.1  jacalin homolog [Oryza sativa (japonica cultivar-group)]                                                                                                                                                                                                                                                                                                                             | 307   | 9E-36   |
|                       |                 |                     |                          |                     | >gb AAR20919.1  jasmonate-induced protein [Triticum aestivum]                                                                                                                                                                                                                                                                                                                                        | 304   | 1E-34   |
| CAB29976              | 1.67E-04        | Mo17<B73=F1         | 1.7                      | 11                  | >gb ABA97248.1  jacalin homolog [Oryza sativa (japonica cultivar-group)] gb ABB51090.1  mannose-specific jacalin-related lectin [Oryza sativa (japonica cultivar-group)]                                                                                                                                                                                                                             | 306   | 2E-34   |

**Table 4. Microarray analysis results, mode of gene action classification, and BLAST annotation for the 1,367 ESTs identified as differentially expressed among genotypes (15% FDR)**

| GenBank accession no.                                                                                                    | Overall P value | Significant pattern | Fold change <sup>†</sup> | Sector <sup>‡</sup> | BLAST annotation*                                                                                                                                                                                                                                                                                                                                                                                                                                                   | Score | E value |
|--------------------------------------------------------------------------------------------------------------------------|-----------------|---------------------|--------------------------|---------------------|---------------------------------------------------------------------------------------------------------------------------------------------------------------------------------------------------------------------------------------------------------------------------------------------------------------------------------------------------------------------------------------------------------------------------------------------------------------------|-------|---------|
| CB380870                                                                                                                 | 1.68E-04        | Mo17<B73<F1         | 1.44                     | 11                  | >gb AAA87041.1  putative 32.6 kDa jasmonate-induced protein [Hordeum vulgare]gb AAB72096.1  32 kDa protein [Hordeum vulgare]                                                                                                                                                                                                                                                                                                                                        | 304   | 2E-34   |
|                                                                                                                          |                 |                     |                          |                     | >gb AAA87042.1  putative 32.7 kDa jasmonate-induced protein [Hordeum vulgare]gb AAB72097.1  32 kDa protein [Hordeum vulgare]                                                                                                                                                                                                                                                                                                                                        | 304   | 6E-19   |
|                                                                                                                          |                 |                     |                          |                     | >gb ABA96667.1  jacalin homolog [Oryza sativa (japonica cultivar-group)]                                                                                                                                                                                                                                                                                                                                                                                            | 307   | 1E-18   |
|                                                                                                                          |                 |                     |                          |                     | >gb AAB72098.1  32 kDa protein [Hordeum vulgare]                                                                                                                                                                                                                                                                                                                                                                                                                    | 306   | 2E-18   |
|                                                                                                                          |                 |                     |                          |                     | >gb AAA87041.1  putative 32.6 kDa jasmonate-induced protein [Hordeum vulgare]gb AAB72096.1  32 kDa protein [Hordeum vulgare]                                                                                                                                                                                                                                                                                                                                        | 304   | 2E-18   |
|                                                                                                                          |                 |                     |                          |                     | >gb ABA96669.1  jakalin homolog [Oryza sativa (japonica cultivar-group)]                                                                                                                                                                                                                                                                                                                                                                                            | 258   | 6E-17   |
| BG841183                                                                                                                 | 1.69E-04        | Mo17<B73=F1         | 1.59                     | 10                  | >gb AAU10802.1  'putative endo-1,3;1,4-beta-D-glucanase' [Oryza sativa (japonica cultivar-group)]                                                                                                                                                                                                                                                                                                                                                                   | 240   | 4E-32   |
|                                                                                                                          |                 |                     |                          |                     | >gb AAU10803.1  'putative endo-1,3;1,4-beta-D-glucanase' [Oryza sativa (japonica cultivar-group)]                                                                                                                                                                                                                                                                                                                                                                   | 239   | 3E-29   |
|                                                                                                                          |                 |                     |                          |                     | >ref NP_566732.1  hydrolase [Arabidopsis thaliana]gb AAM19921.1  AT3g23600/MDB19_9 [Arabidopsis thaliana] gb AAL3604.1  AT3g23600/MDB19_9 [Arabidopsis thaliana] gb AAM61180.1  contains similarity to endo-1,3-1,4-beta-D-glucanase [Arabidopsis thaliana] dbj BAB02778.1  unnamed protein product [Arabidopsis thaliana]                                                                                                                                          | 239   | 3E-21   |
|                                                                                                                          |                 |                     |                          |                     | >ref XP_480878.1  putative Endo-1,3;1,4-beta-D-glucanase precursor [Oryza sativa (japonica cultivar-group)] dbj BAD05237.1  putative Endo-1,3;1,4-beta-D-glucanase precursor [Oryza sativa (japonica cultivar-group)] dbj BAD05479.1  putative Endo-1,3;1,4-beta-D-glucanase precursor [Oryza sativa (japonica cultivar-group)]                                                                                                                                     | 265   | 2E-20   |
|                                                                                                                          |                 |                     |                          |                     | >gb AAX92844.1  Dielactone hydrolase family, putative [Oryza sativa (japonica cultivar-group)] gb ABA92619.1  Dielactone hydrolase family, putative [Oryza sativa (japonica cultivar-group)]                                                                                                                                                                                                                                                                        | 276   | 2E-20   |
|                                                                                                                          |                 |                     |                          |                     | >gb AAP80664.1  S28 ribosomal protein [Triticum aestivum]                                                                                                                                                                                                                                                                                                                                                                                                           | 86    | 1E-25   |
| CD661929                                                                                                                 | 1.70E-04        | Mo17<F1<B73         | 1.62                     | 9                   | >emb CAA04565.1  rpS28 [Hordeum vulgare subsp. vulgare]                                                                                                                                                                                                                                                                                                                                                                                                             | 65    | 9E-25   |
|                                                                                                                          |                 |                     |                          |                     | >emb CAA57636.1  small subunit ribosomal protein S28 [Zea mays]sp P46302 RS28 MAIZE 40S ribosomal protein S28                                                                                                                                                                                                                                                                                                                                                       | 65    | 1E-24   |
|                                                                                                                          |                 |                     |                          |                     | >emb CAA10103.1  ribosomal protein S28 [Prunus persica]emb CAA10102.1  ribosomal protein S28 [Prunus persica] emb CAA10101.1  ribosomal protein S28 [Prunus persica]                                                                                                                                                                                                                                                                                                | 65    | 4E-23   |
|                                                                                                                          |                 |                     |                          |                     | >gb AAM78552.1  ribosomal protein small subunit 28 [Helianthus annuus]                                                                                                                                                                                                                                                                                                                                                                                              | 65    | 1E-22   |
|                                                                                                                          |                 |                     |                          |                     | >gb AAM47587.1  unknown protein [Sorghum bicolor]                                                                                                                                                                                                                                                                                                                                                                                                                   | 153   | 5E-39   |
|                                                                                                                          |                 |                     |                          |                     | >ref NP_196413.1  unknown protein [Arabidopsis thaliana]emb CAB62608.1  putative protein [Arabidopsis thaliana] gb AAM64297.1  unknown [Arabidopsis thaliana] gb AAO42799.1  At5g07960 [Arabidopsis thaliana] dbj BAB09960.1  unnamed protein product [Arabidopsis thaliana] sp Q9SD88 U139_ARATH UPF0139 protein At5g07960                                                                                                                                         | 107   | 8E-37   |
| BM080659                                                                                                                 | 1.81E-04        | Mo17<B73=F1         | 1.74                     | 10                  | >ref XP_469825.1  unknown protein [Oryza sativa (japonica cultivar-group)]gb AAK16184.1  unknown protein [Oryza sativa (japonica cultivar-group)]                                                                                                                                                                                                                                                                                                                   | 93    | 1E-34   |
|                                                                                                                          |                 |                     |                          |                     | >ref XP_643471.1  hypothetical protein DDB0217686 [Dictyostelium discoideum]gb AAO53170.1  hypothetical protein [Dictyostelium discoideum]                                                                                                                                                                                                                                                                                                                          | 98    | 3E-9    |
|                                                                                                                          |                 |                     |                          |                     | gb EAL69675.1  hypothetical protein DDB0217686 [Dictyostelium discoideum]                                                                                                                                                                                                                                                                                                                                                                                           | 108   | 4E-8    |
|                                                                                                                          |                 |                     |                          |                     | >gb AAF16694.1  unknown [Manduca sexta]sp Q9U516 U139 MANSE Hypothetical UPF0139 protein pMSmaA27                                                                                                                                                                                                                                                                                                                                                                   | 200   | 9E-37   |
|                                                                                                                          |                 |                     |                          |                     | >gb AAV43816.1  unknown protein [Oryza sativa (japonica cultivar-group)]                                                                                                                                                                                                                                                                                                                                                                                            | 197   | 1E-21   |
|                                                                                                                          |                 |                     |                          |                     | >gb ABA81879.1  unknown [Solanum tuberosum]                                                                                                                                                                                                                                                                                                                                                                                                                         | 203   | 9E-18   |
| BM073845                                                                                                                 | 1.83E-04        | Mo17<B73=F1         | 2.73                     | 10                  | >ref NP_175926.1  transcription factor [Arabidopsis thaliana]gb AAT71971.1  At1g55300 [Arabidopsis thaliana] gb AAR28024.1  TAF7 [Arabidopsis thaliana] gb AAR25638.1  At1g55300 [Arabidopsis thaliana] gb AAG51559.1  Serine/arginine-rich protein, putative; 48931-50251 [Arabidopsis thaliana]                                                                                                                                                                   | 239   | 2E-16   |
|                                                                                                                          |                 |                     |                          |                     | >ref NP_001031194.1  transcription factor [Arabidopsis thaliana]                                                                                                                                                                                                                                                                                                                                                                                                    | 193   | 1E-14   |
|                                                                                                                          |                 |                     |                          |                     | >dbj BAD68329.1  TATA-binding protein-associated factor TAFII55-like [Oryza sativa(japonica cultivar-group)]                                                                                                                                                                                                                                                                                                                                                        | 279   | 7E-29   |
|                                                                                                                          |                 |                     |                          |                     | >emb CAH68542.2  OSJNBa0009P12.20 [Oryza sativa (japonica cultivar-group)]                                                                                                                                                                                                                                                                                                                                                                                          | 255   | 2E-22   |
|                                                                                                                          |                 |                     |                          |                     | >ref XP_467255.1  unknown protein [Oryza sativa (japonica cultivar-group)]dbj BAD07702.1  unknown protein [Oryza sativa (japonica cultivar-group)]                                                                                                                                                                                                                                                                                                                  | 264   | 9E-17   |
|                                                                                                                          |                 |                     |                          |                     | dbj BAD07902.1  unknown protein [Oryza sativa (japonica cultivar-group)]                                                                                                                                                                                                                                                                                                                                                                                            | 264   | 9E-17   |
| DV494229                                                                                                                 | 1.83E-04        | B73<F1=Mo17         | 1.35                     | 3                   | >gb AAM65735.1  unknown [Arabidopsis thaliana]                                                                                                                                                                                                                                                                                                                                                                                                                      | 264   | 9E-17   |
|                                                                                                                          |                 |                     |                          |                     | >dbj BAD44266.1  unknown protein [Arabidopsis thaliana]                                                                                                                                                                                                                                                                                                                                                                                                             | 264   | 9E-17   |
|                                                                                                                          |                 |                     |                          |                     | >dbj BAD43504.1  unknown protein [Arabidopsis thaliana]                                                                                                                                                                                                                                                                                                                                                                                                             | 264   | 9E-17   |
|                                                                                                                          |                 |                     |                          |                     | >gb AAU44177.1  putative actin [Oryza sativa (japonica cultivar-group)]                                                                                                                                                                                                                                                                                                                                                                                             | 377   | 7E-72   |
|                                                                                                                          |                 |                     |                          |                     | >ref XP_470336.1  actin [Oryza sativa (japonica cultivar-group)]gb AAR88568.1  actin [Oryza sativa (japonica cultivar-group)] sp P17299 ACT3 ORYSA Actin-3                                                                                                                                                                                                                                                                                                          | 377   | 7E-72   |
|                                                                                                                          |                 |                     |                          |                     | >ref NP_196543.1  ACT7 [Arabidopsis thaliana]gb AAM20037.1  putative actin 2/7 protein [Arabidopsis thaliana] gb AAL36336.1  putative ACTIN 2/7 protein [Arabidopsis thaliana] gb AAM53337.1  actin 2/7 [Arabidopsis thaliana] gb AAM47998.1  ACTIN 2/7 [Arabidopsis thaliana] gb AAL32780.1  ACTIN 2/7 [Arabidopsis thaliana] dbj BAB09402.1  ACTIN 2/7 [Arabidopsis thaliana] sp P53492 ACT7_ARATH Actin-7 (Actin-2) gb AAB52506.1  actin7 gb AAA80356.1  actin-2 | 377   | 2E-71   |
| >gb AAW78915.1  actin [Triticum aestivum]gb AAW78911.1  actin [Triticum turgidum] gb AAN59956.1  actin [Hordeum vulgare] | 377             | 2E-71               |                          |                     |                                                                                                                                                                                                                                                                                                                                                                                                                                                                     |       |         |
| >gb AAV83799.1  putative actin 1 [Chorispora bungeana]                                                                   | 363             | 2E-71               |                          |                     |                                                                                                                                                                                                                                                                                                                                                                                                                                                                     |       |         |
| DV621976                                                                                                                 | 1.84E-04        | B73<F1=Mo17         | 1.59                     | 2                   | ns                                                                                                                                                                                                                                                                                                                                                                                                                                                                  |       |         |
| DV490246                                                                                                                 | 1.95E-04        | F1=Mo17<B73         | 1.6                      | 9                   | >gb AAC37357.1  catalasesp P18123 CATA3 MAIZE Catalase isozyme 3                                                                                                                                                                                                                                                                                                                                                                                                    | 496   | 6E-18   |
|                                                                                                                          |                 |                     |                          |                     | >emb CAH61266.1  catalase [Secale cereale]                                                                                                                                                                                                                                                                                                                                                                                                                          | 494   | 8E-13   |

**Table 4. Microarray analysis results, mode of gene action classification, and BLAST annotation for the 1,367 ESTs identified as differentially expressed among genotypes (15% FDR)**

| GenBank accession no. | Overall P value | Significant pattern | Fold change <sup>†</sup> | Sector <sup>‡</sup> | BLAST annotation*                                                                                                                                                                                                                                                                                                                                                                                                                                          | Score | E value |
|-----------------------|-----------------|---------------------|--------------------------|---------------------|------------------------------------------------------------------------------------------------------------------------------------------------------------------------------------------------------------------------------------------------------------------------------------------------------------------------------------------------------------------------------------------------------------------------------------------------------------|-------|---------|
|                       |                 |                     |                          |                     | >gb AAC17730.1  catalase 2 [Hordeum vulgare]                                                                                                                                                                                                                                                                                                                                                                                                               | 394   | 2E-12   |
|                       |                 |                     |                          |                     | >sp P55308 CATA2 HORVU Catalase isozyme 2gb AAA96948.1  catalase                                                                                                                                                                                                                                                                                                                                                                                           | 494   | 2E-12   |
|                       |                 |                     |                          |                     | >ref XP_463870.1  catalase (EC 1.11.1.6) catA-like protein [Oryza sativa (japonica cultivar-group)] dbj BAD07712.1  catalase catA-like protein [Oryza sativa (japonica cultivar-group)] dbj BAD07937.1  catalase catA-like protein [Oryza sativa (japonica cultivar-group)]                                                                                                                                                                                | 153   | 6E-11   |
| CB816143              | 2.02E-04        | Mo17<B73=F1         | 1.64                     | 10                  | ns                                                                                                                                                                                                                                                                                                                                                                                                                                                         |       |         |
|                       |                 |                     |                          |                     | >ref XP_479153.1  elongation factor 1 beta [Oryza sativa (japonica cultivar-group)]ref XP_506463.1  PREDICTED P0616D06.117 gene product [Oryza sativa (japonica cultivar-group)] dbj BAC16499.1  elongation factor 1 beta [Oryza sativa (japonica cultivar-group)] dbj BAA04903.1  elongation factor 1 beta [Oryza sativa (japonica cultivar-group)] sp Q40680 EF1D ORYSA Elongation factor 1-delta (EF-1-delta) (Elongation factor 1B-beta) (eEF-1B beta) | 229   | 7E-45   |
| CD484515              | 2.04E-04        | Mo17<B73=F1         | 1.46                     | 10                  | >gb AAU89237.1  elongation factor 1 beta 2 [Oryza sativa (japonica cultivar-group)]dbj BAA34599.1  elongation factor 1 beta 2 [Oryza sativa (japonica cultivar-group)] dbj BAA34598.1  elongation factor 1 beta 2 [Oryza sativa (japonica cultivar-group)]                                                                                                                                                                                                 | 226   | 7E-40   |
|                       |                 |                     |                          |                     | >emb CAB90214.1  putative elongation factor 1 beta [Hordeum vulgare subsp. vulgare]                                                                                                                                                                                                                                                                                                                                                                        | 226   | 5E-39   |
|                       |                 |                     |                          |                     | >gb AAR15081.1  translational elongation factor 1 subunit Bbeta [Pisum sativum]                                                                                                                                                                                                                                                                                                                                                                            | 231   | 5E-38   |
|                       |                 |                     |                          |                     | >sp P93447 EF1D_PIMBR Elongation factor 1-delta (EF-1-delta) (Elongation factor 1B-beta)(eEF-1B beta) gb AAB68395.1  elongation factor 1-beta [Pimpinella brachycarpa]                                                                                                                                                                                                                                                                                     | 226   | 6E-37   |
| DV621200              | 2.06E-04        | B73<F1=Mo17         | 1.4                      | 3                   | >ref XP_479905.1  unknown protein [Oryza sativa (japonica cultivar-group)]dbj BAD08860.1  unknown protein [Oryza sativa (japonica cultivar-group)]                                                                                                                                                                                                                                                                                                         | 184   | 2E-31   |
|                       |                 |                     |                          |                     | >ref NP_176927.1  unknown protein [Arabidopsis thaliana]gb AAM63870.1  unknown [Arabidopsis thaliana] gb AAG28897.1  F12A21.27 [Arabidopsis thaliana]                                                                                                                                                                                                                                                                                                      | 163   | 6E-23   |
|                       |                 |                     |                          |                     | >gb AAM63820.1  unknown [Arabidopsis thaliana]                                                                                                                                                                                                                                                                                                                                                                                                             | 168   | 2E-22   |
|                       |                 |                     |                          |                     | >ref NP_564215.1  unknown protein [Arabidopsis thaliana]                                                                                                                                                                                                                                                                                                                                                                                                   | 168   | 2E-22   |
|                       |                 |                     |                          |                     | >dbj BAD82112.1  unknown protein [Oryza sativa (japonica cultivar-group)]dbj BAD82771.1  unknown protein [Oryza sativa (japonica cultivar-group)]                                                                                                                                                                                                                                                                                                          | 171   | 1E-20   |
|                       |                 |                     |                          |                     | >gb AA95073.1  Fructose-bisphosphate aldolase class-I [Oryza sativa (japonica cultivar-group)] gb ABA91633.1  Fructose-bisphosphate aldolase class-I [Oryza sativa (japonica cultivar-group)]                                                                                                                                                                                                                                                              | 363   | 2E-16   |
| DV942638              | 2.07E-04        | Mo17<F1<B73         | 1.64                     | 9                   | >gb AAX95074.1  Fructose-bisphosphate aldolase class-I [Oryza sativa (japonica cultivar-group)] gb ABA91631.1  Fructose-bisphosphate aldolase class-I [Oryza sativa (japonica cultivar-group)]                                                                                                                                                                                                                                                             | 131   | 2E-16   |
|                       |                 |                     |                          |                     | >gb AAX95075.1  Fructose-bisphosphate aldolase class-I [Oryza sativa (japonica cultivar-group)] gb ABA91630.1  Fructose-bisphosphate aldolase class-I [Oryza sativa (japonica cultivar-group)]                                                                                                                                                                                                                                                             | 145   | 2E-16   |
|                       |                 |                     |                          |                     | >gb AAB70542.1  aldolase [Oryza sativa]                                                                                                                                                                                                                                                                                                                                                                                                                    | 362   | 2E-16   |
|                       |                 |                     |                          |                     | >gb AAX95072.1  Fructose-bisphosphate aldolase class-I [Oryza sativa (japonica cultivar-group)] gb ABA91632.1  Fructose-bisphosphate aldolase class-I [Oryza sativa (japonica cultivar-group)] sp Q40677 ALFC ORYSA Fructose-bisphosphate aldolase, chloroplast precursor (ALDP)                                                                                                                                                                           | 388   | 2E-16   |
| CD527416              | 2.08E-04        | Mo17<B73=F1         | 1.76                     | 10                  | >ref XP_470431.1  unknown protein [Oryza sativa (japonica cultivar-group)]gb AAO20079.1  unknown protein [Oryza sativa (japonica cultivar-group)]                                                                                                                                                                                                                                                                                                          | 158   | 2E-13   |
| CD058801              | 2.09E-04        | B73<F1=Mo17         | 1.38                     | 3                   | >gb ABA98247.1  Auxin response factor, putative [Oryza sativa (japonica cultivar-group)]                                                                                                                                                                                                                                                                                                                                                                   | 840   | 7E-27   |
|                       |                 |                     |                          |                     | >gb ABA98246.1  Auxin response factor, putative [Oryza sativa (japonica cultivar-group)]                                                                                                                                                                                                                                                                                                                                                                   | 841   | 7E-27   |
|                       |                 |                     |                          |                     | >gb AAG43286.2  putative auxin response factor 1 [Oryza sativa (indica cultivar-group)]                                                                                                                                                                                                                                                                                                                                                                    | 857   | 3E-26   |
|                       |                 |                     |                          |                     | >emb CAC83756.1  auxin response factor 1 [Oryza sativa (japonica cultivar-group)]                                                                                                                                                                                                                                                                                                                                                                          | 836   | 3E-26   |
|                       |                 |                     |                          |                     | >gb ABA93992.1  Auxin response factor, putative [Oryza sativa (japonica cultivar-group)]                                                                                                                                                                                                                                                                                                                                                                   | 811   | 3E-26   |
|                       |                 |                     |                          |                     | >ref XP_477553.1  putative cytochrome P450 71E1 [Oryza sativa (japonica cultivar-group)] dbj BAD31248.1  putative cytochrome P450 71E1 [Oryza sativa (japonica cultivar-group)] dbj BAC55732.1  putative cytochrome P450 71E1 [Oryza sativa (japonica cultivar-group)]                                                                                                                                                                                     | 538   | 1E-50   |
| DV490653              | 2.11E-04        | Mo17<F1<B73         | 3.44                     | 10                  | >gb AAC39318.1  cytochrome P450 CYP71E1 [Sorghum bicolor]sp O48958 C71E1_SORBI Cytochrome P450 71E1 (4-hydroxyphenylacetaldehyde oxime monooxygenase)                                                                                                                                                                                                                                                                                                      | 531   | 2E-41   |
|                       |                 |                     |                          |                     | >ref NP_910063.1  putative cytochrome P450 [Oryza sativa (japonica cultivar-group)]gb AAO37955.1  putative cytochrome P450 [Oryza sativa (japonica cultivar-group)] gb AAO20056.1  putative cytochrome P450 protein [Oryza sativa (japonica cultivar-group)]                                                                                                                                                                                               | 527   | 1E-39   |
|                       |                 |                     |                          |                     | >dbj BAB02437.1  cytochrome P450 [Arabidopsis thaliana]                                                                                                                                                                                                                                                                                                                                                                                                    | 434   | 2E-39   |
|                       |                 |                     |                          |                     | >ref NP_189247.1  CYP71B17; heme binding / iron ion binding / monooxygenase/ oxygenbinding [Arabidopsis thaliana] dbj BAB02436.1  cytochrome P450 [Arabidopsis thaliana] sp Q9LTM6 C71BH_ARATH Cytochrome P450 71B17                                                                                                                                                                                                                                       | 502   | 4E-38   |
| CB329795              | 2.11E-04        | B73<F1=Mo17         | 1.39                     | 3                   | >emb CAA55022.1  beta tubulin [Oryza sativa (japonica cultivar-group)]                                                                                                                                                                                                                                                                                                                                                                                     | 447   | 2E-72   |
|                       |                 |                     |                          |                     | >emb CAE52516.1  beta tubulin [Setaria viridis]                                                                                                                                                                                                                                                                                                                                                                                                            | 448   | 2E-72   |
|                       |                 |                     |                          |                     | >ref NP_915874.1  tubulin beta chain [Oryza sativa (japonica cultivar-group)]dbj BAB92274.1  beta-tubulin [Oryza sativa (japonica cultivar-group)]                                                                                                                                                                                                                                                                                                         |       |         |
|                       |                 |                     |                          |                     | dbj BAA06381.1  beta-tubulin [Oryza sativa (japonica cultivar-group)] sp P45960 TBB4 ORYSA Tubulin beta-4 chain (Beta-4 tubulin)                                                                                                                                                                                                                                                                                                                           | 447   | 2E-72   |
|                       |                 |                     |                          |                     | >gb AAA66495.1  beta-tubulin                                                                                                                                                                                                                                                                                                                                                                                                                               | 447   | 2E-72   |
|                       |                 |                     |                          |                     | >sp Q41783 TBB6 MAIZE Tubulin beta-6 chain (Beta-6 tubulin)gb AAA20186.1  beta-6 tubulin                                                                                                                                                                                                                                                                                                                                                                   | 446   | 2E-72   |
| CB815751              | 2.14E-04        | Mo17<F1<B73         | 1.57                     | 10                  | ns                                                                                                                                                                                                                                                                                                                                                                                                                                                         |       |         |
|                       |                 |                     |                          |                     | >ref XP_467076.1  chaperone protein dnaJ-like [Oryza sativa (japonica cultivar-group)] dbj BAD26566.1  chaperone protein dnaJ-like [Oryza sativa (japonica cultivar-group)]                                                                                                                                                                                                                                                                                | 332   | 3E-8    |



**Table 4. Microarray analysis results, mode of gene action classification, and BLAST annotation for the 1,367 ESTs identified as differentially expressed among genotypes (15% FDR)**

| GenBank accession no. | Overall P value | Significant pattern | Fold change <sup>†</sup> | Sector <sup>‡</sup> | BLAST annotation*                                                                                                                                                                                                                                                                                                                                                                                                                                                                                                                                                                                                                                               | Score | E value |
|-----------------------|-----------------|---------------------|--------------------------|---------------------|-----------------------------------------------------------------------------------------------------------------------------------------------------------------------------------------------------------------------------------------------------------------------------------------------------------------------------------------------------------------------------------------------------------------------------------------------------------------------------------------------------------------------------------------------------------------------------------------------------------------------------------------------------------------|-------|---------|
|                       |                 |                     |                          |                     | >ref NP_974975.1  unknown protein [Arabidopsis thaliana] ref NP_200975.1  unknown protein [Arabidopsis thaliana]  gb AAN31107.1  At5g61670/k11j9_190 [Arabidopsis thaliana]  gb AAM51301.1  unknown protein [Arabidopsis thaliana]  gb AAL38842.1  unknown protein [Arabidopsis thaliana]  gb AAM19804.1  AT5g61670/k11j9_190 [Arabidopsis thaliana]  gb AAM61134.1  unknown [Arabidopsis thaliana]  dbj BAB09011.1  unnamed protein product [Arabidopsis thaliana]  dbj BAD29300.1  chaperone protein dnaJ-related-like [Oryza sativa (japonica cultivar-group)]  dbj BAD27799.1  chaperone protein dnaJ-related-like [Oryza sativa (japonica cultivar-group)] | 307   | 3E-8    |
|                       |                 |                     |                          |                     | >ref NP_196231.2  unknown protein [Arabidopsis thaliana] gb AAM91684.1  unknown protein [Arabidopsis thaliana]  gb AAL59969.1  unknown protein [Arabidopsis thaliana]                                                                                                                                                                                                                                                                                                                                                                                                                                                                                           | 314   | 1E-7    |
|                       |                 |                     |                          |                     | >dbj BAA98202.1  unnamed protein product [Arabidopsis thaliana]                                                                                                                                                                                                                                                                                                                                                                                                                                                                                                                                                                                                 | 315   | 1E-6    |
| CD527794              | 2.16E-04        | Mo17<B73=F1         | 1.48                     | 10                  | >dbj BAA98202.1  unnamed protein product [Arabidopsis thaliana]                                                                                                                                                                                                                                                                                                                                                                                                                                                                                                                                                                                                 | 319   | 1E-6    |
|                       |                 |                     |                          |                     | >gb AAP92747.1  ribosomal L9-like protein [Oryza sativa (japonica cultivar-group)]                                                                                                                                                                                                                                                                                                                                                                                                                                                                                                                                                                              | 190   | 2E-77   |
|                       |                 |                     |                          |                     | >sp P49210 RL9 ORYSA 60S ribosomal protein L9 dbj BAA19798.1  YK426 [Oryza sativa]                                                                                                                                                                                                                                                                                                                                                                                                                                                                                                                                                                              | 190   | 2E-77   |
|                       |                 |                     |                          |                     | >ref XP_463799.1  putative 60S ribosomal protein L9 [Oryza sativa (japonica cultivar-group)]  dbj BAD07825.1  putative 60S ribosomal protein L9 [Oryza sativa (japonica cultivar-group)]                                                                                                                                                                                                                                                                                                                                                                                                                                                                        | 183   | 4E-75   |
|                       |                 |                     |                          |                     | >ref XP_506675.1  PREDICTED OJ1435 F07.31 gene product [Oryza sativa (japonica cultivar-group)]                                                                                                                                                                                                                                                                                                                                                                                                                                                                                                                                                                 | 192   | 4E-75   |
|                       |                 |                     |                          |                     | >gb ABA81856.1  unknown [Solanum tuberosum]                                                                                                                                                                                                                                                                                                                                                                                                                                                                                                                                                                                                                     | 194   | 6E-69   |
| CB834053              | 2.20E-04        | Mo17<B73=F1         | 1.68                     | 10                  | ns                                                                                                                                                                                                                                                                                                                                                                                                                                                                                                                                                                                                                                                              |       |         |
| CB604224              | 2.20E-04        | Mo17<B73=F1         | 1.59                     | 10                  | >emb CAI64400.1  thioredoxin h1 protein [Zea mays]                                                                                                                                                                                                                                                                                                                                                                                                                                                                                                                                                                                                              | 128   | 6E-60   |
|                       |                 |                     |                          |                     | >ref XP_475666.1  putative thioredoxin H-type (TRX-H) (TrxTa) [Oryza sativa (japonica cultivar-group)]  gb AAT44260.1  putative thioredoxin H-type (TRX-H) (TrxTa) [Oryza sativa (japonica cultivar-group)]                                                                                                                                                                                                                                                                                                                                                                                                                                                     | 121   | 2E-47   |
|                       |                 |                     |                          |                     | >dbj BAB20886.1  thioredoxin h [Oryza sativa (japonica cultivar-group)]                                                                                                                                                                                                                                                                                                                                                                                                                                                                                                                                                                                         | 121   | 2E-47   |
|                       |                 |                     |                          |                     | >gb AAF88067.1  thioredoxin H [Triticum aestivum] emb CAB96931.1  thioredoxin h [Triticum aestivum]                                                                                                                                                                                                                                                                                                                                                                                                                                                                                                                                                             | 125   | 6E-44   |
|                       |                 |                     |                          |                     | >gb AAP72291.1  thioredoxin h isoform 2; HvTrxh2 [Hordeum vulgare subsp. vulgare]                                                                                                                                                                                                                                                                                                                                                                                                                                                                                                                                                                               | 122   | 6E-44   |
| CD058888              | 2.23E-04        | B73<F1=Mo17         | 1.54                     | 3                   | >dbj BAC78569.1  katanin [Oryza sativa (japonica cultivar-group)] dbj BAD87507.1  katanin [Oryza sativa (japonica cultivar-group)]                                                                                                                                                                                                                                                                                                                                                                                                                                                                                                                              | 386   | 5E-33   |
|                       |                 |                     |                          |                     | >ref NP_916186.1  katanin p60 subunit A 1-like [Oryza sativa (japonica cultivar-group)]                                                                                                                                                                                                                                                                                                                                                                                                                                                                                                                                                                         | 428   | 3E-29   |
|                       |                 |                     |                          |                     | >dbj BAD73365.1  vacuolar protein sorting factor 4B-like [Oryza sativa (japonica cultivar-group)]  dbj BAD73312.1  vacuolar protein sorting factor 4B-like [Oryza sativa (japonica cultivar-group)]                                                                                                                                                                                                                                                                                                                                                                                                                                                             | 410   | 6E-20   |
|                       |                 |                     |                          |                     | >ref NP_916872.1  putative katanin [Oryza sativa (japonica cultivar-group)]                                                                                                                                                                                                                                                                                                                                                                                                                                                                                                                                                                                     | 411   | 6E-20   |
|                       |                 |                     |                          |                     | >ref NP_565791.1  ATP binding / ATPase/ nucleoside-triphosphatase/ nucleotide binding [Arabidopsis thaliana]  gb AAC26698.2  putative katanin [Arabidopsis thaliana]  gb AAM61422.1  putative katanin [Arabidopsis thaliana]                                                                                                                                                                                                                                                                                                                                                                                                                                    | 384   | 1E-11   |
| DV943338              | 2.39E-04        | Mo17<B73=F1         | 3.2                      | 10                  | ns                                                                                                                                                                                                                                                                                                                                                                                                                                                                                                                                                                                                                                                              |       |         |
| CB815724              | 2.41E-04        | B73<F1<Mo17         | 1.55                     | 3                   | >gb AAP85378.1  RNA binding protein Rp120 [Oryza sativa (japonica cultivar-group)] gb AAP85377.1  RNA binding protein Rp120 [Oryza sativa (japonica cultivar-group)]                                                                                                                                                                                                                                                                                                                                                                                                                                                                                            | 986   | 2E-61   |
|                       |                 |                     |                          |                     | >ref XP_466019.1  RNA binding protein Rp120 [Oryza sativa (japonica cultivar-group)] dbj BAD26152.1  RNA binding protein Rp120 [Oryza sativa (japonica cultivar-group)]  dbj BAD25376.1  RNA binding protein Rp120 [Oryza sativa (japonica cultivar-group)]                                                                                                                                                                                                                                                                                                                                                                                                     | 986   | 2E-61   |
|                       |                 |                     |                          |                     | >dbj BAC06184.1  110 kDa 4Snc-Tudor domain protein [Pisum sativum]                                                                                                                                                                                                                                                                                                                                                                                                                                                                                                                                                                                              | 989   | 6E-42   |
|                       |                 |                     |                          |                     | >dbj BAB32793.1  110 kDa 4Snc-Tudor domain protein [Pisum sativum]                                                                                                                                                                                                                                                                                                                                                                                                                                                                                                                                                                                              | 699   | 6E-42   |
|                       |                 |                     |                          |                     | >ref NP_196352.2  nuclease/ nucleic acid binding [Arabidopsis thaliana] gb AAL57629.1  AT5g07350/T2I1_60 [Arabidopsis thaliana]                                                                                                                                                                                                                                                                                                                                                                                                                                                                                                                                 | 991   | 6E-39   |
| DV550868              | 2.51E-04        | B73<F1<Mo17         | 3.64                     | 3                   | >dbj BAD37901.1  CREG2-protein-like [Oryza sativa (japonica cultivar-group)] dbj BAD37864.1  CREG2-protein-like [Oryza sativa (japonica cultivar-group)]                                                                                                                                                                                                                                                                                                                                                                                                                                                                                                        | 215   | 7E-14   |
| CB381221              | 2.51E-04        | Mo17<B73=F1         | 1.45                     | 10                  | ns                                                                                                                                                                                                                                                                                                                                                                                                                                                                                                                                                                                                                                                              |       |         |
| DV622653              | 2.51E-04        | Mo17<F1<B73         | 1.39                     | 9                   | >ref NP_568778.1  oxidoreductase, acting on NADH or NADPH [Arabidopsis thaliana] gb AAL79599.1  AT5g52840/MXC20_6 [Arabidopsis thaliana]  gb AAL06910.1  AT5g52840/MXC20_6 [Arabidopsis thaliana]  dbj BAB10432.1  unnamed protein product [Arabidopsis thaliana]  sp Q9FLX7 NUFM_ARATH Probable NADH-ubiquinone oxidoreductase 18 kDa subunit, mitochondrial precursor (Complex I-18Kd) (CI-18Kd)                                                                                                                                                                                                                                                              | 169   | 2E-40   |
|                       |                 |                     |                          |                     | >gb AAL32032.1  NADH-ubiquinone oxidoreductase [Retama raetam]                                                                                                                                                                                                                                                                                                                                                                                                                                                                                                                                                                                                  | 153   | 3E-38   |
|                       |                 |                     |                          |                     | >ref NP_680745.1  unknown protein [Arabidopsis thaliana]                                                                                                                                                                                                                                                                                                                                                                                                                                                                                                                                                                                                        | 115   | 6E-8    |
|                       |                 |                     |                          |                     | >gb AAU44524.1  hypothetical protein AT4G28005 [Arabidopsis thaliana]                                                                                                                                                                                                                                                                                                                                                                                                                                                                                                                                                                                           | 112   | 8E-8    |
|                       |                 |                     |                          |                     | >ref XP_504293.1  hypothetical protein [Yarrowia lipolytica] emb CAG79892.1  unnamed protein product [Yarrowia lipolytica CLIB122]                                                                                                                                                                                                                                                                                                                                                                                                                                                                                                                              | 146   | 6E-6    |
| DV622495              | 2.52E-04        | B73<F1<Mo17         | 1.56                     | 4                   | >gb ABA91469.1  long-chain acyl-CoA synthetase [Oryza sativa (japonica cultivar-group)]                                                                                                                                                                                                                                                                                                                                                                                                                                                                                                                                                                         | 709   | 4E-73   |
|                       |                 |                     |                          |                     | >gb ABA96460.1  long-chain acyl-CoA synthetase [Oryza sativa (japonica cultivar-group)]                                                                                                                                                                                                                                                                                                                                                                                                                                                                                                                                                                         | 683   | 7E-70   |
|                       |                 |                     |                          |                     | >gb ABA96459.1  long-chain acyl-CoA synthetase [Oryza sativa (japonica cultivar-group)]                                                                                                                                                                                                                                                                                                                                                                                                                                                                                                                                                                         | 707   | 7E-70   |
|                       |                 |                     |                          |                     | >gb AAM28873.1  long chain acyl-CoA synthetase 6 [Arabidopsis thaliana]                                                                                                                                                                                                                                                                                                                                                                                                                                                                                                                                                                                         | 701   | 2E-61   |
|                       |                 |                     |                          |                     | >dbj BAB40450.1  long-chain acyl-CoA synthetase [Arabidopsis thaliana]                                                                                                                                                                                                                                                                                                                                                                                                                                                                                                                                                                                          | 701   | 2E-61   |
| CD650760              | 2.56E-04        | Mo17<B73=F1         | 1.46                     | 10                  | >ref XP_475712.1  putative GTP-binding protein Rab7a [Oryza sativa (japonica cultivar-group)]  gb AAT01314.1  putative GTP-binding protein Rab7a [Oryza sativa (japonica cultivar-group)]                                                                                                                                                                                                                                                                                                                                                                                                                                                                       | 206   | 1E-69   |

**Table 4. Microarray analysis results, mode of gene action classification, and BLAST annotation for the 1,367 ESTs identified as differentially expressed among genotypes (15% FDR)**

| GenBank accession no. | Overall P value | Significant pattern | Fold change <sup>†</sup> | Sector <sup>‡</sup> | BLAST annotation*                                                                                                                                                                                                                                                                                                    | Score | E value |
|-----------------------|-----------------|---------------------|--------------------------|---------------------|----------------------------------------------------------------------------------------------------------------------------------------------------------------------------------------------------------------------------------------------------------------------------------------------------------------------|-------|---------|
|                       |                 |                     |                          |                     | >sp Q40787 RAB7 PENCIL Ras-related protein Rab7 (Possible apospory-associated protein)gb AAA85273.1  possible apospory-associated protein                                                                                                                                                                            | 206   | 1E-69   |
|                       |                 |                     |                          |                     | >gb AAO67728.1  small GTP binding protein [Oryza sativa (indica cultivar-group)]                                                                                                                                                                                                                                     | 206   | 3E-68   |
|                       |                 |                     |                          |                     | >sp O24461 RAB7 PRUAR Ras-related protein Rab7gb AAB71504.1  Rab7 GTP binding protein [Prunus armeniaca]                                                                                                                                                                                                             | 207   | 2E-61   |
|                       |                 |                     |                          |                     | >emb CAA98171.1  RAB7D [Lotus corniculatus var. japonicus]                                                                                                                                                                                                                                                           | 207   | 7E-61   |
| DV621279              | 2.57E-04        | Mo17<F1<B73         | 1.31                     | 9                   | >gb AAU44173.1  unknown protein [Oryza sativa (japonica cultivar-group)]                                                                                                                                                                                                                                             | 401   | 8E-60   |
|                       |                 |                     |                          |                     | >dbj BAA75685.1  WREBP-2 [Nicotiana tabacum]                                                                                                                                                                                                                                                                         | 371   | 1E-23   |
|                       |                 |                     |                          |                     | >ref XP_466167.1  putative WREBP-2 [Oryza sativa (japonica cultivar-group)]dbj BAD15483.1  putative WREBP-2 [Oryza sativa (japonica cultivar-group)]                                                                                                                                                                 | 342   | 9E-22   |
|                       |                 |                     |                          |                     | >dbj BAB83613.1  unknown protein [Arabidopsis thaliana]                                                                                                                                                                                                                                                              | 339   | 9E-22   |
|                       |                 |                     |                          |                     | >ref NP_849323.1  nucleic acid binding / zinc ion binding [Arabidopsis thaliana]                                                                                                                                                                                                                                     | 387   | 9E-22   |
| CD573009              | 2.61E-04        | Mo17<F1<B73         | 1.57                     | 10                  | ns                                                                                                                                                                                                                                                                                                                   |       |         |
| BG841731              | 2.66E-04        | Mo17<B73=F1         | 2.44                     | 10                  | >emb CAA46641.1  heat shock protein 17.2 [Zea mays]                                                                                                                                                                                                                                                                  | 152   | 6E-62   |
|                       |                 |                     |                          |                     | >emb CAA63901.1  heat shock protein 17.0 [Pennisetum glaucum]                                                                                                                                                                                                                                                        | 152   | 4E-55   |
|                       |                 |                     |                          |                     | >ref XP_462737.1  putative heat shock protein [Oryza sativa (japonica cultivar-group)] emb CAA43210.1  16.9 KD low molecular weight heat shock protein [Oryza sativa] dbj BAB64126.1  putative heat shock protein [Oryza sativa (japonica cultivar-group)] sp P27777 HSP11_ORYSA 16.9 kDa class I heat shock protein |       |         |
|                       |                 |                     |                          |                     | gb AAA33909.1  16.9 kDa heat shock protein prf 1908439A heat shock protein 16.9A                                                                                                                                                                                                                                     | 150   | 2E-54   |
|                       |                 |                     |                          |                     | >emb CAA63902.1  heat shock protein 16.9 [Pennisetum glaucum]                                                                                                                                                                                                                                                        | 150   | 3E-54   |
|                       |                 |                     |                          |                     | >ref XP_462738.1  putative heat shock protein [Oryza sativa (japonica cultivar-group)] dbj BAB64127.1  putative heat shock protein [Oryza sativa (japonica cultivar-group)] gb AAA33910.1  16.9 kDa heat shock protein prf 1908439B heat shock protein 16.9B                                                         | 150   | 3E-54   |
| BG842066              | 2.71E-04        | Mo17<B73=F1         | 1.59                     | 11                  | >gb AAB06331.1  novel protein                                                                                                                                                                                                                                                                                        | 143   | 1E-71   |
|                       |                 |                     |                          |                     | >gb AAD45283.1  unknown [Zea mays]                                                                                                                                                                                                                                                                                   | 128   | 1E-61   |
|                       |                 |                     |                          |                     | >ref XP_474394.1  OSJNBa0032F06.15 [Oryza sativa (japonica cultivar-group)]emb CAE03432.2  OSJNBa0032F06.15 [Oryza sativa (japonica cultivar-group)]                                                                                                                                                                 | 145   | 9E-55   |
|                       |                 |                     |                          |                     | >ref XP_466973.1  putative elicitor-responsive gene-3 [Oryza sativa (japonica cultivar-group)] dbj BAD25356.1  putative elicitor-responsive gene-3 [Oryza sativa (japonica cultivar-group)]                                                                                                                          | 143   | 1E-38   |
|                       |                 |                     |                          |                     | >gb AAM63058.1  putative elicitor-responsive gene [Arabidopsis thaliana]                                                                                                                                                                                                                                             | 147   | 4E-38   |
| DV492715              | 2.79E-04        | B73<F1=Mo17         | 1.7                      | 3                   | >gb ABA99609.1  hypothetical protein LOC_Os12g44170 [Oryza sativa (japonica cultivar-group)]                                                                                                                                                                                                                         | 859   | 4E-61   |
|                       |                 |                     |                          |                     | >ref NP_973860.1  ATP binding / damaged DNA binding [Arabidopsis thaliana]ref NP_173324.1  ATP binding / damaged DNA binding [Arabidopsis thaliana]                                                                                                                                                                  |       |         |
|                       |                 |                     |                          |                     | gb AAO50545.1  unknown protein [Arabidopsis thaliana] dbj BAC42129.1  unknown protein [Arabidopsis thaliana]                                                                                                                                                                                                         | 860   | 8E-51   |
|                       |                 |                     |                          |                     | >gb AAF79278.1  F14D16.2 [Arabidopsis thaliana]                                                                                                                                                                                                                                                                      | 977   | 8E-51   |
|                       |                 |                     |                          |                     | >ref NP_177613.1  ATP binding / damaged DNA binding [Arabidopsis thaliana]gb AAD55301.1  Contains 2 PF01535 DUF domains. [Arabidopsis thaliana]                                                                                                                                                                      | 855   | 3E-48   |
|                       |                 |                     |                          |                     | >ref NP_180698.1  ATP binding / damaged DNA binding [Arabidopsis thaliana]gb AAD26479.1  unknown protein [Arabidopsis thaliana]                                                                                                                                                                                      | 918   | 4E-7    |
| CD527329              | 2.84E-04        | Mo17<B73=F1         | 1.62                     | 10                  | >gb AAT74541.1  tyrosine-specific protein phosphatase protein [Oryza sativa]                                                                                                                                                                                                                                         | 225   | 5E-70   |
|                       |                 |                     |                          |                     | >ref NP_171993.1  phosphoprotein phosphatase [Arabidopsis thaliana]gb AAC97999.1  ESTs gb H36249, gb AA59732 and gb AA651219 come from this gene. [Arabidopsis thaliana] gb AAO63274.1  At1g05000 [Arabidopsis thaliana] sp Q9ZVN4 Y1500 ARATH Probable tyrosine-protein phosphatase At1g05000                       | 215   | 8E-62   |
|                       |                 |                     |                          |                     | >ref XP_450177.1  putative tyrosine specific protein phosphatase protein [Oryzasativa (japonica cultivar-group)] dbj BAD22288.1  putative tyrosine specific protein phosphatase protein [Oryza sativa (japonica cultivar-group)]                                                                                     | 222   | 1E-60   |
|                       |                 |                     |                          |                     | >pdb 1XRI B Chain B, X-Ray Structure Of A Putative Phosphoprotein Phosphatase From Arabidopsis Thaliana Gene At1g05000 pdb 1XRI A Chain A, X-Ray Structure Of A Putative Phosphoprotein Phosphatase From Arabidopsis Thaliana Gene At1g05000                                                                         | 151   | 2E-59   |
|                       |                 |                     |                          |                     | >gb AAX20039.1  tyrosine specific protein phosphatase family protein [Capsicumannuum]                                                                                                                                                                                                                                | 225   | 4E-59   |
| DV489704              | 2.88E-04        | Mo17<B73=F1         | 1.88                     | 10                  | >ref XP_472942.1  OSJNBa0081L15.18 [Oryza sativa (japonica cultivar-group)]emb CAE02006.2  OJ000223_09.8 [Oryza sativa (japonica cultivar-group)]                                                                                                                                                                    | 505   | 2E-83   |
|                       |                 |                     |                          |                     | emb CAE03156.2  OSJNBa0081L15.18 [Oryza sativa (japonica cultivar-group)]                                                                                                                                                                                                                                            | 505   | 2E-82   |
|                       |                 |                     |                          |                     | >gb AAL79959.1  glucose-6-phosphate dehydrogenase [Oryza sativa (japonica cultivar-group)]                                                                                                                                                                                                                           | 509   | 8E-82   |
|                       |                 |                     |                          |                     | >dbj BAA97664.1  glucose-6-phosphate dehydrogenase [Triticum aestivum]                                                                                                                                                                                                                                               | 509   | 5E-81   |
|                       |                 |                     |                          |                     | >dbj BAA97662.1  glucose-6-phosphate dehydrogenase [Triticum aestivum]                                                                                                                                                                                                                                               | 509   | 5E-81   |
|                       |                 |                     |                          |                     | >ref XP_466575.1  putative glucose-6-phosphate dehydrogenase [Oryza sativa (japonica cultivar-group)] dbj BAD22150.1  putative glucose-6-phosphate dehydrogenase [Oryza sativa (japonica cultivar-group)]                                                                                                            | 517   | 7E-81   |
| DV495282              | 2.91E-04        | B73<F1=Mo17         | 1.51                     | 3                   | ns                                                                                                                                                                                                                                                                                                                   |       |         |
| CD001799              | 2.95E-04        | Mo17<B73=F1         | 1.6                      | 10                  | ns                                                                                                                                                                                                                                                                                                                   |       |         |
| CB815390              | 3.06E-04        | Mo17<F1<B73         | 2.11                     | 10                  | >ref XP_473146.1  OSJNBa0004N05.10 [Oryza sativa (japonica cultivar-group)]emb CAE03386.2  OSJNBa0004N05.10 [Oryza sativa (japonica cultivar-group)]                                                                                                                                                                 | 465   | 3E-10   |
|                       |                 |                     |                          |                     | >ref NP_171899.1  unknown protein [Arabidopsis thaliana]gb AAD10667.1  Unknown protein [Arabidopsis thaliana]                                                                                                                                                                                                        | 418   | 7E-7    |
|                       |                 |                     |                          |                     | >ref NP_199217.1  unknown protein [Arabidopsis thaliana]gb AAP37859.1  At5g44040 [Arabidopsis thaliana] gb AAM20395.1  putative protein [Arabidopsis thaliana] dbj BAB09064.1  unnamed protein product [Arabidopsis thaliana]                                                                                        | 416   | 2E-6    |
| CD568379              | 3.13E-04        | Mo17<F1<B73         | 1.49                     | 10                  | >ref NP_922765.1  putative chloroplast-targeted beta-amylase [Oryza sativa (japonica cultivar-group)] gb AAG60205.1  putative chloroplast-targeted beta-amylase [Oryza sativa] gb AAP55052.1  chloroplast-targeted beta-amylase, putative [Oryza sativa (japonica cultivar-group)]                                   | 544   | 2E-28   |

**Table 4. Microarray analysis results, mode of gene action classification, and BLAST annotation for the 1,367 ESTs identified as differentially expressed among genotypes (15% FDR)**

| GenBank accession no. | Overall P value | Significant pattern | Fold change <sup>†</sup> | Sector <sup>‡</sup> | BLAST annotation*                                                                                                                                                                                                                                                                                                                                                                                          | Score | E value |
|-----------------------|-----------------|---------------------|--------------------------|---------------------|------------------------------------------------------------------------------------------------------------------------------------------------------------------------------------------------------------------------------------------------------------------------------------------------------------------------------------------------------------------------------------------------------------|-------|---------|
|                       |                 |                     |                          |                     | >emb CAI39244.1  beta-amylase [Glycine max]                                                                                                                                                                                                                                                                                                                                                                | 540   | 2E-19   |
|                       |                 |                     |                          |                     | >gb AAK84008.1  beta-amylase PCT-BMYI [Solanum tuberosum]                                                                                                                                                                                                                                                                                                                                                  | 545   | 7E-18   |
|                       |                 |                     |                          |                     | >emb CAB46051.1  putative beta-amylase [Arabidopsis thaliana]emb CAB80980.1  putative beta-amylase [Arabidopsis thaliana]                                                                                                                                                                                                                                                                                  | 498   | 6E-17   |
|                       |                 |                     |                          |                     | >ref NP_567523.1  CT-BMY; beta-amylase [Arabidopsis thaliana]emb CAB58423.1  beta-amylase enzyme [Arabidopsis thaliana] gb AAM65134.1  putative beta-amylase [Arabidopsis thaliana]                                                                                                                                                                                                                        | 548   | 6E-17   |
| CD568411              | 3.16E-04        | F1=Mo17<B73         | 1.78                     | 9                   | >dbj BAB10218.1  unnamed protein product [Arabidopsis thaliana]                                                                                                                                                                                                                                                                                                                                            | 454   | 2E-35   |
|                       |                 |                     |                          |                     | >ref NP_198810.2  oxidoreductase [Arabidopsis thaliana]gb AAP81799.1  At5g39940 [Arabidopsis thaliana] gb AAO00853.1  putative protein [Arabidopsis thaliana]                                                                                                                                                                                                                                              | 480   | 2E-35   |
|                       |                 |                     |                          |                     | >gb ABA99608.1  hypothetical protein LOC_Os12g44160 [Oryza sativa (japonica cultivar-group)]                                                                                                                                                                                                                                                                                                               | 418   | 5E-31   |
|                       |                 |                     |                          |                     | >gb ABA22117.1  Fumarate reductase/succinate dehydrogenase flavoprotein-like [Anabaena variabilis ATCC 29413] ref YP_323012.1  Fumarate reductase/succinate dehydrogenase flavoprotein-like [Anabaena variabilis ATCC 29413]                                                                                                                                                                               | 413   | 9E-24   |
|                       |                 |                     |                          |                     | >dbj BAB76255.1  all4556 [Nostoc sp. PCC 7120]ref NP_488596.1  hypothetical protein all4556 [Nostoc sp. PCC 7120]                                                                                                                                                                                                                                                                                          | 370   | 6E-23   |
| CB885354              | 3.18E-04        | Mo17<B73=F1         | 1.75                     | 10                  | >gb AAV50043.1  metallothionein-like protein [Saccharum hybrid cultivar]                                                                                                                                                                                                                                                                                                                                   | 81    | 7E-17   |
|                       |                 |                     |                          |                     | >ref NP_909265.1  putative metallothionein-like protein [Oryza sativa (japonica cultivar-group)] dbj BAD52374.1  metallothionein [Oryza rufipogon]                                                                                                                                                                                                                                                         |       |         |
|                       |                 |                     |                          |                     | dbj BAD52373.1  metallothionein [Oryza rufipogon] dbj BAD52372.1  metallothionein [Oryza rufipogon] dbj BAD52371.1  metallothionein [Oryza rufipogon]                                                                                                                                                                                                                                                      |       |         |
|                       |                 |                     |                          |                     | dbj BAD52370.1  metallothionein [Oryza rufipogon] dbj BAD52369.1  metallothionein [Oryza rufipogon] dbj BAD52368.1  metallothionein [Oryza rufipogon]                                                                                                                                                                                                                                                      |       |         |
|                       |                 |                     |                          |                     | dbj BAD52367.1  metallothionein [Oryza rufipogon] dbj BAD52366.1  metallothionein [Oryza rufipogon] dbj BAD52365.1  metallothionein [Oryza rufipogon]                                                                                                                                                                                                                                                      |       |         |
|                       |                 |                     |                          |                     | dbj BAD52364.1  metallothionein [Oryza rufipogon] dbj BAD52363.1  metallothionein [Oryza rufipogon] dbj BAD52362.1  metallothionein [Oryza rufipogon]                                                                                                                                                                                                                                                      |       |         |
|                       |                 |                     |                          |                     | dbj BAB44010.1  putative metallothionein-like protein [Oryza sativa (japonica cultivar-group)] dbj BAA14038.1  metallothionein-like protein [Oryza sativa]                                                                                                                                                                                                                                                 |       |         |
|                       |                 |                     |                          |                     | sp P94029 MT21 ORYSA Metallothionein-like protein type 2 gb AAC49627.1  metallothionein-like type 2                                                                                                                                                                                                                                                                                                        | 82    | 6E-15   |
|                       |                 |                     |                          |                     | >gb AAS88721.1  metallothionein-like protein [Cynodon dactylon]                                                                                                                                                                                                                                                                                                                                            | 81    | 1E-14   |
|                       |                 |                     |                          |                     | >emb CAB53392.1  metallothionein [Eichhornia crassipes]emb CAB53390.1  metallothionein [Eichhornia crassipes] emb CAA09025.1  unnamed protein product [Eichhornia crassipes] emb CAA09024.1  unnamed protein product [Eichhornia crassipes] emb CAA09023.1  unnamed protein product [Eichhornia crassipes]                                                                                                 | 77    | 4E-14   |
|                       |                 |                     |                          |                     | >gb AAT08692.1  type 2 metallothionein-like protein [Hyacinthus orientalis]                                                                                                                                                                                                                                                                                                                                | 85    | 2E-13   |
| DV491284              | 3.20E-04        | F1=Mo17<B73         | 1.54                     | 9                   | >ref NP_908456.1  unnamed protein product [Oryza sativa (japonica cultivar-group)]                                                                                                                                                                                                                                                                                                                         | 537   | 3E-15   |
|                       |                 |                     |                          |                     | >gb AAQ84111.1  Clt1 [Poncirus trifoliata]                                                                                                                                                                                                                                                                                                                                                                 | 54    | 5E-13   |
|                       |                 |                     |                          |                     | >dbj BAD34658.1  plasma membrane protein 3 [Leymus chinensis]                                                                                                                                                                                                                                                                                                                                              | 54    | 6E-13   |
|                       |                 |                     |                          |                     | >gb AAS72306.1  drought-induced hydrophobic protein [Oryza sativa (japonica cultivar-group)] gb AAM46894.1  early drought induced protein [Oryza sativa (indica cultivar-group)] sp Q6AT93 LTI6B_ORYSA Hydrophobic protein LTI6B (Low temperature-induced protein 6B) gb AAT37942.1  low temperature-induced low molecular weight integral membrane protein LTI6b [Oryza sativa (japonica cultivar-group)] | 55    | 6E-13   |
|                       |                 |                     |                          |                     | >gb AAV88601.1  low temperature and salt responsive protein [Pennisetum glaucum]                                                                                                                                                                                                                                                                                                                           | 56    | 8E-13   |
| DV549392              | 3.23E-04        | B73<F1=Mo17         | 1.58                     | 3                   | >gb AAV28626.1  Bet v I allergen [Zea mays]                                                                                                                                                                                                                                                                                                                                                                | 154   | 5E-61   |
|                       |                 |                     |                          |                     | >ref XP_472791.1  OSJNBb0048E02.12 [Oryza sativa (japonica cultivar-group)]emb CAD40936.1  OSJNBb0048E02.12 [Oryza sativa (japonica cultivar-group)]                                                                                                                                                                                                                                                       | 157   | 5E-49   |
|                       |                 |                     |                          |                     | >gb AAF87152.1  T23E23.17 [Arabidopsis thaliana]                                                                                                                                                                                                                                                                                                                                                           | 418   | 1E-23   |
|                       |                 |                     |                          |                     | >ref NP_173813.1  unknown protein [Arabidopsis thaliana]emb CAC83600.1  major latex-like protein [Arabidopsis thaliana] gb AAL31239.1  At1g24020/T23E23_22 [Arabidopsis thaliana] gb AAK96470.1  At1g24020/T23E23_22 [Arabidopsis thaliana] sp Q93VR4 ML423 ARATH MLP-like protein 423                                                                                                                     | 155   | 4E-23   |
|                       |                 |                     |                          |                     | >gb AAM65899.1  pollen allergen-like protein [Arabidopsis thaliana]                                                                                                                                                                                                                                                                                                                                        | 155   | 6E-23   |
| BM381047              | 3.24E-04        | Mo17<B73=F1         | 1.33                     | 10                  | ns                                                                                                                                                                                                                                                                                                                                                                                                         |       |         |
|                       |                 |                     |                          |                     | >ref XP_467724.1  unknown protein [Oryza sativa (japonica cultivar-group)]dbj BAD15772.1  unknown protein [Oryza sativa (japonica cultivar-group)]                                                                                                                                                                                                                                                         |       |         |
| CB605079              | 3.25E-04        | Mo17<F1<B73         | 1.45                     | 10                  | dbj BAD15729.1  unknown protein [Oryza sativa (japonica cultivar-group)]                                                                                                                                                                                                                                                                                                                                   | 181   | 4E-20   |
| CB239984              | 3.30E-04        | Mo17<B73=F1         | 1.84                     | 10                  | ns                                                                                                                                                                                                                                                                                                                                                                                                         |       |         |
| CB833959              | 3.34E-04        | Mo17<B73=F1         | 1.37                     | 10                  | ns                                                                                                                                                                                                                                                                                                                                                                                                         |       |         |
| BM074056              | 3.35E-04        | Mo17<B73=F1         | 4.72                     | 10                  | >ref XP_470719.1  putative polyprotein [Oryza sativa]gb AAL82521.1  putative polyprotein [Oryza sativa]                                                                                                                                                                                                                                                                                                    | 408   | 3E-13   |
|                       |                 |                     |                          |                     | >ref XP_472450.1  OSJNBb0108J11.11 [Oryza sativa (japonica cultivar-group)]emb CAE02919.3  OSJNBb0108J11.11 [Oryza sativa (japonica cultivar-group)]                                                                                                                                                                                                                                                       | 815   | 1E-12   |
|                       |                 |                     |                          |                     | >gb AAL68644.1  polyprotein [Oryza sativa (japonica cultivar-group)]                                                                                                                                                                                                                                                                                                                                       | 933   | 5E-12   |
|                       |                 |                     |                          |                     | >gb AAL76001.1  putative gag-pol polyprotein [Zea mays]                                                                                                                                                                                                                                                                                                                                                    | 2396  | 1E-11   |
|                       |                 |                     |                          |                     | >ref XP_471847.1  OSJNBb0062H02.17 [Oryza sativa (japonica cultivar-group)]emb CAE05600.2  OSJNBa0054D14.1 [Oryza sativa (japonica cultivar-group)] emb CAD40278.2  OSJNBb0062H02.17 [Oryza sativa (japonica cultivar-group)]                                                                                                                                                                              | 1629  | 1E-11   |
| CB380802              | 3.40E-04        | Mo17<B73=F1         | 1.36                     | 10                  | >gb AAT08750.1  ribosomal protein L7 [Hyacinthus orientalis]                                                                                                                                                                                                                                                                                                                                               | 129   | 3E-39   |
|                       |                 |                     |                          |                     | >gb AAM64816.1  Ribosomal protein L7Ae-like [Arabidopsis thaliana]                                                                                                                                                                                                                                                                                                                                         | 128   | 2E-38   |
|                       |                 |                     |                          |                     | >ref NP_197516.1  RNA binding / structural constituent of ribosome [Arabidopsis thaliana] gb AAM16174.1  AT5g20160/F5O24_50 [Arabidopsis thaliana] gb AAK82476.1  AT5g20160/F5O24_50 [Arabidopsis thaliana] gb AAM64557.1  ribosomal protein L7Ae-like [Arabidopsis thaliana]                                                                                                                              | 128   | 7E-38   |

**Table 4. Microarray analysis results, mode of gene action classification, and BLAST annotation for the 1,367 ESTs identified as differentially expressed among genotypes (15% FDR)**

| GenBank accession no. | Overall P value | Significant pattern | Fold change <sup>†</sup> | Sector <sup>‡</sup> | BLAST annotation*                                                                                                                                                                                                                                                                                                                                                                                                              | Score | E value |
|-----------------------|-----------------|---------------------|--------------------------|---------------------|--------------------------------------------------------------------------------------------------------------------------------------------------------------------------------------------------------------------------------------------------------------------------------------------------------------------------------------------------------------------------------------------------------------------------------|-------|---------|
|                       |                 |                     |                          |                     | >emb CAB79193.1  Ribosomal protein L7Ae-like (fragment) [Arabidopsis thaliana] emb CAB52812.1  Ribosomal protein L7Ae-like (fragment) [Arabidopsis thaliana]                                                                                                                                                                                                                                                                   | 108   | 1E-37   |
|                       |                 |                     |                          |                     | >ref NP_193969.1  RNA binding / structural constituent of ribosome [Arabidopsisthaliana]  gb AAM63731.1  Ribosomal protein L7Ae-like [Arabidopsis thaliana]                                                                                                                                                                                                                                                                    | 128   | 1E-37   |
| BG842466              | 3.44E-04        | Mo17<F1<B73         | 2.23                     | 10                  | >dbj BAD81539.1  hypothetical protein [Oryza sativa (japonica cultivar-group)] dbj BAD81466.1  hypothetical protein [Oryza sativa (japonica cultivar-group)]                                                                                                                                                                                                                                                                   | 70    | 1E-10   |
|                       |                 |                     |                          |                     | >gb AAM61511.1  unknown [Arabidopsis thaliana]                                                                                                                                                                                                                                                                                                                                                                                 | 70    | 2E-7    |
|                       |                 |                     |                          |                     | >gb AAO64205.1  unknown protein [Arabidopsis thaliana]                                                                                                                                                                                                                                                                                                                                                                         | 92    | 2E-7    |
| CB604802              | 3.67E-04        | F1=Mo17<B73         | 1.33                     | 9                   | >gb AAL73485.1  repressor protein [Oryza sativa]                                                                                                                                                                                                                                                                                                                                                                               | 296   | 3E-68   |
|                       |                 |                     |                          |                     | >gb AAL73486.1  repressor protein [Triticum aestivum]                                                                                                                                                                                                                                                                                                                                                                          | 312   | 5E-68   |
|                       |                 |                     |                          |                     | >emb CAB93720.1  DR1-like protein [Arabidopsis thaliana]                                                                                                                                                                                                                                                                                                                                                                       | 162   | 8E-58   |
|                       |                 |                     |                          |                     | >ref NP_001031927.1  unknown protein [Arabidopsis thaliana]                                                                                                                                                                                                                                                                                                                                                                    | 158   | 1E-57   |
|                       |                 |                     |                          |                     | >gb AAL73489.1  repressor protein [Glycine max]                                                                                                                                                                                                                                                                                                                                                                                | 156   | 5E-57   |
| BM336433              | 3.67E-04        | F1=Mo17<B73         | 1.36                     | 9                   | >emb CAA77595.1  Plastid ribosomal protein CL15 [Pisum sativum] sp P31165 RK15_PEA 50S ribosomal protein L15, chloroplast precursor (CL15)                                                                                                                                                                                                                                                                                     | 258   | 1E-39   |
|                       |                 |                     |                          |                     | >emb CAA77593.1  Plastid ribosomal protein CL15 [Arabidopsis thaliana] pir R5MUL5 ribosomal protein L15 precursor, chloroplast - Arabidopsis thaliana                                                                                                                                                                                                                                                                          | 277   | 7E-39   |
|                       |                 |                     |                          |                     | >ref NP_189221.1  RPL15 [Arabidopsis thaliana] gb AAL15231.1  putative 50S ribosomal protein L15, chloroplast precursor [Arabidopsis thaliana]                                                                                                                                                                                                                                                                                 |       |         |
|                       |                 |                     |                          |                     | gb AAK44050.1  putative 50S ribosomal protein L15, chloroplast precursor [Arabidopsis thaliana]  gb AAL11595.1  AT3g25920/MPE11_7 [Arabidopsis thaliana]                                                                                                                                                                                                                                                                       |       |         |
|                       |                 |                     |                          |                     | gb AAM61054.1  50S ribosomal protein L15, chloroplast precursor [Arabidopsis thaliana]  dbj BAB01055.1  chloroplast 50S ribosomal protein L15 [Arabidopsis thaliana]  sp P25873 RK15_ARATH 50S ribosomal protein L15, chloroplast precursor (CL15)                                                                                                                                                                             | 277   | 7E-39   |
|                       |                 |                     |                          |                     | >emb CAA77592.1  plastid ribosomal protein CL15 [Arabidopsis thaliana]                                                                                                                                                                                                                                                                                                                                                         | 273   | 7E-39   |
|                       |                 |                     |                          |                     | >dbj BAD80072.1  50S ribosomal protein L15 [Synechococcus elongatus PCC 6301] ref YP_172592.1  50S ribosomal protein L15 [Synechococcus elongatus PCC 6301]  ref YP_401232.1  ribosomal protein L15 [Synechococcus elongatus PCC 7942]  sp Q5N0U8 RL15_SYNP6 50S ribosomal protein L15  dbj BAA22466.1  50S ribosomal protein L15 [Synechococcus sp.]  gb ABB58245.1  ribosomal protein L15 [Synechococcus elongatus PCC 7942] | 147   | 7E-18   |
| CD528067              | 3.70E-04        | Mo17<B73=F1         | 1.31                     | 10                  | >dbj BAD28633.1  unknown protein [Oryza sativa (japonica cultivar-group)]                                                                                                                                                                                                                                                                                                                                                      | 291   | 1E-55   |
|                       |                 |                     |                          |                     | >gb AAU43966.1  unknown protein [Oryza sativa (japonica cultivar-group)]                                                                                                                                                                                                                                                                                                                                                       | 273   | 7E-42   |
|                       |                 |                     |                          |                     | >ref NP_565465.1  LCV1 [Arabidopsis thaliana] gb AAM91311.1  unknown protein [Arabidopsis thaliana]  gb AAD24400.2  expressed protein [Arabidopsis thaliana]  gb AAL62439.1  unknown protein [Arabidopsis thaliana]  gb AAM61503.1  unknown [Arabidopsis thaliana]                                                                                                                                                             | 256   | 2E-37   |
|                       |                 |                     |                          |                     | >gb AAM10356.1  At2g20120/T2G17.8 [Arabidopsis thaliana] gb AAK95310.1  At2g20120/T2G17.8 [Arabidopsis thaliana]                                                                                                                                                                                                                                                                                                               | 268   | 1E-36   |
|                       |                 |                     |                          |                     | >ref NP_565464.1  COV1 (CONTINUOUS VASCULAR RING) [Arabidopsis thaliana] gb AAD24385.1  expressed protein [Arabidopsis thaliana]  gb AAO41858.1  putative membrane protein COV [Arabidopsis thaliana]  gb AAM61543.1  unknown [Arabidopsis thaliana]                                                                                                                                                                           | 268   | 1E-36   |
| CB603818              | 3.78E-04        | Mo17<F1<B73         | 1.48                     | 9                   | ns                                                                                                                                                                                                                                                                                                                                                                                                                             |       |         |
| BM073205              | 3.83E-04        | B73<F1<Mo17         | 1.75                     | 4                   | >gb AAU03113.1  putative o-methyltransferase ZRP4 [Oryza sativa (japonicacultivar-group)]  gb AAT01304.1  putative o-methyltransferase ZRP4 [Oryza sativa (japonica cultivar-group)]                                                                                                                                                                                                                                           | 367   | 1E-36   |
|                       |                 |                     |                          |                     | >gb AAU03114.1  putative o-methyltransferase ZRP4 [Oryza sativa (japonicacultivar-group)]  gb AAT01305.1  putative o-methyltransferase ZRP4 [Oryza sativa (japonica cultivar-group)]                                                                                                                                                                                                                                           | 370   | 5E-36   |
|                       |                 |                     |                          |                     | >gb ABA98340.1  o-methyltransferase zrp4 [Oryza sativa (japonica cultivar-group)]                                                                                                                                                                                                                                                                                                                                              | 359   | 1E-34   |
|                       |                 |                     |                          |                     | >sp P47917 ZRP4_MAIZE O-methyltransferase ZRP4 (OMT) gb AAA18532.1  O-methyltransferase                                                                                                                                                                                                                                                                                                                                        | 364   | 8E-34   |
|                       |                 |                     |                          |                     | >gb ABA98018.1  caffeic acid methyl transferase, putative [Oryza sativa (japonicacultivar-group)]                                                                                                                                                                                                                                                                                                                              | 127   | 8E-33   |
| CB351677              | 3.89E-04        | Mo17<F1<B73         | 1.59                     | 10                  | >sp P05621 H2B2_WHEAT Histone H2B.2                                                                                                                                                                                                                                                                                                                                                                                            | 149   | 1E-36   |
|                       |                 |                     |                          |                     | >ref NP_909288.1  putative histone H2B [Oryza sativa (japonica cultivar-group)] dbj BAB44045.1  putative histone H2B [Oryza sativa (japonica cultivar-group)]                                                                                                                                                                                                                                                                  | 153   | 2E-36   |
|                       |                 |                     |                          |                     | dbj BAB03624.1  putative histone H2B [Oryza sativa (japonica cultivar-group)]                                                                                                                                                                                                                                                                                                                                                  |       |         |
|                       |                 |                     |                          |                     | >ref XP_475912.1  putative histone H2B [Oryza sativa (japonica cultivar-group)] gb AAU44113.1  putative histone H2B [Oryza sativa (japonica cultivar-group)]                                                                                                                                                                                                                                                                   | 152   | 3E-36   |
|                       |                 |                     |                          |                     | gb AAT69583.1  putative histone H2B [Oryza sativa (japonica cultivar-group)]                                                                                                                                                                                                                                                                                                                                                   | 124   | 3E-36   |
|                       |                 |                     |                          |                     | >ref XP_475367.1  putative histone H2B [Oryza sativa (japonica cultivar-group)] gb AAT39167.1  putative histone H2B [Oryza sativa (japonica cultivar-group)]                                                                                                                                                                                                                                                                   | 153   | 4E-36   |
|                       |                 |                     |                          |                     | >ref NP_909263.1  putative histone H2B [Oryza sativa (japonica cultivar-group)] dbj BAB44008.1  putative histone H2B [Oryza sativa (japonica cultivar-group)]                                                                                                                                                                                                                                                                  |       |         |
| CB280863              | 3.90E-04        | Mo17<B73=F1         | 1.51                     | 10                  | >pir JS0731  wound-inducible basic protein - kidney beandbj BAA02299.1  5.8 kb basic protein [Phaseolus vulgaris]  sp Q09020 PR4_PHAVU WOUND-INDUCED BASIC PROTEIN  gb AAA33774.1  basic protein                                                                                                                                                                                                                               | 47    | 2E-11   |
|                       |                 |                     |                          |                     | >ref NP_187379.1  unknown protein [Arabidopsis thaliana] gb AAF20223.1  putative wound-induced basic protein [Arabidopsis thaliana]  gb AAP21314.1  At3g07230 [Arabidopsis thaliana]  gb AAN72039.1  putative wound-induced basic protein [Arabidopsis thaliana]                                                                                                                                                               | 46    | 5E-9    |
| BM073252              | 3.92E-04        | Mo17<B73=F1         | 1.46                     | 10                  | >dbj BAD27890.1  putative vacuolar protein sorting: Vps29p [Oryza sativa (japonicacultivar-group)]                                                                                                                                                                                                                                                                                                                             | 188   | 2E-59   |
|                       |                 |                     |                          |                     | >ref NP_190365.3  hydrolase/ protein serine/threonine phosphatase [Arabidopsisthaliana]  ref NP_974400.1  hydrolase/ protein serine/threonine phosphatase [Arabidopsis thaliana]  emb CAB41864.1  putative protein [Arabidopsis thaliana]  gb AAO42341.1  unknown protein [Arabidopsis thaliana]  gb AAO22602.1  unknown protein [Arabidopsis thaliana]                                                                        | 190   | 3E-53   |
|                       |                 |                     |                          |                     | >ref NP_974399.1  protein serine/threonine phosphatase [Arabidopsis thaliana]                                                                                                                                                                                                                                                                                                                                                  | 180   | 3E-53   |
|                       |                 |                     |                          |                     | >ref XP_796390.1  PREDICTED: similar to Vacuolar protein sorting 29 (Vesicle proteinsorting 29) [Strongylocentrotus purpuratus]                                                                                                                                                                                                                                                                                                | 182   | 2E-38   |

**Table 4. Microarray analysis results, mode of gene action classification, and BLAST annotation for the 1,367 ESTs identified as differentially expressed among genotypes (15% FDR)**

| GenBank accession no. | Overall P value | Significant pattern | Fold change <sup>†</sup> | Sector <sup>‡</sup> | BLAST annotation*                                                                                                                                                                                                                                                                                                                                                                                                                                                                                                                                                                                                                                                                                                                                                                                                                                                                                                                                                                                                                                                                                                                                                                                | Score | E value |
|-----------------------|-----------------|---------------------|--------------------------|---------------------|--------------------------------------------------------------------------------------------------------------------------------------------------------------------------------------------------------------------------------------------------------------------------------------------------------------------------------------------------------------------------------------------------------------------------------------------------------------------------------------------------------------------------------------------------------------------------------------------------------------------------------------------------------------------------------------------------------------------------------------------------------------------------------------------------------------------------------------------------------------------------------------------------------------------------------------------------------------------------------------------------------------------------------------------------------------------------------------------------------------------------------------------------------------------------------------------------|-------|---------|
| BM073588              | 3.96E-04        | Mo17<B73=F1         | 1.51                     | 10                  | >emb CAE50610.1  novel protein similar to human and mouse vacuolar protein sorting29 (yeast) (VPS29) [Danio rerio] ref XP_707443.1  PREDICTED: similar to Vacuolar protein sorting 29 isoform 2 [Danio rerio] ref NP_956331.1  vacuolar protein sorting 29 [Danio rerio] gb AAH71331.1  Vacuolar protein sorting 29 [Danio rerio] gb AAH45981.1  Vacuolar protein sorting 29 [Danio rerio]                                                                                                                                                                                                                                                                                                                                                                                                                                                                                                                                                                                                                                                                                                                                                                                                       | 182   | 1E-36   |
|                       |                 |                     |                          |                     | >ref XP_469523.1  putative DNA-binding protein [Oryza sativa]gb AAK18838.1  putative DNA-binding protein [Oryza sativa]                                                                                                                                                                                                                                                                                                                                                                                                                                                                                                                                                                                                                                                                                                                                                                                                                                                                                                                                                                                                                                                                          | 161   | 2E-64   |
|                       |                 |                     |                          |                     | >gb AAZ20287.1  ubiquitin-conjugating enzyme 2 [Arachis hypogaea]                                                                                                                                                                                                                                                                                                                                                                                                                                                                                                                                                                                                                                                                                                                                                                                                                                                                                                                                                                                                                                                                                                                                | 159   | 3E-54   |
|                       |                 |                     |                          |                     | >gb ABA26987.1  TO38-23 [Taraxacum officinale]                                                                                                                                                                                                                                                                                                                                                                                                                                                                                                                                                                                                                                                                                                                                                                                                                                                                                                                                                                                                                                                                                                                                                   | 138   | 3E-49   |
|                       |                 |                     |                          |                     | >gb AAT01417.1  ubiquitin-conjugating enzyme family protein [Tamarix androssowii]                                                                                                                                                                                                                                                                                                                                                                                                                                                                                                                                                                                                                                                                                                                                                                                                                                                                                                                                                                                                                                                                                                                | 146   | 6E-49   |
|                       |                 |                     |                          |                     | >gb ABB29951.1  ubiquitin-conjugating enzyme family protein-like [Solanum tuberosum] gb ABA40444.1  ubiquitin-conjugating enzyme family protein-like protein [Solanum tuberosum]                                                                                                                                                                                                                                                                                                                                                                                                                                                                                                                                                                                                                                                                                                                                                                                                                                                                                                                                                                                                                 | 146   | 8E-49   |
| DV550635              | 3.99E-04        | B73<F1=Mo17         | 1.87                     | 3                   | ns                                                                                                                                                                                                                                                                                                                                                                                                                                                                                                                                                                                                                                                                                                                                                                                                                                                                                                                                                                                                                                                                                                                                                                                               |       |         |
| CB334575              | 4.03E-04        | Mo17<B73=F1         | 1.55                     | 11                  | >gb ABA94167.1  purple acid phosphatase precursor, putative [Oryza sativa (japonica cultivar-group)]                                                                                                                                                                                                                                                                                                                                                                                                                                                                                                                                                                                                                                                                                                                                                                                                                                                                                                                                                                                                                                                                                             | 294   | 4E-74   |
|                       |                 |                     |                          |                     | >ref NP_919594.1  putative purple acid phosphatase [Oryza sativa (japonica cultivar-group)] gb AAL34937.1  Putative purple acid phosphatase [Oryza sativa] gb AAP51881.1  Ser/Thr protein phosphatase, putative [Oryza sativa (japonica cultivar-group)]                                                                                                                                                                                                                                                                                                                                                                                                                                                                                                                                                                                                                                                                                                                                                                                                                                                                                                                                         | 335   | 8E-73   |
|                       |                 |                     |                          |                     | >gb AAT37529.1  purple acid phosphatase 1 [Solanum tuberosum]                                                                                                                                                                                                                                                                                                                                                                                                                                                                                                                                                                                                                                                                                                                                                                                                                                                                                                                                                                                                                                                                                                                                    | 328   | 5E-67   |
|                       |                 |                     |                          |                     | >ref NP_172923.3  hydrolase/ protein serine/threonine phosphatase [Arabidopsis thaliana] gb AAT95435.1  putative purple acid phosphatase [Arabidopsis thaliana] gb AAN41277.1  putative purple acid phosphatase [Arabidopsis thaliana]                                                                                                                                                                                                                                                                                                                                                                                                                                                                                                                                                                                                                                                                                                                                                                                                                                                                                                                                                           | 366   | 1E-66   |
|                       |                 |                     |                          |                     | >gb AAL49808.2  putative purple acid phosphatase [Arabidopsis thaliana]                                                                                                                                                                                                                                                                                                                                                                                                                                                                                                                                                                                                                                                                                                                                                                                                                                                                                                                                                                                                                                                                                                                          | 352   | 1E-66   |
|                       |                 |                     |                          |                     | >emb CAB80425.1  hypothetical protein [Arabidopsis thaliana]emb CAB38299.1  hypothetical protein [Arabidopsis thaliana]                                                                                                                                                                                                                                                                                                                                                                                                                                                                                                                                                                                                                                                                                                                                                                                                                                                                                                                                                                                                                                                                          | 87    | 1E-10   |
| CB815830              | 4.11E-04        | Mo17<F1<B73         | 1.41                     | 9                   | >ref XP_450543.1  unknown protein [Oryza sativa (japonica cultivar-group)]dbj BAD23593.1  unknown protein [Oryza sativa (japonica cultivar-group)]                                                                                                                                                                                                                                                                                                                                                                                                                                                                                                                                                                                                                                                                                                                                                                                                                                                                                                                                                                                                                                               | 177   | 4E-22   |
|                       |                 |                     |                          |                     | >ref NP_565877.1  unknown protein [Arabidopsis thaliana]dbj BAD94470.1  hypothetical protein [Arabidopsis thaliana] gb AAM61046.1  unknown [Arabidopsis thaliana]                                                                                                                                                                                                                                                                                                                                                                                                                                                                                                                                                                                                                                                                                                                                                                                                                                                                                                                                                                                                                                | 78    | 3E-11   |
|                       |                 |                     |                          |                     | >gb AAO42916.1  At3g54082 [Arabidopsis thaliana]dbj BAC43618.1  unknown protein [Arabidopsis thaliana] dbj BAC42414.1  unknown protein [Arabidopsis thaliana]                                                                                                                                                                                                                                                                                                                                                                                                                                                                                                                                                                                                                                                                                                                                                                                                                                                                                                                                                                                                                                    | 78    | 7E-11   |
|                       |                 |                     |                          |                     | >dbj BAD94948.1  hypothetical protein [Arabidopsis thaliana]                                                                                                                                                                                                                                                                                                                                                                                                                                                                                                                                                                                                                                                                                                                                                                                                                                                                                                                                                                                                                                                                                                                                     | 78    | 9E-11   |
|                       |                 |                     |                          |                     | >gb AAT08725.1  histone H4 [Hyacinthus orientalis]                                                                                                                                                                                                                                                                                                                                                                                                                                                                                                                                                                                                                                                                                                                                                                                                                                                                                                                                                                                                                                                                                                                                               | 103   | 1E-37   |
|                       |                 |                     |                          |                     | >dbj BAB71814.1  histone H4 [Citrus jambhiri]                                                                                                                                                                                                                                                                                                                                                                                                                                                                                                                                                                                                                                                                                                                                                                                                                                                                                                                                                                                                                                                                                                                                                    | 102   | 1E-37   |
| DV942210              | 4.20E-04        | Mo17<B73=F1         | 1.55                     | 10                  | >ref NP_563793.1  DNA binding [Arabidopsis thaliana]ref NP_850660.1  DNA binding [Arabidopsis thaliana] ref NP_180441.1  HIS4 [Arabidopsis thaliana] ref NP_568911.1  DNA binding [Arabidopsis thaliana] ref NP_568918.1  DNA binding [Arabidopsis thaliana] ref NP_190941.1  DNA binding [Arabidopsis thaliana] ref NP_563797.1  DNA binding [Arabidopsis thaliana] ref NP_850939.1  DNA binding [Arabidopsis thaliana] ref NP_190179.1  DNA binding [Arabidopsis thaliana] ref XP_475394.1  histone H4 [Oryza sativa (japonica cultivar-group)] ref XP_475383.1  putative histone H4 [Oryza sativa (japonica cultivar-group)] ref NP_912452.1  Unknown protein [Oryza sativa (japonica cultivar-group)] ref XP_467181.1  histone H4 [Oryza sativa (japonica cultivar-group)] ref NP_922551.1  histone H4 [Oryza sativa (japonica cultivar-group)] ref NP_915374.1  putative histone H4 [Oryza sativa (japonica cultivar-group)] ref NP_910647.1  histone H4 [Oryza sativa (japonica cultivar-group)] ref XP_473659.1  OSJNBa0088A01.17 [Oryza sativa (japonica cultivar-group)] gb AAU90170.1  histone H4 [Oryza sativa] >sp P62786 H4 WHEAT Histone H4 variant TH091gb AAA34292.1  histone H4 | 103   | 1E-37   |
|                       |                 |                     |                          |                     | >prf 1101277A  histone H4                                                                                                                                                                                                                                                                                                                                                                                                                                                                                                                                                                                                                                                                                                                                                                                                                                                                                                                                                                                                                                                                                                                                                                        | 102   | 1E-37   |
|                       |                 |                     |                          |                     | >gb AAK06838.1  glyoxalase I [Avicennia marina]                                                                                                                                                                                                                                                                                                                                                                                                                                                                                                                                                                                                                                                                                                                                                                                                                                                                                                                                                                                                                                                                                                                                                  | 184   | 7E-65   |
|                       |                 |                     |                          |                     | >emb CAA12028.1  Glyoxalase I [Cicer arietinum]sp O49818 LGUL_CICAR Lactoylglutathione lyase (Methylglyoxalase) (Aldoketomutase) (Glyoxalase I) (Glx I) (Ketone-aldehyde mutase) (S-D-lactoylglutathione methylglyoxal lyase)                                                                                                                                                                                                                                                                                                                                                                                                                                                                                                                                                                                                                                                                                                                                                                                                                                                                                                                                                                    | 186   | 1E-62   |
|                       |                 |                     |                          |                     | >ref NP_849609.1  calmodulin binding / lactoylglutathione lyase [Arabidopsis thaliana] ref NP_172291.1  calmodulin binding / lactoylglutathione lyase [Arabidopsis thaliana] ref NP_001030995.1  calmodulin binding / lactoylglutathione lyase [Arabidopsis thaliana] gb AAT41850.1  At1g08110 [Arabidopsis thaliana] gb AAN72031.1  glyoxalase I, putative [Arabidopsis thaliana] sp Q8HOV3 LGUL_ARATH Lactoylglutathione lyase (Methylglyoxalase) (Aldoketomutase) (Glyoxalase I) (Glx I) (Ketone-aldehyde mutase) (S-D-lactoylglutathione methylglyoxal lyase)                                                                                                                                                                                                                                                                                                                                                                                                                                                                                                                                                                                                                                | 185   | 9E-62   |
|                       |                 |                     |                          |                     | >ref NP_001030996.1  calmodulin binding / lactoylglutathione lyase [Arabidopsis thaliana]                                                                                                                                                                                                                                                                                                                                                                                                                                                                                                                                                                                                                                                                                                                                                                                                                                                                                                                                                                                                                                                                                                        | 235   | 9E-62   |
|                       |                 |                     |                          |                     | >emb CAA73691.1  Glyoxalase I [Brassica juncea]sp O04885 LGUL_BRAJU Lactoylglutathione lyase (Methylglyoxalase) (Aldoketomutase) (Glyoxalase I) (Glx I) (Ketone-aldehyde mutase) (S-D-lactoylglutathione methylglyoxal lyase)                                                                                                                                                                                                                                                                                                                                                                                                                                                                                                                                                                                                                                                                                                                                                                                                                                                                                                                                                                    | 185   | 3E-61   |
|                       |                 |                     |                          |                     | >gb AAF79839.1  T6D22.14 [Arabidopsis thaliana]                                                                                                                                                                                                                                                                                                                                                                                                                                                                                                                                                                                                                                                                                                                                                                                                                                                                                                                                                                                                                                                                                                                                                  | 2254  | 2E-18   |
|                       |                 |                     |                          |                     | >ref NP_849608.1  MOM (MAINTENANCE OF METHYLATION) [Arabidopsis thaliana]ref NP_563806.1  MOM (MAINTENANCE OF METHYLATION) [Arabidopsis thaliana] gb AAF73381.1  MOM [Arabidopsis thaliana]                                                                                                                                                                                                                                                                                                                                                                                                                                                                                                                                                                                                                                                                                                                                                                                                                                                                                                                                                                                                      | 2001  | 2E-18   |
|                       |                 |                     |                          |                     | >gb AAF73380.1  MOM [Arabidopsis thaliana]                                                                                                                                                                                                                                                                                                                                                                                                                                                                                                                                                                                                                                                                                                                                                                                                                                                                                                                                                                                                                                                                                                                                                       | 2001  | 2E-18   |
| CB816440              | 4.26E-04        | Mo17<B73=F1         | 1.61                     | 10                  | ns                                                                                                                                                                                                                                                                                                                                                                                                                                                                                                                                                                                                                                                                                                                                                                                                                                                                                                                                                                                                                                                                                                                                                                                               |       |         |
| DV491703              | 4.27E-04        | Mo17<F1<B73         | 2.48                     | 9                   | ns                                                                                                                                                                                                                                                                                                                                                                                                                                                                                                                                                                                                                                                                                                                                                                                                                                                                                                                                                                                                                                                                                                                                                                                               |       |         |
| CB381627              | 4.29E-04        | Mo17<B73=F1         | 1.41                     | 10                  | >dbj BAD54696.1  hypothetical protein [Oryza sativa (japonica cultivar-group)]dbj BAD34409.1  hypothetical protein [Oryza sativa (japonica cultivar-group)]                                                                                                                                                                                                                                                                                                                                                                                                                                                                                                                                                                                                                                                                                                                                                                                                                                                                                                                                                                                                                                      | 75    | 9E-28   |
|                       |                 |                     |                          |                     | >dbj BAC43353.1  unknown protein [Arabidopsis thaliana]                                                                                                                                                                                                                                                                                                                                                                                                                                                                                                                                                                                                                                                                                                                                                                                                                                                                                                                                                                                                                                                                                                                                          | 71    | 1E-26   |

**Table 4. Microarray analysis results, mode of gene action classification, and BLAST annotation for the 1,367 ESTs identified as differentially expressed among genotypes (15% FDR)**

| GenBank accession no. | Overall P value | Significant pattern | Fold change <sup>†</sup> | Sector <sup>‡</sup> | BLAST annotation*                                                                                                                                                                                                                                                                                                                                                                                                                                                                                                                                                               | Score | E value |
|-----------------------|-----------------|---------------------|--------------------------|---------------------|---------------------------------------------------------------------------------------------------------------------------------------------------------------------------------------------------------------------------------------------------------------------------------------------------------------------------------------------------------------------------------------------------------------------------------------------------------------------------------------------------------------------------------------------------------------------------------|-------|---------|
|                       |                 |                     |                          |                     | >gb EAA00792.2  ENSANGP00000020123 [Anopheles gambiae str. PEST]ref XP_320694.2  ENSANGP00000020123 [Anopheles gambiae str. PEST]                                                                                                                                                                                                                                                                                                                                                                                                                                               | 81    | 2E-10   |
|                       |                 |                     |                          |                     | >dbj BAE63661.1  unnamed protein product [Aspergillus oryzae]                                                                                                                                                                                                                                                                                                                                                                                                                                                                                                                   | 117   | 1E-9    |
|                       |                 |                     |                          |                     | >ref NP_652380.2  CG13018-PA [Drosophila melanogaster]gb AA55593.1  IP03340p [Drosophila melanogaster] gb AAF58293.2  CG13018-PA [Drosophila melanogaster]                                                                                                                                                                                                                                                                                                                                                                                                                      | 79    | 2E-8    |
| CB334308              | 4.31E-04        | Mo17<B73=F1         | 1.28                     | 10                  | >gb AAM08320.1  small Ran-related GTP-binding protein [Triticum aestivum]gb AAL30396.1  small Ras-related GTP-binding protein [Triticum aestivum]<br>>ref XP_475914.1  GTP-binding nuclear protein RAN-B1 [Oryza sativa (japonica cultivar-group)] gb AAT69585.1  GTP-binding nuclear protein RAN-B1 [Oryza sativa (japonica cultivar-group)] dbj BAA81911.1  Ran [Oryza sativa (japonica cultivar-group)] dbj BAB82438.1  small GTP-binding protein (Ran2) [Oryza sativa (japonica cultivar-group)]                                                                            | 221   | 3E-14   |
|                       |                 |                     |                          |                     | >gb AAD18006.1  Ran-related GTP binding protein [Zea mays]                                                                                                                                                                                                                                                                                                                                                                                                                                                                                                                      | 221   | 3E-14   |
|                       |                 |                     |                          |                     | >emb CAC10213.1  GTP-binding protein [Cicer arietinum]                                                                                                                                                                                                                                                                                                                                                                                                                                                                                                                          | 221   | 2E-12   |
|                       |                 |                     |                          |                     | >gb AAM12880.1  GTP-binding protein [Helianthus annuus]                                                                                                                                                                                                                                                                                                                                                                                                                                                                                                                         | 221   | 2E-12   |
| BM080173              | 4.37E-04        | Mo17<B73=F1         | 3.91                     | 10                  | >emb CAF31501.1  putative acid phosphatase [Hordeum vulgare subsp. vulgare]emb CAB71336.2  putative acid phosphatase [Hordeum vulgare subsp. vulgare]<br>>emb CAA11075.1  acid phosphatase [Glycine max]<br>>gb AAU90121.1  putative acid phosphatase [Oryza sativa (japonica cultivar-group)]gb AAW56902.1  putative acid phosphatase [Oryza sativa (japonica cultivar-group)]<br>>gb AAW56914.1  putative acid phosphatase [Oryza sativa (japonica cultivar-group)]gb AAW56899.1  putative acid phosphatase [Oryza sativa (japonica cultivar-group)]                          | 272   | 5E-49   |
|                       |                 |                     |                          |                     | >emb CAA11075.1  acid phosphatase [Glycine max]                                                                                                                                                                                                                                                                                                                                                                                                                                                                                                                                 | 264   | 1E-46   |
|                       |                 |                     |                          |                     | >gb AAU90121.1  putative acid phosphatase [Oryza sativa (japonica cultivar-group)]gb AAW56902.1  putative acid phosphatase [Oryza sativa (japonica cultivar-group)]                                                                                                                                                                                                                                                                                                                                                                                                             | 265   | 3E-44   |
|                       |                 |                     |                          |                     | >gb AAW56914.1  putative acid phosphatase [Oryza sativa (japonica cultivar-group)]gb AAW56899.1  putative acid phosphatase [Oryza sativa (japonica cultivar-group)]                                                                                                                                                                                                                                                                                                                                                                                                             | 243   | 2E-43   |
|                       |                 |                     |                          |                     | >gb AAV31208.1  unknow protein [Oryza sativa (japonica cultivar-group)]gb AAW56911.1  putative acid phosphatase [Oryza sativa (japonica cultivar-group)]                                                                                                                                                                                                                                                                                                                                                                                                                        | 250   | 2E-42   |
| DV490613              | 4.39E-04        | Mo17<B73=F1         | 4.01                     | 10                  | >ref XP_463025.1  unknown protein [Oryza sativa (japonica cultivar-group)]gb AAR10853.1  unknown protein [Oryza sativa (japonica cultivar-group)]<br>>ref XP_480216.1  unknown protein [Oryza sativa (japonica cultivar-group)]ref XP_507142.1  PREDICTED OJ9990_A01.113 gene product [Oryza sativa (japonica cultivar-group)] dbj BAC99902.1  unknown protein [Oryza sativa (japonica cultivar-group)]                                                                                                                                                                         | 490   | 8E-20   |
|                       |                 |                     |                          |                     | >gb AAL73043.1  histone H1-like protein [Zea mays]                                                                                                                                                                                                                                                                                                                                                                                                                                                                                                                              | 244   | 4E-26   |
|                       |                 |                     |                          |                     | >emb CAA40362.1  H1 histone [Zea mays]sp P23444 H1 MAIZE Histone H1                                                                                                                                                                                                                                                                                                                                                                                                                                                                                                             | 246   | 3E-16   |
|                       |                 |                     |                          |                     | >ref NP_909937.1  histone-like protein [Oryza sativa (japonica cultivar-group)]gb AAO37519.1  histone-like protein [Oryza sativa (japonica cultivar-group)]                                                                                                                                                                                                                                                                                                                                                                                                                     | 293   | 3E-16   |
|                       |                 |                     |                          |                     | >dbj BAA87331.1  variant of histone H1 [Lilium longiflorum]                                                                                                                                                                                                                                                                                                                                                                                                                                                                                                                     | 231   | 3E-16   |
|                       |                 |                     |                          |                     | >dbj BAA25203.1  histone H1 [Triticum aestivum]                                                                                                                                                                                                                                                                                                                                                                                                                                                                                                                                 | 284   | 8E-16   |
| DV489877              | 4.40E-04        | Mo17<F1<B73         | 1.89                     | 10                  | >dbj BAD28383.1  putative tripeptidyl peptidase II [Oryza sativa (japonica cultivar-group)]<br>>emb CAB79085.1  putative protein [Arabidopsis thaliana]emb CAB45880.1  putative protein [Arabidopsis thaliana]<br>>gb AAM20148.1  unknown protein [Arabidopsis thaliana]<br>>ref NP_193817.2  TPP2 (TRIPEPTIDYL PEPTIDASE II); subtilase [Arabidopsis thaliana]<br>>gb AAL27553.1  hypothetical protein [Musa acuminata]                                                                                                                                                        | 1359  | 2E-35   |
|                       |                 |                     |                          |                     | >emb CAB79085.1  putative protein [Arabidopsis thaliana]emb CAB45880.1  putative protein [Arabidopsis thaliana]                                                                                                                                                                                                                                                                                                                                                                                                                                                                 | 1396  | 2E-30   |
|                       |                 |                     |                          |                     | >gb AAM20148.1  unknown protein [Arabidopsis thaliana]                                                                                                                                                                                                                                                                                                                                                                                                                                                                                                                          | 1346  | 2E-30   |
|                       |                 |                     |                          |                     | >ref NP_193817.2  TPP2 (TRIPEPTIDYL PEPTIDASE II); subtilase [Arabidopsis thaliana]                                                                                                                                                                                                                                                                                                                                                                                                                                                                                             | 1380  | 2E-30   |
|                       |                 |                     |                          |                     | >gb AAL27553.1  hypothetical protein [Musa acuminata]                                                                                                                                                                                                                                                                                                                                                                                                                                                                                                                           | 234   | 2E-25   |
| AI665898              | 4.44E-04        | B73<F1=Mo17         | 1.84                     | 3                   | >dbj BAD45275.1  putative 24 kDa seed maturation protein [Oryza sativa (japonica cultivar-group)]<br>>gb ABB51093.1  reticulon [Hordeum vulgare]<br>>dbj BAD27895.1  putative 24 kDa seed maturation protein [Oryza sativa (japonica cultivar-group)]<br>>ref NP_913448.1  P0492F05.25 [Oryza sativa (japonica cultivar-group)]dbj BAB32723.1  unknown protein [Oryza sativa (japonica cultivar-group)]<br>dbj BAB92114.1  unknown protein [Oryza sativa (japonica cultivar-group)]<br>>gb ABC01908.1  putative 24 kDa seed maturation protein-like protein [Solanum tuberosum] | 265   | 6E-45   |
|                       |                 |                     |                          |                     | >gb ABB51093.1  reticulon [Hordeum vulgare]                                                                                                                                                                                                                                                                                                                                                                                                                                                                                                                                     | 204   | 8E-45   |
|                       |                 |                     |                          |                     | >dbj BAD27895.1  putative 24 kDa seed maturation protein [Oryza sativa (japonica cultivar-group)]                                                                                                                                                                                                                                                                                                                                                                                                                                                                               | 230   | 3E-41   |
|                       |                 |                     |                          |                     | >ref NP_913448.1  P0492F05.25 [Oryza sativa (japonica cultivar-group)]dbj BAB32723.1  unknown protein [Oryza sativa (japonica cultivar-group)]                                                                                                                                                                                                                                                                                                                                                                                                                                  | 279   | 1E-28   |
|                       |                 |                     |                          |                     | dbj BAB92114.1  unknown protein [Oryza sativa (japonica cultivar-group)]                                                                                                                                                                                                                                                                                                                                                                                                                                                                                                        | 255   | 7E-28   |
|                       |                 |                     |                          |                     | >gb ABC01908.1  putative 24 kDa seed maturation protein-like protein [Solanum tuberosum]                                                                                                                                                                                                                                                                                                                                                                                                                                                                                        | 255   | 7E-28   |
| CB251978              | 4.46E-04        | B73<F1=Mo17         | 1.37                     | 3                   | ns                                                                                                                                                                                                                                                                                                                                                                                                                                                                                                                                                                              |       |         |
| DV489688              | 4.70E-04        | B73<F1=Mo17         | 1.9                      | 3                   | ns                                                                                                                                                                                                                                                                                                                                                                                                                                                                                                                                                                              |       |         |
| BG841274              | 4.74E-04        | Mo17<F1<B73         | 1.67                     | 10                  | >gb AAC28490.1  photosystem II type II chlorophyll a/b binding protein [Sorghum bicolor]<br>>emb CAA48641.1  type II light-harvesting chlorophyll a/b-binding protein [Zeamays]<br>>gb AAT81763.1  chlorophyll a/b binding protein [Oryza sativa (japonica cultivar-group)]<br>>gb AAC15992.1  chlorophyll a/b binding protein [Oryza sativa]<br>>dbj BAA00537.1  type II light-harvesting chlorophyll a/b-binding protein [Oryza sativa (japonica cultivar-group)]                                                                                                             | 191   | 2E-37   |
|                       |                 |                     |                          |                     | >emb CAA48641.1  type II light-harvesting chlorophyll a/b-binding protein [Zeamays]                                                                                                                                                                                                                                                                                                                                                                                                                                                                                             | 229   | 5E-37   |
|                       |                 |                     |                          |                     | >gb AAT81763.1  chlorophyll a/b binding protein [Oryza sativa (japonica cultivar-group)]                                                                                                                                                                                                                                                                                                                                                                                                                                                                                        | 263   | 4E-36   |
|                       |                 |                     |                          |                     | >gb AAC15992.1  chlorophyll a/b binding protein [Oryza sativa]                                                                                                                                                                                                                                                                                                                                                                                                                                                                                                                  | 263   | 2E-35   |
|                       |                 |                     |                          |                     | >dbj BAA00537.1  type II light-harvesting chlorophyll a/b-binding protein [Oryza sativa (japonica cultivar-group)]                                                                                                                                                                                                                                                                                                                                                                                                                                                              | 263   | 3E-35   |
| CD001060              | 4.81E-04        | Mo17<F1<B73         | 1.54                     | 10                  | >gb AAG46061.1  hypothetical protein [Oryza sativa (japonica cultivar-group)]ref XP_469258.1  hypothetical protein [Oryza sativa (japonica cultivar-group)]<br>>gb ABA99954.1  hypothetical protein LOC_Os12g43780 [Oryza sativa (japonica cultivar-group)]<br>>ref XP_479102.1  unknown protein [Oryza sativa (japonica cultivar-group)]ref XP_506454.1  PREDICTED OSJNBa0072106.5 gene product [Oryza sativa (japonica cultivar-group)] dbj BAC84850.1  unknown protein [Oryza sativa (japonica cultivar-group)]                                                              | 322   | 2E-23   |
|                       |                 |                     |                          |                     | >gb ABA99954.1  hypothetical protein LOC_Os12g43780 [Oryza sativa (japonica cultivar-group)]                                                                                                                                                                                                                                                                                                                                                                                                                                                                                    | 150   | 3E-14   |
|                       |                 |                     |                          |                     | >ref XP_479102.1  unknown protein [Oryza sativa (japonica cultivar-group)]ref XP_506454.1  PREDICTED OSJNBa0072106.5 gene product [Oryza sativa (japonica cultivar-group)] dbj BAC84850.1  unknown protein [Oryza sativa (japonica cultivar-group)]                                                                                                                                                                                                                                                                                                                             | 245   | 1E-9    |
| BM266692              | 4.91E-04        | Mo17<F1<B73         | 9                        | 10                  |                                                                                                                                                                                                                                                                                                                                                                                                                                                                                                                                                                                 |       |         |
| CD059030              | 4.93E-04        | Mo17<B73=F1         | 1.41                     | 11                  | >sp P23346 SODC5 MAIZE Superoxide dismutase [Cu-Zn] 4AP<br>>emb CAB57992.1  superoxide dismutase-4AP [Zea mays]sp P23345 SODC4 MAIZE Superoxide dismutase [Cu-Zn] 4A<br>>emb CAB57993.1  superoxide dismutase-4A [Zea mays]gb AAB49913.1  superoxide dismutase 4A                                                                                                                                                                                                                                                                                                               | 152   | 2E-77   |
|                       |                 |                     |                          |                     | >emb CAB57992.1  superoxide dismutase-4AP [Zea mays]sp P23345 SODC4 MAIZE Superoxide dismutase [Cu-Zn] 4A                                                                                                                                                                                                                                                                                                                                                                                                                                                                       | 152   | 1E-76   |
|                       |                 |                     |                          |                     | >emb CAB57993.1  superoxide dismutase-4A [Zea mays]gb AAB49913.1  superoxide dismutase 4A                                                                                                                                                                                                                                                                                                                                                                                                                                                                                       | 152   | 2E-75   |

**Table 4. Microarray analysis results, mode of gene action classification, and BLAST annotation for the 1,367 ESTs identified as differentially expressed among genotypes (15% FDR)**

| GenBank accession no. | Overall P value | Significant pattern | Fold change <sup>†</sup> | Sector <sup>‡</sup> | BLAST annotation*                                                                                                                                                                                                                                                                                                                                                                                                                                                                                                                                                | Score | E value |
|-----------------------|-----------------|---------------------|--------------------------|---------------------|------------------------------------------------------------------------------------------------------------------------------------------------------------------------------------------------------------------------------------------------------------------------------------------------------------------------------------------------------------------------------------------------------------------------------------------------------------------------------------------------------------------------------------------------------------------|-------|---------|
|                       |                 |                     |                          |                     | >sp P28757 SODC2_ORYSA Superoxide dismutase [Cu-Zn] 2gb AAC14465.1  cytosolic copper/zinc-superoxide dismutase [Oryza sativa] dbj BAA00800.1  copper/zinc-superoxide dismutase [Oryza sativa (japonica cultivar-group)]                                                                                                                                                                                                                                                                                                                                          | 152   | 3E-71   |
|                       |                 |                     |                          |                     | >gb AA556345.1  cytoplasmic copper/zinc-superoxide dismutase [Oryza sativa (indicacultivar-group)] sp P28756 SODC1_ORYSA Superoxide dismutase [Cu-Zn] 1 gb AAC14464.1  cytosolic copper/zinc-superoxide dismutase [Oryza sativa] dbj BAA00799.1  copper/zinc-superoxide dismutase [Oryza sativa (japonica cultivar-group)] prf 2111424A Cu/Zn superoxide dismutase                                                                                                                                                                                               | 152   | 3E-70   |
| CB410998              | 5.09E-04        | Mo17<B73=F1         | 1.52                     | 10                  | >ref XP_482710.1  unknown protein [Oryza sativa (japonica cultivar-group)]ref XP_507588.1  PREDICTED OJ1117_F10.6 gene product [Oryza sativa (japonica cultivar-group)] ref XP_507250.1  PREDICTED OJ1117_F10.6 gene product [Oryza sativa (japonica cultivar-group)] dbj BAD08781.1  unknown protein [Oryza sativa (japonica cultivar-group)]                                                                                                                                                                                                                   | 464   | 2E-79   |
|                       |                 |                     |                          |                     | >ref XP_482707.1  fiber protein-like [Oryza sativa (japonica cultivar-group)]dbj BAD08741.1  fiber protein-like [Oryza sativa (japonica cultivar-group)]                                                                                                                                                                                                                                                                                                                                                                                                         | 683   | 3E-70   |
|                       |                 |                     |                          |                     | >ref NP_189910.2  DNA binding / protein binding / zinc ion binding [Arabidopsisthaliana] gb AAQ82841.1  At3g43240 [Arabidopsis thaliana]                                                                                                                                                                                                                                                                                                                                                                                                                         | 747   | 1E-54   |
|                       |                 |                     |                          |                     | >emb CAB89045.1  putative protein [Arabidopsis thaliana]                                                                                                                                                                                                                                                                                                                                                                                                                                                                                                         | 717   | 1E-53   |
|                       |                 |                     |                          |                     | >ref XP_482708.1  hypothetical protein [Oryza sativa (japonica cultivar-group)]dbj BAD08779.1  hypothetical protein [Oryza sativa (japonica cultivar-group)]                                                                                                                                                                                                                                                                                                                                                                                                     | 301   | 2E-30   |
| CB815754              | 5.09E-04        | B73<F1<Mo17         | 1.43                     | 4                   | >ref XP_476775.1  putative DNA-directed RNA polymerase II 13.6K chain [Oryza sativa(japonica cultivar-group)] dbj BAC83620.1  putative DNA-directed RNA polymerase II 13.6K chain [Oryza sativa (japonica cultivar-group)]                                                                                                                                                                                                                                                                                                                                       | 120   | 6E-58   |
|                       |                 |                     |                          |                     | >ref NP_190777.1  ATRPB13.6; DNA binding / DNA-directed RNA polymerase [Arabidopsisthaliana] emb CAB41329.1  DNA-directed RNA polymerase II 13.6K chain [Arabidopsis thaliana] gb AAO64919.1  At3g52090 [Arabidopsis thaliana] gb AAB02849.1  RNA polymerase II 13.6 kDa subunit sp Q38859 RPB11_ARATH DNA-directed RNA polymerase II 13.6 kDa polypeptide pir S71204 DNA-directed RNA polymerase (EC 2.7.7.6) II 13.6K chain - Arabidopsis thaliana                                                                                                             | 116   | 1E-49   |
|                       |                 |                     |                          |                     | >emb CAF90169.1  unnamed protein product [Tetraodon nigroviridis]                                                                                                                                                                                                                                                                                                                                                                                                                                                                                                | 117   | 1E-28   |
|                       |                 |                     |                          |                     | >gb EAL33630.1  GA19897-PA [Drosophila pseudoobscura]                                                                                                                                                                                                                                                                                                                                                                                                                                                                                                            | 117   | 1E-28   |
|                       |                 |                     |                          |                     | >ref NP_609836.1  CG6840-PA [Drosophila melanogaster]gb AAF53606.1  CG6840-PA [Drosophila melanogaster] sp Q9VJE4 RPB11_DROME DNA-directed RNA polymerase II 13.3 kDa polypeptide (RPB11)                                                                                                                                                                                                                                                                                                                                                                        | 117   | 2E-28   |
| BG874095              | 5.11E-04        | Mo17<B73=F1         | 1.85                     | 10                  | >tpg DAA00299.1  TPA: putative phytylsulfokine peptide precursor [Zea mays]                                                                                                                                                                                                                                                                                                                                                                                                                                                                                      | 102   | 6E-38   |
|                       |                 |                     |                          |                     | >ref XP_470620.1  Putative Phytosulfokines precursor [Oryza sativa (japonicacultivar-group)] gb AAM19137.1  Putative Phytosulfokines precursor [Oryza sativa (japonica cultivar-group)] gb AAO00693.1  Putative Phytosulfokines precursor [Oryza sativa (japonica cultivar-group)]                                                                                                                                                                                                                                                                               | 101   | 5E-14   |
| CD651787              | 5.14E-04        | Mo17<B73=F1         | 1.47                     | 10                  | >ref XP_479153.1  elongation factor 1 beta [Oryza sativa (japonica cultivar-group)]ref XP_506463.1  PREDICTED P0616D06.117 gene product [Oryza sativa (japonica cultivar-group)] dbj BAC16499.1  elongation factor 1 beta [Oryza sativa (japonica cultivar-group)] dbj BAA04903.1  elongation factor 1 beta [Oryza sativa (japonica cultivar-group)] sp Q40680 EF1D ORYSA Elongation factor 1-delta (EF-1-delta) (Elongation factor 1B-beta) (eEF-1B beta)                                                                                                       | 229   | 2E-40   |
|                       |                 |                     |                          |                     | >gb AAU89237.1  elongation factor 1 beta 2 [Oryza sativa (japonica cultivar-group)]dbj BAA34599.1  elongation factor 1 beta 2 [Oryza sativa (japonica cultivar-group)] dbj BAA34598.1  elongation factor 1 beta 2 [Oryza sativa (japonica cultivar-group)]                                                                                                                                                                                                                                                                                                       | 226   | 8E-34   |
|                       |                 |                     |                          |                     | >gb AAR15081.1  translational elongation factor 1 subunit Bbeta [Pisum sativum]                                                                                                                                                                                                                                                                                                                                                                                                                                                                                  | 231   | 7E-33   |
|                       |                 |                     |                          |                     | >emb CAB90214.1  putative elongation factor 1 beta [Hordeum vulgare subsp. vulgare]                                                                                                                                                                                                                                                                                                                                                                                                                                                                              | 226   | 4E-32   |
|                       |                 |                     |                          |                     | >sp P93447 EF1D_PIMBR Elongation factor 1-delta (EF-1-delta) (Elongation factor 1B-beta)(eEF-1B beta) gb AAB68395.1  elongation factor 1-beta [Pimpinella brachycarpa]                                                                                                                                                                                                                                                                                                                                                                                           | 226   | 5E-32   |
| DV491446              | 5.16E-04        | B73<F1<Mo17         | 6.34                     | 3                   | ns                                                                                                                                                                                                                                                                                                                                                                                                                                                                                                                                                               |       |         |
| BG841152              | 5.18E-04        | F1=Mo17<B73         | 1.8                      | 9                   | >gb AAG34839.1  glutathione S-transferase GST 31 [Zea mays]                                                                                                                                                                                                                                                                                                                                                                                                                                                                                                      | 232   | 7E-45   |
|                       |                 |                     |                          |                     | >gb AAG34842.1  glutathione S-transferase GST 34 [Zea mays]                                                                                                                                                                                                                                                                                                                                                                                                                                                                                                      | 225   | 4E-39   |
|                       |                 |                     |                          |                     | >ref NP_922426.1  putative glutathione S-transferase [Oryza sativa (japonicacultivar-group)] gb AAM12496.1  putative glutathione S-transferase [Oryza sativa (japonica cultivar-group)] gb AAP54713.1  glutathione S-transferase, putative [Oryza sativa (japonica cultivar-group)]                                                                                                                                                                                                                                                                              | 255   | 3E-30   |
|                       |                 |                     |                          |                     | >ref NP_922425.1  putative glutathione S-transferase [Oryza sativa (japonicacultivar-group)] gb AAK98543.1  putative glutathione S-transferase OsGSTU15 [Oryza sativa (japonica cultivar-group)] gb AAM12500.1  putative glutathione S-transferase [Oryza sativa (japonica cultivar-group)] gb AAP54712.1  glutathione S-transferase, putative [Oryza sativa (japonica cultivar-group)]                                                                                                                                                                          | 244   | 2E-28   |
|                       |                 |                     |                          |                     | >gb ABB47914.1  glutathione S-transferase, putative [Oryza sativa (japonicacultivar-group)]                                                                                                                                                                                                                                                                                                                                                                                                                                                                      | 130   | 2E-28   |
| CB331056              | 5.26E-04        | Mo17<B73=F1         | 1.4                      | 10                  | >gb AAK06838.1  glyoxalase I [Avicennia marina]                                                                                                                                                                                                                                                                                                                                                                                                                                                                                                                  | 184   | 2E-19   |
|                       |                 |                     |                          |                     | >emb CAA12028.1  Glyoxalase I [Cicer arietinum]sp O49818 LGUL_CICAR Lactoylglutathione lyase (Methylglyoxalase) (Aldoketomutase) (Glyoxalase I) (Glx I) (Ketone-aldehyde mutase) (S-D-lactoylglutathione methylglyoxal lyase)                                                                                                                                                                                                                                                                                                                                    | 186   | 6E-19   |
|                       |                 |                     |                          |                     | >ref NP_849609.1  calmodulin binding / lactoylglutathione lyase [Arabidopsisthaliana] ref NP_172291.1  calmodulin binding / lactoylglutathione lyase [Arabidopsis thaliana] ref NP_001030995.1  calmodulin binding / lactoylglutathione lyase [Arabidopsis thaliana] gb AAT41850.1  At1g08110 [Arabidopsis thaliana] gb AAN72031.1  glyoxalase I, putative [Arabidopsis thaliana] sp Q8H0V3 LGUL_ARATH Lactoylglutathione lyase (Methylglyoxalase) (Aldoketomutase) (Glyoxalase I) (Glx I) (Ketone-aldehyde mutase) (S-D-lactoylglutathione methylglyoxal lyase) | 185   | 2E-18   |
|                       |                 |                     |                          |                     | >ref NP_001030996.1  calmodulin binding / lactoylglutathione lyase [Arabidopsisthaliana]                                                                                                                                                                                                                                                                                                                                                                                                                                                                         | 235   | 2E-18   |
|                       |                 |                     |                          |                     | >gb AAF79827.1  T6D22.20 [Arabidopsis thaliana]                                                                                                                                                                                                                                                                                                                                                                                                                                                                                                                  | 196   | 2E-18   |
| CD484616              | 5.33E-04        | F1=Mo17<B73         | 1.39                     | 9                   | ns                                                                                                                                                                                                                                                                                                                                                                                                                                                                                                                                                               |       |         |
| BM332662              | 5.34E-04        | Mo17<B73=F1         | 1.61                     | 10                  | ns                                                                                                                                                                                                                                                                                                                                                                                                                                                                                                                                                               |       |         |

**Table 4. Microarray analysis results, mode of gene action classification, and BLAST annotation for the 1,367 ESTs identified as differentially expressed among genotypes (15% FDR)**

| GenBank accession no. | Overall P value | Significant pattern | Fold change <sup>†</sup> | Sector <sup>‡</sup> | BLAST annotation*                                                                                                                                                                                                                                                                                                                                                                                                                                                                                                | Score | E value |
|-----------------------|-----------------|---------------------|--------------------------|---------------------|------------------------------------------------------------------------------------------------------------------------------------------------------------------------------------------------------------------------------------------------------------------------------------------------------------------------------------------------------------------------------------------------------------------------------------------------------------------------------------------------------------------|-------|---------|
| BM335631              | 5.43E-04        | Mo17<B73=F1         | 7.89                     | 10                  | >emb CAA44165.1  unnamed protein product [Zea mays]                                                                                                                                                                                                                                                                                                                                                                                                                                                              | 611   | 1E-44   |
|                       |                 |                     |                          |                     | >gb AAA21566.1  Mudra [Zea mays] gb AAA81535.1  mudra gene product                                                                                                                                                                                                                                                                                                                                                                                                                                               | 823   | 1E-44   |
|                       |                 |                     |                          |                     | >gb AAB48408.1  MURAZC [Zea mays]                                                                                                                                                                                                                                                                                                                                                                                                                                                                                | 823   | 3E-44   |
|                       |                 |                     |                          |                     | >gb AAN40034.1  putative MURAZC [Zea mays]                                                                                                                                                                                                                                                                                                                                                                                                                                                                       | 566   | 7E-41   |
|                       |                 |                     |                          |                     | >ref XP_507157.1  PREDICTED P0035F08.13 gene product [Oryza sativa (japonica cultivar-group)]                                                                                                                                                                                                                                                                                                                                                                                                                    | 373   | 6E-37   |
| CD001481              | 5.43E-04        | Mo17<B73=F1         | 1.23                     | 10                  | >ref XP_475453.1  putative 60S ribosomal protein L24 [Oryza sativa (japonica cultivar-group)]  gb AAT01333.1  putative 60S ribosomal protein L24 [Oryza sativa (japonica cultivar-group)]                                                                                                                                                                                                                                                                                                                        | 161   | 1E-43   |
|                       |                 |                     |                          |                     | >dbj BAD82702.1  putative 60S ribosomal protein L24 [Oryza sativa (japonica cultivar-group)]                                                                                                                                                                                                                                                                                                                                                                                                                     | 162   | 6E-43   |
|                       |                 |                     |                          |                     | >ref NP_911528.1  putative 60S ribosomal protein L24 [Oryza sativa (japonica cultivar-group)]  dbj BAD30738.1  putative 60S ribosomal protein L24 [Oryza sativa (japonica cultivar-group)]  dbj BAC06922.1  putative 60S ribosomal protein L24 [Oryza sativa (japonica cultivar-group)]                                                                                                                                                                                                                          | 160   | 1E-42   |
|                       |                 |                     |                          |                     | >emb CAA63960.1  L24 ribosomal protein [Hordeum vulgare subsp. vulgare] sp P50888 RL24 HORVU 60S ribosomal protein L24                                                                                                                                                                                                                                                                                                                                                                                           | 162   | 9E-42   |
|                       |                 |                     |                          |                     | >gb AAG13986.1  60S ribosomal protein L24 [Prunus avium] sp Q9FUL4 RL24 PRUAV 60S ribosomal protein L24                                                                                                                                                                                                                                                                                                                                                                                                          | 186   | 5E-40   |
| DV622327              | 5.44E-04        | Mo17<F1<B73         | 1.36                     | 10                  | ns                                                                                                                                                                                                                                                                                                                                                                                                                                                                                                               |       |         |
| BM073390              | 5.56E-04        | B73<F1<Mo17         | 6.27                     | 3                   | ns                                                                                                                                                                                                                                                                                                                                                                                                                                                                                                               |       |         |
| DV490312              | 5.57E-04        | Mo17<B73=F1         | 1.68                     | 10                  | >gb AAO72563.1  elongation factor 1 gamma-like protein [Oryza sativa (japonica cultivar-group)]                                                                                                                                                                                                                                                                                                                                                                                                                  | 413   | 1E-53   |
|                       |                 |                     |                          |                     | >dbj BAD61932.1  putative elongation factor 1 gamma [Oryza sativa (japonica cultivar-group)]  dbj BAD61828.1  putative elongation factor 1 gamma [Oryza sativa (japonica cultivar-group)]                                                                                                                                                                                                                                                                                                                        | 416   | 1E-53   |
|                       |                 |                     |                          |                     | >ref XP_464690.1  Elongation factor 1-gamma [Oryza sativa (japonica cultivar-group)] dbj BAD17615.1  Elongation factor 1-gamma [Oryza sativa (japonica cultivar-group)]  sp Q9ZRI7 EF1G Oryza Elongation factor 1-gamma (EF-1-gamma) (eEF-1B gamma)  dbj BAA34206.1  elongation factor 1B gamma [Oryza sativa (japonica cultivar-group)]                                                                                                                                                                         | 418   | 8E-53   |
|                       |                 |                     |                          |                     | >gb AAO72574.1  elongation factor 1 gamma-like protein [Oryza sativa (japonica cultivar-group)]                                                                                                                                                                                                                                                                                                                                                                                                                  | 409   | 2E-52   |
|                       |                 |                     |                          |                     | >ref XP_464689.1  putative elongation factor 1-gamma [Oryza sativa (japonica cultivar-group)]  dbj BAD17614.1  putative elongation factor 1-gamma [Oryza sativa (japonica cultivar-group)]                                                                                                                                                                                                                                                                                                                       | 414   | 2E-52   |
| CB605387              | 5.61E-04        | B73<F1<Mo17         | 1.3                      | 3                   | >ref XP_507607.1  PREDICTED P0562A06.14 gene product [Oryza sativa (japonica cultivar-group)]  ref XP_507335.1  PREDICTED P0562A06.14 gene product [Oryza sativa (japonica cultivar-group)]  ref XP_483765.1  putative 40S ribosomal protein S25 (RPS25B) [Oryza sativa (japonica cultivar-group)]  dbj BAD13135.1  putative 40S ribosomal protein S25 (RPS25B) [Oryza sativa (japonica cultivar-group)]                                                                                                         | 108   | 2E-11   |
|                       |                 |                     |                          |                     | >dbj BAD46219.1  putative 40S ribosomal protein S25 [Oryza sativa (japonica cultivar-group)]                                                                                                                                                                                                                                                                                                                                                                                                                     | 108   | 6E-11   |
|                       |                 |                     |                          |                     | >ref NP_179752.1  structural constituent of ribosome [Arabidopsis thaliana] gb AAD23647.1  40S ribosomal protein S25 [Arabidopsis thaliana]  gb AAM10294.1  At2g21580/F2G1.15 [Arabidopsis thaliana]  gb AAK82474.1  At2g21580/F2G1.15 [Arabidopsis thaliana]  pir H84602 40S ribosomal protein S25 [imported] - Arabidopsis thaliana  sp Q9SIK2 RS25A ARATH 40S ribosomal protein S25-1                                                                                                                         | 108   | 6E-11   |
|                       |                 |                     |                          |                     | >ref NP_001031390.1  structural constituent of ribosome [Arabidopsis thaliana]                                                                                                                                                                                                                                                                                                                                                                                                                                   | 107   | 6E-11   |
|                       |                 |                     |                          |                     | >ref NP_195631.1  structural constituent of ribosome [Arabidopsis thaliana] emb CAB80583.1  ribosomal protein S25 [Arabidopsis thaliana]  emb CAB43635.1  ribosomal protein S25 [Arabidopsis thaliana]  gb AAL15350.1  AT4g39200/T22F8_100 [Arabidopsis thaliana]  gb AAK59777.1  AT4g39200/T22F8_100 [Arabidopsis thaliana]  gb AAM62797.1  ribosomal protein S25 [Arabidopsis thaliana]  sp Q9T029 RS25B_ARATH 40S ribosomal protein S25-2  pir T08568 ribosomal protein S25, cytosolic - Arabidopsis thaliana | 108   | 3E-10   |
| DV621333              | 5.62E-04        | Mo17<B73=F1         | 1.39                     | 10                  | >gb AAC19375.1  acireductone dioxygenase 2 [Oryza sativa]                                                                                                                                                                                                                                                                                                                                                                                                                                                        | 198   | 2E-92   |
|                       |                 |                     |                          |                     | >gb AAX55895.1  aci-reductone dioxygenase-like protein [Oryza sativa (japonica cultivar-group)]                                                                                                                                                                                                                                                                                                                                                                                                                  | 198   | 5E-92   |
|                       |                 |                     |                          |                     | >gb AAN06863.1  Putative probable submergence induced, nickel-binding protein 2A [Oryza sativa (japonica cultivar-group)]                                                                                                                                                                                                                                                                                                                                                                                        | 254   | 3E-90   |
|                       |                 |                     |                          |                     | >dbj BAB61039.1  iron-deficiency induced gene [Hordeum vulgare]                                                                                                                                                                                                                                                                                                                                                                                                                                                  | 198   | 1E-88   |
|                       |                 |                     |                          |                     | >gb AAC05511.1  acireductone dioxygenase 1 [Oryza sativa]                                                                                                                                                                                                                                                                                                                                                                                                                                                        | 199   | 3E-81   |
| BM341094              | 5.79E-04        | Mo17<B73=F1         | 1.56                     | 10                  | >ref XP_474686.1  OSJNBb0006L01.5 [Oryza sativa (japonica cultivar-group)] emb CAE04393.2  OSJNBb0006L01.5 [Oryza sativa (japonica cultivar-group)]                                                                                                                                                                                                                                                                                                                                                              | 253   | 2E-61   |
|                       |                 |                     |                          |                     | >gb AAM61464.1  electron transfer flavoprotein beta-subunit-like [Arabidopsis thaliana]                                                                                                                                                                                                                                                                                                                                                                                                                          | 251   | 3E-53   |
|                       |                 |                     |                          |                     | >ref NP_199156.1  electron transporter [Arabidopsis thaliana] gb AAL38600.1  AT5g43430/MWF20_14 [Arabidopsis thaliana]  gb AAK74015.1  AT5g43430/MWF20_14 [Arabidopsis thaliana]  dbj BAA97422.1  electron transfer flavoprotein beta-subunit-like [Arabidopsis thaliana]                                                                                                                                                                                                                                        | 251   | 3E-53   |
|                       |                 |                     |                          |                     | >ref ZP_00509545.1  Electron transfer flavoprotein beta-subunit [Polaromonas sp. JS666]                                                                                                                                                                                                                                                                                                                                                                                                                          | 249   | 5E-43   |
|                       |                 |                     |                          |                     | >gb AAH59787.1  MGC68596 protein [Xenopus laevis]                                                                                                                                                                                                                                                                                                                                                                                                                                                                | 254   | 1E-41   |
| CB603863              | 5.82E-04        | Mo17<F1<B73         | 1.54                     | 10                  | >ref NP_908597.1  putative endo-1,3(4)-beta-glucanase [Oryza sativa (japonica cultivar-group)]  dbj BAB92772.1  putative endo-1,3(4)-beta-glucanase [Oryza sativa (japonica cultivar-group)]                                                                                                                                                                                                                                                                                                                     | 499   | 2E-41   |
|                       |                 |                     |                          |                     | >ref NP_192138.1  hydrolase, hydrolyzing O-glycosyl compounds [Arabidopsis thaliana] emb CAB80722.1  putative endo-1, 4-beta glucanase [Arabidopsis thaliana]                                                                                                                                                                                                                                                                                                                                                    |       |         |
|                       |                 |                     |                          |                     | gb AAM26639.1  AT4g02290/T2H3_5 [Arabidopsis thaliana]  gb AAL85001.1  AT4g02290/T2H3_5 [Arabidopsis thaliana]  gb AAC28173.1  T2H3.5 [Arabidopsis thaliana]                                                                                                                                                                                                                                                                                                                                                     | 516   | 1E-31   |
|                       |                 |                     |                          |                     | >gb AAA80495.1  endo-1,4-beta-glucanase precursor                                                                                                                                                                                                                                                                                                                                                                                                                                                                | 510   | 2E-31   |
|                       |                 |                     |                          |                     | >gb ABC70313.1  endo-1,4-beta-glucanase precursor [Glycine max]                                                                                                                                                                                                                                                                                                                                                                                                                                                  | 414   | 3E-31   |



**Table 4. Microarray analysis results, mode of gene action classification, and BLAST annotation for the 1,367 ESTs identified as differentially expressed among genotypes (15% FDR)**

| GenBank accession no. | Overall P value | Significant pattern | Fold change <sup>†</sup> | Sector <sup>‡</sup> | BLAST annotation*                                                                                                                                                                                                                                                                                                                                                                                                                                             | Score | E value |
|-----------------------|-----------------|---------------------|--------------------------|---------------------|---------------------------------------------------------------------------------------------------------------------------------------------------------------------------------------------------------------------------------------------------------------------------------------------------------------------------------------------------------------------------------------------------------------------------------------------------------------|-------|---------|
|                       |                 |                     |                          |                     | >gb AAC12684.1  endo-beta-1,4-glucanase [Pinus radiata]                                                                                                                                                                                                                                                                                                                                                                                                       | 510   | 5E-31   |
| DV493407              | 5.83E-04        | B73<F1<Mo17         | 1.97                     | 5                   | >gb AAR91199.1  cytochrome c oxidase subunit 2 [Zea mays]sp P00412 COX2 MAIZE Cytochrome c oxidase subunit 2 (Cytochrome c oxidase polypeptide II)                                                                                                                                                                                                                                                                                                            | 260   | 3E-26   |
|                       |                 |                     |                          |                     | >sp P00413 COX2 WHEAT Cytochrome c oxidase subunit 2 (Cytochrome c oxidase polypeptideII)                                                                                                                                                                                                                                                                                                                                                                     | 260   | 3E-26   |
|                       |                 |                     |                          |                     | >emb CAA37048.1  cytochrome-c oxidase [Triticum aestivum]                                                                                                                                                                                                                                                                                                                                                                                                     | 260   | 1E-25   |
|                       |                 |                     |                          |                     | >emb CAA24094.1  cytochrome oxidase subunit II [Zea mays]                                                                                                                                                                                                                                                                                                                                                                                                     | 260   | 3E-24   |
|                       |                 |                     |                          |                     | >emb CAA24093.1  cytochrome oxidase subunit II [Zea mays]                                                                                                                                                                                                                                                                                                                                                                                                     | 274   | 3E-24   |
| CB833618              | 5.88E-04        | B73<F1=Mo17         | 1.51                     | 3                   | >emb CAA55022.1  beta tubulin [Oryza sativa (japonica cultivar-group)]                                                                                                                                                                                                                                                                                                                                                                                        | 447   | 6E-67   |
|                       |                 |                     |                          |                     | >emb CAE52516.1  beta tubulin [Setaria viridis]                                                                                                                                                                                                                                                                                                                                                                                                               | 448   | 6E-67   |
|                       |                 |                     |                          |                     | >ref NP_915874.1  tubulin beta chain [Oryza sativa (japonica cultivar-group)]dbj BAB92274.1  beta-tubulin [Oryza sativa (japonica cultivar-group)]                                                                                                                                                                                                                                                                                                            |       |         |
|                       |                 |                     |                          |                     | dbj BAA06381.1  beta-tubulin [Oryza sativa (japonica cultivar-group)] sp P45960 TBB4 ORYZA Tubulin beta-4 chain (Beta-4 tubulin)                                                                                                                                                                                                                                                                                                                              | 447   | 6E-67   |
|                       |                 |                     |                          |                     | >gb AAA66495.1  beta-tubulin                                                                                                                                                                                                                                                                                                                                                                                                                                  | 447   | 6E-67   |
|                       |                 |                     |                          |                     | >sp Q41783 TBB6 MAIZE Tubulin beta-6 chain (Beta-6 tubulin)gb AAA20186.1  beta-6 tubulin                                                                                                                                                                                                                                                                                                                                                                      | 446   | 6E-67   |
| DV621288              | 5.90E-04        | B73<F1=Mo17         | 1.38                     | 3                   | >gb AAV88604.1  voltage dependent anion channel protein [Pennisetum glaucum]gb AAV88603.1  voltage dependent anion channel protein [Pennisetum glaucum]                                                                                                                                                                                                                                                                                                       | 277   | 9E-83   |
|                       |                 |                     |                          |                     | gb AAP46186.1  PgPOR29 [Pennisetum glaucum]                                                                                                                                                                                                                                                                                                                                                                                                                   | 277   | 5E-79   |
|                       |                 |                     |                          |                     | >gb AAO72587.1  porin-like protein [Oryza sativa (japonica cultivar-group)]                                                                                                                                                                                                                                                                                                                                                                                   | 276   | 4E-57   |
|                       |                 |                     |                          |                     | >emb CAA63968.1  pom30 [Solanum tuberosum]                                                                                                                                                                                                                                                                                                                                                                                                                    | 275   | 4E-57   |
|                       |                 |                     |                          |                     | >gb ABB16970.1  POM30-like protein [Solanum tuberosum]                                                                                                                                                                                                                                                                                                                                                                                                        | 276   | 4E-54   |
|                       |                 |                     |                          |                     | >gb AAQ87022.1  VDACC2.1 [Lotus corniculatus var. japonicus]                                                                                                                                                                                                                                                                                                                                                                                                  | 276   | 4E-54   |
| DV490747              | 6.11E-04        | F1=Mo17<B73         | 1.35                     | 8                   | >dbj BAD27593.1  putative aspartate transaminase [Oryza sativa (japonica cultivar-group)]                                                                                                                                                                                                                                                                                                                                                                     | 432   | 6E-57   |
|                       |                 |                     |                          |                     | >dbj BAA23814.1  aspartate aminotransferase [Oryza sativa (japonica cultivar-group)]                                                                                                                                                                                                                                                                                                                                                                          | 132   | 7E-56   |
|                       |                 |                     |                          |                     | >dbj BAD54126.1  aspartate transaminase precursor, mitochondrial [Oryza sativa(japonica cultivar-group)]                                                                                                                                                                                                                                                                                                                                                      | 430   | 1E-55   |
|                       |                 |                     |                          |                     | >emb CAA45024.1  aspartate aminotransferase [Panicum miliaceum]dbj BAA04993.1  aspartate aminotransferase [Panicum miliaceum]                                                                                                                                                                                                                                                                                                                                 | 428   | 1E-55   |
|                       |                 |                     |                          |                     | >dbj BAA23815.1  aspartate aminotransferase [Oryza sativa (japonica cultivar-group)]                                                                                                                                                                                                                                                                                                                                                                          | 430   | 1E-55   |
| CD527160              | 6.14E-04        | Mo17<B73=F1         | 1.44                     | 11                  | >gb AAF71261.2  beta-glucosidase aggregating factor precursor [Zea mays]                                                                                                                                                                                                                                                                                                                                                                                      | 306   | 1E-33   |
|                       |                 |                     |                          |                     | >gb AAR20919.1  jasmonate-induced protein [Triticum aestivum]                                                                                                                                                                                                                                                                                                                                                                                                 | 304   | 9E-33   |
|                       |                 |                     |                          |                     | >gb ABA96667.1  jacalin homolog [Oryza sativa (japonica cultivar-group)]                                                                                                                                                                                                                                                                                                                                                                                      | 307   | 2E-32   |
|                       |                 |                     |                          |                     | >gb AAA87041.1  putative 32.6 kDa jasmonate-induced protein [Hordeum vulgare]gb AAB72096.1  32 kDa protein [Hordeum vulgare]                                                                                                                                                                                                                                                                                                                                  | 304   | 3E-32   |
|                       |                 |                     |                          |                     | >gb ABA97248.1  jacalin homolog [Oryza sativa (japonica cultivar-group)]gb ABB51090.1  mannose-specific jacalin-related lectin [Oryza sativa (japonica cultivar-group)]                                                                                                                                                                                                                                                                                       | 306   | 3E-32   |
| CB885343              | 6.15E-04        | Mo17<B73=F1         | 1.45                     | 10                  | >emb CAI64401.1  thioredoxin h2 protein [Zea mays]                                                                                                                                                                                                                                                                                                                                                                                                            | 122   | 7E-57   |
|                       |                 |                     |                          |                     | >pdb 1WMJ A Chain A, Solution Structure Of Thioredoxin Type H From Oryza Sativa                                                                                                                                                                                                                                                                                                                                                                               | 130   | 8E-39   |
|                       |                 |                     |                          |                     | >ref XP_476912.1  Thioredoxin H-type (TRX-H) [Oryza sativa (japonica cultivar-group)]dbj BAD30186.1  Thioredoxin H-type (TRX-H) [Oryza sativa (japonica cultivar-group)] dbj BAC79928.1  Thioredoxin H-type (TRX-H) [Oryza sativa (japonica cultivar-group)] dbj BAA04864.1  thioredoxin h [Oryza sativa (japonica cultivar-group)] sp Q42443 TRXH_ORYZA Thioredoxin H-type (TRX-H) (Phloem sap 13 kDa protein 1) gb AAB51522.1  thioredoxin h [Oryza sativa] |       |         |
|                       |                 |                     |                          |                     | dbj BAA05546.1  thioredoxin h [Oryza sativa]                                                                                                                                                                                                                                                                                                                                                                                                                  | 122   | 1E-38   |
|                       |                 |                     |                          |                     | >gb AAL67139.1  thioredoxin H [Triticum aestivum]                                                                                                                                                                                                                                                                                                                                                                                                             | 118   | 6E-37   |
|                       |                 |                     |                          |                     | >gb AAP72290.1  thioredoxin h isoform 1; HvTrxh1 [Hordeum vulgare subsp. vulgare]                                                                                                                                                                                                                                                                                                                                                                             | 118   | 2E-36   |
| BM266437              | 6.18E-04        | F1=Mo17<B73         | 2.11                     | 9                   | >ref XP_479799.1  putative glycine-rich protein [Oryza sativa (japonica cultivar-group)] dbj BAD33105.1  putative glycine-rich protein [Oryza sativa (japonica cultivar-group)] dbj BAD09035.1  putative glycine-rich protein [Oryza sativa (japonica cultivar-group)]                                                                                                                                                                                        | 328   | 6E-19   |
| DV493328              | 6.23E-04        | Mo17<B73=F1         | 2.11                     | 10                  | >ref NP_916873.1  ubiquitin-conjugating enzyme E2 [Oryza sativa (japonica cultivar-group)] dbj BAC01179.1  putative ubiquitin-conjugating enzyme E2 [Oryza sativa (japonica cultivar-group)] dbj BAB84382.1  putative ubiquitin-conjugating enzyme E2 [Oryza sativa (japonica cultivar-group)]                                                                                                                                                                | 153   | 2E-65   |
|                       |                 |                     |                          |                     | >ref NP_564011.1  ubiquitin conjugating enzyme/ ubiquitin-like activating enzyme[Arabidopsis thaliana] gb AAL31253.1  At1g16890/F17F16.16 [Arabidopsis thaliana] gb AAK96500.1  At1g16890/F17F16.16 [Arabidopsis thaliana] gb AAM63831.1  E2, ubiquitin-conjugating enzyme, putative [Arabidopsis thaliana]                                                                                                                                                   | 153   | 6E-65   |
|                       |                 |                     |                          |                     | gb AAF99844.1  Putative ubiquitin-conjugating enzyme E2 [Arabidopsis thaliana] gb AAY44875.1  ubiquitinating enzyme [Arabidopsis thaliana]                                                                                                                                                                                                                                                                                                                    | 153   | 1E-64   |
|                       |                 |                     |                          |                     | >gb AAZ20286.1  ubiquitin-conjugating enzyme 1 [Arachis hypogaea]                                                                                                                                                                                                                                                                                                                                                                                             |       |         |
|                       |                 |                     |                          |                     | >ref NP_565192.1  ubiquitin conjugating enzyme/ ubiquitin-like activating enzyme[Arabidopsis thaliana] gb AAN18113.1  At1g78870/F9K20_8 [Arabidopsis thaliana] gb AAK83603.1  At1g78870/F9K20_8 [Arabidopsis thaliana] gb AAM63067.1  E2, ubiquitin-conjugating enzyme, putative [Arabidopsis thaliana]                                                                                                                                                       | 153   | 3E-64   |
|                       |                 |                     |                          |                     | gb AAY44874.1  ubiquitinating enzyme [Arabidopsis thaliana]                                                                                                                                                                                                                                                                                                                                                                                                   | 120   | 4E-63   |
|                       |                 |                     |                          |                     | >ref NP_849678.1  ubiquitin conjugating enzyme/ ubiquitin-like activating enzyme[Arabidopsis thaliana]                                                                                                                                                                                                                                                                                                                                                        |       |         |
| BG840735              | 6.31E-04        | Mo17<F1<B73         | 1.51                     | 9                   | >gb AAK63010.1  heme oxygenase 1 [Sorghum bicolor]                                                                                                                                                                                                                                                                                                                                                                                                            | 184   | 1E-30   |
|                       |                 |                     |                          |                     | >dbj BAD35463.1  putative heme oxygenase 1 [Oryza sativa (japonica cultivar-group)]                                                                                                                                                                                                                                                                                                                                                                           | 289   | 3E-28   |
|                       |                 |                     |                          |                     | >gb AAK63012.1  heme oxygenase 1 [Lycopersicon esculentum]                                                                                                                                                                                                                                                                                                                                                                                                    | 278   | 1E-23   |

**Table 4. Microarray analysis results, mode of gene action classification, and BLAST annotation for the 1,367 ESTs identified as differentially expressed among genotypes (15% FDR)**

| GenBank accession no. | Overall P value | Significant pattern | Fold change <sup>‡</sup> | Sector <sup>‡</sup> | BLAST annotation*                                                                                                                                                                                                                                                                                                                                                                                                                                                                                                                                                                                                                                                                                          | Score | E value |
|-----------------------|-----------------|---------------------|--------------------------|---------------------|------------------------------------------------------------------------------------------------------------------------------------------------------------------------------------------------------------------------------------------------------------------------------------------------------------------------------------------------------------------------------------------------------------------------------------------------------------------------------------------------------------------------------------------------------------------------------------------------------------------------------------------------------------------------------------------------------------|-------|---------|
|                       |                 |                     |                          |                     | >emb CAD80091.1  putative heme oxygenase 1 [Momordica charantia]                                                                                                                                                                                                                                                                                                                                                                                                                                                                                                                                                                                                                                           | 129   | 6E-23   |
|                       |                 |                     |                          |                     | >gb AAG42008.2  putative heme oxygenase HO1 [Arabidopsis thaliana]                                                                                                                                                                                                                                                                                                                                                                                                                                                                                                                                                                                                                                         | 268   | 4E-22   |
| DV550895              | 6.40E-04        | Mo17<B73=F1         | 1.76                     | 10                  | >ref XP_473296.1  OSJNBb0039L24.13 [Oryza sativa (japonica cultivar-group)]emb CAE04574.1  OSJNBb0039L24.13 [Oryza sativa (japonica cultivar-group)]                                                                                                                                                                                                                                                                                                                                                                                                                                                                                                                                                       | 206   | 2E-20   |
|                       |                 |                     |                          |                     | >gb AAM63910.1  remorin [Arabidopsis thaliana]                                                                                                                                                                                                                                                                                                                                                                                                                                                                                                                                                                                                                                                             | 202   | 3E-15   |
|                       |                 |                     |                          |                     | >ref NP_197764.1  DNA binding [Arabidopsis thaliana]gb AAN15335.1  Unknown protein [Arabidopsis thaliana] gb AAK62451.1  Unknown protein [Arabidopsis thaliana] dbj BAB10048.1  unnamed protein product [Arabidopsis thaliana]                                                                                                                                                                                                                                                                                                                                                                                                                                                                             | 202   | 3E-15   |
|                       |                 |                     |                          |                     | >ref NP_974824.1  DNA binding [Arabidopsis thaliana]                                                                                                                                                                                                                                                                                                                                                                                                                                                                                                                                                                                                                                                       | 201   | 3E-15   |
|                       |                 |                     |                          |                     | >gb AAD28506.1  remorin 1 [Lycopersicon esculentum]                                                                                                                                                                                                                                                                                                                                                                                                                                                                                                                                                                                                                                                        | 197   | 8E-15   |
| DV943052              | 6.45E-04        | Mo17<B73=F1         | 2.97                     | 10                  | ns                                                                                                                                                                                                                                                                                                                                                                                                                                                                                                                                                                                                                                                                                                         |       |         |
| BM269155              | 6.48E-04        | Mo17<B73=F1         | 1.76                     | 10                  | ns                                                                                                                                                                                                                                                                                                                                                                                                                                                                                                                                                                                                                                                                                                         |       |         |
| DV550769              | 6.65E-04        | B73=F1<Mo17         | 1.97                     | 4                   | >ref XP_473863.1  OSJNBa0070C17.11 [Oryza sativa (japonica cultivar-group)]emb CAE05204.3  OSJNBa0070C17.11 [Oryza sativa (japonica cultivar-group)]                                                                                                                                                                                                                                                                                                                                                                                                                                                                                                                                                       | 154   | 3E-8    |
|                       |                 |                     |                          |                     | >ref XP_473862.1  OSJNBa0070C17.10 [Oryza sativa (japonica cultivar-group)]emb CAE05203.3  OSJNBa0070C17.10 [Oryza sativa (japonica cultivar-group)]                                                                                                                                                                                                                                                                                                                                                                                                                                                                                                                                                       | 202   | 2E-6    |
| BG842405              | 6.71E-04        | Mo17<B73=F1         | 1.48                     | 10                  | >dbj BAA32348.1  ferredoxin [Zea mays]                                                                                                                                                                                                                                                                                                                                                                                                                                                                                                                                                                                                                                                                     | 140   | 4E-22   |
|                       |                 |                     |                          |                     | >sp P27789 FER5 MAIZE Ferredoxin-5, chloroplast precursor (Ferredoxin V) (Fd V)gb AAA33462.1  ferredoxin prf 1907324A ferredoxin:ISOTYPE=V                                                                                                                                                                                                                                                                                                                                                                                                                                                                                                                                                                 | 135   | 1E-19   |
|                       |                 |                     |                          |                     | >sp P27787 FER1_MAIZE Ferredoxin-1, chloroplast precursor (Ferredoxin I) (Fd I)gb AAA33460.1  ferredoxin gb AAA33459.1  ferredoxin prf 1907324B ferredoxin:ISOTYPE=I                                                                                                                                                                                                                                                                                                                                                                                                                                                                                                                                       | 150   | 4E-17   |
|                       |                 |                     |                          |                     | >pdb 1GAQ B Chain B, Crystal Structure Of The Complex Between Ferredoxin AndFerredoxin-Nadp+ Reductase                                                                                                                                                                                                                                                                                                                                                                                                                                                                                                                                                                                                     | 98    | 4E-17   |
|                       |                 |                     |                          |                     | >ref XP_479678.1  Ferredoxin I, chloroplast precursor [Oryza sativa (japonica cultivar-group)] ref XP_507559.1  PREDICTED OJ1300_E01.1 gene product [Oryza sativa (japonica cultivar-group)] ref XP_507558.1  PREDICTED OJ1300_E01.1 gene product [Oryza sativa (japonica cultivar-group)] ref XP_507082.1  PREDICTED OJ1300_E01.1 gene product [Oryza sativa (japonica cultivar-group)] dbj BAD08924.1  Ferredoxin I, chloroplast precursor [Oryza sativa (japonica cultivar-group)] sp P11051 FER1_ORYSA Ferredoxin-1, chloroplast precursor (Ferredoxin I) (Anti-disease protein 1) pir FERZ ferredoxin [2Fe-2S] I precursor - rice dbj BAA06436.1  ferredoxin [Oryza sativa (japonica cultivar-group)] | 139   | 5E-17   |
| DV494441              | 6.74E-04        | B73<F1=Mo17         | 1.44                     | 3                   | >emb CAA33620.1  GAPDH [Zea mays]sp P08735 G3PC MAIZE Glyceraldehyde-3-phosphate dehydrogenase, cytosolic 1                                                                                                                                                                                                                                                                                                                                                                                                                                                                                                                                                                                                | 337   | 3E-89   |
|                       |                 |                     |                          |                     | >emb CAA30151.1  unnamed protein product [Zea mays]                                                                                                                                                                                                                                                                                                                                                                                                                                                                                                                                                                                                                                                        | 337   | 8E-89   |
|                       |                 |                     |                          |                     | >emb CAA51676.1  glyceraldehyde 3-phosphate dehydrogenase (phosphorylating) [Zeamays] sp Q09054 G3PD_MAIZE Glyceraldehyde-3-phosphate dehydrogenase, cytosolic 2 gb AAA87880.1  glyceraldehyde-3-phosphate dehydrogenase gb AAA87578.1  cytosolic glyceroldehde-3-phosphate dehydrogenase GAPC2                                                                                                                                                                                                                                                                                                                                                                                                            | 337   | 2E-87   |
|                       |                 |                     |                          |                     | >gb AAA33466.1  glyceraldehyde-3-phosphate dehydrogenase [Zea mays]                                                                                                                                                                                                                                                                                                                                                                                                                                                                                                                                                                                                                                        | 247   | 2E-87   |
|                       |                 |                     |                          |                     | >emb CAA42901.1  glyceraldehyde 3-phosphate dehydrogenase [Hordeum vulgare]sp P26517 G3PX_HORVU Glyceraldehyde-3-phosphate dehydrogenase, cytosolic                                                                                                                                                                                                                                                                                                                                                                                                                                                                                                                                                        | 337   | 2E-84   |
| BM335843              | 6.86E-04        | Mo17<B73=F1         | 1.61                     | 10                  | >gb AAT77918.1  putative NUDIX hydrolase [Oryza sativa (japonica cultivar-group)]                                                                                                                                                                                                                                                                                                                                                                                                                                                                                                                                                                                                                          | 183   | 3E-47   |
|                       |                 |                     |                          |                     | >ref NP_911373.2  MutT-like protein [Oryza sativa (japonica cultivar-group)]dbj BAD31700.1  MutT-like protein [Oryza sativa (japonica cultivar-group)] dbj BAC16411.2  MutT-like protein [Oryza sativa (japonica cultivar-group)]                                                                                                                                                                                                                                                                                                                                                                                                                                                                          | 182   | 3E-37   |
|                       |                 |                     |                          |                     | >ref NP_566428.1  hydrolase [Arabidopsis thaliana]gb AAG40353.1  AT3g12600 [Arabidopsis thaliana] gb AAK49630.1  AT3g12600/T2E22_108 [Arabidopsis thaliana] gb AAG51020.1  unknown protein; 22985-21799 [Arabidopsis thaliana] dbj BAB02251.1  unnamed protein product [Arabidopsis thaliana] gb AAO11575.1  At3g12600/T2E22_108 [Arabidopsis thaliana] sp Q9LHK1 NUD16 ARATH Nudix hydrolase 16, mitochondrial precursor (AtNUDT16)                                                                                                                                                                                                                                                                       | 180   | 9E-29   |
|                       |                 |                     |                          |                     | >ref XP_465994.1  MutT-like protein [Oryza sativa (japonica cultivar-group)]dbj BAD26313.1  MutT-like protein [Oryza sativa (japonica cultivar-group)]                                                                                                                                                                                                                                                                                                                                                                                                                                                                                                                                                     | 204   | 2E-16   |
|                       |                 |                     |                          |                     | >gb ABA94049.1  hydrolase, NUDIX family, putative [Oryza sativa (japonica cultivar-group)]                                                                                                                                                                                                                                                                                                                                                                                                                                                                                                                                                                                                                 | 217   | 1E-15   |
| DV622613              | 6.87E-04        | Mo17<B73=F1         | 1.35                     | 11                  | >emb CAA29928.1  unnamed protein product [Zea mays]sp P12653 GSTF1 MAIZE Glutathione S-transferase I (GST-I) (GST-29) (GST class-phi)                                                                                                                                                                                                                                                                                                                                                                                                                                                                                                                                                                      | 214   | 2E-72   |
|                       |                 |                     |                          |                     | >gb AAA72758.1  glutathione S-transferase                                                                                                                                                                                                                                                                                                                                                                                                                                                                                                                                                                                                                                                                  | 214   | 2E-72   |
|                       |                 |                     |                          |                     | >pdb 1BYE D Chain D, Glutathione S-Transferase I From Mais In Complex WithAtrazine Glutathione Conjugate pdb 1BYE C Chain C, Glutathione S-Transferase I From Mais In Complex With Atrazine Glutathione Conjugate pdb 1BYE B Chain B, Glutathione S-Transferase I From Mais In Complex With Atrazine Glutathione Conjugate pdb 1BYE A Chain A, Glutathione S-Transferase I From Mais In Complex With Atrazine Glutathione Conjugate                                                                                                                                                                                                                                                                        | 213   | 2E-72   |
|                       |                 |                     |                          |                     | >gb AAA33470.1  glutathione S-transferase [gb AAA33469.1  glutathione S-transferase 1 prf 1303351A transferase,glutathione S                                                                                                                                                                                                                                                                                                                                                                                                                                                                                                                                                                               | 214   | 1E-71   |
|                       |                 |                     |                          |                     | >pdb 1AXD B Chain B, Structure Of Glutathione S-Transferase-I Bound With TheLigand Lactoylglutathione pdb 1AXD A Chain A, Structure Of Glutathione S-Transferase-I Bound With The Ligand Lactoylglutathione                                                                                                                                                                                                                                                                                                                                                                                                                                                                                                | 209   | 5E-70   |
| CD484423              | 6.87E-04        | Mo17<B73=F1         | 1.28                     | 10                  | >gb AAF71261.2  beta-glucosidase aggregating factor precursor [Zea mays]                                                                                                                                                                                                                                                                                                                                                                                                                                                                                                                                                                                                                                   | 306   | 3E-36   |
|                       |                 |                     |                          |                     | >gb ABA96667.1  jacalin homolog [Oryza sativa (japonica cultivar-group)]                                                                                                                                                                                                                                                                                                                                                                                                                                                                                                                                                                                                                                   | 307   | 3E-34   |
|                       |                 |                     |                          |                     | >gb AAR20919.1  jasmonate-induced protein [Triticum aestivum]                                                                                                                                                                                                                                                                                                                                                                                                                                                                                                                                                                                                                                              | 304   | 1E-33   |
|                       |                 |                     |                          |                     | >gb ABA97248.1  jacalin homolog [Oryza sativa (japonica cultivar-group)]gb ABB51090.1  mannose-specific jacalin-related lectin [Oryza sativa (japonica cultivar-group)]                                                                                                                                                                                                                                                                                                                                                                                                                                                                                                                                    | 306   | 2E-33   |
|                       |                 |                     |                          |                     | >gb AAB72098.1  32 kDa protein [Hordeum vulgare]                                                                                                                                                                                                                                                                                                                                                                                                                                                                                                                                                                                                                                                           | 306   | 7E-33   |
| DV550469              | 6.87E-04        | B73=F1<Mo17         | 1.73                     | 4                   | >gb ABA94013.1  hypothetical protein LOC_Os11g32320 [Oryza sativa (japonica cultivar-group)]                                                                                                                                                                                                                                                                                                                                                                                                                                                                                                                                                                                                               | 265   | 1E-33   |

**Table 4. Microarray analysis results, mode of gene action classification, and BLAST annotation for the 1,367 ESTs identified as differentially expressed among genotypes (15% FDR)**

| GenBank accession no. | Overall P value | Significant pattern | Fold change <sup>†</sup> | Sector <sup>‡</sup> | BLAST annotation*                                                                                                                                                                                                                                                                                                                                                                                                                                                                                                                                                                  | Score | E value |
|-----------------------|-----------------|---------------------|--------------------------|---------------------|------------------------------------------------------------------------------------------------------------------------------------------------------------------------------------------------------------------------------------------------------------------------------------------------------------------------------------------------------------------------------------------------------------------------------------------------------------------------------------------------------------------------------------------------------------------------------------|-------|---------|
| CB331508              | 6.96E-04        | Mo17<B73=F1         | 1.34                     | 10                  | >ref NP_566797.1  unknown protein [Arabidopsis thaliana]gb AAM98166.1  expressed protein [Arabidopsis thaliana] gb AAM64687.1  unknown [Arabidopsis thaliana] gb AAP13402.1  AT3g26710 [Arabidopsis thaliana] dbj BAB01734.1  unnamed protein product [Arabidopsis thaliana]                                                                                                                                                                                                                                                                                                       | 267   | 9E-24   |
|                       |                 |                     |                          |                     | >emb CAA66820.1  hypothetical protein [Arabidopsis thaliana]                                                                                                                                                                                                                                                                                                                                                                                                                                                                                                                       | 216   | 7E-19   |
|                       |                 |                     |                          |                     | >sp P19950 RS141 MAIZE 40S ribosomal protein S14 (Clone MCH1)                                                                                                                                                                                                                                                                                                                                                                                                                                                                                                                      | 149   | 1E-46   |
|                       |                 |                     |                          |                     | >ref XP_472410.1  OJ000126_13.9 [Oryza sativa (japonica cultivar-group)]emb CAE02065.2  OJ000126_13.9 [Oryza sativa (japonica cultivar-group)] dbj BAD29299.1  40S ribosomal protein S14 [Oryza sativa (japonica cultivar-group)] dbj BAD27798.1  40S ribosomal protein S14 [Oryza sativa (japonica cultivar-group)]                                                                                                                                                                                                                                                               | 151   | 2E-46   |
|                       |                 |                     |                          |                     | >ref XP_464199.1  putative ribosomal protein S14 [Oryza sativa (japonica cultivar-group)] ref XP_506724.1  PREDICTED OJ9003_G05.34 gene product [Oryza sativa (japonica cultivar-group)] dbj BAD25218.1  putative ribosomal protein S14 [Oryza sativa (japonica cultivar-group)]                                                                                                                                                                                                                                                                                                   | 150   | 2E-46   |
| DV621991              | 7.03E-04        | B73=F1<Mo17         | 1.33                     | 4                   | >sp P19951 RS142 MAIZE 40S ribosomal protein S14 (Clone MCH2)                                                                                                                                                                                                                                                                                                                                                                                                                                                                                                                      | 150   | 2E-46   |
|                       |                 |                     |                          |                     | >gb AAO41731.1  cytoplasmic ribosomal protein S14 [Brassica napus]                                                                                                                                                                                                                                                                                                                                                                                                                                                                                                                 | 150   | 7E-46   |
|                       |                 |                     |                          |                     | >ref NP_915675.1  putative protein kinase SPK-3 [Oryza sativa (japonica cultivar-group)] dbj BAB89813.1  serine/threonine protein kinase SAPK4 [Oryza sativa (japonica cultivar-group)] dbj BAB64101.1  serine/threonine protein kinase SAPK4 [Oryza sativa (japonica cultivar-group)] dbj BAD18000.1  serine/threonine protein kinase SAPK4 [Oryza sativa (japonica cultivar-group)] sp Q5N942 SAPK4_ORYSA Serine/threonine-protein kinase SAPK4 (Osmotic stress/abscisic acid-activated protein kinase 4)                                                                        | 360   | 3E-70   |
|                       |                 |                     |                          |                     | >ref XP_472550.1  OSJNBa0084A10.11 [Oryza sativa (japonica cultivar-group)]dbj BAD18003.1  serine/threonine protein kinase SAPK7 [Oryza sativa (japonica cultivar-group)] sp Q7XQP4 SAPK7 ORYSA Serine/threonine-protein kinase SAPK7 (Osmotic stress/abscisic acid-activated protein kinase 7)                                                                                                                                                                                                                                                                                    | 359   | 2E-59   |
|                       |                 |                     |                          |                     | >gb AAB68961.1  protein kinase 3 [Glycine max]                                                                                                                                                                                                                                                                                                                                                                                                                                                                                                                                     | 351   | 4E-59   |
| DV492325              | 7.09E-04        | Mo17<F1<B73         | 1.84                     | 9                   | >emb CAE03037.3  OSJNBa0084A10.12 [Oryza sativa (japonica cultivar-group)]                                                                                                                                                                                                                                                                                                                                                                                                                                                                                                         | 407   | 4E-59   |
|                       |                 |                     |                          |                     | >gb AAU43772.1  putative salt-inducible protein kinase [Zea mays]                                                                                                                                                                                                                                                                                                                                                                                                                                                                                                                  | 364   | 6E-59   |
|                       |                 |                     |                          |                     | >ref XP_473945.1  OSJNBa0053K19.11 [Oryza sativa (japonica cultivar-group)]emb CAE03503.2  OSJNBa0053K19.11 [Oryza sativa (japonica cultivar-group)]                                                                                                                                                                                                                                                                                                                                                                                                                               | 408   | 5E-60   |
|                       |                 |                     |                          |                     | >emb CAA81081.1  T-protein [Solanum tuberosum]sp P54260 GCST_SOLTU Aminomethyltransferase, mitochondrial precursor (Glycine cleavage system T protein) (GCVT)                                                                                                                                                                                                                                                                                                                                                                                                                      | 406   | 1E-53   |
|                       |                 |                     |                          |                     | >emb CAA81077.1  T protein [Flaveria pringlei]sp P49363 GCST_FLAPR Aminomethyltransferase, mitochondrial precursor (Glycine cleavage system T protein) (GCVT)                                                                                                                                                                                                                                                                                                                                                                                                                      | 407   | 2E-52   |
| DV621817              | 7.26E-04        | B73=F1<Mo17         | 1.42                     | 4                   | >emb CAA94902.1  T-protein [Flaveria anomala]sp O49849 GCST_FLAAN Aminomethyltransferase, mitochondrial precursor (Glycine cleavage system T protein) (GCVT)                                                                                                                                                                                                                                                                                                                                                                                                                       | 407   | 2E-52   |
|                       |                 |                     |                          |                     | >emb CAB16917.1  T-Protein precursor [Flaveria trinervia]sp O23936 GCST_FLATR Aminomethyltransferase, mitochondrial precursor (Glycine cleavage system T protein) (GCVT)                                                                                                                                                                                                                                                                                                                                                                                                           | 407   | 6E-52   |
|                       |                 |                     |                          |                     | >gb AAT93850.1  unknown protein [Oryza sativa (japonica cultivar-group)]gb AAS98480.1  unknown protein [Oryza sativa (japonica cultivar-group)]                                                                                                                                                                                                                                                                                                                                                                                                                                    | 989   | 3E-53   |
|                       |                 |                     |                          |                     | >emb CAB87716.1  putative protein [Arabidopsis thaliana]                                                                                                                                                                                                                                                                                                                                                                                                                                                                                                                           | 955   | 5E-47   |
|                       |                 |                     |                          |                     | >ref NP_196717.2  catalytic [Arabidopsis thaliana]                                                                                                                                                                                                                                                                                                                                                                                                                                                                                                                                 | 978   | 5E-47   |
| CD485034              | 7.32E-04        | F1=Mo17<B73         | 1.51                     | 9                   | >ref XP_795069.1  PREDICTED: similar to CG2943-PA [Strongylocentrotus purpuratus]                                                                                                                                                                                                                                                                                                                                                                                                                                                                                                  | 204   | 4E-16   |
|                       |                 |                     |                          |                     | >emb CAI22235.1  novel protein [Homo sapiens]                                                                                                                                                                                                                                                                                                                                                                                                                                                                                                                                      | 971   | 6E-16   |
|                       |                 |                     |                          |                     | >dbj BAD73816.1  putative copper chaperone [Oryza sativa (japonica cultivar-group)]                                                                                                                                                                                                                                                                                                                                                                                                                                                                                                | 252   | 8E-8    |
|                       |                 |                     |                          |                     | >ref XP_466081.1  copper chaperone homolog CCH [Oryza sativa (japonica cultivar-group)] dbj BAD25440.1  copper chaperone homolog CCH [Oryza sativa (japonica cultivar-group)] gb AAF15285.1  copper chaperone homolog CCH [Oryza sativa]                                                                                                                                                                                                                                                                                                                                           | 132   | 8E-8    |
|                       |                 |                     |                          |                     | >ref NP_191183.1  CCH [Arabidopsis thaliana]emb CAB87423.1  copper homeostasis factor [Arabidopsis thaliana] gb AAK32872.1  AT3g56240/F18O21_200 [Arabidopsis thaliana] gb AAL47423.1  AT3g56240/F18O21_200 [Arabidopsis thaliana] gb AAM62878.1  copper homeostasis factor [Arabidopsis thaliana]                                                                                                                                                                                                                                                                                 | 121   | 1E-7    |
| CB886106              | 7.33E-04        | Mo17<B73=F1         | 1.38                     | 10                  | >gb AAC33510.1  copper homeostasis factor [Arabidopsis thaliana]                                                                                                                                                                                                                                                                                                                                                                                                                                                                                                                   | 112   | 2E-7    |
|                       |                 |                     |                          |                     | >emb CAE51321.1  chopper chaperone [Hordeum vulgare subsp. vulgare]                                                                                                                                                                                                                                                                                                                                                                                                                                                                                                                | 130   | 4E-6    |
|                       |                 |                     |                          |                     | >gb AAF15286.1  copper chaperone homolog CCH [Glycine max]                                                                                                                                                                                                                                                                                                                                                                                                                                                                                                                         | ns    |         |
|                       |                 |                     |                          |                     | >dbj BAD22146.1  putative 26S proteasome non-ATPase regulatory subunit 6 (26Sproteasome regulatory particle non-ATPase subunit 7) (OsRPN7) [Oryza sativa (japonica cultivar-group)]                                                                                                                                                                                                                                                                                                                                                                                                | 388   | 2E-61   |
|                       |                 |                     |                          |                     | >ref XP_472939.1  OSJNBa0081L15.15 [Oryza sativa (japonica cultivar-group)]emb CAD41392.2  OJ000223_09.5 [Oryza sativa (japonica cultivar-group)] emb CAE03153.2  OSJNBa0081L15.15 [Oryza sativa (japonica cultivar-group)] sp Q8W425 PSD6_ORYSA 26S proteasome non-ATPase regulatory subunit 6 (26S proteasome regulatory particle non-ATPase subunit 7) (OsRPN7) dbj BAB78486.1  26S proteasome regulatory particle non-ATPase subunit7 [Oryza sativa (japonica cultivar-group)]                                                                                                 | 389   | 7E-59   |
| DV621876              | 7.34E-04        | Mo17<B73=F1         | 1.46                     | 10                  | >gb AAC32134.1  KIAA0107-like protein [Picea mariana]                                                                                                                                                                                                                                                                                                                                                                                                                                                                                                                              | 232   | 5E-57   |
|                       |                 |                     |                          |                     | >ref NP_567709.1  unknown protein [Arabidopsis thaliana]ref NP_974611.1  unknown protein [Arabidopsis thaliana] gb AAP86665.1  26S proteasome subunit RPN7 [Arabidopsis thaliana] gb AAN31800.1  putative proteasome regulatory subunit [Arabidopsis thaliana] gb AAM13268.1  putative proteasome regulatory subunit [Arabidopsis thaliana] gb AAK96691.1  putative proteasome regulatory subunit [Arabidopsis thaliana] gb AAM65400.1  putative proteasome regulatory subunit [Arabidopsis thaliana] sp Q93Y35 PSD6 ARATH Probable 26S proteasome non-ATPase regulatory subunit 6 | 387   | 2E-54   |

**Table 4. Microarray analysis results, mode of gene action classification, and BLAST annotation for the 1,367 ESTs identified as differentially expressed among genotypes (15% FDR)**

| GenBank accession no. | Overall P value | Significant pattern | Fold change <sup>±</sup> | Sector <sup>±</sup> | BLAST annotation*                                                                                                                                                                                                                                                                                                                                                                                                                           | Score | E value |
|-----------------------|-----------------|---------------------|--------------------------|---------------------|---------------------------------------------------------------------------------------------------------------------------------------------------------------------------------------------------------------------------------------------------------------------------------------------------------------------------------------------------------------------------------------------------------------------------------------------|-------|---------|
| CB617292              | 7.41E-04        | Mo17<F1<B73         | 1.41                     | 10                  | >emb CAB79392.1  putative proteasome regulatory subunit [Arabidopsis thaliana]emb CAB41122.1  putative proteasome regulatory subunit [Arabidopsis thaliana]                                                                                                                                                                                                                                                                                 | 406   | 1E-52   |
|                       |                 |                     |                          |                     | pir T06666.26S proteasome regulatory particle chain RPN7 homolog F6I7.30 - Arabidopsis thaliana                                                                                                                                                                                                                                                                                                                                             |       |         |
|                       |                 |                     |                          |                     | >ref XP_468402.1  putative NADH dehydrogenase [Oryza sativa (japonica cultivar-group)] dbj BAD22016.1  putative NADH dehydrogenase [Oryza sativa (japonica cultivar-group)] dbj BAD21515.1  putative NADH dehydrogenase [Oryza sativa (japonica cultivar-group)]                                                                                                                                                                            | 408   | 8E-87   |
|                       |                 |                     |                          |                     | >ref NP_565469.1  unknown protein [Arabidopsis thaliana]gb AAT68351.1  hypothetical protein At2g20360 [Arabidopsis thaliana] gb AAK93749.1  putative NADH-ubiquinone oxidoreductase [Arabidopsis thaliana] gb AAK59545.1  putative NADH-ubiquinone oxidoreductase [Arabidopsis thaliana] gb AAD21752.2  putative NADH-ubiquinone oxidoreductase [Arabidopsis thaliana] gb AAK23820.1  hypothetical protein At2g20360 [Arabidopsis thaliana] | 402   | 6E-61   |
|                       |                 |                     |                          |                     | >ref XP_508942.1  PREDICTED: NADH dehydrogenase (ubiquinone) 1 alpha subcomplex, 9.39kDa [Pan troglodytes]                                                                                                                                                                                                                                                                                                                                  | 347   | 2E-32   |
|                       |                 |                     |                          |                     | >emb CAH92896.1  hypothetical protein [Pongo pygmaeus]                                                                                                                                                                                                                                                                                                                                                                                      | 377   | 3E-32   |
| CD484530              | 7.44E-04        | B73<F1<Mo17         | 1.58                     | 4                   | >gb AAH91192.1  Ndufa9 protein [Rattus norvegicus]                                                                                                                                                                                                                                                                                                                                                                                          | 370   | 3E-32   |
|                       |                 |                     |                          |                     | >ref XP_483802.1  putative ripening regulated protein DDTFR18 [Oryza sativa (japonica cultivar-group)] dbj BAD09618.1  putative ripening regulated protein DDTFR18 [Oryza sativa (japonica cultivar-group)]                                                                                                                                                                                                                                 | 434   | 2E-71   |
|                       |                 |                     |                          |                     | >ref NP_194294.2  antiporter/ drug transporter [Arabidopsis thaliana]                                                                                                                                                                                                                                                                                                                                                                       | 488   | 7E-62   |
|                       |                 |                     |                          |                     | >ref XP_483803.1  putative ripening regulated protein DDTFR18 [Oryza sativa (japonica cultivar-group)] dbj BAD09619.1  putative ripening regulated protein DDTFR18 [Oryza sativa (japonica cultivar-group)]                                                                                                                                                                                                                                 | 451   | 9E-62   |
|                       |                 |                     |                          |                     | >ref NP_567173.3  antiporter/ drug transporter/ transporter [Arabidopsis thaliana]                                                                                                                                                                                                                                                                                                                                                          | 542   | 3E-60   |
|                       |                 |                     |                          |                     | >gb AAO42212.1  unknown protein [Arabidopsis thaliana]                                                                                                                                                                                                                                                                                                                                                                                      | 514   | 8E-60   |
| CB604570              | 7.45E-04        | B73=F1<Mo17         | 1.39                     | 4                   | >emb CAA37828.1  unnamed protein product [Petroselinum crispum]sp P19177 H2A PETCR Histone H2A                                                                                                                                                                                                                                                                                                                                              | 149   | 2E-39   |
|                       |                 |                     |                          |                     | >gb AAT08677.1  histone H2A [Hyacinthus orientalis]                                                                                                                                                                                                                                                                                                                                                                                         | 152   | 7E-39   |
|                       |                 |                     |                          |                     | >sp P02276 H2A2 WHEAT Histone H2A.2.1                                                                                                                                                                                                                                                                                                                                                                                                       | 151   | 7E-39   |
|                       |                 |                     |                          |                     | >sp P40280 H2A MAIZE Histone H2A Agb AAB04687.1  histone H2A                                                                                                                                                                                                                                                                                                                                                                                | 159   | 7E-39   |
|                       |                 |                     |                          |                     | >ref NP_918596.1  putative histone H2A [Oryza sativa (japonica cultivar-group)]dbj BAB44136.1  putative histone H2A [Oryza sativa (japonica cultivar-group)]                                                                                                                                                                                                                                                                                | 159   | 9E-39   |
|                       |                 |                     |                          |                     | >ref NP_922361.1  putative Ste20-related protein kinase [Oryza sativa (japonica cultivar-group)] gb AAG13441.1  putative Ste20-related protein kinase [Oryza sativa (japonica cultivar-group)]                                                                                                                                                                                                                                              | 643   | 3E-46   |
| DV942339              | 7.61E-04        | B73<F1=Mo17         | 1.62                     | 3                   | >ref NP_912431.1  Putative Ste20-related protein kinase [Oryza sativa (japonica cultivar-group)] gb AAO17022.1  Putative Ste20-related protein kinase [Oryza sativa (japonica cultivar-group)]                                                                                                                                                                                                                                              | 645   | 1E-25   |
|                       |                 |                     |                          |                     | >ref NP_192811.3  ATP binding / kinase/ protein kinase/ protein serine/threoninekinase/ protein-tyrosine kinase [Arabidopsis thaliana]                                                                                                                                                                                                                                                                                                      | 708   | 3E-14   |
|                       |                 |                     |                          |                     | >ref NP_194141.2  ATP binding / kinase/ protein kinase/ protein serine/threoninekinase/ protein-tyrosine kinase [Arabidopsis thaliana] gb AAM91677.1  unknown protein [Arabidopsis thaliana] gb AAM14047.1  unknown protein [Arabidopsis thaliana]                                                                                                                                                                                          | 709   | 2E-11   |
|                       |                 |                     |                          |                     | >emb CAB81174.1  putative protein kinase [Arabidopsis thaliana]                                                                                                                                                                                                                                                                                                                                                                             | 693   | 5E-11   |
|                       |                 |                     |                          |                     | >emb CAI64400.1  thioredoxin h1 protein [Zea mays]                                                                                                                                                                                                                                                                                                                                                                                          | 128   | 1E-40   |
|                       |                 |                     |                          |                     | >ref XP_475666.1  putative thioredoxin H-type (TRX-H) (TrxTa) [Oryza sativa (japonica cultivar-group)] gb AAT44260.1  putative thioredoxin H-type (TRX-H) (TrxTa) [Oryza sativa (japonica cultivar-group)]                                                                                                                                                                                                                                  | 121   | 3E-32   |
| CB334571              | 7.67E-04        | Mo17<B73=F1         | 1.41                     | 11                  | >dbj BAB20886.1  thioredoxin h [Oryza sativa (japonica cultivar-group)]                                                                                                                                                                                                                                                                                                                                                                     | 121   | 3E-32   |
|                       |                 |                     |                          |                     | >gb AAP72291.1  thioredoxin h isoform 2; HvTrxh2 [Hordeum vulgare subsp. vulgare]                                                                                                                                                                                                                                                                                                                                                           | 122   | 1E-31   |
|                       |                 |                     |                          |                     | >gb AAF88067.1  thioredoxin H [Triticum aestivum]emb CAB96931.1  thioredoxin h [Triticum aestivum]                                                                                                                                                                                                                                                                                                                                          | 125   | 5E-31   |
|                       |                 |                     |                          |                     | >gb AAV50043.1  metallothionein-like protein [Saccharum hybrid cultivar]                                                                                                                                                                                                                                                                                                                                                                    | 81    | 9E-7    |
|                       |                 |                     |                          |                     | >gb AAS88721.1  metallothionein-like protein [Cynodon dactylon]                                                                                                                                                                                                                                                                                                                                                                             | 81    | 2E-6    |
|                       |                 |                     |                          |                     | >ref XP_463045.1  expressed protein [Oryza sativa (japonica cultivar-group)]gb AAS07181.1  expressed protein [Oryza sativa (japonica cultivar-group)]                                                                                                                                                                                                                                                                                       | 91    | 5E-18   |
| DV550678              | 7.90E-04        | Mo17<B73=F1         | 1.44                     | 10                  | >emb CAJ13713.1  hypothetical protein [Capsicum chinense]                                                                                                                                                                                                                                                                                                                                                                                   | 96    | 1E-16   |
|                       |                 |                     |                          |                     | >ref NP_850005.1  unknown protein [Arabidopsis thaliana]gb AAK00397.1  unknown protein [Arabidopsis thaliana] gb AAG41478.1  unknown protein [Arabidopsis thaliana] gb AAL06786.1  At2g20820/F5H14.21 [Arabidopsis thaliana] gb AAG40023.1  At2g20820 [Arabidopsis thaliana] gb AAK55709.1  At2g20820/F5H14.21 [Arabidopsis thaliana]                                                                                                       | 93    | 2E-15   |
|                       |                 |                     |                          |                     | >ref NP_850006.1  unknown protein [Arabidopsis thaliana]gb AAD20913.2  expressed protein [Arabidopsis thaliana] gb AAM67005.1  unknown [Arabidopsis thaliana]                                                                                                                                                                                                                                                                               | 102   | 9E-6    |
|                       |                 |                     |                          |                     | >emb CAA33620.1  GAPDH [Zea mays]sp P08735 G3PC MAIZE Glyceraldehyde-3-phosphate dehydrogenase, cytosolic 1                                                                                                                                                                                                                                                                                                                                 | 337   | 1E-66   |
|                       |                 |                     |                          |                     | >emb CAA30151.1  unnamed protein product [Zea mays]                                                                                                                                                                                                                                                                                                                                                                                         | 337   | 3E-66   |
|                       |                 |                     |                          |                     | >emb CAA51676.1  glyceraldehyde 3-phosphate dehydrogenase (phosphorylating) [Zeamays] sp Q09054 G3PD_MAIZE Glyceraldehyde-3-phosphate dehydrogenase, cytosolic 2 gb AAA87880.1  glyceraldehyde-3-phosphate dehydrogenase gb AAA87578.1  cytosolic glyceroldehyde-3-phosphate dehydrogenase GAPC2                                                                                                                                            | 337   | 5E-65   |
| DV493051              | 7.95E-04        | B73<F1=Mo17         | 1.47                     | 3                   | >gb AAA33466.1  glyceraldehyde-3-phosphate dehydrogenase [Zea mays]                                                                                                                                                                                                                                                                                                                                                                         | 247   | 5E-65   |
|                       |                 |                     |                          |                     | >emb CAA42901.1  glyceraldehyde 3-phosphate dehydrogenase [Hordeum vulgare]sp P26517 G3PX_HORVU Glyceraldehyde-3-phosphate dehydrogenase, cytosolic                                                                                                                                                                                                                                                                                         | 337   | 2E-62   |

**Table 4. Microarray analysis results, mode of gene action classification, and BLAST annotation for the 1,367 ESTs identified as differentially expressed among genotypes (15% FDR)**

| GenBank accession no. | Overall P value | Significant pattern | Fold change <sup>†</sup> | Sector <sup>‡</sup> | BLAST annotation*                                                                                                                                                                                                                                                                                                                                                                                                                                                                           | Score | E value |
|-----------------------|-----------------|---------------------|--------------------------|---------------------|---------------------------------------------------------------------------------------------------------------------------------------------------------------------------------------------------------------------------------------------------------------------------------------------------------------------------------------------------------------------------------------------------------------------------------------------------------------------------------------------|-------|---------|
| CD484434              | 7.98E-04        | Mo17<B73=F1         | 1.43                     | 11                  | >ref NP_910221.1  unknown protein [Oryza sativa (japonica cultivar-group)]dbj BAA90629.1  unknown protein [Oryza sativa (japonica cultivar-group)]                                                                                                                                                                                                                                                                                                                                          | 230   | 7E-42   |
|                       |                 |                     |                          |                     | >gb AAM64310.1  unknown [Arabidopsis thaliana]                                                                                                                                                                                                                                                                                                                                                                                                                                              | 230   | 6E-33   |
|                       |                 |                     |                          |                     | >gb AAL66902.1  unknown protein [Arabidopsis thaliana]gb AAK96864.1  Unknown protein [Arabidopsis thaliana]                                                                                                                                                                                                                                                                                                                                                                                 | 230   | 2E-32   |
|                       |                 |                     |                          |                     | >ref NP_566447.1  unknown protein [Arabidopsis thaliana]dbj BAB01412.1  unnamed protein product [Arabidopsis thaliana]                                                                                                                                                                                                                                                                                                                                                                      | 230   | 4E-32   |
|                       |                 |                     |                          |                     | >gb AAF00144.1  predicted protein [Oryza sativa]                                                                                                                                                                                                                                                                                                                                                                                                                                            | 98    | 1E-19   |
| BM334092              | 8.06E-04        | Mo17<F1<B73         | 1.56                     | 10                  | >dbj BAD69005.1  putative DsPTP1 protein [Oryza sativa (japonica cultivar-group)]                                                                                                                                                                                                                                                                                                                                                                                                           | 199   | 1E-45   |
|                       |                 |                     |                          |                     | >ref NP_914134.1  OJ1460 H08.3 [Oryza sativa (japonica cultivar-group)]                                                                                                                                                                                                                                                                                                                                                                                                                     | 196   | 1E-45   |
|                       |                 |                     |                          |                     | >gb ABA02563.1  dual-specificity protein-like phosphatase 2 [Zea mays]                                                                                                                                                                                                                                                                                                                                                                                                                      | 170   | 2E-39   |
|                       |                 |                     |                          |                     | >dbj BAE44441.1  dual specificity protein tyrosine phosphatase 1 [Solanum tuberosum]                                                                                                                                                                                                                                                                                                                                                                                                        | 179   | 3E-25   |
|                       |                 |                     |                          |                     | >ref NP_189003.1  phosphoprotein phosphatase/ protein tyrosine/serine/threoninephosphatase [Arabidopsis thaliana] emb CAA77232.1  DsPTP1 protein [Arabidopsis thaliana]                                                                                                                                                                                                                                                                                                                     | 198   | 7E-25   |
| CD058547              | 8.07E-04        | Mo17<F1<B73         | 1.28                     | 9                   | >gb ABA95929.1  CBS domain, putative [Oryza sativa (japonica cultivar-group)]                                                                                                                                                                                                                                                                                                                                                                                                               | 542   | 2E-66   |
|                       |                 |                     |                          |                     | >gb AAX93000.1  CBS domain, putative [Oryza sativa (japonica cultivar-group)]gb ABA91621.1  CBS domain, putative [Oryza sativa (japonica cultivar-group)]                                                                                                                                                                                                                                                                                                                                   | 575   | 1E-61   |
|                       |                 |                     |                          |                     | >ref NP_190863.3  unknown protein [Arabidopsis thaliana]emb CAB86899.1  putative protein [Arabidopsis thaliana]                                                                                                                                                                                                                                                                                                                                                                             | 556   | 2E-57   |
|                       |                 |                     |                          |                     | >gb AAN15439.1  putative protein [Arabidopsis thaliana]gb AAM91587.1  putative protein [Arabidopsis thaliana]                                                                                                                                                                                                                                                                                                                                                                               | 469   | 2E-57   |
|                       |                 |                     |                          |                     | >ref XP_463645.1  P0592G05.9 [Oryza sativa (japonica cultivar-group)]                                                                                                                                                                                                                                                                                                                                                                                                                       | 553   | 5E-52   |
| DV621151              | 8.16E-04        | B73<F1=Mo17         | 1.35                     | 3                   | >gb AAX96124.1  adenylate kinase b (ec 2.7.4.3) (atp-amp transphosphorylase) [Oryzasativa (japonica cultivar-group)] gb ABA92960.1  adenylate kinase b [Oryza sativa (japonica cultivar-group)] sp Q08480 KAD2_ORYSA Adenylate kinase B (ATP-AMP transphosphorylase) dbj BAA01181.1  adenylate kinase-b [Oryza sativa]                                                                                                                                                                      | 243   | 6E-84   |
|                       |                 |                     |                          |                     | >gb ABA96905.1  adenylate kinase a [Oryza sativa (japonica cultivar-group)]sp Q08479 KAD1_ORYSA Adenylate kinase A (ATP-AMP transphosphorylase) dbj BAA01180.1  adenylate kinase-a [Oryza sativa]                                                                                                                                                                                                                                                                                           | 241   | 3E-82   |
|                       |                 |                     |                          |                     | >ref NP_201145.1  ADK1 (ADENYLATE KINASE 1); ATP binding / adenylate kinase/nucleotide kinase/ phosphotransferase, phosphate group as acceptor [Arabidopsis thaliana] gb AAL85071.1  putative adenylate kinase [Arabidopsis thaliana] gb AAK64049.1  putative adenylate kinase [Arabidopsis thaliana] gb AAM61739.1  adenylate kinase [Arabidopsis thaliana] dbj BAB08805.1  adenylate kinase [Arabidopsis thaliana] sp O82514 KAD1_ARATH Adenylate kinase 1 (ATP-AMP transphosphorylase 1) | 246   | 2E-77   |
|                       |                 |                     |                          |                     | >gb AAM63345.1  adenylate kinase [Arabidopsis thaliana]                                                                                                                                                                                                                                                                                                                                                                                                                                     | 248   | 3E-77   |
|                       |                 |                     |                          |                     | >ref NP_199848.1  ATP binding / adenylate kinase/ nucleotide kinase/phosphotransferase, phosphate group as acceptor [Arabidopsis thaliana] gb AAO44077.1  At5g50370 [Arabidopsis thaliana] dbj BAB09456.1  adenylate kinase [Arabidopsis thaliana] sp Q9FK35 KAD2_ARATH Adenylate kinase 2 (ATP-AMP transphosphorylase 2)                                                                                                                                                                   | 248   | 3E-76   |
|                       |                 |                     |                          |                     | >ref XP_469784.1  putative potassium channel protein [Oryza sativa (japonica cultivar-group)] gb AAO32309.1  putative outward rectifying potassium channel [Oryza sativa (japonica cultivar-group)] gb AAR87255.1  putative potassium channel protein [Oryza sativa (japonica cultivar-group)] gb AAP68365.1  putative potassium channel protein [Oryza sativa (japonica cultivar-group)]                                                                                                   | 347   | 8E-45   |
|                       |                 |                     |                          |                     | >gb AAX08090.1  outward-rectifying potassium channel [Hordeum vulgare subsp.vulgare]                                                                                                                                                                                                                                                                                                                                                                                                        | 349   | 1E-42   |
|                       |                 |                     |                          |                     | >gb AAD16279.1  pulvinus outward-rectifying channel for potassium SPOCK1 [Samanea saman]                                                                                                                                                                                                                                                                                                                                                                                                    | 352   | 1E-25   |
|                       |                 |                     |                          |                     | >ref XP_476391.1  putative outward-rectifying potassium channel KCO1 [Oryza sativa(japonica cultivar-group)] dbj BAD30634.1  putative outward-rectifying potassium channel KCO1 [Oryza sativa (japonica cultivar-group)] dbj BAC06932.1  putative outward-rectifying potassium channel KCO1 [Oryza sativa (japonica cultivar-group)]                                                                                                                                                        | 349   | 4E-25   |
|                       |                 |                     |                          |                     | >gb AAF97863.1  outward-rectifying potassium channel KCO1 [Eucalyptuscamaldulensis] gb AAF97727.1  Eucalyptus camaldulensis outward-rectifying potassium channel mRNA, complete cds                                                                                                                                                                                                                                                                                                         | 348   | 2E-23   |
| BM350368              | 8.24E-04        | F1=Mo17<B73         | 1.44                     | 9                   | >gb AAU90205.1  unknown protein [Oryza sativa (japonica cultivar-group)]                                                                                                                                                                                                                                                                                                                                                                                                                    | 144   | 1E-34   |
|                       |                 |                     |                          |                     | >dbj BAD82673.1  unknown protein [Oryza sativa (japonica cultivar-group)]                                                                                                                                                                                                                                                                                                                                                                                                                   | 156   | 3E-10   |
|                       |                 |                     |                          |                     | >ref NP_915497.1  P0005H10.22 [Oryza sativa (japonica cultivar-group)]                                                                                                                                                                                                                                                                                                                                                                                                                      | 272   | 3E-10   |
|                       |                 |                     |                          |                     | >ref NP_001030865.1  unknown protein [Arabidopsis thaliana]                                                                                                                                                                                                                                                                                                                                                                                                                                 | 146   | 4E-8    |
|                       |                 |                     |                          |                     | >ref NP_921803.1  putative PGPD14 protein (pollen germination related protein) [Oryzasativa (japonica cultivar-group)] gb AAP54090.1  CHY zinc finger, putative [Oryza sativa (japonica cultivar-group)]                                                                                                                                                                                                                                                                                    | 266   | 3E-44   |
| BM072886              | 8.41E-04        | Mo17<B73=F1         | 1.42                     | 10                  | >gb ABB47748.1  CHY zinc finger, putative [Oryza sativa (japonica cultivar-group)]                                                                                                                                                                                                                                                                                                                                                                                                          | 222   | 3E-44   |
|                       |                 |                     |                          |                     | >gb AAD02556.1  PGPD14 [Petunia x hybrida]                                                                                                                                                                                                                                                                                                                                                                                                                                                  | 285   | 4E-36   |
|                       |                 |                     |                          |                     | >gb AAM65683.1  PGPD14 protein [Arabidopsis thaliana]                                                                                                                                                                                                                                                                                                                                                                                                                                       | 274   | 2E-34   |
|                       |                 |                     |                          |                     | >ref NP_197683.1  ubiquitin-protein ligase/ zinc ion binding [Arabidopsis thaliana]gb AAK96553.1  AT5g22920/MRN17_15 [Arabidopsis thaliana] gb AAY57617.1  RING finger family protein [Arabidopsis thaliana] dbj BAB10613.1  PGPD14 protein [Arabidopsis thaliana] gb AAO11551.1  At5g22920/MRN17_15 [Arabidopsis thaliana]                                                                                                                                                                 | 291   | 3E-34   |
|                       |                 |                     |                          |                     | >ref NP_922208.1  putative folylpolyglutamate synthetase [Oryza sativa (japonica cultivar-group)] gb AAG13624.1  putative folylpolyglutamate synthetase [Oryza sativa (japonica cultivar-group)]                                                                                                                                                                                                                                                                                            | 546   | 2E-29   |

**Table 4. Microarray analysis results, mode of gene action classification, and BLAST annotation for the 1,367 ESTs identified as differentially expressed among genotypes (15% FDR)**

| GenBank accession no. | Overall P value | Significant pattern | Fold change <sup>†</sup> | Sector <sup>‡</sup> | BLAST annotation*                                                                                                                                                                                                                                                                                                                                                                                                                                                                                           | Score | E value |
|-----------------------|-----------------|---------------------|--------------------------|---------------------|-------------------------------------------------------------------------------------------------------------------------------------------------------------------------------------------------------------------------------------------------------------------------------------------------------------------------------------------------------------------------------------------------------------------------------------------------------------------------------------------------------------|-------|---------|
|                       |                 |                     |                          |                     | >ref NP_196217.2  ATDFB (A. THALIANA DHFS-FPGS HOMOLOG B);tetrahydrofolylpolyglutamate synthase [Arabidopsis thaliana]                                                                                                                                                                                                                                                                                                                                                                                      | 571   | 1E-27   |
|                       |                 |                     |                          |                     | >ref NP_001031840.1  ATDFB (A. THALIANA DHFS-FPGS HOMOLOG B);tetrahydrofolylpolyglutamate synthase [Arabidopsis thaliana]                                                                                                                                                                                                                                                                                                                                                                                   | 513   | 1E-27   |
|                       |                 |                     |                          |                     | >emb CAC80839.2  dihydrofolate synthetase /folylpolyglutamate synthetase[Arabidopsis thaliana]                                                                                                                                                                                                                                                                                                                                                                                                              | 571   | 2E-27   |
|                       |                 |                     |                          |                     | >ref NP_567026.3  ATDFD (A. THALIANA DHFS-FPGS HOMOLOG D);tetrahydrofolylpolyglutamate synthase [Arabidopsis thaliana] emb CAC82079.1  folylpolyglutamate-dihydrofolate synthetase [Arabidopsis thaliana]                                                                                                                                                                                                                                                                                                   | 492   | 3E-25   |
| CB381724              | 8.52E-04        | Mo17<B73=F1         | 1.72                     | 10                  | >ref XP_473874.1  OSJNBa0070C17.22 [Oryza sativa (japonica cultivar-group)]emb CAE05215.3  OSJNBa0070C17.22 [Oryza sativa (japonica cultivar-group)]                                                                                                                                                                                                                                                                                                                                                        | 438   | 5E-10   |
| DV549332              | 8.56E-04        | B73<F1=Mo17         | 1.45                     | 3                   | ns                                                                                                                                                                                                                                                                                                                                                                                                                                                                                                          |       |         |
| BM073332              | 8.59E-04        | Mo17<B73=F1         | 4.38                     | 10                  | ns                                                                                                                                                                                                                                                                                                                                                                                                                                                                                                          |       |         |
| CD650951              | 8.61E-04        | F1=Mo17<B73         | 1.32                     | 9                   | >ref NP_921998.1  hypothetical protein [Oryza sativa (japonica cultivar-group)]gb AAG13576.1  hypothetical protein [Oryza sativa] gb AAP54285.1  hypothetical protein LOC_Os10g33820 [Oryza sativa (japonica cultivar-group)]                                                                                                                                                                                                                                                                               | 460   | 1E-46   |
|                       |                 |                     |                          |                     | >ref NP_850276.1  unknown protein [Arabidopsis thaliana]                                                                                                                                                                                                                                                                                                                                                                                                                                                    | 433   | 2E-7    |
| CD527239              | 8.83E-04        | Mo17<B73=F1         | 1.32                     | 10                  | >ref NP_910779.1  putative NADH dehydrogenase [Oryza sativa (japonica cultivar-group)] ref XP_506513.1  PREDICTED P0503D09.102 gene product [Oryza sativa (japonica cultivar-group)] dbj BAC16718.1  putative NADH dehydrogenase [Oryza sativa (japonica cultivar-group)]                                                                                                                                                                                                                                   | 504   | 4E-9    |
|                       |                 |                     |                          |                     | >ref NP_915675.1  putative protein kinase SPK-3 [Oryza sativa (japonica cultivar-group)] dbj BAB89813.1  serine/threonine protein kinase SAPK4 [Oryza sativa (japonica cultivar-group)] dbj BAB64101.1  serine/threonine protein kinase SAPK4 [Oryza sativa (japonica cultivar-group)] dbj BAD18000.1  serine/threonine protein kinase SAPK4 [Oryza sativa (japonica cultivar-group)] sp Q5N942 SAPK4_ORYSA Serine/threonine-protein kinase SAPK4 (Osmotic stress/abscisic acid-activated protein kinase 4) | 360   | 1E-48   |
| DV490806              | 8.84E-04        | B73<F1<Mo17         | 1.48                     | 4                   | >dbj BAD82014.1  serine/threonine protein kinase SAPK4-like protein [Oryza sativa(japonica cultivar-group)] dbj BAD81709.1  serine/threonine protein kinase SAPK4-like protein [Oryza sativa (japonica cultivar-group)]                                                                                                                                                                                                                                                                                     | 168   | 1E-48   |
|                       |                 |                     |                          |                     | >ref XP_472550.1  OSJNBa0084A10.11 [Oryza sativa (japonica cultivar-group)]dbj BAD18003.1  serine/threonine protein kinase SAPK7 [Oryza sativa (japonica cultivar-group)] sp Q7XQP4 SAPK7 ORYSA Serine/threonine-protein kinase SAPK7 (Osmotic stress/abscisic acid-activated protein kinase 7)                                                                                                                                                                                                             | 359   | 7E-37   |
|                       |                 |                     |                          |                     | >emb CAE03037.3  OSJNBa0084A10.12 [Oryza sativa (japonica cultivar-group)]                                                                                                                                                                                                                                                                                                                                                                                                                                  | 407   | 7E-37   |
|                       |                 |                     |                          |                     | >gb AAU43772.1  putative salt-inducible protein kinase [Zea mays]                                                                                                                                                                                                                                                                                                                                                                                                                                           | 364   | 3E-36   |
| CD058870              | 9.04E-04        | B73=F1<Mo17         | 1.39                     | 4                   | >ref XP_479103.1  putative transcription factor [Oryza sativa (japonica cultivar-group)] dbj BAC84851.1  putative transcription factor [Oryza sativa (japonica cultivar-group)]                                                                                                                                                                                                                                                                                                                             | 297   | 1E-8    |
|                       |                 |                     |                          |                     | >ref XP_468386.1  diphthamide synthesis DPH2-like [Oryza sativa (japonica cultivar-group)] ref XP_507043.1  PREDICTED OJ1293_E04.32 gene product [Oryza sativa (japonica cultivar-group)] dbj BAD22000.1  diphthamide synthesis DPH2-like [Oryza sativa (japonica cultivar-group)] dbj BAD21677.1  diphthamide synthesis DPH2-like [Oryza sativa (japonica cultivar-group)]                                                                                                                                 | 474   | 5E-46   |
| DV493904              | 9.11E-04        | B73<F1=Mo17         | 1.55                     | 3                   | >ref NP_201009.1  unknown protein [Arabidopsis thaliana]gb AAM51395.1  unknown protein [Arabidopsis thaliana] gb AAM13884.1  unknown protein [Arabidopsis thaliana]                                                                                                                                                                                                                                                                                                                                         | 453   | 4E-22   |
|                       |                 |                     |                          |                     | >dbj BAB10164.1  unnamed protein product [Arabidopsis thaliana]                                                                                                                                                                                                                                                                                                                                                                                                                                             | 468   | 4E-22   |
|                       |                 |                     |                          |                     | >ref NP_001025887.1  DPH1 homolog [Gallus gallus]emb CAG32664.1  hypothetical protein [Gallus gallus]                                                                                                                                                                                                                                                                                                                                                                                                       | 409   | 4E-13   |
|                       |                 |                     |                          |                     | >ref XP_759185.1  hypothetical protein UM03038.1 [Ustilago maydis 521]gb EAK84039.1  hypothetical protein UM03038.1 [Ustilago maydis 521] sp Q4PA25 DPH1 USTMA Diphthamide biosynthesis protein 1                                                                                                                                                                                                                                                                                                           | 609   | 1E-10   |
| CB351542              | 9.27E-04        | B73<F1=Mo17         | 1.58                     | 3                   | >dbj BAB11155.1  unnamed protein product [Arabidopsis thaliana]                                                                                                                                                                                                                                                                                                                                                                                                                                             | 1105  | 2E-28   |
|                       |                 |                     |                          |                     | >ref NP_196314.2  unknown protein [Arabidopsis thaliana]gb AAL91294.1  At5g06970/MOJ9_14 [Arabidopsis thaliana] gb AAO11640.1  At5g06970/MOJ9_14 [Arabidopsis thaliana]                                                                                                                                                                                                                                                                                                                                     | 1101  | 2E-28   |
|                       |                 |                     |                          |                     | >ref XP_469322.1  unknown protein [Oryza sativa (japonica cultivar-group)]gb AAP68377.1  unknown protein [Oryza sativa (japonica cultivar-group)]                                                                                                                                                                                                                                                                                                                                                           | 1078  | 8E-28   |
|                       |                 |                     |                          |                     | >gb AAK14418.1  unknown protein [Oryza sativa]                                                                                                                                                                                                                                                                                                                                                                                                                                                              | 1049  | 8E-28   |
|                       |                 |                     |                          |                     | >ref NP_192904.2  unknown protein [Arabidopsis thaliana]                                                                                                                                                                                                                                                                                                                                                                                                                                                    | 985   | 2E-8    |
| DV621059              | 9.30E-04        | B73<F1=Mo17         | 1.56                     | 3                   | >gb ABA95760.1  expressed protein [Oryza sativa (japonica cultivar-group)]                                                                                                                                                                                                                                                                                                                                                                                                                                  | 292   | 2E-59   |
|                       |                 |                     |                          |                     | >gb ABA91405.1  expressed protein [Oryza sativa (japonica cultivar-group)]                                                                                                                                                                                                                                                                                                                                                                                                                                  | 308   | 6E-59   |
|                       |                 |                     |                          |                     | >ref NP_196037.2  calcium ion binding [Arabidopsis thaliana]emb CAC05499.1  EF-hand Calcium binding protein-like [Arabidopsis thaliana] gb AAP68277.1  At5g04170 [Arabidopsis thaliana] gb AAL91231.1  EF-hand calcium binding protein-like [Arabidopsis thaliana]                                                                                                                                                                                                                                          | 354   | 1E-54   |
|                       |                 |                     |                          |                     | >ref NP_187641.2  calcium ion binding [Arabidopsis thaliana]gb AAT85768.1  At3g10300 [Arabidopsis thaliana] gb AAL32576.1  Unknown protein [Arabidopsis thaliana]                                                                                                                                                                                                                                                                                                                                           | 335   | 2E-53   |
|                       |                 |                     |                          |                     | >emb CAB63845.1  putative cysteine protease [Pisum sativum]                                                                                                                                                                                                                                                                                                                                                                                                                                                 | 286   | 5E-43   |
| CB885897              | 9.38E-04        | Mo17<B73=F1         | 1.29                     | 10                  | >emb CAA29928.1  unnamed protein product [Zea mays]sp P12653 GSTF1 MAIZE Glutathione S-transferase I (GST-I) (GST-29) (GST class-phi)                                                                                                                                                                                                                                                                                                                                                                       | 214   | 4E-84   |
|                       |                 |                     |                          |                     | >gb AAA72758.1  glutathione S-transferase                                                                                                                                                                                                                                                                                                                                                                                                                                                                   | 214   | 4E-84   |
|                       |                 |                     |                          |                     | >pdb 1BYE D Chain D, Glutathione S-Transferase I From Mais In Complex With Atrazine Glutathione Conjugate pdb 1BYE C Chain C, Glutathione S-Transferase I From Mais In Complex With Atrazine Glutathione Conjugate pdb 1BYE B Chain B, Glutathione S-Transferase I From Mais In Complex With Atrazine Glutathione Conjugate pdb 1BYE A Chain A, Glutathione S-Transferase I From Mais In Complex With Atrazine Glutathione Conjugate                                                                        | 213   | 4E-84   |
|                       |                 |                     |                          |                     | >gb AAA33470.1  glutathione S-transferase Igb AAA33469.1  glutathione S-transferase I prf 1303351A transferase,glutathione S                                                                                                                                                                                                                                                                                                                                                                                | 214   | 2E-83   |

**Table 4. Microarray analysis results, mode of gene action classification, and BLAST annotation for the 1,367 ESTs identified as differentially expressed among genotypes (15% FDR)**

| GenBank accession no. | Overall P value | Significant pattern | Fold change <sup>†</sup> | Sector <sup>‡</sup> | BLAST annotation*                                                                                                                                                                                                                                                                                                                                   | Score | E value |
|-----------------------|-----------------|---------------------|--------------------------|---------------------|-----------------------------------------------------------------------------------------------------------------------------------------------------------------------------------------------------------------------------------------------------------------------------------------------------------------------------------------------------|-------|---------|
|                       |                 |                     |                          |                     | >pdb 1AXD B Chain B, Structure Of Glutathione S-Transferase-I Bound With TheLigand Lactoylglutathione pdb 1AXD A Chain A, Structure Of Glutathione S-Transferase-I Bound With The Ligand Lactoylglutathione                                                                                                                                         | 209   | 9E-82   |
| BM079296              | 9.38E-04        | Mo17<B73=F1         | 1.78                     | 10                  | >gb AAU94637.1  SNARE 13 [Oryza sativa (japonica cultivar-group)]<br>>ref XP_479265.1  vesicle soluble NSF attachment protein receptor-like protein [Oryzasativa (japonica cultivar-group)] dbj BAC16405.1  vesicle soluble NSF attachment protein receptor-like protein [Oryza sativa (japonica cultivar-group)]                                   | 266   | 2E-37   |
|                       |                 |                     |                          |                     | >gb AAU94636.1  SNARE 12 [Oryza sativa (japonica cultivar-group)]<br>>ref NP_909819.1  putative vesicle soluble NSF attachment protein receptor [Oryzasativa] gb AAG46143.1  putative vesicle soluble NSF attachment protein receptor [Oryza sativa]                                                                                                | 275   | 8E-34   |
|                       |                 |                     |                          |                     | >ref NP_175258.2  ATNPSN12; protein transporter [Arabidopsis thaliana]gb AAL92119.1  NPSN12 [Arabidopsis thaliana] gb AAO63335.1  At1g48240 [Arabidopsis thaliana] dbj BAC41993.1  unknown protein [Arabidopsis thaliana] gb AAF79516.1  F21D18.4 [Arabidopsis thaliana] sp Q9LNH6 NPS12_ARATH Novel plant SNARE 12 (AtNPSN12)                      | 275   | 8E-34   |
| DV622391              | 9.46E-04        | B73<F1<Mo17         | 1.28                     | 3                   | >dbj BAD72326.1  unknown protein [Oryza sativa (japonica cultivar-group)]<br>>dbj BAD72325.1  eukaryotic translation initiation factor 3 subunit 10-like [Oryzasativa (japonica cultivar-group)]                                                                                                                                                    | 568   | 4E-25   |
| DV549774              | 9.47E-04        | B73=F1<Mo17         | 1.97                     | 4                   | >ref XP_472585.1  OSJNBa0006B20.8 [Oryza sativa (japonica cultivar-group)]emb CAD40816.2  OSJNBa0006B20.8 [Oryza sativa (japonica cultivar-group)]<br>>ref NP_189286.1  unknown protein [Arabidopsis thaliana]dbj BAB01836.1  selenium-binding protein-like [Arabidopsis thaliana]                                                                  | 717   | 4E-9    |
| CD058617              | 9.60E-04        | B73<F1=Mo17         | 1.39                     | 2                   | >emb CAA55022.1  beta tubulin [Oryza sativa (japonica cultivar-group)]<br>>emb CAE52516.1  beta tubulin [Setaria viridis]                                                                                                                                                                                                                           | 447   | 3E-70   |
|                       |                 |                     |                          |                     | >ref NP_915874.1  tubulin beta chain [Oryza sativa (japonica cultivar-group)]dbj BAB92274.1  beta-tubulin [Oryza sativa (japonica cultivar-group)]<br>dbj BAA06381.1  beta-tubulin [Oryza sativa (japonica cultivar-group)] sp P45960 TBB4 ORYSA Tubulin beta-4 chain (Beta-4 tubulin)                                                              | 448   | 3E-70   |
|                       |                 |                     |                          |                     | >gb AAA66495.1  beta-tubulin<br>>sp Q41783 TBB6 MAIZE Tubulin beta-6 chain (Beta-6 tubulin)gb AAA20186.1  beta-6 tubulin                                                                                                                                                                                                                            | 447   | 3E-70   |
| DV489510              | 9.61E-04        | F1=Mo17<B73         | 1.65                     | 8                   | ns                                                                                                                                                                                                                                                                                                                                                  | 446   | 3E-70   |
| DV491117              | 9.73E-04        | B73<F1=Mo17         | 1.54                     | 3                   | >ref NP_915015.1  putative SnRK1-interacting protein 1 [Oryza sativa (japonica cultivar-group)] dbj BAB92460.1  putative SnRK1-interacting protein 1 [Oryza sativa (japonica cultivar-group)]<br>>emb CAB97356.1  SnRK1-interacting protein 1 [Hordeum vulgare subsp. vulgare]                                                                      | 188   | 9E-35   |
|                       |                 |                     |                          |                     | >ref NP_849876.1  unknown protein [Arabidopsis thaliana]ref NP_177287.1  unknown protein [Arabidopsis thaliana] gb AAN15699.1  unknown protein [Arabidopsis thaliana] gb AAM91575.1  unknown protein [Arabidopsis thaliana] gb AAG51886.1  hypothetical protein; 63020-64147 [Arabidopsis thaliana]                                                 | 188   | 2E-33   |
|                       |                 |                     |                          |                     | >dbj BAD34413.1  hypothetical protein [Oryza sativa (japonica cultivar-group)]<br>>ref NP_199598.1  unknown protein [Arabidopsis thaliana]dbj BAD43427.1  unknown protein [Arabidopsis thaliana] dbj BAB11334.1  unnamed protein product [Arabidopsis thaliana]                                                                                     | 176   | 3E-29   |
| DV490357              | 9.73E-04        | B73<F1=Mo17         | 10.26                    | 3                   | >ref XP_478231.1  ribosomal protein-like [Oryza sativa (japonica cultivar-group)]dbj BAD31045.1  ribosomal protein-like [Oryza sativa (japonica cultivar-group)]<br>>gb ABA96831.1  transposon protein, putative, ping/pong/SNOOPY sub-class [Oryzasativa (japonica cultivar-group)]                                                                | 258   | 6E-39   |
|                       |                 |                     |                          |                     | >gb ABA95927.1  transposon protein, putative, ping/pong/SNOOPY sub-class [Oryzasativa (japonica cultivar-group)]<br>>gb AAQ56372.1  hypothetical protein OSJNBa0017M13.23 [Oryza sativa (japonica cultivar-group)]                                                                                                                                  | 511   | 1E-38   |
|                       |                 |                     |                          |                     | >ref XP_481524.1  hypothetical protein [Oryza sativa (japonica cultivar-group)]                                                                                                                                                                                                                                                                     | 450   | 1E-38   |
| DV490980              | 9.82E-04        | B73<F1<Mo17         | 4.56                     | 4                   | ns                                                                                                                                                                                                                                                                                                                                                  | 291   | 2E-37   |
| DV494865              | 9.83E-04        | Mo17<B73=F1         | 1.9                      | 10                  | >gb AAL76334.1  putative G-box binding protein [Oryza sativa]dbj BAD45657.1  G-box binding protein-like [Oryza sativa (japonica cultivar-group)]<br>gb AAB65433.1  HvB12D homolog [Oryza sativa]                                                                                                                                                    | 89    | 3E-40   |
|                       |                 |                     |                          |                     | >emb CAA70936.1  B12Dg1 [Hordeum vulgare subsp. vulgare]emb CAA54065.1  HvB12D [Hordeum vulgare subsp. vulgare]                                                                                                                                                                                                                                     | 87    | 4E-37   |
|                       |                 |                     |                          |                     | >gb AAD22104.1  B12D protein [Ipomoea batatas]<br>>ref NP_190397.1  unknown protein [Arabidopsis thaliana]emb CAB51061.1  B12D-like protein [Arabidopsis thaliana] gb AAL91215.1  B12D-like protein [Arabidopsis thaliana] gb AAN65070.1  B12D-like protein [Arabidopsis thaliana] pir T13003 hypothetical protein T24C20.20 - Arabidopsis thaliana | 90    | 1E-33   |
|                       |                 |                     |                          |                     | >ref XP_477421.1  putative B12D protein [Oryza sativa (japonica cultivar-group)]dbj BAC84633.1  putative B12D protein [Oryza sativa (japonica cultivar-group)]<br>dbj BAD31625.1  putative B12D protein [Oryza sativa (japonica cultivar-group)]                                                                                                    | 88    | 4E-30   |
| CAB29967              | 9.92E-04        | Mo17<F1<B73         | 2.29                     | 10                  | >ref NP_921503.1  putative polyprotein [Oryza sativa (japonica cultivar-group)]<br>>gb ABB47623.1  oxidoreductase, aldo/keto reductase family [Oryza sativa (japonicacultivar-group)]                                                                                                                                                               | 434   | 5E-74   |
|                       |                 |                     |                          |                     | >gb AAT08681.1  aldo/keto reductase [Hyacinthus orientalis]<br>>dbj BAD61512.1  putative auxin-induced protein [Oryza sativa (japonicacultivar-group)]                                                                                                                                                                                              | 343   | 5E-74   |
|                       |                 |                     |                          |                     | >gb AAX11684.1  perakine reductase [Rauvolfia serpentina]                                                                                                                                                                                                                                                                                           | 209   | 4E-64   |
| CB331024              | 9.95E-04        | B73<F1<Mo17         | 1.56                     | 4                   | >gb AAR91093.1  hypothetical protein [Zea mays]<br>>gb AAR91173.1  hypothetical protein [Zea mays]<br>>gb AAR91168.1  hypothetical protein [Zea mays]                                                                                                                                                                                               | 344   | 4E-60   |
| CD484865              | 9.96E-04        | B73<F1=Mo17         | 1.41                     | 3                   | >gb AAO43185.1  S-adenosylmethionine decarboxylase leader [Narcissuspseudonarcissus]                                                                                                                                                                                                                                                                | 337   | 7E-58   |
|                       |                 |                     |                          |                     |                                                                                                                                                                                                                                                                                                                                                     | 140   | 4E-62   |
|                       |                 |                     |                          |                     |                                                                                                                                                                                                                                                                                                                                                     | 101   | 8E-26   |
|                       |                 |                     |                          |                     |                                                                                                                                                                                                                                                                                                                                                     | 105   | 4E-13   |
|                       |                 |                     |                          |                     |                                                                                                                                                                                                                                                                                                                                                     | 51    | 2E-11   |

**Table 4. Microarray analysis results, mode of gene action classification, and BLAST annotation for the 1,367 ESTs identified as differentially expressed among genotypes (15% FDR)**

| GenBank accession no. | Overall P value | Significant pattern | Fold change <sup>‡</sup> | Sector <sup>‡</sup> | BLAST annotation*                                                                                                                                                                                                                                                                                                                                                                                                                                                                                                                                                                                                                            | Score | E value |
|-----------------------|-----------------|---------------------|--------------------------|---------------------|----------------------------------------------------------------------------------------------------------------------------------------------------------------------------------------------------------------------------------------------------------------------------------------------------------------------------------------------------------------------------------------------------------------------------------------------------------------------------------------------------------------------------------------------------------------------------------------------------------------------------------------------|-------|---------|
|                       |                 |                     |                          |                     | >emb CAD41510.3  OSJNBa0029H02.4 [Oryza sativa (japonica cultivar-group)]                                                                                                                                                                                                                                                                                                                                                                                                                                                                                                                                                                    | 450   | 2E-11   |
|                       |                 |                     |                          |                     | >gb AAR84407.1  S-adenosylmethionine decarboxylase uORF [Daucus carota]                                                                                                                                                                                                                                                                                                                                                                                                                                                                                                                                                                      | 53    | 6E-11   |
|                       |                 |                     |                          |                     | >gb AAC48988.1  putative                                                                                                                                                                                                                                                                                                                                                                                                                                                                                                                                                                                                                     | 51    | 6E-11   |
|                       |                 |                     |                          |                     | >gb AAB03864.1  putative ORF; conserved in 5' leaders of plant SAMdC [Pisumsativum]                                                                                                                                                                                                                                                                                                                                                                                                                                                                                                                                                          | 54    | 7E-11   |
| BM073917              | 9.97E-04        | Mo17<B73=F1         | 1.5                      | 10                  | ns                                                                                                                                                                                                                                                                                                                                                                                                                                                                                                                                                                                                                                           |       |         |
| DV491701              | 1.00E-03        | Mo17<B73=F1         | 1.43                     | 10                  | >gb ABA98275.1  ribosomal protein L4/L1 family, putative [Oryza sativa (japonica cultivar-group)]                                                                                                                                                                                                                                                                                                                                                                                                                                                                                                                                            | 288   | 1E-19   |
|                       |                 |                     |                          |                     | >gb ABA94446.1  ribosomal protein L4/L1 family, putative [Oryza sativa (japonica cultivar-group)]                                                                                                                                                                                                                                                                                                                                                                                                                                                                                                                                            | 286   | 4E-19   |
|                       |                 |                     |                          |                     | >gb AAM62769.1  50S ribosomal protein L4 [Arabidopsis thaliana]                                                                                                                                                                                                                                                                                                                                                                                                                                                                                                                                                                              | 300   | 1E-17   |
|                       |                 |                     |                          |                     | >ref NP_565463.1  structural constituent of ribosome [Arabidopsis thaliana]gb AAD24390.2  50S ribosomal protein L4 [Arabidopsis thaliana] gb AAL62411.1  50S ribosomal protein L4 [Arabidopsis thaliana] gb AAN72167.1  50S ribosomal protein L4 [Arabidopsis thaliana]                                                                                                                                                                                                                                                                                                                                                                      | 300   | 3E-17   |
|                       |                 |                     |                          |                     | >gb AAL28955.1  LD33485p [Drosophila melanogaster]ref NP_524939.1  CG5818-PA [Drosophila melanogaster] gb AAF53526.1  CG5818-PA [Drosophila melanogaster]                                                                                                                                                                                                                                                                                                                                                                                                                                                                                    | 296   | 8E-7    |
| DV490619              | 1.00E-03        | Mo17<B73=F1         | 2.16                     | 10                  | >ref XP_463160.1  putative protein kinase [Oryza sativa (japonica cultivar-group)]gb AAR00606.1  putative protein kinase [Oryza sativa (japonica cultivar-group)] dbj BAD18006.2  serine/threonine protein kinase SAPK10 [Oryza sativa (japonica cultivar-group)] sp Q75H77 SAPKA_ORYSA Serine/threonine-protein kinase SAPK10 (Osmotic stress/abscisic acid-activated protein kinase 10)                                                                                                                                                                                                                                                    | 362   | 3E-26   |
|                       |                 |                     |                          |                     | >dbj BAD18005.1  serine/threonine protein kinase SAPK9 [Oryza sativa (japonica cultivar-group)] sp Q75V57 SAPK9_ORYSA Serine/threonine-protein kinase SAPK9 (Osmotic stress/abscisic acid-activated protein kinase 9) gb ABA99733.1  protein kinase-like protein [Oryza sativa (japonica cultivar-group)]                                                                                                                                                                                                                                                                                                                                    | 361   | 1E-24   |
|                       |                 |                     |                          |                     | >ref XP_469888.1  putative serine-threonine protein kinase [Oryza sativa (japonica cultivar-group)] gb AAP50965.1  putative serine-threonine protein kinase [Oryza sativa (japonica cultivar-group)] dbj BAD18004.1  serine/threonine protein kinase SAPK8 [Oryza sativa (japonica cultivar-group)] sp Q7Y0B9 SAPK8_ORYSA Serine/threonine-protein kinase SAPK8 (Osmotic stress/abscisic acid-activated protein kinase 8)                                                                                                                                                                                                                    | 371   | 3E-19   |
|                       |                 |                     |                          |                     | >emb CAB80112.1  protein kinase-like protein [Arabidopsis thaliana]emb CAA19877.1  protein kinase-like protein [Arabidopsis thaliana]                                                                                                                                                                                                                                                                                                                                                                                                                                                                                                        | 357   | 3E-18   |
|                       |                 |                     |                          |                     | >ref NP_567945.1  OST1 (OPEN STOMATA 1); kinase/ protein kinase [Arabidopsisthaliana] emb CAC87047.1  protein kinase [Arabidopsis thaliana] gb AAM10100.1  protein kinase-like protein [Arabidopsis thaliana] gb AAK96815.1  protein kinase - like protein [Arabidopsis thaliana]                                                                                                                                                                                                                                                                                                                                                            | 362   | 3E-18   |
| BM336405              | 1.02E-03        | Mo17<B73=F1         | 1.35                     | 10                  | >ref XP_467453.1  putative diphosphate-fructose-6-phosphate 1-phosphotransferasealpha chain [Oryza sativa (japonica cultivar-group)] dbj BAD07793.1  putative diphosphate-fructose-6-phosphate 1-phosphotransferase alpha chain [Oryza sativa (japonica cultivar-group)]                                                                                                                                                                                                                                                                                                                                                                     | 617   | 7E-37   |
|                       |                 |                     |                          |                     | >dbj BAD33246.1  putative Pyrophosphate--fructose 6-phosphate 1-phosphotransferasealpha subunit [Oryza sativa (japonica cultivar-group)]                                                                                                                                                                                                                                                                                                                                                                                                                                                                                                     | 617   | 3E-36   |
|                       |                 |                     |                          |                     | >emb CAA83682.1  pyrophosphate-dependent phosphofructokinase alpha subunit [Ricinuscommunis] sp Q41140 PFPA_RICCO Pyrophosphate--fructose 6-phosphate 1-phosphotransferase alpha subunit (PFK) (6-phosphofructokinase, pyrophosphate dependent) (Pyrophosphate-dependent 6-phosphofructose-1-kinase) (PPI-PFK)                                                                                                                                                                                                                                                                                                                               | 617   | 2E-31   |
|                       |                 |                     |                          |                     | >dbj BAD95089.1  putative pyrophosphate-dependent phosphofructokinase alpha subunit[Arabidopsis thaliana]                                                                                                                                                                                                                                                                                                                                                                                                                                                                                                                                    | 310   | 1E-30   |
|                       |                 |                     |                          |                     | >ref NP_177781.1  6-phosphofructokinase [Arabidopsis thaliana]gb AAG51940.1  putative pyrophosphate-dependent phosphofructokinase alpha subunit; 63231-59202 [Arabidopsis thaliana]                                                                                                                                                                                                                                                                                                                                                                                                                                                          | 617   | 1E-30   |
| CB334535              | 1.02E-03        | F1=Mo17<B73         | 1.52                     | 9                   | >emb CAD29296.1  plasma membrane H+ ATPase [Oryza sativa (japonica cultivar-group)]gb ABA99607.1  plasma-membrane proton-efflux P-type ATPase [Oryza sativa (japonica cultivar-group)]                                                                                                                                                                                                                                                                                                                                                                                                                                                       | 956   | 3E-61   |
|                       |                 |                     |                          |                     | >gb AAT81733.1  H-ATPase [Oryza sativa (japonica cultivar-group)]emb CAD29294.1  plasma membrane H+ ATPase [Oryza sativa (japonica cultivar-group)]                                                                                                                                                                                                                                                                                                                                                                                                                                                                                          | 956   | 8E-61   |
|                       |                 |                     |                          |                     | >ref XP_476966.1  plasma membrane H+ ATPase [Oryza sativa (japonica cultivar-group)]emb CAD29295.1  plasma membrane H+ ATPase [Oryza sativa (japonica cultivar-group)] dbj BAC83861.1  plasma membrane H+ ATPase [Oryza sativa (japonica cultivar-group)]                                                                                                                                                                                                                                                                                                                                                                                    | 957   | 4E-60   |
|                       |                 |                     |                          |                     | >dbj BAA06629.1  plasma membrane H+-ATPase [Oryza sativa (japonica cultivar-group)]                                                                                                                                                                                                                                                                                                                                                                                                                                                                                                                                                          | 957   | 8E-60   |
|                       |                 |                     |                          |                     | >gb AAB60276.1  H(+)-transporting ATPase [Zea mays]                                                                                                                                                                                                                                                                                                                                                                                                                                                                                                                                                                                          | 949   | 2E-58   |
| CB833537              | 1.04E-03        | F1=Mo17<B73         | 1.65                     | 9                   | >emb CAC01750.1  putative protein [Arabidopsis thaliana]                                                                                                                                                                                                                                                                                                                                                                                                                                                                                                                                                                                     | 494   | 3E-14   |
|                       |                 |                     |                          |                     | >ref NP_197055.2  unknown protein [Arabidopsis thaliana]                                                                                                                                                                                                                                                                                                                                                                                                                                                                                                                                                                                     | 497   | 3E-14   |
|                       |                 |                     |                          |                     | >gb AAU44468.1  hypothetical protein AT3G01015 [Arabidopsis thaliana]gb AAY78731.1  hypothetical protein At3g01015 [Arabidopsis thaliana]                                                                                                                                                                                                                                                                                                                                                                                                                                                                                                    | 488   | 4E-13   |
|                       |                 |                     |                          |                     | >ref NP_186749.1  unknown protein [Arabidopsis thaliana]gb AAG51320.1  hypothetical protein; 557-2776 [Arabidopsis thaliana]                                                                                                                                                                                                                                                                                                                                                                                                                                                                                                                 | 488   | 4E-13   |
|                       |                 |                     |                          |                     | >gb ABA99056.1  expressed protein [Oryza sativa (japonica cultivar-group)]                                                                                                                                                                                                                                                                                                                                                                                                                                                                                                                                                                   | 417   | 1E-11   |
| DV493987              | 1.04E-03        | Mo17<B73=F1         | 1.49                     | 10                  | >gb ABA96078.1  RNA polymerase Rpb3/Rpb11 dimerisation domain, putative [Oryzasativa (japonica cultivar-group)]                                                                                                                                                                                                                                                                                                                                                                                                                                                                                                                              | 108   | 3E-40   |
|                       |                 |                     |                          |                     | >ref NP_180514.1  ATRPC14; DNA binding / DNA-directed RNA polymerase [Arabidopsisthaliana] ref NP_001031443.1  ATRPC14; DNA binding / DNA-directed RNA polymerase [Arabidopsis thaliana] gb AAC95185.1  DNA-directed RNA polymerase 14 kDa subunit (AtRPAC14) [Arabidopsis thaliana] gb AAO50492.1  putative DNA-directed RNA polymerase 14 kDa subunit (AtRPAC14) [Arabidopsis thaliana] dbj BAC43525.1  putative DNA-directed RNA polymerase 14 kDa subunit AtRPAC14 [Arabidopsis thaliana] gb AAC49454.1  Arabidopsis thaliana RNA polymerase I(A) and III(C) 14 kDa subunit gb AAC49453.1  RNA polymerase I(A) and III(C) 14 kDa subunit | 122   | 3E-26   |
|                       |                 |                     |                          |                     | >ref XP_710709.1  RNA polymerase I and III shared subunit Rpc19 [Candida albicansSC5314] ref XP_710695.1  RNA polymerase I and III shared subunit Rpc19 [Candida albicans SC5314] gb EAK91461.1  potential RNA Polymerase I and III shared subunit Rpc19 [Candida albicans SC5314] gb EAK91447.1  potential RNA Polymerase I and III shared subunit Rpc19 [Candida albicans SC5314]                                                                                                                                                                                                                                                          | 131   | 2E-17   |



**Table 4. Microarray analysis results, mode of gene action classification, and BLAST annotation for the 1,367 ESTs identified as differentially expressed among genotypes (15% FDR)**

| GenBank accession no. | Overall P value | Significant pattern | Fold change <sup>‡</sup> | Sector <sup>‡</sup> | BLAST annotation*                                                                                                                                                                                                                                                                                                                                | Score | E value |
|-----------------------|-----------------|---------------------|--------------------------|---------------------|--------------------------------------------------------------------------------------------------------------------------------------------------------------------------------------------------------------------------------------------------------------------------------------------------------------------------------------------------|-------|---------|
|                       |                 |                     |                          |                     | >emb CAG84870.1  unnamed protein product [Debaryomyces hansenii CBS767]ref XP_456893.1  hypothetical protein DEHA0A13409g [Debaryomyces hansenii CBS767]                                                                                                                                                                                         | 134   | 3E-16   |
|                       |                 |                     |                          |                     | >ref XP_504476.1  hypothetical protein [Yarrowia lipolytica]emb CAG80079.1  unnamed protein product [Yarrowia lipolytica CLIB122]                                                                                                                                                                                                                | 140   | 1E-15   |
| CB605087              | 1.05E-03        | B73<F1<Mo17         | 1.37                     | 4                   | >emb CAA40564.1  H2B histone [Zea mays]sp P30755 H2B1 MAIZE Histone H2B.1                                                                                                                                                                                                                                                                        | 151   | 5E-37   |
|                       |                 |                     |                          |                     | >emb CAA49584.1  H2B histone [Zea mays]sp Q43261 H2B3 MAIZE Histone H2B.3                                                                                                                                                                                                                                                                        | 153   | 6E-37   |
|                       |                 |                     |                          |                     | >ref XP_475912.1  putative histone H2B [Oryza sativa (japonica cultivar-group)]gb AAU44113.1  putative histone H2B [Oryza sativa (japonica cultivar-group)]                                                                                                                                                                                      |       |         |
|                       |                 |                     |                          |                     | gb AAT69583.1  putative histone H2B [Oryza sativa (japonica cultivar-group)]                                                                                                                                                                                                                                                                     | 152   | 1E-36   |
|                       |                 |                     |                          |                     | >ref NP_909298.1  putative histone H2B [Oryza sativa (japonica cultivar-group)]dbj BAB44055.1  putative histone H2B [Oryza sativa (japonica cultivar-group)]                                                                                                                                                                                     | 155   | 1E-36   |
|                       |                 |                     |                          |                     | >emb CAA49585.1  H2B histone [Zea mays]sp P49120 H2B4 MAIZE Histone H2B.4                                                                                                                                                                                                                                                                        | 137   | 1E-36   |
| DV489818              | 1.07E-03        | B73<F1=Mo17         | 1.63                     | 3                   | ns                                                                                                                                                                                                                                                                                                                                               |       |         |
| DV621243              | 1.09E-03        | Mo17<B73=F1         | 1.35                     | 10                  | >ref XP_466196.1  putative purine nucleotide binding protein [Oryza sativa (japonica cultivar-group)] ref XP_506823.1  PREDICTED P0470G10.26 gene product [Oryza sativa (japonica cultivar-group)] dbj BAD33311.1  putative purine nucleotide binding protein [Oryza sativa (japonica cultivar-group)]                                           | 304   | 1E-41   |
|                       |                 |                     |                          |                     | >dbj BAD94895.1  putative protein [Arabidopsis thaliana]                                                                                                                                                                                                                                                                                         | 298   | 2E-31   |
|                       |                 |                     |                          |                     | >ref NP_197629.1  EMB1705; ATP binding [Arabidopsis thaliana]dbj BAB08336.1  unnamed protein product [Arabidopsis thaliana]                                                                                                                                                                                                                      | 291   | 9E-26   |
|                       |                 |                     |                          |                     | >ref XP_640644.1  hypothetical protein DDB0204674 [Dictyostelium discoideum]gb EAL66655.1  hypothetical protein DDB0204674 [Dictyostelium discoideum]                                                                                                                                                                                            | 315   | 2E-13   |
|                       |                 |                     |                          |                     | >ref XP_794415.1  PREDICTED: similar to CG10222-PA [Strongylocentrotus purpuratus]                                                                                                                                                                                                                                                               | 308   | 1E-12   |
| CB331781              | 1.09E-03        | Mo17<B73=F1         | 1.38                     | 10                  | >gb AAP80858.1  ribosomal protein L19 [Triticum aestivum]                                                                                                                                                                                                                                                                                        | 209   | 2E-56   |
|                       |                 |                     |                          |                     | >gb AAT76364.1  putative ribosomal protein L19 [Oryza sativa (japonica cultivar-group)] gb AAP05800.1  putative ribosomal protein L19 [Oryza sativa (japonica cultivar-group)]                                                                                                                                                                   | 206   | 2E-56   |
|                       |                 |                     |                          |                     | >gb AAT08672.1  ribosomal protein L19 [Hyacinthus orientalis]                                                                                                                                                                                                                                                                                    | 203   | 8E-55   |
|                       |                 |                     |                          |                     | >ref NP_192132.1  structural constituent of ribosome [Arabidopsis thaliana]emb CAB80716.1  putative ribosomal protein L19 [Arabidopsis thaliana]                                                                                                                                                                                                 |       |         |
|                       |                 |                     |                          |                     | gb AAL66909.1  similar to 60S ribosome protein L19 [Arabidopsis thaliana] gb AAK62438.1  Similar to 60S ribosome protein L19 [Arabidopsis thaliana]                                                                                                                                                                                              |       |         |
|                       |                 |                     |                          |                     | sp P49693 RL19C ARATH 60S ribosomal protein L19-3                                                                                                                                                                                                                                                                                                | 208   | 6E-53   |
|                       |                 |                     |                          |                     | >gb AAC28170.1  T2H3.3 [Arabidopsis thaliana]pir T01426 ribosomal protein L19.T2H3.3 - Arabidopsis thaliana                                                                                                                                                                                                                                      | 200   | 6E-53   |
| BG842356              | 1.10E-03        | F1=Mo17<B73         | 1.7                      | 9                   | ns                                                                                                                                                                                                                                                                                                                                               |       |         |
| CB833633              | 1.10E-03        | B73=F1<Mo17         | 1.55                     | 4                   | ns                                                                                                                                                                                                                                                                                                                                               |       |         |
| CD001762              | 1.10E-03        | Mo17<F1<B73         | 1.31                     | 10                  | >gb ABA94601.1  ribosomal protein S4 [Oryza sativa (japonica cultivar-group)]gb ABA94599.1  ribosomal protein S4 [Oryza sativa (japonica cultivar-group)]                                                                                                                                                                                        | 195   | 2E-83   |
|                       |                 |                     |                          |                     | >gb ABA94602.1  ribosomal protein S4 [Oryza sativa (japonica cultivar-group)]                                                                                                                                                                                                                                                                    | 192   | 4E-80   |
|                       |                 |                     |                          |                     | >emb CAG47084.1  40S ribosomal protein S9 [Catharanthus roseus]                                                                                                                                                                                                                                                                                  | 197   | 5E-80   |
|                       |                 |                     |                          |                     | >gb ABA46767.1  unknown [Solanum tuberosum]                                                                                                                                                                                                                                                                                                      | 197   | 2E-79   |
|                       |                 |                     |                          |                     | >gb AAU93594.1  putative ribosomal protein [Solanum demissum]                                                                                                                                                                                                                                                                                    | 197   | 9E-79   |
| DV491227              | 1.11E-03        | F1=Mo17<B73         | 1.53                     | 9                   | >gb AAL66770.1  cytochrome P450 monooxygenase CYP72A5 [Zea mays]                                                                                                                                                                                                                                                                                 | 527   | e-126   |
|                       |                 |                     |                          |                     | >gb AAM77716.1  cytochrome P450 monooxygenase CYP72A16 [Zea mays]                                                                                                                                                                                                                                                                                | 528   | e-102   |
|                       |                 |                     |                          |                     | >gb AAK38092.1  putative cytochrome P450 [Lolium rigidum]                                                                                                                                                                                                                                                                                        | 525   | e-102   |
|                       |                 |                     |                          |                     | >gb AAK38091.1  putative cytochrome P450 [Lolium rigidum]                                                                                                                                                                                                                                                                                        | 525   | e-101   |
|                       |                 |                     |                          |                     | >gb AAK38090.1  putative cytochrome P450 [Lolium rigidum]                                                                                                                                                                                                                                                                                        | 525   | e-100   |
| DV621609              | 1.12E-03        | Mo17<F1<B73         | 1.52                     | 9                   | >dbj BAD95431.1  DEAD BOX RNA helicase RH15 - like protein [Arabidopsis thaliana]                                                                                                                                                                                                                                                                | 177   | 2E-17   |
|                       |                 |                     |                          |                     | >emb CAB96655.1  DEAD BOX RNA helicase RH15 [Arabidopsis thaliana]                                                                                                                                                                                                                                                                               | 427   | 1E-16   |
|                       |                 |                     |                          |                     | >emb CAB96652.1  DEAD BOX RNA helicase RH15-like protein [Arabidopsis thaliana]                                                                                                                                                                                                                                                                  | 435   | 1E-16   |
|                       |                 |                     |                          |                     | >emb CAA09205.1  RNA helicase [Arabidopsis thaliana]                                                                                                                                                                                                                                                                                             | 451   | 1E-16   |
|                       |                 |                     |                          |                     | >ref NP_568245.1  ATP binding / ATP-dependent helicase/ helicase/ nucleic acidbinding [Arabidopsis thaliana] gb AAN46806.1  AT5g11170/F2111_60 [Arabidopsis thaliana] gb AAL15393.1  AT5g11200/F2111_90 [Arabidopsis thaliana] gb AAK96496.1  AT5g11170/F2111_60 [Arabidopsis thaliana] gb AAK55671.1  AT5g11200/F2111_90 [Arabidopsis thaliana] | 427   | 1E-16   |
| DV491424              | 1.12E-03        | B73<F1<Mo17         | 1.56                     | 3                   | >gb AAN05502.1  Putative ATP phosphoribosyl transferase [Oryza sativa (japonica cultivar-group)]                                                                                                                                                                                                                                                 | 170   | 4E-13   |
|                       |                 |                     |                          |                     | >gb AAT74598.1  chloroplast ATP phosphoribosyl transferase [Alyssum montanum]                                                                                                                                                                                                                                                                    | 409   | 8E-10   |
|                       |                 |                     |                          |                     | >gb AAT74590.1  chloroplast ATP phosphoribosyl transferase [Alyssum lesbiacum]                                                                                                                                                                                                                                                                   | 406   | 8E-10   |
|                       |                 |                     |                          |                     | >gb AAM65917.1  ATP phosphoribosyl transferase [Arabidopsis thaliana]                                                                                                                                                                                                                                                                            | 413   | 1E-9    |
|                       |                 |                     |                          |                     | >ref NP_563853.1  ATATP-PR2 (ATP PHOSPHORIBOSYL TRANSFERASE 2); ATPphosphoribosyltransferase [Arabidopsis thaliana] gb AAP37860.1  AT1g09795 [Arabidopsis thaliana] dbj BAC43107.1  putative ATP phosphoribosyl transferase AtATP-PR2 [Arabidopsis thaliana] gb AAN72065.1  ATP phosphoribosyl transferase [Arabidopsis thaliana]                | 413   | 1E-9    |
| BM080737              | 1.12E-03        | Mo17<B73=F1         | 1.57                     | 10                  | >gb AAP80664.1  S28 ribosomal protein [Triticum aestivum]                                                                                                                                                                                                                                                                                        | 86    | 2E-26   |
|                       |                 |                     |                          |                     | >emb CAA04565.1  rpS28 [Hordeum vulgare subsp. vulgare]                                                                                                                                                                                                                                                                                          | 65    | 1E-25   |

**Table 4. Microarray analysis results, mode of gene action classification, and BLAST annotation for the 1,367 ESTs identified as differentially expressed among genotypes (15% FDR)**

| GenBank accession no. | Overall P value | Significant pattern | Fold change <sup>†</sup> | Sector <sup>‡</sup> | BLAST annotation*                                                                                                                                                                                                                                                                                                                                                                                           | Score | E value |
|-----------------------|-----------------|---------------------|--------------------------|---------------------|-------------------------------------------------------------------------------------------------------------------------------------------------------------------------------------------------------------------------------------------------------------------------------------------------------------------------------------------------------------------------------------------------------------|-------|---------|
|                       |                 |                     |                          |                     | >emb CAA57636.1  small subunit ribosomal protein S28 [Zea mays]sp P46302 RS28 MAIZE 40S ribosomal protein S28                                                                                                                                                                                                                                                                                               | 65    | 2E-25   |
|                       |                 |                     |                          |                     | >emb CAA10103.1  ribosomal protein S28 [Prunus persica]emb CAA10102.1  ribosomal protein S28 [Prunus persica] emb CAA10101.1  ribosomal protein S28 [Prunus persica]                                                                                                                                                                                                                                        | 65    | 6E-24   |
|                       |                 |                     |                          |                     | >ref NP_921446.1  unknown protein [Oryza sativa (japonica cultivar-group)]                                                                                                                                                                                                                                                                                                                                  | 713   | 1E-23   |
| CB329874              | 1.14E-03        | Mo17<B73=F1         | 1.39                     | 10                  | >ref XP_475416.1  putative 40S ribosomal protein S26 [Oryza sativa (japonica cultivar-group)] gb AAT01360.1  putative 40S ribosomal protein S26 [Oryza sativa (japonica cultivar-group)]                                                                                                                                                                                                                    | 194   | 4E-37   |
|                       |                 |                     |                          |                     | >dbj BAD87076.1  putative ribosomal protein S26 [Oryza sativa (japonica cultivar-group)] dbj BAD73505.1  putative ribosomal protein S26 [Oryza sativa (japonica cultivar-group)]                                                                                                                                                                                                                            | 133   | 4E-37   |
|                       |                 |                     |                          |                     | >sp P49216 RS26 ORYSA 40S ribosomal protein S26 (S31)dbj BAA07208.1  ribosomal protein S31 [Oryza sativa (japonica cultivar-group)]                                                                                                                                                                                                                                                                         | 133   | 4E-36   |
|                       |                 |                     |                          |                     | >gb AAD47346.1  ribosomal protein S26 [Pisum sativum]                                                                                                                                                                                                                                                                                                                                                       | 130   | 2E-31   |
|                       |                 |                     |                          |                     | >ref NP_191193.1  structural constituent of ribosome [Arabidopsis thaliana]emb CAB87433.1  40S ribosomal protein S26 homolog [Arabidopsis thaliana]                                                                                                                                                                                                                                                         |       |         |
|                       |                 |                     |                          |                     | gb AAM91494.1  AT3g56340/F18O21_300 [Arabidopsis thaliana] gb AAK63990.1  AT3g56340/F18O21_300 [Arabidopsis thaliana]                                                                                                                                                                                                                                                                                       | 130   | 9E-30   |
| CB603937              | 1.15E-03        | B73<F1=Mo17         | 1.49                     | 3                   | >emb CAA33620.1  GAPDH [Zea mays]sp P08735 G3PC MAIZE Glyceraldehyde-3-phosphate dehydrogenase, cytosolic 1                                                                                                                                                                                                                                                                                                 | 337   | 2E-79   |
|                       |                 |                     |                          |                     | >emb CAA30151.1  unnamed protein product [Zea mays]                                                                                                                                                                                                                                                                                                                                                         | 337   | 2E-79   |
|                       |                 |                     |                          |                     | >emb CAA51676.1  glyceraldehyde 3-phosphate dehydrogenase (phosphorylating) [Zeamays] sp Q09054 G3PD_MAIZE Glyceraldehyde-3-phosphate dehydrogenase, cytosolic 2 gb AAA87880.1  glyceraldehyde-3-phosphate dehydrogenase gb AAA87578.1  cytosolic glyceraldehyde-3-phosphate dehydrogenase GAPC2                                                                                                            | 337   | 2E-77   |
|                       |                 |                     |                          |                     | >emb CAA42901.1  glyceraldehyde 3-phosphate dehydrogenase [Hordeum vulgare]sp P26517 G3PX_HORVU Glyceraldehyde-3-phosphate dehydrogenase, cytosolic                                                                                                                                                                                                                                                         | 337   | 2E-76   |
|                       |                 |                     |                          |                     | >ref XP_479895.1  glyceraldehyde 3-phosphate dehydrogenase, cytosolic [Oryza sativa(japonica cultivar-group)] ref XP_507107.1  PREDICTED OJ1163_G08.15 gene product [Oryza sativa (japonica cultivar-group)] dbj BAD08850.1  glyceraldehyde 3-phosphate dehydrogenase, cytosolic [Oryza sativa (japonica cultivar-group)] sp Q42977 G3PC ORYSA Glyceraldehyde-3-phosphate dehydrogenase, cytosolic (PP38)   | 337   | 4E-74   |
| BM075141              | 1.16E-03        | Mo17<B73=F1         | 1.45                     | 11                  | ns                                                                                                                                                                                                                                                                                                                                                                                                          |       |         |
| DV491702              | 1.17E-03        | F1=Mo17<B73         | 1.54                     | 8                   | >gb AAD15902.1  beta-amylase [Zea mays]                                                                                                                                                                                                                                                                                                                                                                     | 488   | 5E-66   |
|                       |                 |                     |                          |                     | >emb CAA81091.1  beta-amylase [Zea mays]sp P55005 AMYB MAIZE Beta-amylase (1,4-alpha-D-glucan maltohydrolase)                                                                                                                                                                                                                                                                                               | 488   | 5E-66   |
|                       |                 |                     |                          |                     | >gb AAX37358.1  tissue-ubiquitous beta-amylase 2 [Hordeum vulgare subsp. vulgare]                                                                                                                                                                                                                                                                                                                           | 505   | 2E-52   |
|                       |                 |                     |                          |                     | >gb AAX37357.1  tissue-ubiquitous beta-amylase 2 [Hordeum vulgare subsp. vulgare]                                                                                                                                                                                                                                                                                                                           | 505   | 2E-52   |
|                       |                 |                     |                          |                     | >emb CAA67128.1  beta-amylase [Triticum aestivum]sp P93594 AMYB WHEAT Beta-amylase (1,4-alpha-D-glucan maltohydrolase)                                                                                                                                                                                                                                                                                      | 503   | 2E-52   |
| BM331946              | 1.17E-03        | Mo17<B73=F1         | 1.67                     | 10                  | ns                                                                                                                                                                                                                                                                                                                                                                                                          |       |         |
| DV621137              | 1.19E-03        | Mo17<B73=F1         | 1.32                     | 10                  | >sp Q08069 RS8 MAIZE 40S ribosomal protein S8gb AAB06330.1  ribosomal protein S8                                                                                                                                                                                                                                                                                                                            | 221   | 6E-60   |
|                       |                 |                     |                          |                     | >emb CAE05511.1  OSJNBa0038P21.4 [Oryza sativa (japonica cultivar-group)]                                                                                                                                                                                                                                                                                                                                   | 221   | 1E-53   |
|                       |                 |                     |                          |                     | >ref XP_465742.1  putative 40S ribosomal protein S8 [Oryza sativa (japonica cultivar-group)] ref XP_506804.1  PREDICTED P0483C08.42 gene product [Oryza sativa (japonica cultivar-group)] dbj BAD21871.1  putative 40S ribosomal protein S8 [Oryza sativa (japonica cultivar-group)] dbj BAD21876.1  putative 40S ribosomal protein S8 [Oryza sativa (japonica cultivar-group)]                             | 220   | 3E-53   |
|                       |                 |                     |                          |                     | >sp P49199 RS8 ORYSA 40S ribosomal protein S8dbj BAA07207.1  ribosomal protein S8 [Oryza sativa (japonica cultivar-group)]                                                                                                                                                                                                                                                                                  | 220   | 4E-50   |
|                       |                 |                     |                          |                     | >gb ABA46755.1  unknown [Solanum tuberosum]                                                                                                                                                                                                                                                                                                                                                                 | 224   | 4E-49   |
| CD485041              | 1.19E-03        | Mo17<B73=F1         | 1.38                     | 11                  | >emb CAB57992.1  superoxide dismutase-4AP [Zea mays]sp P23345 SODC4 MAIZE Superoxide dismutase [Cu-Zn] 4A                                                                                                                                                                                                                                                                                                   | 152   | 1E-76   |
|                       |                 |                     |                          |                     | >sp P23346 SODC5 MAIZE Superoxide dismutase [Cu-Zn] 4AP                                                                                                                                                                                                                                                                                                                                                     | 152   | 1E-76   |
|                       |                 |                     |                          |                     | >emb CAB57993.1  superoxide dismutase-4A [Zea mays]gb AAB49913.1  superoxide dismutase 4A                                                                                                                                                                                                                                                                                                                   | 152   | 2E-74   |
|                       |                 |                     |                          |                     | >sp P28757 SODC2_ORYSA Superoxide dismutase [Cu-Zn] 2gb AAC14465.1  cytosolic copper/zinc-superoxide dismutase [Oryza sativa] dbj BAA00800.1  copper/zinc-superoxide dismutase [Oryza sativa (japonica cultivar-group)]                                                                                                                                                                                     | 152   | 9E-71   |
|                       |                 |                     |                          |                     | >gb AA56345.1  cytoplasmic copper/zinc-superoxide dismutase [Oryza sativa (indicacultivar-group)] sp P28756 SODC1_ORYSA Superoxide dismutase [Cu-Zn] 1 gb AAC14464.1  cytosolic copper/zinc-superoxide dismutase [Oryza sativa] dbj BAA00799.1  copper/zinc-superoxide dismutase [Oryza sativa (japonica cultivar-group)] prf 2111424A Cu/Zn superoxide dismutase                                           | 152   | 3E-70   |
| CD484562              | 1.20E-03        | Mo17<B73=F1         | 1.38                     | 10                  | ns                                                                                                                                                                                                                                                                                                                                                                                                          |       |         |
| BM350700              | 1.20E-03        | F1=Mo17<B73         | 1.51                     | 9                   | ns                                                                                                                                                                                                                                                                                                                                                                                                          |       |         |
| DV491285              | 1.21E-03        | F1=Mo17<B73         | 1.5                      | 9                   | >emb CAA77808.1  lactate dehydrogenase [Zea mays]sp P29038 LDH MAIZE L-lactate dehydrogenase (LDH)                                                                                                                                                                                                                                                                                                          | 354   | 4E-65   |
|                       |                 |                     |                          |                     | >ref XP_463815.1  lactate dehydrogenase [Oryza sativa (japonica cultivar-group)]dbj BAD28080.1  lactate dehydrogenase [Oryza sativa (japonica cultivar-group)] dbj BAD07543.1  lactate dehydrogenase [Oryza sativa (japonica cultivar-group)] dbj BAD06283.1  lactate dehydrogenase [Oryza sativa (japonica cultivar-group)] dbj BAA02971.1  lactate dehydrogenase [Oryza sativa (japonica cultivar-group)] | 353   | 3E-57   |
|                       |                 |                     |                          |                     | >ref XP_506679.1  PREDICTED OJ1212_C06.24 gene product [Oryza sativa (japonica cultivar-group)]                                                                                                                                                                                                                                                                                                             | 392   | 3E-57   |
|                       |                 |                     |                          |                     | >sp P22989 LDHB HORVU L-lactate dehydrogenase B (LDH-B)gb AAA62697.1  L-lactate dehydrogenase                                                                                                                                                                                                                                                                                                               | 344   | 3E-57   |
|                       |                 |                     |                          |                     | >sp P22988 LDHA HORVU L-lactate dehydrogenase A (LDH-A)gb AAA62696.1  L-lactate dehydrogenase                                                                                                                                                                                                                                                                                                               | 356   | 1E-55   |

**Table 4. Microarray analysis results, mode of gene action classification, and BLAST annotation for the 1,367 ESTs identified as differentially expressed among genotypes (15% FDR)**

| GenBank accession no. | Overall P value | Significant pattern | Fold change <sup>†</sup> | Sector <sup>‡</sup> | BLAST annotation*                                                                                                                                                                                                                                                                                                                                                                                                          | Score | E value |
|-----------------------|-----------------|---------------------|--------------------------|---------------------|----------------------------------------------------------------------------------------------------------------------------------------------------------------------------------------------------------------------------------------------------------------------------------------------------------------------------------------------------------------------------------------------------------------------------|-------|---------|
| CD528042              | 1.21E-03        | Mo17<B73=F1         | 1.4                      | 10                  | >sp Q08062 MDHC MAIZE Malate dehydrogenase, cytoplasmic[gb AAB64290.1  cytoplasmic malate dehydrogenase [Zea mays]                                                                                                                                                                                                                                                                                                         | 332   | e-111   |
|                       |                 |                     |                          |                     | >ref NP_921996.1  cytoplasmic malate dehydrogenase [Oryza sativa (japonica cultivar-group)] [gb AAG13573.1  cytoplasmic malate dehydrogenase [Oryza sativa]                                                                                                                                                                                                                                                                |       |         |
|                       |                 |                     |                          |                     | gb AAP54283.1  cytoplasmic malate dehydrogenase [Oryza sativa (japonica cultivar-group)] [gb AAK26431.1  cytoplasmic malate dehydrogenase [Oryza sativa]                                                                                                                                                                                                                                                                   |       |         |
|                       |                 |                     |                          |                     | sp Q7XDC8 MDHC ORYZA Malate dehydrogenase, cytoplasmic (PP37)                                                                                                                                                                                                                                                                                                                                                              | 332   | e-104   |
|                       |                 |                     |                          |                     | >emb CAC12826.1  malate dehydrogenase [Nicotiana tabacum]                                                                                                                                                                                                                                                                                                                                                                  | 332   | e-101   |
| DV551080              | 1.21E-03        | Mo17<B73=F1         | 1.69                     | 10                  | >gb AAL11502.1  NAD-dependent malate dehydrogenase [Prunus persica]                                                                                                                                                                                                                                                                                                                                                        | 332   | e-101   |
|                       |                 |                     |                          |                     | >gb ABC01890.1  malate dehydrogenase-like protein [Solanum tuberosum]                                                                                                                                                                                                                                                                                                                                                      | 332   | e-101   |
|                       |                 |                     |                          |                     | >ref XP_473776.1  OSJNBa0041A02.14 [Oryza sativa (japonica cultivar-group)] [emb CAD41867.2  OSJNBa0041A02.14 [Oryza sativa (japonica cultivar-group)]                                                                                                                                                                                                                                                                     | 396   | 4E-99   |
|                       |                 |                     |                          |                     | >gb AAM65412.1  pectin acetyltransferase [Arabidopsis thaliana]                                                                                                                                                                                                                                                                                                                                                            | 391   | 8E-81   |
|                       |                 |                     |                          |                     | >ref NP_567585.1  carboxylic ester hydrolase [Arabidopsis thaliana] [gb AAL47339.1  putative pectinacetyltransferase protein [Arabidopsis thaliana] [gb AAK96722.1  putative pectinacetyltransferase protein [Arabidopsis thaliana] [gb AAM64921.1  putative pectinacetyltransferase protein [Arabidopsis thaliana]                                                                                                        | 391   | 4E-80   |
| BM075714              | 1.22E-03        | B73<F1=Mo17         | 1.6                      | 3                   | >ref NP_199341.1  carboxylic ester hydrolase [Arabidopsis thaliana] [gb AAL15296.1  AT5g45280/K9E15_6 [Arabidopsis thaliana] [dbj BAB10249.1  pectin acetyltransferase [Arabidopsis thaliana]                                                                                                                                                                                                                              | 391   | 7E-80   |
|                       |                 |                     |                          |                     | >emb CAA67728.1  pectinacetyltransferase precursor [Vigna radiata var. radiata]                                                                                                                                                                                                                                                                                                                                            | 399   | 8E-78   |
|                       |                 |                     |                          |                     | ns                                                                                                                                                                                                                                                                                                                                                                                                                         |       |         |
|                       |                 |                     |                          |                     | >ref NP_922008.1  putative glucose-6-phosphate/phosphate-translocator [Oryza sativa(japonica cultivar-group)] [gb AAG13577.1  putative glucose-6-phosphate/phosphate-translocator [Oryza sativa]                                                                                                                                                                                                                           | 342   | 9E-16   |
|                       |                 |                     |                          |                     | >gb AAK21346.1  putative phosphate translocator [Oryza sativa (japonica cultivar-group)] [gb ABB47794.1  glucose-6-phosphate/phosphate-translocator, putative [Oryza sativa (japonica cultivar-group)]                                                                                                                                                                                                                     | 370   | 9E-16   |
| DV550599              | 1.25E-03        | B73<F1=Mo17         | 2.22                     | 3                   | >ref XP_466859.1  phosphate translocator-like [Oryza sativa (japonica cultivar-group)] [dbj BAD23725.1  phosphate translocator-like [Oryza sativa (japonica cultivar-group)]                                                                                                                                                                                                                                               | 341   | 3E-8    |
|                       |                 |                     |                          |                     | >ref NP_180604.1  unknown protein [Arabidopsis thaliana] [gb AAB63090.1  putative integral membrane protein [Arabidopsis thaliana]                                                                                                                                                                                                                                                                                         | 200   | 5E-6    |
|                       |                 |                     |                          |                     | >dbj BAD93797.1  integral membrane protein -like [Arabidopsis thaliana] [gb AAP42755.1  At2g30460 [Arabidopsis thaliana] [dbj BAD44037.1  integral membrane protein -like [Arabidopsis thaliana] [dbj BAD43941.1  integral membrane protein -like [Arabidopsis thaliana] [dbj BAD43929.1  integral membrane protein -like [Arabidopsis thaliana] [gb AAO00831.1  putative integral membrane protein [Arabidopsis thaliana] | 353   | 5E-6    |
|                       |                 |                     |                          |                     | ns                                                                                                                                                                                                                                                                                                                                                                                                                         |       |         |
|                       |                 |                     |                          |                     | >gb AAB37265.1  S-like RNase                                                                                                                                                                                                                                                                                                                                                                                               | 269   | 1E-81   |
| BG841963              | 1.25E-03        | F1=Mo17<B73         | 1.57                     | 8                   | >gb AAF45043.1  RNase S-like protein precursor [Hordeum vulgare]                                                                                                                                                                                                                                                                                                                                                           | 252   | 1E-47   |
|                       |                 |                     |                          |                     | >dbj BAD34375.1  putative RNase S-like protein precursor [Oryza sativa (japonica cultivar-group)] [dbj BAD34238.1  putative RNase S-like protein precursor [Oryza sativa (japonica cultivar-group)]                                                                                                                                                                                                                        | 251   | 4E-42   |
|                       |                 |                     |                          |                     | >dbj BAD34374.1  putative RNase S-like protein precursor [Oryza sativa (japonica cultivar-group)] [dbj BAD34237.1  putative RNase S-like protein precursor [Oryza sativa (japonica cultivar-group)]                                                                                                                                                                                                                        | 259   | 4E-42   |
|                       |                 |                     |                          |                     | >gb AAM18521.1  S-like RNase [Triticum aestivum]                                                                                                                                                                                                                                                                                                                                                                           | 245   | 1E-26   |
|                       |                 |                     |                          |                     | ns                                                                                                                                                                                                                                                                                                                                                                                                                         |       |         |
| CD651033              | 1.26E-03        | F1=Mo17<B73         | 1.51                     | 9                   | >ref XP_549818.1  unknown protein [Oryza sativa (japonica cultivar-group)] [dbj BAD45509.1  unknown protein [Oryza sativa (japonica cultivar-group)]                                                                                                                                                                                                                                                                       | 265   | 1E-68   |
|                       |                 |                     |                          |                     | >ref NP_908341.1  P0672D08.28 [Oryza sativa (japonica cultivar-group)] [dbj BAB92141.1  contains ESTs AU032851(S13343), AU089731(S13343)-unknown protein [Oryza sativa (japonica cultivar-group)] [dbj BAB62639.1  contains ESTs AU032851(S13343), AU089731(S13343)-unknown protein [Oryza sativa (japonica cultivar-group)]                                                                                               | 291   | 3E-64   |
|                       |                 |                     |                          |                     | >ref NP_189325.2  ATP binding / shikimate kinase [Arabidopsis thaliana] [gb AAS92323.1  At3g26900 [Arabidopsis thaliana] [gb AAS76227.1  At3g26900 [Arabidopsis thaliana] [dbj BAB01237.1  unnamed protein product [Arabidopsis thaliana]                                                                                                                                                                                  | 280   | 5E-31   |
|                       |                 |                     |                          |                     | >ref NP_973507.1  ATP binding / shikimate kinase [Arabidopsis thaliana]                                                                                                                                                                                                                                                                                                                                                    | 304   | 3E-14   |
|                       |                 |                     |                          |                     | >ref NP_179785.2  ATP binding / shikimate kinase [Arabidopsis thaliana]                                                                                                                                                                                                                                                                                                                                                    | 303   | 3E-14   |
| DV494968              | 1.27E-03        | Mo17<B73=F1         | 1.43                     | 10                  | ns                                                                                                                                                                                                                                                                                                                                                                                                                         |       |         |
|                       |                 |                     |                          |                     | >ref XP_475849.1  putative threonine synthase [Oryza sativa (japonica cultivar-group)] [gb AAT39260.1  putative threonine synthase [Oryza sativa (japonica cultivar-group)]                                                                                                                                                                                                                                                | 521   | 5E-75   |
|                       |                 |                     |                          |                     | >ref NP_917055.1  putative threonine synthase [Oryza sativa (japonica cultivar-group)] [dbj BAC10696.1  threonine synthase-like [Oryza sativa (japonica cultivar-group)]                                                                                                                                                                                                                                                   | 525   | 1E-66   |
|                       |                 |                     |                          |                     | >gb AAB04607.1  threonine synthase                                                                                                                                                                                                                                                                                                                                                                                         | 525   | 2E-56   |
|                       |                 |                     |                          |                     | >ref NP_194713.1  MTO2 (METHIONINE OVER-ACCUMULATOR); threonine synthase [Arabidopsis thaliana] [emb CAB79742.1  threonine synthase [Arabidopsis thaliana] [emb CAB43659.1  threonine synthase [Arabidopsis thaliana] [sp Q9S7B5 THRC_ARATH Threonine synthase, chloroplast precursor (TS) [dbj BAA77707.1  threonine synthase [Arabidopsis thaliana]                                                                      | 526   | 2E-56   |
| DV621529              | 1.27E-03        | B73<F1<Mo17         | 1.39                     | 3                   | >ref NP_974637.1  MTO2 (METHIONINE OVER-ACCUMULATOR); threonine synthase [Arabidopsis thaliana]                                                                                                                                                                                                                                                                                                                            | 535   | 2E-56   |
|                       |                 |                     |                          |                     | ns                                                                                                                                                                                                                                                                                                                                                                                                                         |       |         |
|                       |                 |                     |                          |                     | >ref XP_473049.1  OSJNBa0029H02.5 [Oryza sativa (japonica cultivar-group)]                                                                                                                                                                                                                                                                                                                                                 | 326   | 5E-66   |
|                       |                 |                     |                          |                     |                                                                                                                                                                                                                                                                                                                                                                                                                            |       |         |
|                       |                 |                     |                          |                     |                                                                                                                                                                                                                                                                                                                                                                                                                            |       |         |
| DV490323              | 1.28E-03        | Mo17<B73=F1         | 3.97                     | 10                  |                                                                                                                                                                                                                                                                                                                                                                                                                            |       |         |

**Table 4. Microarray analysis results, mode of gene action classification, and BLAST annotation for the 1,367 ESTs identified as differentially expressed among genotypes (15% FDR)**

| GenBank accession no. | Overall P value | Significant pattern | Fold change <sup>‡</sup> | Sector <sup>‡</sup> | BLAST annotation*                                                                                                                                                                                                                                                                                                                                                                                                                     | Score | E value |
|-----------------------|-----------------|---------------------|--------------------------|---------------------|---------------------------------------------------------------------------------------------------------------------------------------------------------------------------------------------------------------------------------------------------------------------------------------------------------------------------------------------------------------------------------------------------------------------------------------|-------|---------|
|                       |                 |                     |                          |                     | >emb CAE01627.3  OSJNBa0029H02.7 [Oryza sativa (japonica cultivar-group)]                                                                                                                                                                                                                                                                                                                                                             | 387   | 4E-47   |
|                       |                 |                     |                          |                     | >ref NP_194868.1  unknown protein [Arabidopsis thaliana]emb CAB79858.1  hypothetical protein [Arabidopsis thaliana] emb CAA16543.1  hypothetical protein [Arabidopsis thaliana]                                                                                                                                                                                                                                                       | 322   | 4E-22   |
|                       |                 |                     |                          |                     | >emb CAG12982.1  unnamed protein product [Tetraodon nigroviridis]                                                                                                                                                                                                                                                                                                                                                                     | 225   | 4E-16   |
|                       |                 |                     |                          |                     | >ref XP_420012.1  PREDICTED: similar to RIKEN cDNA 2410004I17 [Gallus gallus]                                                                                                                                                                                                                                                                                                                                                         | 752   | 5E-16   |
| CD484795              | 1.28E-03        | B73<F1=Mo17         | 1.42                     | 3                   | >dbj BAD88200.1  putative auxin response factor [Oryza sativa (japonica cultivar-group)]                                                                                                                                                                                                                                                                                                                                              | 808   | 9E-34   |
|                       |                 |                     |                          |                     | >dbj BAB85913.1  auxin response factor 2 [Oryza sativa]                                                                                                                                                                                                                                                                                                                                                                               | 791   | 9E-34   |
|                       |                 |                     |                          |                     | >ref NP_914881.1  auxin response factor 2 [Oryza sativa (japonica cultivar-group)]                                                                                                                                                                                                                                                                                                                                                    | 826   | 9E-34   |
|                       |                 |                     |                          |                     | >gb ABA98247.1  Auxin response factor, putative [Oryza sativa (japonica cultivar-group)]                                                                                                                                                                                                                                                                                                                                              | 840   | 2E-24   |
|                       |                 |                     |                          |                     | >gb ABA98246.1  Auxin response factor, putative [Oryza sativa (japonica cultivar-group)]                                                                                                                                                                                                                                                                                                                                              | 841   | 2E-24   |
| CA989208              | 1.30E-03        | Mo17<B73=F1         | 1.43                     | 11                  | >gb ABA96667.1  jacalin homolog [Oryza sativa (japonica cultivar-group)]                                                                                                                                                                                                                                                                                                                                                              | 307   | 1E-21   |
|                       |                 |                     |                          |                     | >gb ABA97248.1  jacalin homolog [Oryza sativa (japonica cultivar-group)]gb ABB51090.1  mannose-specific jacalin-related lectin [Oryza sativa (japonica cultivar-group)]                                                                                                                                                                                                                                                               | 306   | 2E-21   |
|                       |                 |                     |                          |                     | >gb AAF71261.2  beta-glucosidase aggregating factor precursor [Zea mays]                                                                                                                                                                                                                                                                                                                                                              | 306   | 6E-21   |
|                       |                 |                     |                          |                     | >gb AAA87042.1  putative 32.7 kDa jasmonate-induced protein [Hordeum vulgare]gb AAB72097.1  32 kDa protein [Hordeum vulgare]                                                                                                                                                                                                                                                                                                          | 304   | 7E-20   |
|                       |                 |                     |                          |                     | >gb AAR20919.1  jasmonate-induced protein [Triticum aestivum]                                                                                                                                                                                                                                                                                                                                                                         | 304   | 6E-19   |
| DV494824              | 1.31E-03        | Mo17<B73=F1         | 1.81                     | 10                  | >ref NP_913999.1  putative Acyl-CoA binding protein (ACBP) [Oryza sativa (japonica cultivar-group)] dbj BAC99898.1  putative Acyl-CoA binding protein (ACBP) [Oryza sativa (japonica cultivar-group)] dbj BAC57826.1  putative Acyl-CoA binding protein (ACBP) [Oryza sativa (japonica cultivar-group)]                                                                                                                               | 91    | 2E-33   |
|                       |                 |                     |                          |                     | >ref XP_463020.1  putative Acyl-CoA-binding protein [Oryza sativa (japonica cultivar-group)] gb AAR10857.1  putative Acyl-CoA-binding protein [Oryza sativa (japonica cultivar-group)]                                                                                                                                                                                                                                                | 155   | 3E-33   |
|                       |                 |                     |                          |                     | >dbj BAB85987.1  Acyl-CoA-binding protein [Panax ginseng]                                                                                                                                                                                                                                                                                                                                                                             | 87    | 4E-31   |
|                       |                 |                     |                          |                     | >emb CAB56694.1  Acyl-CoA binding protein (ACBP) [Digitalis lanata]                                                                                                                                                                                                                                                                                                                                                                   | 90    | 8E-31   |
|                       |                 |                     |                          |                     | >gb AAP82942.1  acyl-CoA-binding protein [Tropaeolum majus]                                                                                                                                                                                                                                                                                                                                                                           | 90    | 1E-30   |
| DV489568              | 1.31E-03        | B73=F1<Mo17         | 1.53                     | 4                   | >dbj BAD52953.1  unknown protein [Oryza sativa (japonica cultivar-group)]                                                                                                                                                                                                                                                                                                                                                             | 783   | 1E-43   |
|                       |                 |                     |                          |                     | >dbj BAD52952.1  unknown protein [Oryza sativa (japonica cultivar-group)]                                                                                                                                                                                                                                                                                                                                                             | 895   | 1E-43   |
|                       |                 |                     |                          |                     | >ref NP_916345.1  P0490D09.22 [Oryza sativa (japonica cultivar-group)]                                                                                                                                                                                                                                                                                                                                                                | 1194  | 1E-43   |
|                       |                 |                     |                          |                     | >ref NP_199176.1  nucleic acid binding [Arabidopsis thaliana]gb AAO64119.1  unknown protein [Arabidopsis thaliana] gb AAO42027.1  unknown protein [Arabidopsis thaliana] dbj BAB11626.1  unnamed protein product [Arabidopsis thaliana]                                                                                                                                                                                               | 831   | 1E-20   |
| CB605563              | 1.35E-03        | Mo17<B73=F1         | 1.52                     | 10                  | >ref NP_910160.1  cytoplasmic ribosomal protein L18 [Oryza sativa]gb AAV32218.1  cytoplasmic ribosomal protein L18 [Oryza sativa (japonica cultivar-group)]                                                                                                                                                                                                                                                                           | 188   | 6E-63   |
|                       |                 |                     |                          |                     | >gb AAW50985.1  ribosomal protein L18 [Triticum aestivum]                                                                                                                                                                                                                                                                                                                                                                             | 188   | 6E-61   |
|                       |                 |                     |                          |                     | >ref XP_479492.1  putative cytoplasmic ribosomal protein L18 [Oryza sativa (japonica cultivar-group)] dbj BAD31974.1  putative cytoplasmic ribosomal protein L18 [Oryza sativa (japonica cultivar-group)] dbj BAC83538.1  putative cytoplasmic ribosomal protein L18 [Oryza sativa (japonica cultivar-group)]                                                                                                                         | 195   | 1E-57   |
|                       |                 |                     |                          |                     | >gb AAA69928.1  cytoplasmic ribosomal protein L18                                                                                                                                                                                                                                                                                                                                                                                     | 187   | 5E-55   |
|                       |                 |                     |                          |                     | >ref NP_187210.1  RPL18 (RIBOSOMAL PROTEIN L18); structural constituent of ribosome[Arabidopsis thaliana] gb AAF26138.1  putative 60S ribosomal protein L18 [Arabidopsis thaliana] gb AAL31164.1  AT3g05590/F18C1_14 [Arabidopsis thaliana] gb AAK59824.1  AT3g05590/F18C1_14 [Arabidopsis thaliana] sp P42791 RL18 ARATH 60S ribosomal protein L18                                                                                   | 187   | 5E-55   |
| DV490274              | 1.39E-03        | Mo17<B73=F1         | 1.61                     | 10                  | >gb AAF23902.1  MAP kinase homolog [Oryza sativa]dbj BAD53617.1  MAP kinase [Oryza sativa (japonica cultivar-group)]                                                                                                                                                                                                                                                                                                                  | 506   | 1E-32   |
|                       |                 |                     |                          |                     | >dbj BAD53616.1  putative MAP kinase [Oryza sativa (japonica cultivar-group)]                                                                                                                                                                                                                                                                                                                                                         | 580   | 1E-32   |
|                       |                 |                     |                          |                     | >gb AAD52659.1  blast and wounding induced mitogen-activated protein kinase [Oryzasativa]                                                                                                                                                                                                                                                                                                                                             | 506   | 1E-32   |
|                       |                 |                     |                          |                     | >gb AAX20165.1  putative MAPK protein kinase [Triticum aestivum]                                                                                                                                                                                                                                                                                                                                                                      | 578   | 1E-28   |
|                       |                 |                     |                          |                     | >gb AAX20166.1  putative MAPK protein kinase [Triticum aestivum]                                                                                                                                                                                                                                                                                                                                                                      | 578   | 5E-28   |
| CB605044              | 1.42E-03        | B73<F1=Mo17         | 1.42                     | 3                   | >ref XP_464969.1  putative 60S ribosomal protein L27 [Oryza sativa (japonica cultivar-group)] dbj BAD22201.1  putative 60S ribosomal protein L27 [Oryza sativa (japonica cultivar-group)] dbj BAD21487.1  putative 60S ribosomal protein L27 [Oryza sativa (japonica cultivar-group)]                                                                                                                                                 | 137   | 9E-72   |
|                       |                 |                     |                          |                     | >ref NP_922757.1  putative ribosomal protein L27 [Oryza sativa (japonica cultivar-group)] gb AAG60203.1  putative ribosomal protein L27 [Oryza sativa]                                                                                                                                                                                                                                                                                | 136   | 5E-68   |
|                       |                 |                     |                          |                     | gb AAP55044.1  ribosomal protein L27, putative [Oryza sativa (japonica cultivar-group)]                                                                                                                                                                                                                                                                                                                                               | 135   | 5E-57   |
|                       |                 |                     |                          |                     | >ref NP_193236.1  structural constituent of ribosome [Arabidopsis thaliana]emb CAB10279.1  ribosomal protein [Arabidopsis thaliana] gb AAM20365.1  putative ribosomal protein [Arabidopsis thaliana] gb AAL36343.1  putative ribosomal protein [Arabidopsis thaliana] gb AAM62713.1  ribosomal protein [Arabidopsis thaliana] emb CAB78542.1  ribosomal protein [Arabidopsis thaliana] sp P51419 RL27 ARATH 60S ribosomal protein L27 | 135   | 5E-56   |
|                       |                 |                     |                          |                     | >dbj BAA96367.1  ribosomal protein L27 [Panax ginseng]                                                                                                                                                                                                                                                                                                                                                                                | 135   | 5E-56   |
|                       |                 |                     |                          |                     | >ref NP_188862.1  structural constituent of ribosome [Arabidopsis thaliana]gb AAN15737.1  putative ribosomal protein L27 [Arabidopsis thaliana]                                                                                                                                                                                                                                                                                       | 135   | 5E-56   |
|                       |                 |                     |                          |                     | gb AAM14157.1  putative ribosomal protein L27 [Arabidopsis thaliana] gb AAL36216.1  putative ribosomal protein L27 [Arabidopsis thaliana] gb AAM96987.1  putative ribosomal protein L27 [Arabidopsis thaliana] gb AAM13388.1  60S ribosomal protein L27 [Arabidopsis thaliana] gb AAL32695.1  60S ribosomal protein L27 [Arabidopsis thaliana] dbj BAB03070.1  60S ribosomal protein L27 [Arabidopsis thaliana]                       | 135   | 7E-56   |



**Table 4. Microarray analysis results, mode of gene action classification, and BLAST annotation for the 1,367 ESTs identified as differentially expressed among genotypes (15% FDR)**

| GenBank accession no. | Overall P value | Significant pattern | Fold change <sup>†</sup> | Sector <sup>‡</sup> | BLAST annotation*                                                                                                                                                                                                                                                                                                                                                                                                                                                                                                                                                                                                                                         | Score | E value |
|-----------------------|-----------------|---------------------|--------------------------|---------------------|-----------------------------------------------------------------------------------------------------------------------------------------------------------------------------------------------------------------------------------------------------------------------------------------------------------------------------------------------------------------------------------------------------------------------------------------------------------------------------------------------------------------------------------------------------------------------------------------------------------------------------------------------------------|-------|---------|
| CD568516              | 1.47E-03        | F1=Mo17<B73         | 1.39                     | 9                   | >gb AAX55895.1  aci-reductone dioxygenase-like protein [Oryza sativa (japonicacultivar-group)]                                                                                                                                                                                                                                                                                                                                                                                                                                                                                                                                                            | 198   | 1E-80   |
|                       |                 |                     |                          |                     | >gb AAC19375.1  acireductone dioxygenase 2 [Oryza sativa]                                                                                                                                                                                                                                                                                                                                                                                                                                                                                                                                                                                                 | 198   | 1E-80   |
|                       |                 |                     |                          |                     | >dbj BAB61039.1  iron-deficiency induced gene [Hordeum vulgare]                                                                                                                                                                                                                                                                                                                                                                                                                                                                                                                                                                                           | 198   | 1E-76   |
|                       |                 |                     |                          |                     | >gb AAN06863.1  Putative probable submergence induced, nickel-binding protein 2A[Oryza sativa (japonica cultivar-group)]                                                                                                                                                                                                                                                                                                                                                                                                                                                                                                                                  | 254   | 3E-76   |
|                       |                 |                     |                          |                     | >gb AAC05511.1  acireductone dioxygenase 1 [Oryza sativa]                                                                                                                                                                                                                                                                                                                                                                                                                                                                                                                                                                                                 | 199   | 5E-75   |
| CB381074              | 1.47E-03        | Mo17<B73=F1         | 1.37                     | 10                  | >ref XP_480842.1  putative 60S ribosomal protein L7 [Oryza sativa (japonicacultivar-group)] dbj BAD03800.1  putative 60S ribosomal protein L7 [Oryza sativa (japonica cultivar-group)]                                                                                                                                                                                                                                                                                                                                                                                                                                                                    | 245   | 2E-69   |
|                       |                 |                     |                          |                     | >gb AAW50989.1  ribosomal protein L7 [Triticum aestivum]                                                                                                                                                                                                                                                                                                                                                                                                                                                                                                                                                                                                  | 244   | 5E-69   |
|                       |                 |                     |                          |                     | >ref XP_473801.1  OSJNBb0015N08.13 [Oryza sativa (japonica cultivar-group)]emb CAE03885.2  OSJNBb0015N08.13 [Oryza sativa (japonica cultivar-group)]                                                                                                                                                                                                                                                                                                                                                                                                                                                                                                      | 250   | 4E-68   |
|                       |                 |                     |                          |                     | emb CAE02124.2  OSJNBa0035M09.3 [Oryza sativa (japonica cultivar-group)]                                                                                                                                                                                                                                                                                                                                                                                                                                                                                                                                                                                  | 247   | 3E-62   |
|                       |                 |                     |                          |                     | >ref NP_850411.1  structural constituent of ribosome / transcription regulator[Arabidopsis thaliana] gb AAC23430.1  60S ribosomal protein L7 [Arabidopsis thaliana] pir T00692 60S ribosomal protein L7 [imported] - Arabidopsis thaliana                                                                                                                                                                                                                                                                                                                                                                                                                 | 247   | 3E-62   |
|                       |                 |                     |                          |                     | >ref NP_850410.1  structural constituent of ribosome / transcription regulator[Arabidopsis thaliana] gb AAM10036.1  60S ribosomal protein L7 [Arabidopsis thaliana] gb AAL38372.1  60S ribosomal protein L7 [Arabidopsis thaliana] gb AAL38617.1  At2g44120/F6E13.25 [Arabidopsis thaliana] gb AAK96628.1  At2g44120/F6E13.25 [Arabidopsis thaliana] gb AAM65125.1  60S ribosomal protein L7 [Arabidopsis thaliana] sp P60039 RL72_ARATH 60S ribosomal protein L7-2                                                                                                                                                                                       | 242   | 3E-62   |
|                       |                 |                     |                          |                     | ns                                                                                                                                                                                                                                                                                                                                                                                                                                                                                                                                                                                                                                                        |       |         |
| DV491346              | 1.48E-03        | F1=Mo17<B73         | 5.3                      | 8                   | ns                                                                                                                                                                                                                                                                                                                                                                                                                                                                                                                                                                                                                                                        |       |         |
| DV942317              | 1.48E-03        | F1=Mo17<B73         | 1.72                     | 9                   | >dbj BAD87076.1  putative ribosomal protein S26 [Oryza sativa (japonicacultivar-group)] dbj BAD73505.1  putative ribosomal protein S26 [Oryza sativa (japonica cultivar-group)]                                                                                                                                                                                                                                                                                                                                                                                                                                                                           | 133   | 5E-33   |
|                       |                 |                     |                          |                     | >ref XP_475416.1  putative 40S ribosomal protein S26 [Oryza sativa (japonicacultivar-group)] gb AAT01360.1  putative 40S ribosomal protein S26 [Oryza sativa (japonica cultivar-group)]                                                                                                                                                                                                                                                                                                                                                                                                                                                                   | 194   | 9E-33   |
|                       |                 |                     |                          |                     | >sp P49216 RS26 ORYSA 40S ribosomal protein S26 (S31)dbj BAA07208.1  ribosomal protein S31 [Oryza sativa (japonica cultivar-group)]                                                                                                                                                                                                                                                                                                                                                                                                                                                                                                                       | 133   | 8E-32   |
|                       |                 |                     |                          |                     | >gb AAD47346.1  ribosomal protein S26 [Pisum sativum]                                                                                                                                                                                                                                                                                                                                                                                                                                                                                                                                                                                                     | 130   | 2E-27   |
|                       |                 |                     |                          |                     | >ref NP_191193.1  structural constituent of ribosome [Arabidopsis thaliana]emb CAB87433.1  40S ribosomal protein S26 homolog [Arabidopsis thaliana] gb AAM91494.1  AT3g56340/F18O21 300 [Arabidopsis thaliana] gb AAK63990.1  AT3g56340/F18O21 300 [Arabidopsis thaliana]                                                                                                                                                                                                                                                                                                                                                                                 | 130   | 2E-26   |
| BG874137              | 1.48E-03        | Mo17<B73=F1         | 1.86                     | 10                  | ns                                                                                                                                                                                                                                                                                                                                                                                                                                                                                                                                                                                                                                                        |       |         |
| CB351321              | 1.49E-03        | F1=Mo17<B73         | 3.12                     | 9                   | >ref XP_464091.1  putative molybdopterin synthase large subunit MOCS2B [Oryza sativa(japonica cultivar-group)] dbj BAD10257.1  putative molybdopterin synthase large subunit MOCS2B [Oryza sativa (japonica cultivar-group)]                                                                                                                                                                                                                                                                                                                                                                                                                              | 193   | 2E-25   |
|                       |                 |                     |                          |                     | >ref NP_181904.1  unknown protein [Arabidopsis thaliana]emb CAB71291.1  molybdopterin synthase, large subunit [Arabidopsis thaliana] emb CAB38428.1  molybdopterin synthase large subunit [Arabidopsis thaliana] gb AAB64030.1  putative molybdopterin synthase large subunit [Arabidopsis thaliana] gb AAK32854.1  At2g43760/F18O19.13 [Arabidopsis thaliana] gb AAN64517.1  At2g43760/F18O19.13 [Arabidopsis thaliana]                                                                                                                                                                                                                                  | 198   | 1E-17   |
|                       |                 |                     |                          |                     | >emb CAD80090.1  putative molybdopterin synthase large subunit [Momordica charantia]                                                                                                                                                                                                                                                                                                                                                                                                                                                                                                                                                                      | 110   | 4E-16   |
|                       |                 |                     |                          |                     | >gb AAT43644.1  molybdopterin (MPT) converting factor, subunit 2 [Picrophilustorridus DSM 9790] ref YP_023837.1  molybdopterin (MPT) converting factor, subunit 2 [Picrophilus torridus DSM 9790]                                                                                                                                                                                                                                                                                                                                                                                                                                                         | 137   | 4E-12   |
|                       |                 |                     |                          |                     | >ref NP_004522.1  molybdopterin synthase large subunit MOCS2B [Homo sapiens]ref NP_904327.1  molybdopterin synthase large subunit MOCS2B [Homo sapiens] gb AAH46097.1  Molybdopterin synthase, large subunit MOCS2B [Homo sapiens] emb CAG33453.1  MOCS2 [Homo sapiens] gb AAD14599.1  molybdopterin-synthase large subunit [Homo sapiens] gb AAF67478.1  molybdenum cofactor biosynthesis protein E [Homo sapiens] gb AAD13297.1  molybdopterin synthase large subunit [Homo sapiens] sp O96007 MOS2L_HUMAN Molybdenum cofactor synthesis protein 2 large subunit (Molybdopterin synthase large subunit) (MPT synthase large subunit) (MOCS2B) (MOCO1-B) | 188   | 2E-11   |
|                       |                 |                     |                          |                     | >ref XP_478414.1  putative translational inhibitor protein [Oryza sativa (japonicacultivar-group)] dbj BAC20708.1  putative translational inhibitor protein [Oryza sativa (japonica cultivar-group)]                                                                                                                                                                                                                                                                                                                                                                                                                                                      | 180   | 6E-56   |
|                       |                 |                     |                          |                     | >dbj BAD00048.1  perchloric acid soluble translation inhibitor protein homolog[Gentiana triflora] dbj BAC66487.1  translation-inhibitor protein [Gentiana triflora]                                                                                                                                                                                                                                                                                                                                                                                                                                                                                       | 188   | 9E-52   |
| CB381184              | 1.50E-03        | Mo17<B73=F1         | 1.21                     | 10                  | >ref NP_188674.1  endoribonuclease [Arabidopsis thaliana]gb AAK53030.1  AT3g20390/MQC12_15 [Arabidopsis thaliana] gb AAL31178.1  AT3g20390/MQC12 15 [Arabidopsis thaliana] gb AAM63246.1  translational inhibitor protein, putative [Arabidopsis thaliana]                                                                                                                                                                                                                                                                                                                                                                                                | 187   | 2E-50   |
|                       |                 |                     |                          |                     | >dbj BAB02821.1  unnamed protein product [Arabidopsis thaliana]                                                                                                                                                                                                                                                                                                                                                                                                                                                                                                                                                                                           | 143   | 2E-50   |
|                       |                 |                     |                          |                     | >gb AAY18881.1  translational inhibitor protein p14.5 [synthetic construct]                                                                                                                                                                                                                                                                                                                                                                                                                                                                                                                                                                               | 161   | 4E-32   |
|                       |                 |                     |                          |                     | >sp Q10716 CYSP1 MAIZE Cysteine proteinase 1 precursordbj BAA08244.1  cysteine proteinase [Zea mays]                                                                                                                                                                                                                                                                                                                                                                                                                                                                                                                                                      | 371   | 2E-89   |
|                       |                 |                     |                          |                     | >ref XP_507484.1  PREDICTED OJ1371_D04.6 gene product [Oryza sativa (japonicacultivar-group)] ref XP_507483.1  PREDICTED OJ1371_D04.6 gene product [Oryza sativa (japonica cultivar-group)] ref XP_465566.1  putative cysteine proteinase 1 precursor [Oryza sativa (japonica cultivar-group)] ref XP_507482.1  PREDICTED OJ1371_D04.6 gene product [Oryza sativa (japonica cultivar-group)] ref XP_506801.1  PREDICTED OJ1371_D04.6 gene product [Oryza sativa (japonica cultivar-group)] dbj BAD19579.1  putative cysteine proteinase 1 precursor [Oryza sativa (japonica cultivar-group)]                                                              | 373   | 1E-82   |
| DV551123              | 1.50E-03        | Mo17<B73=F1         | 1.53                     | 10                  | >emb CAA57675.1  cysteine proteinase [Zea mays]                                                                                                                                                                                                                                                                                                                                                                                                                                                                                                                                                                                                           | 145   | 9E-81   |
|                       |                 |                     |                          |                     | >tpe CAD66657.1  TPA: putative cysteine protease [Hordeum vulgare subsp. vulgare]                                                                                                                                                                                                                                                                                                                                                                                                                                                                                                                                                                         | 377   | 1E-79   |
|                       |                 |                     |                          |                     | >gb AAW21813.1  cysteine protease [Triticum aestivum]                                                                                                                                                                                                                                                                                                                                                                                                                                                                                                                                                                                                     | 377   | 2E-79   |
|                       |                 |                     |                          |                     |                                                                                                                                                                                                                                                                                                                                                                                                                                                                                                                                                                                                                                                           |       |         |

**Table 4. Microarray analysis results, mode of gene action classification, and BLAST annotation for the 1,367 ESTs identified as differentially expressed among genotypes (15% FDR)**

| GenBank accession no. | Overall P value | Significant pattern | Fold change <sup>†</sup> | Sector <sup>‡</sup> | BLAST annotation*                                                                                                                                                                                                                                                                                                                                                                                                                                                                                                                                                                                                                                                                                                                             | Score | E value |
|-----------------------|-----------------|---------------------|--------------------------|---------------------|-----------------------------------------------------------------------------------------------------------------------------------------------------------------------------------------------------------------------------------------------------------------------------------------------------------------------------------------------------------------------------------------------------------------------------------------------------------------------------------------------------------------------------------------------------------------------------------------------------------------------------------------------------------------------------------------------------------------------------------------------|-------|---------|
| BM349941              | 1.51E-03        | F1=Mo17<B73         | 1.58                     | 9                   | >gb AAG34830.1  glutathione S-transferase GST 22 [Zea mays]                                                                                                                                                                                                                                                                                                                                                                                                                                                                                                                                                                                                                                                                                   | 229   | 2E-22   |
|                       |                 |                     |                          |                     | >gb AAG34845.1  glutathione S-transferase GST 37 [Zea mays]                                                                                                                                                                                                                                                                                                                                                                                                                                                                                                                                                                                                                                                                                   | 236   | 3E-10   |
|                       |                 |                     |                          |                     | >gb AAM83401.1  glutathione-S-transferase 28e45 [Triticum aestivum]                                                                                                                                                                                                                                                                                                                                                                                                                                                                                                                                                                                                                                                                           | 228   | 6E-7    |
|                       |                 |                     |                          |                     | >gb AAM89393.1  glutathione S-transferase 1 [Aegilops tauschii] gb AAD10129.1  glutathione S-transferase TSI-1 [Aegilops tauschii] pdb 1GWC C Chain C, The Structure Of A Tau Class Glutathione S-Transferase From Wheat, Active In Herbicide Detoxification pdb 1GWC B Chain B, The Structure Of A Tau Class Glutathione S-Transferase From Wheat, Active In Herbicide Detoxification                                                                                                                                                                                                                                                                                                                                                        | 230   | 6E-7    |
|                       |                 |                     |                          |                     | >ref XP_476737.1  putative glutathione S-transferase GST27 [Oryza sativa (japonica cultivar-group)] ref XP_506181.1  PREDICTED OSJNBa0050F10.6 gene product [Oryza sativa (japonica cultivar-group)] dbj BAD31777.1  putative glutathione S-transferase GST27 [Oryza sativa (japonica cultivar-group)]                                                                                                                                                                                                                                                                                                                                                                                                                                        | 235   | 8E-7    |
| CB604806              | 1.52E-03        | Mo17<B73=F1         | 1.29                     | 10                  | ns                                                                                                                                                                                                                                                                                                                                                                                                                                                                                                                                                                                                                                                                                                                                            |       |         |
| DV551233              | 1.52E-03        | Mo17<B73=F1         | 1.75                     | 11                  | >ref NP_911744.1  unknown protein [Oryza sativa (japonica cultivar-group)]ref XP_506244.1  PREDICTED P0021G06.122-2 gene product [Oryza sativa (japonica cultivar-group)] dbj BAC20822.1  unknown protein [Oryza sativa (japonica cultivar-group)] dbj BAC20124.1  unknown protein [Oryza sativa (japonica cultivar-group)]                                                                                                                                                                                                                                                                                                                                                                                                                   | 107   | 1E-21   |
|                       |                 |                     |                          |                     | >ref NP_190014.1  unknown protein [Arabidopsis thaliana] emb CAB88996.1  putative protein [Arabidopsis thaliana] gb AAN60290.1  unknown [Arabidopsis thaliana] gb AAO64023.1  unknown protein [Arabidopsis thaliana] dbj BAC42815.1  unknown protein [Arabidopsis thaliana]                                                                                                                                                                                                                                                                                                                                                                                                                                                                   | 108   | 1E-13   |
|                       |                 |                     |                          |                     | >ref NP_197620.1  unknown protein [Arabidopsis thaliana] gb AAL32901.1  Unknown protein [Arabidopsis thaliana] gb AAP21319.1  At5g22280 [Arabidopsis thaliana] gb AAM66072.1  unknown [Arabidopsis thaliana] dbj BAB08326.1  unnamed protein product [Arabidopsis thaliana]                                                                                                                                                                                                                                                                                                                                                                                                                                                                   | 108   | 2E-13   |
|                       |                 |                     |                          |                     | >gb AAO41143.1  unknown protein, 3'-partial [Oryza sativa (japonica cultivar-group)]                                                                                                                                                                                                                                                                                                                                                                                                                                                                                                                                                                                                                                                          | 53    | 1E-10   |
|                       |                 |                     |                          |                     | >dbj BAD27808.1  unknown protein [Oryza sativa (japonica cultivar-group)]                                                                                                                                                                                                                                                                                                                                                                                                                                                                                                                                                                                                                                                                     | 106   | 7E-7    |
| CB381189              | 1.52E-03        | F1=Mo17<B73         | 1.33                     | 9                   | >ref XP_464689.1  putative elongation factor 1-gamma [Oryza sativa (japonica cultivar-group)] dbj BAD17614.1  putative elongation factor 1-gamma [Oryza sativa (japonica cultivar-group)]                                                                                                                                                                                                                                                                                                                                                                                                                                                                                                                                                     | 414   | 6E-76   |
|                       |                 |                     |                          |                     | >gb ABA81876.1  unknown [Solanum tuberosum]                                                                                                                                                                                                                                                                                                                                                                                                                                                                                                                                                                                                                                                                                                   | 413   | 1E-67   |
|                       |                 |                     |                          |                     | >gb ABB87108.1  putative elongation factor 1-gamma-like [Solanum tuberosum]                                                                                                                                                                                                                                                                                                                                                                                                                                                                                                                                                                                                                                                                   | 414   | 1E-67   |
|                       |                 |                     |                          |                     | >gb AAL87298.1  unknown protein [Arabidopsis thaliana]                                                                                                                                                                                                                                                                                                                                                                                                                                                                                                                                                                                                                                                                                        | 345   | 2E-67   |
|                       |                 |                     |                          |                     | >gb AAO72574.1  elongation factor 1 gamma-like protein [Oryza sativa (japonica cultivar-group)]                                                                                                                                                                                                                                                                                                                                                                                                                                                                                                                                                                                                                                               | 409   | 1E-38   |
| DV550388              | 1.53E-03        | Mo17<B73=F1         | 1.58                     | 10                  | >ref XP_478466.1  putative glucose-6-phosphate/phosphate-translocator precursor [Oryza sativa (japonica cultivar-group)] ref XP_478462.1  putative glucose-6-phosphate/phosphate-translocator precursor [Oryza sativa (japonica cultivar-group)] ref XP_478458.1  putative glucose-6-phosphate/phosphate-translocator precursor [Oryza sativa (japonica cultivar-group)] dbj BAC57677.1  putative glucose-6-phosphate/phosphate-translocator precursor [Oryza sativa (japonica cultivar-group)] dbj BAC57673.1  putative glucose-6-phosphate/phosphate-translocator precursor [Oryza sativa (japonica cultivar-group)] dbj BAD30854.1  putative glucose-6-phosphate/phosphate-translocator precursor [Oryza sativa (japonica cultivar-group)] | 392   | 2E-13   |
|                       |                 |                     |                          |                     | >dbj BAD94591.1  Similar to glucose-6-phosphate/phosphate-translocator [Arabidopsis thaliana]                                                                                                                                                                                                                                                                                                                                                                                                                                                                                                                                                                                                                                                 | 110   | 5E-13   |
|                       |                 |                     |                          |                     | >ref NP_564785.1  antiporter/ glucose-6-phosphate transporter [Arabidopsis thaliana]                                                                                                                                                                                                                                                                                                                                                                                                                                                                                                                                                                                                                                                          | 388   | 5E-13   |
|                       |                 |                     |                          |                     | >gb AAM10041.1  similar to glucose-6-phosphate/phosphate-translocator [Arabidopsis thaliana] gb AAK68814.1  Similar to glucose-6-phosphate/phosphate-translocator [Arabidopsis thaliana] sp Q94B38 GPT2 ARATH Glucose-6-phosphate/phosphate translocator 2, chloroplast precursor                                                                                                                                                                                                                                                                                                                                                                                                                                                             | 388   | 5E-13   |
|                       |                 |                     |                          |                     | >gb AAF86908.1  glucose-6P/phosphate translocator precursor [Mesembryanthemum crystallinum]                                                                                                                                                                                                                                                                                                                                                                                                                                                                                                                                                                                                                                                   | 395   | 6E-13   |
| CB886023              | 1.53E-03        | Mo17<B73=F1         | 1.76                     | 10                  | ns                                                                                                                                                                                                                                                                                                                                                                                                                                                                                                                                                                                                                                                                                                                                            |       |         |
| BM336116              | 1.55E-03        | Mo17<B73=F1         | 2.68                     | 10                  | >ref NP_913526.1  unnamed protein product [Oryza sativa (japonica cultivar-group)]dbj BAA96586.1  putative SDL-1 protein [Oryza sativa (japonica cultivar-group)]                                                                                                                                                                                                                                                                                                                                                                                                                                                                                                                                                                             | 556   | 3E-11   |
|                       |                 |                     |                          |                     | >ref XP_474136.1  OSJNBb0059K02.13 [Oryza sativa (japonica cultivar-group)]emb CAE04503.1  OSJNBb0059K02.13 [Oryza sativa (japonica cultivar-group)]                                                                                                                                                                                                                                                                                                                                                                                                                                                                                                                                                                                          | 464   | 1E-39   |
|                       |                 |                     |                          |                     | >ref NP_201525.2  exonuclease [Arabidopsis thaliana] gb AAL87318.1  unknown protein [Arabidopsis thaliana] gb AAN71976.1  unknown protein [Arabidopsis thaliana]                                                                                                                                                                                                                                                                                                                                                                                                                                                                                                                                                                              | 782   | 2E-22   |
|                       |                 |                     |                          |                     | >ref NP_190579.1  exonuclease [Arabidopsis thaliana] emb CAB62118.1  hypothetical protein [Arabidopsis thaliana]                                                                                                                                                                                                                                                                                                                                                                                                                                                                                                                                                                                                                              | 406   | 3E-21   |
|                       |                 |                     |                          |                     | >dbj BAB10958.1  unnamed protein product [Arabidopsis thaliana]                                                                                                                                                                                                                                                                                                                                                                                                                                                                                                                                                                                                                                                                               | 782   | 4E-21   |
| CD510425              | 1.60E-03        | B73<F1<Mo17         | 1.38                     | 3                   | >ref NP_196173.1  exonuclease [Arabidopsis thaliana] gb AAP81803.1  At5g05540 [Arabidopsis thaliana] dbj BAB11543.1  unnamed protein product [Arabidopsis thaliana] dbj BAC43046.1  unknown protein [Arabidopsis thaliana]                                                                                                                                                                                                                                                                                                                                                                                                                                                                                                                    | 466   | 3E-19   |
|                       |                 |                     |                          |                     | >emb CAE52517.1  beta tubulin [Setaria viridis]                                                                                                                                                                                                                                                                                                                                                                                                                                                                                                                                                                                                                                                                                               | 448   | 2E-63   |
|                       |                 |                     |                          |                     | >ref NP_912523.1  Putative beta tubulin [Oryza sativa (japonica cultivar-group)]gb AAN60482.1  Putative beta tubulin [Oryza sativa (japonica cultivar-group)] sp Q8H7U1 TBB2 ORYSA Tubulin beta-2 chain (Beta-2 tubulin)                                                                                                                                                                                                                                                                                                                                                                                                                                                                                                                      | 447   | 2E-63   |
|                       |                 |                     |                          |                     | >emb CAA37060.1  beta 1 tubulin [Zea mays] sp P18025 TBB1 MAIZE Tubulin beta-1 chain (Beta-1 tubulin)                                                                                                                                                                                                                                                                                                                                                                                                                                                                                                                                                                                                                                         | 446   | 1E-62   |
|                       |                 |                     |                          |                     | >gb AAL92118.1  beta-tubulin [Gossypium hirsutum] gb AAL92026.1  tubulin beta-1 [Gossypium hirsutum]                                                                                                                                                                                                                                                                                                                                                                                                                                                                                                                                                                                                                                          | 445   | 2E-62   |
| CB605418              | 1.61E-03        | Mo17<B73=F1         | 1.41                     | 11                  | >gb AAQ92668.1  beta-tubulin 9 [Gossypium hirsutum] sp Q6VAF4 TBB9 GOSHI Tubulin beta-9 chain (Beta-9 tubulin)                                                                                                                                                                                                                                                                                                                                                                                                                                                                                                                                                                                                                                | 445   | 2E-62   |
|                       |                 |                     |                          |                     | >ref NP_564138.1  protein transporter [Arabidopsis thaliana] gb AAL34154.1  unknown protein [Arabidopsis thaliana] gb AAK59479.1  unknown protein [Arabidopsis thaliana] gb AAF87893.1  Unknown protein [Arabidopsis thaliana]                                                                                                                                                                                                                                                                                                                                                                                                                                                                                                                | 506   | 2E-50   |

**Table 4. Microarray analysis results, mode of gene action classification, and BLAST annotation for the 1,367 ESTs identified as differentially expressed among genotypes (15% FDR)**

| GenBank accession no. | Overall P value | Significant pattern | Fold change <sup>†</sup> | Sector <sup>‡</sup> | BLAST annotation*                                                                                                                                                                                                                                                                                                                                                                                               | Score | E value |
|-----------------------|-----------------|---------------------|--------------------------|---------------------|-----------------------------------------------------------------------------------------------------------------------------------------------------------------------------------------------------------------------------------------------------------------------------------------------------------------------------------------------------------------------------------------------------------------|-------|---------|
|                       |                 |                     |                          |                     | >ref NP_177823.2  protein transporter [Arabidopsis thaliana]gb AAQ62873.1  At1g76970 [Arabidopsis thaliana] dbj BAD94203.1  hypothetical protein [Arabidopsis thaliana]                                                                                                                                                                                                                                         | 446   | 5E-49   |
|                       |                 |                     |                          |                     | >gb ABB90835.1  VHS and GAT domain protein [Glycine max]                                                                                                                                                                                                                                                                                                                                                        | 672   | 4E-45   |
|                       |                 |                     |                          |                     | >ref XP_464916.1  putative VHS domain-containing protein [Oryza sativa (japonica cultivar-group)] dbj BAD28297.1  putative VHS domain-containing protein [Oryza sativa (japonica cultivar-group)] dbj BAD21829.1  putative VHS domain-containing protein [Oryza sativa (japonica cultivar-group)]                                                                                                               | 634   | 1E-43   |
|                       |                 |                     |                          |                     | >gb AAAX96736.1  VHS domain [Oryza sativa (japonica cultivar-group)]gb ABA91946.1  VHS domain [Oryza sativa (japonica cultivar-group)]                                                                                                                                                                                                                                                                          | 109   | 5E-43   |
| CD661814              | 1.63E-03        | Mo17<B73=F1         | 1.34                     | 10                  | >emb CAA48638.1  cyclophilin [Zea mays]sp P21569 CYPH_MAIZE Peptidyl-prolyl cis-trans isomerase (PPIase) (Rotamase) (Cyclophilin) (Cyclosporin A-binding protein) gb AAA63403.1  cyclophilin                                                                                                                                                                                                                    | 172   | 6E-49   |
|                       |                 |                     |                          |                     | >gb AAK60569.1  cyclophilin [Triticum aestivum]                                                                                                                                                                                                                                                                                                                                                                 | 131   | 7E-41   |
|                       |                 |                     |                          |                     | >gb AAK49428.1  cyclophilin A-3 [Triticum aestivum]gb AAK49426.1  cyclophilin A-1 [Triticum aestivum]                                                                                                                                                                                                                                                                                                           | 171   | 2E-40   |
|                       |                 |                     |                          |                     | >gb AAK49427.1  cyclophilin A-2 [Triticum aestivum]gb AAS17067.1  cyclophilin A [Triticum aestivum]                                                                                                                                                                                                                                                                                                             | 171   | 2E-40   |
|                       |                 |                     |                          |                     | >ref XP_463914.1  peptidylprolyl isomerase Cyp2 [Oryza sativa (japonica cultivar-group)] ref XP_506694.1  PREDICTED OSJNBb0088N06.23 gene product [Oryza sativa (japonica cultivar-group)] dbj BAD07601.1  peptidylprolyl isomerase Cyp2 [Oryza sativa (japonica cultivar-group)] dbj BAD08141.1  peptidylprolyl isomerase Cyp2 [Oryza sativa (japonica cultivar-group)] gb AAA57045.1  cyclophilin 2           | 172   | 3E-40   |
| DV491731              | 1.63E-03        | Mo17<B73=F1         | 1.84                     | 10                  | ns                                                                                                                                                                                                                                                                                                                                                                                                              |       |         |
| BM341661              | 1.63E-03        | Mo17<B73=F1         | 1.35                     | 10                  | >emb CAJ01693.1  2-Cys peroxiredoxin [Oryza sativa (japonica cultivar-group)]dbj BAD27915.1  putative thioredoxin peroxidase [Oryza sativa (japonica cultivar-group)] dbj BAD28826.1  putative thioredoxin peroxidase [Oryza sativa (japonica cultivar-group)]                                                                                                                                                  | 261   | 5E-77   |
|                       |                 |                     |                          |                     | >gb AAC78473.1  thioredoxin peroxidase [Secale cereale]                                                                                                                                                                                                                                                                                                                                                         | 258   | 2E-75   |
|                       |                 |                     |                          |                     | >ref NP_568166.1  antioxidant [Arabidopsis thaliana]gb AAK00375.1  putative 2-cys peroxiredoxin protein [Arabidopsis thaliana] gb AAG41453.1  putative 2-cys peroxiredoxin protein [Arabidopsis thaliana] gb AAM10065.1  2-cys peroxiredoxin-like protein [Arabidopsis thaliana] gb AAK96812.1  2-cys peroxiredoxin-like protein [Arabidopsis thaliana]                                                         | 273   | 3E-75   |
|                       |                 |                     |                          |                     | >gb AAM62760.1  2-cys peroxiredoxin-like protein [Arabidopsis thaliana]                                                                                                                                                                                                                                                                                                                                         | 271   | 3E-75   |
|                       |                 |                     |                          |                     | >dbj BAB08951.1  2-cys peroxiredoxin-like protein [Arabidopsis thaliana]                                                                                                                                                                                                                                                                                                                                        | 271   | 3E-75   |
| BM073059              | 1.65E-03        | F1=Mo17<B73         | 1.37                     | 9                   | >gb AAQ84317.1  fiber NTGP1-related protein [Gossypium barbadense]                                                                                                                                                                                                                                                                                                                                              | 199   | 1E-28   |
|                       |                 |                     |                          |                     | >dbj BAD81915.1  putative geranylgeranylated protein NTGP1 [Oryza sativa (japonica cultivar-group)]                                                                                                                                                                                                                                                                                                             | 216   | 1E-28   |
|                       |                 |                     |                          |                     | >dbj BAD87240.1  putative NTGP1 [Oryza sativa (japonica cultivar-group)]                                                                                                                                                                                                                                                                                                                                        | 214   | 5E-28   |
|                       |                 |                     |                          |                     | >gb AAT37501.1  putative SNARE protein [Hevea brasiliensis]                                                                                                                                                                                                                                                                                                                                                     | 199   | 1E-27   |
|                       |                 |                     |                          |                     | >gb AAD00116.1  NTGP1 [Nicotiana tabacum]                                                                                                                                                                                                                                                                                                                                                                       | 199   | 1E-27   |
| DV491495              | 1.66E-03        | Mo17<B73=F1         | 1.45                     | 10                  | >gb AAW34236.1  putative ribosomal protein S19 [Oryza sativa (japonica cultivar-group)]                                                                                                                                                                                                                                                                                                                         | 166   | 4E-19   |
|                       |                 |                     |                          |                     | >ref XP_468756.1  putative ribosomal protein S19 [Oryza sativa (japonica cultivar-group)] ref XP_468752.1  putative ribosomal protein S19 [Oryza sativa (japonica cultivar-group)] gb AAP20855.1  putative ribosomal protein S19 [Oryza sativa (japonica cultivar-group)] gb AAP20842.1  putative ribosomal protein S19 [Oryza sativa (japonica cultivar-group)] sp P40978 RS19 ORYSA 40S ribosomal protein S19 | 146   | 4E-19   |
|                       |                 |                     |                          |                     | >gb AAW34237.1  putative ribosomal protein S19 [Oryza sativa (japonica cultivar-group)]                                                                                                                                                                                                                                                                                                                         | 144   | 3E-16   |
|                       |                 |                     |                          |                     | >ref NP_186857.1  structural constituent of ribosome [Arabidopsis thaliana]gb AAF14828.1  putative 40S ribosomal protein S19 [Arabidopsis thaliana]                                                                                                                                                                                                                                                             |       |         |
|                       |                 |                     |                          |                     | gb AAL34186.1  putative 40S ribosomal protein S19 [Arabidopsis thaliana] gb AAK44092.1  putative 40S ribosomal protein S19 [Arabidopsis thaliana]                                                                                                                                                                                                                                                               |       |         |
|                       |                 |                     |                          |                     | gb AAM65679.1  putative 40S ribosomal protein S19 [Arabidopsis thaliana] sp Q9SGA6 RS191 ARATH 40S ribosomal protein S19-1                                                                                                                                                                                                                                                                                      | 143   | 2E-15   |
|                       |                 |                     |                          |                     | >emb CAA10125.1  40S ribosomal protein S19 [Cicer arietinum]                                                                                                                                                                                                                                                                                                                                                    | 105   | 3E-15   |
| CB885824              | 1.66E-03        | Mo17<B73=F1         | 1.48                     | 10                  | ns                                                                                                                                                                                                                                                                                                                                                                                                              |       |         |
| DV491151              | 1.66E-03        | Mo17<F1<B73         | 1.44                     | 9                   | >ref XP_550001.1  putative nuclease I [Oryza sativa (japonica cultivar-group)]dbj BAB03377.1  putative nuclease I [Oryza sativa (japonica cultivar-group)]                                                                                                                                                                                                                                                      | 308   | 1E-81   |
|                       |                 |                     |                          |                     | dbj BAD52548.1  putative nuclease I [Oryza sativa (japonica cultivar-group)]                                                                                                                                                                                                                                                                                                                                    |       |         |
|                       |                 |                     |                          |                     | >ref NP_909100.1  putative bifunctional nuclease [Oryza sativa (japonica cultivar-group)]                                                                                                                                                                                                                                                                                                                       | 310   | 3E-79   |
|                       |                 |                     |                          |                     | >ref NP_680734.1  endonuclease/ nucleic acid binding [Arabidopsis thaliana]                                                                                                                                                                                                                                                                                                                                     | 299   | 6E-56   |
|                       |                 |                     |                          |                     | >ref XP_474151.1  OSJNBa0060D06.10 [Oryza sativa (japonica cultivar-group)]emb CAE03544.2  OSJNBa0060D06.10 [Oryza sativa (japonica cultivar-group)]                                                                                                                                                                                                                                                            | 290   | 1E-54   |
|                       |                 |                     |                          |                     | >gb AAD00695.1  bifunctional nuclease [Zinnia elegans]                                                                                                                                                                                                                                                                                                                                                          | 328   | 3E-53   |
| BM334691              | 1.70E-03        | B73<F1=Mo17         | 6.64                     | 3                   | ns                                                                                                                                                                                                                                                                                                                                                                                                              |       |         |
| BM073302              | 1.70E-03        | B73=Mo17<F1         | 1.34                     | 12                  | >sp P11428 SODC2 MAIZE Superoxide dismutase [Cu-Zn] 2gb AAA33511.1  SOD2 protein gb AAA33510.1  superoxide dismutase 2                                                                                                                                                                                                                                                                                          | 151   | 7E-74   |
|                       |                 |                     |                          |                     | >emb CAB57992.1  superoxide dismutase-4AP [Zea mays]sp P23345 SODC4 MAIZE Superoxide dismutase [Cu-Zn] 4A                                                                                                                                                                                                                                                                                                       | 152   | 1E-68   |
|                       |                 |                     |                          |                     | >sp P28757 SODC2_ORYSA Superoxide dismutase [Cu-Zn] 2gb AAC14465.1  cytosolic copper/zinc-superoxide dismutase [Oryza sativa] dbj BAA00800.1  copper/zinc-superoxide dismutase [Oryza sativa (japonica cultivar-group)]                                                                                                                                                                                         | 152   | 2E-68   |
|                       |                 |                     |                          |                     | >gb AAY56345.1  cytoplasmic copper/zinc-superoxide dismutase [Oryza sativa (indicacultivar-group)] sp P28756 SODC1_ORYSA Superoxide dismutase [Cu-Zn] 1 gb AAC14464.1  cytosolic copper/zinc-superoxide dismutase [Oryza sativa] dbj BAA00799.1  copper/zinc-superoxide dismutase [Oryza sativa (japonica cultivar-group)] prf 2111424A Cu/Zn superoxide dismutase                                              | 152   | 4E-68   |
|                       |                 |                     |                          |                     | >sp P23346 SODC5 MAIZE Superoxide dismutase [Cu-Zn] 4AP                                                                                                                                                                                                                                                                                                                                                         | 152   | 4E-68   |



**Table 4. Microarray analysis results, mode of gene action classification, and BLAST annotation for the 1,367 ESTs identified as differentially expressed among genotypes (15% FDR)**

| GenBank accession no. | Overall P value | Significant pattern | Fold change <sup>†</sup> | Sector <sup>‡</sup> | BLAST annotation*                                                                                                                                                                                                                                                                                                                                                                                                                                             | Score | E value |
|-----------------------|-----------------|---------------------|--------------------------|---------------------|---------------------------------------------------------------------------------------------------------------------------------------------------------------------------------------------------------------------------------------------------------------------------------------------------------------------------------------------------------------------------------------------------------------------------------------------------------------|-------|---------|
| CB331619              | 1.75E-03        | Mo17<B73=F1         | 1.38                     | 10                  | >gb ABA99572.1  hypothetical protein LOC Os12g37060 [Oryza sativa (japonica cultivar-group)]                                                                                                                                                                                                                                                                                                                                                                  | 214   | 1E-86   |
|                       |                 |                     |                          |                     | >gb ABA95272.1  hypothetical protein LOC Os11g44940 [Oryza sativa (japonica cultivar-group)]                                                                                                                                                                                                                                                                                                                                                                  | 211   | 2E-76   |
|                       |                 |                     |                          |                     | >ref NP_567130.1  unknown protein [Arabidopsis thaliana]                                                                                                                                                                                                                                                                                                                                                                                                      | 213   | 7E-72   |
|                       |                 |                     |                          |                     | >gb AAN46755.1  At3g62580/T12C14_280 [Arabidopsis thaliana]gb AAL06485.1  AT3g62580/T12C14_280 [Arabidopsis thaliana]                                                                                                                                                                                                                                                                                                                                         | 206   | 5E-65   |
|                       |                 |                     |                          |                     | >emb CAB83108.1  putative protein [Arabidopsis thaliana]                                                                                                                                                                                                                                                                                                                                                                                                      | 156   | 6E-58   |
| DV621027              | 1.75E-03        | Mo17<B73=F1         | 1.32                     | 10                  | >emb CAI64401.1  thioredoxin h2 protein [Zea mays]                                                                                                                                                                                                                                                                                                                                                                                                            | 122   | 1E-56   |
|                       |                 |                     |                          |                     | >pdb 1WMJ A Chain A, Solution Structure Of Thioredoxin Type H From Oryza Sativa                                                                                                                                                                                                                                                                                                                                                                               | 130   | 1E-38   |
|                       |                 |                     |                          |                     | >ref XP_476912.1  Thioredoxin H-type (TRX-H) [Oryza sativa (japonica cultivar-group)]dbj BAD30186.1  Thioredoxin H-type (TRX-H) [Oryza sativa (japonica cultivar-group)] dbj BAC79928.1  Thioredoxin H-type (TRX-H) [Oryza sativa (japonica cultivar-group)] dbj BAA04864.1  thioredoxin h [Oryza sativa (japonica cultivar-group)] sp Q42443 TRXH_ORYSA Thioredoxin H-type (TRX-H) (Phloem sap 13 kDa protein 1) gb AAB51522.1  thioredoxin h [Oryza sativa] | 122   | 2E-38   |
|                       |                 |                     |                          |                     | dbj BAA05546.1  thioredoxin h [Oryza sativa]                                                                                                                                                                                                                                                                                                                                                                                                                  | 118   | 1E-36   |
|                       |                 |                     |                          |                     | >gb AAL67139.1  thioredoxin H [Triticum aestivum]                                                                                                                                                                                                                                                                                                                                                                                                             | 118   | 4E-36   |
|                       |                 |                     |                          |                     | >gb AAP72290.1  thioredoxin h isoform 1; HvTrxH1 [Hordeum vulgare subsp. vulgare]                                                                                                                                                                                                                                                                                                                                                                             | 118   | 4E-36   |
|                       |                 |                     |                          |                     | >ref NP_193391.3  catalytic [Arabidopsis thaliana]                                                                                                                                                                                                                                                                                                                                                                                                            | 479   | 2E-73   |
| DV494132              | 1.76E-03        | Mo17<B73=F1         | 1.21                     | 11                  | >gb AAT77924.1  expressed protein [Oryza sativa (japonica cultivar-group)]                                                                                                                                                                                                                                                                                                                                                                                    | 335   | 6E-65   |
|                       |                 |                     |                          |                     | >emb CAB46038.1  hypothetical protein [Arabidopsis thaliana]emb CAB78700.1  hypothetical protein [Arabidopsis thaliana]                                                                                                                                                                                                                                                                                                                                       | 300   | 6E-65   |
|                       |                 |                     |                          |                     | >gb AAO63356.1  At4g16580 [Arabidopsis thaliana]dbj BAC42578.1  unknown protein [Arabidopsis thaliana]                                                                                                                                                                                                                                                                                                                                                        | 467   | 6E-65   |
|                       |                 |                     |                          |                     | >ref NP_201473.1  catalytic [Arabidopsis thaliana]gb AAN15547.1  putative protein [Arabidopsis thaliana] gb AAM97071.1  putative protein [Arabidopsis thaliana]                                                                                                                                                                                                                                                                                               | 414   | 2E-62   |
|                       |                 |                     |                          |                     | dbj BAA97278.1  unnamed protein product [Arabidopsis thaliana] dbj BAC41805.1  unknown protein [Arabidopsis thaliana]                                                                                                                                                                                                                                                                                                                                         | 414   | 2E-62   |
| BG842068              | 1.76E-03        | Mo17<B73=F1         | 1.77                     | 10                  | ns                                                                                                                                                                                                                                                                                                                                                                                                                                                            |       |         |
| DV493995              | 1.77E-03        | B73<F1=Mo17         | 1.87                     | 3                   | >ref XP_474072.1  OSJNBb0079B02.14 [Oryza sativa (japonica cultivar-group)]emb CAE05968.2  OSJNBa0063C18.9 [Oryza sativa (japonica cultivar-group)]                                                                                                                                                                                                                                                                                                           | 269   | 1E-74   |
|                       |                 |                     |                          |                     | emb CAD41855.2  OSJNBb0079B02.14 [Oryza sativa (japonica cultivar-group)]                                                                                                                                                                                                                                                                                                                                                                                     | 293   | 4E-46   |
|                       |                 |                     |                          |                     | >ref NP_201056.1  ATEB1B; microtubule binding [Arabidopsis thaliana]gb AAM61163.1  microtubule-associated protein EB1-like protein [Arabidopsis thaliana]                                                                                                                                                                                                                                                                                                     | 276   | 4E-45   |
|                       |                 |                     |                          |                     | dbj BAB11500.1  microtubule-associated protein EB1-like protein [Arabidopsis thaliana]                                                                                                                                                                                                                                                                                                                                                                        | 332   | 2E-31   |
|                       |                 |                     |                          |                     | >ref NP_190353.3  ATEB1A; microtubule binding [Arabidopsis thaliana]gb AAP88341.1  At3g47690 [Arabidopsis thaliana]                                                                                                                                                                                                                                                                                                                                           | 329   | 6E-29   |
|                       |                 |                     |                          |                     | >ref NP_922172.1  putative microtubule-associated protein [Oryza sativa (japonica cultivar-group)] gb AAM93680.1  putative microtubule-associated protein [Oryza sativa (japonica cultivar-group)] gb AAP54459.1  microtubule-associated protein, putative [Oryza sativa (japonica cultivar-group)]                                                                                                                                                           |       |         |
|                       |                 |                     |                          |                     | >ref NP_201528.1  ATEB1C (MICROTUBULE END BINDING PROTEIN 1); microtubule binding [Arabidopsis thaliana] gb AAM65311.1  microtubule-associated protein EB1-like protein [Arabidopsis thaliana] dbj BAD43258.1  unknown protein [Arabidopsis thaliana] dbj BAB09646.1  unnamed protein product [Arabidopsis thaliana]                                                                                                                                          |       |         |
| DV489577              | 1.78E-03        | B73=F1<Mo17         | 4.56                     | 4                   | >ref XP_463448.1  P0512C01.22 [Oryza sativa (japonica cultivar-group)]dbj BAB92368.1  phospholipase-like [Oryza sativa (japonica cultivar-group)]                                                                                                                                                                                                                                                                                                             | 1044  | 9E-39   |
|                       |                 |                     |                          |                     | dbj BAB61223.1  contains EST AU057376(S21389)-similar to Arabidopsis thaliana chromosome 5, F8F6.250-unknown protein [Oryza sativa (japonica cultivar-group)]                                                                                                                                                                                                                                                                                                 |       |         |
| BG873965              | 1.79E-03        | Mo17<B73=F1         | 1.38                     | 11                  | >ref XP_467968.1  putative flavonol synthase [Oryza sativa (japonica cultivar-group)]dbj BAD17324.1  putative flavonol synthase [Oryza sativa (japonica cultivar-group)]                                                                                                                                                                                                                                                                                      | 331   | 5E-52   |
|                       |                 |                     |                          |                     | >emb CAA80264.1  flavonol synthase [Petunia x hybrida]sp Q07512 FLS_PETHY Flavonol synthase/flavanone 3-hydroxylase (FLS)                                                                                                                                                                                                                                                                                                                                     | 348   | 2E-44   |
|                       |                 |                     |                          |                     | >sp Q9ZQW9 FLS_CITUN Flavonol synthase/flavanone 3-hydroxylase (FLS) (CitFLS)dbj BAA36554.1  flavonol synthase [Citrus unshiu]                                                                                                                                                                                                                                                                                                                                | 335   | 2E-44   |
|                       |                 |                     |                          |                     | >dbj BAD34463.1  flavonol synthase [Eustoma grandiflorum]                                                                                                                                                                                                                                                                                                                                                                                                     | 335   | 3E-44   |
|                       |                 |                     |                          |                     | >dbj BAC10995.1  flavonol synthase [Nierembergia sp. NB17]                                                                                                                                                                                                                                                                                                                                                                                                    | 346   | 4E-44   |
| DV492988              | 1.79E-03        | B73<F1=Mo17         | 1.51                     | 3                   | >ref XP_475843.1  putative protein kinase [Oryza sativa (japonica cultivar-group)]                                                                                                                                                                                                                                                                                                                                                                            | 559   | 6E-58   |
|                       |                 |                     |                          |                     | >dbj BAD94332.1  putative protein kinase [Arabidopsis thaliana]                                                                                                                                                                                                                                                                                                                                                                                               | 328   | 3E-48   |
|                       |                 |                     |                          |                     | >ref NP_564946.1  kinase/ protein kinase [Arabidopsis thaliana]gb AAG52037.1  putative protein kinase; 22015-24834 [Arabidopsis thaliana] gb AAG51596.1  putative protein kinase; tRNA-Met; tRNA-Phe; tRNA-Ile [Arabidopsis thaliana] sp Q9S713 STT7_ARATH Serine/threonine-protein kinase SNT7, chloroplast precursor (Stt7 homolog)                                                                                                                         | 562   | 3E-48   |
|                       |                 |                     |                          |                     | >gb AAC49676.1  lethal leaf-spot 1 [Zea mays]                                                                                                                                                                                                                                                                                                                                                                                                                 | 467   | 1E-74   |
| DV491297              | 1.80E-03        | B73<F1=Mo17         | 1.54                     | 3                   | >ref XP_470215.1  Putative cell death suppressor protein [Oryza sativa]gb AAK98735.1  Putative cell death suppressor protein [Oryza sativa]                                                                                                                                                                                                                                                                                                                   | 515   | 2E-64   |
|                       |                 |                     |                          |                     | >gb AAC49678.1  lethal leaf-spot 1 [Zea mays]                                                                                                                                                                                                                                                                                                                                                                                                                 | 505   | 1E-62   |
|                       |                 |                     |                          |                     | >gb AAL32300.1  lethal leaf spot 1-like protein [Lycopersicon esculentum]                                                                                                                                                                                                                                                                                                                                                                                     | 537   | 5E-55   |
|                       |                 |                     |                          |                     | >gb API3565.1  lethal leaf spot 1-like protein [Vigna unguiculata]                                                                                                                                                                                                                                                                                                                                                                                            | 545   | 4E-48   |
|                       |                 |                     |                          |                     | >ref XP_476832.1  putative z-protein [Oryza sativa (japonica cultivar-group)]dbj BAD30317.1  putative z-protein [Oryza sativa (japonica cultivar-group)]                                                                                                                                                                                                                                                                                                      |       |         |
|                       |                 |                     |                          |                     | dbj BAC83445.1  putative z-protein [Oryza sativa (japonica cultivar-group)]                                                                                                                                                                                                                                                                                                                                                                                   | 244   | 1E-46   |
| CB605539              | 1.80E-03        | Mo17<B73=F1         | 1.29                     | 10                  | >emb CAI53895.2  putative receptor associated protein [Capsicum chinense]                                                                                                                                                                                                                                                                                                                                                                                     | 242   | 9E-41   |

**Table 4. Microarray analysis results, mode of gene action classification, and BLAST annotation for the 1,367 ESTs identified as differentially expressed among genotypes (15% FDR)**

| GenBank accession no. | Overall P value | Significant pattern | Fold change <sup>†</sup> | Sector <sup>‡</sup> | BLAST annotation*                                                                                                                                                                                                                                                                                                                                                                                                                                                                                                                                               | Score | E value |
|-----------------------|-----------------|---------------------|--------------------------|---------------------|-----------------------------------------------------------------------------------------------------------------------------------------------------------------------------------------------------------------------------------------------------------------------------------------------------------------------------------------------------------------------------------------------------------------------------------------------------------------------------------------------------------------------------------------------------------------|-------|---------|
|                       |                 |                     |                          |                     | >ref NP_171806.1  glutamate binding [Arabidopsis thaliana]gb AAR24681.1 At1g03070 [Arabidopsis thaliana] dbj BAD43212.1  putative glutamate/aspartate-binding peptide [Arabidopsis thaliana] gb AAD25802.1  Belongs to the PF01027 Uncharacterized protein family UPF0005 with 7 transmembrane domains.                                                                                                                                                                                                                                                         | 247   | 3E-39   |
|                       |                 |                     |                          |                     | [Arabidopsis thaliana]<br>>ref XP_469710.1  putative receptor-associated protein [Oryza sativa (japonica cultivar-group)] gb AAK71568.1  putative receptor-associated protein [Oryza sativa (japonica cultivar-group)]                                                                                                                                                                                                                                                                                                                                          | 229   | 6E-39   |
|                       |                 |                     |                          |                     | >gb AAV74230.1  At3g63310 [Arabidopsis thaliana]ref NP_191890.1  glutamate binding [Arabidopsis thaliana] emb CAB86432.1  putative protein [Arabidopsis thaliana] gb AAX22267.1  At3g63310 [Arabidopsis thaliana]                                                                                                                                                                                                                                                                                                                                               | 239   | 6E-39   |
| CB885610              | 1.82E-03        | B73<F1=Mo17         | 1.6                      | 3                   | >dbj BAD52841.1  putative insulin degrading enzyme [Oryza sativa (japonica cultivar-group)]                                                                                                                                                                                                                                                                                                                                                                                                                                                                     | 973   | 6E-70   |
|                       |                 |                     |                          |                     | >ref XP_463457.1  putative zinc protease [Oryza sativa (japonica cultivar-group)]                                                                                                                                                                                                                                                                                                                                                                                                                                                                               | 946   | 6E-70   |
|                       |                 |                     |                          |                     | >dbj BAD52843.1  putative insulin degrading enzyme [Oryza sativa (japonica cultivar-group)]                                                                                                                                                                                                                                                                                                                                                                                                                                                                     | 949   | 2E-67   |
|                       |                 |                     |                          |                     | >ref XP_463460.1  putative zinc protease [Oryza sativa (japonica cultivar-group)]                                                                                                                                                                                                                                                                                                                                                                                                                                                                               | 945   | 2E-67   |
|                       |                 |                     |                          |                     | >ref XP_478770.1  putative insulin degrading enzyme [Oryza sativa (japonica cultivar-group)] dbj BAC79700.1  putative insulin degrading enzyme [Oryza sativa (japonica cultivar-group)]                                                                                                                                                                                                                                                                                                                                                                         | 988   | 6E-44   |
| DV493565              | 1.82E-03        | B73<F1=Mo17         | 1.54                     | 2                   | >gb AAQ62068.1  Single myb histone 4 [Zea mays]                                                                                                                                                                                                                                                                                                                                                                                                                                                                                                                 | 288   | 8E-52   |
|                       |                 |                     |                          |                     | >gb AAL73044.1  histone H1-like protein [Zea mays]                                                                                                                                                                                                                                                                                                                                                                                                                                                                                                              | 288   | 1E-51   |
|                       |                 |                     |                          |                     | >gb AAQ62066.1  single myb histone 3 [Zea mays]                                                                                                                                                                                                                                                                                                                                                                                                                                                                                                                 | 285   | 9E-40   |
|                       |                 |                     |                          |                     | >emb CAD44620.1  MYB28 protein [Oryza sativa (japonica cultivar-group)]                                                                                                                                                                                                                                                                                                                                                                                                                                                                                         | 304   | 1E-22   |
|                       |                 |                     |                          |                     | >dbj BAD81933.1  DNA-binding protein MYB1-like [Oryza sativa (japonica cultivar-group)]                                                                                                                                                                                                                                                                                                                                                                                                                                                                         | 257   | 1E-22   |
| DV549673              | 1.82E-03        | Mo17<B73=F1         | 1.3                      | 11                  | >dbj BAD72286.1  putative 26S proteasome regulatory particle triple-A ATPasesubunit5a [Oryza sativa (japonica cultivar-group)]                                                                                                                                                                                                                                                                                                                                                                                                                                  | 429   | e-104   |
|                       |                 |                     |                          |                     | >dbj BAD36042.1  26S proteasome regulatory particle triple-A ATPase subunit5a [Oryzasativa (japonica cultivar-group)] dbj BAB78492.1  26S proteasome regulatory particle triple-A ATPase subunit5a [Oryza sativa (japonica cultivar-group)]                                                                                                                                                                                                                                                                                                                     | 429   | e-101   |
|                       |                 |                     |                          |                     | >sp P46465 PRS6A_ORYSA 26S protease regulatory subunit 6A homolog (TAT-binding proteinhomolog 1) (TBP-1) dbj BAA04614.1  rice homologue of Tat binding protein [Oryza sativa (japonica cultivar-group)]                                                                                                                                                                                                                                                                                                                                                         | 429   | e-101   |
|                       |                 |                     |                          |                     | >emb CAA52445.1  Mg-dependent ATPase 1 [Lycopersicon esculentum]sp P54776 PRS6A_LYCES 26S protease regulatory subunit 6A homolog (TAT-binding protein homolog 1) (TBP-1) (Mg(2+)-dependent ATPase 1) (LEMA-1)                                                                                                                                                                                                                                                                                                                                                   | 423   | 5E-97   |
|                       |                 |                     |                          |                     | >dbj BAB21595.1  Tat binding protein like protein [Brassica rapa]                                                                                                                                                                                                                                                                                                                                                                                                                                                                                               | 424   | 3E-96   |
| DV495861              | 1.83E-03        | B73=F1<Mo17         | 1.48                     | 4                   | >gb AAT85074.1  hypothetical protein [Oryza sativa (japonica cultivar-group)]                                                                                                                                                                                                                                                                                                                                                                                                                                                                                   | 94    | 8E-40   |
|                       |                 |                     |                          |                     | >gb AAM67304.1  unknown [Arabidopsis thaliana]gb AAO42828.1 At1g67350 [Arabidopsis thaliana] gb AAG00242.1  F1N21.17 [Arabidopsis thaliana]                                                                                                                                                                                                                                                                                                                                                                                                                     | 98    | 2E-32   |
|                       |                 |                     |                          |                     | >gb AAS20985.1  At1g67350-like protein [Hyacinthus orientalis]                                                                                                                                                                                                                                                                                                                                                                                                                                                                                                  | 91    | 3E-32   |
|                       |                 |                     |                          |                     | >gb AAS20982.1  unknown [Hyacinthus orientalis]                                                                                                                                                                                                                                                                                                                                                                                                                                                                                                                 | 91    | 3E-32   |
|                       |                 |                     |                          |                     | >gb ABC46709.1  RW1-like protein [Arachis hypogaea]                                                                                                                                                                                                                                                                                                                                                                                                                                                                                                             | 64    | 1E-20   |
| CD573098              | 1.83E-03        | Mo17<B73=F1         | 1.58                     | 10                  | >ref XP_468402.1  putative NADH dehydrogenase [Oryza sativa (japonica cultivar-group)] dbj BAD22016.1  putative NADH dehydrogenase [Oryza sativa (japonica cultivar-group)] dbj BAD21515.1  putative NADH dehydrogenase [Oryza sativa (japonica cultivar-group)]                                                                                                                                                                                                                                                                                                | 408   | 3E-81   |
|                       |                 |                     |                          |                     | >ref NP_565469.1  unknown protein [Arabidopsis thaliana]gb AAT68351.1  hypothetical protein At2g20360 [Arabidopsis thaliana] gb AAK93749.1  putative NADH-ubiquinone oxidoreductase [Arabidopsis thaliana] gb AAK59545.1  putative NADH-ubiquinone oxidoreductase [Arabidopsis thaliana] gb AAD21752.2  putative NADH-ubiquinone oxidoreductase [Arabidopsis thaliana] gb AAX23820.1  hypothetical protein At2g20360 [Arabidopsis thaliana]                                                                                                                     | 402   | 7E-55   |
|                       |                 |                     |                          |                     | >gb AAH91192.1  Ndufa9 protein [Rattus norvegicus]                                                                                                                                                                                                                                                                                                                                                                                                                                                                                                              | 370   | 3E-30   |
|                       |                 |                     |                          |                     | >ref XP_508942.1  PREDICTED: NADH dehydrogenase (ubiquinone) 1 alpha subcomplex, 9.39kDa [Pan troglodytes]                                                                                                                                                                                                                                                                                                                                                                                                                                                      | 347   | 4E-30   |
|                       |                 |                     |                          |                     | >emb CAH92896.1  hypothetical protein [Pongo pygmaeus]                                                                                                                                                                                                                                                                                                                                                                                                                                                                                                          | 377   | 6E-30   |
| DV489661              | 1.84E-03        | F1=Mo17<B73         | 1.6                      | 9                   | >dbj BAD91083.1  beta-D-galactosidase [Pyrus pyrifolia]                                                                                                                                                                                                                                                                                                                                                                                                                                                                                                         | 842   | 5E-36   |
|                       |                 |                     |                          |                     | >gb AAF70824.1  putative beta-galactosidase [Lycopersicon esculentum]                                                                                                                                                                                                                                                                                                                                                                                                                                                                                           | 852   | 1E-35   |
|                       |                 |                     |                          |                     | >gb AAQ21371.2  beta-galactosidase [Sandersonia aurantiaca]                                                                                                                                                                                                                                                                                                                                                                                                                                                                                                     | 818   | 5E-35   |
|                       |                 |                     |                          |                     | >emb CAC44501.1  beta-galactosidase [Fragaria x ananassa]                                                                                                                                                                                                                                                                                                                                                                                                                                                                                                       | 840   | 2E-34   |
|                       |                 |                     |                          |                     | >dbj BAD20774.2  beta-galactosidase [Raphanus sativus]                                                                                                                                                                                                                                                                                                                                                                                                                                                                                                          | 851   | 1E-33   |
| BG840947              | 1.86E-03        | F1=Mo17<B73         | 2.99                     | 9                   | >ref XP_450939.1  putative succinoaminoimidazolecarboximide ribonucleotide synthetase[Oryza sativa (japonica cultivar-group)] dbj BAD17522.1  putative succinoaminoimidazolecarboximide ribonucleotide synthetase [Oryza sativa (japonica cultivar-group)]                                                                                                                                                                                                                                                                                                      | 403   | 9E-34   |
|                       |                 |                     |                          |                     | >gb AAR06292.1  SAICAR synthetase [Nicotiana tabacum]                                                                                                                                                                                                                                                                                                                                                                                                                                                                                                           | 399   | 4E-29   |
|                       |                 |                     |                          |                     | >gb AAL48317.1  succinoaminoimidazolecarboximide ribonucleotide synthetase [Vignaunguiculata]                                                                                                                                                                                                                                                                                                                                                                                                                                                                   | 402   | 1E-28   |
|                       |                 |                     |                          |                     | >ref NP_001030739.1  PUR7; phosphoribosylaminoimidazolesuccinocarboxamide synthase[Arabidopsis thaliana] ref NP_188748.1  PUR7; phosphoribosylaminoimidazolesuccinocarboxamide synthase [Arabidopsis thaliana] gb AAO22563.1  putative phosphoribosylamidoimidazole-succinocarboxamide synthase [Arabidopsis thaliana] dbj BAB01454.1  5'-phosphoribosyl-4-(N-succinocarboxamide)-5- ami noimidazole synthetase [Arabidopsis thaliana] sp P38025 PUR7 ARATH Phosphoribosylaminoimidazole-succinocarboxamide synthase, chloroplast precursor (SAICAR synthetase) | 411   | 1E-27   |
|                       |                 |                     |                          |                     | >gb AAL85973.1  putative phosphoribosylamidoimidazole-succinocarboxamide synthase[Arabidopsis thaliana]                                                                                                                                                                                                                                                                                                                                                                                                                                                         | 374   | 1E-27   |

**Table 4. Microarray analysis results, mode of gene action classification, and BLAST annotation for the 1,367 ESTs identified as differentially expressed among genotypes (15% FDR)**

| GenBank accession no. | Overall P value | Significant pattern | Fold change <sup>†</sup> | Sector <sup>‡</sup> | BLAST annotation*                                                                                                                                                                                                                                                                                                                                                                                                                                                                              | Score | E value |
|-----------------------|-----------------|---------------------|--------------------------|---------------------|------------------------------------------------------------------------------------------------------------------------------------------------------------------------------------------------------------------------------------------------------------------------------------------------------------------------------------------------------------------------------------------------------------------------------------------------------------------------------------------------|-------|---------|
| BM379680              | 1.87E-03        | B73=Mo17<F1         | 1.37                     | 12                  | >sp P11428 SODC2 MAIZE Superoxide dismutase [Cu-Zn] 2gb AAA33511.1  SOD2 protein gb AAA33510.1  superoxide dismutase 2                                                                                                                                                                                                                                                                                                                                                                         | 151   | 1E-43   |
|                       |                 |                     |                          |                     | >emb CAB57993.1  superoxide dismutase-4A [Zea mays]gb AAB49913.1  superoxide dismutase 4A                                                                                                                                                                                                                                                                                                                                                                                                      | 152   | 2E-40   |
|                       |                 |                     |                          |                     | >emb CAB57992.1  superoxide dismutase-4AP [Zea mays]sp P23345 SODC4 MAIZE Superoxide dismutase [Cu-Zn] 4A                                                                                                                                                                                                                                                                                                                                                                                      | 152   | 2E-40   |
|                       |                 |                     |                          |                     | >sp P23346 SODC5 MAIZE Superoxide dismutase [Cu-Zn] 4AP                                                                                                                                                                                                                                                                                                                                                                                                                                        | 152   | 2E-40   |
|                       |                 |                     |                          |                     | >gb AA56345.1  cytoplasmic copper/zinc-superoxide dismutase [Oryza sativa (indicacultivar-group)] sp P28756 SODC1_ORYSA Superoxide dismutase [Cu-Zn] 1 gb AAC14464.1  cytosolic copper/zinc-superoxide dismutase [Oryza sativa] dbj BAA00799.1  copper/zinc-superoxide dismutase [Oryza sativa (japonica cultivar-group)] prf j211424A Cu/Zn superoxide dismutase                                                                                                                              | 152   | 2E-39   |
| CD484895              | 1.87E-03        | B73<F1=Mo17         | 1.4                      | 3                   | >emb CAA69075.1  S-adenosylmethionine decarboxylase [Zea mays]sp O24575 DCAM_MAIZE S-adenosylmethionine decarboxylase proenzyme (AdoMetDC) (SamDC) [Contains: S-adenosylmethionine decarboxylase alpha chain; S-adenosylmethionine decarboxylase beta chain]                                                                                                                                                                                                                                   | 400   | 3E-12   |
|                       |                 |                     |                          |                     | >gb AAO43185.1  S-adenosylmethionine decarboxylase leader [Narcissuspseudonarcissus]                                                                                                                                                                                                                                                                                                                                                                                                           | 51    | 2E-11   |
|                       |                 |                     |                          |                     | >emb CAD41510.3  OSJNBA0029H02.4 [Oryza sativa (japonica cultivar-group)]                                                                                                                                                                                                                                                                                                                                                                                                                      | 450   | 2E-11   |
|                       |                 |                     |                          |                     | >gb AAR84407.1  S-adenosylmethionine decarboxylase uORF [Daucus carota]                                                                                                                                                                                                                                                                                                                                                                                                                        | 53    | 6E-11   |
|                       |                 |                     |                          |                     | >gb AAC48988.1  putative                                                                                                                                                                                                                                                                                                                                                                                                                                                                       | 51    | 6E-11   |
| CD058876              | 1.88E-03        | B73<F1=Mo17         | 1.35                     | 3                   | >gb AAT42128.1  putative zinc finger protein ZF2 [Zea mays]                                                                                                                                                                                                                                                                                                                                                                                                                                    | 176   | 1E-29   |
|                       |                 |                     |                          |                     | >gb AAO46040.1  zinc finger transcription factor ZFP30 [Oryza sativa (japonicacultivar-group)]                                                                                                                                                                                                                                                                                                                                                                                                 | 166   | 4E-26   |
|                       |                 |                     |                          |                     | >ref XP_464544.1  zinc finger transcription factor ZFP30 [Oryza sativa (japonicacultivar-group)] ref XP_507460.1  PREDICTED OJ1135_F06.29 gene product [Oryza sativa (japonica cultivar-group)] ref XP_506755.1  PREDICTED OJ1135_F06.29 gene product [Oryza sativa (japonica cultivar-group)] dbj BAD16000.1  zinc finger transcription factor ZFP30 [Oryza sativa (japonica cultivar-group)] dbj BAD15513.1  zinc finger transcription factor ZFP30 [Oryza sativa (japonica cultivar-group)] | 166   | 4E-26   |
|                       |                 |                     |                          |                     | >gb AAZ94630.1  zinc finger protein-like protein [Gossypium hirsutum]                                                                                                                                                                                                                                                                                                                                                                                                                          | 139   | 2E-22   |
|                       |                 |                     |                          |                     | >ref NP_197931.1  binding [Arabidopsis thaliana]gb AAO63982.1  unknown protein [Arabidopsis thaliana] dbj BAC43503.1  unknown protein [Arabidopsis thaliana]                                                                                                                                                                                                                                                                                                                                   | 170   | 2E-15   |
| CD527324              | 1.89E-03        | Mo17<B73=F1         | 1.68                     | 10                  | >gb ABA96028.1  expressed protein [Oryza sativa (japonica cultivar-group)]                                                                                                                                                                                                                                                                                                                                                                                                                     | 438   | 2E-39   |
|                       |                 |                     |                          |                     | >ref NP_200323.1  unknown protein [Arabidopsis thaliana]gb AAM14224.1  unknown protein [Arabidopsis thaliana] gb AAL36095.1  unknown protein [Arabidopsis thaliana] dbj BAB08581.1  unnamed protein product [Arabidopsis thaliana]                                                                                                                                                                                                                                                             | 431   | 1E-31   |
|                       |                 |                     |                          |                     | >gb AAT45011.1  unknown [Xerophyta humilis]                                                                                                                                                                                                                                                                                                                                                                                                                                                    | 343   | 1E-30   |
|                       |                 |                     |                          |                     | >gb AAL07213.1  unknown protein [Arabidopsis thaliana]                                                                                                                                                                                                                                                                                                                                                                                                                                         | 442   | 2E-29   |
|                       |                 |                     |                          |                     | >ref NP_567759.1  VTC2 (VITAMIN C DEFECTIVE 2) [Arabidopsis thaliana]gb AAM13137.1  putative protein [Arabidopsis thaliana] gb AAP31933.1  At4g26850 [Arabidopsis thaliana]                                                                                                                                                                                                                                                                                                                    | 442   | 2E-29   |
| CD510345              | 1.91E-03        | B73<F1=Mo17         | 1.53                     | 3                   | >gb AAT94032.1  beta-tubulin [Oryza sativa (japonica cultivar-group)]dbj BAC82429.1  beta-tubulin [Oryza sativa (japonica cultivar-group)]                                                                                                                                                                                                                                                                                                                                                     | 444   | 6E-75   |
|                       |                 |                     |                          |                     | sp Q76FS3 TBB6 ORYSA Tubulin beta-6 chain (Beta-6 tubulin)                                                                                                                                                                                                                                                                                                                                                                                                                                     | 447   | 8E-75   |
|                       |                 |                     |                          |                     | >emb CAE55022.1  beta tubulin [Oryza sativa (japonica cultivar-group)]                                                                                                                                                                                                                                                                                                                                                                                                                         | 448   | 8E-75   |
|                       |                 |                     |                          |                     | >emb CAE52516.1  beta tubulin [Setaria viridis]                                                                                                                                                                                                                                                                                                                                                                                                                                                | 447   | 8E-75   |
|                       |                 |                     |                          |                     | >ref NP_915874.1  tubulin beta chain [Oryza sativa (japonica cultivar-group)]dbj BAB92274.1  beta-tubulin [Oryza sativa (japonica cultivar-group)] dbj BAA06381.1  beta-tubulin [Oryza sativa (japonica cultivar-group)] sp P45960 TBB4 ORYSA Tubulin beta-4 chain (Beta-4 tubulin)                                                                                                                                                                                                            | 447   | 8E-75   |
| CB381181              | 1.91E-03        | B73<F1=Mo17         | 1.46                     | 3                   | >gb AAA66495.1  beta-tubulin                                                                                                                                                                                                                                                                                                                                                                                                                                                                   | 447   | 8E-75   |
|                       |                 |                     |                          |                     | >emb CAE52516.1  beta tubulin [Setaria viridis]                                                                                                                                                                                                                                                                                                                                                                                                                                                | 448   | e-109   |
|                       |                 |                     |                          |                     | >ref NP_915874.1  tubulin beta chain [Oryza sativa (japonica cultivar-group)]dbj BAB92274.1  beta-tubulin [Oryza sativa (japonica cultivar-group)] dbj BAA06381.1  beta-tubulin [Oryza sativa (japonica cultivar-group)] sp P45960 TBB4 ORYSA Tubulin beta-4 chain (Beta-4 tubulin)                                                                                                                                                                                                            | 447   | e-109   |
|                       |                 |                     |                          |                     | >sp Q41783 TBB6 MAIZE Tubulin beta-6 chain (Beta-6 tubulin)gb AAA20186.1  beta-6 tubulin                                                                                                                                                                                                                                                                                                                                                                                                       | 446   | e-109   |
|                       |                 |                     |                          |                     | >sp Q41785 TBB8 MAIZE Tubulin beta-8 chain (Beta-8 tubulin)gb AAA19709.1  beta-8 tubulin                                                                                                                                                                                                                                                                                                                                                                                                       | 445   | e-109   |
| CB331093              | 1.91E-03        | F1=Mo17<B73         | 1.26                     | 9                   | >ref NP_912596.1  tubulin beta-4 chain [Oryza sativa (japonica cultivar-group)]dbj BAB64211.1  putative beta-tubulin 4 [Oryza sativa (japonica cultivar-group)] sp Q43594 TBB1 ORYSA Tubulin beta-1 chain (Beta-1 tubulin) dbj BAB39951.1  putative tubulin beta-4 chain [Oryza sativa (japonica cultivar-group)]                                                                                                                                                                              | 447   | e-109   |
|                       |                 |                     |                          |                     | >gb AAT76364.1  putative ribosomal protein L19 [Oryza sativa (japonicacultivar-group)] gb AAP05800.1  putative ribosomal protein L19 [Oryza sativa (japonica cultivar-group)]                                                                                                                                                                                                                                                                                                                  | 206   | 2E-66   |
|                       |                 |                     |                          |                     | >gb AAP80858.1  ribosomal protein L19 [Triticum aestivum]                                                                                                                                                                                                                                                                                                                                                                                                                                      | 209   | 1E-65   |
|                       |                 |                     |                          |                     | >gb AAT08672.1  ribosomal protein L19 [Hyacinthus orientalis]                                                                                                                                                                                                                                                                                                                                                                                                                                  | 203   | 1E-63   |
|                       |                 |                     |                          |                     | >gb AAR83877.1  60S ribosomal protein L19 [Capsicum annuum]                                                                                                                                                                                                                                                                                                                                                                                                                                    | 232   | 5E-62   |
| DV490929              | 1.92E-03        | Mo17<B73=F1         | 1.44                     | 10                  | >gb ABC01909.1  60S ribosomal protein L19-like protein [Solanum tuberosum]                                                                                                                                                                                                                                                                                                                                                                                                                     | 209   | 5E-62   |
|                       |                 |                     |                          |                     | >ref NP_918362.1  putative Ca2+/H+-exchanging protein [Oryza sativa (japonicacultivar-group)]                                                                                                                                                                                                                                                                                                                                                                                                  | 424   | 4E-55   |
|                       |                 |                     |                          |                     | >dbj BAD87649.1  cation/proton exchanger 1a [Oryza sativa (japonica cultivar-group)]dbj BAD87498.1  cation/proton exchanger 1a [Oryza sativa (japonica cultivar-group)] dbj BAD06218.1  cation/proton exchanger 1a [Oryza sativa (japonica cultivar-group)] sp Q769E5 CAX1A_ORYSA Vacuolar cation/proton exchanger 1a (Ca(2+)/H(+) exchanger 1a) (OsCAX1a)                                                                                                                                     | 451   | 4E-55   |

**Table 4. Microarray analysis results, mode of gene action classification, and BLAST annotation for the 1,367 ESTs identified as differentially expressed among genotypes (15% FDR)**

| GenBank accession no. | Overall P value | Significant pattern | Fold change <sup>†</sup> | Sector <sup>‡</sup> | BLAST annotation*                                                                                                                                                                                                                                                                                                                                                                                                                                                                                                                                                                                                                                                                                                                                                                                                                                                                                                                                                                                                                                                                                                                                                                                                                                                                                                                                                                                                                                                                                         | Score | E value |
|-----------------------|-----------------|---------------------|--------------------------|---------------------|-----------------------------------------------------------------------------------------------------------------------------------------------------------------------------------------------------------------------------------------------------------------------------------------------------------------------------------------------------------------------------------------------------------------------------------------------------------------------------------------------------------------------------------------------------------------------------------------------------------------------------------------------------------------------------------------------------------------------------------------------------------------------------------------------------------------------------------------------------------------------------------------------------------------------------------------------------------------------------------------------------------------------------------------------------------------------------------------------------------------------------------------------------------------------------------------------------------------------------------------------------------------------------------------------------------------------------------------------------------------------------------------------------------------------------------------------------------------------------------------------------------|-------|---------|
|                       |                 |                     |                          |                     | >gb AAM03123.1  putative Ca2+/H+ exchanger [Oryza sativa]                                                                                                                                                                                                                                                                                                                                                                                                                                                                                                                                                                                                                                                                                                                                                                                                                                                                                                                                                                                                                                                                                                                                                                                                                                                                                                                                                                                                                                                 | 354   | 5E-50   |
|                       |                 |                     |                          |                     | >gb AAF91350.1  calcium/proton exchanger CAX1-like protein [Zea mays]                                                                                                                                                                                                                                                                                                                                                                                                                                                                                                                                                                                                                                                                                                                                                                                                                                                                                                                                                                                                                                                                                                                                                                                                                                                                                                                                                                                                                                     | 418   | 3E-43   |
|                       |                 |                     |                          |                     | >dbj BAA25753.1  Ca2+/H+ exchanger [Vigna radiata]                                                                                                                                                                                                                                                                                                                                                                                                                                                                                                                                                                                                                                                                                                                                                                                                                                                                                                                                                                                                                                                                                                                                                                                                                                                                                                                                                                                                                                                        | 444   | 7E-43   |
| CD001096              | 1.93E-03        | Mo17<B73=F1         | 1.22                     | 10                  | >gb AAM08320.1  small Ran-related GTP-binding protein [Triticum aestivum] gb AAL30396.1  small Ras-related GTP-binding protein [Triticum aestivum]<br>>ref XP_475914.1  GTP-binding nuclear protein RAN-B1 [Oryza sativa (japonica cultivar-group)] gb AAT69585.1  GTP-binding nuclear protein RAN-B1 [Oryza sativa (japonica cultivar-group)] dbj BAA81911.1  Ran [Oryza sativa (japonica cultivar-group)] dbj BAB82438.1  small GTP-binding protein (Ran2) [Oryza sativa (japonica cultivar-group)]                                                                                                                                                                                                                                                                                                                                                                                                                                                                                                                                                                                                                                                                                                                                                                                                                                                                                                                                                                                                     | 221   | 5E-27   |
|                       |                 |                     |                          |                     | >gb AAD18006.1  Ran-related GTP binding protein [Zea mays]                                                                                                                                                                                                                                                                                                                                                                                                                                                                                                                                                                                                                                                                                                                                                                                                                                                                                                                                                                                                                                                                                                                                                                                                                                                                                                                                                                                                                                                | 221   | 5E-27   |
|                       |                 |                     |                          |                     | >emb CAC10213.1  GTP-binding protein [Cicer arietinum]                                                                                                                                                                                                                                                                                                                                                                                                                                                                                                                                                                                                                                                                                                                                                                                                                                                                                                                                                                                                                                                                                                                                                                                                                                                                                                                                                                                                                                                    | 170   | 4E-26   |
|                       |                 |                     |                          |                     | >gb AAM12880.1  GTP-binding protein [Helianthus annuus]                                                                                                                                                                                                                                                                                                                                                                                                                                                                                                                                                                                                                                                                                                                                                                                                                                                                                                                                                                                                                                                                                                                                                                                                                                                                                                                                                                                                                                                   | 221   | 3E-25   |
| CD661795              | 1.95E-03        | Mo17<B73=F1         | 1.29                     | 10                  | >dbj BAD45865.1  pseudouridylylase synthase-like [Oryza sativa (japonica cultivar-group)]<br>>ref NP_198390.2  pseudouridylylase synthase/ tRNA-pseudouridine synthase [Arabidopsis thaliana] gb AAP37871.1  At5g35400 [Arabidopsis thaliana]<br>gb AAO00765.1  putative protein [Arabidopsis thaliana]                                                                                                                                                                                                                                                                                                                                                                                                                                                                                                                                                                                                                                                                                                                                                                                                                                                                                                                                                                                                                                                                                                                                                                                                   | 495   | 1E-96   |
|                       |                 |                     |                          |                     | >gb AAC13601.1  contains similarity to pseudouridylylase synthases [Arabidopsis thaliana]                                                                                                                                                                                                                                                                                                                                                                                                                                                                                                                                                                                                                                                                                                                                                                                                                                                                                                                                                                                                                                                                                                                                                                                                                                                                                                                                                                                                                 | 420   | 9E-58   |
|                       |                 |                     |                          |                     | >ref ZP_00525390.1  tRNA pseudouridine synthase [Solibacter usitatus Ellin6076] gb EAM55608.1  tRNA pseudouridine synthase [Solibacter usitatus Ellin6076]                                                                                                                                                                                                                                                                                                                                                                                                                                                                                                                                                                                                                                                                                                                                                                                                                                                                                                                                                                                                                                                                                                                                                                                                                                                                                                                                                | 364   | 3E-41   |
|                       |                 |                     |                          |                     | >ref ZP_00511188.1  tRNA pseudouridine synthase [Chlorobium limicola DSM 245] gb EAM44258.1  tRNA pseudouridine synthase [Chlorobium limicola DSM 245]                                                                                                                                                                                                                                                                                                                                                                                                                                                                                                                                                                                                                                                                                                                                                                                                                                                                                                                                                                                                                                                                                                                                                                                                                                                                                                                                                    | 256   | 1E-8    |
| CB604876              | 1.95E-03        | B73<F1=Mo17         | 1.44                     | 3                   | >gb AAT93971.1  putative chaperonin [Oryza sativa (japonica cultivar-group)]<br>>gb AAK62448.1  putative chaperonin [Arabidopsis thaliana]<br>>gb AAM61312.1  putative chaperonin [Arabidopsis thaliana]<br>>ref NP_186902.1  ATP binding / protein binding [Arabidopsis thaliana] gb AAF32460.1  putative chaperonin [Arabidopsis thaliana] gb AAM47971.1  putative chaperonin [Arabidopsis thaliana] gb AAL32807.1  putative chaperonin [Arabidopsis thaliana] gb AAN65043.1  putative chaperonin [Arabidopsis thaliana]                                                                                                                                                                                                                                                                                                                                                                                                                                                                                                                                                                                                                                                                                                                                                                                                                                                                                                                                                                                | 535   | 3E-71   |
|                       |                 |                     |                          |                     | >emb CAC01806.1  TCP-1 chaperonin-like protein [Arabidopsis thaliana]                                                                                                                                                                                                                                                                                                                                                                                                                                                                                                                                                                                                                                                                                                                                                                                                                                                                                                                                                                                                                                                                                                                                                                                                                                                                                                                                                                                                                                     | 535   | 7E-67   |
|                       |                 |                     |                          |                     |                                                                                                                                                                                                                                                                                                                                                                                                                                                                                                                                                                                                                                                                                                                                                                                                                                                                                                                                                                                                                                                                                                                                                                                                                                                                                                                                                                                                                                                                                                           | 535   | 7E-67   |
|                       |                 |                     |                          |                     |                                                                                                                                                                                                                                                                                                                                                                                                                                                                                                                                                                                                                                                                                                                                                                                                                                                                                                                                                                                                                                                                                                                                                                                                                                                                                                                                                                                                                                                                                                           | 540   | 3E-64   |
| CD651684              | 1.96E-03        | Mo17<B73=F1         | 1.3                      | 10                  | >gb ABA93723.1  ribosomal protein S7 [Oryza sativa (japonica cultivar-group)]<br>>ref NP_908322.1  putative 40S ribosomal protein S5 [Oryza sativa (japonica cultivar-group)] dbj BAB64234.1  putative 40S ribosomal protein S5 [Oryza sativa (japonica cultivar-group)] dbj BAB62621.1  putative 40S ribosomal protein S5 [Oryza sativa (japonica cultivar-group)]<br>>ref NP_187800.1  ATRPS5A (RIBOSOMAL PROTEIN 5A); structural constituent of ribosome [Arabidopsis thaliana] ref NP_850564.1  ATRPS5A (RIBOSOMAL PROTEIN 5A); structural constituent of ribosome [Arabidopsis thaliana] gb AAF23210.1  putative 40S ribosomal protein S5 [Arabidopsis thaliana]<br>gb AAM14315.1  putative 40S ribosomal protein S5 [Arabidopsis thaliana] gb AAK76520.1  putative 40S ribosomal protein S5 [Arabidopsis thaliana]<br>gb AAM64502.1  40S ribosomal protein S5, putative [Arabidopsis thaliana] dbj BAB03103.1  40S ribosomal protein S5-like [Arabidopsis thaliana]<br>sp P51427 RS5B ARATH 40S ribosomal protein S5-2<br>>ref NP_181264.1  ATRPS5B (RIBOSOMAL PROTEIN 5B); structural constituent of ribosome [Arabidopsis thaliana] ref NP_001031502.1  ATRPS5B (RIBOSOMAL PROTEIN 5B); structural constituent of ribosome [Arabidopsis thaliana] gb AAC98068.1  40S ribosomal protein S5 [Arabidopsis thaliana]<br>gb AAM10231.1  40S ribosomal protein S5 [Arabidopsis thaliana] gb AAL24331.1  40S ribosomal protein S5 [Arabidopsis thaliana] sp Q9ZUT9 RS5A_ARATH 40S ribosomal protein S5-1 | 199   | 1E-96   |
|                       |                 |                     |                          |                     | >emb CAA06491.1  40S ribosomal protein S5 [Cicer arietinum] sp O65731 RS5 CICAR 40S ribosomal protein S5                                                                                                                                                                                                                                                                                                                                                                                                                                                                                                                                                                                                                                                                                                                                                                                                                                                                                                                                                                                                                                                                                                                                                                                                                                                                                                                                                                                                  | 207   | 2E-91   |
|                       |                 |                     |                          |                     |                                                                                                                                                                                                                                                                                                                                                                                                                                                                                                                                                                                                                                                                                                                                                                                                                                                                                                                                                                                                                                                                                                                                                                                                                                                                                                                                                                                                                                                                                                           | 207   | 6E-91   |
|                       |                 |                     |                          |                     |                                                                                                                                                                                                                                                                                                                                                                                                                                                                                                                                                                                                                                                                                                                                                                                                                                                                                                                                                                                                                                                                                                                                                                                                                                                                                                                                                                                                                                                                                                           | 197   | 1E-90   |
| BG842495              | 2.01E-03        | Mo17<B73=F1         | 1.47                     | 10                  | >gb AAG43835.1  protein phosphatase type-2C [Zea mays]<br>>dbj BAD38120.1  putative protein phosphatase type-2C [Oryza sativa (japonica cultivar-group)]<br>>dbj BAD28017.1  putative protein phosphatase type-2C [Oryza sativa (japonica cultivar-group)]<br>>ref NP_194914.1  catalytic/ protein phosphatase type 2C [Arabidopsis thaliana] emb CAB79904.1  protein phosphatase 2C-like protein [Arabidopsis thaliana]<br>emb CAB40756.1  protein phosphatase 2C-like protein [Arabidopsis thaliana] gb AAM47332.1  AT4g31860/F11C18_60 [Arabidopsis thaliana] gb AAL14406.1  AT4g31860/F11C18_60 [Arabidopsis thaliana]<br>>ref NP_180079.1  catalytic/ protein phosphatase type 2C/ protein serine/threoninephosphatase [Arabidopsis thaliana] gb AAM14148.1  putative protein phosphatase 2C [Arabidopsis thaliana] gb AAK92810.1  putative protein phosphatase 2C [Arabidopsis thaliana] gb AAD23006.1  putative protein phosphatase 2C [Arabidopsis thaliana] dbj BAB84700.1  protein phosphatase 2C [Arabidopsis thaliana]                                                                                                                                                                                                                                                                                                                                                                                                                                                                        | 366   | 3E-44   |
|                       |                 |                     |                          |                     |                                                                                                                                                                                                                                                                                                                                                                                                                                                                                                                                                                                                                                                                                                                                                                                                                                                                                                                                                                                                                                                                                                                                                                                                                                                                                                                                                                                                                                                                                                           | 368   | 4E-34   |
|                       |                 |                     |                          |                     |                                                                                                                                                                                                                                                                                                                                                                                                                                                                                                                                                                                                                                                                                                                                                                                                                                                                                                                                                                                                                                                                                                                                                                                                                                                                                                                                                                                                                                                                                                           | 362   | 6E-32   |
|                       |                 |                     |                          |                     |                                                                                                                                                                                                                                                                                                                                                                                                                                                                                                                                                                                                                                                                                                                                                                                                                                                                                                                                                                                                                                                                                                                                                                                                                                                                                                                                                                                                                                                                                                           | 357   | 6E-25   |
|                       |                 |                     |                          |                     |                                                                                                                                                                                                                                                                                                                                                                                                                                                                                                                                                                                                                                                                                                                                                                                                                                                                                                                                                                                                                                                                                                                                                                                                                                                                                                                                                                                                                                                                                                           | 355   | 8E-24   |
| BM073786              | 2.02E-03        | Mo17<B73=F1         | 1.54                     | 11                  | >emb CAA10616.1  eukaryotic translation initiation factor 5 [Zea mays]<br>>emb CAA67868.1  Eukaryotic initiation factor-5 [Zea mays] sp P55876 IF5 MAIZE Eukaryotic translation initiation factor 5 (eIF-5)<br>>dbj BAD54665.1  putative eukaryotic translation initiation factor 5 [Oryza sativa (japonica cultivar-group)]<br>>ref XP_450545.1  putative eukaryotic translation initiation factor 5 [Oryza sativa (japonica cultivar-group)] dbj BAD23595.1  putative eukaryotic translation initiation factor 5 [Oryza sativa (japonica cultivar-group)]<br>>ref XP_450544.1  putative eukaryotic translation initiation factor 5 [Oryza sativa (japonica cultivar-group)] ref XP_506649.1  PREDICTED P0706E03.4-1 gene product [Oryza sativa (japonica cultivar-group)] dbj BAD23594.1  putative eukaryotic translation initiation factor 5 [Oryza sativa (japonica cultivar-group)]                                                                                                                                                                                                                                                                                                                                                                                                                                                                                                                                                                                                                  | 451   | 5E-54   |
|                       |                 |                     |                          |                     |                                                                                                                                                                                                                                                                                                                                                                                                                                                                                                                                                                                                                                                                                                                                                                                                                                                                                                                                                                                                                                                                                                                                                                                                                                                                                                                                                                                                                                                                                                           | 451   | 4E-53   |
|                       |                 |                     |                          |                     |                                                                                                                                                                                                                                                                                                                                                                                                                                                                                                                                                                                                                                                                                                                                                                                                                                                                                                                                                                                                                                                                                                                                                                                                                                                                                                                                                                                                                                                                                                           | 450   | 3E-41   |
|                       |                 |                     |                          |                     |                                                                                                                                                                                                                                                                                                                                                                                                                                                                                                                                                                                                                                                                                                                                                                                                                                                                                                                                                                                                                                                                                                                                                                                                                                                                                                                                                                                                                                                                                                           | 333   | 1E-40   |
|                       |                 |                     |                          |                     |                                                                                                                                                                                                                                                                                                                                                                                                                                                                                                                                                                                                                                                                                                                                                                                                                                                                                                                                                                                                                                                                                                                                                                                                                                                                                                                                                                                                                                                                                                           | 450   | 1E-40   |
| CB604524              | 2.03E-03        | Mo17<B73=F1         | 1.29                     | 11                  | >gb AAR99579.1  60S ribosomal protein L44 [Phalaenopsis hybrid cultivar]                                                                                                                                                                                                                                                                                                                                                                                                                                                                                                                                                                                                                                                                                                                                                                                                                                                                                                                                                                                                                                                                                                                                                                                                                                                                                                                                                                                                                                  | 105   | 4E-40   |

**Table 4. Microarray analysis results, mode of gene action classification, and BLAST annotation for the 1,367 ESTs identified as differentially expressed among genotypes (15% FDR)**

| GenBank accession no. | Overall P value | Significant pattern | Fold change <sup>†</sup> | Sector <sup>‡</sup> | BLAST annotation*                                                                                                                                                                                                                                                                                                                                                                                                                                                                                           | Score | E value |
|-----------------------|-----------------|---------------------|--------------------------|---------------------|-------------------------------------------------------------------------------------------------------------------------------------------------------------------------------------------------------------------------------------------------------------------------------------------------------------------------------------------------------------------------------------------------------------------------------------------------------------------------------------------------------------|-------|---------|
|                       |                 |                     |                          |                     | >ref NP_911994.1  putative 60S ribosomal protein L44 [Oryza sativa (japonica cultivar-group)] dbj BAC15877.1  putative 60S ribosomal protein L44 [Oryza sativa (japonica cultivar-group)]                                                                                                                                                                                                                                                                                                                   | 105   | 5E-40   |
|                       |                 |                     |                          |                     | >gb AAK94425.1  60S ribosomal protein L144 [Brassica rapa subsp. pekinensis]                                                                                                                                                                                                                                                                                                                                                                                                                                | 119   | 4E-39   |
|                       |                 |                     |                          |                     | >ref NP_188981.1  structural constituent of ribosome [Arabidopsis thaliana]ref NP_193168.1  structural constituent of ribosome [Arabidopsis thaliana]                                                                                                                                                                                                                                                                                                                                                       |       |         |
|                       |                 |                     |                          |                     | emb CAB10211.1  ribosomal protein [Arabidopsis thaliana] emb CAB78474.1  ribosomal protein [Arabidopsis thaliana] gb AAM10201.1  ribosomal protein [Arabidopsis thaliana] gb AAL38297.1  ribosomal protein [Arabidopsis thaliana] gb AAL32933.1  60S ribosomal protein L44-like [Arabidopsis thaliana]                                                                                                                                                                                                      |       |         |
|                       |                 |                     |                          |                     | gb AAM63001.1  ribosomal protein [Arabidopsis thaliana] gb AAM61725.1  ribosomal protein [Arabidopsis thaliana] dbj BAB02283.1  60S ribosomal protein L44-like [Arabidopsis thaliana] sp O23290 RL44 ARATH 60S ribosomal protein L44 gb AAN65080.1  60S ribosomal protein L44-like [Arabidopsis thaliana]                                                                                                                                                                                                   | 105   | 3E-38   |
|                       |                 |                     |                          |                     | >gb AAA34366.1  ribosomal protein L41                                                                                                                                                                                                                                                                                                                                                                                                                                                                       | 105   | 3E-38   |
| CB381454              | 2.03E-03        | Mo17<B73=F1         | 1.37                     | 10                  | >dbj BAD32975.1  putative ubiquitin-conjugating enzyme family protein [Oryza sativa(japonica cultivar-group)] dbj BAD33214.1  putative ubiquitin-conjugating enzyme family protein [Oryza sativa (japonica cultivar-group)]                                                                                                                                                                                                                                                                                 | 148   | 3E-70   |
|                       |                 |                     |                          |                     | >gb ABB29951.1  ubiquitin-conjugating enzyme family protein-like [Solanum tuberosum] gb ABA40444.1  ubiquitin-conjugating enzyme family protein-like protein [Solanum tuberosum]                                                                                                                                                                                                                                                                                                                            | 146   | 2E-67   |
|                       |                 |                     |                          |                     | >ref NP_565834.1  ubiquitin conjugating enzyme/ ubiquitin-like activating enzyme[Arabidopsis thaliana] gb AAM13381.1  putative ubiquitin-conjugating enzyme [Arabidopsis thaliana] gb AAD21451.1  E2, ubiquitin-conjugating enzyme, putative [Arabidopsis thaliana] gb AAL32838.1  putative ubiquitin-conjugating enzyme [Arabidopsis thaliana]                                                                                                                                                             | 145   | 2E-66   |
|                       |                 |                     |                          |                     | >ref NP_566968.1  ubiquitin conjugating enzyme/ ubiquitin-like activating enzyme[Arabidopsis thaliana] emb CAB43411.1  putative DNA-binding protein [Arabidopsis thaliana] gb AAL66907.1  unknown protein [Arabidopsis thaliana] gb AAK68786.1  Unknown protein [Arabidopsis thaliana] gb AAM62830.1  E2, ubiquitin-conjugating enzyme, putative [Arabidopsis thaliana]                                                                                                                                     | 146   | 1E-65   |
|                       |                 |                     |                          |                     | >gb ABA26987.1  TO38-23 [Taraxacum officinale]                                                                                                                                                                                                                                                                                                                                                                                                                                                              | 138   | 1E-65   |
| CB331071              | 2.04E-03        | Mo17<B73=F1         | 1.53                     | 10                  | >ref XP_475712.1  putative GTP-binding protein Rab7a [Oryza sativa (japonica cultivar-group)] gb AAT01314.1  putative GTP-binding protein Rab7a [Oryza sativa (japonica cultivar-group)]                                                                                                                                                                                                                                                                                                                    | 206   | 1E-93   |
|                       |                 |                     |                          |                     | >sp Q40787 RAB7 PENCIL Ras-related protein Rab7 (Possible apospory-associated protein)gb AAA85273.1  possible apospory-associated protein                                                                                                                                                                                                                                                                                                                                                                   | 206   | 1E-93   |
|                       |                 |                     |                          |                     | >gb AAO67728.1  small GTP binding protein [Oryza sativa (indica cultivar-group)]                                                                                                                                                                                                                                                                                                                                                                                                                            | 206   | 3E-92   |
|                       |                 |                     |                          |                     | >sp O24461 RAB7 PRUAR Ras-related protein Rab7gb AAB71504.1  Rab7 GTP binding protein [Prunus armeniaca]                                                                                                                                                                                                                                                                                                                                                                                                    | 207   | 2E-86   |
|                       |                 |                     |                          |                     | >emb CAA98171.1  RAB7D [Lotus corniculatus var. japonicus]                                                                                                                                                                                                                                                                                                                                                                                                                                                  | 207   | 6E-86   |
| BM072807              | 2.04E-03        | Mo17<B73=F1         | 2.03                     | 10                  | >ref NP_918332.1  B1110C07.23 [Oryza sativa (japonica cultivar-group)]dbj BAB90622.1  putative zinc finger transcription factor ZFP30 [Oryza sativa (japonica cultivar-group)]                                                                                                                                                                                                                                                                                                                              | 139   | 2E-61   |
|                       |                 |                     |                          |                     | >gb AAZ94630.1  zinc finger protein-like protein [Gossypium hirsutum]                                                                                                                                                                                                                                                                                                                                                                                                                                       | 139   | 2E-33   |
|                       |                 |                     |                          |                     | >ref XP_464544.1  zinc finger transcription factor ZFP30 [Oryza sativa (japonica cultivar-group)] ref XP_507460.1  PREDICTED OJ1135_F06.29 gene product [Oryza sativa (japonica cultivar-group)] ref XP_506755.1  PREDICTED OJ1135_F06.29 gene product [Oryza sativa (japonica cultivar-group)] dbj BAD16000.1  zinc finger transcription factor ZFP30 [Oryza sativa (japonica cultivar-group)] dbj BAD15513.1  zinc finger transcription factor ZFP30 [Oryza sativa (japonica cultivar-group)]             | 166   | 4E-31   |
|                       |                 |                     |                          |                     | >gb AAO46040.1  zinc finger transcription factor ZFP30 [Oryza sativa (japonica cultivar-group)]                                                                                                                                                                                                                                                                                                                                                                                                             | 166   | 2E-30   |
|                       |                 |                     |                          |                     | >gb AAD46926.1  putative zinc finger protein [Oryza sativa]                                                                                                                                                                                                                                                                                                                                                                                                                                                 | 145   | 1E-29   |
| DV490715              | 2.05E-03        | B73<F1=Mo17         | 1.33                     | 3                   | >ref NP_915675.1  putative protein kinase SPK-3 [Oryza sativa (japonica cultivar-group)] dbj BAB89813.1  serine/threonine protein kinase SAPK4 [Oryza sativa (japonica cultivar-group)] dbj BAB64101.1  serine/threonine protein kinase SAPK4 [Oryza sativa (japonica cultivar-group)] dbj BAD18000.1  serine/threonine protein kinase SAPK4 [Oryza sativa (japonica cultivar-group)] sp Q5N942 SAPK4_ORYSA Serine/threonine-protein kinase SAPK4 (Osmotic stress/abscisic acid-activated protein kinase 4) | 360   | 1E-69   |
|                       |                 |                     |                          |                     | >dbj BAD82014.1  serine/threonine protein kinase SAPK4-like protein [Oryza sativa(japonica cultivar-group)] dbj BAD81709.1  serine/threonine protein kinase SAPK4-like protein [Oryza sativa (japonica cultivar-group)]                                                                                                                                                                                                                                                                                     | 168   | 1E-58   |
|                       |                 |                     |                          |                     | >ref XP_472550.1  OSJNBa0084A10.11 [Oryza sativa (japonica cultivar-group)]dbj BAD18003.1  serine/threonine protein kinase SAPK7 [Oryza sativa (japonica cultivar-group)] sp Q7XQP4 SAPK7_ORYSA Serine/threonine-protein kinase SAPK7 (Osmotic stress/abscisic acid-activated protein kinase 7)                                                                                                                                                                                                             | 359   | 8E-58   |
|                       |                 |                     |                          |                     | >emb CAE03037.3  OSJNBa0084A10.12 [Oryza sativa (japonica cultivar-group)]                                                                                                                                                                                                                                                                                                                                                                                                                                  | 407   | 8E-58   |
|                       |                 |                     |                          |                     | >gb AAU43772.1  putative salt-inducible protein kinase [Zea mays]                                                                                                                                                                                                                                                                                                                                                                                                                                           | 364   | 1E-57   |
| CB351711              | 2.07E-03        | B73<F1=Mo17         | 1.52                     | 2                   | >emb CAA42530.1  histone H2B [Triticum aestivum]sp P27807 H2B1 WHEAT Histone H2B                                                                                                                                                                                                                                                                                                                                                                                                                            | 152   | 2E-43   |
|                       |                 |                     |                          |                     | >ref XP_483094.1  putative Histone H2B.2 [Oryza sativa (japonica cultivar-group)]dbj BAD09673.1  putative Histone H2B.2 [Oryza sativa (japonica cultivar-group)]                                                                                                                                                                                                                                                                                                                                            | 150   | 8E-43   |
|                       |                 |                     |                          |                     | >sp P54348 H2B5 MAIZE Histone H2Bgb AAB04688.1  histone H2B                                                                                                                                                                                                                                                                                                                                                                                                                                                 | 154   | 8E-43   |
|                       |                 |                     |                          |                     | >sp P05621 H2B2 WHEAT Histone H2B.2                                                                                                                                                                                                                                                                                                                                                                                                                                                                         | 149   | 2E-42   |
|                       |                 |                     |                          |                     | >ref NP_909263.1  putative histone H2B [Oryza sativa (japonica cultivar-group)]dbj BAB44008.1  putative histone H2B [Oryza sativa (japonica cultivar-group)]                                                                                                                                                                                                                                                                                                                                                | 153   | 2E-42   |
| CB350867              | 2.07E-03        | Mo17<B73=F1         | 1.65                     | 10                  | >ref XP_472424.1  OJ991214_12.11 [Oryza sativa (japonica cultivar-group)]emb CAE01522.1  OJ991214_12.11 [Oryza sativa (japonica cultivar-group)]                                                                                                                                                                                                                                                                                                                                                            | 116   | 4E-25   |
|                       |                 |                     |                          |                     | >ref XP_475631.1  unknown protein [Oryza sativa (japonica cultivar-group)]gb AAV43925.1  unknown protein [Oryza sativa (japonica cultivar-group)]                                                                                                                                                                                                                                                                                                                                                           |       |         |
|                       |                 |                     |                          |                     | gb AAT93913.1  unknown protein [Oryza sativa (japonica cultivar-group)]                                                                                                                                                                                                                                                                                                                                                                                                                                     | 117   | 3E-24   |

**Table 4. Microarray analysis results, mode of gene action classification, and BLAST annotation for the 1,367 ESTs identified as differentially expressed among genotypes (15% FDR)**

| GenBank accession no. | Overall P value | Significant pattern | Fold change <sup>†</sup> | Sector <sup>‡</sup> | BLAST annotation*                                                                                                                                                                                                                                                                                                                                                                                                                                          | Score | E value |
|-----------------------|-----------------|---------------------|--------------------------|---------------------|------------------------------------------------------------------------------------------------------------------------------------------------------------------------------------------------------------------------------------------------------------------------------------------------------------------------------------------------------------------------------------------------------------------------------------------------------------|-------|---------|
|                       |                 |                     |                          |                     | >emb CAH59408.1  hypothetical protein [Plantago major]                                                                                                                                                                                                                                                                                                                                                                                                     | 118   | 6E-20   |
|                       |                 |                     |                          |                     | >dbj BAD82674.1  unknown protein [Oryza sativa (japonica cultivar-group)]                                                                                                                                                                                                                                                                                                                                                                                  | 118   | 2E-19   |
|                       |                 |                     |                          |                     | >ref XP_472425.1  OJ991214_12.12 [Oryza sativa (japonica cultivar-group)]emb CAE01523.2  OJ991214_12.12 [Oryza sativa (japonica cultivar-group)]                                                                                                                                                                                                                                                                                                           | 123   | 2E-18   |
| CB380869              | 2.08E-03        | Mo17<B73=F1         | 1.42                     | 10                  | >emb CAA67225.1  ribosomal protein S21 [Zea mays]sp Q41852 RS21 MAIZE 40S ribosomal protein S21                                                                                                                                                                                                                                                                                                                                                            | 81    | 5E-38   |
|                       |                 |                     |                          |                     | >emb CAA70852.1  40S ribosomal subunit protein S21 [Zea mays]                                                                                                                                                                                                                                                                                                                                                                                              | 81    | 7E-37   |
|                       |                 |                     |                          |                     | >dbj BAA02158.1  40S subunit ribosomal protein [Oryza sativa (japonica cultivar-group)] sp P35687 RS21 ORYZA 40S ribosomal protein S21                                                                                                                                                                                                                                                                                                                     | 82    | 2E-34   |
|                       |                 |                     |                          |                     | >ref XP_469197.1  40S subunit ribosomal protein [Oryza sativa (japonica cultivar-group)] gb AAP44638.1  40S subunit ribosomal protein [Oryza sativa (japonica cultivar-group)]                                                                                                                                                                                                                                                                             | 82    | 5E-34   |
|                       |                 |                     |                          |                     | >gb AAU89141.1  40S ribosomal protein S21, putative [Oryza sativa (japonica cultivar-group)]                                                                                                                                                                                                                                                                                                                                                               | 119   | 8E-33   |
| CD001603              | 2.10E-03        | Mo17<B73=F1         | 1.44                     | 10                  | >gb AAV44171.1  hypothetical protein [Oryza sativa (japonica cultivar-group)]gb AAV43799.1  hypothetical protein [Oryza sativa (japonica cultivar-group)]                                                                                                                                                                                                                                                                                                  | 435   | 7E-39   |
|                       |                 |                     |                          |                     | >ref NP_190735.1  transporter [Arabidopsis thaliana]emb CAB63153.1  putative protein [Arabidopsis thaliana] gb AAL31927.1  AT3g51670/T18N14_50 [Arabidopsis thaliana] gb AAN73306.1  At3g51670/T18N14_50 [Arabidopsis thaliana] sp Q9SCU1 PATL6 ARATH Patellin-6                                                                                                                                                                                           | 409   | 4E-25   |
|                       |                 |                     |                          |                     | >emb CAB43521.1  hypothetical protein [Arabidopsis thaliana]                                                                                                                                                                                                                                                                                                                                                                                               | 147   | 4E-25   |
|                       |                 |                     |                          |                     | >gb AAV59419.1  putative cellular retinaldehyde-binding/triple function [Oryza sativa (japonica cultivar-group)] ref XP_475265.1  putative cellular retinaldehyde-binding/triple function [Oryza sativa (japonica cultivar-group)]                                                                                                                                                                                                                         | 585   | 2E-15   |
|                       |                 |                     |                          |                     | >emb CAB95829.1  hypothetical protein [Cicer arietinum]                                                                                                                                                                                                                                                                                                                                                                                                    | 482   | 3E-14   |
| CB886363              | 2.11E-03        | Mo17<B73=F1         | 1.3                      | 11                  | >gb AAT42201.1  gibberellin-stimulated protein [Oryza sativa (japonica cultivar-group)]                                                                                                                                                                                                                                                                                                                                                                    | 110   | 3E-34   |
|                       |                 |                     |                          |                     | >dbj BAD54389.1  putative gibberellin induced protein 3 [Oryza sativa (japonica cultivar-group)] dbj BAD53514.1  putative gibberellin induced protein 3 [Oryza sativa (japonica cultivar-group)]                                                                                                                                                                                                                                                           | 84    | 3E-34   |
|                       |                 |                     |                          |                     | >gb AAW83819.1  GASA2-like protein [Pelargonium zonale]                                                                                                                                                                                                                                                                                                                                                                                                    | 117   | 8E-28   |
|                       |                 |                     |                          |                     | >emb CAD10105.1  Gip1-like protein [Petunia x hybrida]                                                                                                                                                                                                                                                                                                                                                                                                     | 105   | 1E-27   |
|                       |                 |                     |                          |                     | >emb CAD10106.1  Gip1-like protein [Petunia x hybrida]                                                                                                                                                                                                                                                                                                                                                                                                     | 104   | 2E-27   |
| CB351684              | 2.12E-03        | Mo17<B73=F1         | 1.3                      | 10                  | >dbj BAD68228.1  leucine-rich repeat protein [Oryza sativa (japonica cultivar-group)] gb AAO85403.1  leucine-rich repeat protein [Oryza sativa] gb AAO85402.1  leucine-rich repeat protein [Oryza sativa]                                                                                                                                                                                                                                                  | 213   | 1E-84   |
|                       |                 |                     |                          |                     | >gb AAO17321.1  floral organ regulator 1 [Oryza sativa (japonica cultivar-group)]                                                                                                                                                                                                                                                                                                                                                                          | 213   | 1E-81   |
|                       |                 |                     |                          |                     | >gb AAP23944.1  leucine-rich repeat protein [x Citrofornella mitis]                                                                                                                                                                                                                                                                                                                                                                                        | 228   | 1E-74   |
|                       |                 |                     |                          |                     | >ref NP_197608.1  protein binding [Arabidopsis thaliana]gb AAM10104.1  unknown protein [Arabidopsis thaliana] gb AAP13376.1  AT5g21090 [Arabidopsis thaliana] gb AAG40341.1  AT5g21090 [Arabidopsis thaliana] gb AAK48970.1  Unknown protein [Arabidopsis thaliana] gb AAO73897.1  leucine rich repeat protein (LRP), putative [Arabidopsis thaliana] gb AAO00877.1  Unknown protein [Arabidopsis thaliana]                                                | 218   | 2E-72   |
|                       |                 |                     |                          |                     | >emb CAA64565.1  LRR protein [Lycopersicon esculentum]                                                                                                                                                                                                                                                                                                                                                                                                     | 221   | 3E-71   |
| CD001573              | 2.16E-03        | Mo17<B73=F1         | 1.4                      | 11                  | >emb CAB90214.1  putative elongation factor 1 beta [Hordeum vulgare subsp. vulgare]                                                                                                                                                                                                                                                                                                                                                                        | 226   | 6E-40   |
|                       |                 |                     |                          |                     | >gb AAR15081.1  translational elongation factor 1 subunit Bbeta [Pisum sativum]                                                                                                                                                                                                                                                                                                                                                                            | 231   | 4E-39   |
|                       |                 |                     |                          |                     | >ref XP_479153.1  elongation factor 1 beta [Oryza sativa (japonica cultivar-group)]ref XP_506463.1  PREDICTED P0616D06.117 gene product [Oryza sativa (japonica cultivar-group)] dbj BAC16499.1  elongation factor 1 beta [Oryza sativa (japonica cultivar-group)] dbj BAA04903.1  elongation factor 1 beta [Oryza sativa (japonica cultivar-group)] sp Q40680 EF1D ORYZA Elongation factor 1-delta (EF-1-delta) (Elongation factor 1B-beta) (eEF-1B beta) | 229   | 2E-38   |
|                       |                 |                     |                          |                     | >gb AAU89237.1  elongation factor 1 beta 2 [Oryza sativa (japonica cultivar-group)]dbj BAA34599.1  elongation factor 1 beta 2 [Oryza sativa (japonica cultivar-group)] dbj BAA34598.1  elongation factor 1 beta 2 [Oryza sativa (japonica cultivar-group)]                                                                                                                                                                                                 | 226   | 2E-38   |
|                       |                 |                     |                          |                     | >gb ABA81875.1  putative elongation factor 1B alpha-subunit0like [Solanum tuberosum] gb ABA40427.1  unknown [Solanum tuberosum]                                                                                                                                                                                                                                                                                                                            | 227   | 5E-38   |
|                       |                 |                     |                          |                     | >ref XP_463248.1  calcineurin B protein [Oryza sativa (japonica cultivar-group)]gb AAR01663.1  calcineurin B protein [Oryza sativa (japonica cultivar-group)]                                                                                                                                                                                                                                                                                              | 225   | 3E-51   |
| DV943290              | 2.16E-03        | B73=Mo17<F1         | 1.41                     | 1                   | gb ABA54178.1  calcineurin B-like protein 3 [Oryza sativa (japonica cultivar-group)] gb AAL31695.1  putative calcineurin B-like protein [Oryza sativa]                                                                                                                                                                                                                                                                                                     | 225   | 5E-51   |
|                       |                 |                     |                          |                     | >gb AAM91028.2  calcineurin B [Pisum sativum]gb AAW73072.1  calcineurin B-like protein [Pisum sativum]                                                                                                                                                                                                                                                                                                                                                     | 225   | 1E-49   |
|                       |                 |                     |                          |                     | >gb ABA54177.1  calcineurin B-like protein 2 [Oryza sativa (japonica cultivar-group)]                                                                                                                                                                                                                                                                                                                                                                      | 225   | 1E-49   |
|                       |                 |                     |                          |                     | >gb AAZ20387.1  calcineurin B-like protein 3 [Gossypium hirsutum]                                                                                                                                                                                                                                                                                                                                                                                          | 226   | 2E-49   |
|                       |                 |                     |                          |                     | >ref NP_200410.1  CBL2; calcium ion binding [Arabidopsis thaliana]gb AAM98114.1  At5g55990/MDA7_3 [Arabidopsis thaliana] gb AAK96497.1  AT5g55990/MDA7_3 [Arabidopsis thaliana] dbj BAB09281.1  calcineurin B-like protein 2 [Arabidopsis thaliana] gb AAC26009.1  calcineurin B-like protein 2 [Arabidopsis thaliana] sp Q8LAS7 CNBL2 ARATH Calcineurin B-like protein 2 (SOS3-like calcium-binding protein 1)                                            | 226   | 2E-49   |
|                       |                 |                     |                          |                     | >gb AAL76334.1  putative G-box binding protein [Oryza sativa]dbj BAD45657.1  G-box binding protein-like [Oryza sativa (japonica cultivar-group)]                                                                                                                                                                                                                                                                                                           |       |         |
| BM074404              | 2.16E-03        | Mo17<B73=F1         | 3.33                     | 10                  | gb AAB65433.1  HvB12D homolog [Oryza sativa]                                                                                                                                                                                                                                                                                                                                                                                                               | 89    | 5E-22   |
|                       |                 |                     |                          |                     | >emb CAA70936.1  B12Dg1 [Hordeum vulgare subsp. vulgare]emb CAA54065.1  HvB12D [Hordeum vulgare subsp. vulgare]                                                                                                                                                                                                                                                                                                                                            | 87    | 3E-21   |
|                       |                 |                     |                          |                     | >gb AAD22104.1  B12D protein [Ipomoea batatas]                                                                                                                                                                                                                                                                                                                                                                                                             | 90    | 4E-17   |
|                       |                 |                     |                          |                     | >ref XP_477421.1  putative B12D protein [Oryza sativa (japonica cultivar-group)]dbj BAC84633.1  putative B12D protein [Oryza sativa (japonica cultivar-group)]                                                                                                                                                                                                                                                                                             |       |         |
|                       |                 |                     |                          |                     | dbj BAD31625.1  putative B12D protein [Oryza sativa (japonica cultivar-group)]                                                                                                                                                                                                                                                                                                                                                                             | 98    | 4E-15   |

**Table 4. Microarray analysis results, mode of gene action classification, and BLAST annotation for the 1,367 ESTs identified as differentially expressed among genotypes (15% FDR)**

| GenBank accession no. | Overall P value | Significant pattern | Fold change <sup>±</sup> | Sector <sup>±</sup> | BLAST annotation*                                                                                                                                                                                                                                                                                                                                                                                                                                                          | Score | E value |
|-----------------------|-----------------|---------------------|--------------------------|---------------------|----------------------------------------------------------------------------------------------------------------------------------------------------------------------------------------------------------------------------------------------------------------------------------------------------------------------------------------------------------------------------------------------------------------------------------------------------------------------------|-------|---------|
| DV489637              | 2.16E-03        | Mo17<B73=F1         | 1.76                     | 10                  | >ref NP_190397.1  unknown protein [Arabidopsis thaliana]emb CAB51061.1  B12D-like protein [Arabidopsis thaliana] gb AAL91215.1  B12D-like protein [Arabidopsis thaliana] gb AAN65070.1  B12D-like protein [Arabidopsis thaliana] pir [T13003 hypothetical protein T24C20.20 - Arabidopsis thaliana                                                                                                                                                                         | 88    | 4E-14   |
|                       |                 |                     |                          |                     | >sp Q43199 APT1 WHEAT Adenine phosphoribosyltransferase 1 (APRT)gb AAA80609.1  adenine phosphoribosyltransferase form 1                                                                                                                                                                                                                                                                                                                                                    | 181   | 7E-53   |
|                       |                 |                     |                          |                     | >dbj BAB08003.1  Adenine phosphoribosyltransferase [Hordeum vulgare subsp. vulgare]                                                                                                                                                                                                                                                                                                                                                                                        | 181   | 9E-53   |
|                       |                 |                     |                          |                     | >gb ABA99757.1  adenine phosphoribosyltransferase, putative [Oryza sativa (japonica cultivar-group)]                                                                                                                                                                                                                                                                                                                                                                       | 240   | 5E-50   |
|                       |                 |                     |                          |                     | >gb AAP85303.1  adenine phosphoribosyltransferase [Brassica napus]                                                                                                                                                                                                                                                                                                                                                                                                         | 204   | 1E-47   |
|                       |                 |                     |                          |                     | >gb ABB86271.1  adenine phosphoribosyltransferase-like [Solanum tuberosum]                                                                                                                                                                                                                                                                                                                                                                                                 | 182   | 2E-46   |
| BM073281              | 2.18E-03        | F1=Mo17<B73         | 1.58                     | 9                   | >ref XP_463908.1  ubiquitin-conjugating enzyme [Oryza sativa (japonica cultivar-group)] dbj BAD07595.1  ubiquitin-conjugating enzyme [Oryza sativa (japonica cultivar-group)] gb BAD08135.1  ubiquitin-conjugating enzyme [Oryza sativa (japonica cultivar-group)]                                                                                                                                                                                                         | 148   | 3E-50   |
|                       |                 |                     |                          |                     | >gb AAL99225.1  ubiquitin-conjugating enzyme E2 [Gossypium raimondii]gb AAL99224.1  ubiquitin-conjugating enzyme E2 [Gossypium thurberi]                                                                                                                                                                                                                                                                                                                                   | 148   | 4E-48   |
|                       |                 |                     |                          |                     | >gb AAF24583.1  F22C12.2 [Arabidopsis thaliana]                                                                                                                                                                                                                                                                                                                                                                                                                            | 146   | 6E-48   |
|                       |                 |                     |                          |                     | >gb AAL99223.1  ubiquitin-conjugating enzyme E2 [Gossypium arboreum]                                                                                                                                                                                                                                                                                                                                                                                                       | 148   | 6E-48   |
|                       |                 |                     |                          |                     | >ref NP_001031228.1  ubiquitin conjugating enzyme/ ubiquitin-like activating enzyme [Arabidopsis thaliana] ref NP_564828.1  ubiquitin conjugating enzyme/ ubiquitin-like activating enzyme [Arabidopsis thaliana] gb AAM91500.1  At1g64230/F22C12_17 [Arabidopsis thaliana] gb AAM11574.1  ubiquitin conjugating enzyme UBC9A [Arabidopsis thaliana] gb AAK60309.1  At1g64230/F22C12_17 [Arabidopsis thaliana] gb AAY44867.1  ubiquitinating enzyme [Arabidopsis thaliana] | 148   | 6E-48   |
|                       |                 |                     |                          |                     | >ref NP_922639.1  putative pectin acetyltransferase [Oryza sativa (japonica cultivar-group)] gb AAG13483.1  putative pectin acetyltransferase [Oryza sativa (japonica cultivar-group)] dbj AAP54926.1  pectin acetyltransferase, putative [Oryza sativa (japonica cultivar-group)]                                                                                                                                                                                         | 394   | 3E-32   |
| DV490850              | 2.20E-03        | Mo17<B73=F1         | 9.32                     | 10                  | >gb AAG50747.1  pectinacetyltransferase precursor, putative [Arabidopsis thaliana]                                                                                                                                                                                                                                                                                                                                                                                         | 417   | 1E-22   |
|                       |                 |                     |                          |                     | >gb AAM74495.1  At1g57590/T8L23_6 [Arabidopsis thaliana]                                                                                                                                                                                                                                                                                                                                                                                                                   | 423   | 1E-22   |
|                       |                 |                     |                          |                     | >ref NP_176072.3  carboxylic ester hydrolase [Arabidopsis thaliana]                                                                                                                                                                                                                                                                                                                                                                                                        | 444   | 1E-22   |
|                       |                 |                     |                          |                     | >ref NP_182216.1  carboxylic ester hydrolase [Arabidopsis thaliana]gb AAC34238.1  putative pectinesterase [Arabidopsis thaliana] gb AAK96575.1  At2g46930/F14M4.24 [Arabidopsis thaliana]                                                                                                                                                                                                                                                                                  | 416   | 3E-21   |
|                       |                 |                     |                          |                     | >ref XP_481935.1  unknown protein [Oryza sativa (japonica cultivar-group)]dbj BAD03782.1  unknown protein [Oryza sativa (japonica cultivar-group)]                                                                                                                                                                                                                                                                                                                         | 534   | 2E-40   |
|                       |                 |                     |                          |                     | >dbj BAD82496.1  unknown protein [Oryza sativa (japonica cultivar-group)]                                                                                                                                                                                                                                                                                                                                                                                                  | 489   | 6E-34   |
| DV621305              | 2.22E-03        | B73<F1=Mo17         | 1.38                     | 3                   | >ref NP_917044.1  similar to Arabidopsis thaliana chromosome 1, At1g15060 [Oryzasativa (japonica cultivar-group)]                                                                                                                                                                                                                                                                                                                                                          | 595   | 6E-34   |
|                       |                 |                     |                          |                     | >emb CAA03956.1  unnamed protein product [Hordeum vulgare subsp. vulgare]                                                                                                                                                                                                                                                                                                                                                                                                  | 108   | 7E-32   |
|                       |                 |                     |                          |                     | >dbj BAD44209.1  unknown protein [Arabidopsis thaliana]                                                                                                                                                                                                                                                                                                                                                                                                                    | 394   | 2E-29   |
|                       |                 |                     |                          |                     | >gb AAO86709.1  tonoplast water channel [Zea mays]gb AAC09245.1  tonoplast intrinsic protein; ZmTIP1 [Zea mays]                                                                                                                                                                                                                                                                                                                                                            | 250   | 2E-57   |
|                       |                 |                     |                          |                     | >emb CAA56553.1  gamma-TIP-like protein [Hordeum vulgare subsp. vulgare]                                                                                                                                                                                                                                                                                                                                                                                                   | 250   | 3E-55   |
|                       |                 |                     |                          |                     | >gb AAD10494.1  gamma-type tonoplast intrinsic protein [Triticum aestivum]                                                                                                                                                                                                                                                                                                                                                                                                 | 250   | 3E-55   |
| CB605123              | 2.23E-03        | B73<F1=Mo17         | 1.44                     | 3                   | >ref XP_470213.1  Tonoplast intrinsic protein [Oryza sativa]gb AAK98737.1  Tonoplast intrinsic protein [Oryza sativa] dbj BAA05017.1  gamma-Tip [Oryza sativa] sp P50156 TIP11 ORYSA Probable aquaporin TIP1.1 (Tonoplast intrinsic protein 1.1) (OsTIP1.1) (rTIP1)                                                                                                                                                                                                        | 250   | 3E-54   |
|                       |                 |                     |                          |                     | >gb AAX14478.1  putative tonoplast intrinsic protein [Gossypium hirsutum]                                                                                                                                                                                                                                                                                                                                                                                                  | 137   | 1E-50   |
|                       |                 |                     |                          |                     | >dbj BAD73480.1  putative ribosomal protein L37a [Oryza sativa (japonica cultivar-group)]                                                                                                                                                                                                                                                                                                                                                                                  | 92    | 5E-47   |
|                       |                 |                     |                          |                     | >ref XP_475898.1  putative 60S ribosomal protein L37a [Oryza sativa (japonica cultivar-group)] gb AAT58714.1  putative 60S ribosomal protein L37a [Oryza sativa (japonica cultivar-group)]                                                                                                                                                                                                                                                                                 | 95    | 2E-46   |
|                       |                 |                     |                          |                     | >ref NP_916930.1  putative 60S ribosomal protein L37a [Oryza sativa (japonica cultivar-group)]                                                                                                                                                                                                                                                                                                                                                                             | 122   | 2E-46   |
|                       |                 |                     |                          |                     | >emb CAI48073.1  60S ribosomal protein L37a [Capsicum chinense]                                                                                                                                                                                                                                                                                                                                                                                                            | 92    | 1E-45   |
| CD650982              | 2.25E-03        | Mo17<B73=F1         | 1.28                     | 10                  | >emb CAA10493.1  ribosomal protein L37A [Pseudotsuga menziesii]sp Q9ZRS8 RL37A PSEMZ 60S ribosomal protein L37a                                                                                                                                                                                                                                                                                                                                                            | 92    | 3E-45   |
|                       |                 |                     |                          |                     | >gb AAN77294.1  Unknown protein [Oryza sativa (japonica cultivar-group)]                                                                                                                                                                                                                                                                                                                                                                                                   | 91    | 2E-11   |
|                       |                 |                     |                          |                     | >ref XP_482545.1  unknown protein [Oryza sativa (japonica cultivar-group)]dbj BAD09833.1  unknown protein [Oryza sativa (japonica cultivar-group)]                                                                                                                                                                                                                                                                                                                         | 250   | 2E-36   |
|                       |                 |                     |                          |                     | >ref NP_173724.2  unknown protein [Arabidopsis thaliana]gb AAT68719.1  hypothetical protein At1g23110 [Arabidopsis thaliana]                                                                                                                                                                                                                                                                                                                                               | 248   | 3E-35   |
|                       |                 |                     |                          |                     | >gb AAX23759.1  hypothetical protein At1g23110 [Arabidopsis thaliana]                                                                                                                                                                                                                                                                                                                                                                                                      | 248   | 2E-34   |
|                       |                 |                     |                          |                     | >gb AAM66974.1  unknown [Arabidopsis thaliana]                                                                                                                                                                                                                                                                                                                                                                                                                             | 244   | 1E-33   |
| BM073678              | 2.25E-03        | F1=Mo17<B73         | 1.56                     | 9                   | >ref NP_565005.1  unknown protein [Arabidopsis thaliana]gb AAL85049.1  unknown protein [Arabidopsis thaliana] gb AAK93674.1  unknown protein [Arabidopsis thaliana] gb AAD55506.1  Unknown protein [Arabidopsis thaliana]                                                                                                                                                                                                                                                  | 244   | 1E-33   |
|                       |                 |                     |                          |                     | >ref XP_477253.1  putative Sec13p [Oryza sativa (japonica cultivar-group)]dbj BAD31963.1  putative Sec13p [Oryza sativa (japonica cultivar-group)]                                                                                                                                                                                                                                                                                                                         | 315   | 4E-70   |
|                       |                 |                     |                          |                     | dbj BAC82934.1  putative Sec13p [Oryza sativa (japonica cultivar-group)]                                                                                                                                                                                                                                                                                                                                                                                                   |       |         |
|                       |                 |                     |                          |                     | >ref NP_909967.1  putative coat protein complex II (COPII) component [Oryza sativa(japonica cultivar-group)] gb AAP46251.1  putative protein-transport protein [Oryza sativa (japonica cultivar-group)] gb AAO39855.1  putative coat protein complex II (COPII) component [Oryza sativa (japonica cultivar-group)]                                                                                                                                                         | 301   | 8E-63   |
|                       |                 |                     |                          |                     |                                                                                                                                                                                                                                                                                                                                                                                                                                                                            |       |         |
|                       |                 |                     |                          |                     |                                                                                                                                                                                                                                                                                                                                                                                                                                                                            |       |         |
| DV489748              | 2.26E-03        | F1=Mo17<B73         | 1.5                      | 9                   | ns                                                                                                                                                                                                                                                                                                                                                                                                                                                                         |       |         |
| CB381614              | 2.27E-03        | Mo17<B73=F1         | 1.36                     | 11                  | >ref XP_477253.1  putative Sec13p [Oryza sativa (japonica cultivar-group)]dbj BAD31963.1  putative Sec13p [Oryza sativa (japonica cultivar-group)]                                                                                                                                                                                                                                                                                                                         | 315   | 4E-70   |
|                       |                 |                     |                          |                     | >ref NP_173724.2  unknown protein [Arabidopsis thaliana]gb AAT68719.1  hypothetical protein At1g23110 [Arabidopsis thaliana]                                                                                                                                                                                                                                                                                                                                               | 248   | 3E-35   |
|                       |                 |                     |                          |                     | >gb AAX23759.1  hypothetical protein At1g23110 [Arabidopsis thaliana]                                                                                                                                                                                                                                                                                                                                                                                                      | 248   | 2E-34   |
|                       |                 |                     |                          |                     | >gb AAM66974.1  unknown [Arabidopsis thaliana]                                                                                                                                                                                                                                                                                                                                                                                                                             | 244   | 1E-33   |
|                       |                 |                     |                          |                     | >ref NP_565005.1  unknown protein [Arabidopsis thaliana]gb AAL85049.1  unknown protein [Arabidopsis thaliana] gb AAK93674.1  unknown protein [Arabidopsis thaliana] gb AAD55506.1  Unknown protein [Arabidopsis thaliana]                                                                                                                                                                                                                                                  | 244   | 1E-33   |
|                       |                 |                     |                          |                     | >ref XP_477253.1  putative Sec13p [Oryza sativa (japonica cultivar-group)]dbj BAD31963.1  putative Sec13p [Oryza sativa (japonica cultivar-group)]                                                                                                                                                                                                                                                                                                                         | 315   | 4E-70   |
| CD670257              | 2.27E-03        | Mo17<B73=F1         | 1.57                     | 10                  | dbj BAC82934.1  putative Sec13p [Oryza sativa (japonica cultivar-group)]                                                                                                                                                                                                                                                                                                                                                                                                   |       |         |
|                       |                 |                     |                          |                     | >ref NP_909967.1  putative coat protein complex II (COPII) component [Oryza sativa(japonica cultivar-group)] gb AAP46251.1  putative protein-transport protein [Oryza sativa (japonica cultivar-group)] gb AAO39855.1  putative coat protein complex II (COPII) component [Oryza sativa (japonica cultivar-group)]                                                                                                                                                         | 301   | 8E-63   |
|                       |                 |                     |                          |                     |                                                                                                                                                                                                                                                                                                                                                                                                                                                                            |       |         |

**Table 4. Microarray analysis results, mode of gene action classification, and BLAST annotation for the 1,367 ESTs identified as differentially expressed among genotypes (15% FDR)**

| GenBank accession no. | Overall P value | Significant pattern | Fold change <sup>†</sup> | Sector <sup>‡</sup> | BLAST annotation*                                                                                                                                                                                                                                                                                                                                                                                                                                                     | Score | E value |
|-----------------------|-----------------|---------------------|--------------------------|---------------------|-----------------------------------------------------------------------------------------------------------------------------------------------------------------------------------------------------------------------------------------------------------------------------------------------------------------------------------------------------------------------------------------------------------------------------------------------------------------------|-------|---------|
|                       |                 |                     |                          |                     | >ref NP_180566.1  nucleotide binding [Arabidopsis thaliana]gb AAM70557.1  At2g30050/F23F1.3 [Arabidopsis thaliana] gb AAM14986.1  putative protein transport protein SEC13 [Arabidopsis thaliana] gb AAC16967.1  putative protein transport protein SEC13 [Arabidopsis thaliana] gb AAL06565.1  At2g30050/F23F1.3 [Arabidopsis thaliana]                                                                                                                              | 302   | 2E-50   |
|                       |                 |                     |                          |                     | >ref NP_186783.1  nucleotide binding [Arabidopsis thaliana]ref NP_001030616.1  nucleotide binding [Arabidopsis thaliana] gb AAF03492.1  putative protein transport protein SEC13 [Arabidopsis thaliana] gb AAL34253.1  putative transport protein SEC13 [Arabidopsis thaliana] gb AAK44077.1  putative transport protein SEC13 [Arabidopsis thaliana]                                                                                                                 | 302   | 3E-50   |
|                       |                 |                     |                          |                     | >gb AAM65095.1  putative protein transport protein SEC13 [Arabidopsis thaliana]                                                                                                                                                                                                                                                                                                                                                                                       | 302   | 6E-49   |
| DV489676              | 2.28E-03        | Mo17<B73=F1         | 6.36                     | 10                  | >ref XP_473874.1  OSJNBa0070C17.22 [Oryza sativa (japonica cultivar-group)]emb CAE05215.3  OSJNBa0070C17.22 [Oryza sativa (japonica cultivar-group)]                                                                                                                                                                                                                                                                                                                  | 438   | 1E-25   |
| DV491736              | 2.29E-03        | Mo17<B73=F1         | 1.61                     | 11                  | >dbj BAD73259.1  unknown protein [Oryza sativa (japonica cultivar-group)]dbj BAD73143.1  unknown protein [Oryza sativa (japonica cultivar-group)]                                                                                                                                                                                                                                                                                                                     | 266   | 8E-32   |
|                       |                 |                     |                          |                     | >ref NP_918653.1  P0520B06.19 [Oryza sativa (japonica cultivar-group)]                                                                                                                                                                                                                                                                                                                                                                                                | 258   | 8E-32   |
|                       |                 |                     |                          |                     | >ref NP_192449.1  unknown protein [Arabidopsis thaliana]ref NP_001031586.1  unknown protein [Arabidopsis thaliana] emb CAB81082.1  putative protein [Arabidopsis thaliana] gb AAQ62419.1  At4g05400 [Arabidopsis thaliana] dbj BAD43333.1  putative protein [Arabidopsis thaliana]                                                                                                                                                                                    | 250   | 1E-20   |
|                       |                 |                     |                          |                     | >ref NP_193846.1  unknown protein [Arabidopsis thaliana]emb CAB79114.1  hypothetical protein [Arabidopsis thaliana] emb CAA17533.1  hypothetical protein [Arabidopsis thaliana]                                                                                                                                                                                                                                                                                       | 228   | 2E-19   |
| DV494333              | 2.31E-03        | B73=Mo17<F1         | 1.34                     | 12                  | >dbj BAC78592.1  pre-mRNA splicing factor [Oryza sativa (japonica cultivar-group)]                                                                                                                                                                                                                                                                                                                                                                                    | 232   | 3E-15   |
|                       |                 |                     |                          |                     | >gb ABA99674.1  RNA recognition motif. (a.k.a. RRM, RBD, or RNP domain), putative[Oryza sativa (japonica cultivar-group)]                                                                                                                                                                                                                                                                                                                                             | 263   | 3E-15   |
|                       |                 |                     |                          |                     | >ref XP_464852.1  putative pre-mRNA splicing factor [Oryza sativa (japonica cultivar-group)] ref XP_506764.1  PREDICTED OJ1113_G05.32 gene product [Oryza sativa (japonica cultivar-group)] gb AAG43284.2  pre-mRNA splicing factor [Oryza sativa (japonica cultivar-group)] dbj BAD19762.1  putative pre-mRNA splicing factor [Oryza sativa (japonica cultivar-group)] dbj BAD19168.1  putative pre-mRNA splicing factor [Oryza sativa (japonica cultivar-group)]    | 265   | 1E-14   |
|                       |                 |                     |                          |                     | >gb AAX95358.1  hypothetical protein [Oryza sativa (japonica cultivar-group)]                                                                                                                                                                                                                                                                                                                                                                                         | 384   | 2E-6    |
|                       |                 |                     |                          |                     | >gb AAX95271.1  RNA recognition motif. (a.k.a. RRM, RBD, or RNP domain), putative[Oryza sativa (japonica cultivar-group)] gb ABA95508.1  RNA recognition motif. (a.k.a. RRM, RBD, or RNP domain), putative [Oryza sativa (japonica cultivar-group)]                                                                                                                                                                                                                   | 502   | 2E-6    |
| CD670200              | 2.33E-03        | Mo17<B73=F1         | 1.29                     | 10                  | >ref NP_909904.1  putative clathrin assembly protein [Oryza sativa]gb AAL35902.1  clathrin assembly protein AP19-like protein [Oryza sativa] gb AAK72894.1  putative clathrin assembly protein [Oryza sativa]                                                                                                                                                                                                                                                         | 182   | 2E-85   |
|                       |                 |                     |                          |                     | >gb AAB39510.1  AP-1 Golgi-related complex component; clathrin coated vesicles;clathrin assembly protein                                                                                                                                                                                                                                                                                                                                                              | 161   | 5E-81   |
|                       |                 |                     |                          |                     | >ref NP_565415.1  AP19 [Arabidopsis thaliana]gb AAM61683.1  clathrin assembly small subunit protein AP19 [Arabidopsis thaliana] gb AAB86515.1  clathrin assembly protein AP19, small subunit [Arabidopsis thaliana]                                                                                                                                                                                                                                                   | 161   | 7E-80   |
|                       |                 |                     |                          |                     | >ref NP_195267.1  unknown protein [Arabidopsis thaliana]emb CAB80258.1  clathrin assembly protein AP19 homolog [Arabidopsis thaliana] emb CAA18728.1  clathrin assembly protein AP19 homolog [Arabidopsis thaliana] gb AAM64317.1  clathrin assembly protein AP19 homolog [Arabidopsis thaliana] gb AAO50497.1  putative clathrin assembly protein AP19 homolog [Arabidopsis thaliana] dbj BAC43580.1  putative clathrin assembly protein AP19 [Arabidopsis thaliana] | 162   | 2E-79   |
|                       |                 |                     |                          |                     | gb AAB96889.1  clathrin assembly protein AP19 homolog [Arabidopsis thaliana]                                                                                                                                                                                                                                                                                                                                                                                          | 161   | 3E-79   |
|                       |                 |                     |                          |                     | >gb AAB96888.1  clathrin assembly protein AP19 homolog [Arabidopsis thaliana]gb AAB96887.1  clathrin assembly protein AP19 [Arabidopsis thaliana]                                                                                                                                                                                                                                                                                                                     | 152   | 4E-77   |
| CB329753              | 2.34E-03        | B73=Mo17<F1         | 1.35                     | 12                  | >sp P23346 SODC5 MAIZE Superoxide dismutase [Cu-Zn] 4AP                                                                                                                                                                                                                                                                                                                                                                                                               | 152   | 4E-76   |
|                       |                 |                     |                          |                     | >emb CAB57992.1  superoxide dismutase-4AP [Zea mays]sp P23345 SODC4 MAIZE Superoxide dismutase [Cu-Zn] 4A                                                                                                                                                                                                                                                                                                                                                             | 152   | 5E-75   |
|                       |                 |                     |                          |                     | >emb CAB57993.1  superoxide dismutase-4A [Zea mays]gb AAB49913.1  superoxide dismutase 4A                                                                                                                                                                                                                                                                                                                                                                             | 152   | 8E-71   |
|                       |                 |                     |                          |                     | >sp P28757 SODC2_ORYSA Superoxide dismutase [Cu-Zn] 2gb AAC14465.1  cytosolic copper/zinc-superoxide dismutase [Oryza sativa] dbj BAA00800.1  copper/zinc-superoxide dismutase [Oryza sativa (japonica cultivar-group)]                                                                                                                                                                                                                                               | 152   | 9E-70   |
|                       |                 |                     |                          |                     | >gb AAY56345.1  cytoplasmic copper/zinc-superoxide dismutase [Oryza sativa (indicacultivar-group)] sp P28756 SODC1_ORYSA Superoxide dismutase [Cu-Zn] 1 gb AAC14464.1  cytosolic copper/zinc-superoxide dismutase [Oryza sativa] dbj BAA00799.1  copper/zinc-superoxide dismutase [Oryza sativa (japonica cultivar-group)] prf 2111424A Cu/Zn superoxide dismutase                                                                                                    | 152   | 9E-70   |
| DV493630              | 2.34E-03        | B73<F1=Mo17         | 2.21                     | 3                   | >ref XP_506961.1  PREDICTED P0516G10.12-1 gene product [Oryza sativa (japonica cultivar-group)] ref XP_467707.1  putative proline-rich protein APG [Oryza sativa (japonica cultivar-group)] dbj BAD15755.1  putative proline-rich protein APG [Oryza sativa (japonica cultivar-group)]                                                                                                                                                                                | 383   | 1E-36   |
|                       |                 |                     |                          |                     | >gb ABA99589.1  GDSL-like Lipase/Acylhydrolase, putative [Oryza sativa (japonica cultivar-group)]                                                                                                                                                                                                                                                                                                                                                                     | 402   | 2E-35   |
|                       |                 |                     |                          |                     | >dbj BAD61697.1  GDSL-lipase-like [Oryza sativa (japonica cultivar-group)]                                                                                                                                                                                                                                                                                                                                                                                            | 381   | 2E-28   |
|                       |                 |                     |                          |                     | >dbj BAD28139.1  putative anter-specific proline-rich protein APG [Oryza sativa(japonica cultivar-group)] dbj BAD28305.1  putative anter-specific proline-rich protein APG [Oryza sativa (japonica cultivar-group)]                                                                                                                                                                                                                                                   | 362   | 4E-27   |
|                       |                 |                     |                          |                     | >ref XP_463902.1  putative GDSL-motif lipase/hydrolase protein [Oryza sativa(japonica cultivar-group)] dbj BAD08129.1  putative GDSL-motif lipase/hydrolase protein [Oryza sativa (japonica cultivar-group)]                                                                                                                                                                                                                                                          | 378   | 3E-26   |
| DV621336              | 2.35E-03        | B73=F1<Mo17         | 1.34                     | 4                   | >gb AAO72607.1  putative ubiquitin-specific protease [Oryza sativa (japonica cultivar-group)]                                                                                                                                                                                                                                                                                                                                                                         | 842   | 9E-33   |
|                       |                 |                     |                          |                     | >dbj BAD72518.1  putative ubiquitin-specific protease 23 [Oryza sativa (japonica cultivar-group)]                                                                                                                                                                                                                                                                                                                                                                     | 874   | 9E-33   |
|                       |                 |                     |                          |                     | >dbj BAD72517.1  putative ubiquitin-specific protease 23 [Oryza sativa (japonica cultivar-group)]                                                                                                                                                                                                                                                                                                                                                                     | 899   | 9E-33   |
|                       |                 |                     |                          |                     | >dbj BAD11338.1  BR11-KD interacting protein 110 [Oryza sativa (japonica cultivar-group)]                                                                                                                                                                                                                                                                                                                                                                             | 517   | 9E-33   |
|                       |                 |                     |                          |                     | >ref XP_468249.1  putative hematopoietic-specific IL-2 deubiquitinating enzyme [Oryzasativa (japonica cultivar-group)] dbj BAD19267.1  putative hematopoietic-specific IL-2 deubiquitinating enzyme [Oryza sativa (japonica cultivar-group)]                                                                                                                                                                                                                          | 1185  | 4E-19   |



**Table 4. Microarray analysis results, mode of gene action classification, and BLAST annotation for the 1,367 ESTs identified as differentially expressed among genotypes (15% FDR)**

| GenBank accession no. | Overall P value | Significant pattern | Fold change <sup>†</sup> | Sector <sup>‡</sup> | BLAST annotation*                                                                                                                                                                                                                                                                                                                                                                                                                                                                                                                                                                                                                                                                                                                                                                                                                                                                                                                                                                                                                                                                                                                                                                                                     | Score                             | E value                                   |
|-----------------------|-----------------|---------------------|--------------------------|---------------------|-----------------------------------------------------------------------------------------------------------------------------------------------------------------------------------------------------------------------------------------------------------------------------------------------------------------------------------------------------------------------------------------------------------------------------------------------------------------------------------------------------------------------------------------------------------------------------------------------------------------------------------------------------------------------------------------------------------------------------------------------------------------------------------------------------------------------------------------------------------------------------------------------------------------------------------------------------------------------------------------------------------------------------------------------------------------------------------------------------------------------------------------------------------------------------------------------------------------------|-----------------------------------|-------------------------------------------|
| DV495488              | 2.36E-03        | Mo17<B73=F1         | 1.57                     | 11                  | ns                                                                                                                                                                                                                                                                                                                                                                                                                                                                                                                                                                                                                                                                                                                                                                                                                                                                                                                                                                                                                                                                                                                                                                                                                    |                                   |                                           |
| DV551158              | 2.38E-03        | B73<F1=Mo17         | 1.65                     | 3                   | >emb CAA49199.1  alanine aminotransferase [Panicum miliaceum]sp P34106 ALA2_PANMI Alanine aminotransferase 2 (GPT) (Glutamic--pyruvic transaminase 2) (Glutamic--alanine transaminase 2) (ALAAT-2)<br>>gb AAC62456.1  alanine aminotransferase [Zea mays]<br>>ref NP_921266.1  putative alanine aminotransferase [Oryza sativa (japonica cultivar-group)] gb AAK52114.1  Putative alanine aminotransferase [Oryza sativa (japonica cultivar-group)]<br>>gb ABB47494.1  alanine aminotransferase [Oryza sativa (japonica cultivar-group)]dbj BAA77261.1  alanine aminotransferase [Oryza sativa] dbj BAA77260.1  alanine aminotransferase [Oryza sativa]<br>>emb CAA81231.1  alanine aminotransferase [Hordeum vulgare subsp. vulgare]sp P52894 ALA2_HORVU Alanine aminotransferase 2 (GPT) (Glutamic--pyruvic transaminase 2) (Glutamic--alanine transaminase 2) (ALAAT-2)                                                                                                                                                                                                                                                                                                                                            | 482<br>482<br>484<br>483<br>482   | 4E-17<br>6E-16<br>6E-15<br>6E-15<br>1E-14 |
| DV491016              | 2.38E-03        | Mo17<B73=F1         | 1.6                      | 10                  | >ref XP_466921.1  putative ubiquitin-conjugating enzyme E2 [Oryza sativa (japonica cultivar-group)] dbj BAD25314.1  putative ubiquitin-conjugating enzyme E2 [Oryza sativa (japonica cultivar-group)] dbj BAD25096.1  putative ubiquitin-conjugating enzyme E2 [Oryza sativa (japonica cultivar-group)]<br>>ref NP_001031939.1  ubiquitin conjugating enzyme/ ubiquitin-like activating enzyme [Arabidopsis thaliana] ref NP_568476.1  ubiquitin conjugating enzyme/ ubiquitin-like activating enzyme [Arabidopsis thaliana] gb AAM60888.1  E2, ubiquitin-conjugating enzyme, putative [Arabidopsis thaliana] gb AAV44861.1  ubiquitinating enzyme [Arabidopsis thaliana]<br>>ref XP_643940.1  hypothetical protein DDB0167874 [Dictyostelium discoideum]gb AAO51851.1  similar to Arabidopsis thaliana (Mouse-ear cress). E2, ubiquitin-conjugating enzyme, putative [Dictyostelium discoideum] gb EAL70049.1  hypothetical protein DDB0167874 [Dictyostelium discoideum]<br>>gb AAN16047.1  ubiquitin-conjugating enzyme E2 [Pavlova lutheri]<br>>emb CAI74825.1  ubiquitin-conjugating enzyme e2, putative [Theileria annulata]ref XP_952557.1  ubiquitin-conjugating enzyme E2 [Theileria annulata strain Ankara] | 157<br>157<br>149<br>166<br>157   | 2E-74<br>2E-71<br>2E-46<br>5E-45<br>6E-43 |
| CB240136              | 2.42E-03        | F1=Mo17<B73         | 1.36                     | 9                   | ns                                                                                                                                                                                                                                                                                                                                                                                                                                                                                                                                                                                                                                                                                                                                                                                                                                                                                                                                                                                                                                                                                                                                                                                                                    |                                   |                                           |
| DV491385              | 2.42E-03        | Mo17<B73=F1         | 3.81                     | 10                  | >ref NP_915308.1  putative GDSL-motif lipase/hydrolase [Oryza sativa (japonica cultivar-group)] dbj BAB68101.1  putative family II lipase EXL1 [Oryza sativa (japonica cultivar-group)]<br>>ref XP_475407.1  putative GDSL-motif lipase/hydrolase [Oryza sativa (japonica cultivar-group)] gb AAT47006.1  putative GDSL-motif lipase/hydrolase [Oryza sativa (japonica cultivar-group)]<br>>gb AAM64923.1  proline-rich protein, putative [Arabidopsis thaliana]<br>>ref NP_176139.1  RXF26; carboxylic ester hydrolase/ hydrolase, acting on ester bonds [Arabidopsis thaliana] gb AAG50646.1  proline-rich protein, putative [Arabidopsis thaliana] dbj BAB83874.1  prolin-rich protein [Arabidopsis thaliana]<br>>dbj BAA88267.1  RXF26 [Arabidopsis thaliana]                                                                                                                                                                                                                                                                                                                                                                                                                                                     | 350<br>360<br>360<br>360<br>360   | 6E-63<br>7E-34<br>7E-34<br>7E-34<br>2E-33 |
| BM075185              | 2.42E-03        | Mo17<B73=F1         | 2.03                     | 10                  | ns                                                                                                                                                                                                                                                                                                                                                                                                                                                                                                                                                                                                                                                                                                                                                                                                                                                                                                                                                                                                                                                                                                                                                                                                                    |                                   |                                           |
| CB833451              | 2.44E-03        | Mo17<B73=F1         | 1.21                     | 10                  | >gb AAU10802.1  'putative endo-1,3;1,4-beta-D-glucanase' [Oryza sativa (japonica cultivar-group)]<br>>gb AAU10803.1  'putative endo-1,3;1,4-beta-D-glucanase' [Oryza sativa (japonica cultivar-group)]<br>>ref NP_566731.1  hydrolase [Arabidopsis thaliana]gb AAK48958.1  Unknown protein [Arabidopsis thaliana]<br>>dbj BAB02775.1  unnamed protein product [Arabidopsis thaliana]<br>>gb AAN65058.1  Unknown protein [Arabidopsis thaliana]                                                                                                                                                                                                                                                                                                                                                                                                                                                                                                                                                                                                                                                                                                                                                                        | 240<br>239<br>239<br>232<br>239   | 2E-54<br>1E-48<br>7E-41<br>7E-41<br>7E-41 |
| BM079816              | 2.44E-03        | Mo17<B73=F1         | 1.56                     | 10                  | ns                                                                                                                                                                                                                                                                                                                                                                                                                                                                                                                                                                                                                                                                                                                                                                                                                                                                                                                                                                                                                                                                                                                                                                                                                    |                                   |                                           |
| BG841386              | 2.45E-03        | Mo17<B73=F1         | 1.69                     | 10                  | >dbj BAD52953.1  unknown protein [Oryza sativa (japonica cultivar-group)]<br>>dbj BAD52952.1  unknown protein [Oryza sativa (japonica cultivar-group)]<br>>ref NP_916345.1  P0490D09.22 [Oryza sativa (japonica cultivar-group)]                                                                                                                                                                                                                                                                                                                                                                                                                                                                                                                                                                                                                                                                                                                                                                                                                                                                                                                                                                                      | 783<br>895<br>1194                | 9E-9<br>9E-9<br>9E-9                      |
| DV621246              | 2.46E-03        | B73=F1<Mo17         | 1.41                     | 4                   | >ref XP_474777.1  OSJNBa0040D17.13 [Oryza sativa (japonica cultivar-group)]emb CAE04544.2  OSJNBa0040D17.13 [Oryza sativa (japonica cultivar-group)]<br>>ref NP_921690.1  putative ABC transporter [Oryza sativa (japonica cultivar-group)]<br>>gb ABB47709.1  ABC transporter, putative [Oryza sativa (japonica cultivar-group)]gb ABB47708.1  ABC transporter, putative [Oryza sativa (japonica cultivar-group)]<br>>gb AAX95832.1  ABC transporter-like protein [Oryza sativa (japonica cultivar-group)]<br>>gb AAX92830.1  hypothetical protein LOC_Os11g22350 [Oryza sativa (japonica cultivar-group)] gb ABA93154.1  hypothetical protein LOC_Os11g22350 [Oryza sativa (japonica cultivar-group)]                                                                                                                                                                                                                                                                                                                                                                                                                                                                                                               | 964<br>908<br>897<br>1101<br>1073 | 2E-90<br>1E-65<br>1E-65<br>3E-64<br>3E-64 |
| BM078695              | 2.51E-03        | Mo17<B73=F1         | 1.32                     | 11                  | >gb AAV31238.1  putative 26S proteasome non-ATPase regulatory subunit 14 [Oryzasativa (japonica cultivar-group)]<br>>ref NP_912909.1  unnamed protein product [Oryza sativa (japonica cultivar-group)]dbj BAA88535.1  putative Pad1 [Oryza sativa (japonica cultivar-group)]<br>dbj BAB78489.1  26S proteasome regulatory particle non-ATPase subunit11 [Oryza sativa (japonica cultivar-group)]<br>>ref NP_197745.1  unknown protein [Arabidopsis thaliana]gb AAP86672.1  26S proteasome subunit RPN11 [Arabidopsis thaliana] gb AAP86671.1  26S proteasome subunit RPN11a [Arabidopsis thaliana] gb AAP86670.1  26S proteasome subunit RPN11A [Arabidopsis thaliana] gb AAM14268.1  putative 26S proteasome, non-ATPase regulatory subunit [Arabidopsis thaliana] gb AAL49768.1  putative 26S proteasome, non-ATPase regulatory subunit [Arabidopsis thaliana] dbj BAA97246.1  26S proteasome, non-ATPase regulatory subunit [Arabidopsis thaliana] sp Q9LT08 PSDE_ARATH 26S proteasome non-ATPase regulatory subunit 14 (26S proteasome regulatory subunit rpn11)                                                                                                                                                  | 307<br>307<br>307<br>1101<br>308  | 2E-50<br>8E-50<br>2E-50<br>3E-64<br>5E-47 |

**Table 4. Microarray analysis results, mode of gene action classification, and BLAST annotation for the 1,367 ESTs identified as differentially expressed among genotypes (15% FDR)**

| GenBank accession no. | Overall P value | Significant pattern | Fold change <sup>†</sup> | Sector <sup>‡</sup> | BLAST annotation*                                                                                                                                                                                                                                                                                                                                                                                                                                   | Score | E value |
|-----------------------|-----------------|---------------------|--------------------------|---------------------|-----------------------------------------------------------------------------------------------------------------------------------------------------------------------------------------------------------------------------------------------------------------------------------------------------------------------------------------------------------------------------------------------------------------------------------------------------|-------|---------|
|                       |                 |                     |                          |                     | >gb AAM64349.1  26S proteasome non-ATPase regulatory subunit [Arabidopsis thaliana]                                                                                                                                                                                                                                                                                                                                                                 | 308   | 5E-47   |
|                       |                 |                     |                          |                     | >ref XP_780027.1  PREDICTED: similar to proteasome (prosome, macropain) 26S subunit,non-ATPase, 14 isoform 1 [Strongylocentrotus purpuratus]                                                                                                                                                                                                                                                                                                        | 311   | 1E-32   |
| DV622044              | 2.52E-03        | B73<F1=Mo17         | 1.54                     | 3                   | >ref XP_480594.1  hypothetical protein [Oryza sativa (japonica cultivar-group)]dbj BAD05323.1  hypothetical protein [Oryza sativa (japonica cultivar-group)]                                                                                                                                                                                                                                                                                        | 128   | 7E-36   |
|                       |                 |                     |                          |                     | >ref XP_469591.1  expressed protein [Oryza sativa (japonica cultivar-group)]gb AAR01643.1  expressed protein [Oryza sativa (japonica cultivar-group)]                                                                                                                                                                                                                                                                                               | 95    | 1E-35   |
|                       |                 |                     |                          |                     | >ref NP_568055.1  unknown protein [Arabidopsis thaliana]                                                                                                                                                                                                                                                                                                                                                                                            | 86    | 2E-25   |
|                       |                 |                     |                          |                     | >gb AAM62578.1  unknown [Arabidopsis thaliana]                                                                                                                                                                                                                                                                                                                                                                                                      | 86    | 4E-25   |
|                       |                 |                     |                          |                     | >ref NP_187208.1  unknown protein [Arabidopsis thaliana]gb AAR923113.1  At3g05570 [Arabidopsis thaliana] gb AAF26140.1  unknown protein [Arabidopsis thaliana] gb AAR24155.1  At3g05570 [Arabidopsis thaliana]                                                                                                                                                                                                                                      | 90    | 1E-23   |
| CAB829827             | 2.53E-03        | Mo17<B73=F1         | 1.34                     | 10                  | >gb ABB02647.1  unknown [Solanum tuberosum]gb ABA46758.1  unknown [Solanum tuberosum]                                                                                                                                                                                                                                                                                                                                                               | 130   | 2E-66   |
|                       |                 |                     |                          |                     | >ref NP_973783.1  RPS15A (RIBOSOMAL PROTEIN S15A); structural constituent of ribosome[Arabidopsis thaliana] ref NP_172256.1  RPS15A (RIBOSOMAL PROTEIN S15A); structural constituent of ribosome [Arabidopsis thaliana] ref NP_200793.1  structural constituent of ribosome [Arabidopsis thaliana]                                                                                                                                                  |       |         |
|                       |                 |                     |                          |                     | gb AAN31818.1  putative cytoplasmic ribosomal protein S15a [Arabidopsis thaliana] gb AAG48810.1  putative ribosomal protein S15 [Arabidopsis thaliana]                                                                                                                                                                                                                                                                                              |       |         |
|                       |                 |                     |                          |                     | gb AAL34202.1  putative cytoplasmic ribosomal protein S15a [Arabidopsis thaliana] gb AAK93717.1  putative ribosomal protein S15 [Arabidopsis thaliana]                                                                                                                                                                                                                                                                                              |       |         |
|                       |                 |                     |                          |                     | gb AAK59661.1  putative cytoplasmic ribosomal protein S15a [Arabidopsis thaliana] gb AAK25994.1  putative ribosomal protein S15 [Arabidopsis thaliana]                                                                                                                                                                                                                                                                                              |       |         |
|                       |                 |                     |                          |                     | gb AAM10251.1  similar to 40S ribosomal protein S15a [Arabidopsis thaliana] gb AAM10034.1  similar to 40S ribosomal protein S15a [Arabidopsis thaliana]                                                                                                                                                                                                                                                                                             |       |         |
|                       |                 |                     |                          |                     | gb AAK68770.1  Putative 40S ribosomal protein S15A [Arabidopsis thaliana] gb AAK62367.1  40S ribosomal protein S15A [Arabidopsis thaliana]                                                                                                                                                                                                                                                                                                          | 130   | 2E-66   |
|                       |                 |                     |                          |                     | >emb CAA42599.1  r-protein BnS15a [Brassica napus]sp Q00332 RS15A BRANA 40S ribosomal protein S15a (PPCB8)                                                                                                                                                                                                                                                                                                                                          | 130   | 6E-66   |
|                       |                 |                     |                          |                     | >dbj BAA89231.1  wrp15a [Citrus aurantium]                                                                                                                                                                                                                                                                                                                                                                                                          | 130   | 1E-65   |
|                       |                 |                     |                          |                     | >ref NP_190190.1  structural constituent of ribosome [Arabidopsis thaliana]emb CAB90931.1  cytoplasmic ribosomal protein S15a-like [Arabidopsis thaliana]                                                                                                                                                                                                                                                                                           |       |         |
|                       |                 |                     |                          |                     | gb AAM14312.1  putative cytoplasmic ribosomal protein S15a [Arabidopsis thaliana] gb AAK76511.1  putative cytoplasmic ribosomal protein S15a [Arabidopsis thaliana]                                                                                                                                                                                                                                                                                 | 130   | 2E-65   |
| DV942741              | 2.54E-03        | F1=Mo17<B73         | 1.76                     | 9                   | >gb AAV64237.1  putative alanine aminotransferase [Zea mays]                                                                                                                                                                                                                                                                                                                                                                                        | 516   | 6E-47   |
|                       |                 |                     |                          |                     | >gb AAV64199.1  putative alanine aminotransferase [Zea mays]                                                                                                                                                                                                                                                                                                                                                                                        | 516   | 1E-46   |
|                       |                 |                     |                          |                     | >ref XP_479171.1  putative alanine aminotransferase [Oryza sativa (japonica cultivar-group)] dbj BAC79995.1  putative alanine aminotransferase [Oryza sativa (japonica cultivar-group)] dbj BAC79866.1  putative alanine aminotransferase [Oryza sativa (japonica cultivar-group)]                                                                                                                                                                  | 486   | 2E-45   |
|                       |                 |                     |                          |                     | >emb CAA49199.1  alanine aminotransferase [Panicum miliaceum]sp P34106 ALA2_PANMI Alanine aminotransferase 2 (GPT) (Glutamic--pyruvic transaminase 2) (Glutamic--alanine transaminase 2) (ALAAAT-2)                                                                                                                                                                                                                                                 | 482   | 4E-41   |
|                       |                 |                     |                          |                     | >gb AAK59591.2  putative alanine aminotransferase [Arabidopsis thaliana]                                                                                                                                                                                                                                                                                                                                                                            | 532   | 4E-40   |
| CD484747              | 2.55E-03        | Mo17<B73=F1         | 1.37                     | 10                  | >ref XP_464690.1  Elongation factor 1-gamma [Oryza sativa (japonica cultivar-group)]dbj BAD17615.1  Elongation factor 1-gamma [Oryza sativa (japonica cultivar-group)] sp Q9ZRI7 EF1G ORYSA Elongation factor 1-gamma (EF-1-gamma) (eEF-1-gamma) dbj BAA34206.1  elongation factor 1B gamma [Oryza sativa (japonica cultivar-group)]                                                                                                                | 418   | 5E-86   |
|                       |                 |                     |                          |                     | >gb AAO72574.1  elongation factor 1 gamma-like protein [Oryza sativa (japonica cultivar-group)]                                                                                                                                                                                                                                                                                                                                                     | 409   | 1E-85   |
|                       |                 |                     |                          |                     | >ref XP_464689.1  putative elongation factor 1-gamma [Oryza sativa (japonica cultivar-group)] dbj BAD17614.1  putative elongation factor 1-gamma [Oryza sativa (japonica cultivar-group)]                                                                                                                                                                                                                                                           | 414   | 1E-85   |
|                       |                 |                     |                          |                     | >gb AAO72563.1  elongation factor 1 gamma-like protein [Oryza sativa (japonica cultivar-group)]                                                                                                                                                                                                                                                                                                                                                     | 413   | 8E-85   |
|                       |                 |                     |                          |                     | >dbj BAD61932.1  putative elongation factor 1 gamma [Oryza sativa (japonica cultivar-group)] dbj BAD61828.1  putative elongation factor 1 gamma [Oryza sativa (japonica cultivar-group)]                                                                                                                                                                                                                                                            | 416   | 8E-85   |
| DV492787              | 2.55E-03        | B73<F1=Mo17         | 1.78                     | 3                   | >dbj BAD45275.1  putative 24 kDa seed maturation protein [Oryza sativa (japonica cultivar-group)]                                                                                                                                                                                                                                                                                                                                                   | 265   | 3E-38   |
|                       |                 |                     |                          |                     | >gb ABB51093.1  reticulon [Hordeum vulgare]                                                                                                                                                                                                                                                                                                                                                                                                         | 204   | 5E-38   |
|                       |                 |                     |                          |                     | >dbj BAD27895.1  putative 24 kDa seed maturation protein [Oryza sativa (japonica cultivar-group)]                                                                                                                                                                                                                                                                                                                                                   | 230   | 8E-36   |
|                       |                 |                     |                          |                     | >ref NP_913448.1  P0492F05.25 [Oryza sativa (japonica cultivar-group)]dbj BAB32723.1  unknown protein [Oryza sativa (japonica cultivar-group)]                                                                                                                                                                                                                                                                                                      | 279   | 7E-26   |
|                       |                 |                     |                          |                     | dbj BAB92114.1  unknown protein [Oryza sativa (japonica cultivar-group)]                                                                                                                                                                                                                                                                                                                                                                            |       |         |
|                       |                 |                     |                          |                     | >ref NP_192861.1  unknown protein [Arabidopsis thaliana]emb CAB81223.1  putative protein [Arabidopsis thaliana] emb CAB51406.1  putative protein [Arabidopsis thaliana] gb AAK59408.1  unknown protein [Arabidopsis thaliana] gb AAL14401.1  AT4g11220/F8L21_10 [Arabidopsis thaliana] gb AAK82535.1  AT4g11220/F8L21_10 [Arabidopsis thaliana] gb AAM64366.1  unknown [Arabidopsis thaliana] gb AAN86201.1  unknown protein [Arabidopsis thaliana] | 271   | 1E-24   |
| DV495145              | 2.56E-03        | Mo17<B73=F1         | 1.46                     | 11                  | ns                                                                                                                                                                                                                                                                                                                                                                                                                                                  |       |         |
| DV494154              | 2.57E-03        | B73<F1=Mo17         | 1.74                     | 2                   | >gb AAF13094.1  unknown protein [Arabidopsis thaliana]gb AAF21186.1  unknown protein [Arabidopsis thaliana]                                                                                                                                                                                                                                                                                                                                         | 196   | 3E-26   |
|                       |                 |                     |                          |                     | >ref NP_566319.1  unknown protein [Arabidopsis thaliana]ref NP_850538.1  unknown protein [Arabidopsis thaliana] gb AAL47395.1  unknown protein [Arabidopsis thaliana] gb AAL16180.1  At3g07760/F17A17.10 [Arabidopsis thaliana] gb AAK96782.1  Unknown protein [Arabidopsis thaliana] gb AAM66036.1  unknown [Arabidopsis thaliana]                                                                                                                 | 125   | 3E-26   |
|                       |                 |                     |                          |                     | >gb ABA99120.1  AC009176 putative heat-shock protein [Oryza sativa (japonica cultivar-group)]                                                                                                                                                                                                                                                                                                                                                       | 1210  | 4E-7    |
| CD527707              | 2.60E-03        | Mo17<B73=F1         | 1.43                     | 10                  | >gb AAU44063.1  hypothetical protein [Oryza sativa (japonica cultivar-group)]                                                                                                                                                                                                                                                                                                                                                                       | 207   | 1E-52   |
|                       |                 |                     |                          |                     | >dbj BAD87014.1  RING zinc finger protein-like [Oryza sativa (japonica cultivar-group)]                                                                                                                                                                                                                                                                                                                                                             | 197   | 4E-48   |
|                       |                 |                     |                          |                     | >ref NP_916004.1  OSJNB0021A09.3 [Oryza sativa (japonica cultivar-group)]                                                                                                                                                                                                                                                                                                                                                                           | 238   | 4E-48   |

**Table 4. Microarray analysis results, mode of gene action classification, and BLAST annotation for the 1,367 ESTs identified as differentially expressed among genotypes (15% FDR)**

| GenBank accession no. | Overall P value | Significant pattern | Fold change <sup>†</sup> | Sector <sup>‡</sup> | BLAST annotation*                                                                                                                                                                                                                                                                                                                                                                                                                                                                                                                                                                                                              | Score | E value |
|-----------------------|-----------------|---------------------|--------------------------|---------------------|--------------------------------------------------------------------------------------------------------------------------------------------------------------------------------------------------------------------------------------------------------------------------------------------------------------------------------------------------------------------------------------------------------------------------------------------------------------------------------------------------------------------------------------------------------------------------------------------------------------------------------|-------|---------|
|                       |                 |                     |                          |                     | >ref NP_182139.1  protein binding / ubiquitin-protein ligase/ zinc ion binding[Arabidopsis thaliana] gb AAC62890.1  hypothetical protein [Arabidopsis thaliana] gb AAL69457.1  At2g46160/T3F17.19 [Arabidopsis thaliana] sp O82353 ATL2M ARATH RING-H2 finger protein ATL2M                                                                                                                                                                                                                                                                                                                                                    | 214   | 2E-38   |
|                       |                 |                     |                          |                     | >ref NP_191714.1  protein binding / ubiquitin-protein ligase/ zinc ion binding[Arabidopsis thaliana] emb CAB71085.1  putative protein [Arabidopsis thaliana] dbj BAD95337.1  hypothetical protein [Arabidopsis thaliana] gb AAMS1602.1  AT3g61550/F2A19_150 [Arabidopsis thaliana] gb AAL16112.1  AT3g61550/F2A19_150 [Arabidopsis thaliana] sp Q9M313 ATL3K ARATH RING-H2 finger protein ATL3K                                                                                                                                                                                                                                | 212   | 3E-36   |
| BM338902              | 2.61E-03        | Mo17<B73=F1         | 4.53                     | 10                  | >gb AAT94020.1  unknown protein [Oryza sativa (japonica cultivar-group)]gb AAT93960.1  unknown protein [Oryza sativa (japonica cultivar-group)]                                                                                                                                                                                                                                                                                                                                                                                                                                                                                | 316   | 5E-12   |
| CB604485              | 2.63E-03        | Mo17<B73=F1         | 1.54                     | 11                  | ns                                                                                                                                                                                                                                                                                                                                                                                                                                                                                                                                                                                                                             |       |         |
| CD573493              | 2.65E-03        | Mo17<B73=F1         | 1.28                     | 10                  | >gb AAV36518.1  vacuolar ATPase subunit c isoform [Pennisetum glaucum]gb AAL08022.1  vacuolar H+-ATPase 16 kDa proteolipid subunit c [Pennisetum glaucum]                                                                                                                                                                                                                                                                                                                                                                                                                                                                      | 165   | 2E-44   |
|                       |                 |                     |                          |                     | >gb AAK91135.1  V-ATPase subunit c [Porteresia coarctata]gb ABA95923.1  V-type ATPase, C subunit [Oryza sativa (japonica cultivar-group)]                                                                                                                                                                                                                                                                                                                                                                                                                                                                                      | 165   | 2E-44   |
|                       |                 |                     |                          |                     | >gb AAX93004.1  V-type ATPase, C subunit, putative [Oryza sativa (japonica cultivar-group)] sp Q40635 VATL_ORYSA Vacuolar ATP synthase 16 kDa proteolipid subunit gb ABA91617.1  V-type ATPase, C subunit, putative [Oryza sativa (japonica cultivar-group)] gb AAA68175.1  H+-ATPase                                                                                                                                                                                                                                                                                                                                          | 165   | 2E-44   |
|                       |                 |                     |                          |                     | >gb AAU44174.1  putative vacuolar ATP synthase 16 kDa proteolipid subunit [Oryzasativa (japonica cultivar-group)]                                                                                                                                                                                                                                                                                                                                                                                                                                                                                                              | 166   | 6E-44   |
|                       |                 |                     |                          |                     | >ref XP_466150.1  putative Vacuolar ATP synthase 16 kDa proteolipid subunit [Oryzasativa (japonica cultivar-group)] dbj BAD33262.1  putative Vacuolar ATP synthase 16 kDa proteolipid subunit [Oryza sativa (japonica cultivar-group)] dbj BAD16200.1  putative Vacuolar ATP synthase 16 kDa proteolipid subunit [Oryza sativa (japonica cultivar-group)]                                                                                                                                                                                                                                                                      | 167   | 6E-44   |
| BM338817              | 2.66E-03        | Mo17<B73=F1         | 9.79                     | 10                  | ns                                                                                                                                                                                                                                                                                                                                                                                                                                                                                                                                                                                                                             |       |         |
| BG840897              | 2.67E-03        | F1=Mo17<B73         | 1.57                     | 9                   | >ref XP_468227.1  putative tumor differentially expressed protein 1 [Oryza sativa(japonica cultivar-group)] ref XP_507542.1  PREDICTED OJ1249_F12.26 gene product [Oryza sativa (japonica cultivar-group)] ref XP_507541.1  PREDICTED OJ1249_F12.26 gene product [Oryza sativa (japonica cultivar-group)] ref XP_507023.1  PREDICTED OJ1249_F12.26 gene product [Oryza sativa (japonica cultivar-group)] dbj BAD19186.1  putative tumor differentially expressed protein 1 [Oryza sativa (japonica cultivar-group)] dbj BAD19654.1  putative tumor differentially expressed protein 1 [Oryza sativa (japonica cultivar-group)] | 414   | 3E-41   |
|                       |                 |                     |                          |                     | >ref NP_173069.1  unknown protein [Arabidopsis thaliana]gb AAF18512.1  Contains similarity to gb AF181686 membrane protein TMS1d from Drosophila melanogaster. ESTs gb R64994, gb A1994832, gb Z47674 come from this gene. [Arabidopsis thaliana]                                                                                                                                                                                                                                                                                                                                                                              | 412   | 8E-37   |
|                       |                 |                     |                          |                     | >ref XP_468965.1  putative membrane protein [Oryza sativa (japonica cultivar-group)]gb AAO73245.1  putative membrane protein [Oryza sativa (japonica cultivar-group)]                                                                                                                                                                                                                                                                                                                                                                                                                                                          | 417   | 5E-28   |
|                       |                 |                     |                          |                     | >gb AAF30310.1  hypothetical protein [Arabidopsis thaliana]                                                                                                                                                                                                                                                                                                                                                                                                                                                                                                                                                                    | 315   | 8E-26   |
|                       |                 |                     |                          |                     | >dbj BAD94992.1  hypothetical protein [Arabidopsis thaliana]                                                                                                                                                                                                                                                                                                                                                                                                                                                                                                                                                                   | 57    | 8E-26   |
| BM334653              | 2.68E-03        | F1=Mo17<B73         | 1.39                     | 9                   | >emb CAA68419.1  ribulose 1,5-bisphosphate carboxylase/oxygenase [Zea mays]                                                                                                                                                                                                                                                                                                                                                                                                                                                                                                                                                    | 169   | 2E-9    |
|                       |                 |                     |                          |                     | >emb CAA29784.1  ribulose-1,5-bisphosphate carboxylase (RuBPC) precursor [Zea mays]sp P05348 RBS_MAIZE Ribulose bisphosphate carboxylase small chain, chloroplast precursor (RuBisCO small subunit) dbj BAA00120.1  ribulose 1,5-bisphosphate carboxylase small subunit [Zea mays] prf 1312317A                                                                                                                                                                                                                                                                                                                                |       |         |
|                       |                 |                     |                          |                     | ribulosebisphosphate carboxylase                                                                                                                                                                                                                                                                                                                                                                                                                                                                                                                                                                                               | 170   | 2E-9    |
|                       |                 |                     |                          |                     | >emb CAA70416.1  rubisco small subunit [Zea mays]                                                                                                                                                                                                                                                                                                                                                                                                                                                                                                                                                                              | 170   | 1E-8    |
|                       |                 |                     |                          |                     | >gb AAF06100.1  ribulose 1,5-bisphosphate carboxylase small chain precursor[Manihot esculenta]                                                                                                                                                                                                                                                                                                                                                                                                                                                                                                                                 | 184   | 3E-6    |
|                       |                 |                     |                          |                     | >gb AAF06101.1  ribulose 1,5-bisphosphate carboxylase small chain precursor[Manihot esculenta] gb AAF06098.1  ribulose 1,5-bisphosphate carboxylase small chain precursor [Manihot esculenta]                                                                                                                                                                                                                                                                                                                                                                                                                                  | 184   | 3E-6    |
| CB815525              | 2.69E-03        | F1=Mo17<B73         | 1.89                     | 9                   | >emb CAA82751.1  protein kinase C inhibitor [Zea mays]sp P42856 ZB14 MAIZE 14 kDa zinc-binding protein (Protein kinase C inhibitor) (PKCI)                                                                                                                                                                                                                                                                                                                                                                                                                                                                                     | 128   | 4E-51   |
|                       |                 |                     |                          |                     | >sp P42855 ZB14 BRAJU 14 kDa zinc-binding protein (Protein kinase C inhibitor) (PKCI)gb AAA18397.1  putative protein kinase C inhibitor                                                                                                                                                                                                                                                                                                                                                                                                                                                                                        | 113   | 2E-43   |
|                       |                 |                     |                          |                     | >emb CAB88052.1  protein kinase C inhibitor-like protein [Arabidopsis thaliana]gb AAK76535.1  putative protein kinase C inhibitor [Arabidopsis thaliana] gb AAM63920.1  protein kinase C inhibitor-like protein [Arabidopsis thaliana]                                                                                                                                                                                                                                                                                                                                                                                         | 129   | 5E-43   |
|                       |                 |                     |                          |                     | >ref NP_567038.1  protein kinase C binding / zinc ion binding [Arabidopsis thaliana]gb AAN86189.1  putative protein kinase C inhibitor [Arabidopsis thaliana]                                                                                                                                                                                                                                                                                                                                                                                                                                                                  | 147   | 5E-43   |
|                       |                 |                     |                          |                     | >gb ABC75370.1  Histidine triad (HIT) protein [Medicago truncatula]                                                                                                                                                                                                                                                                                                                                                                                                                                                                                                                                                            | 182   | 2E-38   |
| CD001379              | 2.72E-03        | Mo17<B73=F1         | 1.32                     | 10                  | >ref XP_468756.1  putative ribosomal protein S19 [Oryza sativa (japonicacultivar-group)] ref XP_468752.1  putative ribosomal protein S19 [Oryza sativa (japonica cultivar-group)] gb AAP20855.1  putative ribosomal protein S19 [Oryza sativa (japonica cultivar-group)] gb AAP20842.1  putative ribosomal protein S19 [Oryza sativa (japonica cultivar-group)] sp P40978 RS19 ORYSA 40S ribosomal protein S19                                                                                                                                                                                                                 | 146   | 1E-70   |
|                       |                 |                     |                          |                     | >gb AAW34237.1  putative ribosomal protein S19 [Oryza sativa (japonicacultivar-group)]                                                                                                                                                                                                                                                                                                                                                                                                                                                                                                                                         | 144   | 6E-68   |
|                       |                 |                     |                          |                     | >gb AAW34236.1  putative ribosomal protein S19 [Oryza sativa (japonicacultivar-group)]                                                                                                                                                                                                                                                                                                                                                                                                                                                                                                                                         | 166   | 4E-67   |
|                       |                 |                     |                          |                     | >gb AAW34240.1  putative ribosomal protein S19 [Oryza sativa (japonicacultivar-group)]                                                                                                                                                                                                                                                                                                                                                                                                                                                                                                                                         | 122   | 2E-60   |
|                       |                 |                     |                          |                     | >gb ABB87116.1  40S ribosomal protein S19-like [Solanum tuberosum]                                                                                                                                                                                                                                                                                                                                                                                                                                                                                                                                                             | 143   | 4E-60   |
| DV550717              | 2.73E-03        | B73<F1=Mo17         | 1.69                     | 2                   | >ref XP_464513.1  putative BRI1-KD interacting protein [Oryza sativa (japonicacultivar-group)] dbj BAD15848.1  putative BRI1-KD interacting protein [Oryza sativa (japonica cultivar-group)]                                                                                                                                                                                                                                                                                                                                                                                                                                   | 395   | 3E-37   |
|                       |                 |                     |                          |                     | >dbj BAD11346.1  BRI1-KD interacting protein 118 [Oryza sativa (japonicacultivar-group)]                                                                                                                                                                                                                                                                                                                                                                                                                                                                                                                                       | 334   | 3E-37   |
|                       |                 |                     |                          |                     | >dbj BAD36112.1  BRI1-KD interacting protein 118-like [Oryza sativa (japonicacultivar-group)]                                                                                                                                                                                                                                                                                                                                                                                                                                                                                                                                  | 145   | 1E-28   |
|                       |                 |                     |                          |                     | >dbj BAD36111.1  putative BRI1-KD interacting protein 118 [Oryza sativa (japonicacultivar-group)]                                                                                                                                                                                                                                                                                                                                                                                                                                                                                                                              | 372   | 1E-28   |

**Table 4. Microarray analysis results, mode of gene action classification, and BLAST annotation for the 1,367 ESTs identified as differentially expressed among genotypes (15% FDR)**

| GenBank accession no. | Overall P value | Significant pattern | Fold change <sup>†</sup> | Sector <sup>‡</sup> | BLAST annotation*                                                                                                                                                                                                                                                                                                                                                                                                                           | Score | E value |
|-----------------------|-----------------|---------------------|--------------------------|---------------------|---------------------------------------------------------------------------------------------------------------------------------------------------------------------------------------------------------------------------------------------------------------------------------------------------------------------------------------------------------------------------------------------------------------------------------------------|-------|---------|
|                       |                 |                     |                          |                     | >ref NP_567893.1  unknown protein [Arabidopsis thaliana]gb AAM44942.1  unknown protein [Arabidopsis thaliana] gb AAK59686.1  unknown protein [Arabidopsis thaliana]                                                                                                                                                                                                                                                                         | 437   | 2E-20   |
| CD568511              | 2.74E-03        | Mo17<B73=F1         | 1.28                     | 10                  | >ref XP_483494.1  nuclear transport factor 2 (NTF-2) [Oryza sativa (japonica cultivar-group)] dbj BAD11649.1  nuclear transport factor 2 (NTF-2) [Oryza sativa (japonica cultivar-group)] sp Q9XJ54 NTF2_ORYSA Nuclear transport factor 2 (NTF-2) dbj BAA81910.1  nuclear transport factor 2 (NTF2) [Oryza sativa (japonica cultivar-group)]                                                                                                | 122   | 6E-42   |
|                       |                 |                     |                          |                     | >gb AAM63803.1  nuclear transport factor 2, putative [Arabidopsis thaliana]                                                                                                                                                                                                                                                                                                                                                                 | 123   | 5E-33   |
|                       |                 |                     |                          |                     | >ref NP_174118.1  protein transporter [Arabidopsis thaliana]gb AAG51491.1  nuclear transport factor 2, putative [Arabidopsis thaliana] sp Q9C7F5 NTF2_ARATH Nuclear transport factor 2 (NTF-2)                                                                                                                                                                                                                                              | 126   | 5E-33   |
|                       |                 |                     |                          |                     | >ref NP_174051.1  protein transporter [Arabidopsis thaliana]gb AAL66888.1  similar to nuclear transport factor 2 [Arabidopsis thaliana] gb AAK68829.1  similar to nuclear transport factor 2 [Arabidopsis thaliana] gb AAF99749.1  F17L21.10 [Arabidopsis thaliana]                                                                                                                                                                         | 122   | 3E-31   |
|                       |                 |                     |                          |                     | >gb AAF16635.1  T23J18.22 [Arabidopsis thaliana]                                                                                                                                                                                                                                                                                                                                                                                            | 522   | 8E-26   |
| CB617229              | 2.74E-03        | B73=Mo17<F1         | 1.3                      | 12                  | >sp P11428 SODC2 MAIZE Superoxide dismutase [Cu-Zn] 2gb AAA33511.1  SOD2 protein gb AAA33510.1  superoxide dismutase 2                                                                                                                                                                                                                                                                                                                      | 151   | 2E-84   |
|                       |                 |                     |                          |                     | >sp P28757 SODC2_ORYSA Superoxide dismutase [Cu-Zn] 2gb AAC14465.1  cytosolic copper/zinc-superoxide dismutase [Oryza sativa] dbj BAA00800.1  copper/zinc-superoxide dismutase [Oryza sativa (japonica cultivar-group)]                                                                                                                                                                                                                     | 152   | 9E-76   |
|                       |                 |                     |                          |                     | >emb CAB57992.1  superoxide dismutase-4AP [Zea mays]sp P23345 SODC4 MAIZE Superoxide dismutase [Cu-Zn] 4A                                                                                                                                                                                                                                                                                                                                   | 152   | 1E-75   |
|                       |                 |                     |                          |                     | >sp P23346 SODC5 MAIZE Superoxide dismutase [Cu-Zn] 4AP                                                                                                                                                                                                                                                                                                                                                                                     | 152   | 2E-75   |
|                       |                 |                     |                          |                     | >emb CAB60191.1  copper/zinc-superoxide dismutase [Ananas comosus]sp Q9SQL5 SODC ANACO Superoxide dismutase [Cu-Zn]                                                                                                                                                                                                                                                                                                                         | 152   | 2E-74   |
| CB833554              | 2.74E-03        | F1=Mo17<B73         | 1.3                      | 8                   | >gb AAK58370.1  T-cytoplasm male sterility restorer factor 2 [Zea mays]                                                                                                                                                                                                                                                                                                                                                                     | 549   | 4E-91   |
|                       |                 |                     |                          |                     | >gb AAG43988.1  T cytoplasm male sterility restorer factor 2 [Zea mays]gb AAC49371.1  RF2                                                                                                                                                                                                                                                                                                                                                   | 549   | 4E-91   |
|                       |                 |                     |                          |                     | >dbj BAB92019.1  mitochondrial aldehyde dehydrogenase [Sorghum bicolor]                                                                                                                                                                                                                                                                                                                                                                     | 547   | 6E-90   |
|                       |                 |                     |                          |                     | >dbj BAB62757.1  mitochondrial aldehyde dehydrogenase ALDH2 [Hordeum vulgare subsp.vulgare]                                                                                                                                                                                                                                                                                                                                                 | 549   | 5E-87   |
|                       |                 |                     |                          |                     | >gb AAF73828.1  aldehyde dehydrogenase [Oryza sativa]                                                                                                                                                                                                                                                                                                                                                                                       | 549   | 5E-87   |
| BM073014              | 2.78E-03        | Mo17<B73=F1         | 1.78                     | 11                  | >sp Q43199 APT1 WHEAT Adenine phosphoribosyltransferase 1 (APRT)gb AAA80609.1  adenine phosphoribosyltransferase form 1                                                                                                                                                                                                                                                                                                                     | 181   | 2E-53   |
|                       |                 |                     |                          |                     | >dbj BAB08003.1  Adenine phosphoribosyltransferase [Hordeum vulgare subsp. vulgare]                                                                                                                                                                                                                                                                                                                                                         | 181   | 2E-53   |
|                       |                 |                     |                          |                     | >gb ABA99757.1  adenine phosphoribosyltransferase, putative [Oryza sativa (japonica cultivar-group)]                                                                                                                                                                                                                                                                                                                                        | 240   | 1E-50   |
|                       |                 |                     |                          |                     | >gb AAP85303.1  adenine phosphoribosyltransferase [Brassica napus]                                                                                                                                                                                                                                                                                                                                                                          | 204   | 4E-48   |
|                       |                 |                     |                          |                     | >gb ABB86271.1  adenine phosphoribosyltransferase-like [Solanum tuberosum]                                                                                                                                                                                                                                                                                                                                                                  | 182   | 4E-47   |
| BM333081              | 2.81E-03        | Mo17<B73=F1         | 1.69                     | 10                  | ns                                                                                                                                                                                                                                                                                                                                                                                                                                          |       |         |
| DV549655              | 2.82E-03        | B73<F1=Mo17         | 1.37                     | 3                   | >dbj BAD73106.1  RNA-binding protein -like [Oryza sativa (japonica cultivar-group)]dbj BAD73038.1  RNA-binding protein -like [Oryza sativa (japonica cultivar-group)]                                                                                                                                                                                                                                                                       | 308   | 2E-8    |
| DV622390              | 2.82E-03        | B73<F1=Mo17         | 1.49                     | 3                   | >dbj BAD81289.1  unknown protein [Oryza sativa (japonica cultivar-group)]                                                                                                                                                                                                                                                                                                                                                                   | 487   | 9E-65   |
|                       |                 |                     |                          |                     | >ref NP_913512.1  unnamed protein product [Oryza sativa (japonica cultivar-group)]                                                                                                                                                                                                                                                                                                                                                          | 210   | 2E-62   |
|                       |                 |                     |                          |                     | >ref NP_188244.2  nucleic acid binding [Arabidopsis thaliana]                                                                                                                                                                                                                                                                                                                                                                               | 449   | 3E-48   |
|                       |                 |                     |                          |                     | >dbj BAB01263.1  unnamed protein product [Arabidopsis thaliana]                                                                                                                                                                                                                                                                                                                                                                             | 419   | 1E-46   |
|                       |                 |                     |                          |                     | >dbj BAD81288.1  unknown protein [Oryza sativa (japonica cultivar-group)]                                                                                                                                                                                                                                                                                                                                                                   | 225   | 1E-43   |
| CD568965              | 2.83E-03        | Mo17<B73=F1         | 1.29                     | 10                  | >ref XP_468402.1  putative NADH dehydrogenase [Oryza sativa (japonica cultivar-group)] dbj BAD22016.1  putative NADH dehydrogenase [Oryza sativa (japonica cultivar-group)] dbj BAD21515.1  putative NADH dehydrogenase [Oryza sativa (japonica cultivar-group)]                                                                                                                                                                            | 408   | 1E-80   |
|                       |                 |                     |                          |                     | >ref NP_565469.1  unknown protein [Arabidopsis thaliana]gb AAT68351.1  hypothetical protein At2g20360 [Arabidopsis thaliana] gb AAK93749.1  putative NADH-ubiquinone oxidoreductase [Arabidopsis thaliana] gb AAK59545.1  putative NADH-ubiquinone oxidoreductase [Arabidopsis thaliana] gb AAD21752.2  putative NADH-ubiquinone oxidoreductase [Arabidopsis thaliana] gb AAK23820.1  hypothetical protein At2g20360 [Arabidopsis thaliana] | 402   | 9E-67   |
|                       |                 |                     |                          |                     | >gb AAL41318.1  NADH-ubiquinone oxidoreductase [Agrobacterium tumefaciens str. C58]ref NP_531002.1  NADH-ubiquinone oxidoreductase [Agrobacterium tumefaciens str. C58]                                                                                                                                                                                                                                                                     | 326   | 6E-18   |
|                       |                 |                     |                          |                     | >gb AAK86111.1  AGR C 511p [Agrobacterium tumefaciens str. C58]ref NP_353326.1  hypothetical protein AGR C 511 [Agrobacterium tumefaciens str. C58]                                                                                                                                                                                                                                                                                         | 354   | 6E-18   |
|                       |                 |                     |                          |                     | >gb EAN07479.1  NADH dehydrogenase (ubiquinone) 1 alpha subcomplex [Mesorhizobium sp. BNC1] ref ZP_00611528.1  NADH dehydrogenase (ubiquinone) 1 alpha subcomplex [Mesorhizobium sp. BNC1]                                                                                                                                                                                                                                                  | 323   | 8E-18   |
| CD484299              | 2.86E-03        | F1=Mo17<B73         | 1.36                     | 9                   | >ref XP_472335.1  OSJNBa0039C07.4 [Oryza sativa (japonica cultivar-group)]emb CAE05148.2  OSJNBa0039C07.4 [Oryza sativa (japonica cultivar-group)]                                                                                                                                                                                                                                                                                          | 888   | 2E-10   |
|                       |                 |                     |                          |                     | >sp P35100 CLPA_PEA ATP-dependent Clp protease ATP-binding subunit clpA homolog.chloroplast precursor gb AAA33680.1  nuclear encoded precursor to chloroplast protein                                                                                                                                                                                                                                                                       | 922   | 9E-10   |
|                       |                 |                     |                          |                     | >gb AAD02267.1  ClpC protease [Spinacia oleracea]                                                                                                                                                                                                                                                                                                                                                                                           | 891   | 3E-9    |
|                       |                 |                     |                          |                     | >gb ABA96309.1  Clp amino terminal domain, putative [Oryza sativa (japonica cultivar-group)]                                                                                                                                                                                                                                                                                                                                                | 1407  | 3E-9    |
|                       |                 |                     |                          |                     | >sp P31542 CLPAB_LYCES ATP-dependent Clp protease ATP-binding subunit clpA homolog CD4B.chloroplast precursor gb AAA34161.1  ATP-dependent protease (CD4B)                                                                                                                                                                                                                                                                                  | 923   | 3E-9    |
| BG840952              | 2.87E-03        | Mo17<B73=F1         | 1.56                     | 10                  | >dbj BAD28236.1  putative ASR2 [Oryza sativa (japonica cultivar-group)]                                                                                                                                                                                                                                                                                                                                                                     | 105   | 3E-7    |

**Table 4. Microarray analysis results, mode of gene action classification, and BLAST annotation for the 1,367 ESTs identified as differentially expressed among genotypes (15% FDR)**

| GenBank accession no. | Overall P value | Significant pattern | Fold change <sup>†</sup> | Sector <sup>‡</sup> | BLAST annotation*                                                                                                                                                                                                                                                                                                                                                                                                | Score | E value |
|-----------------------|-----------------|---------------------|--------------------------|---------------------|------------------------------------------------------------------------------------------------------------------------------------------------------------------------------------------------------------------------------------------------------------------------------------------------------------------------------------------------------------------------------------------------------------------|-------|---------|
|                       |                 |                     |                          |                     | >gb AAD00255.1  similar to Solanum tuberosum ci21A gene product encoded by thesequence presented in GenBank Accession Number U76610                                                                                                                                                                                                                                                                              | 108   | 8E-7    |
|                       |                 |                     |                          |                     | >gb AAD00254.1  cold inducible; similar to other osmotic stress induced geneproducts including: Tomato abscisic stress ripening protein 1 encoded by GenBank Accession Number L08255, Solanum lycopersicum ABA- and ripening-induced protein encoded by GenBank Accession Number L20756 and to Solanum chacoense abscisic stress ripening protein encoded by GenBank Accession Number U12439 [Solanum tuberosum] | 109   | 2E-6    |
|                       |                 |                     |                          |                     | >gb ABB55381.1  fruit-ripening protein-like [Solanum tuberosum]                                                                                                                                                                                                                                                                                                                                                  | 109   | 2E-6    |
|                       |                 |                     |                          |                     | >gb AAP37981.1  ASR2 [Lycopersicon peruvianum var. humifusum]                                                                                                                                                                                                                                                                                                                                                    | 112   | 7E-6    |
| BM078784              | 2.87E-03        | Mo17<B73=F1         | 1.23                     | 10                  | >gb ABA91282.1  expressed protein [Oryza sativa (japonica cultivar-group)]                                                                                                                                                                                                                                                                                                                                       | 312   | 4E-21   |
|                       |                 |                     |                          |                     | >gb ABA95707.1  expressed protein [Oryza sativa (japonica cultivar-group)]                                                                                                                                                                                                                                                                                                                                       | 312   | 4E-21   |
|                       |                 |                     |                          |                     | >gb AAN60225.1  unknown [Arabidopsis thaliana]                                                                                                                                                                                                                                                                                                                                                                   | 321   | 2E-9    |
|                       |                 |                     |                          |                     | >gb AAM67353.1  unknown [Arabidopsis thaliana]                                                                                                                                                                                                                                                                                                                                                                   | 203   | 2E-9    |
|                       |                 |                     |                          |                     | >ref NP_566456.3  unknown protein [Arabidopsis thaliana] gb AAL15206.1  unknown protein [Arabidopsis thaliana]  gb AAK59532.1  unknown protein [Arabidopsis thaliana]  gb AAP06824.1  unknown protein [Arabidopsis thaliana]                                                                                                                                                                                     | 321   | 3E-9    |
| DV489988              | 2.87E-03        | B73<F1=Mo17         | 2.26                     | 2                   | >gb AAL99610.1  cytosolic aldehyde dehydrogenase RF2D [Zea mays]                                                                                                                                                                                                                                                                                                                                                 | 466   | 2E-49   |
|                       |                 |                     |                          |                     | >gb AAL99611.1  cytosolic aldehyde dehydrogenase RF2D [Zea mays]                                                                                                                                                                                                                                                                                                                                                 | 511   | 2E-49   |
|                       |                 |                     |                          |                     | >ref NP_917473.1  putative cytosolic aldehyde dehydrogenase [Oryza sativa (japonica cultivar-group)]  dbj BAB55808.1  putative cytosolic aldehyde dehydrogenase RF2D [Oryza sativa (japonica cultivar-group)]                                                                                                                                                                                                    | 507   | 4E-45   |
|                       |                 |                     |                          |                     | >emb CAD70189.1  aldehyde dehydrogenase [Bixa orellana]                                                                                                                                                                                                                                                                                                                                                          | 504   | 1E-39   |
|                       |                 |                     |                          |                     | >gb AAL99608.1  cytosolic aldehyde dehydrogenase RF2C [Zea mays]                                                                                                                                                                                                                                                                                                                                                 | 502   | 2E-38   |
| BM336709              | 2.89E-03        | F1=Mo17<B73         | 1.44                     | 9                   | >gb AAG34825.1  glutathione S-transferase GST 17 [Zea mays]                                                                                                                                                                                                                                                                                                                                                      | 213   | 4E-96   |
|                       |                 |                     |                          |                     | >ref XP_466275.1  putative glutathione s-transferase [Oryza sativa (japonica cultivar-group)]  dbj BAD15813.1  putative glutathione s-transferase [Oryza sativa (japonica cultivar-group)]  dbj BAD15586.1  putative glutathione s-transferase [Oryza sativa (japonica cultivar-group)]                                                                                                                          | 237   | 6E-75   |
|                       |                 |                     |                          |                     | >gb AAS83978.1  glutathione S-transferase [Oryza sativa (japonica cultivar-group)]                                                                                                                                                                                                                                                                                                                               | 241   | 2E-74   |
|                       |                 |                     |                          |                     | >gb AAX95838.1  hypothetical protein [Oryza sativa (japonica cultivar-group)] gb AAX92930.1  maleylacetoacetate isomerase [Oryza sativa (japonica cultivar-group)]  gb ABA92395.1  maleylacetoacetate isomerase [Oryza sativa (japonica cultivar-group)]                                                                                                                                                         | 240   | 2E-58   |
|                       |                 |                     |                          |                     | >emb CAD31225.1  glutathione s-transferase [Oryza sativa (japonica cultivar-group)]                                                                                                                                                                                                                                                                                                                              | 185   | 1E-56   |
| DV551313              | 2.90E-03        | B73<F1=Mo17         | 1.37                     | 2                   | >dbj BAD82281.1  putative microtubule bundling polypeptide TMBP200 [Oryza sativa(japonica cultivar-group)]  dbj BAD82707.1  putative microtubule bundling polypeptide TMBP200 [Oryza sativa (japonica cultivar-group)]                                                                                                                                                                                           | 1997  | 3E-32   |
|                       |                 |                     |                          |                     | >dbj BAB88648.1  microtubule bundling polypeptide TMBP200 [Nicotiana tabacum]                                                                                                                                                                                                                                                                                                                                    | 2029  | 2E-28   |
|                       |                 |                     |                          |                     | >dbj BAD93861.1  similar to ch-TOG protein from Homo sapiens [Arabidopsis thaliana]                                                                                                                                                                                                                                                                                                                              | 434   | 2E-27   |
|                       |                 |                     |                          |                     | >gb AAD15450.2  similar to ch-TOG protein from Homo sapiens [Arabidopsis thaliana]                                                                                                                                                                                                                                                                                                                               | 1611  | 2E-27   |
|                       |                 |                     |                          |                     | >ref NP_565811.2  MOR1 (MICROTUBULE ORGANIZATION 1) [Arabidopsis thaliana] gb AAM94170.1  MOR1/GEM1 [Arabidopsis thaliana]  gb AAK59871.1  microtubule organization 1 protein [Arabidopsis thaliana]                                                                                                                                                                                                             | 1978  | 2E-27   |
| CB251987              | 2.91E-03        | Mo17<B73=F1         | 1.33                     | 10                  | >dbj BAD46697.1  putative hASNA-I [Oryza sativa (japonica cultivar-group)]                                                                                                                                                                                                                                                                                                                                       | 361   | 3E-11   |
|                       |                 |                     |                          |                     | >dbj BAD94314.1  arsA homolog (hASNA-I) [Arabidopsis thaliana]                                                                                                                                                                                                                                                                                                                                                   | 71    | 7E-6    |
| BM337350              | 2.93E-03        | Mo17<B73=F1         | 5.06                     | 10                  | ns                                                                                                                                                                                                                                                                                                                                                                                                               |       |         |
| CD001277              | 2.93E-03        | B73<F1=Mo17         | 1.18                     | 3                   | >ref NP_187148.2  metal ion binding [Arabidopsis thaliana]                                                                                                                                                                                                                                                                                                                                                       | 397   | 9E-19   |
| CB350721              | 2.94E-03        | B73<F1=Mo17         | 1.49                     | 3                   | >emb CAD41688.1  OSJNBb0015D13.13 [Oryza sativa (japonica cultivar-group)]                                                                                                                                                                                                                                                                                                                                       | 319   | 2E-62   |
|                       |                 |                     |                          |                     | >gb AAZ08319.1  putative xyloglucan endotransglycosylase/hydrolase [Eucalyptusglobulus]                                                                                                                                                                                                                                                                                                                          | 158   | 9E-39   |
|                       |                 |                     |                          |                     | >gb AAS77347.1  sadtomato protein [Capsicum annuum]                                                                                                                                                                                                                                                                                                                                                              | 201   | 2E-38   |
|                       |                 |                     |                          |                     | >gb AAZ08349.1  xyloglucan endotransglycosylase/hydrolase 16 protein [Lycopersiconesculentum]                                                                                                                                                                                                                                                                                                                    | 266   | 1E-36   |
|                       |                 |                     |                          |                     | >gb AAV92081.1  xyloglucan endotransglycosylase/hydrolase [Brassica rapa]                                                                                                                                                                                                                                                                                                                                        | 281   | 3E-33   |
| DV490053              | 2.95E-03        | Mo17<B73=F1         | 2.32                     | 10                  | >gb AAP80670.1  early nodule-specific-like protein ENOD8 gene [Triticum aestivum]                                                                                                                                                                                                                                                                                                                                | 166   | 6E-61   |
|                       |                 |                     |                          |                     | >ref XP_550346.1  putative early nodule-specific-like protein ENOD8 [Oryza sativa(japonica cultivar-group)]  dbj BAD67642.1  putative early nodule-specific-like protein ENOD8 [Oryza sativa (japonica cultivar-group)]                                                                                                                                                                                          | 227   | 8E-61   |
|                       |                 |                     |                          |                     | >ref NP_194612.2  S-adenosylmethionine-dependent methyltransferase [Arabidopsisthaliana]  gb AAO64787.1  At4g28830 [Arabidopsis thaliana]                                                                                                                                                                                                                                                                        | 208   | 5E-51   |
|                       |                 |                     |                          |                     | >emb CAB81471.1  putative protein [Arabidopsis thaliana] emb CAA22969.1  putative protein [Arabidopsis thaliana]                                                                                                                                                                                                                                                                                                 | 138   | 1E-35   |
|                       |                 |                     |                          |                     | >gb EAA06478.2  ENSANGP00000019387 [Anopheles gambiae str. PEST] ref XP_310965.2  ENSANGP00000019387 [Anopheles gambiae str. PEST]                                                                                                                                                                                                                                                                               | 215   | 1E-28   |
| AW067012              | 2.98E-03        | B73<F1=Mo17         | 8.34                     | 3                   | ns                                                                                                                                                                                                                                                                                                                                                                                                               |       |         |
| CD568618              | 2.99E-03        | B73<F1=Mo17         | 1.34                     | 3                   | >gb AAU43984.1  unknown protein [Oryza sativa (japonica cultivar-group)]                                                                                                                                                                                                                                                                                                                                         | 613   | 4E-79   |
|                       |                 |                     |                          |                     | >dbj BAD82224.1  putative SEC14 protein [Oryza sativa (japonica cultivar-group)] dbj BAD81782.1  putative SEC14 protein [Oryza sativa (japonica cultivar-group)]                                                                                                                                                                                                                                                 | 671   | 1E-58   |
|                       |                 |                     |                          |                     | >ref NP_917103.1  putative SEC14 - like protein [Oryza sativa (japonica cultivar-group)]                                                                                                                                                                                                                                                                                                                         | 492   | 2E-58   |

**Table 4. Microarray analysis results, mode of gene action classification, and BLAST annotation for the 1,367 ESTs identified as differentially expressed among genotypes (15% FDR)**

| GenBank accession no. | Overall P value | Significant pattern | Fold change <sup>†</sup> | Sector <sup>‡</sup> | BLAST annotation*                                                                                                                                                                                                                                                                                                                                                                                                                                                                     | Score | E value |
|-----------------------|-----------------|---------------------|--------------------------|---------------------|---------------------------------------------------------------------------------------------------------------------------------------------------------------------------------------------------------------------------------------------------------------------------------------------------------------------------------------------------------------------------------------------------------------------------------------------------------------------------------------|-------|---------|
|                       |                 |                     |                          |                     | >emb CAB80580.1  SEC14-like protein [Arabidopsis thaliana]emb CAB43632.1  SEC14-like protein [Arabidopsis thaliana]                                                                                                                                                                                                                                                                                                                                                                   | 617   | 1E-56   |
|                       |                 |                     |                          |                     | >gb AAM91428.1  AT4g39170/T22F8_70 [Arabidopsis thaliana]gb AAK59767.1  AT4g39170/T22F8_70 [Arabidopsis thaliana]                                                                                                                                                                                                                                                                                                                                                                     | 583   | 1E-56   |
| CB381307              | 3.02E-03        | B73=Mo17<F1         | 1.34                     | 12                  | >ref XP_468112.1  putative 20 kDa chaperonin, chloroplast [Oryza sativa (japonica cultivar-group)] dbj BAD19442.1  putative 20 kDa chaperonin, chloroplast [Oryza sativa (japonica cultivar-group)]                                                                                                                                                                                                                                                                                   | 195   | 7E-47   |
|                       |                 |                     |                          |                     | >ref XP_468113.1  putative 20 kDa chaperonin, chloroplast [Oryza sativa (japonica cultivar-group)] ref XP_507011.1  PREDICTED OJ1369_G08.10-2 gene product [Oryza sativa (japonica cultivar-group)] dbj BAD19441.1  putative 20 kDa chaperonin, chloroplast [Oryza sativa (japonica cultivar-group)]                                                                                                                                                                                  | 255   | 7E-47   |
|                       |                 |                     |                          |                     | >dbj BAD36628.1  putative chaperonin 21 precursor [Oryza sativa (japonica cultivar-group)] dbj BAD35232.1  putative chaperonin 21 precursor [Oryza sativa (japonica cultivar-group)]                                                                                                                                                                                                                                                                                                  | 216   | 3E-46   |
|                       |                 |                     |                          |                     | >dbj BAD35228.1  putative chaperonin 21 precursor [Oryza sativa (japonica cultivar-group)]                                                                                                                                                                                                                                                                                                                                                                                            | 252   | 3E-46   |
|                       |                 |                     |                          |                     | >gb AAT80889.1  chloroplast chaperonin 21 [Vitis vinifera]                                                                                                                                                                                                                                                                                                                                                                                                                            | 125   | 6E-43   |
| DV490284              | 3.04E-03        | B73<F1=Mo17         | 1.55                     | 3                   | >ref XP_473572.1  OSJNBa0019K04.6 [Oryza sativa (japonica cultivar-group)]emb CAD41659.3  OSJNBa0019K04.6 [Oryza sativa (japonica cultivar-group)]                                                                                                                                                                                                                                                                                                                                    | 725   | 6E-46   |
|                       |                 |                     |                          |                     | >dbj BAD29367.1  SPX (SYG1/Pho81/XPR1) domain-containing protein-like [Oryza sativa (japonica cultivar-group)] dbj BAD29241.1  SPX (SYG1/Pho81/XPR1) domain-containing protein-like [Oryza sativa (japonica cultivar-group)]                                                                                                                                                                                                                                                          | 697   | 7E-42   |
|                       |                 |                     |                          |                     | >ref NP_192918.1  unknown protein [Arabidopsis thaliana]emb CAB78224.1  putative protein [Arabidopsis thaliana] emb CAB44319.1  putative protein [Arabidopsis thaliana]                                                                                                                                                                                                                                                                                                               | 707   | 4E-38   |
|                       |                 |                     |                          |                     | >gb AAL08230.1  AT4g22990/F7H19_170 [Arabidopsis thaliana]                                                                                                                                                                                                                                                                                                                                                                                                                            | 699   | 3E-37   |
|                       |                 |                     |                          |                     | >ref NP_567674.1  unknown protein [Arabidopsis thaliana]                                                                                                                                                                                                                                                                                                                                                                                                                              | 699   | 3E-37   |
| DV551091              | 3.05E-03        | B73<F1=Mo17         | 2.24                     | 3                   | >gb AAN78327.1  ATP-dependent Clp protease ATP-binding subunit precursor [Oryza sativa (japonica cultivar-group)]                                                                                                                                                                                                                                                                                                                                                                     | 938   | 2E-82   |
|                       |                 |                     |                          |                     | >ref XP_466044.1  ATP-dependent Clp protease ATP-binding subunit precursor [Oryza sativa (japonica cultivar-group)] dbj BAD25404.1  ATP-dependent Clp protease ATP-binding subunit precursor [Oryza sativa (japonica cultivar-group)]                                                                                                                                                                                                                                                 | 938   | 5E-81   |
|                       |                 |                     |                          |                     | >ref XP_472386.1  OJ000315_02.14 [Oryza sativa (japonica cultivar-group)]emb CAE05369.1  OJ000315_02.14 [Oryza sativa (japonica cultivar-group)]                                                                                                                                                                                                                                                                                                                                      | 877   | 5E-66   |
|                       |                 |                     |                          |                     | >ref NP_568750.1  ERD1 (EARLY RESPONSIVE TO DEHYDRATION 1); ATP binding / ATPase/nucleoside-triphosphatase/ nucleotide binding / protein binding [Arabidopsis thaliana] gb AAM91802.1  putative ATP-dependent Clp protease ATP-binding subunit ClpD, ERD1 protein precursor [Arabidopsis thaliana]                                                                                                                                                                                    | 945   | 2E-49   |
|                       |                 |                     |                          |                     | gb AAK59617.1  putative ATP-dependent Clp protease ATP-binding subunit ClpD, ERD1 protein precursor [Arabidopsis thaliana] dbj BAA04506.1  ERD1 protein [Arabidopsis thaliana] sp P42762 ERD1_ARATH ERD1 protein, chloroplast precursor                                                                                                                                                                                                                                               | 822   | 1E-39   |
|                       |                 |                     |                          |                     | >ref ZP_00110397.1  COG0542: ATPases with chaperone activity, ATP-binding subunit [Nostoc punctiforme PCC 73102]                                                                                                                                                                                                                                                                                                                                                                      | 148   | 2E-20   |
| CB329503              | 3.07E-03        | Mo17<B73=F1         | 1.36                     | 10                  | >ref XP_474269.1  OSJNBa0043A12.6 [Oryza sativa (japonica cultivar-group)]emb CAE02801.1  OSJNBa0043A12.6 [Oryza sativa (japonica cultivar-group)]                                                                                                                                                                                                                                                                                                                                    | 147   | 2E-20   |
|                       |                 |                     |                          |                     | >gb AAM08126.1  elicitor and UV light related transcription factor [Oryza sativa]                                                                                                                                                                                                                                                                                                                                                                                                     | 147   | 2E-20   |
|                       |                 |                     |                          |                     | >gb AAU82109.1  ubiquitin-conjugating enzyme [Triticum aestivum]                                                                                                                                                                                                                                                                                                                                                                                                                      | 148   | 1E-19   |
|                       |                 |                     |                          |                     | >dbj BAB89354.1  ubiquitin-conjugating enzyme OsUBC5a [Oryza sativa (japonica cultivar-group)]                                                                                                                                                                                                                                                                                                                                                                                        | 147   | 2E-19   |
|                       |                 |                     |                          |                     | >ref NP_915993.1  ubiquitin conjugating enzyme [Oryza sativa (japonica cultivar-group)] ref NP_915996.1  ubiquitin conjugating enzyme [Oryza sativa (japonica cultivar-group)] dbj BAB93374.1  ubiquitin conjugating enzyme [Oryza sativa (japonica cultivar-group)] dbj BAB93371.1  ubiquitin conjugating enzyme [Oryza sativa (japonica cultivar-group)]                                                                                                                            | 148   | 4E-19   |
| DV490204              | 3.07E-03        | B73<F1=Mo17         | 1.5                      | 2                   | >dbj BAD33496.1  26S proteasome regulatory subunit-like protein [Oryza sativa (japonica cultivar-group)]                                                                                                                                                                                                                                                                                                                                                                              | 213   | 2E-39   |
|                       |                 |                     |                          |                     | >ref NP_568872.1  protein binding [Arabidopsis thaliana]gb AAM65312.1  26S proteasome regulatory subunit p27, putative [Arabidopsis thaliana] gb AAO63310.1  At5g57950 [Arabidopsis thaliana] dbj BAC43064.1  unknown protein [Arabidopsis thaliana]                                                                                                                                                                                                                                  | 227   | 8E-26   |
|                       |                 |                     |                          |                     | >dbj BAB08865.1  unnamed protein product [Arabidopsis thaliana]                                                                                                                                                                                                                                                                                                                                                                                                                       | 275   | 1E-20   |
|                       |                 |                     |                          |                     | >emb CAG08436.1  unnamed protein product [Tetraodon nigroviridis]                                                                                                                                                                                                                                                                                                                                                                                                                     | 212   | 7E-15   |
|                       |                 |                     |                          |                     | >gb AAH41532.1  MGC53232 protein [Xenopus laevis]                                                                                                                                                                                                                                                                                                                                                                                                                                     | 213   | 2E-13   |
| CD661753              | 3.08E-03        | F1=Mo17<B73         | 1.46                     | 9                   | >ref XP_472193.1  OSJNBb0006N15.8 [Oryza sativa (japonica cultivar-group)]emb CAE04591.2  OSJNBb0006N15.8 [Oryza sativa (japonica cultivar-group)]                                                                                                                                                                                                                                                                                                                                    | 123   | 5E-51   |
|                       |                 |                     |                          |                     | >ref XP_507485.1  PREDICTED OJ1126_B06.24 gene product [Oryza sativa (japonica cultivar-group)] ref XP_465859.1  putative 60S ribosomal protein L35 [Oryza sativa (japonica cultivar-group)] ref XP_506809.1  PREDICTED OJ1126_B06.24 gene product [Oryza sativa (japonica cultivar-group)] dbj BAD22912.1  putative 60S ribosomal protein L35 [Oryza sativa (japonica cultivar-group)] dbj BAD23213.1  putative 60S ribosomal protein L35 [Oryza sativa (japonica cultivar-group)]   | 123   | 8E-50   |
|                       |                 |                     |                          |                     | >ref NP_195881.1  structural constituent of ribosome [Arabidopsis thaliana]emb CAB85998.1  ribosomal protein L35-like [Arabidopsis thaliana] gb AAQ22651.1  At5g02610 [Arabidopsis thaliana] sp Q9LZ41 RL354_ARATH 60S ribosomal protein L35-4 pir T48282 ribosomal protein L35-like - Arabidopsis thaliana                                                                                                                                                                           | 123   | 5E-47   |
|                       |                 |                     |                          |                     | >ref NP_181471.1  structural constituent of ribosome [Arabidopsis thaliana]gb AAL34210.1  putative 60S ribosomal protein L35 [Arabidopsis thaliana] gb AAK59609.1  putative 60S ribosomal protein L35 [Arabidopsis thaliana] gb AAC27830.1  60S ribosomal protein L35 [Arabidopsis thaliana] gb AAM61292.1  60S ribosomal protein L35 [Arabidopsis thaliana] pir T00549 60S ribosomal protein L35 [imported] - Arabidopsis thaliana sp O80626 RL352_ARATH 60S ribosomal protein L35-1 | 123   | 6E-46   |
|                       |                 |                     |                          |                     | >ref NP_187561.1  structural constituent of ribosome [Arabidopsis thaliana]gb AAM64363.1  putative 60S ribosomal protein L35 [Arabidopsis thaliana]                                                                                                                                                                                                                                                                                                                                   | 123   | 6E-46   |
|                       |                 |                     |                          |                     | gb AAF23282.1  putative 60S ribosomal protein L35 [Arabidopsis thaliana] gb AAO50471.1  putative 60S ribosomal protein L35 [Arabidopsis thaliana]                                                                                                                                                                                                                                                                                                                                     | 123   | 1E-45   |
|                       |                 |                     |                          |                     | gb AAO42195.1  putative 60S ribosomal protein L35 [Arabidopsis thaliana] sp Q9SF53 RL351_ARATH 60S ribosomal protein L35-2                                                                                                                                                                                                                                                                                                                                                            | 123   | 1E-45   |

**Table 4. Microarray analysis results, mode of gene action classification, and BLAST annotation for the 1,367 ESTs identified as differentially expressed among genotypes (15% FDR)**

| GenBank accession no. | Overall P value | Significant pattern | Fold change <sup>†</sup> | Sector <sup>‡</sup> | BLAST annotation*                                                                                                                                                                                                                                                                                                                                                                                                                                                                                                                                                                                                                                                                                                                                                   | Score | E value |
|-----------------------|-----------------|---------------------|--------------------------|---------------------|---------------------------------------------------------------------------------------------------------------------------------------------------------------------------------------------------------------------------------------------------------------------------------------------------------------------------------------------------------------------------------------------------------------------------------------------------------------------------------------------------------------------------------------------------------------------------------------------------------------------------------------------------------------------------------------------------------------------------------------------------------------------|-------|---------|
| DV495837              | 3.08E-03        | B73<F1=Mo17         | 1.35                     | 3                   | >ref XP_464376.1  receptor protein kinase PERK1-like protein [Oryza sativa (japonica cultivar-group)] ref XP_506736.1  PREDICTED OJ1115_B01.27 gene product [Oryza sativa (japonica cultivar-group)] dbj BAD15446.1  receptor protein kinase PERK1-like protein [Oryza sativa (japonica cultivar-group)] dbj BAD15416.1  receptor protein kinase PERK1-like protein [Oryza sativa (japonica cultivar-group)]                                                                                                                                                                                                                                                                                                                                                        | 377   | 1E-32   |
|                       |                 |                     |                          |                     | >ref XP_550361.1  putative receptor protein kinase PERK1 [Oryza sativa (japonica cultivar-group)] dbj BAD67868.1  putative receptor protein kinase PERK1 [Oryza sativa (japonica cultivar-group)] dbj BAD67605.1  putative receptor protein kinase PERK1 [Oryza sativa (japonica cultivar-group)]                                                                                                                                                                                                                                                                                                                                                                                                                                                                   | 367   | 7E-18   |
|                       |                 |                     |                          |                     | >ref NP_564609.3  ATP binding / kinase/ protein kinase/ protein serine/threoninekinase/ protein-tyrosine kinase [Arabidopsis thaliana] gb AAM63304.1  somatic embryogenesis receptor-like kinase, putative [Arabidopsis thaliana]                                                                                                                                                                                                                                                                                                                                                                                                                                                                                                                                   | 350   | 2E-11   |
|                       |                 |                     |                          |                     | >gb AAD55610.1  Contains PF00069 Eukaryotic protein kinase domain. ESTs gb W43822, gb T20475 and gb AA586152 come from this gene. [Arabidopsis thaliana]                                                                                                                                                                                                                                                                                                                                                                                                                                                                                                                                                                                                            | 347   | 2E-11   |
|                       |                 |                     |                          |                     | >gb AAM65900.1  protein kinase, putative [Arabidopsis thaliana]                                                                                                                                                                                                                                                                                                                                                                                                                                                                                                                                                                                                                                                                                                     | 361   | 7E-10   |
| DV622388              | 3.09E-03        | F1=Mo17<B73         | 1.23                     | 9                   | >dbj BAD53489.1  putative decoy [Oryza sativa (japonica cultivar-group)]                                                                                                                                                                                                                                                                                                                                                                                                                                                                                                                                                                                                                                                                                            | 248   | 8E-49   |
|                       |                 |                     |                          |                     | >ref NP_172914.1  DECOY [Arabidopsis thaliana]gb AAN46785.1  At1g14620/T5E21_15 [Arabidopsis thaliana] gb AAM83228.1  At1g14620/T5E21_15 [Arabidopsis thaliana]                                                                                                                                                                                                                                                                                                                                                                                                                                                                                                                                                                                                     | 233   | 9E-38   |
|                       |                 |                     |                          |                     | >gb AAF63174.1  T5E21.12 [Arabidopsis thaliana]                                                                                                                                                                                                                                                                                                                                                                                                                                                                                                                                                                                                                                                                                                                     | 254   | 1E-34   |
| DV549373              | 3.09E-03        | Mo17<B73=F1         | 2.4                      | 11                  | >gb AAB48039.1  decoy [Arabidopsis thaliana]gb AAB51588.1  decoy [Arabidopsis thaliana]                                                                                                                                                                                                                                                                                                                                                                                                                                                                                                                                                                                                                                                                             | 210   | 5E-22   |
|                       |                 |                     |                          |                     | >ref NP_917838.1  putative chloroplast 50S ribosomal protein L31 [Oryza sativa(japonica cultivar-group)] dbj BAB90423.1  chloroplast 50S ribosomal protein L31-like [Oryza sativa (japonica cultivar-group)] dbj BAB90722.1  chloroplast 50S ribosomal protein L31-like [Oryza sativa (japonica cultivar-group)]                                                                                                                                                                                                                                                                                                                                                                                                                                                    | 135   | 4E-30   |
|                       |                 |                     |                          |                     | >gb AAC77927.1  similar to chloroplast 50S ribosomal protein L31 [Medicago sativa]                                                                                                                                                                                                                                                                                                                                                                                                                                                                                                                                                                                                                                                                                  | 133   | 5E-8    |
|                       |                 |                     |                          |                     | >ref NP_565109.1  EMB2184; structural constituent of ribosome [Arabidopsis thaliana]gb AAL15224.1  putative chloroplast 50S ribosomal protein L31 [Arabidopsis thaliana] gb AAK44041.1  putative chloroplast 50S ribosomal protein L31 [Arabidopsis thaliana] gb AAM65248.1  chloroplast 50S ribosomal protein L31, putative [Arabidopsis thaliana] gb AAG13073.1  Unknown protein [Arabidopsis thaliana]                                                                                                                                                                                                                                                                                                                                                           | 144   | 6E-6    |
|                       |                 |                     |                          |                     | ns                                                                                                                                                                                                                                                                                                                                                                                                                                                                                                                                                                                                                                                                                                                                                                  |       |         |
| CD484257              | 3.11E-03        | Mo17<B73=F1         | 1.44                     | 11                  | >ref NP_921134.1  putative hydrolase [Oryza sativa (japonica cultivar-group)]gb AAM08665.1  Putative hydrolase [Oryza sativa (japonica cultivar-group)]                                                                                                                                                                                                                                                                                                                                                                                                                                                                                                                                                                                                             | 401   | 2E-87   |
|                       |                 |                     |                          |                     | gb AAM08532.1  Putative hydrolase [Oryza sativa] gb AAP53421.1  hydrolase, alpha/beta fold family, putative [Oryza sativa (japonica cultivar-group)]                                                                                                                                                                                                                                                                                                                                                                                                                                                                                                                                                                                                                | 333   | 2E-50   |
|                       |                 |                     |                          |                     | >ref XP_470785.1  putative hydrolase [Oryza sativa (japonica cultivar-group)]gb AAR06364.1  putative hydrolase [Oryza sativa (japonica cultivar-group)]                                                                                                                                                                                                                                                                                                                                                                                                                                                                                                                                                                                                             | 327   | 5E-47   |
|                       |                 |                     |                          |                     | >ref XP_479188.1  hydrolase-like protein [Oryza sativa (japonica cultivar-group)]dbj BAC79905.1  hydrolase-like protein [Oryza sativa (japonica cultivar-group)]                                                                                                                                                                                                                                                                                                                                                                                                                                                                                                                                                                                                    | 311   | 2E-41   |
|                       |                 |                     |                          |                     | >gb AA78820.1  hydrolase [Arabidopsis thaliana]                                                                                                                                                                                                                                                                                                                                                                                                                                                                                                                                                                                                                                                                                                                     | 328   | 5E-36   |
| DV489819              | 3.12E-03        | B73=F1<Mo17         | 1.69                     | 5                   | >dbj BAD88223.1  putative MtN3 [Oryza sativa (japonica cultivar-group)]                                                                                                                                                                                                                                                                                                                                                                                                                                                                                                                                                                                                                                                                                             | 243   | 2E-19   |
|                       |                 |                     |                          |                     | >ref NP_566493.1  unknown protein [Arabidopsis thaliana]gb AAL47411.1  AT3g14770/T21E2_2 [Arabidopsis thaliana] gb AAL06889.1  AT3g14770/T21E2_2 [Arabidopsis thaliana] dbj BAB02642.1  MtN3-like protein [Arabidopsis thaliana]                                                                                                                                                                                                                                                                                                                                                                                                                                                                                                                                    | 236   | 2E-13   |
|                       |                 |                     |                          |                     | >dbj BAD82209.1  MtN3-like [Oryza sativa (japonica cultivar-group)]dbj BAD81867.1  MtN3-like [Oryza sativa (japonica cultivar-group)]                                                                                                                                                                                                                                                                                                                                                                                                                                                                                                                                                                                                                               | 230   | 6E-10   |
|                       |                 |                     |                          |                     | >gb AAV25007.1  unknow protein [Oryza sativa (japonica cultivar-group)]                                                                                                                                                                                                                                                                                                                                                                                                                                                                                                                                                                                                                                                                                             | 261   | 3E-8    |
|                       |                 |                     |                          |                     | >ref NP_915057.1  P0018C10.36 [Oryza sativa (japonica cultivar-group)]dbj BAC06235.1  putative MtN3 [Oryza sativa (japonica cultivar-group)] dbj BAB90353.1  putative MtN3 [Oryza sativa (japonica cultivar-group)]                                                                                                                                                                                                                                                                                                                                                                                                                                                                                                                                                 | 273   | 3E-8    |
| CB280807              | 3.12E-03        | B73=Mo17<F1         | 1.25                     | 12                  | >gb AAB82138.1  proteasome component [Oryza sativa]                                                                                                                                                                                                                                                                                                                                                                                                                                                                                                                                                                                                                                                                                                                 | 261   | 2E-18   |
|                       |                 |                     |                          |                     | >gb AAT7881.1  proteasome subunit alpha type 2 [Oryza sativa (japonica cultivar-group)] sp Q9LSU2 PSA2_ORYSA Proteasome subunit alpha type 2 (20S proteasome alpha subunit B) (20S proteasome subunit alpha-2) dbj BAA96830.1  alpha 2 subunit of 20S proteasome [Oryza sativa (japonica cultivar-group)]                                                                                                                                                                                                                                                                                                                                                                                                                                                           | 235   | 7E-17   |
|                       |                 |                     |                          |                     | >ref XP_507513.1  PREDICTED OJ1626_B09.4 gene product [Oryza sativa (japonica cultivar-group)] ref XP_466922.1  alpha 2 subunit of 20S proteasome [Oryza sativa (japonica cultivar-group)] ref XP_507512.1  PREDICTED OJ1626_B09.4 gene product [Oryza sativa (japonica cultivar-group)] ref XP_506877.1  PREDICTED OJ1626_B09.4 gene product [Oryza sativa (japonica cultivar-group)] dbj BAD25097.1  alpha 2 subunit of 20S proteasome [Oryza sativa (japonica cultivar-group)]                                                                                                                                                                                                                                                                                   | 235   | 2E-16   |
|                       |                 |                     |                          |                     | >ref NP_001031057.1  PAB1; endopeptidase/ peptidase/ threonine endopeptidase [Arabidopsis thaliana] ref NP_173096.1  PAB1; endopeptidase/ peptidase/ threonine endopeptidase [Arabidopsis thaliana] emb CAA73619.1  multicatalytic endopeptidase [Arabidopsis thaliana] gb AAG48830.1  putative multicatalytic endopeptidase [Arabidopsis thaliana] gb AAM66950.1  multicatalytic endopeptidase [Arabidopsis thaliana] gb AAD34699.1  Identical to gb Y13176 Arabidopsis thaliana mRNA for proteasome subunit prc3. ESTs gb H36972, gb T22551 and gb T13800 come from this gene sp O23708 PSA2A_ARATH Proteasome subunit alpha type 2-A (20S proteasome alpha subunit B) (Proteasome component 3) gb AAC32056.1  20S proteasome subunit PAB1 [Arabidopsis thaliana] | 235   | 1E-12   |
|                       |                 |                     |                          |                     | >gb AAN18089.1  At1g16470/F309_27 [Arabidopsis thaliana]gb AAK95291.1  At1g16470/F309_27 [Arabidopsis thaliana]                                                                                                                                                                                                                                                                                                                                                                                                                                                                                                                                                                                                                                                     | 99    | 1E-12   |
| BM348046              | 3.14E-03        | Mo17<B73=F1         | 1.36                     | 10                  | >ref NP_190556.2  ATARLAI1C; GTP binding [Arabidopsis thaliana]gb AAM48037.1  ADP-ribosylation factor-like protein [Arabidopsis thaliana] gb AAL62421.1  ADP-RIBOSYLATION FACTOR -like protein [Arabidopsis thaliana]                                                                                                                                                                                                                                                                                                                                                                                                                                                                                                                                               | 184   | 9E-24   |
|                       |                 |                     |                          |                     | >ref NP_568553.1  ATARLAI1A; GTP binding [Arabidopsis thaliana]gb AAM47962.1  ADP-ribosylation factor-like protein [Arabidopsis thaliana] gb AAL32736.1  ADP-ribosylation factor-like protein [Arabidopsis thaliana] gb AAM62503.1  ADP-ribosylation factor-like protein [Arabidopsis thaliana]                                                                                                                                                                                                                                                                                                                                                                                                                                                                     | 184   | 1E-23   |
|                       |                 |                     |                          |                     | >ref XP_467635.1  putative ADP-ribosylation factor [Oryza sativa (japonica cultivar-group)] dbj BAD16140.1  putative ADP-ribosylation factor [Oryza sativa (japonica cultivar-group)]                                                                                                                                                                                                                                                                                                                                                                                                                                                                                                                                                                               | 184   | 1E-23   |
|                       |                 |                     |                          |                     |                                                                                                                                                                                                                                                                                                                                                                                                                                                                                                                                                                                                                                                                                                                                                                     |       |         |

**Table 4. Microarray analysis results, mode of gene action classification, and BLAST annotation for the 1,367 ESTs identified as differentially expressed among genotypes (15% FDR)**

| GenBank accession no. | Overall P value | Significant pattern | Fold change <sup>†</sup> | Sector <sup>‡</sup> | BLAST annotation*                                                                                                                                                                                                                                                                                                                                                          | Score | E value |
|-----------------------|-----------------|---------------------|--------------------------|---------------------|----------------------------------------------------------------------------------------------------------------------------------------------------------------------------------------------------------------------------------------------------------------------------------------------------------------------------------------------------------------------------|-------|---------|
|                       |                 |                     |                          |                     | >ref NP_569051.1  ATARL1D; GTP binding [Arabidopsis thaliana]gb AAL47331.1  ADP-ribosylation factor-like protein [Arabidopsis thaliana] gb AAK96715.1  ADP-ribosylation factor-like protein [Arabidopsis thaliana] gb AAM65030.1  ADP-ribosylation factor-like protein [Arabidopsis thaliana]                                                                              | 184   | 2E-22   |
|                       |                 |                     |                          |                     | >ref NP_502791.1  Y57G11C.13 [Caenorhabditis elegans]dbj BAD30093.1  novel small G protein indispensable for equal chromosome segregation [Caenorhabditis elegans] emb CAB16514.1  Hypothetical protein Y57G11C.13 [Caenorhabditis elegans]                                                                                                                                | 185   | 1E-18   |
| DV495862              | 3.15E-03        | B73<F1=Mo17         | 1.54                     | 2                   | >gb AAM47577.1  putative mitochondrial carrier protein [Sorghum bicolor]<br>>ref XP_469800.1  putative mitochondrial carrier protein [Oryza sativa (japonica cultivar-group)] gb AAR01670.1  putative mitochondrial carrier protein [Oryza sativa (japonica cultivar-group)] gb AAG45489.1  3615.1 [Oryza sativa (japonica cultivar-group)]                                | 323   | 1E-18   |
|                       |                 |                     |                          |                     | >gb AAG48999.1  putative mitochondrial carrier protein [Hordeum vulgare subsp.vulgare]                                                                                                                                                                                                                                                                                     | 321   | 3E-18   |
|                       |                 |                     |                          |                     | >gb AAL74183.1  putative mitochondrial carrier protein [Triticum monococcum]                                                                                                                                                                                                                                                                                               | 322   | 2E-17   |
|                       |                 |                     |                          |                     | >emb CAC01763.1  putative mitochondrial carrier protein [Arabidopsis thaliana]                                                                                                                                                                                                                                                                                             | 353   | 2E-13   |
| BG840791              | 3.15E-03        | B73<F1=Mo17         | 1.53                     | 3                   | >dbj BAD82103.1  putative helix-loop-helix protein 1A [Oryza sativa (japonica cultivar-group)]                                                                                                                                                                                                                                                                             | 387   | 5E-20   |
|                       |                 |                     |                          |                     | >ref NP_915198.1  P0035F12.11 [Oryza sativa (japonica cultivar-group)]dbj BAB90521.1  B1065G12.3 [Oryza sativa (japonica cultivar-group)]                                                                                                                                                                                                                                  | 234   | 5E-20   |
|                       |                 |                     |                          |                     | >ref NP_563749.1  DNA binding / transcription factor [Arabidopsis thaliana]gb AAN41354.1  unknown protein [Arabidopsis thaliana]                                                                                                                                                                                                                                           | 362   | 9E-14   |
|                       |                 |                     |                          |                     | >gb AAM63313.1  Contains similarity to bHLH transcription factor GBOF-1 from Tulipagesneriana gb AF185269 [Arabidopsis thaliana]                                                                                                                                                                                                                                           | 362   | 9E-14   |
|                       |                 |                     |                          |                     | >gb AAL87667.1  transcription factor RAU1 [Oryza sativa]                                                                                                                                                                                                                                                                                                                   | 150   | 1E-13   |
| DV622130              | 3.15E-03        | B73<F1=Mo17         | 1.57                     | 2                   | ns                                                                                                                                                                                                                                                                                                                                                                         |       |         |
| DV490784              | 3.18E-03        | B73<F1=Mo17         | 1.29                     | 3                   | >ref XP_479151.1  unknown protein [Oryza sativa (japonica cultivar-group)]dbj BAC80088.1  unknown protein [Oryza sativa (japonica cultivar-group)]                                                                                                                                                                                                                         | 342   | 3E-40   |
|                       |                 |                     |                          |                     | >gb AAU89244.1  von Willebrand factor type A domain containing protein [Oryza sativa(japonica cultivar-group)]                                                                                                                                                                                                                                                             | 801   | 7E-33   |
|                       |                 |                     |                          |                     | >ref NP_173345.2  unknown protein [Arabidopsis thaliana]gb AAN15507.1  unknown protein [Arabidopsis thaliana] gb AAM97055.1  unknown protein [Arabidopsis thaliana]                                                                                                                                                                                                        | 754   | 1E-25   |
|                       |                 |                     |                          |                     | >gb AAF79294.1  F14D16.26 [Arabidopsis thaliana]                                                                                                                                                                                                                                                                                                                           | 736   | 1E-25   |
|                       |                 |                     |                          |                     | >ref NP_177394.1  unknown protein [Arabidopsis thaliana]gb AAG52586.1  hypothetical protein; 14673-17893 [Arabidopsis thaliana]                                                                                                                                                                                                                                            | 758   | 3E-15   |
| CBB16337              | 3.21E-03        | Mo17<B73=F1         | 1.39                     | 10                  | >gb AAO72563.1  elongation factor 1 gamma-like protein [Oryza sativa (japonica cultivar-group)]                                                                                                                                                                                                                                                                            | 413   | 1E-80   |
|                       |                 |                     |                          |                     | >dbj BAD61932.1  putative elongation factor 1 gamma [Oryza sativa (japonica cultivar-group)] dbj BAD61828.1  putative elongation factor 1 gamma [Oryza sativa (japonica cultivar-group)]                                                                                                                                                                                   | 416   | 1E-80   |
|                       |                 |                     |                          |                     | >ref XP_464690.1  Elongation factor 1-gamma [Oryza sativa (japonica cultivar-group)]dbj BAD17615.1  Elongation factor 1-gamma [Oryza sativa (japonica cultivar-group)] sp Q9ZRI7 EF1G ORYSA Elongation factor 1-gamma (EF-1-gamma) (eEF-1B gamma) dbj BAA34206.1  elongation factor 1B gamma [Oryza sativa (japonica cultivar-group)]                                      | 418   | 6E-80   |
|                       |                 |                     |                          |                     | >gb AAO72574.1  elongation factor 1 gamma-like protein [Oryza sativa (japonica cultivar-group)]                                                                                                                                                                                                                                                                            | 409   | 1E-79   |
|                       |                 |                     |                          |                     | >ref XP_464689.1  putative elongation factor 1-gamma [Oryza sativa (japonica cultivar-group)] dbj BAD17614.1  putative elongation factor 1-gamma [Oryza sativa (japonica cultivar-group)]                                                                                                                                                                                  | 414   | 1E-79   |
| DV494743              | 3.22E-03        | B73<F1=Mo17         | 1.25                     | 2                   | >ref XP_478628.1  unknown protein [Oryza sativa (japonica cultivar-group)]dbj BAC83129.1  unknown protein [Oryza sativa (japonica cultivar-group)]                                                                                                                                                                                                                         | 204   | 3E-38   |
|                       |                 |                     |                          |                     | >ref NP_194874.1  structural constituent of ribosome [Arabidopsis thaliana]emb CAB79864.1  putative protein [Arabidopsis thaliana] emb CAB45905.1  putative protein [Arabidopsis thaliana] gb AAL06510.1  AT4g31460/F3L17_30 [Arabidopsis thaliana] gb AAP21159.1  At4g31460/F3L17_30 [Arabidopsis thaliana] gb AAM65340.1  unknown [Arabidopsis thaliana]                 | 212   | 6E-26   |
|                       |                 |                     |                          |                     | >ref XP_473045.1  OSJNBa0067K08.22 [Oryza sativa (japonica cultivar-group)]emb CAD41243.2  OSJNBa0067K08.22 [Oryza sativa (japonica cultivar-group)] dbj BAB12275.1  cytochrome c oxidase subunit 6b [Oryza sativa (japonica cultivar-group)] dbj BAB12339.1  cytochrome c oxidase subunit 6b [Oryza sativa (japonica cultivar-group)]                                     | 77    | 3E-36   |
| BM341324              | 3.23E-03        | Mo17<B73=F1         | 1.39                     | 10                  | >ref XP_470804.1  cytochrome c oxidase subunit 6b-1 [Oryza sativa (japonica cultivar-group)] gb AAR06368.1  cytochrome c oxidase subunit 6b-1 [Oryza sativa (japonica cultivar-group)] dbj BAB12338.1  cytochrome c oxidase subunit 6b [Oryza sativa (japonica cultivar-group)] dbj BAA76393.1  cytochrome c oxidase subunit 6b-1 [Oryza sativa (japonica cultivar-group)] | 169   | 1E-35   |
|                       |                 |                     |                          |                     | >gb AAM92706.1  putative cytochrome c oxidase subunit [Triticum aestivum]                                                                                                                                                                                                                                                                                                  | 157   | 1E-34   |
|                       |                 |                     |                          |                     | >ref NP_568867.1  cytochrome-c oxidase [Arabidopsis thaliana]gb AAM47369.1  AT4g28060/T13J8_170 [Arabidopsis thaliana] gb AAL06549.1  AT4g28060/T13J8_170 [Arabidopsis thaliana] dbj BAC42309.1  unknown protein [Arabidopsis thaliana]                                                                                                                                    | 78    | 2E-34   |
|                       |                 |                     |                          |                     | >gb AAM63485.1  cytochrome c oxidase subunit, putative [Arabidopsis thaliana]                                                                                                                                                                                                                                                                                              | 191   | 2E-34   |
| CBB31687              | 3.24E-03        | Mo17<B73=F1         | 1.36                     | 10                  | ns                                                                                                                                                                                                                                                                                                                                                                         |       |         |
|                       |                 |                     |                          |                     | >ref XP_476668.1  putative glycine-rich protein [Oryza sativa (japonica cultivar-group)] dbj BAC84718.1  putative glycine-rich protein [Oryza sativa (japonica cultivar-group)]                                                                                                                                                                                            | 280   | 1E-10   |
| DV493876              | 3.30E-03        | B73<F1=Mo17         | 1.37                     | 2                   |                                                                                                                                                                                                                                                                                                                                                                            |       |         |
| DV492863              | 3.31E-03        | B73<F1=Mo17         | 1.49                     | 3                   | >gb AAL33650.1  HMG-like nucleosome/chromatin assembly factor D [Zea mays]                                                                                                                                                                                                                                                                                                 | 126   | 2E-46   |
|                       |                 |                     |                          |                     | >gb AAM93217.1  nucleosome/chromatin assembly factor D protein NFD101 [Zea mays]emb CAA70045.1  HMGd1 [Zea mays]                                                                                                                                                                                                                                                           | 126   | 5E-46   |
|                       |                 |                     |                          |                     | >dbj BAD33893.1  putative HMGd1 [Oryza sativa (japonica cultivar-group)]                                                                                                                                                                                                                                                                                                   | 127   | 1E-41   |
|                       |                 |                     |                          |                     | >gb AAB61215.1  DNA-binding protein [Nicotiana tabacum]                                                                                                                                                                                                                                                                                                                    | 142   | 3E-32   |
|                       |                 |                     |                          |                     | >gb AAC50019.1  high mobility group protein 2 HMG2 [Ipomoea nil]                                                                                                                                                                                                                                                                                                           | 146   | 6E-31   |



**Table 4. Microarray analysis results, mode of gene action classification, and BLAST annotation for the 1,367 ESTs identified as differentially expressed among genotypes (15% FDR)**

| GenBank accession no.                                                                                                                                                                                                                                                                                                                                                                                  | Overall P value | Significant pattern | Fold change <sup>†</sup> | Sector <sup>‡</sup> | BLAST annotation*                                                                                                                                                                                                                                                                                                                                                                                                                                                                                                                                                                                                                                                                                                                                                                                                                                                                                                                                                                                                                                                                            | Score | E value |
|--------------------------------------------------------------------------------------------------------------------------------------------------------------------------------------------------------------------------------------------------------------------------------------------------------------------------------------------------------------------------------------------------------|-----------------|---------------------|--------------------------|---------------------|----------------------------------------------------------------------------------------------------------------------------------------------------------------------------------------------------------------------------------------------------------------------------------------------------------------------------------------------------------------------------------------------------------------------------------------------------------------------------------------------------------------------------------------------------------------------------------------------------------------------------------------------------------------------------------------------------------------------------------------------------------------------------------------------------------------------------------------------------------------------------------------------------------------------------------------------------------------------------------------------------------------------------------------------------------------------------------------------|-------|---------|
| CB605341                                                                                                                                                                                                                                                                                                                                                                                               | 3.33E-03        | Mo17<B73=F1         | 1.31                     | 10                  | >ref XP_468756.1  putative ribosomal protein S19 [Oryza sativa (japonica cultivar-group)] ref XP_468752.1  putative ribosomal protein S19 [Oryza sativa (japonica cultivar-group)] gb AAP20855.1  putative ribosomal protein S19 [Oryza sativa (japonica cultivar-group)] gb AAP20842.1  putative ribosomal protein S19 [Oryza sativa (japonica cultivar-group)] sp P40978 RS19 ORYSA 40S ribosomal protein S19                                                                                                                                                                                                                                                                                                                                                                                                                                                                                                                                                                                                                                                                              | 146   | 1E-74   |
|                                                                                                                                                                                                                                                                                                                                                                                                        |                 |                     |                          |                     | >gb AAW34237.1  putative ribosomal protein S19 [Oryza sativa (japonica cultivar-group)]                                                                                                                                                                                                                                                                                                                                                                                                                                                                                                                                                                                                                                                                                                                                                                                                                                                                                                                                                                                                      | 144   | 7E-72   |
|                                                                                                                                                                                                                                                                                                                                                                                                        |                 |                     |                          |                     | >gb AAW34236.1  putative ribosomal protein S19 [Oryza sativa (japonica cultivar-group)]                                                                                                                                                                                                                                                                                                                                                                                                                                                                                                                                                                                                                                                                                                                                                                                                                                                                                                                                                                                                      | 166   | 4E-71   |
|                                                                                                                                                                                                                                                                                                                                                                                                        |                 |                     |                          |                     | >gb AAW34240.1  putative ribosomal protein S19 [Oryza sativa (japonica cultivar-group)]                                                                                                                                                                                                                                                                                                                                                                                                                                                                                                                                                                                                                                                                                                                                                                                                                                                                                                                                                                                                      | 122   | 2E-64   |
|                                                                                                                                                                                                                                                                                                                                                                                                        |                 |                     |                          |                     | >gb ABB87116.1  40S ribosomal protein S19-like [Solanum tuberosum]                                                                                                                                                                                                                                                                                                                                                                                                                                                                                                                                                                                                                                                                                                                                                                                                                                                                                                                                                                                                                           | 143   | 3E-61   |
| BG841557                                                                                                                                                                                                                                                                                                                                                                                               | 3.34E-03        | Mo17<B73=F1         | 1.5                      | 10                  | >gb ABB47793.1  pol polyprotein, putative [Oryza sativa (japonica cultivar-group)]                                                                                                                                                                                                                                                                                                                                                                                                                                                                                                                                                                                                                                                                                                                                                                                                                                                                                                                                                                                                           | 116   | 5E-53   |
|                                                                                                                                                                                                                                                                                                                                                                                                        |                 |                     |                          |                     | >ref NP_922007.1  putative pol polyprotein [Oryza sativa (japonica cultivar-group)]gb AAG13579.1  putative pol polyprotein [Oryza sativa]                                                                                                                                                                                                                                                                                                                                                                                                                                                                                                                                                                                                                                                                                                                                                                                                                                                                                                                                                    | 105   | 3E-47   |
|                                                                                                                                                                                                                                                                                                                                                                                                        |                 |                     |                          |                     | >dbj BAD87130.1  magmas-like protein [Oryza sativa (japonica cultivar-group)]dbj BAD87219.1  magmas-like protein [Oryza sativa (japonica cultivar-group)]                                                                                                                                                                                                                                                                                                                                                                                                                                                                                                                                                                                                                                                                                                                                                                                                                                                                                                                                    | 113   | 3E-42   |
|                                                                                                                                                                                                                                                                                                                                                                                                        |                 |                     |                          |                     | >ref NP_914245.1  P0401G10.24 [Oryza sativa (japonica cultivar-group)]                                                                                                                                                                                                                                                                                                                                                                                                                                                                                                                                                                                                                                                                                                                                                                                                                                                                                                                                                                                                                       | 264   | 1E-41   |
|                                                                                                                                                                                                                                                                                                                                                                                                        |                 |                     |                          |                     | >ref NP_567078.1  TXR1 (THAXTOMIN A RESISTANT 1) [Arabidopsis thaliana]gb AAM63549.1  thaxtomin resistance protein TXR1 [Arabidopsis thaliana] gb AAL06797.1  AT3g59280/F25L23_140 [Arabidopsis thaliana] gb AAK55724.1  AT3g59280/F25L23_140 [Arabidopsis thaliana]                                                                                                                                                                                                                                                                                                                                                                                                                                                                                                                                                                                                                                                                                                                                                                                                                         | 116   | 2E-37   |
| BM073916                                                                                                                                                                                                                                                                                                                                                                                               | 3.34E-03        | F1=Mo17<B73         | 5.01                     | 9                   | ns                                                                                                                                                                                                                                                                                                                                                                                                                                                                                                                                                                                                                                                                                                                                                                                                                                                                                                                                                                                                                                                                                           |       |         |
| DV491092                                                                                                                                                                                                                                                                                                                                                                                               | 3.35E-03        | B73=F1<Mo17         | 1.39                     | 5                   | >ref XP_450956.1  unknown protein [Oryza sativa (japonica cultivar-group)]dbj BAD22260.1  unknown protein [Oryza sativa (japonica cultivar-group)]                                                                                                                                                                                                                                                                                                                                                                                                                                                                                                                                                                                                                                                                                                                                                                                                                                                                                                                                           | 189   | 3E-13   |
|                                                                                                                                                                                                                                                                                                                                                                                                        |                 |                     |                          |                     | dbj BAD19750.1  unknown protein [Oryza sativa (japonica cultivar-group)]                                                                                                                                                                                                                                                                                                                                                                                                                                                                                                                                                                                                                                                                                                                                                                                                                                                                                                                                                                                                                     |       |         |
| CB331768                                                                                                                                                                                                                                                                                                                                                                                               | 3.36E-03        | Mo17<B73=F1         | 1.49                     | 10                  | >ref XP_483015.1  unknown protein [Oryza sativa (japonica cultivar-group)]dbj BAD09300.1  unknown protein [Oryza sativa (japonica cultivar-group)]                                                                                                                                                                                                                                                                                                                                                                                                                                                                                                                                                                                                                                                                                                                                                                                                                                                                                                                                           | 191   | 5E-9    |
|                                                                                                                                                                                                                                                                                                                                                                                                        |                 |                     |                          |                     | dbj BAD10699.1  unknown protein [Oryza sativa (japonica cultivar-group)]                                                                                                                                                                                                                                                                                                                                                                                                                                                                                                                                                                                                                                                                                                                                                                                                                                                                                                                                                                                                                     |       |         |
|                                                                                                                                                                                                                                                                                                                                                                                                        |                 |                     |                          |                     | >ref XP_463045.1  expressed protein [Oryza sativa (japonica cultivar-group)]gb AAS07181.1  expressed protein [Oryza sativa (japonica cultivar-group)]                                                                                                                                                                                                                                                                                                                                                                                                                                                                                                                                                                                                                                                                                                                                                                                                                                                                                                                                        | 91    | 6E-13   |
| BM073171                                                                                                                                                                                                                                                                                                                                                                                               | 3.38E-03        | Mo17<B73            | 1.45                     | 9                   | >emb CAJ13713.1  hypothetical protein [Capsicum chinense]                                                                                                                                                                                                                                                                                                                                                                                                                                                                                                                                                                                                                                                                                                                                                                                                                                                                                                                                                                                                                                    | 96    | 1E-11   |
|                                                                                                                                                                                                                                                                                                                                                                                                        |                 |                     |                          |                     | >ref NP_850005.1  unknown protein [Arabidopsis thaliana]gb AAK00397.1  unknown protein [Arabidopsis thaliana] gb AAG41478.1  unknown protein [Arabidopsis thaliana] gb AAL06786.1  At2g20820/F5H14.21 [Arabidopsis thaliana] gb AAG40023.1  At2g20820 [Arabidopsis thaliana] gb AAK55709.1  At2g20820/F5H14.21 [Arabidopsis thaliana]                                                                                                                                                                                                                                                                                                                                                                                                                                                                                                                                                                                                                                                                                                                                                        | 93    | 3E-9    |
|                                                                                                                                                                                                                                                                                                                                                                                                        |                 |                     |                          |                     | >gb AAM65603.1  transmembrane protein, putative [Arabidopsis thaliana]                                                                                                                                                                                                                                                                                                                                                                                                                                                                                                                                                                                                                                                                                                                                                                                                                                                                                                                                                                                                                       | 230   | 3E-32   |
|                                                                                                                                                                                                                                                                                                                                                                                                        |                 |                     |                          |                     | >ref NP_173923.1  unknown protein [Arabidopsis thaliana]gb AAG50804.1  transmembrane protein, putative [Arabidopsis thaliana] gb AAO42430.1  putative transmembrane protein [Arabidopsis thaliana] gb AAO22664.1  putative transmembrane protein [Arabidopsis thaliana]                                                                                                                                                                                                                                                                                                                                                                                                                                                                                                                                                                                                                                                                                                                                                                                                                      | 230   | 3E-32   |
|                                                                                                                                                                                                                                                                                                                                                                                                        |                 |                     |                          |                     | >ref NP_177032.1  unknown protein [Arabidopsis thaliana]dbj BAC43336.1  putative transmembrane protein [Arabidopsis thaliana] gb AAD49978.1  Is a member of PF01169 Uncharacterized (transmembrane domain) protein family. [Arabidopsis thaliana]                                                                                                                                                                                                                                                                                                                                                                                                                                                                                                                                                                                                                                                                                                                                                                                                                                            | 228   | 3E-32   |
| CB334551                                                                                                                                                                                                                                                                                                                                                                                               | 3.38E-03        | F1=Mo17<B73         | 1.41                     | 9                   | >emb CAJ07116.1  membrane protein, putative [Leishmania major]                                                                                                                                                                                                                                                                                                                                                                                                                                                                                                                                                                                                                                                                                                                                                                                                                                                                                                                                                                                                                               | 252   | 1E-18   |
|                                                                                                                                                                                                                                                                                                                                                                                                        |                 |                     |                          |                     | >gb AAH89176.1  Unknown (protein for MGC:98993) [Xenopus laevis]                                                                                                                                                                                                                                                                                                                                                                                                                                                                                                                                                                                                                                                                                                                                                                                                                                                                                                                                                                                                                             | 242   | 2E-18   |
| CB351515                                                                                                                                                                                                                                                                                                                                                                                               | 3.39E-03        | Mo17<B73=F1         | 1.46                     | 10                  | >gb AAX92922.1  Kelch motif, putative [Oryza sativa (japonica cultivar-group)]gb ABA92301.1  Kelch motif, putative [Oryza sativa (japonica cultivar-group)]                                                                                                                                                                                                                                                                                                                                                                                                                                                                                                                                                                                                                                                                                                                                                                                                                                                                                                                                  | 383   | 9E-16   |
| DV494470                                                                                                                                                                                                                                                                                                                                                                                               | 3.41E-03        | Mo17<B73=F1         | 1.54                     | 10                  | >gb AAV28627.1  putative 60S ribosomal protein L31 [Zea mays]                                                                                                                                                                                                                                                                                                                                                                                                                                                                                                                                                                                                                                                                                                                                                                                                                                                                                                                                                                                                                                | 124   | 4E-43   |
|                                                                                                                                                                                                                                                                                                                                                                                                        |                 |                     |                          |                     | >ref XP_483237.1  putative 60S ribosomal protein L31 [Oryza sativa (japonica cultivar-group)] dbj BAD10170.1  putative 60S ribosomal protein L31 [Oryza sativa (japonica cultivar-group)] dbj BAD08833.1  putative 60S ribosomal protein L31 [Oryza sativa (japonica cultivar-group)]                                                                                                                                                                                                                                                                                                                                                                                                                                                                                                                                                                                                                                                                                                                                                                                                        | 122   | 8E-43   |
|                                                                                                                                                                                                                                                                                                                                                                                                        |                 |                     |                          |                     | >dbj BAD61612.1  putative 60S ribosomal protein L31 [Oryza sativa (japonica cultivar-group)]                                                                                                                                                                                                                                                                                                                                                                                                                                                                                                                                                                                                                                                                                                                                                                                                                                                                                                                                                                                                 | 124   | 1E-42   |
|                                                                                                                                                                                                                                                                                                                                                                                                        |                 |                     |                          |                     | >ref XP_467485.1  putative 60S ribosomal protein L31 [Oryza sativa (japonica cultivar-group)] dbj BAD12898.1  putative 60S ribosomal protein L31 [Oryza sativa (japonica cultivar-group)]                                                                                                                                                                                                                                                                                                                                                                                                                                                                                                                                                                                                                                                                                                                                                                                                                                                                                                    | 123   | 2E-42   |
|                                                                                                                                                                                                                                                                                                                                                                                                        |                 |                     |                          |                     | >gb AAV92213.1  60S ribosomal protein L31a [Pseudotsuga menziesii var. menziesii]gb AAV92212.1  60S ribosomal protein L31a [Pseudotsuga menziesii var. menziesii] gb AAV92211.1  60S ribosomal protein L31a [Pseudotsuga menziesii var. menziesii] gb AAV92210.1  60S ribosomal protein L31a [Pseudotsuga menziesii var. menziesii] gb AAV92209.1  60S ribosomal protein L31a [Pseudotsuga menziesii var. menziesii] gb AAV92208.1  60S ribosomal protein L31a [Pseudotsuga menziesii var. menziesii] gb AAV92207.1  60S ribosomal protein L31a [Pseudotsuga menziesii var. menziesii] gb AAV92206.1  60S ribosomal protein L31a [Pseudotsuga menziesii var. menziesii] gb AAV92205.1  60S ribosomal protein L31a [Pseudotsuga menziesii var. menziesii] gb AAV92204.1  60S ribosomal protein L31a [Pseudotsuga menziesii var. menziesii] gb AAV92203.1  60S ribosomal protein L31a [Pseudotsuga menziesii var. menziesii] gb AAV92202.1  60S ribosomal protein L31a [Pseudotsuga menziesii var. menziesii] gb AAV92201.1  60S ribosomal protein L31a [Pseudotsuga menziesii var. menziesii] | 113   | 1E-40   |
|                                                                                                                                                                                                                                                                                                                                                                                                        |                 |                     |                          |                     | >ref XP_482379.1  putative RNA binding protein [Oryza sativa (japonica cultivar-group)] ref XP_507581.1  PREDICTED OSJNBa0007M04.13 gene product [Oryza sativa (japonica cultivar-group)] ref XP_507230.1  PREDICTED OSJNBa0007M04.13 gene product [Oryza sativa (japonica cultivar-group)]                                                                                                                                                                                                                                                                                                                                                                                                                                                                                                                                                                                                                                                                                                                                                                                                  | 214   | 3E-80   |
|                                                                                                                                                                                                                                                                                                                                                                                                        |                 |                     |                          |                     | dbj BAC99692.1  putative RNA binding protein [Oryza sativa (japonica cultivar-group)]                                                                                                                                                                                                                                                                                                                                                                                                                                                                                                                                                                                                                                                                                                                                                                                                                                                                                                                                                                                                        | 197   | 3E-72   |
|                                                                                                                                                                                                                                                                                                                                                                                                        |                 |                     |                          |                     | >emb CAE00870.1  TA8 protein [Oryza sativa (japonica cultivar-group)]                                                                                                                                                                                                                                                                                                                                                                                                                                                                                                                                                                                                                                                                                                                                                                                                                                                                                                                                                                                                                        | 218   | 4E-67   |
|                                                                                                                                                                                                                                                                                                                                                                                                        |                 |                     |                          |                     | >gb AAL76994.1  RNA binding protein [Elaeis oleifera]                                                                                                                                                                                                                                                                                                                                                                                                                                                                                                                                                                                                                                                                                                                                                                                                                                                                                                                                                                                                                                        | 217   | 8E-66   |
|                                                                                                                                                                                                                                                                                                                                                                                                        |                 |                     |                          |                     | >gb ABB87134.1  RNA binding protein-like protein [Solanum tuberosum]                                                                                                                                                                                                                                                                                                                                                                                                                                                                                                                                                                                                                                                                                                                                                                                                                                                                                                                                                                                                                         |       |         |
| >ref NP_196080.1  RNA binding / nucleic acid binding [Arabidopsis thaliana]emb CAB85566.1  rna binding protein-like [Arabidopsis thaliana] gb AAM67546.1  putative RNA binding protein [Arabidopsis thaliana] gb AAL36178.1  putative rna binding protein [Arabidopsis thaliana] gb AAL06954.1  AT5g04600/T32M21_200 [Arabidopsis thaliana] gb AAK55702.1  AT5g04600/T32M21_200 [Arabidopsis thaliana] | 222             | 3E-56               |                          |                     |                                                                                                                                                                                                                                                                                                                                                                                                                                                                                                                                                                                                                                                                                                                                                                                                                                                                                                                                                                                                                                                                                              |       |         |

**Table 4. Microarray analysis results, mode of gene action classification, and BLAST annotation for the 1,367 ESTs identified as differentially expressed among genotypes (15% FDR)**

| GenBank accession no. | Overall P value | Significant pattern | Fold change <sup>†</sup> | Sector <sup>‡</sup> | BLAST annotation*                                                                                                                                                                                                                                                                                                                                                                                   | Score | E value |
|-----------------------|-----------------|---------------------|--------------------------|---------------------|-----------------------------------------------------------------------------------------------------------------------------------------------------------------------------------------------------------------------------------------------------------------------------------------------------------------------------------------------------------------------------------------------------|-------|---------|
| DV551199              | 3.42E-03        | Mo17<B73            | 1.42                     | 9                   | >gb AAO72563.1  elongation factor 1 gamma-like protein [Oryza sativa (japonicacultivar-group)]                                                                                                                                                                                                                                                                                                      | 413   | 7E-87   |
|                       |                 |                     |                          |                     | >dbj BAD61932.1  putative elongation factor 1 gamma [Oryza sativa (japonicacultivar-group)] dbj BAD61828.1  putative elongation factor 1 gamma [Oryza sativa (japonica cultivar-group)]                                                                                                                                                                                                             | 416   | 7E-87   |
|                       |                 |                     |                          |                     | >ref XP_464690.1  Elongation factor 1-gamma [Oryza sativa (japonica cultivar-group)]dbj BAD17615.1  Elongation factor 1-gamma [Oryza sativa (japonica cultivar-group)] sp Q9ZRI7 EF1G ORYSA Elongation factor 1-gamma (EF-1-gamma) (eEF-1B gamma) dbj BAA34206.1  elongation factor 1B gamma [Oryza sativa (japonica cultivar-group)]                                                               | 418   | 5E-86   |
|                       |                 |                     |                          |                     | >gb AAO72574.1  elongation factor 1 gamma-like protein [Oryza sativa (japonicacultivar-group)]                                                                                                                                                                                                                                                                                                      | 409   | 1E-85   |
|                       |                 |                     |                          |                     | >ref XP_464689.1  putative elongation factor 1-gamma [Oryza sativa (japonicacultivar-group)] dbj BAD17614.1  putative elongation factor 1-gamma [Oryza sativa (japonica cultivar-group)]                                                                                                                                                                                                            | 414   | 1E-85   |
| CD058927              | 3.44E-03        | B73<F1=Mo17         | 1.98                     | 3                   | >ref XP_469890.1  putative aurora-related kinase [Oryza sativa (japonicacultivar-group)] gb AAP50960.1  putative aurora-related kinase [Oryza sativa (japonica cultivar-group)] dbj BAE00023.1  Aurora kinase [Oryza sativa (japonica cultivar-group)]                                                                                                                                              | 279   | 1E-82   |
|                       |                 |                     |                          |                     | >ref NP_182073.1  ATP binding / protein kinase/ protein serine/threonine kinase/protein-tyrosine kinase [Arabidopsis thaliana] emb CAH69534.1  aurora-like kinase 3 [Arabidopsis thaliana] dbj BAE00021.1  Aurora kinase [Arabidopsis thaliana] gb AAC06151.1  putative protein kinase [Arabidopsis thaliana] gb AAL69469.1  At2g45490/F17K2.2 [Arabidopsis thaliana]                               | 288   | 6E-62   |
|                       |                 |                     |                          |                     | >ref NP_195009.1  kinase/ protein serine/threonine kinase [Arabidopsis thaliana]emb CAB80000.1  putative serine/threonine protein kinase [Arabidopsis thaliana] emb CAH69532.1  aurora-like kinase 1 [Arabidopsis thaliana] dbj BAD95178.1  putative serine/threonine protein kinase [Arabidopsis thaliana] dbj BAE00019.1  Aurora kinase [Arabidopsis thaliana]                                    | 294   | 3E-56   |
|                       |                 |                     |                          |                     | >gb AAM64506.1  putative serine/threonine protein kinase [Arabidopsis thaliana]                                                                                                                                                                                                                                                                                                                     | 294   | 6E-56   |
|                       |                 |                     |                          |                     | >emb CAH69533.1  aurora-like kinase 2 [Arabidopsis thaliana]gb AAR07517.1  At2g25880 [Arabidopsis thaliana] dbj BAE00020.1  Aurora kinase [Arabidopsis thaliana] gb AAC42257.1  putative protein kinase [Arabidopsis thaliana]                                                                                                                                                                      | 282   | 2E-55   |
|                       |                 |                     |                          |                     | >gb ABA99041.1  F-box protein family, putative [Oryza sativa (japonicacultivar-group)]                                                                                                                                                                                                                                                                                                              | 399   | 8E-60   |
|                       |                 |                     |                          |                     | >dbj BAB03143.1  ankyrin-like protein [Arabidopsis thaliana]                                                                                                                                                                                                                                                                                                                                        | 1100  | 1E-20   |
|                       |                 |                     |                          |                     | >gb AAG51006.1  hypothetical protein; 96168-94294 [Arabidopsis thaliana]                                                                                                                                                                                                                                                                                                                            | 455   | 6E-20   |
| DV490811              | 3.46E-03        | Mo17<B73=F1         | 1.83                     | 10                  | >gb AAM63646.1  unknown [Arabidopsis thaliana]                                                                                                                                                                                                                                                                                                                                                      | 422   | 8E-20   |
|                       |                 |                     |                          |                     | >ref NP_566421.1  unknown protein [Arabidopsis thaliana]gb AAN71924.1  putative F-box protein family [Arabidopsis thaliana]                                                                                                                                                                                                                                                                         | 422   | 8E-20   |
|                       |                 |                     |                          |                     | >gb ABA99041.1  F-box protein family, putative [Oryza sativa (japonicacultivar-group)]                                                                                                                                                                                                                                                                                                              | 399   | 8E-60   |
|                       |                 |                     |                          |                     | >dbj BAB03143.1  ankyrin-like protein [Arabidopsis thaliana]                                                                                                                                                                                                                                                                                                                                        | 1100  | 1E-20   |
|                       |                 |                     |                          |                     | >gb AAG51006.1  hypothetical protein; 96168-94294 [Arabidopsis thaliana]                                                                                                                                                                                                                                                                                                                            | 455   | 6E-20   |
| DV495228              | 3.47E-03        | B73=F1<Mo17         | 1.79                     | 4                   | ns                                                                                                                                                                                                                                                                                                                                                                                                  |       |         |
|                       |                 |                     |                          |                     | >ref XP_450550.1  apospory-associated protein C-like [Oryza sativa (japonicacultivar-group)] dbj BAD23600.1  apospory-associated protein C-like [Oryza sativa (japonica cultivar-group)]                                                                                                                                                                                                            | 319   | 2E-74   |
| CAB29886              | 3.49E-03        | Mo17<B73=F1         | 1.26                     | 10                  | >ref NP_201454.1  aldose 1-epimerase [Arabidopsis thaliana]gb AAN15356.1  apospory-associated protein C-like protein [Arabidopsis thaliana] gb AAM53269.1  apospory-associated protein C-like protein [Arabidopsis thaliana] dbj BAB10929.1  apospory-associated protein C-like [Arabidopsis thaliana]                                                                                              | 307   | 8E-48   |
|                       |                 |                     |                          |                     | >gb AAF34174.1  apospory-associated protein C; APOC [Chlamydomonas reinhardtii]                                                                                                                                                                                                                                                                                                                     | 338   | 2E-37   |
|                       |                 |                     |                          |                     | >ref XP_480917.1  putative Aldose 1-epimerase [Oryza sativa (japonicacultivar-group)] dbj BAD05576.1  putative Aldose 1-epimerase [Oryza sativa (japonica cultivar-group)] dbj BAD05401.1  putative Aldose 1-epimerase [Oryza sativa (japonica cultivar-group)]                                                                                                                                     | 337   | 1E-18   |
|                       |                 |                     |                          |                     | >ref XP_473781.1  OSJNBa0041A02.19 [Oryza sativa (japonica cultivar-group)]emb CAE01826.2  OSJNBa0041A02.19 [Oryza sativa (japonica cultivar-group)]                                                                                                                                                                                                                                                | 325   | 2E-18   |
|                       |                 |                     |                          |                     | >emb CAA48638.1  cyclophilin [Zea mays]sp P21569 CYPH_MAIZE Peptidyl-prolyl cis-trans isomerase (PPIase) (Rotamase) (Cyclophilin) (Cyclosporin A-binding protein) gb AAA63403.1  cyclophilin                                                                                                                                                                                                        | 172   | 1E-86   |
|                       |                 |                     |                          |                     | >ref XP_463914.1  peptidylprolyl isomerase Cyp2 [Oryza sativa (japonicacultivar-group)] ref XP_506694.1  PREDICTED OSJNBb0088N06.23 gene product [Oryza sativa (japonica cultivar-group)] dbj BAD07601.1  peptidylprolyl isomerase Cyp2 [Oryza sativa (japonica cultivar-group)] dbj BAD08141.1  peptidylprolyl isomerase Cyp2 [Oryza sativa (japonica cultivar-group)] gb AA57045.1  cyclophilin 2 | 172   | 3E-75   |
| CB381648              | 3.51E-03        | F1=Mo17<B73         | 1.24                     | 9                   | >gb AAK49427.1  cyclophilin A-2 [Triticum aestivum]gb AAS17067.1  cyclophilin A [Triticum aestivum]                                                                                                                                                                                                                                                                                                 | 171   | 4E-75   |
|                       |                 |                     |                          |                     | >gb AAK49428.1  cyclophilin A-3 [Triticum aestivum]gb AAK49426.1  cyclophilin A-1 [Triticum aestivum]                                                                                                                                                                                                                                                                                               | 171   | 6E-75   |
|                       |                 |                     |                          |                     | >gb AA57046.1  cyclophilin 2                                                                                                                                                                                                                                                                                                                                                                        | 172   | 1E-74   |
|                       |                 |                     |                          |                     | >gb AAV44197.1  putative beta-N-acetylhexosaminidase [Oryza sativa (japonicacultivar-group)] gb AAU44085.1  putative beta-N-acetylhexosaminidase [Oryza sativa (japonica cultivar-group)]                                                                                                                                                                                                           | 541   | 2E-53   |
|                       |                 |                     |                          |                     | >emb CAB75760.1  beta-N-acetylhexosaminidase-like protein [Arabidopsis thaliana]                                                                                                                                                                                                                                                                                                                    | 557   | 1E-45   |
| CB605143              | 3.52E-03        | Mo17<B73=F1         | 1.28                     | 10                  | >gb AAN41320.1  putative beta-N-acetylhexosaminidase [Arabidopsis thaliana]gb AAM61367.1  beta-N-acetylhexosaminidase-like protein [Arabidopsis thaliana]                                                                                                                                                                                                                                           | 445   | 1E-45   |
|                       |                 |                     |                          |                     | >ref NP_567017.2  beta-N-acetylhexosaminidase/ hydrolase, hydrolyzing O-glycosylcompounds [Arabidopsis thaliana]                                                                                                                                                                                                                                                                                    | 541   | 1E-45   |
|                       |                 |                     |                          |                     | >dbj BAD87534.1  putative beta-N-acetylhexosaminidase [Oryza sativa (japonicacultivar-group)]                                                                                                                                                                                                                                                                                                       | 526   | 9E-34   |
|                       |                 |                     |                          |                     | >ref XP_478414.1  putative translational inhibitor protein [Oryza sativa (japonicacultivar-group)] dbj BAC20708.1  putative translational inhibitor protein [Oryza sativa (japonica cultivar-group)] dbj BAD31311.1  putative translational inhibitor protein [Oryza sativa (japonica cultivar-group)]                                                                                              | 180   | 2E-58   |
|                       |                 |                     |                          |                     | >dbj BAD00048.1  perchloric acid soluble translation inhibitor protein homolog[Gentiana triflora] dbj BAC66487.1  translation-inhibitor protein [Gentiana triflora]                                                                                                                                                                                                                                 | 188   | 2E-54   |
| CD527140              | 3.54E-03        | Mo17<B73=F1         | 1.33                     | 10                  | >ref NP_188674.1  endoribonuclease [Arabidopsis thaliana]gb AAK53030.1  AT3g20390/MQC12_15 [Arabidopsis thaliana] gb AAL31178.1  AT3g20390/MQC12_15 [Arabidopsis thaliana] gb AAM63246.1  translational inhibitor protein, putative [Arabidopsis thaliana]                                                                                                                                          | 187   | 7E-53   |
|                       |                 |                     |                          |                     | >dbj BAB02821.1  unnamed protein product [Arabidopsis thaliana]                                                                                                                                                                                                                                                                                                                                     | 143   | 7E-53   |

**Table 4. Microarray analysis results, mode of gene action classification, and BLAST annotation for the 1,367 ESTs identified as differentially expressed among genotypes (15% FDR)**

| GenBank accession no.                                                                                                                                    | Overall P value | Significant pattern | Fold change <sup>†</sup> | Sector <sup>‡</sup> | BLAST annotation*                                                                                                                                                                                                                                                                                                | Score | E value |
|----------------------------------------------------------------------------------------------------------------------------------------------------------|-----------------|---------------------|--------------------------|---------------------|------------------------------------------------------------------------------------------------------------------------------------------------------------------------------------------------------------------------------------------------------------------------------------------------------------------|-------|---------|
| CB604473                                                                                                                                                 | 3.54E-03        | B73<F1=Mo17         | 1.38                     | 2                   | >emb CAE56534.1  Hypothetical protein CBG24261 [Caenorhabditis briggsae]                                                                                                                                                                                                                                         | 172   | 1E-32   |
|                                                                                                                                                          |                 |                     |                          |                     | >dbj BAD53747.1  putative T complex protein [Oryza sativa (japonica cultivar-group)]                                                                                                                                                                                                                             | 535   | 4E-69   |
|                                                                                                                                                          |                 |                     |                          |                     | >prf 2206327A T complex protein                                                                                                                                                                                                                                                                                  | 534   | 1E-66   |
|                                                                                                                                                          |                 |                     |                          |                     | >gb AAD11431.1  T-complex protein 1 epsilon subunit [Mesembryanthemum crystallinum]                                                                                                                                                                                                                              | 418   | 3E-65   |
|                                                                                                                                                          |                 |                     |                          |                     | >emb CAA53397.1  t complex polypeptide 1 [Avena sativa]sp P54411 TCPE2_AVESA T-complex protein 1 subunit epsilon (TCP-1-epsilon) (CCT-epsilon) (TCP-K36)                                                                                                                                                         | 535   | 7E-65   |
| >emb CAA53396.1  T complex polypeptide 1 [Avena sativa]sp P40412 TCPE1_AVESA T-complex protein 1 subunit epsilon (TCP-1-epsilon) (CCT-epsilon) (TCP-K19) | 535             | 7E-65               |                          |                     |                                                                                                                                                                                                                                                                                                                  |       |         |
| CB380842                                                                                                                                                 | 3.55E-03        | F1=Mo17<B73         | 1.25                     | 9                   | >gb ABA98950.1  expressed protein [Oryza sativa (japonica cultivar-group)]                                                                                                                                                                                                                                       | 880   | 2E-71   |
|                                                                                                                                                          |                 |                     |                          |                     | >ref NP_180698.1  ATP binding / damaged DNA binding [Arabidopsis thaliana]gb AAD26479.1  unknown protein [Arabidopsis thaliana]                                                                                                                                                                                  | 918   | 4E-35   |
|                                                                                                                                                          |                 |                     |                          |                     | >gb AAC97219.1  hypothetical protein [Arabidopsis thaliana]                                                                                                                                                                                                                                                      | 1107  | 4E-19   |
|                                                                                                                                                          |                 |                     |                          |                     | >gb AAM62704.1  unknown [Arabidopsis thaliana]                                                                                                                                                                                                                                                                   | 463   | 4E-19   |
|                                                                                                                                                          |                 |                     |                          |                     | >ref NP_565422.1  unknown protein [Arabidopsis thaliana]gb AAO64123.1  unknown protein [Arabidopsis thaliana] gb AAO42121.1  unknown protein [Arabidopsis thaliana] pir A84555 hypothetical protein At2g17670 [imported] - Arabidopsis thaliana                                                                  | 463   | 4E-19   |
| CD001778                                                                                                                                                 | 3.57E-03        | Mo17<B73=F1         | 1.45                     | 10                  | >ref NP_921446.1  unknown protein [Oryza sativa (japonica cultivar-group)]                                                                                                                                                                                                                                       | 713   | 1E-25   |
|                                                                                                                                                          |                 |                     |                          |                     | >gb AAP80664.1  S28 ribosomal protein [Triticum aestivum]                                                                                                                                                                                                                                                        | 86    | 7E-22   |
|                                                                                                                                                          |                 |                     |                          |                     | >emb CAA04565.1  rpS28 [Hordeum vulgare subsp. vulgare]                                                                                                                                                                                                                                                          | 65    | 4E-21   |
|                                                                                                                                                          |                 |                     |                          |                     | >emb CAA57636.1  small subunit ribosomal protein S28 [Zea mays]sp P46302 RS28 MAIZE 40S ribosomal protein S28                                                                                                                                                                                                    | 65    | 6E-21   |
|                                                                                                                                                          |                 |                     |                          |                     | >emb CAA10103.1  ribosomal protein S28 [Prunus persica]emb CAA10102.1  ribosomal protein S28 [Prunus persica] emb CAA10101.1  ribosomal protein S28 [Prunus persica]                                                                                                                                             | 65    | 2E-19   |
| DV491600                                                                                                                                                 | 3.57E-03        | B73<F1=Mo17         | 1.53                     | 3                   | ns                                                                                                                                                                                                                                                                                                               |       |         |
| CB351568                                                                                                                                                 | 3.58E-03        | Mo17<B73=F1         | 3.45                     | 10                  | >ref XP_464072.1  RNA recognition motif (RRM)-containing protein-like [Oryza sativa(japonica cultivar-group)] dbj BAD10531.1  RNA recognition motif (RRM)-containing protein-like [Oryza sativa (japonica cultivar-group)]                                                                                       | 552   | 2E-85   |
|                                                                                                                                                          |                 |                     |                          |                     | >gb AAM98125.1  unknown protein [Arabidopsis thaliana]                                                                                                                                                                                                                                                           | 748   | 6E-44   |
|                                                                                                                                                          |                 |                     |                          |                     | >ref NP_200621.1  nucleic acid binding [Arabidopsis thaliana]dbj BAB11005.1  unnamed protein product [Arabidopsis thaliana]                                                                                                                                                                                      | 748   | 6E-44   |
|                                                                                                                                                          |                 |                     |                          |                     | >ref NP_913805.1  hypothetical protein [Oryza sativa (japonica cultivar-group)]dbj BAD05411.1  hypothetical protein [Oryza sativa (japonica cultivar-group)] dbj BAC22576.1  hypothetical protein [Oryza sativa (japonica cultivar-group)]                                                                       | 146   | 2E-7    |
|                                                                                                                                                          |                 |                     |                          |                     | >emb CAH90090.1  hypothetical protein [Pongo pygmaeus]                                                                                                                                                                                                                                                           | 1167  | 4E-7    |
| BM073657                                                                                                                                                 | 3.59E-03        | F1=Mo17<B73         | 1.79                     | 9                   | >emb CAA73068.1  serine/threonine kinase [Sorghum bicolor]                                                                                                                                                                                                                                                       | 440   | 5E-19   |
|                                                                                                                                                          |                 |                     |                          |                     | >emb CAA73067.1  serine/threonine kinase [Sorghum bicolor]                                                                                                                                                                                                                                                       | 440   | 1E-16   |
|                                                                                                                                                          |                 |                     |                          |                     | >gb ABA91407.1  serine/threonine kinase SNFL1, putative [Oryza sativa (japonica cultivar-group)]                                                                                                                                                                                                                 | 454   | 3E-16   |
|                                                                                                                                                          |                 |                     |                          |                     | >dbj BAD95889.1  Ser/Thr protein kinase [Lotus corniculatus var. japonicus]                                                                                                                                                                                                                                      | 441   | 2E-12   |
|                                                                                                                                                          |                 |                     |                          |                     | >ref XP_479600.1  putative serine/threonine kinase [Oryza sativa (japonica cultivar-group)] dbj BAD30291.1  putative serine/threonine kinase [Oryza sativa (japonica cultivar-group)] dbj BAC10350.1  putative serine/threonine kinase [Oryza sativa (japonica cultivar-group)]                                  | 445   | 5E-11   |
| CD651115                                                                                                                                                 | 3.59E-03        | B73<F1=Mo17         | 1.23                     | 2                   | >ref XP_469436.1  beta-glucosidase (with alternative splicing) [Oryza sativa(japonica cultivar-group)] gb AAX95519.1  Putative Glycosyl hydrolase family 1 protein [Oryza sativa (japonica cultivar-group)] gb AAS07254.1  beta-glucosidase (with alternative splicing) [Oryza sativa (japonica cultivar-group)] | 504   | 8E-63   |
|                                                                                                                                                          |                 |                     |                          |                     | >gb AA84906.2  beta-glucosidase [Oryza sativa]                                                                                                                                                                                                                                                                   | 504   | 8E-63   |
|                                                                                                                                                          |                 |                     |                          |                     | >gb AAX95520.1  Putative Glycosyl hydrolase family 1 protein [Oryza sativa(japonica cultivar-group)]                                                                                                                                                                                                             | 603   | 5E-52   |
|                                                                                                                                                          |                 |                     |                          |                     | >ref XP_469438.1  putative beta-glucosidase [Oryza sativa (japonica cultivar-group)]gb AAS07251.1  putative beta-glucosidase [Oryza sativa (japonica cultivar-group)]                                                                                                                                            | 568   | 5E-52   |
|                                                                                                                                                          |                 |                     |                          |                     | >dbj BAD73293.1  putative beta-glucosidase [Oryza sativa (japonica cultivar-group)]                                                                                                                                                                                                                              | 516   | 7E-48   |
| BM079585                                                                                                                                                 | 3.59E-03        | F1=Mo17<B73         | 1.67                     | 9                   | >gb ABA99330.1  expressed protein [Oryza sativa (japonica cultivar-group)]                                                                                                                                                                                                                                       | 197   | 3E-18   |
|                                                                                                                                                          |                 |                     |                          |                     | >ref NP_192227.1  unknown protein [Arabidopsis thaliana]gb AAD14446.1  predicted protein of unknown function [Arabidopsis thaliana] emb CAB77803.1  predicted protein of unknown function [Arabidopsis thaliana] gb AAM66022.1  unknown [Arabidopsis thaliana]                                                   | 185   | 8E-10   |
|                                                                                                                                                          |                 |                     |                          |                     | >ref XP_483755.1  putative 60S ribosomal protein L10A (RPL10aC) [Oryza sativa(japonica cultivar-group)] dbj BAD09090.1  putative 60S ribosomal protein L10A (RPL10aC) [Oryza sativa (japonica cultivar-group)]                                                                                                   |       |         |
| CD651681                                                                                                                                                 | 3.62E-03        | Mo17<B73=F1         | 1.25                     | 11                  | >dbj BAD28853.1  putative ribosomal protein L10a [Oryza sativa (japonica cultivar-group)]                                                                                                                                                                                                                        | 216   | 3E-88   |
|                                                                                                                                                          |                 |                     |                          |                     | >gb AAW50982.1  ribosomal protein L10A [Triticum aestivum]                                                                                                                                                                                                                                                       | 216   | 7E-86   |
|                                                                                                                                                          |                 |                     |                          |                     | >ref NP_563813.2  structural constituent of ribosome [Arabidopsis thaliana]gb AAM47861.1  putative ribosomal protein L10 [Arabidopsis thaliana]                                                                                                                                                                  | 216   | 2E-84   |
|                                                                                                                                                          |                 |                     |                          |                     | gb AAL38253.1  putative ribosomal protein L10 [Arabidopsis thaliana] sp Q8VZB9 R10AA ARATH 60S ribosomal protein L10a-1                                                                                                                                                                                          | 216   | 7E-83   |
|                                                                                                                                                          |                 |                     |                          |                     |                                                                                                                                                                                                                                                                                                                  |       |         |

**Table 4. Microarray analysis results, mode of gene action classification, and BLAST annotation for the 1,367 ESTs identified as differentially expressed among genotypes (15% FDR)**

| GenBank accession no. | Overall P value | Significant pattern | Fold change <sup>±</sup> | Sector <sup>±</sup> | BLAST annotation*                                                                                                                                                                                                                                                                                                                                                                                                                                                                                                                                                                                                                                                                                                                                                                                                                                                                                                                                                                                                                                                                                                                                                                                                                                                                                                                                                                                                                                                                                                                                                                                                                                                                                                                                                                                                                                                                                                                                                                                                                                                                                               | Score | E value |
|-----------------------|-----------------|---------------------|--------------------------|---------------------|-----------------------------------------------------------------------------------------------------------------------------------------------------------------------------------------------------------------------------------------------------------------------------------------------------------------------------------------------------------------------------------------------------------------------------------------------------------------------------------------------------------------------------------------------------------------------------------------------------------------------------------------------------------------------------------------------------------------------------------------------------------------------------------------------------------------------------------------------------------------------------------------------------------------------------------------------------------------------------------------------------------------------------------------------------------------------------------------------------------------------------------------------------------------------------------------------------------------------------------------------------------------------------------------------------------------------------------------------------------------------------------------------------------------------------------------------------------------------------------------------------------------------------------------------------------------------------------------------------------------------------------------------------------------------------------------------------------------------------------------------------------------------------------------------------------------------------------------------------------------------------------------------------------------------------------------------------------------------------------------------------------------------------------------------------------------------------------------------------------------|-------|---------|
|                       |                 |                     |                          |                     | >ref NP_850104.1  structural constituent of ribosome [Arabidopsis thaliana]ref NP_565654.1  structural constituent of ribosome [Arabidopsis thaliana]<br>gb AAL07257.1  putative 60S ribosomal protein L10A [Arabidopsis thaliana] gb AAK25856.1  putative 60S ribosomal protein L10A [Arabidopsis thaliana]<br>gb AAM15190.1  60S ribosomal protein L10A [Arabidopsis thaliana] gb AAC73045.2  60S ribosomal protein L10A [Arabidopsis thaliana] gb AAL91152.1  60S ribosomal protein L10A [Arabidopsis thaliana] gb AAP13370.1  At2g27530 [Arabidopsis thaliana] sp P59230 R10AB_ARATH 60S ribosomal protein L10a-2                                                                                                                                                                                                                                                                                                                                                                                                                                                                                                                                                                                                                                                                                                                                                                                                                                                                                                                                                                                                                                                                                                                                                                                                                                                                                                                                                                                                                                                                                           | 216   | 2E-82   |
| BM267999              | 3.63E-03        | Mo17<B73=F1         | 1.3                      | 10                  | >ref NP_001031228.1  ubiquitin conjugating enzyme/ubiquitin-like activating enzyme [Arabidopsis thaliana] ref NP_564828.1  ubiquitin conjugating enzyme/ubiquitin-like activating enzyme [Arabidopsis thaliana] gb AAM91500.1  At1g64230/F22C12_17 [Arabidopsis thaliana] gb AAM11574.1  ubiquitin conjugating enzyme UBC9A [Arabidopsis thaliana] gb AAK60309.1  At1g64230/F22C12_17 [Arabidopsis thaliana] gb AAY44867.1  ubiquitinating enzyme [Arabidopsis thaliana]<br>>ref XP_464900.1  ubiquitin-conjugating enzyme OsUBC5b [Oryza sativa (japonica cultivar-group)] dbj BAD20047.1  ubiquitin-conjugating enzyme OsUBC5b [Oryza sativa (japonica cultivar-group)] dbj BAB89355.1  ubiquitin-conjugating enzyme OsUBC5b [Oryza sativa (japonica cultivar-group)]<br>>gb AAA64427.1  ubiquitin conjugating enzyme<br>>gb AAR83891.1  ubiquitin-conjugating enzyme 8 [Capsicum annuum]gb ABB54487.1  ubiquitin-conjugating enzyme E2 [Capsicum annuum]<br>>ref NP_568788.1  UBC10; ubiquitin conjugating enzyme/ubiquitin-like activating enzyme [Arabidopsis thaliana] ref NP_851181.1  UBC10; ubiquitin conjugating enzyme/ubiquitin-like activating enzyme [Arabidopsis thaliana] emb CAA78715.1  ubiquitin conjugating enzyme [Arabidopsis thaliana] gb AAM44985.1  putative E2, ubiquitin-conjugating enzyme UBC10 [Arabidopsis thaliana] gb AAG41454.1  putative E2, ubiquitin-conjugating enzyme UBC10 [Arabidopsis thaliana] gb AAM91074.1  AT5g53300/K19E1_10 [Arabidopsis thaliana] gb AAL57693.1  AT5g53300/K19E1_10 [Arabidopsis thaliana] gb AAK62621.1  AT5g53300/K19E1_10 [Arabidopsis thaliana] gb AAG40357.1  AT5g53300 [Arabidopsis thaliana] gb AAG40069.1  AT5g53300 [Arabidopsis thaliana] dbj BAB09792.1  ubiquitin-conjugating enzyme E2-17 kD 10 (ubiquitin-protein ligase 10) (ubiquitin carrier protein 10) [Arabidopsis thaliana] gb AAY44850.1  ubiquitinating enzyme [Arabidopsis thaliana] sp P35133 UBC10_ARATH Ubiquitin-conjugating enzyme E2-17 kDa 10/12 (Ubiquitin-protein ligase 10/12) (Ubiquitin carrier protein 10/12) gb AAA32895.1  ubiquitin conjugating enzyme | 148   | 1E-71   |
| AI692097              | 3.65E-03        | Mo17<B73=F1         | 2.01                     | 10                  | >emb CAA56313.1  putative pp70 ribosomal protein S6 kinase [Avena sativa]<br>>ref XP_479548.1  putative S6 ribosomal protein kinase [Oryza sativa (japonica cultivar-group)] dbj BAC80008.1  putative S6 ribosomal protein kinase [Oryza sativa (japonica cultivar-group)]<br>>emb CAB89082.1  S6 ribosomal protein kinase [Asparagus officinalis]<br>>gb AAQ93804.1  ribosomal protein S6 kinase [Zea mays]<br>>ref NP_850543.1  ATPK19; kinase [Arabidopsis thaliana]ref NP_187484.1  ATPK19; kinase [Arabidopsis thaliana] gb AAK17162.1  putative ribosomal-protein S6 kinase (ATPK19) [Arabidopsis thaliana] gb AAG51345.1  putative ribosomal-protein S6 kinase (ATPK19); 61330-59548 [Arabidopsis thaliana] sp Q39030 KPK19_ARATH Serine/threonine-protein kinase ATPK19 (Ribosomal-protein S6 kinase homolog)                                                                                                                                                                                                                                                                                                                                                                                                                                                                                                                                                                                                                                                                                                                                                                                                                                                                                                                                                                                                                                                                                                                                                                                                                                                                                           | 480   | 2E-52   |
| AI734703              | 3.67E-03        | Mo17<B73=F1         | 1.43                     | 10                  | >dbj BAD81915.1  putative geranylgeranylated protein NTGP1 [Oryza sativa (japonica cultivar-group)]<br>>gb AAT37501.1  putative SNARE protein [Hevea brasiliensis]<br>>dbj BAD87240.1  putative NTGP1 [Oryza sativa (japonica cultivar-group)]<br>>gb AAQ84317.1  fiber NTGP1-related protein [Gossypium barbadense]<br>>ref NP_200614.1  YKT61 [Arabidopsis thaliana]gb AAM91499.1  AT5g58060/k21119_40 [Arabidopsis thaliana] gb AAK60295.1  AT5g58060/k21119_40 [Arabidopsis thaliana] gb AAG40392.1  AT5g58060 [Arabidopsis thaliana] dbj BAB10997.1  ATGP1 [Arabidopsis thaliana] sp Q9ZRD6 YKT61_ARATH VAMP-like protein YKT61 (AtYKT61) (Geranylgeranylated protein 1) (AtGP1) gb AAD00112.1  ATGP1 [Arabidopsis thaliana]                                                                                                                                                                                                                                                                                                                                                                                                                                                                                                                                                                                                                                                                                                                                                                                                                                                                                                                                                                                                                                                                                                                                                                                                                                                                                                                                                                               | 471   | 2E-35   |
| DV621106              | 3.68E-03        | B73<F1=Mo17         | 1.42                     | 3                   | >ref XP_464257.1  dentin sialophosphoprotein precursor-like [Oryza sativa (japonica cultivar-group)] dbj BAD25712.1  dentin sialophosphoprotein precursor-like [Oryza sativa (japonica cultivar-group)] dbj BAD26250.1  dentin sialophosphoprotein precursor-like [Oryza sativa (japonica cultivar-group)]<br>>ref NP_909810.1  dentin sialophosphoprotein precursor-like protein [Oryza sativa (japonica cultivar-group)] gb AAM19018.1  hypothetical protein [Oryza sativa (japonica cultivar-group)] gb AAN65039.1  dentin sialophosphoprotein precursor-like protein [Oryza sativa (japonica cultivar-group)]<br>>gb AAM13918.1  unknown protein [Arabidopsis thaliana]<br>>ref NP_172151.2  unknown protein [Arabidopsis thaliana]<br>>ref NP_001031449.1  unknown protein [Arabidopsis thaliana]ref NP_180640.2  unknown protein [Arabidopsis thaliana] gb AAU45205.1  At2g30820 [Arabidopsis thaliana] gb AAS49046.1  At2g30820 [Arabidopsis thaliana]                                                                                                                                                                                                                                                                                                                                                                                                                                                                                                                                                                                                                                                                                                                                                                                                                                                                                                                                                                                                                                                                                                                                                   | 389   | 2E-32   |
| BM079958              | 3.68E-03        | Mo17<B73=F1         | 3.67                     | 10                  | >gb AAS88577.1  terpene synthase 7 [Zea mays]<br>>ref XP_471998.1  OSJNBb0085H11.9 [Oryza sativa (japonica cultivar-group)]emb CAE03960.2  OSJNBb0085H11.9 [Oryza sativa (japonica cultivar-group)]<br>>ref XP_471978.1  OSJNBb0062B06.7 [Oryza sativa (japonica cultivar-group)]emb CAE04049.2  OSJNBb0062B06.7 [Oryza sativa (japonica cultivar-group)]<br>>ref XP_471996.1  OSJNBb0085H11.7 [Oryza sativa (japonica cultivar-group)]emb CAE03958.2  OSJNBb0085H11.7 [Oryza sativa (japonica cultivar-group)]<br>>ref XP_471997.1  OSJNBb0085H11.8 [Oryza sativa (japonica cultivar-group)]emb CAE03959.2  OSJNBb0085H11.8 [Oryza sativa (japonica cultivar-group)]                                                                                                                                                                                                                                                                                                                                                                                                                                                                                                                                                                                                                                                                                                                                                                                                                                                                                                                                                                                                                                                                                                                                                                                                                                                                                                                                                                                                                                           | 421   | 8E-14   |
| CD661986              | 3.69E-03        | B73=Mo17<F1         | 1.59                     | 12                  | >gb AAA87042.1  putative 32.7 kDa jasmonate-induced protein [Hordeum vulgare]gb AAB72097.1  32 kDa protein [Hordeum vulgare]<br>>gb AAB72098.1  32 kDa protein [Hordeum vulgare]<br>>gb AAA87041.1  putative 32.6 kDa jasmonate-induced protein [Hordeum vulgare]gb AAB72096.1  32 kDa protein [Hordeum vulgare]<br>>gb ABA96667.1  jacalin homolog [Oryza sativa (japonica cultivar-group)]<br>>gb ABA96669.1  jakalin homolog [Oryza sativa (japonica cultivar-group)]                                                                                                                                                                                                                                                                                                                                                                                                                                                                                                                                                                                                                                                                                                                                                                                                                                                                                                                                                                                                                                                                                                                                                                                                                                                                                                                                                                                                                                                                                                                                                                                                                                        | 304   | 2E-19   |

**Table 4. Microarray analysis results, mode of gene action classification, and BLAST annotation for the 1,367 ESTs identified as differentially expressed among genotypes (15% FDR)**

| GenBank accession no. | Overall P value | Significant pattern | Fold change <sup>†</sup> | Sector <sup>‡</sup> | BLAST annotation*                                                                                                                                                                                                                                                                                                                                                                                                                                                                                            | Score | E value |
|-----------------------|-----------------|---------------------|--------------------------|---------------------|--------------------------------------------------------------------------------------------------------------------------------------------------------------------------------------------------------------------------------------------------------------------------------------------------------------------------------------------------------------------------------------------------------------------------------------------------------------------------------------------------------------|-------|---------|
| CD651745              | 3.70E-03        | B73=F1<Mo17         | 1.32                     | 4                   | >tpg DAA05104.1  TPA: TPA exp: WRKY transcription factor 39 [Oryza sativa (indicacultivar-group)]                                                                                                                                                                                                                                                                                                                                                                                                            | 361   | 1E-17   |
|                       |                 |                     |                          |                     | >dbj BAD27888.1  putative WRKY transcription factor [Oryza sativa (japonicacultivar-group)]                                                                                                                                                                                                                                                                                                                                                                                                                  | 361   | 1E-17   |
|                       |                 |                     |                          |                     | >ref NP_568777.1  WRKY27; transcription factor [Arabidopsis thaliana]gb AAL13041.1  WRKY transcription factor 27 [Arabidopsis thaliana] dbj BAB10431.1  unnamed protein product [Arabidopsis thaliana] sp Q9FLX8 WRK27 ARATH Probable WRKY transcription factor 27 (WRKY DNA-binding protein 27)                                                                                                                                                                                                             | 348   | 1E-7    |
|                       |                 |                     |                          |                     | >gb AAO23325.1  WRKY transcription factor 22 [Capsella rubella]gb AAO23324.1  WRKY transcription factor 22 [Capsella rubella]                                                                                                                                                                                                                                                                                                                                                                                | 302   | 6E-7    |
|                       |                 |                     |                          |                     | >ref NP_192034.1  WRKY22; transcription factor [Arabidopsis thaliana]emb CAB80934.1  putative DNA-binding protein [Arabidopsis thaliana] gb AAL85135.1  putative DNA-binding protein [Arabidopsis thaliana] gb AAK76583.1  putative DNA-binding protein [Arabidopsis thaliana] gb AAL35285.1  WRKY transcription factor 22 [Arabidopsis thaliana] gb AAB61016.1  similar to SPF1 DNA-binding protein [Arabidopsis thaliana] sp O04609 WRK22_ARATH WRKY transcription factor 22 (WRKY DNA-binding protein 22) | 298   | 6E-7    |
| CB334689              | 3.72E-03        | F1=Mo17<B73         | 1.37                     | 9                   | >ref XP_464007.1  putative ATP synthase [Oryza sativa (japonica cultivar-group)]dbj BAD07747.1  putative ATP synthase [Oryza sativa (japonica cultivar-group)]                                                                                                                                                                                                                                                                                                                                               | 240   | 4E-74   |
|                       |                 |                     |                          |                     | >gb AAT36616.1  mitochondrial ATP synthase precursor [Triticum aestivum]                                                                                                                                                                                                                                                                                                                                                                                                                                     | 238   | 9E-74   |
|                       |                 |                     |                          |                     | >emb CAA52349.1  putative ATP synthase subunit [Glycine max]                                                                                                                                                                                                                                                                                                                                                                                                                                                 | 179   | 9E-50   |
|                       |                 |                     |                          |                     | >ref NP_179778.1  unknown protein [Arabidopsis thaliana]gb AAL85043.1  putative ATP synthase [Arabidopsis thaliana] gb AAK76694.1  putative ATP synthase [Arabidopsis thaliana] gb AAD20405.1  putative ATP synthase [Arabidopsis thaliana] sp Q9SJ12 ATP7_ARATH Probable ATP synthase 24 kDa subunit, mitochondrial precursor                                                                                                                                                                               | 240   | 1E-48   |
|                       |                 |                     |                          |                     | >ref NP_850018.1  unknown protein [Arabidopsis thaliana]                                                                                                                                                                                                                                                                                                                                                                                                                                                     | 220   | 1E-48   |
| DV549348              | 3.73E-03        | F1=Mo17<B73         | 1.33                     | 9                   | >ref NP_921446.1  unknown protein [Oryza sativa (japonica cultivar-group)]                                                                                                                                                                                                                                                                                                                                                                                                                                   | 713   | 1E-26   |
|                       |                 |                     |                          |                     | >gb AAP80664.1  S28 ribosomal protein [Triticum aestivum]                                                                                                                                                                                                                                                                                                                                                                                                                                                    | 86    | 1E-20   |
|                       |                 |                     |                          |                     | >emb CAA04565.1  rpS28 [Hordeum vulgare subsp. vulgare]                                                                                                                                                                                                                                                                                                                                                                                                                                                      | 65    | 7E-20   |
|                       |                 |                     |                          |                     | >emb CAA57636.1  small subunit ribosomal protein S28 [Zea mays]sp P46302 RS28 MAIZE 40S ribosomal protein S28                                                                                                                                                                                                                                                                                                                                                                                                | 65    | 1E-19   |
|                       |                 |                     |                          |                     | >emb CAA10103.1  ribosomal protein S28 [Prunus persica]emb CAA10102.1  ribosomal protein S28 [Prunus persica] emb CAA10101.1  ribosomal protein S28 [Prunus persica]                                                                                                                                                                                                                                                                                                                                         | 65    | 3E-18   |
| CD527497              | 3.74E-03        | Mo17<B73=F1         | 1.29                     | 10                  | ns                                                                                                                                                                                                                                                                                                                                                                                                                                                                                                           |       |         |
| AW585290              | 3.75E-03        | B73=F1<Mo17         | 1.53                     | 5                   | ns                                                                                                                                                                                                                                                                                                                                                                                                                                                                                                           |       |         |
| CB815806              | 3.78E-03        | Mo17<B73=F1         | 1.38                     | 10                  | >ref XP_476772.1  putative root hairless 1 [Oryza sativa (japonica cultivar-group)]dbj BAC83617.1  putative root hairless 1 [Oryza sativa (japonica cultivar-group)]                                                                                                                                                                                                                                                                                                                                         | 367   | 1E-53   |
|                       |                 |                     |                          |                     | >gb AAC69460.1  ROOT HAIRLESS 1 [Arabidopsis thaliana]                                                                                                                                                                                                                                                                                                                                                                                                                                                       | 355   | 1E-21   |
|                       |                 |                     |                          |                     | >ref NP_564526.1  RHL1 (ROOT HAIRLESS 1) [Arabidopsis thaliana]gb AAM91453.1  At1g48380/F11A17_7 [Arabidopsis thaliana] gb AAL15337.1  At1g48380/F11A17_7 [Arabidopsis thaliana] gb AAD49759.1  Identical to root hairless 1 (RHL1) from Arabidopsis thaliana gb Z29767. EST gb AI995014 comes from this gene gb AAC23500.1  ROOT HAIRLESS 1 [Arabidopsis thaliana]                                                                                                                                          | 355   | 1E-21   |
|                       |                 |                     |                          |                     | >ref NP_915654.1  P0677H08.7 [Oryza sativa (japonica cultivar-group)]dbj BAB89792.1  membrane protein COV-like [Oryza sativa (japonica cultivar-group)]                                                                                                                                                                                                                                                                                                                                                      | 259   | 1E-56   |
|                       |                 |                     |                          |                     | >gb AAV59306.1  unknown protein [Oryza sativa (japonica cultivar-group)]ref XP_475304.1  unknown protein [Oryza sativa (japonica cultivar-group)]                                                                                                                                                                                                                                                                                                                                                            | 260   | 2E-51   |
| BG873845              | 3.78E-03        | Mo17<B73=F1         | 1.49                     | 10                  | >gb AAM64375.1  unknown [Arabidopsis thaliana]                                                                                                                                                                                                                                                                                                                                                                                                                                                               | 261   | 4E-44   |
|                       |                 |                     |                          |                     | >ref NP_564483.1  LCV2 [Arabidopsis thaliana]gb AAG50825.1  unknown protein [Arabidopsis thaliana] dbj BAD44523.1  unknown protein [Arabidopsis thaliana] dbj BAD44455.1  unknown protein [Arabidopsis thaliana]                                                                                                                                                                                                                                                                                             | 261   | 4E-44   |
|                       |                 |                     |                          |                     | >ref NP_565465.1  LCV1 [Arabidopsis thaliana]gb AAM91311.1  unknown protein [Arabidopsis thaliana] gb AAD24400.2  expressed protein [Arabidopsis thaliana] gb AAL62439.1  unknown protein [Arabidopsis thaliana] gb AAM61503.1  unknown [Arabidopsis thaliana]                                                                                                                                                                                                                                               | 256   | 1E-40   |
|                       |                 |                     |                          |                     | >dbj BAD35914.1  tubulin-specific chaperone C-like [Oryza sativa (japonicacultivar-group)] dbj BAD35569.1  tubulin-specific chaperone C-like [Oryza sativa (japonica cultivar-group)]                                                                                                                                                                                                                                                                                                                        | 581   | 2E-35   |
|                       |                 |                     |                          |                     | >ref XP_464449.1  tubulin-specific chaperone C-like protein [Oryza sativa (japonicacultivar-group)] ref XP_506744.1  PREDICTED OJ1225_F07.5-1 gene product [Oryza sativa (japonica cultivar-group)] dbj BAD25242.1  tubulin-specific chaperone C-like protein [Oryza sativa (japonica cultivar-group)]                                                                                                                                                                                                       | 579   | 4E-35   |
| BM338943              | 3.80E-03        | Mo17<B73=F1         | 1.51                     | 10                  | >ref NP_973669.1  unknown protein [Arabidopsis thaliana]gb AAU95425.1  At2g42230 [Arabidopsis thaliana] gb AAU05480.1  At2g42230 [Arabidopsis thaliana]                                                                                                                                                                                                                                                                                                                                                      | 568   | 5E-28   |
|                       |                 |                     |                          |                     | >ref NP_567059.1  unknown protein [Arabidopsis thaliana]gb AAL36073.1  AT3g57890/T10K17_100 [Arabidopsis thaliana] gb AAK96632.1  AT3g57890/T10K17_100 [Arabidopsis thaliana]                                                                                                                                                                                                                                                                                                                                | 573   | 7E-28   |
|                       |                 |                     |                          |                     | >emb CAB67617.1  putative protein [Arabidopsis thaliana]                                                                                                                                                                                                                                                                                                                                                                                                                                                     | 570   | 2E-23   |
|                       |                 |                     |                          |                     | >sp Q41785 TBB8 MAIZE Tubulin beta-8 chain (Beta-8 tubulin)gb AAA19709.1  beta-8 tubulin                                                                                                                                                                                                                                                                                                                                                                                                                     | 445   | 1E-88   |
|                       |                 |                     |                          |                     | >ref NP_912596.1  tubulin beta-4 chain [Oryza sativa (japonica cultivar-group)]dbj BAB64211.1  putative beta-tubulin 4 [Oryza sativa (japonica cultivar-group)] sp Q43594 TBB1 ORYSA Tubulin beta-1 chain (Beta-1 tubulin) dbj BAB39951.1  putative tubulin beta-4 chain [Oryza sativa (japonica cultivar-group)]                                                                                                                                                                                            | 447   | 1E-88   |
| CB833986              | 3.84E-03        | B73<F1=Mo17         | 1.42                     | 3                   | >emb CAA52720.1  beta-5 tubulin [Zea mays]sp Q43697 TBB5 MAIZE Tubulin beta-5 chain (Beta-5 tubulin)                                                                                                                                                                                                                                                                                                                                                                                                         | 445   | 1E-88   |
|                       |                 |                     |                          |                     | >sp Q9ZRA8 TBB5 WHEAT Tubulin beta-5 chain (Beta-5 tubulin)gb AAD10492.1  beta-tubulin 5 [Triticum aestivum]                                                                                                                                                                                                                                                                                                                                                                                                 | 447   | 1E-88   |
|                       |                 |                     |                          |                     | >sp Q9ZPN7 TBB4 ELEIN Tubulin beta-4 chain (Beta-4 tubulin)gb AAD20181.1  beta-tubulin 4 [Eleusine indica]                                                                                                                                                                                                                                                                                                                                                                                                   | 446   | 1E-88   |
|                       |                 |                     |                          |                     | >ref NP_912768.1  unnamed protein product [Oryza sativa (japonica cultivar-group)]dbj BAD06873.1  replication protein A 14kDa [Oryza sativa (japonica cultivar-group)] dbj BAAS84607.1  unknown protein [Oryza sativa (japonica cultivar-group)]                                                                                                                                                                                                                                                             | 106   | 2E-26   |
|                       |                 |                     |                          |                     | >ref NP_567560.2  unknown protein [Arabidopsis thaliana]gb AAS88756.1  At4g18590 [Arabidopsis thaliana] gb AAS76692.1  At4g18590 [Arabidopsis thaliana]                                                                                                                                                                                                                                                                                                                                                      | 106   | 3E-18   |

**Table 4. Microarray analysis results, mode of gene action classification, and BLAST annotation for the 1,367 ESTs identified as differentially expressed among genotypes (15% FDR)**

| GenBank accession no. | Overall P value | Significant pattern | Fold change <sup>†</sup> | Sector <sup>‡</sup> | BLAST annotation*                                                                                                                                                                                                                                                                                                                                                                                                                                                                                                                                                                                                                                                                                                                                                                                                                        | Score | E value |
|-----------------------|-----------------|---------------------|--------------------------|---------------------|------------------------------------------------------------------------------------------------------------------------------------------------------------------------------------------------------------------------------------------------------------------------------------------------------------------------------------------------------------------------------------------------------------------------------------------------------------------------------------------------------------------------------------------------------------------------------------------------------------------------------------------------------------------------------------------------------------------------------------------------------------------------------------------------------------------------------------------|-------|---------|
| CD568491              | 3.89E-03        | B73<F1=Mo17         | 1.24                     | 3                   | >emb CAB78861.1  pollen-specific protein-like [Arabidopsis thaliana]emb CAA16739.1  pollen-specific protein - like [Arabidopsis thaliana]                                                                                                                                                                                                                                                                                                                                                                                                                                                                                                                                                                                                                                                                                                | 842   | 4E-16   |
|                       |                 |                     |                          |                     | >ref NP_190831.1  unknown protein [Arabidopsis thaliana]emb CAB89224.1  putative protein [Arabidopsis thaliana]                                                                                                                                                                                                                                                                                                                                                                                                                                                                                                                                                                                                                                                                                                                          | 107   | 4E-15   |
|                       |                 |                     |                          |                     | >gb ABA95281.1  U2 snRNP auxiliary factor, large subunit, splicing factor,putative [Oryza sativa (japonica cultivar-group)]                                                                                                                                                                                                                                                                                                                                                                                                                                                                                                                                                                                                                                                                                                              | 613   | 3E-43   |
|                       |                 |                     |                          |                     | >gb AAY84880.1  U2AF large subunit [Triticum aestivum]                                                                                                                                                                                                                                                                                                                                                                                                                                                                                                                                                                                                                                                                                                                                                                                   | 543   | 2E-42   |
|                       |                 |                     |                          |                     | >gb AAM98156.1  putative U2 snRNP auxiliary factor [Arabidopsis thaliana]                                                                                                                                                                                                                                                                                                                                                                                                                                                                                                                                                                                                                                                                                                                                                                | 589   | 2E-33   |
| CB605071              | 3.90E-03        | Mo17<B73=F1         | 1.61                     | 10                  | >gb AAG51641.1  putative U2 snRNP auxiliary factor; 19096-22891 [Arabidopsisthaliana]                                                                                                                                                                                                                                                                                                                                                                                                                                                                                                                                                                                                                                                                                                                                                    | 568   | 2E-33   |
|                       |                 |                     |                          |                     | >ref NP_176287.3  RNA binding / nucleic acid binding [Arabidopsis thaliana]                                                                                                                                                                                                                                                                                                                                                                                                                                                                                                                                                                                                                                                                                                                                                              | 589   | 2E-33   |
|                       |                 |                     |                          |                     | >dbj BAD19416.1  unknown protein [Oryza sativa (japonica cultivar-group)]dbj BAD36049.1  unknown protein [Oryza sativa (japonica cultivar-group)]                                                                                                                                                                                                                                                                                                                                                                                                                                                                                                                                                                                                                                                                                        | 122   | 1E-11   |
|                       |                 |                     |                          |                     | >ref XP_465375.1  putative diaminopimelate decarboxylase [Oryza sativa (japonicacultivar-group)] dbj BAD16980.1  putative diaminopimelate decarboxylase [Oryza sativa (japonica cultivar-group)]                                                                                                                                                                                                                                                                                                                                                                                                                                                                                                                                                                                                                                         | 490   | 9E-42   |
|                       |                 |                     |                          |                     | >emb CAB87661.1  diaminopimelate decarboxylase-like protein [Arabidopsis thaliana]                                                                                                                                                                                                                                                                                                                                                                                                                                                                                                                                                                                                                                                                                                                                                       | 496   | 6E-40   |
| CB605414              | 3.92E-03        | Mo17<B73=F1         | 1.48                     | 10                  | >emb CAB62550.1  diaminopimelate decarboxylase [Arabidopsis thaliana]                                                                                                                                                                                                                                                                                                                                                                                                                                                                                                                                                                                                                                                                                                                                                                    | 145   | 6E-40   |
|                       |                 |                     |                          |                     | >ref NP_568252.1  diaminopimelate decarboxylase [Arabidopsis thaliana]gb AAM98306.1  At5g11880/F14F18_50 [Arabidopsis thaliana] gb AAK83608.1  AT5g11880/F14F18_50 [Arabidopsis thaliana]                                                                                                                                                                                                                                                                                                                                                                                                                                                                                                                                                                                                                                                | 489   | 6E-40   |
|                       |                 |                     |                          |                     | >ref NP_188056.1  diaminopimelate decarboxylase [Arabidopsis thaliana]gb AAM67531.1  putative diaminopimelate decarboxylase [Arabidopsis thaliana] gb AAK92758.1  putative diaminopimelate decarboxylase [Arabidopsis thaliana] gb AAL55653.1  diaminopimelate decarboxylase [Arabidopsis thaliana] gb AAM65955.1  putative diaminopimelate decarboxylase [Arabidopsis thaliana]                                                                                                                                                                                                                                                                                                                                                                                                                                                         | 484   | 6E-40   |
|                       |                 |                     |                          |                     | >gb AAO72599.1  putative 2-dehydro-3-deoxyphosphoactonate aldolase [Oryza sativa(japonica cultivar-group)]                                                                                                                                                                                                                                                                                                                                                                                                                                                                                                                                                                                                                                                                                                                               | 340   | e-105   |
|                       |                 |                     |                          |                     | >emb CAA74645.1  3-deoxy-D-manno-2-octulosonate-8-phosphate synthase [Pisum sativum]emb CAA74644.1  3-deoxy-D-manno-2-octulosonate-8-phosphate synthase [Pisum sativum] sp O50044 KDSA_PEA 2-dehydro-3-deoxyphosphoactonate aldolase (Phospho-2-dehydro-3-deoxyoctonate aldolase) (3-deoxy-D-manno-octulosonic acid 8-phosphate synthetase) (KDO-8-phosphate synthetase) (KDO 8-P synthase) (KDOPS)                                                                                                                                                                                                                                                                                                                                                                                                                                      | 290   | e-101   |
| DV491329              | 3.94E-03        | Mo17<B73=F1         | 1.34                     | 10                  | >ref NP_974176.1  KDSA; 3-deoxy-8-phosphoactonate synthase [Arabidopsis thaliana]ref NP_001031300.1  KDSA; 3-deoxy-8-phosphoactonate synthase [Arabidopsis thaliana] ref NP_178068.1  KDSA; 3-deoxy-8-phosphoactonate synthase [Arabidopsis thaliana] ref NP_849906.1  KDSA; 3-deoxy-8-phosphoactonate synthase [Arabidopsis thaliana] gb AAK50087.1  At1g79500/T8K14_8 [Arabidopsis thaliana] gb AAD30227.1  Strong similarity to gb Y14272.3-deoxy-D-manno-2-octulosonate-8-phosphate synthase from Pisum sativum. ESTs gb AA067485 and gb AI100551 come from this gene. [Arabidopsis thaliana] sp Q9AV97 KDSA_ARATH 2-dehydro-3-deoxyphosphoactonate aldolase (Phospho-2-dehydro-3-deoxyoctonate aldolase) (3-deoxy-D-manno-octulosonic acid 8-phosphate synthetase) (KDO-8-phosphate synthetase) (KDO 8-P synthase) (KDOPS) (AtkdsA) | 290   | 3E-98   |
|                       |                 |                     |                          |                     | >gb AAM47465.1  AT5g09730/F17114_80 [Arabidopsis thaliana]                                                                                                                                                                                                                                                                                                                                                                                                                                                                                                                                                                                                                                                                                                                                                                               | 290   | 3E-98   |
|                       |                 |                     |                          |                     | >dbj BAB41014.1  2-dehydro-3-deoxyphosphoactonate aldolase [Arabidopsis thaliana]                                                                                                                                                                                                                                                                                                                                                                                                                                                                                                                                                                                                                                                                                                                                                        | 290   | 1E-97   |
|                       |                 |                     |                          |                     | >dbj BAD53672.1  protodermal factor-like [Oryza sativa (japonica cultivar-group)]                                                                                                                                                                                                                                                                                                                                                                                                                                                                                                                                                                                                                                                                                                                                                        | 186   | 2E-9    |
|                       |                 |                     |                          |                     | >ref XP_469890.1  putative aurora-related kinase [Oryza sativa (japonicacultivar-group)] gb AAP50960.1  putative aurora-related kinase [Oryza sativa (japonica cultivar-group)] dbj BAE00023.1  Aurora kinase [Oryza sativa (japonica cultivar-group)]                                                                                                                                                                                                                                                                                                                                                                                                                                                                                                                                                                                   | 279   | 9E-61   |
| CD650941              | 3.97E-03        | B73<F1=Mo17         | 1.49                     | 3                   | >ref NP_182073.1  ATP binding / protein kinase/ protein serine/threonine kinase/protein-tyrosine kinase [Arabidopsis thaliana] emb CAH69534.1  aurora-like kinase 3 [Arabidopsis thaliana] dbj BAE00021.1  Aurora kinase [Arabidopsis thaliana] gb AAC06151.1  putative protein kinase [Arabidopsis thaliana] gb AAL69469.1  At2g45490/F17K2.2 [Arabidopsis thaliana]                                                                                                                                                                                                                                                                                                                                                                                                                                                                    | 288   | 3E-47   |
|                       |                 |                     |                          |                     | >ref NP_195009.1  kinase/ protein serine/threonine kinase [Arabidopsis thaliana]emb CAB80000.1  putative serine/threonine protein kinase [Arabidopsis thaliana] emb CAH69532.1  aurora-like kinase 1 [Arabidopsis thaliana] dbj BAD95178.1  putative serine/threonine protein kinase [Arabidopsis thaliana] dbj BAE00019.1  Aurora kinase [Arabidopsis thaliana]                                                                                                                                                                                                                                                                                                                                                                                                                                                                         | 294   | 9E-45   |
|                       |                 |                     |                          |                     | >gb AAM64506.1  putative serine/threonine protein kinase [Arabidopsis thaliana]                                                                                                                                                                                                                                                                                                                                                                                                                                                                                                                                                                                                                                                                                                                                                          | 294   | 9E-45   |
|                       |                 |                     |                          |                     | >emb CAH69533.1  aurora-like kinase 2 [Arabidopsis thaliana]gb AAR07517.1  At2g25880 [Arabidopsis thaliana] dbj BAE00020.1  Aurora kinase [Arabidopsis thaliana] gb AAC42257.1  putative protein kinase [Arabidopsis thaliana]                                                                                                                                                                                                                                                                                                                                                                                                                                                                                                                                                                                                           | 282   | 1E-43   |
|                       |                 |                     |                          |                     | >ref XP_483414.1  putative ribosomal protein L32 [Oryza sativa (japonicacultivar-group)] dbj BAC75414.1  putative ribosomal protein L32 [Oryza sativa (japonica cultivar-group)]                                                                                                                                                                                                                                                                                                                                                                                                                                                                                                                                                                                                                                                         | 133   | 4E-56   |
| CB816779              | 3.97E-03        | Mo17<B73=F1         | 1.34                     | 10                  | >emb CAH55765.1  ribosomal L32 [Oryza sativa (indica cultivar-group)]                                                                                                                                                                                                                                                                                                                                                                                                                                                                                                                                                                                                                                                                                                                                                                    | 133   | 3E-53   |
|                       |                 |                     |                          |                     | >gb AAZ32896.1  ribosomal protein L32 [Medicago sativa]                                                                                                                                                                                                                                                                                                                                                                                                                                                                                                                                                                                                                                                                                                                                                                                  | 133   | 5E-51   |
|                       |                 |                     |                          |                     | >gb AAR83884.1  ly200 protein [Capsicum annuum]                                                                                                                                                                                                                                                                                                                                                                                                                                                                                                                                                                                                                                                                                                                                                                                          | 133   | 2E-50   |
|                       |                 |                     |                          |                     | >gb ABB02639.1  ly200-like protein [Solanum tuberosum]gb ABA40471.1  ly200-like protein [Solanum tuberosum]                                                                                                                                                                                                                                                                                                                                                                                                                                                                                                                                                                                                                                                                                                                              | 133   | 6E-50   |
|                       |                 |                     |                          |                     | >ref XP_470471.1  putative chloroplastic RNA-binding protein, with alternative splicing isoforms [Oryza sativa (japonica cultivar-group)] gb AAS01974.1  putative chloroplastic RNA-binding protein, with alternative splicing isoforms [Oryza sativa (japonica cultivar-group)]                                                                                                                                                                                                                                                                                                                                                                                                                                                                                                                                                         | 884   | 8E-76   |
| CD569015              | 3.97E-03        | F1=Mo17<B73         | 6.71                     | 9                   | >ref NP_172989.1  unknown protein [Arabidopsis thaliana]gb AAG54007.1  unknown protein [Arabidopsis thaliana] dbj BAC43292.1  unknown protein [Arabidopsis thaliana] gb AAD39665.1  ESTs gb T22508, gb H36196 and gb AI100134 come from this gene. [Arabidopsis thaliana]                                                                                                                                                                                                                                                                                                                                                                                                                                                                                                                                                                | 147   | 8E-65   |
|                       |                 |                     |                          |                     | >emb CAG14986.1  hypothetical protein [Cicer arietinum]                                                                                                                                                                                                                                                                                                                                                                                                                                                                                                                                                                                                                                                                                                                                                                                  | 139   | 4E-63   |
|                       |                 |                     |                          |                     | >gb AAL16980.1  15kD beta zein [Zea mays]                                                                                                                                                                                                                                                                                                                                                                                                                                                                                                                                                                                                                                                                                                                                                                                                | 178   | 8E-44   |
| BM337640              | 4.00E-03        | F1<B73=Mo17         | 5.16                     | 7                   |                                                                                                                                                                                                                                                                                                                                                                                                                                                                                                                                                                                                                                                                                                                                                                                                                                          |       |         |

**Table 4. Microarray analysis results, mode of gene action classification, and BLAST annotation for the 1,367 ESTs identified as differentially expressed among genotypes (15% FDR)**

| GenBank accession no. | Overall P value | Significant pattern | Fold change <sup>†</sup> | Sector <sup>‡</sup> | BLAST annotation*                                                                                                                                                                                                                                                                                                                                                                                                                                                                                                       | Score | E value |
|-----------------------|-----------------|---------------------|--------------------------|---------------------|-------------------------------------------------------------------------------------------------------------------------------------------------------------------------------------------------------------------------------------------------------------------------------------------------------------------------------------------------------------------------------------------------------------------------------------------------------------------------------------------------------------------------|-------|---------|
|                       |                 |                     |                          |                     | >gb/AAA33543.1  zein protein                                                                                                                                                                                                                                                                                                                                                                                                                                                                                            | 180   | 5E-41   |
|                       |                 |                     |                          |                     | >gb/AAA33522.1  zein protein precursor                                                                                                                                                                                                                                                                                                                                                                                                                                                                                  | 180   | 5E-41   |
|                       |                 |                     |                          |                     | >sp/P06673 ZEB1 MAIZE Zein-beta precursor (16 kDa) (Zein 2) (Clone 15A3)gb/AAA33521.1  15 kDa zein protein                                                                                                                                                                                                                                                                                                                                                                                                              | 180   | 1E-40   |
|                       |                 |                     |                          |                     | >emb/CAG30668.1  beta-kafirin [Sorghum bicolor]                                                                                                                                                                                                                                                                                                                                                                                                                                                                         | 191   | 3E-16   |
| CB381316              | 4.01E-03        | Mo17<B73=F1         | 1.58                     | 10                  | >dbj/BAD81138.1  unc-84 homolog B-like [Oryza sativa (japonica cultivar-group)]                                                                                                                                                                                                                                                                                                                                                                                                                                         | 455   | 2E-48   |
|                       |                 |                     |                          |                     | >gb/AAV67831.1  unknown protein [Oryza sativa (japonica cultivar-group)]ref XP_476245.1  unknown protein [Oryza sativa (japonica cultivar-group)]                                                                                                                                                                                                                                                                                                                                                                       | 453   | 4E-36   |
|                       |                 |                     |                          |                     | gb/AAV43967.1  unknown protein [Oryza sativa (japonica cultivar-group)] dbj BAC78599.1  hypothetical protein [Oryza sativa (japonica cultivar-group)]                                                                                                                                                                                                                                                                                                                                                                   |       |         |
|                       |                 |                     |                          |                     | >ref NP_566380.2  unknown protein [Arabidopsis thaliana]gb AAF19576.1  hypothetical protein [Arabidopsis thaliana] gb AAP04030.1  unknown protein [Arabidopsis thaliana] dbj BAC42710.1  unknown protein [Arabidopsis thaliana]                                                                                                                                                                                                                                                                                         | 455   | 9E-33   |
|                       |                 |                     |                          |                     | >gb AAM65947.1  unknown [Arabidopsis thaliana]                                                                                                                                                                                                                                                                                                                                                                                                                                                                          | 285   | 3E-32   |
|                       |                 |                     |                          |                     | >ref NP_196118.1  unknown protein [Arabidopsis thaliana]gb AAM47476.1  AT5g04990/MUG13_15 [Arabidopsis thaliana] gb AAL08289.1  AT5g04990/MUG13_15 [Arabidopsis thaliana] dbj BAB11521.1  unnamed protein product [Arabidopsis thaliana]                                                                                                                                                                                                                                                                                | 471   | 1E-28   |
| DV551200              | 4.01E-03        | B73<F1=Mo17         | 1.56                     | 2                   | >gb AAX96059.1  dna-directed rna polymerase ii 8.2 kda polypeptide (ec2.7.7.6)(rpb10) (rp10) (abc10) [Oryza sativa (japonica cultivar-group)] gb ABA91866.1  dna-directed rna polymerase ii 8.2 kda polypeptide [Oryza sativa (japonica cultivar-group)]                                                                                                                                                                                                                                                                | 74    | 3E-33   |
|                       |                 |                     |                          |                     | >ref NP_849640.1  DNA-directed RNA polymerase [Arabidopsis thaliana]gb AAM61374.1  RNA polymerase II subunit (hsRBP10), putative [Arabidopsis thaliana] dbj BAC42977.1  putative RNA polymerase II subunit hsRBP10 [Arabidopsis thaliana]                                                                                                                                                                                                                                                                               | 71    | 2E-31   |
|                       |                 |                     |                          |                     | >sp Q39290 RPB10_BRANA DNA-directed RNA polymerase II 8.2 kDa polypeptide (RPB10) (RP10)(ABC10) gb AAA21279.1  RNA polymerase II subunit RPB10 homolog; similar to yeast RNA polymerase II subunit RPB10, Swiss-Prot Accession Number P22139                                                                                                                                                                                                                                                                            | 71    | 3E-31   |
|                       |                 |                     |                          |                     | >ref NP_176363.1  DNA-directed RNA polymerase [Arabidopsis thaliana]gb AAD21426.1  Putative RNA polymerase II subunit Rpb10 [Arabidopsis thaliana] sp Q9SYA6 RPB10 ARATH DNA-directed RNA polymerase II 8.2 kDa polypeptide (RPB10) (RP10) (ABC10)                                                                                                                                                                                                                                                                      | 71    | 3E-30   |
|                       |                 |                     |                          |                     | >ref XP_790633.1  PREDICTED: similar to DNA-directed RNA polymerase II 7.6 kDapolypeptide (RPB10) (RPB7.6) (RPABC5) [Strongylocentrotus purpuratus]                                                                                                                                                                                                                                                                                                                                                                     | 76    | 2E-26   |
|                       |                 |                     |                          |                     | >ref XP_469890.1  putative aurora-related kinase [Oryza sativa (japonica cultivar-group)] gb AAP50960.1  putative aurora-related kinase [Oryza sativa (japonica cultivar-group)] dbj BAE00023.1  Aurora kinase [Oryza sativa (japonica cultivar-group)]                                                                                                                                                                                                                                                                 | 279   | 1E-99   |
| CB411000              | 4.02E-03        | Mo17<B73=F1         | 1.25                     | 11                  | >ref NP_182073.1  ATP binding / protein kinase/ protein serine/threonine kinase/protein-tyrosine kinase [Arabidopsis thaliana] emb CAH69534.1  aurora-like kinase 3 [Arabidopsis thaliana] dbj BAE00021.1  Aurora kinase [Arabidopsis thaliana] gb AAC06151.1  putative protein kinase [Arabidopsis thaliana] gb AAL69469.1  At2g45490/F17K2.2 [Arabidopsis thaliana]                                                                                                                                                   | 288   | 1E-76   |
|                       |                 |                     |                          |                     | >ref NP_195009.1  kinase/ protein serine/threonine kinase [Arabidopsis thaliana]emb CAB80000.1  putative serine/threonine protein kinase [Arabidopsis thaliana] emb CAH69532.1  aurora-like kinase 1 [Arabidopsis thaliana] dbj BAD95178.1  putative serine/threonine protein kinase [Arabidopsis thaliana] dbj BAE00019.1  Aurora kinase [Arabidopsis thaliana]                                                                                                                                                        | 294   | 3E-68   |
|                       |                 |                     |                          |                     | >gb AAM64506.1  putative serine/threonine protein kinase [Arabidopsis thaliana]                                                                                                                                                                                                                                                                                                                                                                                                                                         | 294   | 7E-68   |
|                       |                 |                     |                          |                     | >emb CAH69533.1  aurora-like kinase 2 [Arabidopsis thaliana]gb AAR07517.1  At2g25880 [Arabidopsis thaliana] dbj BAE00020.1  Aurora kinase [Arabidopsis thaliana] gb AAC42257.1  putative protein kinase [Arabidopsis thaliana]                                                                                                                                                                                                                                                                                          | 282   | 2E-67   |
| CB886589              | 4.04E-03        | Mo17<B73=F1         | 1.31                     | 11                  | >emb CAA67225.1  ribosomal protein S21 [Zea mays]sp Q41852 RS21 MAIZE 40S ribosomal protein S21                                                                                                                                                                                                                                                                                                                                                                                                                         | 81    | 4E-38   |
|                       |                 |                     |                          |                     | >emb CAA70852.1  40S ribosomal subunit protein S21 [Zea mays]                                                                                                                                                                                                                                                                                                                                                                                                                                                           | 81    | 6E-37   |
|                       |                 |                     |                          |                     | >dbj BAA02158.1  40S subunit ribosomal protein [Oryza sativa (japonica cultivar-group)] sp P35687 RS21 ORYSA 40S ribosomal protein S21                                                                                                                                                                                                                                                                                                                                                                                  | 82    | 2E-34   |
|                       |                 |                     |                          |                     | >ref XP_469197.1  40S subunit ribosomal protein [Oryza sativa (japonica cultivar-group)] gb AAP44638.1  40S subunit ribosomal protein [Oryza sativa (japonica cultivar-group)]                                                                                                                                                                                                                                                                                                                                          | 82    | 5E-34   |
|                       |                 |                     |                          |                     | >gb AAU89141.1  40S ribosomal protein S21, putative [Oryza sativa (japonica cultivar-group)]                                                                                                                                                                                                                                                                                                                                                                                                                            | 119   | 7E-33   |
| CB331516              | 4.04E-03        | Mo17<B73=F1         | 1.34                     | 10                  | >gb AAR87233.1  hypothetical protein [Oryza sativa (japonica cultivar-group)]gb AAT78768.1  hypothetical protein [Oryza sativa (japonica cultivar-group)]                                                                                                                                                                                                                                                                                                                                                               | 145   | 5E-22   |
|                       |                 |                     |                          |                     | >dbj BAB21526.1  mitochondrial ATP synthase 6 KD subunit [Oryza sativa (japonica cultivar-group)]                                                                                                                                                                                                                                                                                                                                                                                                                       | 58    | 3E-21   |
|                       |                 |                     |                          |                     | >ref NP_680457.1  unknown protein [Arabidopsis thaliana]ref NP_190227.1  unknown protein [Arabidopsis thaliana] emb CAB62034.1  putative protein [Arabidopsis thaliana] gb AAM19926.1  AT3g46430/F18L15_150 [Arabidopsis thaliana] gb AAM10121.1  unknown protein [Arabidopsis thaliana] gb AAL36060.1  AT3g46430/F18L15_150 [Arabidopsis thaliana] gb AAL32914.1  Unknown protein [Arabidopsis thaliana] dbj BAC43026.1  unknown protein [Arabidopsis thaliana] dbj BAC42332.1  unknown protein [Arabidopsis thaliana] | 55    | 3E-20   |
| CB381093              | 4.05E-03        | Mo17<B73=F1         | 1.26                     | 10                  | ns                                                                                                                                                                                                                                                                                                                                                                                                                                                                                                                      |       |         |
| BM074085              | 4.07E-03        | B73<F1=Mo17         | 1.46                     | 3                   | ns                                                                                                                                                                                                                                                                                                                                                                                                                                                                                                                      |       |         |
| CB605200              | 4.08E-03        | Mo17<B73=F1         | 1.37                     | 10                  | >emb CAA63903.1  heat shock protein 17.9 [Pennisetum glaucum]                                                                                                                                                                                                                                                                                                                                                                                                                                                           | 159   | 5E-49   |
|                       |                 |                     |                          |                     | >ref NP_912354.1  putative class I low-molecular-weight heat shock protein [Oryzasativa (japonica cultivar-group)] dbj BAC78583.1  heat shock protein 18 [Oryza sativa (japonica cultivar-group)] gb AAK54445.1  class I low-molecular-weight heat shock protein 17.9 [Oryza sativa] gb AAP06878.1  putative class I low-molecular-weight heat shock protein [Oryza sativa (japonica cultivar-group)]                                                                                                                   | 161   | 4E-48   |
|                       |                 |                     |                          |                     | >ref NP_912359.1  unknown protein [Oryza sativa (japonica cultivar-group)]gb AAP06883.1  unknown protein [Oryza sativa (japonica cultivar-group)]                                                                                                                                                                                                                                                                                                                                                                       | 161   | 2E-46   |
|                       |                 |                     |                          |                     | >ref NP_912358.1  unknown protein [Oryza sativa (japonica cultivar-group)]gb AAP06882.1  unknown protein [Oryza sativa (japonica cultivar-group)]                                                                                                                                                                                                                                                                                                                                                                       |       |         |
|                       |                 |                     |                          |                     | gb AAC78392.1  low molecular mass heat shock protein Oshsp17.3 [Oryza sativa]                                                                                                                                                                                                                                                                                                                                                                                                                                           | 154   | 3E-45   |
|                       |                 |                     |                          |                     | >gb AAM28293.1  class-1 LMW heat shock protein [Ananas comosus]                                                                                                                                                                                                                                                                                                                                                                                                                                                         | 156   | 7E-45   |

**Table 4. Microarray analysis results, mode of gene action classification, and BLAST annotation for the 1,367 ESTs identified as differentially expressed among genotypes (15% FDR)**

| GenBank accession no. | Overall P value | Significant pattern | Fold change <sup>†</sup> | Sector <sup>‡</sup> | BLAST annotation*                                                                                                                                                                                                                                                                                                                                                                                                           | Score | E value |
|-----------------------|-----------------|---------------------|--------------------------|---------------------|-----------------------------------------------------------------------------------------------------------------------------------------------------------------------------------------------------------------------------------------------------------------------------------------------------------------------------------------------------------------------------------------------------------------------------|-------|---------|
| DV489868              | 4.08E-03        | B73=F1<Mo17         | 2.24                     | 4                   | >ref XP_550452.1  putative MYB29 protein [Oryza sativa (japonica cultivar-group)]dbj BAD67706.1  putative MYB29 protein [Oryza sativa (japonica cultivar-group)]                                                                                                                                                                                                                                                            | 298   | 2E-48   |
|                       |                 |                     |                          |                     | >dbj BAD45449.1  MYB29 protein [Oryza sativa (japonica cultivar-group)]                                                                                                                                                                                                                                                                                                                                                     | 166   | 1E-24   |
|                       |                 |                     |                          |                     | >emb CAD44621.1  MYB29 protein [Oryza sativa (japonica cultivar-group)]                                                                                                                                                                                                                                                                                                                                                     | 107   | 2E-24   |
|                       |                 |                     |                          |                     | >gb AAZ20444.1  MYBR5 [Malus x domestica]                                                                                                                                                                                                                                                                                                                                                                                   | 323   | 1E-23   |
|                       |                 |                     |                          |                     | >ref NP_851177.1  DNA binding / transcription factor [Arabidopsis thaliana]emb CAI77451.1  myb transcription factor LHY-CCA1-like2 [Arabidopsis thaliana]gb AAM65227.1  contains similarity to MYB-related DNA-binding protein [Arabidopsis thaliana]                                                                                                                                                                       | 330   | 3E-22   |
| AW076397              | 4.08E-03        | Mo17<B73=F1         | 1.4                      | 10                  | >ref XP_475676.1  unknown protein [Oryza sativa (japonica cultivar-group)]gb AAT44270.1  unknown protein [Oryza sativa (japonica cultivar-group)]                                                                                                                                                                                                                                                                           | 374   | 4E-7    |
|                       |                 |                     |                          |                     | >ref NP_922097.1  hypothetical protein [Oryza sativa (japonica cultivar-group)]gb AAN05005.1  hypothetical protein [Oryza sativa (japonica cultivar-group)]                                                                                                                                                                                                                                                                 | 297   | 4E-6    |
|                       |                 |                     |                          |                     | >gb ABA99826.1  DNA binding protein, putative [Oryza sativa (japonica cultivar-group)]                                                                                                                                                                                                                                                                                                                                      | 407   | 6E-6    |
| DV490225              | 4.11E-03        | Mo17<B73=F1         | 1.25                     | 11                  | >ref XP_468271.1  putative 60S ribosomal protein L39 [Oryza sativa (japonica cultivar-group)] dbj BAD19088.1  putative 60S ribosomal protein L39 [Oryza sativa (japonica cultivar-group)]                                                                                                                                                                                                                                   | 118   | 3E-24   |
|                       |                 |                     |                          |                     | >ref XP_468273.1  60S RIBOSOMAL PROTEIN L39 [Oryza sativa (japonica cultivar-group)]dbj BAD19090.1  60S RIBOSOMAL PROTEIN L39 [Oryza sativa (japonica cultivar-group)] emb CAA64728.1  ribosomal protein L39 [Zea mays] sp P51425 RL39_MAIZE 60S ribosomal protein L39 sp P51426 RL39_ORYSA 60S ribosomal protein L39                                                                                                       | 51    | 1E-23   |
|                       |                 |                     |                          |                     | >dbj BAD72572.1  60S ribosomal protein L39 [Oryza sativa (japonica cultivar-group)]dbj BAD72315.1  60S ribosomal protein L39 [Oryza sativa (japonica cultivar-group)]                                                                                                                                                                                                                                                       | 51    | 4E-23   |
|                       |                 |                     |                          |                     | >gb AAW50988.1  ribosomal protein L39 [Triticum aestivum]                                                                                                                                                                                                                                                                                                                                                                   | 51    | 1E-22   |
|                       |                 |                     |                          |                     | >ref NP_567886.1  structural constituent of ribosome [Arabidopsis thaliana]gb AAQ65098.1  At2g25210 [Arabidopsis thaliana] gb AAL15360.1  AT4g31981 F13D4.162 [Arabidopsis thaliana] gb AAK49624.1  F13D4.162 F13D4.162 [Arabidopsis thaliana] dbj BAC42854.1  unknown protein [Arabidopsis thaliana] sp P51424 RL39_ARATH 60S ribosomal protein L39                                                                        | 51    | 5E-21   |
|                       |                 |                     |                          |                     | >ref NP_915433.1  putative triosephosphate isomerase [Oryza sativa (japonica cultivar-group)] dbj BAB93230.1  putative triosephosphate isomerase [Oryza sativa (japonica cultivar-group)]                                                                                                                                                                                                                                   | 255   | 2E-64   |
|                       |                 |                     |                          |                     | >ref XP_462797.1  putative triosephosphate isomerase [Oryza sativa (japonica cultivar-group)] dbj BAB21144.1  putative triosephosphate isomerase [Oryza sativa (japonica cultivar-group)] dbj BAB43989.1  putative triosephosphate isomerase [Oryza sativa (japonica cultivar-group)] sp P48494 TPIS_ORYSA Triosephosphate isomerase, cytosolic (TIM) (Triose-phosphate isomerase) gb AAA18541.1  triosephosphate isomerase | 253   | 2E-59   |
| BG841520              | 4.14E-03        | Mo17<B73=F1         | 1.7                      | 10                  | >gb AAB81110.1  triosephosphate isomerase 1 [Zea mays]sp P12863 TPIS_MAIZE Triosephosphate isomerase, cytosolic (TIM) (Triose-phosphate isomerase) dbj BAA00009.1  triosephosphate isomerase [Zea mays]                                                                                                                                                                                                                     | 253   | 3E-58   |
|                       |                 |                     |                          |                     | >emb CAA81487.1  triosephosphate isomerase [Secale cereale]sp P46226 TPIS_SECCCE Triosephosphate isomerase, cytosolic (TIM) (Triose-phosphate isomerase) prf 2109226A triosephosphate isomerase                                                                                                                                                                                                                             | 253   | 2E-57   |
|                       |                 |                     |                          |                     | >gb ABA46792.1  triosephosphate isomerase-like protein [Solanum tuberosum]                                                                                                                                                                                                                                                                                                                                                  | 257   | 2E-57   |
|                       |                 |                     |                          |                     | >gb AAO26580.1  glyoxalase II [Brassica juncea]                                                                                                                                                                                                                                                                                                                                                                             | 335   | 1E-20   |
|                       |                 |                     |                          |                     | >gb AAM34273.1  glyoxalase II [Pennisetum glaucum]                                                                                                                                                                                                                                                                                                                                                                          | 336   | 1E-20   |
| DV491652              | 4.15E-03        | Mo17<B73            | 1.52                     | 9                   | >gb AAL14249.1  glyoxalase II [Oryza sativa]dbj BAD33825.1  glyoxalase II [Oryza sativa (japonica cultivar-group)]                                                                                                                                                                                                                                                                                                          | 336   | 1E-20   |
|                       |                 |                     |                          |                     | >ref NP_849599.1  hydroxyacylglutathione hydrolase [Arabidopsis thaliana]gb AAM91233.1  glyoxalase II isozyme, putative [Arabidopsis thaliana]gb AAM20436.1  glyoxalase II isozyme, putative [Arabidopsis thaliana]                                                                                                                                                                                                         | 330   | 2E-15   |
|                       |                 |                     |                          |                     | >ref NP_563760.1  hydroxyacylglutathione hydrolase [Arabidopsis thaliana]gb AAM62972.1  glyoxalase II isozyme, putative [Arabidopsis thaliana]                                                                                                                                                                                                                                                                              | 331   | 2E-15   |
| DV491301              | 4.17E-03        | Mo17<B73=F1         | 1.37                     | 11                  | >ref XP_467761.1  putative ATPase [Oryza sativa (japonica cultivar-group)]dbj BAD16127.1  putative ATPase [Oryza sativa (japonica cultivar-group)]                                                                                                                                                                                                                                                                          | 406   | 5E-41   |
|                       |                 |                     |                          |                     | >gb AAF02825.1  putative ATPase [Arabidopsis thaliana]                                                                                                                                                                                                                                                                                                                                                                      | 386   | 6E-37   |
|                       |                 |                     |                          |                     | >ref NP_187646.2  ATP binding [Arabidopsis thaliana]                                                                                                                                                                                                                                                                                                                                                                        | 411   | 6E-37   |
|                       |                 |                     |                          |                     | >ref NP_200881.2  ATP binding [Arabidopsis thaliana]gb AAV43781.1  At5g60730 [Arabidopsis thaliana] gb AAU84673.1  At5g60730 [Arabidopsis thaliana]                                                                                                                                                                                                                                                                         | 391   | 2E-33   |
|                       |                 |                     |                          |                     | >dbj BAB09846.1  arsenite translocating ATPase-like protein [Arabidopsis thaliana]                                                                                                                                                                                                                                                                                                                                          | 417   | 2E-33   |
| CA829982              | 4.17E-03        | Mo17<B73=F1         | 1.21                     | 10                  | >gb ABA94602.1  ribosomal protein S4 [Oryza sativa (japonica cultivar-group)]                                                                                                                                                                                                                                                                                                                                               | 192   | 5E-17   |
|                       |                 |                     |                          |                     | >gb ABA94601.1  ribosomal protein S4 [Oryza sativa (japonica cultivar-group)]gb ABA94599.1  ribosomal protein S4 [Oryza sativa (japonica cultivar-group)]                                                                                                                                                                                                                                                                   | 195   | 5E-17   |
|                       |                 |                     |                          |                     | >gb ABA94598.1  ribosomal protein S4 [Oryza sativa (japonica cultivar-group)]                                                                                                                                                                                                                                                                                                                                               | 158   | 5E-17   |
|                       |                 |                     |                          |                     | >emb CAG47084.1  40S ribosomal protein S9 [Catharanthus roseus]                                                                                                                                                                                                                                                                                                                                                             | 197   | 1E-15   |
|                       |                 |                     |                          |                     | >ref NP_198801.1  structural constituent of ribosome [Arabidopsis thaliana]gb AAM65655.1  40S ribosomal protein S9-like [Arabidopsis thaliana]dbj BAB10209.1  40S ribosomal protein S9 [Arabidopsis thaliana]                                                                                                                                                                                                               | 197   | 3E-15   |
| CB380716              | 4.19E-03        | F1=Mo17<B73         | 1.28                     | 9                   | >ref XP_480842.1  putative 60S ribosomal protein L7 [Oryza sativa (japonica cultivar-group)] dbj BAD03800.1  putative 60S ribosomal protein L7 [Oryza sativa (japonica cultivar-group)]                                                                                                                                                                                                                                     | 245   | 1E-82   |
|                       |                 |                     |                          |                     | >gb AAW50989.1  ribosomal protein L7 [Triticum aestivum]                                                                                                                                                                                                                                                                                                                                                                    | 244   | 1E-81   |



**Table 4. Microarray analysis results, mode of gene action classification, and BLAST annotation for the 1,367 ESTs identified as differentially expressed among genotypes (15% FDR)**

| GenBank accession no. | Overall P value | Significant pattern | Fold change <sup>‡</sup> | Sector <sup>‡</sup> | BLAST annotation*                                                                                                                                                                                                                                                                                                                                                                                                                                                                                                                                                                                                                                                                | Score | E value |
|-----------------------|-----------------|---------------------|--------------------------|---------------------|----------------------------------------------------------------------------------------------------------------------------------------------------------------------------------------------------------------------------------------------------------------------------------------------------------------------------------------------------------------------------------------------------------------------------------------------------------------------------------------------------------------------------------------------------------------------------------------------------------------------------------------------------------------------------------|-------|---------|
|                       |                 |                     |                          |                     | >ref XP_473801.1  OSJNBb0015N08.13 [Oryza sativa (japonica cultivar-group)]emb CAE03885.2  OSJNBb0015N08.13 [Oryza sativa (japonica cultivar-group)]<br>emb CAE02124.2  OSJNBa0035M09.3 [Oryza sativa (japonica cultivar-group)]                                                                                                                                                                                                                                                                                                                                                                                                                                                 | 250   | 7E-81   |
|                       |                 |                     |                          |                     | >ref NP_974305.1  structural constituent of ribosome / transcription regulator[Arabidopsis thaliana] ref NP_974304.1  structural constituent of ribosome /<br>transcription regulator [Arabidopsis thaliana] ref NP_187967.1  structural constituent of ribosome / transcription regulator [Arabidopsis thaliana] gb AAL76153.1 <br>AT3g13580/K20M4_2 [Arabidopsis thaliana] gb AAL06999.1  AT3g13580/K20M4_2 [Arabidopsis thaliana] gb AAK64004.1  AT3g13580/K20M4_2 [Arabidopsis<br>thaliana] dbj BAB02600.1  60S ribosomal protein L7 [Arabidopsis thaliana] sp Q9LHP1 RL73 ARATH 60S ribosomal protein L7-3                                                                  | 244   | 1E-74   |
|                       |                 |                     |                          |                     | >ref NP_850411.1  structural constituent of ribosome / transcription regulator[Arabidopsis thaliana] gb AAC23430.1  60S ribosomal protein L7 [Arabidopsis<br>thaliana] pir T00692 60S ribosomal protein L7 [imported] - Arabidopsis thaliana                                                                                                                                                                                                                                                                                                                                                                                                                                     | 247   | 2E-74   |
| DV621338              | 4.20E-03        | Mo17<B73=F1         | 1.58                     | 10                  | >dbj BAD81308.1  unknown protein [Oryza sativa (japonica cultivar-group)]dbj BAD81453.1  unknown protein [Oryza sativa (japonica cultivar-group)]<br>>ref NP_920307.1  putative DNA binding protein [Oryza sativa (japonica cultivar-group)] gb AAN09856.1  putative DNA binding protein [Oryza sativa (japonica<br>cultivar-group)] gb AAP52594.1  DNA binding protein, putative [Oryza sativa (japonica cultivar-group)]                                                                                                                                                                                                                                                       | 249   | 6E-23   |
|                       |                 |                     |                          |                     | >gb ABA99343.1  hypothetical protein LOC Os12g35400 [Oryza sativa (japonica cultivar-group)]                                                                                                                                                                                                                                                                                                                                                                                                                                                                                                                                                                                     | 454   | 1E-22   |
|                       |                 |                     |                          |                     | >gb AAT81738.1  hypothetical protein [Oryza sativa (japonica cultivar-group)]                                                                                                                                                                                                                                                                                                                                                                                                                                                                                                                                                                                                    | 780   | 3E-22   |
|                       |                 |                     |                          |                     | >gb AAT81738.1  hypothetical protein [Oryza sativa (japonica cultivar-group)]                                                                                                                                                                                                                                                                                                                                                                                                                                                                                                                                                                                                    | 1500  | 4E-22   |
|                       |                 |                     |                          |                     | >gb AAX95750.1  Eukaryotic protein of unknown function (DUF889), putative [Oryzasativa (japonica cultivar-group)]                                                                                                                                                                                                                                                                                                                                                                                                                                                                                                                                                                | 1806  | 3E-21   |
| CB833704              | 4.23E-03        | Mo17<B73=F1         | 1.36                     | 10                  | >gb AAM08320.1  small Ran-related GTP-binding protein [Triticum aestivum]gb AAL30396.1  small Ras-related GTP-binding protein [Triticum aestivum]<br>>ref XP_475914.1  GTP-binding nuclear protein RAN-B1 [Oryza sativa (japonica cultivar-group)] gb AAT69585.1  GTP-binding nuclear protein RAN-B1 [Oryza<br>sativa (japonica cultivar-group)] dbj BAA81911.1  Ran [Oryza sativa (japonica cultivar-group)] dbj BAB82438.1  small GTP-binding protein (Ran2) [Oryza sativa<br>(japonica cultivar-group)]                                                                                                                                                                       | 221   | 2E-17   |
|                       |                 |                     |                          |                     | >gb AAD18006.1  Ran-related GTP binding protein [Zea mays]                                                                                                                                                                                                                                                                                                                                                                                                                                                                                                                                                                                                                       | 221   | 2E-17   |
|                       |                 |                     |                          |                     | >emb CAC10213.1  GTP-binding protein [Cicer arietinum]                                                                                                                                                                                                                                                                                                                                                                                                                                                                                                                                                                                                                           | 170   | 1E-16   |
|                       |                 |                     |                          |                     | >gb AAM12880.1  GTP-binding protein [Helianthus annuus]                                                                                                                                                                                                                                                                                                                                                                                                                                                                                                                                                                                                                          | 221   | 1E-15   |
| CB380415              | 4.24E-03        | Mo17<B73=F1         | 2.91                     | 10                  | ns                                                                                                                                                                                                                                                                                                                                                                                                                                                                                                                                                                                                                                                                               |       |         |
|                       |                 |                     |                          |                     | >ref XP_479153.1  elongation factor 1 beta [Oryza sativa (japonica cultivar-group)]ref XP_506463.1  PREDICTED P0616D06.117 gene product [Oryza sativa<br>(japonica cultivar-group)] dbj BAC16499.1  elongation factor 1 beta [Oryza sativa (japonica cultivar-group)] dbj BAA04903.1  elongation factor 1 beta [Oryza<br>sativa (japonica cultivar-group)] sp Q40680 EF1D ORYSA Elongation factor 1-delta (EF-1-delta) (Elongation factor 1B-beta) (eEF-1B beta)                                                                                                                                                                                                                 | 229   | 7E-41   |
|                       |                 |                     |                          |                     | >emb CAB90214.1  putative elongation factor 1 beta [Hordeum vulgare subsp. vulgare]                                                                                                                                                                                                                                                                                                                                                                                                                                                                                                                                                                                              | 226   | 6E-40   |
|                       |                 |                     |                          |                     | >gb AAR15081.1  translational elongation factor 1 subunit Bbeta [Pisum sativum]                                                                                                                                                                                                                                                                                                                                                                                                                                                                                                                                                                                                  | 231   | 4E-39   |
|                       |                 |                     |                          |                     | >gb AAU89237.1  elongation factor 1 beta 2 [Oryza sativa (japonica cultivar-group)]dbj BAA34599.1  elongation factor 1 beta 2 [Oryza sativa (japonica cultivar-<br>group)] dbj BAA34598.1  elongation factor 1 beta 2 [Oryza sativa (japonica cultivar-group)]                                                                                                                                                                                                                                                                                                                                                                                                                   | 226   | 1E-38   |
|                       |                 |                     |                          |                     | >gb ABA81875.1  putative elongation factor 1B alpha-subunit0like [Solanumtuberosum] gb ABA40427.1  unknown [Solanum tuberosum]                                                                                                                                                                                                                                                                                                                                                                                                                                                                                                                                                   | 227   | 4E-38   |
|                       |                 |                     |                          |                     | >ref XP_475961.1  putative late embryogenesis abundant protein [Oryza sativa(japonica cultivar-group)] gb AAT47056.1  'putative late embryogenesis abundant<br>protein, LEA14-A' [Oryza sativa (japonica cultivar-group)] gb AAS16887.1  putative late embryogenesis abundant protein [Oryza sativa (japonica cultivar-group)]                                                                                                                                                                                                                                                                                                                                                   | 151   | 2E-72   |
|                       |                 |                     |                          |                     | >gb AAV88599.1  late embryonic abundant-like protein [Pennisetum glaucum]                                                                                                                                                                                                                                                                                                                                                                                                                                                                                                                                                                                                        | 176   | 4E-62   |
|                       |                 |                     |                          |                     | >ref NP_917764.1  putative embryogenesis-abundant protein [Oryza sativa (japonica cultivar-group)] dbj BAB19059.1  late embryogenesis-abundant protein Le14-<br>A-like [Oryza sativa (japonica cultivar-group)] dbj BAB21097.1  late embryogenesis-abundant protein Le14-A-like [Oryza sativa (japonica cultivar-group)]                                                                                                                                                                                                                                                                                                                                                         | 180   | 1E-61   |
|                       |                 |                     |                          |                     | >ref NP_913440.1  putative late embryogenesis abundant protein LEA14-A [Oryza sativa(japonica cultivar-group)] dbj BAB32715.1  putative late embryogenesis-<br>abundant protein [Oryza sativa (japonica cultivar-group)] dbj BAB92106.1  putative late embryogenesis-abundant protein [Oryza sativa (japonica cultivar-group)]                                                                                                                                                                                                                                                                                                                                                   | 151   | 4E-52   |
|                       |                 |                     |                          |                     | >emb CAI65403.1  dehydrin [Triticum turgidum subsp. durum]                                                                                                                                                                                                                                                                                                                                                                                                                                                                                                                                                                                                                       | 151   | 3E-51   |
| DV495681              | 4.28E-03        | F1=Mo17<B73         | 1.46                     | 9                   | >gb AAP80664.1  S28 ribosomal protein [Triticum aestivum]                                                                                                                                                                                                                                                                                                                                                                                                                                                                                                                                                                                                                        | 86    | 8E-22   |
|                       |                 |                     |                          |                     | >emb CAA04565.1  rpS28 [Hordeum vulgare subsp. vulgare]                                                                                                                                                                                                                                                                                                                                                                                                                                                                                                                                                                                                                          | 65    | 6E-20   |
|                       |                 |                     |                          |                     | >emb CAA57636.1  small subunit ribosomal protein S28 [Zea mays]sp P46302 RS28 MAIZE 40S ribosomal protein S28                                                                                                                                                                                                                                                                                                                                                                                                                                                                                                                                                                    | 65    | 8E-20   |
|                       |                 |                     |                          |                     | >emb CAA10103.1  ribosomal protein S28 [Prunus persica]emb CAA10102.1  ribosomal protein S28 [Prunus persica] emb CAA10101.1  ribosomal protein S28<br>[Prunus persica]                                                                                                                                                                                                                                                                                                                                                                                                                                                                                                          | 65    | 2E-18   |
|                       |                 |                     |                          |                     | >gb AAM78552.1  ribosomal protein small subunit 28 [Helianthus annuus]                                                                                                                                                                                                                                                                                                                                                                                                                                                                                                                                                                                                           | 65    | 7E-18   |
| CB885881              | 4.31E-03        | B73<F1=Mo17         | 1.41                     | 3                   | >emb CAA33620.1  GAPDH [Zea mays]sp P08735 G3PC MAIZE Glyceraldehyde-3-phosphate dehydrogenase, cytosolic 1                                                                                                                                                                                                                                                                                                                                                                                                                                                                                                                                                                      | 337   | 1E-17   |
|                       |                 |                     |                          |                     | >emb CAA30151.1  unnamed protein product [Zea mays]                                                                                                                                                                                                                                                                                                                                                                                                                                                                                                                                                                                                                              | 337   | 1E-17   |
|                       |                 |                     |                          |                     | >gb AAQ55395.1  glyceraldehyde-3-phosphate dehydrogenase [Hordeum vulgare subsp.spontaneum] gb AAQ55392.1  glyceraldehyde-3-phosphate dehydrogenase<br>[Hordeum vulgare subsp. spontaneum] gb AAQ55390.1  glyceraldehyde-3-phosphate dehydrogenase [Hordeum vulgare subsp. spontaneum] gb AAQ55388.1 <br>glyceraldehyde-3-phosphate dehydrogenase [Hordeum vulgare subsp. spontaneum] gb AAQ55382.1  glyceraldehyde-3-phosphate dehydrogenase [Hordeum vulgare<br>subsp. spontaneum] gb AAQ55382.1  glyceraldehyde-3-phosphate dehydrogenase [Hordeum vulgare subsp. spontaneum] gb AAQ55376.1  glyceraldehyde-3-<br>phosphate dehydrogenase [Hordeum vulgare subsp. spontaneum] | 245   | 3E-16   |



**Table 4. Microarray analysis results, mode of gene action classification, and BLAST annotation for the 1,367 ESTs identified as differentially expressed among genotypes (15% FDR)**

| GenBank accession no. | Overall P value | Significant pattern | Fold change <sup>†</sup> | Sector <sup>‡</sup> | BLAST annotation*                                                                                                                                                                                                                                                                                                                                                                                                                                                                                                                                                                                                                                                          | Score | E value |
|-----------------------|-----------------|---------------------|--------------------------|---------------------|----------------------------------------------------------------------------------------------------------------------------------------------------------------------------------------------------------------------------------------------------------------------------------------------------------------------------------------------------------------------------------------------------------------------------------------------------------------------------------------------------------------------------------------------------------------------------------------------------------------------------------------------------------------------------|-------|---------|
|                       |                 |                     |                          |                     | >emb CAB77673.1  14-3-3-like protein [Oryza sativa]dbj BAD29578.1  putative GF14-b protein [Oryza sativa (japonica cultivar-group)] dbj BAD27625.1  putative GF14-b protein [Oryza sativa (japonica cultivar-group)]                                                                                                                                                                                                                                                                                                                                                                                                                                                       | 262   | 2E-78   |
|                       |                 |                     |                          |                     | >emb CAA63658.1  Hv14-3-3b [Hordeum vulgare subsp. vulgare]sp Q43470 1433B HORVU 14-3-3-like protein B (14-3-3B)                                                                                                                                                                                                                                                                                                                                                                                                                                                                                                                                                           | 262   | 2E-78   |
| CD650893              | 4.36E-03        | F1=Mo17<B73         | 1.39                     | 9                   | ns                                                                                                                                                                                                                                                                                                                                                                                                                                                                                                                                                                                                                                                                         |       |         |
| CD001782              | 4.36E-03        | B73<F1=Mo17         | 1.47                     | 2                   | >dbj BAD54452.1  putative xyloglucan endotransglycosylase [Oryza sativa (japonica cultivar-group)]                                                                                                                                                                                                                                                                                                                                                                                                                                                                                                                                                                         | 290   | 1E-11   |
|                       |                 |                     |                          |                     | >emb CAA63662.1  xyloglucan endotransglycosylase (XET) [Hordeum vulgare subsp.vulgare]                                                                                                                                                                                                                                                                                                                                                                                                                                                                                                                                                                                     | 292   | 8E-11   |
|                       |                 |                     |                          |                     | >ref NP_200564.1  TCH4 (TOUCH 4); hydrolase, acting on glycosyl bonds / hydrolase,hydrolyzing O-glycosyl compounds [Arabidopsis thaliana] gb AAL38614.1  AT5g57560/MUA2_13 [Arabidopsis thaliana] gb AAL05902.1  AT5g57560/MUA2_13 [Arabidopsis thaliana] gb AAK96616.1  AT5g57560/MUA2_13 [Arabidopsis thaliana] gb AAK56251.1  AT5g57560/MUA2_13 [Arabidopsis thaliana] dbj BAB08791.1  TCH4 protein [Arabidopsis thaliana] sp Q38857 XTH22_ARATH Xyloglucan endotransglucosylase/hydrolase protein 22 precursor (At-XTH22) (XTH-22) (Touch protein 4) gb AAC05572.1  xyloglucan endotransglycosylase related protein [Arabidopsis thaliana] gb AAA92363.1  TCH4 protein | 284   | 1E-9    |
|                       |                 |                     |                          |                     | >emb CAC40807.1  Xet1 protein [Festuca pratensis]                                                                                                                                                                                                                                                                                                                                                                                                                                                                                                                                                                                                                          | 291   | 3E-9    |
|                       |                 |                     |                          |                     | >emb CAA63663.1  xyloglucan endotransglycosylase (XET) [Hordeum vulgare subsp.vulgare]                                                                                                                                                                                                                                                                                                                                                                                                                                                                                                                                                                                     | 286   | 3E-9    |
| CD485141              | 4.37E-03        | B73<F1=Mo17         | 1.37                     | 3                   | >dbj BAD28177.1  putative Chain C, Structure Of The Plant Transcriptional RegulatorPbf-2 [Oryza sativa (japonica cultivar-group)] dbj BAD28032.1  putative Chain C, Structure Of The Plant Transcriptional Regulator Pbf-2 [Oryza sativa (japonica cultivar-group)]                                                                                                                                                                                                                                                                                                                                                                                                        | 228   | 8E-78   |
|                       |                 |                     |                          |                     | >ref NP_177282.2  unknown protein [Arabidopsis thaliana]gb AAM67494.1  unknown protein [Arabidopsis thaliana] gb AAL59932.1  unknown protein [Arabidopsis thaliana]                                                                                                                                                                                                                                                                                                                                                                                                                                                                                                        | 238   | 1E-45   |
|                       |                 |                     |                          |                     | >gb AAG51881.1  unknown protein; 79476-81015 [Arabidopsis thaliana]                                                                                                                                                                                                                                                                                                                                                                                                                                                                                                                                                                                                        | 237   | 1E-45   |
|                       |                 |                     |                          |                     | >gb AAF91282.1  DNA-binding protein p24 [Solanum tuberosum]                                                                                                                                                                                                                                                                                                                                                                                                                                                                                                                                                                                                                | 274   | 1E-34   |
|                       |                 |                     |                          |                     | >pdb 1L3A D Chain D, Structure Of The Plant Transcriptional Regulator Pbf-2                                                                                                                                                                                                                                                                                                                                                                                                                                                                                                                                                                                                | 171   | 1E-34   |
| AW355879              | 4.37E-03        | B73<F1=Mo17         | 1.36                     | 3                   | >gb AAQ24341.1  O-methyltransferase [Zea mays]gb AAQ24340.1  O-methyltransferase [Zea mays]                                                                                                                                                                                                                                                                                                                                                                                                                                                                                                                                                                                | 364   | 1E-51   |
|                       |                 |                     |                          |                     | >gb AAQ24360.1  O-methyltransferase [Zea mays]gb AAQ24338.1  O-methyltransferase [Zea mays]                                                                                                                                                                                                                                                                                                                                                                                                                                                                                                                                                                                | 364   | 1E-51   |
|                       |                 |                     |                          |                     | >gb AAQ24369.1  O-methyltransferase [Zea mays]gb AAQ24367.1  O-methyltransferase [Zea mays] gb AAQ24352.1  O-methyltransferase [Zea mays]                                                                                                                                                                                                                                                                                                                                                                                                                                                                                                                                  | 364   | 1E-51   |
|                       |                 |                     |                          |                     | gb AAQ24349.1  O-methyltransferase [Zea mays] gb AAQ24337.1  O-methyltransferase [Zea mays]                                                                                                                                                                                                                                                                                                                                                                                                                                                                                                                                                                                | 364   | 1E-51   |
|                       |                 |                     |                          |                     | >gb AAQ24347.1  O-methyltransferase [Zea mays]gb AAQ24346.1  O-methyltransferase [Zea mays] sp Q06509 COMT1_MAIZE Caffeic acid 3-O-methyltransferase (S-adenosyl-L-methionine:caffeic acid 3-O-methyltransferase) (COMT) (CAOMT) gb AAB03364.1  O-methyltransferase                                                                                                                                                                                                                                                                                                                                                                                                        | 364   | 1E-51   |
|                       |                 |                     |                          |                     | >gb AAQ24339.1  O-methyltransferase [Zea mays]                                                                                                                                                                                                                                                                                                                                                                                                                                                                                                                                                                                                                             | 364   | 3E-51   |
| BG841347              | 4.37E-03        | Mo17<B73=F1         | 1.45                     | 11                  | >ref XP_483755.1  putative 60S ribosomal protein L10A (RPL10aC) [Oryza sativa(japonica cultivar-group)] dbj BAD09090.1  putative 60S ribosomal protein L10A (RPL10aC) [Oryza sativa (japonica cultivar-group)]                                                                                                                                                                                                                                                                                                                                                                                                                                                             | 216   | 6E-85   |
|                       |                 |                     |                          |                     | >dbj BAD28853.1  putative ribosomal protein L10a [Oryza sativa (japonica cultivar-group)]                                                                                                                                                                                                                                                                                                                                                                                                                                                                                                                                                                                  | 216   | 2E-82   |
|                       |                 |                     |                          |                     | >gb AAW50982.1  ribosomal protein L10A [Triticum aestivum]                                                                                                                                                                                                                                                                                                                                                                                                                                                                                                                                                                                                                 | 216   | 5E-81   |
|                       |                 |                     |                          |                     | >ref NP_563813.2  structural constituent of ribosome [Arabidopsis thaliana]gb AAM47861.1  putative ribosomal protein L10 [Arabidopsis thaliana]                                                                                                                                                                                                                                                                                                                                                                                                                                                                                                                            | 216   | 2E-79   |
|                       |                 |                     |                          |                     | gb AAL38253.1  putative ribosomal protein L10 [Arabidopsis thaliana] sp Q8VZB9 R10AA ARATH 60S ribosomal protein L10a-1                                                                                                                                                                                                                                                                                                                                                                                                                                                                                                                                                    | 216   | 2E-79   |
|                       |                 |                     |                          |                     | >ref NP_850104.1  structural constituent of ribosome [Arabidopsis thaliana]ref NP_565654.1  structural constituent of ribosome [Arabidopsis thaliana]                                                                                                                                                                                                                                                                                                                                                                                                                                                                                                                      |       |         |
|                       |                 |                     |                          |                     | gb AAL07257.1  putative 60S ribosomal protein L10A [Arabidopsis thaliana] gb AAK25856.1  putative 60S ribosomal protein L10A [Arabidopsis thaliana]                                                                                                                                                                                                                                                                                                                                                                                                                                                                                                                        |       |         |
|                       |                 |                     |                          |                     | gb AAM15190.1  60S ribosomal protein L10A [Arabidopsis thaliana] gb AAC73045.2  60S ribosomal protein L10A [Arabidopsis thaliana] gb AAL91152.1  60S ribosomal protein L10A [Arabidopsis thaliana] gb AAP13370.1  At2e27530 [Arabidopsis thaliana] sp P59230 R10AB ARATH 60S ribosomal protein L10a-2                                                                                                                                                                                                                                                                                                                                                                      | 216   | 5E-79   |
| DV942867              | 4.37E-03        | F1=Mo17<B73         | 2.2                      | 8                   | ns                                                                                                                                                                                                                                                                                                                                                                                                                                                                                                                                                                                                                                                                         |       |         |
| DV621372              | 4.39E-03        | Mo17<B73=F1         | 1.37                     | 11                  | >sp P23346 SODC5 MAIZE Superoxide dismutase [Cu-Zn] 4AP                                                                                                                                                                                                                                                                                                                                                                                                                                                                                                                                                                                                                    | 152   | 2E-84   |
|                       |                 |                     |                          |                     | >emb CAB57992.1  superoxide dismutase-4AP [Zea mays]sp P23345 SODC4 MAIZE Superoxide dismutase [Cu-Zn] 4A                                                                                                                                                                                                                                                                                                                                                                                                                                                                                                                                                                  | 152   | 1E-83   |
|                       |                 |                     |                          |                     | >emb CAB57993.1  superoxide dismutase-4A [Zea mays]gb AAB49913.1  superoxide dismutase 4A                                                                                                                                                                                                                                                                                                                                                                                                                                                                                                                                                                                  | 152   | 2E-82   |
|                       |                 |                     |                          |                     | >sp P28757 SODC2_ORYSA Superoxide dismutase [Cu-Zn] 2gb AAC14465.1  cytosolic copper/zinc-superoxide dismutase [Oryza sativa] dbj BAA00800.1  copper/zinc-superoxide dismutase [Oryza sativa (japonica cultivar-group)]                                                                                                                                                                                                                                                                                                                                                                                                                                                    | 152   | 3E-78   |
|                       |                 |                     |                          |                     | >gb AAY56345.1  cytoplasmic copper/zinc-superoxide dismutase [Oryza sativa (indicacultivar-group)] sp P28756 SODC1_ORYSA Superoxide dismutase [Cu-Zn] 1 gb AAC14464.1  cytosolic copper/zinc-superoxide dismutase [Oryza sativa] dbj BAA00799.1  copper/zinc-superoxide dismutase [Oryza sativa (japonica cultivar-group)] prf 2111424A Cu/Zn superoxide dismutase                                                                                                                                                                                                                                                                                                         | 152   | 3E-77   |
| BM339253              | 4.39E-03        | F1=Mo17<B73         | 1.31                     | 9                   | >ref XP_467824.1  putative FKBP-type peptidyl-prolyl cis-trans isomerase 3 [Oryzasativa (japonica cultivar-group)] ref XP_507531.1  PREDICTED P0431B06.35 gene product [Oryza sativa (japonica cultivar-group)] ref XP_506974.1  PREDICTED P0431B06.35 gene product [Oryza sativa (japonica cultivar-group)]                                                                                                                                                                                                                                                                                                                                                               | 230   | 5E-50   |
|                       |                 |                     |                          |                     | dbj BAD15648.1  putative FKBP-type peptidyl-prolyl cis-trans isomerase 3 [Oryza sativa (japonica cultivar-group)]                                                                                                                                                                                                                                                                                                                                                                                                                                                                                                                                                          | 217   | 6E-41   |
|                       |                 |                     |                          |                     | >ref NP_568067.1  FK506 binding / peptidyl-prolyl cis-trans isomerase [Arabidopsisthaliana] emb CAB64721.1  FKBP like protein [Arabidopsis thaliana]                                                                                                                                                                                                                                                                                                                                                                                                                                                                                                                       | 218   | 5E-25   |
|                       |                 |                     |                          |                     | >dbj BAD45876.1  putative peptidyl-prolyl cis-trans isomerase [Oryza sativa(japonica cultivar-group)]                                                                                                                                                                                                                                                                                                                                                                                                                                                                                                                                                                      |       |         |

**Table 4. Microarray analysis results, mode of gene action classification, and BLAST annotation for the 1,367 ESTs identified as differentially expressed among genotypes (15% FDR)**

| GenBank accession no. | Overall P value | Significant pattern | Fold change <sup>±</sup> | Sector <sup>±</sup> | BLAST annotation*                                                                                                                                                                                                                                                                                                                                                                                                                                                                                                                                                                                                                                                                    | Score | E value |
|-----------------------|-----------------|---------------------|--------------------------|---------------------|--------------------------------------------------------------------------------------------------------------------------------------------------------------------------------------------------------------------------------------------------------------------------------------------------------------------------------------------------------------------------------------------------------------------------------------------------------------------------------------------------------------------------------------------------------------------------------------------------------------------------------------------------------------------------------------|-------|---------|
|                       |                 |                     |                          |                     | >ref NP_199380.1  FK506 binding / peptidyl-prolyl cis-trans isomerase [Arabidopsisthaliana] gb AAM10279.1  AT5g45680/MRA19_7 [Arabidopsis thaliana] gb AAL57682.1  AT5g45680/MRA19_7 [Arabidopsis thaliana] dbj BAB09210.1  unnamed protein product [Arabidopsis thaliana] sp Q9SCY2 FKB13_ARATH FKBP-type peptidyl-prolyl cis-trans isomerase 3, chloroplast precursor (PPIase) (Rotamase) (AtFKBP13) (FK506 binding protein 1)                                                                                                                                                                                                                                                     | 208   | 1E-23   |
|                       |                 |                     |                          |                     | >emb CAD35362.1  FK506 binding protein 1 [Arabidopsis thaliana]                                                                                                                                                                                                                                                                                                                                                                                                                                                                                                                                                                                                                      | 208   | 1E-23   |
| CB329597              | 4.40E-03        | F1=Mo17<B73         | 1.24                     | 9                   | >gb ABA94601.1  ribosomal protein S4 [Oryza sativa (japonica cultivar-group)]gb ABA94599.1  ribosomal protein S4 [Oryza sativa (japonica cultivar-group)]                                                                                                                                                                                                                                                                                                                                                                                                                                                                                                                            | 195   | 3E-95   |
|                       |                 |                     |                          |                     | >gb ABA94602.1  ribosomal protein S4 [Oryza sativa (japonica cultivar-group)]                                                                                                                                                                                                                                                                                                                                                                                                                                                                                                                                                                                                        | 192   | 7E-92   |
|                       |                 |                     |                          |                     | >gb ABA46767.1  unknown [Solanum tuberosum]                                                                                                                                                                                                                                                                                                                                                                                                                                                                                                                                                                                                                                          | 197   | 5E-90   |
|                       |                 |                     |                          |                     | >emb CAG47084.1  40S ribosomal protein S9 [Catharanthus roseus]                                                                                                                                                                                                                                                                                                                                                                                                                                                                                                                                                                                                                      | 197   | 7E-90   |
|                       |                 |                     |                          |                     | >gb AAU93594.1  putative ribosomal protein [Solanum demissum]                                                                                                                                                                                                                                                                                                                                                                                                                                                                                                                                                                                                                        | 197   | 2E-89   |
| DV621095              | 4.41E-03        | B73<F1=Mo17         | 1.42                     | 3                   | >ref NP_922279.1  actin [Oryza sativa (japonica cultivar-group)]gb AAK84456.1  actin [Oryza sativa (japonica cultivar-group)] gb AAP54566.1  actin [Oryza sativa (japonica cultivar-group)] sp P17298 ACT2_ORYSA Actin-2                                                                                                                                                                                                                                                                                                                                                                                                                                                             | 377   | 1E-86   |
|                       |                 |                     |                          |                     | >ref NP_196543.1  ACT7 [Arabidopsis thaliana]gb AAM20037.1  putative actin 2/7 protein [Arabidopsis thaliana] gb AAL36336.1  putative ACTIN 2/7 protein [Arabidopsis thaliana] gb AAM53337.1  actin 2/7 [Arabidopsis thaliana] gb AAM47998.1  ACTIN 2/7 [Arabidopsis thaliana] gb AAL32780.1  ACTIN 2/7 [Arabidopsis thaliana] dbj BAB09402.1  ACTIN 2/7 [Arabidopsis thaliana] sp P53492 ACT7_ARATH Actin-7 (Actin-2) gb AAB52506.1  actin7 gb AAA80356.1  actin-2                                                                                                                                                                                                                  | 377   | 4E-85   |
|                       |                 |                     |                          |                     | >gb AAD03741.1  actin [Brassica napus]                                                                                                                                                                                                                                                                                                                                                                                                                                                                                                                                                                                                                                               | 377   | 6E-85   |
|                       |                 |                     |                          |                     | >gb AAX95100.1  actin [Oryza sativa (japonica cultivar-group)]gb AAX95099.1  actin [Oryza sativa (japonica cultivar-group)] gb AAX95098.1  actin [Oryza sativa (japonica cultivar-group)] gb AAO62546.1  actin [Oryza sativa (japonica cultivar-group)] gb ABA91668.1  actin [Oryza sativa (japonica cultivar-group)]                                                                                                                                                                                                                                                                                                                                                                | 377   | 6E-85   |
|                       |                 |                     |                          |                     | gb ABA91667.1  actin [Oryza sativa (japonica cultivar-group)] gb ABA91666.1  actin [Oryza sativa (japonica cultivar-group)]                                                                                                                                                                                                                                                                                                                                                                                                                                                                                                                                                          | 377   | 6E-85   |
|                       |                 |                     |                          |                     | >gb AAW63030.1  actin [Isatis tinctoria]                                                                                                                                                                                                                                                                                                                                                                                                                                                                                                                                                                                                                                             | 378   | 6E-85   |
| CD484983              | 4.41E-03        | F1=Mo17<B73         | 1.25                     | 9                   | >gb AAN04491.1  phosphoribosyl pyrophosphate synthetase [Saccharum hybrid cultivar]                                                                                                                                                                                                                                                                                                                                                                                                                                                                                                                                                                                                  | 328   | 7E-51   |
|                       |                 |                     |                          |                     | >ref XP_467457.1  putative phosphoribosyl pyrophosphate synthetase [Oryza sativa(japonica cultivar-group)] ref XP_507525.1  PREDICTED OJ1479_B12.26 gene product [Oryza sativa (japonica cultivar-group)] ref XP_506937.1  PREDICTED OJ1479_B12.26 gene product [Oryza sativa (japonica cultivar-group)] dbj BAD09159.1  putative phosphoribosyl pyrophosphate synthetase [Oryza sativa (japonica cultivar-group)] dbj BAD07797.1  putative phosphoribosyl pyrophosphate synthetase [Oryza sativa (japonica cultivar-group)] sp Q6ZFT5 KPRS4_ORYSA Ribose-phosphate pyrophosphokinase 4 (Phosphoribosyl pyrophosphate synthetase 4)                                                  | 325   | 3E-47   |
|                       |                 |                     |                          |                     | >ref NP_181819.1  ribose phosphate diphosphokinase [Arabidopsis thaliana]emb CAB43553.1  phosphoribosyl diphosphate synthase [Arabidopsis thaliana] gb AAN15402.1  putative ribose phosphate pyrophosphokinase [Arabidopsis thaliana] gb AAM91605.1  putative ribose phosphate pyrophosphokinase [Arabidopsis thaliana] gb AAD21718.1  putative ribose phosphate pyrophosphokinase [Arabidopsis thaliana] gb AAM15296.1  putative ribose phosphate pyrophosphokinase [Arabidopsis thaliana] gb AAM64955.1  putative ribose phosphate pyrophosphokinase [Arabidopsis thaliana] sp Q680A5 KPRS4_ARATH Ribose-phosphate pyrophosphokinase 4 (Phosphoribosyl pyrophosphate synthetase 4) | 337   | 5E-38   |
|                       |                 |                     |                          |                     | >ref NP_916715.1  putative phosphoribosyl pyrophosphate synthase [Oryza sativa(japonica cultivar-group)] dbj BAB89498.1  putative phosphoribosyl pyrophosphate synthase [Oryza sativa (japonica cultivar-group)] sp Q8S2E5 KPRS3_ORYSA Ribose-phosphate pyrophosphokinase 3 (Phosphoribosyl pyrophosphate synthetase 3)                                                                                                                                                                                                                                                                                                                                                              | 409   | 6E-37   |
|                       |                 |                     |                          |                     | >emb CAB43602.1  phosphoribosyl pyrophosphate synthase isozyme 4 [Spinacia oleracea]sp Q9XGA1 KPRS4_SPIOL Ribose-phosphate pyrophosphokinase 4 (Phosphoribosyl pyrophosphate synthetase 4)                                                                                                                                                                                                                                                                                                                                                                                                                                                                                           | 318   | 6E-37   |
| CD670329              | 4.42E-03        | F1=Mo17<B73         | 1.59                     | 9                   | ns                                                                                                                                                                                                                                                                                                                                                                                                                                                                                                                                                                                                                                                                                   |       |         |
| DV491801              | 4.43E-03        | B73<F1=Mo17         | 1.49                     | 2                   | >ref XP_480473.1  putative Aconitate hydratase [Oryza sativa (japonica cultivar-group)]dbj BAD05751.1  putative Aconitate hydratase [Oryza sativa (japonica cultivar-group)]                                                                                                                                                                                                                                                                                                                                                                                                                                                                                                         | 898   | 9E-40   |
|                       |                 |                     |                          |                     | >dbj BAD94991.1  cytoplasmic aconitate hydratase [Arabidopsis thaliana]                                                                                                                                                                                                                                                                                                                                                                                                                                                                                                                                                                                                              | 328   | 7E-38   |
|                       |                 |                     |                          |                     | >ref NP_178634.2  RNA binding / aconitate hydratase/ hydro-lyase/ iron ion binding /lyase [Arabidopsis thaliana] gb AAP68248.1  At2g05710 [Arabidopsis thaliana] gb AAM97080.1  cytoplasmic aconitate hydratase [Arabidopsis thaliana]                                                                                                                                                                                                                                                                                                                                                                                                                                               | 990   | 7E-38   |
|                       |                 |                     |                          |                     | >gb AAD25640.1  cytoplasmic aconitate hydratase [Arabidopsis thaliana]                                                                                                                                                                                                                                                                                                                                                                                                                                                                                                                                                                                                               | 898   | 7E-38   |
|                       |                 |                     |                          |                     | >dbj BAE71240.1  putative cytoplasmic aconitate hydratase [Trifolium pratense]                                                                                                                                                                                                                                                                                                                                                                                                                                                                                                                                                                                                       | 316   | 2E-36   |
| CB331027              | 4.43E-03        | Mo17<B73=F1         | 1.36                     | 10                  | >ref XP_468756.1  putative ribosomal protein S19 [Oryza sativa (japonicacultivar-group)] ref XP_468752.1  putative ribosomal protein S19 [Oryza sativa (japonica cultivar-group)] gb AAP20855.1  putative ribosomal protein S19 [Oryza sativa (japonica cultivar-group)] gb AAP20842.1  putative ribosomal protein S19 [Oryza sativa (japonica cultivar-group)] sp P40978 RS19_ORYSA 40S ribosomal protein S19                                                                                                                                                                                                                                                                       | 146   | 7E-75   |
|                       |                 |                     |                          |                     | >gb AAW34237.1  putative ribosomal protein S19 [Oryza sativa (japonicacultivar-group)]                                                                                                                                                                                                                                                                                                                                                                                                                                                                                                                                                                                               | 144   | 4E-72   |
|                       |                 |                     |                          |                     | >gb AAW34236.1  putative ribosomal protein S19 [Oryza sativa (japonicacultivar-group)]                                                                                                                                                                                                                                                                                                                                                                                                                                                                                                                                                                                               | 166   | 3E-71   |
|                       |                 |                     |                          |                     | >gb AAW34240.1  putative ribosomal protein S19 [Oryza sativa (japonicacultivar-group)]                                                                                                                                                                                                                                                                                                                                                                                                                                                                                                                                                                                               | 122   | 1E-64   |
|                       |                 |                     |                          |                     | >gb ABB87116.1  40S ribosomal protein S19-like [Solanum tuberosum]                                                                                                                                                                                                                                                                                                                                                                                                                                                                                                                                                                                                                   | 143   | 2E-61   |
| CBB16349              | 4.45E-03        | B73<F1=Mo17         | 1.36                     | 3                   | >ref XP_472639.1  OSJNBa0058G03.7 [Oryza sativa (japonica cultivar-group)]emb CAE02431.2  OSJNBa0058G03.7 [Oryza sativa (japonica cultivar-group)] emb CAE02442.2  OSJNBa0027P08.4 [Oryza sativa (japonica cultivar-group)]                                                                                                                                                                                                                                                                                                                                                                                                                                                          | 425   | 8E-39   |

**Table 4. Microarray analysis results, mode of gene action classification, and BLAST annotation for the 1,367 ESTs identified as differentially expressed among genotypes (15% FDR)**

| GenBank accession no. | Overall P value | Significant pattern | Fold change <sup>†</sup> | Sector <sup>‡</sup> | BLAST annotation*                                                                                                                                                                                                                                                                                                                                                                                                                                                                                | Score | E value |
|-----------------------|-----------------|---------------------|--------------------------|---------------------|--------------------------------------------------------------------------------------------------------------------------------------------------------------------------------------------------------------------------------------------------------------------------------------------------------------------------------------------------------------------------------------------------------------------------------------------------------------------------------------------------|-------|---------|
|                       |                 |                     |                          |                     | >ref NP_174210.1  AT9S (19S PROTEOSOME SUBUNIT 9) [Arabidopsis thaliana]gb AAP86663.1  26S proteasome subunit RPN6a [Arabidopsis thaliana]                                                                                                                                                                                                                                                                                                                                                       |       |         |
|                       |                 |                     |                          |                     | gb AAP86662.1  26S proteasome subunit RPN6a [Arabidopsis thaliana] gb AAL07160.1  putative 19S proteasome subunit 9 [Arabidopsis thaliana]                                                                                                                                                                                                                                                                                                                                                       | 419   | 4E-20   |
|                       |                 |                     |                          |                     | gb AAK44018.1  putative 19S proteasome subunit 9 [Arabidopsis thaliana] gb AAF88122.1  Similar to 26S proteasome subunits [Arabidopsis thaliana]                                                                                                                                                                                                                                                                                                                                                 | 421   | 4E-20   |
|                       |                 |                     |                          |                     | >gb AAC34120.1  19S proteasome subunit 9 [Arabidopsis thaliana]                                                                                                                                                                                                                                                                                                                                                                                                                                  | 419   | 2E-19   |
|                       |                 |                     |                          |                     | >gb AAP86661.1  26S proteasome subunit RPN6a [Arabidopsis thaliana]                                                                                                                                                                                                                                                                                                                                                                                                                              | 399   | 4E-17   |
|                       |                 |                     |                          |                     | >gb AAP86664.1  26S proteasome subunit RPN6a [Arabidopsis thaliana]                                                                                                                                                                                                                                                                                                                                                                                                                              |       |         |
| CD001199              | 4.45E-03        | Mo17<B73=F1         | 1.26                     | 10                  | >gb ABA94601.1  ribosomal protein S4 [Oryza sativa (japonica cultivar-group)]gb ABA94599.1  ribosomal protein S4 [Oryza sativa (japonica cultivar-group)]                                                                                                                                                                                                                                                                                                                                        | 195   | 4E-99   |
|                       |                 |                     |                          |                     | >gb ABA94602.1  ribosomal protein S4 [Oryza sativa (japonica cultivar-group)]                                                                                                                                                                                                                                                                                                                                                                                                                    | 192   | 1E-95   |
|                       |                 |                     |                          |                     | >emb CAG47084.1  40S ribosomal protein S9 [Catharanthus roseus]                                                                                                                                                                                                                                                                                                                                                                                                                                  | 197   | 6E-91   |
|                       |                 |                     |                          |                     | >gb ABA46767.1  unknown [Solanum tuberosum]                                                                                                                                                                                                                                                                                                                                                                                                                                                      | 197   | 6E-91   |
|                       |                 |                     |                          |                     | >gb AAU93594.1  putative ribosomal protein [Solanum demissum]                                                                                                                                                                                                                                                                                                                                                                                                                                    | 197   | 2E-90   |
|                       |                 |                     |                          |                     | >ref XP_470037.1  putative 40S ribosomal protein S2 [Oryza sativa (japonica cultivar-group)] gb AAP21434.1  putative 40S ribosomal protein S2 [Oryza sativa (japonica cultivar-group)]                                                                                                                                                                                                                                                                                                           | 274   | 2E-58   |
| AW585293              | 4.49E-03        | Mo17<B73=F1         | 1.38                     | 10                  | >ref XP_477083.1  putative 40S ribosomal protein S2 [Oryza sativa (japonica cultivar-group)] dbj BAC83243.1  putative 40S ribosomal protein S2 [Oryza sativa (japonica cultivar-group)]                                                                                                                                                                                                                                                                                                          | 276   | 7E-56   |
|                       |                 |                     |                          |                     | >emb CAC27136.1  40S ribosomal protein S2 [Picea abies]                                                                                                                                                                                                                                                                                                                                                                                                                                          | 232   | 3E-52   |
|                       |                 |                     |                          |                     | >gb AAM62944.1  40S ribosomal protein S2 [Arabidopsis thaliana]                                                                                                                                                                                                                                                                                                                                                                                                                                  | 285   | 2E-50   |
|                       |                 |                     |                          |                     | >ref NP_181715.1  structural constituent of ribosome [Arabidopsis thaliana]gb AAM91391.1  At2g41840/T11A7.6 [Arabidopsis thaliana] gb AAC02764.1  40S ribosomal protein S2 [Arabidopsis thaliana] gb AAK82512.1  At2g41840/T11A7.6 [Arabidopsis thaliana] sp P49688 RS2_ARATH 40S ribosomal protein S2                                                                                                                                                                                           | 285   | 2E-50   |
|                       |                 |                     |                          |                     | >ref XP_470662.1  Putative phosphate/phosphoenolpyruvate translocator protein [Oryza sativa (japonica cultivar-group)] gb AAO16996.1  Putative phosphate/phosphoenolpyruvate translocator protein [Oryza sativa (japonica cultivar-group)]                                                                                                                                                                                                                                                       | 322   | 3E-7    |
| DV490563              | 4.52E-03        | B73<F1=Mo17         | 1.35                     | 2                   | >dbj BAD91177.1  plastidic phosphate translocator-like protein2 [Mesembryanthemumcrystallinum]                                                                                                                                                                                                                                                                                                                                                                                                   | 306   | 4E-7    |
|                       |                 |                     |                          |                     | >ref NP_187740.2  organic anion transporter [Arabidopsis thaliana]gb AAU94370.1  At3g11320 [Arabidopsis thaliana]                                                                                                                                                                                                                                                                                                                                                                                | 308   | 2E-6    |
|                       |                 |                     |                          |                     | >gb AAG50965.1  integral membrane protein, putative; 85705-84183 [Arabidopsis thaliana]                                                                                                                                                                                                                                                                                                                                                                                                          | 344   | 2E-6    |
|                       |                 |                     |                          |                     | >ref NP_196201.2  organic anion transporter [Arabidopsis thaliana]gb AAU45213.1  At5g05820 [Arabidopsis thaliana] gb AAT70430.1  At5g05820 [Arabidopsis thaliana]                                                                                                                                                                                                                                                                                                                                | 309   | 4E-6    |
|                       |                 |                     |                          |                     | >ref XP_475416.1  putative 40S ribosomal protein S26 [Oryza sativa (japonica cultivar-group)] gb AAT01360.1  putative 40S ribosomal protein S26 [Oryza sativa (japonica cultivar-group)]                                                                                                                                                                                                                                                                                                         | 194   | 7E-32   |
| CD484325              | 4.52E-03        | Mo17<B73=F1         | 1.47                     | 10                  | >dbj BAD87076.1  putative ribosomal protein S26 [Oryza sativa (japonica cultivar-group)] dbj BAD73505.1  putative ribosomal protein S26 [Oryza sativa (japonica cultivar-group)]                                                                                                                                                                                                                                                                                                                 | 133   | 7E-32   |
|                       |                 |                     |                          |                     | >sp P49216 RS26_ORYSA 40S ribosomal protein S26 (S31)dbj BAA07208.1  ribosomal protein S31 [Oryza sativa (japonica cultivar-group)]                                                                                                                                                                                                                                                                                                                                                              | 133   | 6E-31   |
|                       |                 |                     |                          |                     | >gb AAD47346.1  ribosomal protein S26 [Pisum sativum]                                                                                                                                                                                                                                                                                                                                                                                                                                            | 130   | 3E-26   |
|                       |                 |                     |                          |                     | >ref NP_191193.1  structural constituent of ribosome [Arabidopsis thaliana]emb CAB87433.1  40S ribosomal protein S26 homolog [Arabidopsis thaliana] gb AAM91494.1  AT3g56340/F18O21_300 [Arabidopsis thaliana] gb AAK63990.1  AT3g56340/F18O21_300 [Arabidopsis thaliana]                                                                                                                                                                                                                        | 130   | 3E-25   |
| CB886120              | 4.55E-03        | Mo17<B73=F1         | 1.44                     | 10                  | >ref XP_474251.1  OSJNBa0087O24.9 [Oryza sativa (japonica cultivar-group)]emb CAE03586.1  OSJNBa0087O24.9 [Oryza sativa (japonica cultivar-group)]                                                                                                                                                                                                                                                                                                                                               | 309   | 3E-16   |
|                       |                 |                     |                          |                     | >dbj BAD35424.1  KH domain-containing protein / zinc finger protein-like [Oryza sativa (japonica cultivar-group)]                                                                                                                                                                                                                                                                                                                                                                                | 295   | 1E-12   |
|                       |                 |                     |                          |                     | >ref XP_464444.1  KH domain-containing protein-like [Oryza sativa (japonica cultivar-group)] dbj BAD15406.1  KH domain-containing protein-like [Oryza sativa (japonica cultivar-group)]                                                                                                                                                                                                                                                                                                          | 300   | 2E-11   |
|                       |                 |                     |                          |                     | >ref NP_566412.1  nucleic acid binding / transcription factor [Arabidopsis thaliana]gb AAM62964.1  unknown [Arabidopsis thaliana] gb AAG51040.1  unknown protein; 15726-17646 [Arabidopsis thaliana]                                                                                                                                                                                                                                                                                             | 248   | 1E-8    |
|                       |                 |                     |                          |                     | >dbj BAB01961.1  unnamed protein product [Arabidopsis thaliana]                                                                                                                                                                                                                                                                                                                                                                                                                                  | 231   | 1E-8    |
|                       |                 |                     |                          |                     | >gb AAV36518.1  vacuolar ATPase subunit c isoform [Pennisetum glaucum]gb AAL08022.1  vacuolar H+-ATPase 16 kDa proteolipid subunit c [Pennisetum glaucum]                                                                                                                                                                                                                                                                                                                                        | 165   | 3E-49   |
| CB334565              | 4.58E-03        | Mo17<B73=F1         | 1.28                     | 10                  | >gb AAK91135.1  V-ATPase subunit c [Porteresia coarctata]gb ABA95923.1  V-type ATPase, C subunit [Oryza sativa (japonica cultivar-group)]                                                                                                                                                                                                                                                                                                                                                        | 165   | 3E-49   |
|                       |                 |                     |                          |                     | >gb AAX93004.1  V-type ATPase, C subunit, putative [Oryza sativa (japonica cultivar-group)] sp Q40635 VATL_ORYSA Vacuolar ATP synthase 16 kDa proteolipid subunit gb ABA91617.1  V-type ATPase, C subunit, putative [Oryza sativa (japonica cultivar-group)] gb AAA68175.1  H+-ATPase                                                                                                                                                                                                            | 165   | 3E-49   |
|                       |                 |                     |                          |                     | >ref NP_177693.1  AVA-P; ATPase [Arabidopsis thaliana]gb AAM19995.1  At1g75630/F10A5_17 [Arabidopsis thaliana] gb AAL11568.1  At1g75630/F10A5_17 [Arabidopsis thaliana] gb AAF87129.1  F10A5.17 [Arabidopsis thaliana] gb AAD38803.1  vacuolar H+-pumping ATPase 16 kDa subunit c isoform 4 [Arabidopsis thaliana] sp P59229 VATL4_ARATH Vacuolar ATP synthase 16 kDa proteolipid subunit 4 (V-ATPase 16 kDa proteolipid subunit 4) gb AAA99936.1  vacuolar H+-pumping ATPase 16 kDa proteolipid | 166   | 9E-49   |
|                       |                 |                     |                          |                     | >sp P23957 VATL_AVESA Vacuolar ATP synthase 16 kDa proteolipid subunitgb AAA32712.1  H+-ATPase                                                                                                                                                                                                                                                                                                                                                                                                   | 165   | 9E-49   |
| CB886286              | 4.61E-03        | B73<F1=Mo17         | 1.28                     | 3                   | >gb AAK56131.1  beta-expansin 8 [Zea mays]                                                                                                                                                                                                                                                                                                                                                                                                                                                       | 286   | 2E-84   |

**Table 4. Microarray analysis results, mode of gene action classification, and BLAST annotation for the 1,367 ESTs identified as differentially expressed among genotypes (15% FDR)**

| GenBank accession no. | Overall P value | Significant pattern | Fold change <sup>†</sup> | Sector <sup>‡</sup> | BLAST annotation*                                                                                                                                                                                                                                                                                                                                                                                                                    | Score | E value |
|-----------------------|-----------------|---------------------|--------------------------|---------------------|--------------------------------------------------------------------------------------------------------------------------------------------------------------------------------------------------------------------------------------------------------------------------------------------------------------------------------------------------------------------------------------------------------------------------------------|-------|---------|
|                       |                 |                     |                          |                     | >ref NP_922683.1  beta-expansin EXPB4 [Oryza sativa (japonica cultivar-group)] gb AAK55466.1  beta-expansin (EXPB4) [Oryza sativa (japonica cultivar-group)]                                                                                                                                                                                                                                                                         | 286   | 9E-80   |
|                       |                 |                     |                          |                     | gb AAP54970.1  beta-expansin [Oryza sativa (japonica cultivar-group)]                                                                                                                                                                                                                                                                                                                                                                | 286   | 2E-79   |
|                       |                 |                     |                          |                     | >gb AAF72985.1  beta-expansin [Oryza sativa]                                                                                                                                                                                                                                                                                                                                                                                         | 278   | 3E-74   |
|                       |                 |                     |                          |                     | >gb AAS48880.1  expansin EXPB2 [Triticum aestivum]                                                                                                                                                                                                                                                                                                                                                                                   | 175   | 3E-73   |
|                       |                 |                     |                          |                     | >gb AAK56125.1  beta-expansin 2 [Zea mays]                                                                                                                                                                                                                                                                                                                                                                                           |       |         |
| DV622582              | 4.64E-03        | Mo17<B73=F1         | 1.23                     | 10                  | >ref NP_908805.1  putative GTP-binding protein [Oryza sativa (japonica cultivar-group)] dbj BAB67979.1  putative small GTP-binding protein Bsarl a [Oryza sativa (japonica cultivar-group)] dbj BAB63877.1  putative small GTP-binding protein Bsarl a [Oryza sativa (japonica cultivar-group)]                                                                                                                                      | 193   | 8E-49   |
|                       |                 |                     |                          |                     | >ref NP_192117.1  ASAR1; GTP binding [Arabidopsis thaliana] emb CAB80701.1  SAR1/GTP-binding secretory factor [Arabidopsis thaliana] gb AAM20333.1  putative SAR1/GTP-binding secretory factor [Arabidopsis thaliana] gb AAL38798.1  putative SAR1/GTP-binding secretory factor [Arabidopsis thaliana]                                                                                                                               |       |         |
|                       |                 |                     |                          |                     | gb AAM67080.1  SAR1/GTP-binding secretory factor [Arabidopsis thaliana] gb AAC78700.1  SAR1/GTP-binding secretory factor [Arabidopsis thaliana]                                                                                                                                                                                                                                                                                      | 193   | 2E-48   |
|                       |                 |                     |                          |                     | gb AAB57799.1  AGAA.4 [Arabidopsis thaliana] sp O04834 SAR1A ARATH GTP-binding protein SAR1A gb AAA99827.1  Sar1 homolog                                                                                                                                                                                                                                                                                                             | 193   | 5E-48   |
|                       |                 |                     |                          |                     | >gb AAC32610.1  ras-like small monomeric GTP-binding protein [Avena fatua]                                                                                                                                                                                                                                                                                                                                                           | 193   | 5E-48   |
|                       |                 |                     |                          |                     | >gb ABA98928.1  ADP-ribosylation factor family [Oryza sativa (japonica cultivar-group)]                                                                                                                                                                                                                                                                                                                                              |       |         |
|                       |                 |                     |                          |                     | >ref NP_912773.1  unnamed protein product [Oryza sativa (japonica cultivar-group)] gb AAT28677.1  GTP-binding protein [Oryza sativa (japonica cultivar-group)]                                                                                                                                                                                                                                                                       | 193   | 3E-47   |
|                       |                 |                     |                          |                     | dbj BAA84612.1  putative small GTP-binding protein Bsarl a [Oryza sativa (japonica cultivar-group)]                                                                                                                                                                                                                                                                                                                                  |       |         |
| BM080488              | 4.64E-03        | F1=Mo17<B73         | 2.2                      | 9                   | >gb AAT75262.1  putative DnaJ like protein [Oryza sativa (japonica cultivar-group)]                                                                                                                                                                                                                                                                                                                                                  | 417   | 2E-44   |
|                       |                 |                     |                          |                     | >emb CAD29846.1  putative DnaJ protein [Oryza sativa (japonica cultivar-group)]                                                                                                                                                                                                                                                                                                                                                      | 108   | 2E-44   |
|                       |                 |                     |                          |                     | >gb AAD51625.1  seed maturation protein PM37 [Glycine max]                                                                                                                                                                                                                                                                                                                                                                           | 417   | 2E-40   |
|                       |                 |                     |                          |                     | >emb CAA63965.1  DnaJ protein [Solanum tuberosum]                                                                                                                                                                                                                                                                                                                                                                                    | 419   | 2E-39   |
|                       |                 |                     |                          |                     | >gb AAN87055.1  tuber-induction protein [Solanum tuberosum]                                                                                                                                                                                                                                                                                                                                                                          | 315   | 2E-39   |
| CB604380              | 4.64E-03        | B73<F1=Mo17         | 1.32                     | 3                   | >gb AAT68209.1  putative histone H2B [Cynodon dactylon]                                                                                                                                                                                                                                                                                                                                                                              | 98    | 3E-30   |
|                       |                 |                     |                          |                     | >ref XP_475912.1  putative histone H2B [Oryza sativa (japonica cultivar-group)] gb AAU44113.1  putative histone H2B [Oryza sativa (japonica cultivar-group)]                                                                                                                                                                                                                                                                         |       |         |
|                       |                 |                     |                          |                     | gb AAT69583.1  putative histone H2B [Oryza sativa (japonica cultivar-group)]                                                                                                                                                                                                                                                                                                                                                         | 152   | 3E-30   |
|                       |                 |                     |                          |                     | >ref NP_915412.1  putative histone H2B [Oryza sativa (japonica cultivar-group)] dbj BAB93209.1  putative histone H2B [Oryza sativa (japonica cultivar-group)]                                                                                                                                                                                                                                                                        |       |         |
|                       |                 |                     |                          |                     | dbj BAB67889.1  putative histone H2B [Oryza sativa (japonica cultivar-group)]                                                                                                                                                                                                                                                                                                                                                        | 139   | 3E-30   |
|                       |                 |                     |                          |                     | >ref NP_909298.1  putative histone H2B [Oryza sativa (japonica cultivar-group)] dbj BAB44055.1  putative histone H2B [Oryza sativa (japonica cultivar-group)]                                                                                                                                                                                                                                                                        | 155   | 3E-30   |
|                       |                 |                     |                          |                     | >ref NP_909263.1  putative histone H2B [Oryza sativa (japonica cultivar-group)] dbj BAB44008.1  putative histone H2B [Oryza sativa (japonica cultivar-group)]                                                                                                                                                                                                                                                                        | 153   | 3E-30   |
| BM337948              | 4.67E-03        | Mo17<B73=F1         | 1.64                     | 10                  | >gb AAV2491.1  unknown protein [Oryza sativa (japonica cultivar-group)]                                                                                                                                                                                                                                                                                                                                                              | 259   | 2E-6    |
| DV550289              | 4.68E-03        | B73<F1=Mo17         | 1.24                     | 3                   | >ref XP_475481.1  putative SMC protein [Oryza sativa (japonica cultivar-group)] gb AAT07581.1  putative SMC protein [Oryza sativa (japonica cultivar-group)]                                                                                                                                                                                                                                                                         | 1241  | 9E-8    |
|                       |                 |                     |                          |                     | >emb CAD32690.1  SMC4 protein [Oryza sativa]                                                                                                                                                                                                                                                                                                                                                                                         | 1236  | 9E-8    |
|                       |                 |                     |                          |                     | >ref NP_199671.1  ATSMC3; ATP binding [Arabidopsis thaliana] dbj BAB10693.1  chromosome condensation protein [Arabidopsis thaliana]                                                                                                                                                                                                                                                                                                  | 1241  | 9E-8    |
|                       |                 |                     |                          |                     | >emb CAD59406.1  SMC4 protein [Anopheles gambiae]                                                                                                                                                                                                                                                                                                                                                                                    | 1376  | 4E-7    |
|                       |                 |                     |                          |                     | >gb EAA12256.2  ENSANGP00000018543 [Anopheles gambiae str. PEST] ref XP_317674.2  ENSANGP00000018543 [Anopheles gambiae str. PEST]                                                                                                                                                                                                                                                                                                   | 1376  | 4E-7    |
| BM073988              | 4.68E-03        | B73<F1=Mo17         | 1.55                     | 3                   | >ref XP_466799.1  putative CER1 protein [Oryza sativa (japonica cultivar-group)] dbj BAD21579.1  putative CER1 protein [Oryza sativa (japonica cultivar-group)]                                                                                                                                                                                                                                                                      | 619   | 4E-46   |
|                       |                 |                     |                          |                     | dbj BAD21539.1  putative CER1 protein [Oryza sativa (japonica cultivar-group)]                                                                                                                                                                                                                                                                                                                                                       | 597   | 4E-43   |
|                       |                 |                     |                          |                     | >ref XP_473150.1  OSJNBa0004N05.14 [Oryza sativa (japonica cultivar-group)] emb CAE03390.2  OSJNBa0004N05.14 [Oryza sativa (japonica cultivar-group)]                                                                                                                                                                                                                                                                                |       |         |
|                       |                 |                     |                          |                     | >ref NP_921941.1  putative CER1 [Oryza sativa (japonica cultivar-group)] gb AAG21908.1  putative CER1 [Oryza sativa] gb AAP54228.1  CER1, putative [Oryza sativa (japonica cultivar-group)]                                                                                                                                                                                                                                          | 621   | 2E-35   |
|                       |                 |                     |                          |                     | >gb AAC23640.1  CER1-like protein [Arabidopsis thaliana]                                                                                                                                                                                                                                                                                                                                                                             | 635   | 8E-31   |
|                       |                 |                     |                          |                     | >ref XP_468372.1  putative CER1 [Oryza sativa (japonica cultivar-group)] dbj BAD22402.1  putative CER1 [Oryza sativa (japonica cultivar-group)]                                                                                                                                                                                                                                                                                      |       |         |
|                       |                 |                     |                          |                     | dbj BAD21663.1  putative CER1 [Oryza sativa (japonica cultivar-group)]                                                                                                                                                                                                                                                                                                                                                               | 635   | 2E-30   |
| CD001874              | 4.68E-03        | B73<F1=Mo17         | 1.5                      | 3                   | ns                                                                                                                                                                                                                                                                                                                                                                                                                                   |       |         |
| CB331044              | 4.69E-03        | Mo17<B73=F1         | 1.35                     | 11                  | >gb AAA72758.1  glutathione S-transferase                                                                                                                                                                                                                                                                                                                                                                                            | 214   | 3E-29   |
|                       |                 |                     |                          |                     | >gb AAA33470.1  glutathione S-transferase I gb AAA33469.1  glutathione S-transferase I prf 1303351A transferase,glutathione S                                                                                                                                                                                                                                                                                                        | 214   | 3E-29   |
|                       |                 |                     |                          |                     | >emb CAA29928.1  unnamed protein product [Zea mays] sp P12653 GSTF1 MAIZE Glutathione S-transferase I (GST-I) (GST-29) (GST class-phi)                                                                                                                                                                                                                                                                                               | 214   | 8E-29   |
|                       |                 |                     |                          |                     | >pdb 1BYE D Chain D, Glutathione S-Transferase I From Mais In Complex With Atrazine Glutathione Conjugate pdb 1BYE C Chain C, Glutathione S-Transferase I From Mais In Complex With Atrazine Glutathione Conjugate pdb 1BYE B Chain B, Glutathione S-Transferase I From Mais In Complex With Atrazine Glutathione Conjugate pdb 1BYE A Chain A, Glutathione S-Transferase I From Mais In Complex With Atrazine Glutathione Conjugate | 213   | 3E-28   |
|                       |                 |                     |                          |                     | >pdb 1AXD B Chain B, Structure Of Glutathione S-Transferase-I Bound With TheLigand Lactoyl glutathione pdb 1AXD A Chain A, Structure Of Glutathione S-Transferase-I Bound With The Ligand Lactoyl glutathione                                                                                                                                                                                                                        | 209   | 3E-28   |
| CD484958              | 4.69E-03        | F1=Mo17<B73         | 1.3                      | 9                   | ns                                                                                                                                                                                                                                                                                                                                                                                                                                   |       |         |
| BM074116              | 4.70E-03        | F1=Mo17<B73         | 1.65                     | 9                   | ns                                                                                                                                                                                                                                                                                                                                                                                                                                   |       |         |
| CB886468              | 4.71E-03        | Mo17<B73=F1         | 1.31                     | 10                  | ns                                                                                                                                                                                                                                                                                                                                                                                                                                   |       |         |

**Table 4. Microarray analysis results, mode of gene action classification, and BLAST annotation for the 1,367 ESTs identified as differentially expressed among genotypes (15% FDR)**

| GenBank accession no. | Overall P value | Significant pattern | Fold change <sup>†</sup> | Sector <sup>‡</sup> | BLAST annotation*                                                                                                                                                                                                                                                                                                                                                                                                                                                                                                                                                                                                                                                                                                                                                                                                                                                                                                                                                                                                                        | Score                           | E value                                   |
|-----------------------|-----------------|---------------------|--------------------------|---------------------|------------------------------------------------------------------------------------------------------------------------------------------------------------------------------------------------------------------------------------------------------------------------------------------------------------------------------------------------------------------------------------------------------------------------------------------------------------------------------------------------------------------------------------------------------------------------------------------------------------------------------------------------------------------------------------------------------------------------------------------------------------------------------------------------------------------------------------------------------------------------------------------------------------------------------------------------------------------------------------------------------------------------------------------|---------------------------------|-------------------------------------------|
| CD001354              | 4.71E-03        | F1=Mo17<B73         | 1.36                     | 9                   | ns                                                                                                                                                                                                                                                                                                                                                                                                                                                                                                                                                                                                                                                                                                                                                                                                                                                                                                                                                                                                                                       |                                 |                                           |
| CB251998              | 4.72E-03        | Mo17<B73=F1         | 1.33                     | 10                  | >gb AAL70108.1  putative aldehyde dehydrogenase MIS1 [Zea mays]<br>>gb AAL70109.1  putative aldehyde dehydrogenase WIS1 [Triticum aestivum]<br>>gb AAZ91463.1  delta-1-pyrroline-5-carboxylate dehydrogenase [Triticum turgidum]<br>>ref XP_475772.1  putative aldehyde dehydrogenase [Oryza sativa (japonica cultivar-group)] gb AAT39215.1  putative aldehyde dehydrogenase [Oryza sativa (japonica cultivar-group)]<br>>gb AAL70106.1  putative aldehyde dehydrogenase BIS1 [Hordeum vulgare]gb AAZ91461.1  delta-1-pyrroline-5-carboxylate dehydrogenase [Hordeum vulgare]<br>>ref XP_464088.1  putative cycloartenol synthase [Oryza sativa (japonica cultivar-group)] dbj BAD10254.1  putative cycloartenol synthase [Oryza sativa (japonica cultivar-group)]                                                                                                                                                                                                                                                                      | 549<br>551<br>551<br>513<br>551 | 8E-79<br>3E-73<br>9E-73<br>3E-72<br>3E-72 |
| DV621391              | 4.72E-03        | B73<Mo17            | 1.32                     | 3                   | >gb AAF03375.1  putative cycloartenol synthase [Oryza sativa]<br>>gb AAT38891.1  cycloartenol synthase [Avena strigosa]<br>>gb AAT38889.1  cycloartenol synthase [Avena longiglumis]<br>>gb AAT38890.1  cycloartenol synthase [Avena prostrata]                                                                                                                                                                                                                                                                                                                                                                                                                                                                                                                                                                                                                                                                                                                                                                                          | 759<br>757<br>759<br>759<br>759 | 4E-63<br>4E-63<br>5E-63<br>5E-63<br>9E-63 |
| CB381008              | 4.73E-03        | Mo17<B73=F1         | 1.34                     | 11                  | ns                                                                                                                                                                                                                                                                                                                                                                                                                                                                                                                                                                                                                                                                                                                                                                                                                                                                                                                                                                                                                                       |                                 |                                           |
| DV490694              | 4.73E-03        | F1=Mo17<B73         | 1.78                     | 9                   | >dbj BAD81765.1  Myb-like protein [Oryza sativa (japonica cultivar-group)]<br>>emb CAD22534.1  transcription factor myb [Oryza sativa]<br>>gb AAU44021.1  unknown protein [Oryza sativa (japonica cultivar-group)]<br>>gb AAZ20428.1  MYB4 [Malus x domestica]<br>>emb CAD98760.1  MYB transcription factor R3 type [Populus tremula x Populustremuloides]                                                                                                                                                                                                                                                                                                                                                                                                                                                                                                                                                                                                                                                                               | 584<br>499<br>473<br>571<br>530 | 5E-41<br>1E-39<br>2E-25<br>3E-8<br>1E-7   |
| CD568529              | 4.75E-03        | F1=Mo17<B73         | 1.24                     | 9                   | >emb CAB65537.1  Toc34-1 protein [Zea mays]<br>>emb CAB77551.1  Toc34-2 protein [Zea mays]<br>>emb CAA82196.1  chloroplast outer envelope protein 34 [Pisum sativum]sp Q41009 TOC34_PEA Translocase of chloroplast 34 (34 kDa chloroplast outer envelope protein) (GTP-binding protein OEP34) (GTP-binding protein IAP34) gb AAC25785.1  GTP-binding protein [Pisum sativum]<br>>ref NP_850768.1  OEP34 [Arabidopsis thaliana]ref NP_974732.1  OEP34 [Arabidopsis thaliana] ref NP_196119.1  OEP34 [Arabidopsis thaliana] dbj BAB11522.1  GTP-binding protein [Arabidopsis thaliana]<br>>emb CAC17699.1  atToc34 protein [Arabidopsis thaliana]sp Q38906 TOC34_ARATH Translocase of chloroplast 34 (34 kDa chloroplast outer envelope protein) (GTP-binding protein OEP34) (AtToc34) gb AAD09203.1  GTP-binding protein [Arabidopsis thaliana]                                                                                                                                                                                           | 326<br>326<br>310<br>313<br>313 | 1E-32<br>1E-30<br>9E-27<br>1E-25<br>1E-25 |
| BM074494              | 4.76E-03        | B73<F1=Mo17         | 1.27                     | 2                   | >gb AAL65396.1  putative aminotransferase [Oryza sativa]<br>>ref XP_473880.1  OSJNBa0008M17.4 [Oryza sativa (japonica cultivar-group)]emb CAE04333.2  OSJNBa0008M17.4 [Oryza sativa (japonica cultivar-group)] gb AAQ14479.1  putative aminotransferase [Oryza sativa]<br>>ref XP_473879.1  OSJNBa0008M17.3 [Oryza sativa (japonica cultivar-group)]emb CAE04332.2  OSJNBa0008M17.3 [Oryza sativa (japonica cultivar-group)]<br>>ref XP_480608.1  putative gamma-aminobutyrate transaminase subunit precursor isozyme3 [Oryza sativa (japonica cultivar-group)] dbj BAD11549.1  putative gamma-aminobutyrate transaminase subunit precursor isozyme 3 [Oryza sativa (japonica cultivar-group)] dbj BAD05337.1  putative gamma-aminobutyrate transaminase subunit precursor isozyme 3 [Oryza sativa (japonica cultivar-group)]<br>>ref XP_463843.1  putative 4-aminobutyrate aminotransferase [Oryza sativa (japonica cultivar-group)] dbj BAD07632.1  putative 4-aminobutyrate aminotransferase [Oryza sativa (japonica cultivar-group)] | 231<br>516<br>497<br>510<br>483 | 5E-37<br>5E-37<br>2E-36<br>2E-36<br>2E-35 |
| CB381312              | 4.76E-03        | B73<F1=Mo17         | 1.37                     | 3                   | >gb AAP80858.1  ribosomal protein L19 [Triticum aestivum]<br>>gb AAT76364.1  putative ribosomal protein L19 [Oryza sativa (japonica cultivar-group)] gb AAP05800.1  putative ribosomal protein L19 [Oryza sativa (japonica cultivar-group)]<br>>gb AAT08672.1  ribosomal protein L19 [Hyacinthus orientalis]<br>>gb AAR83877.1  60S ribosomal protein L19 [Capsicum annuum]<br>>gb ABC01909.1  60S ribosomal protein L19-like protein [Solanum tuberosum]                                                                                                                                                                                                                                                                                                                                                                                                                                                                                                                                                                                | 209<br>206<br>203<br>232<br>209 | 7E-46<br>7E-46<br>3E-44<br>4E-43<br>4E-43 |
| CD573072              | 4.77E-03        | Mo17<B73=F1         | 1.35                     | 10                  | >gb AAG34818.1  glutathione S-transferase GST 10 [Zea mays]<br>>gb AAG32477.1  putative glutathione S-transferase OsGSTF3 [Oryza sativa (japonica cultivar-group)]<br>>ref XP_470193.1  Putative glutathione S-transferase [Oryza sativa (japonica cultivar-group)] gb AAN05495.1  Putative glutathione S-transferase [Oryza sativa (japonica cultivar-group)]<br>>gb AAB65163.1  glutathione S-transferase, class-phi [Solanum commersonii]<br>>emb CA96431.1  glutathione S-transferase [Nicotiana plumbaginifolia]                                                                                                                                                                                                                                                                                                                                                                                                                                                                                                                    | 199<br>224<br>224<br>213<br>203 | 7E-87<br>4E-78<br>4E-78<br>3E-35<br>1E-34 |
| DV493710              | 4.79E-03        | B73=F1<Mo17         | 1.38                     | 4                   | >emb CAD23418.1  m5 [Zea mays]gb AAG43199.1  MADS box protein 1 [Zea mays]<br>>ref XP_468582.1  Putative MADS box-like protein [Oryza sativa (japonica cultivar-group)] gb AAS59820.1  MADS-box protein RMADS208 [Oryza sativa (japonica cultivar-group)] gb AAN74833.1  Putative MADS box-like protein [Oryza sativa (japonica cultivar-group)]<br>>gb AAQ01162.1  MADS box protein [Oryza sativa (japonica cultivar-group)]dbj BAA81886.1  MADS box-like protein [Oryza sativa (japonica cultivar-group)]<br>>gb AAM14668.1  ZAGL1 [Zea diploperennis]gb AAM14647.1  ZAGL1 [Zea mays subsp. parviglumis]                                                                                                                                                                                                                                                                                                                                                                                                                               | 151<br>230<br>230<br>60         | 9E-25<br>9E-25<br>9E-25<br>8E-15          |

**Table 4. Microarray analysis results, mode of gene action classification, and BLAST annotation for the 1,367 ESTs identified as differentially expressed among genotypes (15% FDR)**

| GenBank accession no. | Overall P value | Significant pattern | Fold change <sup>†</sup> | Sector <sup>‡</sup> | BLAST annotation*                                                                                                                                                                                                                                                                                                                                                                                                                                                                                                                                                                                                                                                                                                                                                                                                                                                    | Score     | E value        |
|-----------------------|-----------------|---------------------|--------------------------|---------------------|----------------------------------------------------------------------------------------------------------------------------------------------------------------------------------------------------------------------------------------------------------------------------------------------------------------------------------------------------------------------------------------------------------------------------------------------------------------------------------------------------------------------------------------------------------------------------------------------------------------------------------------------------------------------------------------------------------------------------------------------------------------------------------------------------------------------------------------------------------------------|-----------|----------------|
|                       |                 |                     |                          |                     | >gb AAM14667.1  ZAGL1 [Zea mays]gb AAM14666.1  ZAGL1 [Zea mays] gb AAM14665.1  ZAGL1 [Zea mays] gb AAM14664.1  ZAGL1 [Zea mays] gb AAM14663.1  ZAGL1 [Zea mays] gb AAM14662.1  ZAGL1 [Zea mays] gb AAM14661.1  ZAGL1 [Zea mays] gb AAM14660.1  ZAGL1 [Zea mays] gb AAM14659.1  ZAGL1 [Zea mays] gb AAM14658.1  ZAGL1 [Zea mays] gb AAM14657.1  ZAGL1 [Zea mays] gb AAM14656.1  ZAGL1 [Zea mays] gb AAM14655.1  ZAGL1 [Zea mays] gb AAM14653.1  ZAGL1 [Zea mays] gb AAM14652.1  ZAGL1 [Zea mays] gb AAM14650.1  ZAGL1 [Zea mays subsp. parviglumis] gb AAM14645.1  ZAGL1 [Zea mays subsp. parviglumis] gb AAM14642.1  ZAGL1 [Zea mays subsp. parviglumis] gb AAM14640.1  ZAGL1 [Zea mays subsp. parviglumis] gb AAM14639.1  ZAGL1 [Zea mays subsp. parviglumis] gb AAM14638.1  ZAGL1 [Zea mays subsp. parviglumis] gb AAM14637.1  ZAGL1 [Zea mays subsp. parviglumis] | 60        | 8E-15          |
| DV490950              | 4.79E-03        | B73<F1=Mo17         | 1.32                     | 3                   | >gb AAT75247.1  expressed protein [Oryza sativa (japonica cultivar-group)]                                                                                                                                                                                                                                                                                                                                                                                                                                                                                                                                                                                                                                                                                                                                                                                           | 474       | 5E-7           |
| BM333787              | 4.83E-03        | Mo17<B73=F1         | 2.7                      | 10                  | >ref NP_922019.1  hypothetical protein [Oryza sativa (japonica cultivar-group)]gb AAK21343.1  hypothetical protein [Oryza sativa (japonica cultivar-group)]<br>gb AAP54306.1  hypothetical protein LOC_Os10g34030 [Oryza sativa (japonica cultivar-group)]                                                                                                                                                                                                                                                                                                                                                                                                                                                                                                                                                                                                           | 396<br>99 | 1E-32<br>7E-12 |
| CB240083              | 4.85E-03        | Mo17<B73=F1         | 1.46                     | 11                  | >gb AAT08697.1  unknown [Hyacinthus orientalis]<br>>ref NP_029430.1  unknown protein [Arabidopsis thaliana]gb AAM16216.1  At2g28430/T1B3.5 [Arabidopsis thaliana] gb AAD20683.1  expressed protein [Arabidopsis thaliana] gb AAL25550.1  At2g28430/T1B3.5 [Arabidopsis thaliana]                                                                                                                                                                                                                                                                                                                                                                                                                                                                                                                                                                                     | 85        | 4E-11          |
|                       |                 |                     |                          |                     | >dbj BAD81998.1  putative NEW1 domain containing protein isoform [Oryza sativa(japonica cultivar-group)]                                                                                                                                                                                                                                                                                                                                                                                                                                                                                                                                                                                                                                                                                                                                                             | 424       | 2E-73          |
|                       |                 |                     |                          |                     | >ref XP_475303.1  'unknown protein contains, zinc finger DHHC domain' [Oryza sativa(japonica cultivar-group)] gb AAT58886.1  'unknown protein contains, zinc finger DHHC domain' [Oryza sativa (japonica cultivar-group)]                                                                                                                                                                                                                                                                                                                                                                                                                                                                                                                                                                                                                                            | 889       | 4E-73          |
|                       |                 |                     |                          |                     | >ref NP_194194.1  metal ion binding [Arabidopsis thaliana]emb CAB79373.1  putative protein [Arabidopsis thaliana] emb CAA23000.1  putative protein [Arabidopsis thaliana]                                                                                                                                                                                                                                                                                                                                                                                                                                                                                                                                                                                                                                                                                            | 374       | 4E-61          |
|                       |                 |                     |                          |                     | >ref XP_483525.1  putative DHHC-type zinc finger domain-containing protein [Oryzasativa (japonica cultivar-group)] dbj BAD13105.1  putative DHHC-type zinc finger domain-containing protein [Oryza sativa (japonica cultivar-group)] dbj BAD01220.1  putative DHHC-type zinc finger domain-containing protein [Oryza sativa (japonica cultivar-group)]                                                                                                                                                                                                                                                                                                                                                                                                                                                                                                               | 416       | 2E-52          |
|                       |                 |                     |                          |                     | >ref NP_199813.2  metal ion binding [Arabidopsis thaliana]gb AAM20317.1  unknown protein [Arabidopsis thaliana] gb AAL49807.1  unknown protein [Arabidopsis thaliana]                                                                                                                                                                                                                                                                                                                                                                                                                                                                                                                                                                                                                                                                                                | 407       | 4E-52          |
| CD001615              | 4.85E-03        | Mo17<B73=F1         | 1.26                     | 10                  | >ref NP_568778.1  oxidoreductase, acting on NADH or NADPH [Arabidopsis thaliana]gb AAL79599.1  AT5g52840/MXC20_6 [Arabidopsis thaliana] gb AAL06910.1  AT5g52840/MXC20_6 [Arabidopsis thaliana] dbj BAB10432.1  unnamed protein product [Arabidopsis thaliana] sp Q9FLX7 NUFM_ARATH Probable NADH-ubiquinone oxidoreductase 18 kDa subunit, mitochondrial precursor (Complex I-18Kd) (CI-18Kd)                                                                                                                                                                                                                                                                                                                                                                                                                                                                       | 169       | 4E-41          |
|                       |                 |                     |                          |                     | >gb AAL32032.1  NADH-ubiquinone oxidoreductase [Retama raetam]                                                                                                                                                                                                                                                                                                                                                                                                                                                                                                                                                                                                                                                                                                                                                                                                       | 153       | 1E-39          |
|                       |                 |                     |                          |                     | >ref NP_680745.1  unknown protein [Arabidopsis thaliana]                                                                                                                                                                                                                                                                                                                                                                                                                                                                                                                                                                                                                                                                                                                                                                                                             | 115       | 4E-8           |
|                       |                 |                     |                          |                     | >gb AAU44524.1  hypothetical protein AT4G28005 [Arabidopsis thaliana]                                                                                                                                                                                                                                                                                                                                                                                                                                                                                                                                                                                                                                                                                                                                                                                                | 112       | 5E-8           |
|                       |                 |                     |                          |                     | >ref XP_504293.1  hypothetical protein [Yarrowia lipolytica]emb CAG79892.1  unnamed protein product [Yarrowia lipolytica CLIB122]                                                                                                                                                                                                                                                                                                                                                                                                                                                                                                                                                                                                                                                                                                                                    | 146       | 1E-6           |
| DV491034              | 4.88E-03        | B73<F1=Mo17         | 1.67                     | 3                   | >dbj BAD87057.1  putative NADP-dependent malic protein [Oryza sativa (japonica cultivar-group)]                                                                                                                                                                                                                                                                                                                                                                                                                                                                                                                                                                                                                                                                                                                                                                      | 388       | 6E-15          |
|                       |                 |                     |                          |                     | >dbj BAD87056.1  putative NADP-dependent malic protein [Oryza sativa (japonica cultivar-group)]                                                                                                                                                                                                                                                                                                                                                                                                                                                                                                                                                                                                                                                                                                                                                                      | 496       | 6E-15          |
|                       |                 |                     |                          |                     | >dbj BAB20887.2  NADP dependent malic enzyme [Oryza sativa (japonica cultivar-group)]                                                                                                                                                                                                                                                                                                                                                                                                                                                                                                                                                                                                                                                                                                                                                                                | 593       | 6E-15          |
|                       |                 |                     |                          |                     | >ref NP_916713.1  P0022F10.12 [Oryza sativa (japonica cultivar-group)]                                                                                                                                                                                                                                                                                                                                                                                                                                                                                                                                                                                                                                                                                                                                                                                               | 593       | 6E-15          |
|                       |                 |                     |                          |                     | >gb AAF73006.1  NADP-dependent malic protein [Ricinus communis]                                                                                                                                                                                                                                                                                                                                                                                                                                                                                                                                                                                                                                                                                                                                                                                                      | 641       | 1E-12          |
| DV491071              | 4.91E-03        | F1=Mo17<B73         | 1.38                     | 9                   | >gb AAP80666.1  pyrophosphate-dependent phosphofructo-1-kinase [Triticum aestivum]                                                                                                                                                                                                                                                                                                                                                                                                                                                                                                                                                                                                                                                                                                                                                                                   | 130       | 3E-59          |
|                       |                 |                     |                          |                     | >ref XP_550650.1  putative pyrophosphate-dependent phosphofructo-1-kinase [Oryzasativa (japonica cultivar-group)] dbj BAD69066.1  putative pyrophosphate-dependent phosphofructo-1-kinase [Oryza sativa (japonica cultivar-group)] dbj BAD69330.1  putative pyrophosphate-dependent phosphofructo-1-kinase [Oryza sativa (japonica cultivar-group)]                                                                                                                                                                                                                                                                                                                                                                                                                                                                                                                  | 541       | 2E-57          |
|                       |                 |                     |                          |                     | >ref NP_568842.1  6-phosphofructokinase [Arabidopsis thaliana]gb AAK64113.1  putative pyrophosphate-dependent phosphofructo-1-kinase [Arabidopsis thaliana] gb AAK25917.1  putative pyrophosphate-dependent phosphofructo-1-kinase [Arabidopsis thaliana]                                                                                                                                                                                                                                                                                                                                                                                                                                                                                                                                                                                                            | 485       | 1E-45          |
|                       |                 |                     |                          |                     | >dbj BAB09881.1  pyrophosphate-dependent phosphofructo-1-kinase-like protein[Arabidopsis thaliana]                                                                                                                                                                                                                                                                                                                                                                                                                                                                                                                                                                                                                                                                                                                                                                   | 488       | 1E-45          |
|                       |                 |                     |                          |                     | >gb AAV44044.1  putative diphosphate-fructose-6-phosphate 1-phosphotransferase[Oryza sativa (japonica cultivar-group)] gb AAU44054.1  putative diphosphate-fructose-6-phosphate 1-phosphotransferase [Oryza sativa (japonica cultivar-group)]                                                                                                                                                                                                                                                                                                                                                                                                                                                                                                                                                                                                                        | 567       | 2E-43          |
| CB886256              | 4.95E-03        | B73<F1=Mo17         | 1.61                     | 3                   | >ref XP_467147.1  unknown protein [Oryza sativa (japonica cultivar-group)]dbj BAD25738.1  unknown protein [Oryza sativa (japonica cultivar-group)]<br>dbj BAD25775.1  unknown protein [Oryza sativa (japonica cultivar-group)]                                                                                                                                                                                                                                                                                                                                                                                                                                                                                                                                                                                                                                       | 283       | 8E-76          |
|                       |                 |                     |                          |                     | >gb AAM65994.1  unknown [Arabidopsis thaliana]                                                                                                                                                                                                                                                                                                                                                                                                                                                                                                                                                                                                                                                                                                                                                                                                                       | 293       | 1E-51          |
|                       |                 |                     |                          |                     | >dbj BAB02931.1  unnamed protein product [Arabidopsis thaliana]                                                                                                                                                                                                                                                                                                                                                                                                                                                                                                                                                                                                                                                                                                                                                                                                      | 330       | 1E-51          |
|                       |                 |                     |                          |                     | >ref NP_566746.1  unknown protein [Arabidopsis thaliana]                                                                                                                                                                                                                                                                                                                                                                                                                                                                                                                                                                                                                                                                                                                                                                                                             | 293       | 1E-51          |
|                       |                 |                     |                          |                     | >dbj BAC43550.1  unknown protein [Arabidopsis thaliana]                                                                                                                                                                                                                                                                                                                                                                                                                                                                                                                                                                                                                                                                                                                                                                                                              | 293       | 4E-51          |
| CB329476              | 5.03E-03        | Mo17<B73=F1         | 1.33                     | 10                  | >gb AAL76334.1  putative G-box binding protein [Oryza sativa]dbj BAD45657.1  G-box binding protein-like [Oryza sativa (japonica cultivar-group)]<br>gb AAB65433.1  HvB12D homolog [Oryza sativa]                                                                                                                                                                                                                                                                                                                                                                                                                                                                                                                                                                                                                                                                     | 89        | 4E-24          |
|                       |                 |                     |                          |                     | >emb CAA70936.1  B12Dg1 [Hordeum vulgare subsp. vulgare]emb CAA54065.1  HvB12D [Hordeum vulgare subsp. vulgare]                                                                                                                                                                                                                                                                                                                                                                                                                                                                                                                                                                                                                                                                                                                                                      | 87        | 5E-22          |



**Table 4. Microarray analysis results, mode of gene action classification, and BLAST annotation for the 1,367 ESTs identified as differentially expressed among genotypes (15% FDR)**

| GenBank accession no. | Overall P value | Significant pattern | Fold change <sup>‡</sup> | Sector <sup>‡</sup> | BLAST annotation*                                                                                                                                                                                                                                                                                                                                                                                                                                                                                                                                                                                                                                                               | Score | E value |
|-----------------------|-----------------|---------------------|--------------------------|---------------------|---------------------------------------------------------------------------------------------------------------------------------------------------------------------------------------------------------------------------------------------------------------------------------------------------------------------------------------------------------------------------------------------------------------------------------------------------------------------------------------------------------------------------------------------------------------------------------------------------------------------------------------------------------------------------------|-------|---------|
|                       |                 |                     |                          |                     | >gb AAD22104.1  B12D protein [Ipomoea batatas]                                                                                                                                                                                                                                                                                                                                                                                                                                                                                                                                                                                                                                  | 90    | 3E-18   |
|                       |                 |                     |                          |                     | >ref XP_477421.1  putative B12D protein [Oryza sativa (japonica cultivar-group)] dbj BAC84633.1  putative B12D protein [Oryza sativa (japonica cultivar-group)]                                                                                                                                                                                                                                                                                                                                                                                                                                                                                                                 | 98    | 2E-16   |
|                       |                 |                     |                          |                     | dbj BAD31625.1  putative B12D protein [Oryza sativa (japonica cultivar-group)]                                                                                                                                                                                                                                                                                                                                                                                                                                                                                                                                                                                                  |       |         |
|                       |                 |                     |                          |                     | >ref NP_190397.1  unknown protein [Arabidopsis thaliana] emb CAB51061.1  B12D-like protein [Arabidopsis thaliana]  gb AAL91215.1  B12D-like protein [Arabidopsis thaliana]  gb AAN65070.1  B12D-like protein [Arabidopsis thaliana]  pir T13003 hypothetical protein T24C20.20 - Arabidopsis thaliana                                                                                                                                                                                                                                                                                                                                                                           | 88    | 2E-15   |
| CD484470              | 5.06E-03        | Mo17<B73=F1         | 1.38                     | 11                  | >sp P23346 SODC5 MAIZE Superoxide dismutase [Cu-Zn] 4AP                                                                                                                                                                                                                                                                                                                                                                                                                                                                                                                                                                                                                         | 152   | 2E-66   |
|                       |                 |                     |                          |                     | >emb CAB57992.1  superoxide dismutase-4AP [Zea mays] sp P23345 SODC4 MAIZE Superoxide dismutase [Cu-Zn] 4A                                                                                                                                                                                                                                                                                                                                                                                                                                                                                                                                                                      | 152   | 1E-65   |
|                       |                 |                     |                          |                     | >emb CAB57993.1  superoxide dismutase-4A [Zea mays] gb AAB49913.1  superoxide dismutase 4A                                                                                                                                                                                                                                                                                                                                                                                                                                                                                                                                                                                      | 152   | 2E-64   |
|                       |                 |                     |                          |                     | >gb AAB49912.1  superoxide dismutase 4                                                                                                                                                                                                                                                                                                                                                                                                                                                                                                                                                                                                                                          | 124   | 7E-64   |
|                       |                 |                     |                          |                     | >sp P28757 SODC2_ORYSA Superoxide dismutase [Cu-Zn] 2gb AAC14465.1  cytosolic copper/zinc-superoxide dismutase [Oryza sativa]  dbj BAA00800.1  copper/zinc-superoxide dismutase [Oryza sativa (japonica cultivar-group)]                                                                                                                                                                                                                                                                                                                                                                                                                                                        | 152   | 1E-60   |
| BM333867              | 5.14E-03        | F1=Mo17<B73         | 1.37                     | 9                   | >ref NP_921492.1  putative epimerase/dehydratase [Oryza sativa (japonica cultivar-group)]  dbj BAD6930.1  GDP-mannose-3",5"-epimerase [Oryza sativa (japonica cultivar-group)]  gb AAM08784.1  Putative epimerase/dehydratase [Oryza sativa]                                                                                                                                                                                                                                                                                                                                                                                                                                    | 378   | 2E-59   |
|                       |                 |                     |                          |                     | >gb ABA94522.1  NAD dependent epimerase/dehydratase family [Oryza sativa (japonica cultivar-group)]                                                                                                                                                                                                                                                                                                                                                                                                                                                                                                                                                                             | 371   | 7E-56   |
|                       |                 |                     |                          |                     | >ref NP_198236.1  GDP-mannose 3,5-epimerase/ catalytic [Arabidopsis thaliana] gb AAM51587.1  AT5g28840/F7P1_20 [Arabidopsis thaliana]  gb AAL15324.1  AT5g28840/F7P1_20 [Arabidopsis thaliana]  gb AAL15291.1  AT5g28840/F7P1_20 [Arabidopsis thaliana]  sp Q93VR3 GMANE_ARATH GDP-mannose 3,5-epimerase (GDP-Man 3,5-epimerase)                                                                                                                                                                                                                                                                                                                                                | 377   | 2E-53   |
|                       |                 |                     |                          |                     | >pdb 2C5E B Chain B, Gdp-Mannose-3', 5' -Epimerase (Arabidopsis Thaliana),K217a, With Gdp-Alpha-D-Mannose Bound In The Active Site. pdb 2C5E A Chain A, Gdp-Mannose-3', 5' -Epimerase (Arabidopsis Thaliana), K217a, With Gdp-Alpha-D-Mannose Bound In The Active Site.                                                                                                                                                                                                                                                                                                                                                                                                         | 379   | 2E-53   |
|                       |                 |                     |                          |                     | >pdb 2C5A B Chain B, Gdp-Mannose-3', 5' -Epimerase (Arabidopsis Thaliana), Y174f, With Gdp-Beta-L-Galactose Bound In The Active Site  pdb 2C5A A Chain A, Gdp-Mannose-3', 5' -Epimerase (Arabidopsis Thaliana), Y174f, With Gdp-Beta-L-Galactose Bound In The Active Site                                                                                                                                                                                                                                                                                                                                                                                                       | 379   | 2E-53   |
| CB351719              | 5.22E-03        | F1=Mo17<B73         | 1.36                     | 9                   | >ref XP_506504.1  PREDICTED P0524G08.101 gene product [Oryza sativa (japonica cultivar-group)]  ref XP_479288.1  unknown protein [Oryza sativa (japonica cultivar-group)]  dbj BAD31263.1  unknown protein [Oryza sativa (japonica cultivar-group)]  dbj BAC16465.1  unknown protein [Oryza sativa (japonica cultivar-group)]                                                                                                                                                                                                                                                                                                                                                   | 131   | 9E-30   |
|                       |                 |                     |                          |                     | >ref NP_566416.1  catalytic/ oxidoreductase, acting on NADH or NADPH [Arabidopsis thaliana]  gb AAL47381.1  unknown protein [Arabidopsis thaliana]  gb AAK96767.1  unknown protein [Arabidopsis thaliana]  gb AAG51074.1  unknown protein; 35018-33933 [Arabidopsis thaliana]  dbj BAB03135.1  unnamed protein product [Arabidopsis thaliana]                                                                                                                                                                                                                                                                                                                                   | 133   | 8E-24   |
| BM072898              | 5.22E-03        | Mo17<B73=F1         | 1.36                     | 10                  | >ref NP_910584.1  EST AU082567(S21715) corresponds to a region of the predicted gene.~Similar to S.tuberosum ubiquinol cytochrome c reductase. (X79275) [Oryza sativa (japonica cultivar-group)]  ref NP_910574.1  EST AU082567(S21715) corresponds to a region of the predicted gene.~Similar to S.tuberosum ubiquinol-cytochrome c reductase. (X79275) [Oryza sativa (japonica cultivar-group)]  dbj BAA95831.1  putative ubiquinol-cytochrome C reductase complex ubiquinone-binding protein [Oryza sativa (japonica cultivar-group)]  dbj BAA95821.1  putative ubiquinol-cytochrome C reductase complex ubiquinone-binding protein [Oryza sativa (japonica cultivar-group)] | 72    | 4E-33   |
|                       |                 |                     |                          |                     | >ref NP_187697.1  ubiquinol-cytochrome-c reductase [Arabidopsis thaliana] gb AAF19563.1  putative ubiquinol-cytochrome C reductase complex ubiquinone-binding protein (QP-C) [Arabidopsis thaliana]  gb AAN17451.1  putative ubiquinol-cytochrome C reductase complex ubiquinone-binding protein (QP-C) [Arabidopsis thaliana]  gb AAP21315.1  At3g10860 [Arabidopsis thaliana]  gb AAM64437.1  putative ubiquinol-cytochrome C reductase complex ubiquinone-binding protein (QP-C) [Arabidopsis thaliana]                                                                                                                                                                      | 72    | 2E-27   |
|                       |                 |                     |                          |                     | >ref NP_196156.1  ubiquinol-cytochrome-c reductase [Arabidopsis thaliana] gb AAQ65099.1  At5g05370 [Arabidopsis thaliana]  dbj BAB09980.1  ubiquinol-cytochrome C reductase complex ubiquinone-binding protein [Arabidopsis thaliana]                                                                                                                                                                                                                                                                                                                                                                                                                                           | 72    | 6E-26   |
|                       |                 |                     |                          |                     | >emb CA55862.1  ubiquinol-cytochrome c reductase [Solanum tuberosum] sp P46269 UCRQ_SOLTU Ubiquinol-cytochrome c reductase complex ubiquinone-binding protein QP-C (Ubiquinol-cytochrome c reductase complex 8.2 kDa protein)  prf 2107179A cytochrome c oxidase:SUBUNIT=8.2kD                                                                                                                                                                                                                                                                                                                                                                                                  | 72    | 3E-25   |
|                       |                 |                     |                          |                     | >gb AAP80673.1  cytochrome reductase [Triticum aestivum]                                                                                                                                                                                                                                                                                                                                                                                                                                                                                                                                                                                                                        | 115   | 2E-11   |
| CB816343              | 5.23E-03        | Mo17<B73=F1         | 1.31                     | 10                  | >gb AAO72563.1  elongation factor 1 gamma-like protein [Oryza sativa (japonica cultivar-group)]                                                                                                                                                                                                                                                                                                                                                                                                                                                                                                                                                                                 | 413   | 2E-90   |
|                       |                 |                     |                          |                     | >dbj BAD61932.1  putative elongation factor 1 gamma [Oryza sativa (japonica cultivar-group)]  dbj BAD61828.1  putative elongation factor 1 gamma [Oryza sativa (japonica cultivar-group)]                                                                                                                                                                                                                                                                                                                                                                                                                                                                                       | 416   | 2E-90   |
|                       |                 |                     |                          |                     | >ref XP_464690.1  Elongation factor 1-gamma [Oryza sativa (japonica cultivar-group)] dbj BAD17615.1  Elongation factor 1-gamma [Oryza sativa (japonica cultivar-group)]  sp Q9ZRI7 EF1G ORYSA Elongation factor 1-gamma (EF-1-gamma) (eEF-1B gamma)  dbj BAA34206.1  elongation factor 1B gamma [Oryza sativa (japonica cultivar-group)]                                                                                                                                                                                                                                                                                                                                        | 418   | 2E-89   |
|                       |                 |                     |                          |                     | >gb AAO72574.1  elongation factor 1 gamma-like protein [Oryza sativa (japonica cultivar-group)]                                                                                                                                                                                                                                                                                                                                                                                                                                                                                                                                                                                 | 409   | 3E-89   |
|                       |                 |                     |                          |                     | >ref XP_464689.1  putative elongation factor 1-gamma [Oryza sativa (japonica cultivar-group)]  dbj BAD17614.1  putative elongation factor 1-gamma [Oryza sativa (japonica cultivar-group)]                                                                                                                                                                                                                                                                                                                                                                                                                                                                                      | 414   | 3E-89   |
| CB605343              | 5.29E-03        | Mo17<B73=F1         | 1.28                     | 11                  | >gb AAU44051.1  unknown protein [Oryza sativa (japonica cultivar-group)]                                                                                                                                                                                                                                                                                                                                                                                                                                                                                                                                                                                                        | 132   | 2E-35   |
|                       |                 |                     |                          |                     | >ref NP_196020.1  unknown protein [Arabidopsis thaliana] emb CAB85520.1  putative protein [Arabidopsis thaliana]                                                                                                                                                                                                                                                                                                                                                                                                                                                                                                                                                                | 116   | 6E-16   |
|                       |                 |                     |                          |                     | >gb AAM63612.1  unknown [Arabidopsis thaliana]                                                                                                                                                                                                                                                                                                                                                                                                                                                                                                                                                                                                                                  | 116   | 7E-16   |
| BM078832              | 5.30E-03        | B73<F1=Mo17         | 1.37                     | 2                   | >dbj BAD87534.1  putative beta-N-acetylhexosaminidase [Oryza sativa (japonica cultivar-group)]                                                                                                                                                                                                                                                                                                                                                                                                                                                                                                                                                                                  | 526   | 2E-82   |
|                       |                 |                     |                          |                     | >ref NP_915111.1  beta-N-acetylhexosaminidase-like protein [Oryza sativa (japonica cultivar-group)]                                                                                                                                                                                                                                                                                                                                                                                                                                                                                                                                                                             | 496   | 2E-82   |

**Table 4. Microarray analysis results, mode of gene action classification, and BLAST annotation for the 1,367 ESTs identified as differentially expressed among genotypes (15% FDR)**

| GenBank accession no. | Overall P value | Significant pattern | Fold change <sup>†</sup> | Sector <sup>‡</sup> | BLAST annotation*                                                                                                                                                                                                                                                                                                                                                                                                                                                          | Score | E value |
|-----------------------|-----------------|---------------------|--------------------------|---------------------|----------------------------------------------------------------------------------------------------------------------------------------------------------------------------------------------------------------------------------------------------------------------------------------------------------------------------------------------------------------------------------------------------------------------------------------------------------------------------|-------|---------|
|                       |                 |                     |                          |                     | >gb AAV32135.1  putative beta-N-acetylhexosaminidase [Oryza sativa (japonica cultivar-group)]                                                                                                                                                                                                                                                                                                                                                                              | 531   | 2E-79   |
|                       |                 |                     |                          |                     | >gb AAT77374.1  putative beta-N-acetylhexosaminidase [Oryza sativa (japonica cultivar-group)]                                                                                                                                                                                                                                                                                                                                                                              | 527   | 2E-79   |
|                       |                 |                     |                          |                     | >ref NP_176737.2  beta-N-acetylhexosaminidase [Arabidopsis thaliana]gb AAN33206.1  At1g65600/F5114_13 [Arabidopsis thaliana] gb AAM91092.1  At1g65600/F5114_13 [Arabidopsis thaliana]                                                                                                                                                                                                                                                                                      | 535   | 1E-71   |
| CD001179              | 5.34E-03        | Mo17<B73            | 1.24                     | 9                   | >ref XP_474269.1  OSJNBa0043A12.6 [Oryza sativa (japonica cultivar-group)]emb CAE02801.1  OSJNBa0043A12.6 [Oryza sativa (japonica cultivar-group)]                                                                                                                                                                                                                                                                                                                         | 148   | 1E-65   |
|                       |                 |                     |                          |                     | >gb AAU82109.1  ubiquitin-conjugating enzyme [Triticum aestivum]                                                                                                                                                                                                                                                                                                                                                                                                           | 148   | 7E-65   |
|                       |                 |                     |                          |                     | >gb AAF24583.1  F22C12.2 [Arabidopsis thaliana]                                                                                                                                                                                                                                                                                                                                                                                                                            | 146   | 7E-64   |
|                       |                 |                     |                          |                     | >ref NP_001031228.1  ubiquitin conjugating enzyme/ ubiquitin-like activating enzyme [Arabidopsis thaliana] ref NP_564828.1  ubiquitin conjugating enzyme/ ubiquitin-like activating enzyme [Arabidopsis thaliana] gb AAM91500.1  At1g64230/F22C12_17 [Arabidopsis thaliana] gb AAM11574.1  ubiquitin conjugating enzyme UBC9A [Arabidopsis thaliana] gb AAK60309.1  At1g64230/F22C12_17 [Arabidopsis thaliana] gb AAY44867.1  ubiquitinating enzyme [Arabidopsis thaliana] | 148   | 7E-64   |
|                       |                 |                     |                          |                     | >gb AAB88617.1  ubiquitin conjugating enzyme [Zea mays]                                                                                                                                                                                                                                                                                                                                                                                                                    | 148   | 7E-64   |
| CB604393              | 5.35E-03        | B73<Mo17            | 1.34                     | 3                   | >emb CAE52515.1  alpha tubulin [Setaria viridis]                                                                                                                                                                                                                                                                                                                                                                                                                           | 451   | 1E-72   |
|                       |                 |                     |                          |                     | >emb CAA33733.1  alpha2-tubulin [Zea mays]sp P14641 TBA2 MAIZE Tubulin alpha-2 chain (Alpha-2 tubulin)                                                                                                                                                                                                                                                                                                                                                                     | 451   | 1E-72   |
|                       |                 |                     |                          |                     | >emb CAA33734.1  alpha1-tubulin [Zea mays]sp P14640 TBA1 MAIZE Tubulin alpha-1 chain (Alpha-1 tubulin)                                                                                                                                                                                                                                                                                                                                                                     | 451   | 1E-72   |
|                       |                 |                     |                          |                     | >emb CAA10663.1  alpha-tubulin 3 [Hordeum vulgare subsp. vulgare]sp Q9ZRR5 TBA3 HORVU Tubulin alpha-3 chain                                                                                                                                                                                                                                                                                                                                                                | 451   | 1E-72   |
|                       |                 |                     |                          |                     | >emb CAA06619.1  alpha-tubulin 1 [Eleusine indica]                                                                                                                                                                                                                                                                                                                                                                                                                         | 451   | 1E-72   |
| CB604474              | 5.39E-03        | Mo17<B73=F1         | 1.23                     | 10                  | >dbj BAD52963.1  putative 40S ribosomal protein S4 [Oryza sativa (japonica cultivar-group)]                                                                                                                                                                                                                                                                                                                                                                                | 265   | 1E-31   |
|                       |                 |                     |                          |                     | >sp O22424 RS4 MAIZE 40S ribosomal protein S4gb AAB66899.1  ribosomal protein S4 type I [Zea mays]                                                                                                                                                                                                                                                                                                                                                                         | 265   | 1E-31   |
|                       |                 |                     |                          |                     | >dbj BAD28085.1  putative ribosomal protein S4 [Oryza sativa (japonica cultivar-group)]                                                                                                                                                                                                                                                                                                                                                                                    | 265   | 2E-31   |
|                       |                 |                     |                          |                     | >gb AAB67831.1  ribosomal protein S4 [Zea mays]                                                                                                                                                                                                                                                                                                                                                                                                                            | 265   | 3E-31   |
|                       |                 |                     |                          |                     | >emb CAA55882.1  ribosomal protein, small subunit 4e (RS4e) [Gossypium hirsutum]sp P46299 RS4 GOSHI 40S ribosomal protein S4                                                                                                                                                                                                                                                                                                                                               | 262   | 8E-31   |
|                       |                 |                     |                          |                     | >ref XP_467668.1  RING zinc finger protein-like [Oryza sativa (japonica cultivar-group)] dbj BAD15897.1  RING zinc finger protein-like [Oryza sativa (japonica cultivar-group)]                                                                                                                                                                                                                                                                                            | 180   | 6E-48   |
| DV621173              | 5.40E-03        | Mo17<B73=F1         | 1.44                     | 10                  | >ref NP_176974.1  protein binding / ubiquitin-protein ligase/ zinc ion binding [Arabidopsis thaliana] gb AAG52017.1  putative RING zinc finger protein; 27623-28978 [Arabidopsis thaliana]                                                                                                                                                                                                                                                                                 | 343   | 3E-31   |
|                       |                 |                     |                          |                     | >gb AAM61051.1  putative RING zinc finger protein [Arabidopsis thaliana]                                                                                                                                                                                                                                                                                                                                                                                                   | 343   | 3E-31   |
|                       |                 |                     |                          |                     | >ref NP_849924.1  RIE1 (RING-FINGER PROTEIN FOR EMBRYOGENESIS); ubiquitin-proteinligase/ zinc ion binding [Arabidopsis thaliana] gb AAN87884.1  RES protein [Arabidopsis thaliana]                                                                                                                                                                                                                                                                                         | 359   | 6E-29   |
|                       |                 |                     |                          |                     | >ref XP_473541.1  OSJNBb0032E06.5 [Oryza sativa (japonica cultivar-group)]emb CAE02249.2  OSJNBb0032E06.5 [Oryza sativa (japonica cultivar-group)]                                                                                                                                                                                                                                                                                                                         | 324   | 8E-26   |
| BM073183              | 5.41E-03        | Mo17<B73=F1         | 2.5                      | 10                  | >ref NP_922709.1  putative ethylene-forming enzyme [Oryza sativa (japonica cultivar-group)] gb AAL79785.1  putative ethylene-forming enzyme [Oryza sativa]                                                                                                                                                                                                                                                                                                                 | 281   | 8E-21   |
|                       |                 |                     |                          |                     | >ref NP_922706.1  putative ethylene-forming enzyme [Oryza sativa (japonica cultivar-group)] gb AAL79792.1  putative ethylene-forming enzyme [Oryza sativa]                                                                                                                                                                                                                                                                                                                 | 348   | 8E-21   |
|                       |                 |                     |                          |                     | gb AAP54993.1  ethylene-forming enzyme, putative [Oryza sativa (japonica cultivar-group)]                                                                                                                                                                                                                                                                                                                                                                                  |       |         |
|                       |                 |                     |                          |                     | >ref NP_922703.1  putative ethylene-forming enzyme [Oryza sativa (japonica cultivar-group)] gb AAK55454.1  putative dioxygenase [Oryza sativa (japonica cultivar-group)]                                                                                                                                                                                                                                                                                                   | 357   | 1E-20   |
|                       |                 |                     |                          |                     | gb AAL79801.1  putative ethylene-forming enzyme [Oryza sativa] gb AAP54990.1  dioxygenase, putative [Oryza sativa (japonica cultivar-group)]                                                                                                                                                                                                                                                                                                                               | 331   | 1E-20   |
|                       |                 |                     |                          |                     | >gb ABB47977.1  dioxygenase, putative [Oryza sativa (japonica cultivar-group)]                                                                                                                                                                                                                                                                                                                                                                                             |       |         |
|                       |                 |                     |                          |                     | >ref NP_922700.1  putative dioxygenase [Oryza sativa (japonica cultivar-group)]gb AAK55463.1  putative dioxygenase [Oryza sativa (japonica cultivar-group)]                                                                                                                                                                                                                                                                                                                | 368   | 2E-20   |
|                       |                 |                     |                          |                     | gb AAP54987.1  dioxygenase, putative [Oryza sativa (japonica cultivar-group)]                                                                                                                                                                                                                                                                                                                                                                                              |       |         |
|                       |                 |                     |                          |                     | >ref XP_493825.1  similar to Aquifex aeolicus section 65 of 109 of the complete genome; hypothetical protein. (AE000733) [Oryza sativa (japonica cultivar-group)]                                                                                                                                                                                                                                                                                                          |       |         |
|                       |                 |                     |                          |                     | gb AAO72591.1  unknown [Oryza sativa (japonica cultivar-group)] dbj BA85416.1  similar to Aquifex aeolicus section 65 of 109 of the complete genome; hypothetical protein. (AE000733) [Oryza sativa (japonica cultivar-group)]                                                                                                                                                                                                                                             | 1413  | 6E-79   |
| CB331835              | 5.42E-03        | F1=Mo17<B73         | 1.48                     | 9                   | >gb AAM22714.1  Unknown protein [Oryza sativa (japonica cultivar-group)]                                                                                                                                                                                                                                                                                                                                                                                                   | 162   | 5E-64   |
|                       |                 |                     |                          |                     | >ref NP_001032157.1  ATP binding / nucleoside-triphosphatase/ nucleotide binding [Arabidopsis thaliana] gb AAU29477.1  At5g66005 [Arabidopsis thaliana]                                                                                                                                                                                                                                                                                                                    | 192   | 8E-62   |
|                       |                 |                     |                          |                     | gb AAT41788.1  At5g66005 [Arabidopsis thaliana] dbj BAD95397.1  hypothetical protein [Arabidopsis thaliana]                                                                                                                                                                                                                                                                                                                                                                | 164   | 5E-52   |
|                       |                 |                     |                          |                     | >ref NP_974998.1  ATP binding / nucleoside-triphosphatase/ nucleotide binding [Arabidopsis thaliana]                                                                                                                                                                                                                                                                                                                                                                       | 147   | 2E-44   |
|                       |                 |                     |                          |                     | >ref NP_974997.1  ATP binding [Arabidopsis thaliana]                                                                                                                                                                                                                                                                                                                                                                                                                       |       |         |
| CAB29409              | 5.42E-03        | Mo17<F1             | 1.41                     | 11                  | >sp P23346 SODC5 MAIZE Superoxide dismutase [Cu-Zn] 4AP                                                                                                                                                                                                                                                                                                                                                                                                                    | 152   | 3E-76   |
|                       |                 |                     |                          |                     | >emb CAB57992.1  superoxide dismutase-4AP [Zea mays]sp P23345 SODC4 MAIZE Superoxide dismutase [Cu-Zn] 4A                                                                                                                                                                                                                                                                                                                                                                  | 152   | 8E-76   |
|                       |                 |                     |                          |                     | >emb CAB57993.1  superoxide dismutase-4A [Zea mays]gb AAB49913.1  superoxide dismutase 4A                                                                                                                                                                                                                                                                                                                                                                                  | 152   | 3E-74   |
|                       |                 |                     |                          |                     | >sp P28757 SODC2_ORYSA Superoxide dismutase [Cu-Zn] 2gb AAC14465.1  cytosolic copper/zinc-superoxide dismutase [Oryza sativa] dbj BAA00800.1  copper/zinc-superoxide dismutase [Oryza sativa (japonica cultivar-group)]                                                                                                                                                                                                                                                    | 152   | 4E-71   |

**Table 4. Microarray analysis results, mode of gene action classification, and BLAST annotation for the 1,367 ESTs identified as differentially expressed among genotypes (15% FDR)**

| GenBank accession no. | Overall P value | Significant pattern | Fold change <sup>†</sup> | Sector <sup>‡</sup> | BLAST annotation*                                                                                                                                                                                                                                                                                                                                                                                                                                                                                                                                                                                                                                                                                                                                                                                                                                                   | Score                           | E value                                   |
|-----------------------|-----------------|---------------------|--------------------------|---------------------|---------------------------------------------------------------------------------------------------------------------------------------------------------------------------------------------------------------------------------------------------------------------------------------------------------------------------------------------------------------------------------------------------------------------------------------------------------------------------------------------------------------------------------------------------------------------------------------------------------------------------------------------------------------------------------------------------------------------------------------------------------------------------------------------------------------------------------------------------------------------|---------------------------------|-------------------------------------------|
|                       |                 |                     |                          |                     | >gb AAV56345.1  cytoplasmic copper/zinc-superoxide dismutase [Oryza sativa (indica cultivar-group)] sp P28756 SODC1_ORYSA Superoxide dismutase [Cu-Zn] 1 gb AAC14464.1  cytosolic copper/zinc-superoxide dismutase [Oryza sativa] dbj BAA00799.1  copper/zinc-superoxide dismutase [Oryza sativa (japonica cultivar-group)] prf 2111424A Cu/Zn superoxide dismutase                                                                                                                                                                                                                                                                                                                                                                                                                                                                                                 | 152                             | 5E-71                                     |
| DV621635              | 5.42E-03        | B73=F1<Mo17         | 1.56                     | 4                   | >ref XP_467545.1  putative SNF5 homolog BSH (bsh) [Oryza sativa (japonica cultivar-group)] dbj BAD13031.1  putative SNF5 homolog BSH (bsh) [Oryza sativa (japonica cultivar-group)]                                                                                                                                                                                                                                                                                                                                                                                                                                                                                                                                                                                                                                                                                 | 171                             | 4E-11                                     |
| CB833653              | 5.42E-03        | B73<F1=Mo17         | 1.34                     | 3                   | >ref NP_564283.1  unknown protein [Arabidopsis thaliana]gb AAK62382.1  Unknown protein [Arabidopsis thaliana] dbj BAC43139.1  unknown protein [Arabidopsis thaliana] gb AAN65056.1  Unknown protein [Arabidopsis thaliana]                                                                                                                                                                                                                                                                                                                                                                                                                                                                                                                                                                                                                                          | 81                              | 3E-9                                      |
| BM336730              | 5.45E-03        | F1=Mo17<B73         | 4.18                     | 9                   | >gb ABA98228.1  hypothetical protein LOC_Os12g29340 [Oryza sativa (japonica cultivar-group)]<br>ns                                                                                                                                                                                                                                                                                                                                                                                                                                                                                                                                                                                                                                                                                                                                                                  | 68                              | 8E-6                                      |
| CD001350              | 5.45E-03        | B73=Mo17<F1         | 1.24                     | 12                  | >gb AAM95942.1  nucleosome/chromatin assembly factor group D protein [Zea mays]emb CAA41220.1  high mobility group protein [Zea mays] emb CAB46752.1  HMGa protein [Zea mays] sp P27347 MNB1B MAIZE DNA-binding protein MNB1B (HMG1-like protein)<br>>emb CAA46876.1  DNA-binding protein [Zea mays]pir T03640 high mobility group protein MNB1b - maize (fragment)<br>>gb AAP21609.1  HMGB1 [Oryza sativa (indica cultivar-group)]gb AAN28722.1  HMG1 protein [Oryza sativa (indica cultivar-group)] dbj BAD61823.1  HMGB1 [Oryza sativa (japonica cultivar-group)] gb AAC78104.1  high mobility group protein [Oryza sativa]<br>>emb CAA77641.1  high mobility group protein [Triticum aestivum]sp P40621 HMGL WHEAT HMG1/2-like protein<br>>emb CAA90679.1  HMG1/2-like protein [Hordeum vulgare subsp. vulgare]                                                 | 157<br>168<br>157<br>161<br>160 | 7E-12<br>7E-12<br>1E-10<br>5E-10<br>1E-9  |
| CD661920              | 5.48E-03        | B73=F1<Mo17         | 1.3                      | 4                   | >gb AAF13094.1  unknown protein [Arabidopsis thaliana]gb AAF21186.1  unknown protein [Arabidopsis thaliana]<br>>ref NP_566319.1  unknown protein [Arabidopsis thaliana]ref NP_850538.1  unknown protein [Arabidopsis thaliana] gb AAL47395.1  unknown protein [Arabidopsis thaliana] gb AAL16180.1  At3g07760/F17A17.10 [Arabidopsis thaliana] gb AAK96782.1  Unknown protein [Arabidopsis thaliana] gb AAM66036.1  unknown [Arabidopsis thaliana]<br>>gb ABA99120.1  AC009176 putative heat-shock protein [Oryza sativa (japonica cultivar-group)]<br>>ref XP_786852.1  PREDICTED: similar to SH3/ankyrin domain gene 2 [Strongylocentrotus purpuratus]                                                                                                                                                                                                            | 196<br>125<br>1210<br>1038      | 3E-58<br>3E-58<br>2E-41<br>5E-6           |
| DV490651              | 5.49E-03        | B73=F1<Mo17         | 1.5                      | 4                   | ns                                                                                                                                                                                                                                                                                                                                                                                                                                                                                                                                                                                                                                                                                                                                                                                                                                                                  |                                 |                                           |
| BM332447              | 5.50E-03        | Mo17<B73=F1         | 1.84                     | 10                  | ns                                                                                                                                                                                                                                                                                                                                                                                                                                                                                                                                                                                                                                                                                                                                                                                                                                                                  |                                 |                                           |
| CB886274              | 5.52E-03        | Mo17<B73=F1         | 1.32                     | 11                  | >sp P23346 SODC5 MAIZE Superoxide dismutase [Cu-Zn] 4AP<br>>emb CAB57992.1  superoxide dismutase-4AP [Zea mays]sp P23345 SODC4 MAIZE Superoxide dismutase [Cu-Zn] 4A<br>>emb CAB57993.1  superoxide dismutase-4A [Zea mays]gb AAB49913.1  superoxide dismutase 4A<br>>sp P28757 SODC2_ORYSA Superoxide dismutase [Cu-Zn] 2gb AAC14465.1  cytosolic copper/zinc-superoxide dismutase [Oryza sativa] dbj BAA00800.1  copper/zinc-superoxide dismutase [Oryza sativa (japonica cultivar-group)]<br>>gb AAV56345.1  cytoplasmic copper/zinc-superoxide dismutase [Oryza sativa (indica cultivar-group)] sp P28756 SODC1_ORYSA Superoxide dismutase [Cu-Zn] 1 gb AAC14464.1  cytosolic copper/zinc-superoxide dismutase [Oryza sativa] dbj BAA00799.1  copper/zinc-superoxide dismutase [Oryza sativa (japonica cultivar-group)] prf 2111424A Cu/Zn superoxide dismutase | 152<br>152<br>152<br>152        | 4E-82<br>3E-81<br>5E-80<br>7E-76          |
| CB605284              | 5.52E-03        | B73<Mo17            | 1.34                     | 4                   | >ref XP_474386.1  OSJNBb0017I01.27 [Oryza sativa (japonica cultivar-group)]emb CAE03422.1  OSJNBa0032F06.5 [Oryza sativa (japonica cultivar-group)] emb CAE05747.1  OSJNBb0017I01.27 [Oryza sativa (japonica cultivar-group)]<br>>ref XP_474387.1  OSJNBa0032F06.8 [Oryza sativa (japonica cultivar-group)]emb CAE03425.1  OSJNBa0032F06.8 [Oryza sativa (japonica cultivar-group)]<br>>dbj BAB02367.1  unnamed protein product [Arabidopsis thaliana]<br>>ref NP_566511.1  unknown protein [Arabidopsis thaliana]gb AAK76591.1  unknown protein [Arabidopsis thaliana] gb AAN71973.1  unknown protein [Arabidopsis thaliana]<br>>gb AAF35404.1  hypothetical protein [Arabidopsis thaliana]                                                                                                                                                                        | 711<br>711<br>697<br>700<br>722 | 3E-38<br>8E-37<br>2E-28<br>2E-28<br>4E-25 |
| CB604523              | 5.55E-03        | F1=Mo17<B73         | 1.67                     | 9                   | ns                                                                                                                                                                                                                                                                                                                                                                                                                                                                                                                                                                                                                                                                                                                                                                                                                                                                  |                                 |                                           |
| CB411042              | 5.57E-03        | Mo17<B73=F1         | 1.27                     | 11                  | >emb CAA64683.1  osr40c1 [Oryza sativa]<br>>ref NP_912421.1  Putative r40c1 protein - rice [Oryza sativa (japonica cultivar-group)] gb AAN64997.1  Putative r40c1 protein - rice [Oryza sativa (japonica cultivar-group)]<br>>ref XP_479572.1  putative r40c2 protein [Oryza sativa (japonica cultivar-group)]dbj BAC83805.1  putative r40c2 protein [Oryza sativa (japonica cultivar-group)]<br>>ref XP_479571.1  r40g2 protein [Oryza sativa (japonica cultivar-group)]dbj BAC83804.1  r40g2 protein [Oryza sativa (japonica cultivar-group)]<br>>emb CAA70174.1  osr40g2 [Oryza sativa (indica cultivar-group)]                                                                                                                                                                                                                                                  | 348<br>373<br>285<br>343<br>343 | 7E-84<br>7E-84<br>5E-74<br>5E-74<br>8E-72 |
| DV621595              | 5.59E-03        | B73<Mo17            | 1.4                      | 4                   | >gb AAW56447.1  putative methyl-binding domain protein MBD115 [Zea mays]<br>>gb AAM93219.1  methyl binding domain protein MBD109 [Zea mays]                                                                                                                                                                                                                                                                                                                                                                                                                                                                                                                                                                                                                                                                                                                         | 364<br>400                      | 8E-44<br>1E-28                            |
| DV495706              | 5.60E-03        | B73<Mo17            | 1.4                      | 4                   | >ref XP_470597.1  Putative methionyl-tRNA synthetase [Oryza sativa (japonica cultivar-group)] gb AAN77311.1  Putative methionyl-tRNA synthetase [Oryza sativa (japonica cultivar-group)]<br>>gb AAM91427.1  AT3g55400/T22E16_60 [Arabidopsis thaliana]gb AAK32940.1  AT3g55400/T22E16_60 [Arabidopsis thaliana]<br>>ref NP_191100.1  ATP binding / methionine-tRNA ligase/ tRNA ligase [Arabidopsis thaliana] emb CAB75898.1  methionyl-tRNA synthetase (AtpMetRS) [Arabidopsis thaliana]                                                                                                                                                                                                                                                                                                                                                                           | 579<br>616<br>616               | 2E-18<br>2E-11<br>2E-11                   |

**Table 4. Microarray analysis results, mode of gene action classification, and BLAST annotation for the 1,367 ESTs identified as differentially expressed among genotypes (15% FDR)**

| GenBank accession no. | Overall P value | Significant pattern | Fold change <sup>†</sup> | Sector <sup>‡</sup> | BLAST annotation*                                                                                                                                                                                                                                                                                                                                                                                                                                                         | Score | E value |
|-----------------------|-----------------|---------------------|--------------------------|---------------------|---------------------------------------------------------------------------------------------------------------------------------------------------------------------------------------------------------------------------------------------------------------------------------------------------------------------------------------------------------------------------------------------------------------------------------------------------------------------------|-------|---------|
| Al621867              | 5.61E-03        | Mo17<B73=F1         | 2.85                     | 11                  | >emb CAA74281.1  MeIR5 [Arabidopsis thaliana]                                                                                                                                                                                                                                                                                                                                                                                                                             | 616   | 5E-11   |
|                       |                 |                     |                          |                     | >ref XP_466595.1  mitochondrial transcription termination factor-like protein [Oryzasativa (japonica cultivar-group)] dbj BAD22170.1  mitochondrial transcription termination factor-like protein [Oryza sativa (japonica cultivar-group)] dbj BAD19344.1  mitochondrial transcription termination factor-like protein [Oryza sativa (japonica cultivar-group)]                                                                                                           | 271   | 5E-65   |
|                       |                 |                     |                          |                     | >ref NP_567435.1  unknown protein [Arabidopsis thaliana]                                                                                                                                                                                                                                                                                                                                                                                                                  | 444   | 2E-29   |
|                       |                 |                     |                          |                     | >emb CAB10239.1  hypothetical protein [Arabidopsis thaliana]emb CAB78502.1  hypothetical protein [Arabidopsis thaliana]                                                                                                                                                                                                                                                                                                                                                   | 590   | 2E-29   |
|                       |                 |                     |                          |                     | >ref NP_178405.2  unknown protein [Arabidopsis thaliana]gb AAT69165.1  hypothetical protein At2g03050 [Arabidopsis thaliana] gb AAO37134.1  hypothetical protein [Arabidopsis thaliana]                                                                                                                                                                                                                                                                                   | 283   | 8E-18   |
|                       |                 |                     |                          |                     | >gb AAC32923.1  predicted by genefinder and genscan [Arabidopsis thaliana]                                                                                                                                                                                                                                                                                                                                                                                                | 284   | 8E-18   |
| CD670178              | 5.61E-03        | Mo17<B73=F1         | 1.42                     | 10                  | >ref XP_478414.1  putative translational inhibitor protein [Oryza sativa (japonica cultivar-group)] dbj BAC20708.1  putative translational inhibitor protein [Oryza sativa (japonica cultivar-group)] dbj BAD31311.1  putative translational inhibitor protein [Oryza sativa (japonica cultivar-group)]                                                                                                                                                                   | 180   | 4E-58   |
|                       |                 |                     |                          |                     | >dbj BAD00048.1  perchloric acid soluble translation inhibitor protein homolog[Gentiana triflora] dbj BAC66487.1  translation-inhibitor protein [Gentiana triflora]                                                                                                                                                                                                                                                                                                       | 188   | 6E-54   |
|                       |                 |                     |                          |                     | >ref NP_188674.1  endoribonuclease [Arabidopsis thaliana]gb AAK53030.1  AT3g20390/MQC12_15 [Arabidopsis thaliana] gb AAL31178.1  AT3g20390/MQC12_15 [Arabidopsis thaliana] gb AAM63246.1  translational inhibitor protein, putative [Arabidopsis thaliana]                                                                                                                                                                                                                | 187   | 1E-52   |
|                       |                 |                     |                          |                     | >dbj BAB02821.1  unnamed protein product [Arabidopsis thaliana]                                                                                                                                                                                                                                                                                                                                                                                                           | 143   | 1E-52   |
|                       |                 |                     |                          |                     | >emb CAE56534.1  Hypothetical protein CBG24261 [Caenorhabditis briggsae]                                                                                                                                                                                                                                                                                                                                                                                                  | 172   | 2E-32   |
|                       |                 |                     |                          |                     | >gb AAX95093.1  ubiquinol--cytochrome-c reductase, putative [Oryza sativa (japonica cultivar-group)] gb ABA91661.1  ubiquinol--cytochrome-c reductase, putative [Oryza sativa (japonica cultivar-group)]                                                                                                                                                                                                                                                                  | 96    | 1E-16   |
| DV622264              | 5.61E-03        | B73=F1<Mo17         | 1.17                     | 4                   | >gb AAM63085.1  putative ubiquinol--cytochrome-c reductase [Arabidopsis thaliana]                                                                                                                                                                                                                                                                                                                                                                                         | 69    | 1E-15   |
|                       |                 |                     |                          |                     | >ref NP_172964.1  ubiquinol-cytochrome-c reductase [Arabidopsis thaliana]                                                                                                                                                                                                                                                                                                                                                                                                 | 69    | 2E-15   |
|                       |                 |                     |                          |                     | >emb CAA55860.1  ubiquinol--cytochrome c reductase [Solanum tuberosum]sp P48504 UCRH_SOLTU Ubiquinol-cytochrome c reductase complex 7.8 kDa protein (Mitochondrial hinge protein) (CR7)                                                                                                                                                                                                                                                                                   | 69    | 2E-14   |
|                       |                 |                     |                          |                     | >dbj BAD28224.1  putative ubiquinol-cytochrome C reductase complex 7.8 kDa protein[Oryza sativa (japonica cultivar-group)] dbj BAD28073.1  putative ubiquinol-cytochrome C reductase complex 7.8 kDa protein [Oryza sativa (japonica cultivar-group)]                                                                                                                                                                                                                     | 69    | 1E-13   |
|                       |                 |                     |                          |                     | >ref XP_474269.1  OSJNBa0043A12.6 [Oryza sativa (japonica cultivar-group)]emb CAE02801.1  OSJNBa0043A12.6 [Oryza sativa (japonica cultivar-group)]                                                                                                                                                                                                                                                                                                                        | 148   | 7E-41   |
|                       |                 |                     |                          |                     | >gb AAU82109.1  ubiquitin-conjugating enzyme [Triticum aestivum]                                                                                                                                                                                                                                                                                                                                                                                                          | 148   | 7E-41   |
| CD001524              | 5.70E-03        | Mo17<B73            | 1.27                     | 10                  | >gb AAF24583.1  F22C12.2 [Arabidopsis thaliana]                                                                                                                                                                                                                                                                                                                                                                                                                           | 146   | 2E-40   |
|                       |                 |                     |                          |                     | >ref NP_001031228.1  ubiquitin conjugating enzyme/ ubiquitin-like activating enzyme[Arabidopsis thaliana] ref NP_564828.1  ubiquitin conjugating enzyme/ ubiquitin-like activating enzyme [Arabidopsis thaliana] gb AAM91500.1  At1g64230/F22C12_17 [Arabidopsis thaliana] gb AAM11574.1  ubiquitin conjugating enzyme UBC9A [Arabidopsis thaliana] gb AAK60309.1  At1g64230/F22C12_17 [Arabidopsis thaliana] gb AAY44867.1  ubiquitinating enzyme [Arabidopsis thaliana] | 148   | 2E-40   |
|                       |                 |                     |                          |                     | >gb AAR83898.1  ubiquitin-conjugating protein [Capsicum annuum]                                                                                                                                                                                                                                                                                                                                                                                                           | 119   | 3E-40   |
|                       |                 |                     |                          |                     | >ref NP_908404.1  putative co-repressor protein [Oryza sativa (japonica cultivar-group)]                                                                                                                                                                                                                                                                                                                                                                                  | 1589  | 3E-21   |
|                       |                 |                     |                          |                     | >ref XP_549870.1  hypothetical protein [Oryza sativa (japonica cultivar-group)]dbj BAD44866.1  hypothetical protein [Oryza sativa (japonica cultivar-group)]                                                                                                                                                                                                                                                                                                              | 155   | 2E-20   |
|                       |                 |                     |                          |                     | >dbj BAD46525.1  unknown protein [Oryza sativa (japonica cultivar-group)]                                                                                                                                                                                                                                                                                                                                                                                                 | 115   | 1E-10   |
| CB380927              | 5.77E-03        | Mo17<B73            | 1.33                     | 10                  | >gb ABA97552.1  Ribosomal S3Ae family, putative [Oryza sativa (japonica cultivar-group)]                                                                                                                                                                                                                                                                                                                                                                                  | 800   | 2E-61   |
|                       |                 |                     |                          |                     | >ref XP_464995.1  putative ribosomal protein S3a, cytosolic [Oryza sativa (japonica cultivar-group)] ref XP_506775.1  PREDICTED OJ1115_D03.49 gene product [Oryza sativa (japonica cultivar-group)] dbj BAD21711.1  putative ribosomal protein S3a, cytosolic [Oryza sativa (japonica cultivar-group)] dbj BAD21513.1  putative ribosomal protein S3a, cytosolic [Oryza sativa (japonica cultivar-group)]                                                                 | 261   | 3E-61   |
|                       |                 |                     |                          |                     | >gb AAC98779.1  S-phase-specific ribosomal protein [Oryza sativa]                                                                                                                                                                                                                                                                                                                                                                                                         | 261   | 7E-61   |
|                       |                 |                     |                          |                     | >dbj BAA05059.1  cyc07 [Oryza sativa]sp P49397 RS3A_ORYSA 40S ribosomal protein S3a (CYC07 protein)                                                                                                                                                                                                                                                                                                                                                                       | 262   | 7E-61   |
|                       |                 |                     |                          |                     | >dbj BAA89498.1  cyc07 [Daucus carota]                                                                                                                                                                                                                                                                                                                                                                                                                                    | 261   | 8E-58   |
|                       |                 |                     |                          |                     | >ref XP_463020.1  putative Acyl-CoA-binding protein [Oryza sativa (japonica cultivar-group)] gb AAR10857.1  putative Acyl-CoA-binding protein [Oryza sativa (japonica cultivar-group)]                                                                                                                                                                                                                                                                                    | 155   | 2E-39   |
| CD058818              | 5.79E-03        | Mo17<B73            | 1.83                     | 10                  | >ref NP_913999.1  putative Acyl-CoA binding protein (ACBP) [Oryza sativa (japonica cultivar-group)] dbj BAC99898.1  putative Acyl-CoA binding protein (ACBP) [Oryza sativa (japonica cultivar-group)] dbj BAC57826.1  putative Acyl-CoA binding protein (ACBP) [Oryza sativa (japonica cultivar-group)]                                                                                                                                                                   | 91    | 3E-39   |
|                       |                 |                     |                          |                     | >dbj BAB85987.1  Acyl-CoA-binding protein [Panax ginseng]                                                                                                                                                                                                                                                                                                                                                                                                                 | 87    | 2E-38   |
|                       |                 |                     |                          |                     | >gb AAP82942.1  acyl-CoA-binding protein [Tropaeolum majus]                                                                                                                                                                                                                                                                                                                                                                                                               | 90    | 7E-38   |
|                       |                 |                     |                          |                     | >emb CAB56693.1  Acyl-CoA binding protein (ACBP) [Digitalis lanata]                                                                                                                                                                                                                                                                                                                                                                                                       | 92    | 3E-37   |
|                       |                 |                     |                          |                     | >ref XP_472755.1  OSJNBa0072F16.12 [Oryza sativa (japonica cultivar-group)]emb CAD40987.2  OSJNBa0072F16.12 [Oryza sativa (japonica cultivar-group)]                                                                                                                                                                                                                                                                                                                      | 183   | 4E-51   |
|                       |                 |                     |                          |                     | >emb CAA10984.1  hypothetical protein [Hordeum vulgare subsp. vulgare]sp O48609 RRP3_HORVU Plastid-specific 30S ribosomal protein 3, chloroplast precursor (PSRP-3)                                                                                                                                                                                                                                                                                                       | 181   | 1E-47   |

**Table 4. Microarray analysis results, mode of gene action classification, and BLAST annotation for the 1,367 ESTs identified as differentially expressed among genotypes (15% FDR)**

| GenBank accession no. | Overall P value | Significant pattern | Fold change <sup>†</sup> | Sector <sup>‡</sup> | BLAST annotation*                                                                                                                                                                                                                                                                                                                                                                                         | Score | E value |
|-----------------------|-----------------|---------------------|--------------------------|---------------------|-----------------------------------------------------------------------------------------------------------------------------------------------------------------------------------------------------------------------------------------------------------------------------------------------------------------------------------------------------------------------------------------------------------|-------|---------|
|                       |                 |                     |                          |                     | >gb AAF64163.1  plastid-specific ribosomal protein 3 precursor [Spinacia oleracea]sp P82412 RRP3_SPIOL Plastid-specific 30S ribosomal protein 3, chloroplast precursor (PSRP-3)                                                                                                                                                                                                                           | 179   | 2E-37   |
|                       |                 |                     |                          |                     | >ref NP_564934.1  structural constituent of ribosome [Arabidopsis thaliana]gb AAO50623.1  unknown protein [Arabidopsis thaliana] gb AAO42029.1  unknown protein [Arabidopsis thaliana] gb AAD49984.1  ESTs gb H37416, gb T21163, gb T76138 and gb AA651329 come from this gene. [Arabidopsis thaliana] sp Q9SX22 RRP31 ARATH Plastid-specific 30S ribosomal protein 3-1, chloroplast precursor (PSRP-3 1) | 166   | 1E-34   |
|                       |                 |                     |                          |                     | >gb AAM63350.1  plastid-specific ribosomal protein 3 precursor [Arabidopsisthaliana]                                                                                                                                                                                                                                                                                                                      | 166   | 1E-34   |
| CB617112              | 5.84E-03        | Mo17<B73=F1         | 1.43                     | 10                  | >ref XP_463045.1  expressed protein [Oryza sativa (japonica cultivar-group)]gb AAS07181.1  expressed protein [Oryza sativa (japonica cultivar-group)]                                                                                                                                                                                                                                                     | 91    | 7E-18   |
|                       |                 |                     |                          |                     | >emb CAJ13713.1  hypothetical protein [Capsicum chinense]                                                                                                                                                                                                                                                                                                                                                 | 96    | 2E-16   |
|                       |                 |                     |                          |                     | >ref NP_850005.1  unknown protein [Arabidopsis thaliana]gb AAK00397.1  unknown protein [Arabidopsis thaliana] gb AAG41478.1  unknown protein [Arabidopsis thaliana] gb AAL06786.1  At2g20820/F5H14.21 [Arabidopsis thaliana] gb AAG40023.1  At2g20820 [Arabidopsis thaliana] gb AAK55709.1  At2g20820/F5H14.21 [Arabidopsis thaliana]                                                                     | 93    | 3E-15   |
| DV489865              | 5.85E-03        | B73=Mo17<F1         | 1.29                     | 1                   | >gb AAT78818.1  expressed protein [Oryza sativa (japonica cultivar-group)]                                                                                                                                                                                                                                                                                                                                | 290   | 2E-39   |
|                       |                 |                     |                          |                     | >ref XP_479197.1  unknown protein [Oryza sativa (japonica cultivar-group)]dbj BAC79910.1  unknown protein [Oryza sativa (japonica cultivar-group)]                                                                                                                                                                                                                                                        | 288   | 6E-37   |
|                       |                 |                     |                          |                     | >ref NP_195696.1  unknown protein [Arabidopsis thaliana]emb CAB80649.1  putative protein [Arabidopsis thaliana] emb CAB38899.1  putative protein [Arabidopsis thaliana]                                                                                                                                                                                                                                   | 299   | 1E-21   |
|                       |                 |                     |                          |                     | >ref NP_849528.1  unknown protein [Arabidopsis thaliana]gb AAM51361.1  unknown protein [Arabidopsis thaliana] gb AAL36221.1  unknown protein [Arabidopsis thaliana]                                                                                                                                                                                                                                       | 298   | 1E-21   |
|                       |                 |                     |                          |                     | >gb AAM62782.1  unknown [Arabidopsis thaliana]                                                                                                                                                                                                                                                                                                                                                            | 299   | 3E-21   |
| CB617282              | 5.86E-03        | Mo17<F1             | 1.24                     | 12                  | ns                                                                                                                                                                                                                                                                                                                                                                                                        |       |         |
| DV622441              | 5.88E-03        | B73=F1<Mo17         | 1.23                     | 5                   | >ref NP_973987.1  unknown protein [Arabidopsis thaliana]ref NP_564513.1  unknown protein [Arabidopsis thaliana] gb AAM45073.1  unknown protein [Arabidopsis thaliana] gb AAL87252.1  unknown protein [Arabidopsis thaliana]                                                                                                                                                                               | 279   | 3E-31   |
|                       |                 |                     |                          |                     | >gb AAM65611.1  unknown [Arabidopsis thaliana]                                                                                                                                                                                                                                                                                                                                                            | 251   | 3E-31   |
|                       |                 |                     |                          |                     | >gb AAF99798.1  T2E6.19 [Arabidopsis thaliana]                                                                                                                                                                                                                                                                                                                                                            | 292   | 3E-31   |
|                       |                 |                     |                          |                     | >ref NP_199542.1  unknown protein [Arabidopsis thaliana]gb AAO64931.1  At5g47310 [Arabidopsis thaliana] dbj BAA97165.1  unnamed protein product [Arabidopsis thaliana]                                                                                                                                                                                                                                    | 245   | 3E-18   |
|                       |                 |                     |                          |                     | >ref NP_565243.1  unknown protein [Arabidopsis thaliana]gb AAM65516.1  unknown [Arabidopsis thaliana]                                                                                                                                                                                                                                                                                                     | 227   | 4E-18   |
| BM337880              | 5.88E-03        | F1=Mo17<B73         | 3.26                     | 8                   | ns                                                                                                                                                                                                                                                                                                                                                                                                        |       |         |
| DV490892              | 5.92E-03        | B73<F1=Mo17         | 1.76                     | 2                   | ns                                                                                                                                                                                                                                                                                                                                                                                                        |       |         |
| DV942831              | 5.93E-03        | Mo17<B73=F1         | 2.06                     | 10                  | >ref XP_472941.1  OSJNBa0081L15.17 [Oryza sativa (japonica cultivar-group)]emb CAD41394.2  OJ000223_09.7 [Oryza sativa (japonica cultivar-group)] emb CAE03155.2  OSJNBa0081L15.17 [Oryza sativa (japonica cultivar-group)]                                                                                                                                                                               | 308   | 3E-28   |
|                       |                 |                     |                          |                     | >gb AAS78923.1  CDC48-interacting UBX-domain protein [Arabidopsis thaliana]ref NP_566815.1  PUX1 (PLANT UBX DOMAIN-CONTAINING PROTEIN 1) [Arabidopsis thaliana] gb AAM61610.1  unknown [Arabidopsis thaliana] dbj BAD43047.1  unknown protein [Arabidopsis thaliana] dbj BAB02126.1  unnamed protein product [Arabidopsis thaliana]                                                                       | 251   | 4E-8    |
| BM339782              | 5.97E-03        | F1=Mo17<B73         | 2.87                     | 9                   | ns                                                                                                                                                                                                                                                                                                                                                                                                        |       |         |
| BM079789              | 5.99E-03        | F1=Mo17<B73         | 1.41                     | 9                   | >ref XP_470786.1  putative metacaspase, having alternative splicing products [Oryzasativa (japonica cultivar-group)] gb AAR06360.1  putative metacaspase, having alternative splicing products [Oryza sativa (japonica cultivar-group)]                                                                                                                                                                   | 149   | 5E-28   |
|                       |                 |                     |                          |                     | >ref XP_470787.1  putative metacaspase, having alternative splicing products [Oryzasativa (japonica cultivar-group)] gb AAR06359.1  putative metacaspase, having alternative splicing products [Oryza sativa (japonica cultivar-group)]                                                                                                                                                                   | 368   | 5E-28   |
|                       |                 |                     |                          |                     | >ref XP_470796.1  putative metacaspase [Oryza sativa (japonica cultivar-group)]gb AAR06365.1  putative metacaspase [Oryza sativa (japonica cultivar-group)]                                                                                                                                                                                                                                               | 369   | 7E-15   |
|                       |                 |                     |                          |                     | >ref XP_470792.1  putative metacaspase [Oryza sativa (japonica cultivar-group)]gb AAR06374.1  putative metacaspase [Oryza sativa (japonica cultivar-group)]                                                                                                                                                                                                                                               | 400   | 3E-13   |
|                       |                 |                     |                          |                     | >ref NP_171719.2  LOL3 (LSD ONE LIKE 3); caspase/ cysteine-type endopeptidase[Arabidopsis thaliana] gb AAP84706.1  metacaspase 1 [Arabidopsis thaliana] gb AAP44514.1  metacaspase 1 [Arabidopsis thaliana]                                                                                                                                                                                               | 367   | 4E-7    |
| CB381505              | 5.99E-03        | Mo17<B73=F1         | 1.31                     | 10                  | ns                                                                                                                                                                                                                                                                                                                                                                                                        |       |         |
| CD661670              | 6.05E-03        | B73<F1=Mo17         | 1.34                     | 3                   | >gb AAA20239.1  cyclin IaZm                                                                                                                                                                                                                                                                                                                                                                               | 420   | 2E-79   |
|                       |                 |                     |                          |                     | >ref NP_915872.1  putative cyclin Ia [Oryza sativa (japonica cultivar-group)]dbj BAB92272.1  putative cyclin [Oryza sativa (japonica cultivar-group)]                                                                                                                                                                                                                                                     | 449   | 2E-65   |
|                       |                 |                     |                          |                     | >ref XP_475474.1  hypothetical protein [Oryza sativa (japonica cultivar-group)]gb AAT69653.1  hypothetical protein [Oryza sativa (japonica cultivar-group)]                                                                                                                                                                                                                                               | 521   | 3E-55   |
|                       |                 |                     |                          |                     | >dbj BAE53367.1  cyclin B1 [Allium cepa]                                                                                                                                                                                                                                                                                                                                                                  | 487   | 2E-52   |
|                       |                 |                     |                          |                     | >emb CAB81558.1  cyclin B1 [Nicotiana tabacum]                                                                                                                                                                                                                                                                                                                                                            | 425   | 3E-51   |
| DV489769              | 6.06E-03        | Mo17<B73=F1         | 1.39                     | 10                  | ns                                                                                                                                                                                                                                                                                                                                                                                                        |       |         |
| BM073952              | 6.08E-03        | Mo17<B73=F1         | 2.76                     | 10                  | ns                                                                                                                                                                                                                                                                                                                                                                                                        |       |         |
| CB886178              | 6.11E-03        | B73<Mo17            | 1.71                     | 3                   | ns                                                                                                                                                                                                                                                                                                                                                                                                        |       |         |
| CB604605              | 6.12E-03        | Mo17<B73=F1         | 1.39                     | 10                  | >ref XP_483345.1  unknown protein [Oryza sativa (japonica cultivar-group)]dbj BAD09976.1  unknown protein [Oryza sativa (japonica cultivar-group)]                                                                                                                                                                                                                                                        | 197   | 6E-58   |
|                       |                 |                     |                          |                     | >ref XP_483344.1  unknown protein [Oryza sativa (japonica cultivar-group)]dbj BAD09975.1  unknown protein [Oryza sativa (japonica cultivar-group)]                                                                                                                                                                                                                                                        | 241   | 6E-58   |

**Table 4. Microarray analysis results, mode of gene action classification, and BLAST annotation for the 1,367 ESTs identified as differentially expressed among genotypes (15% FDR)**

| GenBank accession no. | Overall P value | Significant pattern | Fold change <sup>†</sup> | Sector <sup>‡</sup> | BLAST annotation*                                                                                                                                                                                                                                                                                                                                                                                                                                                                                                                                                                                                                                                          | Score | E value |
|-----------------------|-----------------|---------------------|--------------------------|---------------------|----------------------------------------------------------------------------------------------------------------------------------------------------------------------------------------------------------------------------------------------------------------------------------------------------------------------------------------------------------------------------------------------------------------------------------------------------------------------------------------------------------------------------------------------------------------------------------------------------------------------------------------------------------------------------|-------|---------|
|                       |                 |                     |                          |                     | >ref NP_566574.1  S-adenosylmethionine-dependent methyltransferase/ catalytic[Arabidopsis thaliana] gb AAM67530.1  unknown protein [Arabidopsis thaliana]                                                                                                                                                                                                                                                                                                                                                                                                                                                                                                                  | 239   | 2E-41   |
|                       |                 |                     |                          |                     | gb AAK93650.1  unknown protein [Arabidopsis thaliana]                                                                                                                                                                                                                                                                                                                                                                                                                                                                                                                                                                                                                      |       |         |
|                       |                 |                     |                          |                     | >ref NP_191650.2  S-adenosylmethionine-dependent methyltransferase/ catalytic/methyltransferase [Arabidopsis thaliana] gb AAM67532.1  unknown protein [Arabidopsis thaliana] gb AAL86352.1  unknown protein [Arabidopsis thaliana]                                                                                                                                                                                                                                                                                                                                                                                                                                         | 252   | 2E-32   |
|                       |                 |                     |                          |                     | >dbj BAB02741.1  unnamed protein product [Arabidopsis thaliana]                                                                                                                                                                                                                                                                                                                                                                                                                                                                                                                                                                                                            | 419   | 1E-30   |
| DV494243              | 6.12E-03        | Mo17<B73            | 1.49                     | 10                  | >dbj BAD35675.1  putative cinnamoyl-CoA reductase [Oryza sativa (japonica cultivar-group)]                                                                                                                                                                                                                                                                                                                                                                                                                                                                                                                                                                                 | 321   | 3E-22   |
|                       |                 |                     |                          |                     | >dbj BAD35672.1  putative cinnamoyl-CoA reductase [Oryza sativa (japonica cultivar-group)]                                                                                                                                                                                                                                                                                                                                                                                                                                                                                                                                                                                 | 321   | 9E-21   |
|                       |                 |                     |                          |                     | >ref NP_180917.1  cinnamoyl-CoA reductase [Arabidopsis thaliana] gb AAN15374.1  putative cinnamoyl-CoA reductase [Arabidopsis thaliana] gb AAM53272.1  putative cinnamoyl-CoA reductase [Arabidopsis thaliana] gb AAB80683.1  putative cinnamoyl-CoA reductase [Arabidopsis thaliana] gb AAM61149.1  putative cinnamoyl-CoA reductase [Arabidopsis thaliana]                                                                                                                                                                                                                                                                                                               | 321   | 4E-15   |
|                       |                 |                     |                          |                     | >ref NP_180918.1  cinnamoyl-CoA reductase [Arabidopsis thaliana] gb AAP42731.1  At2g33600 [Arabidopsis thaliana] gb AAM13142.1  putative cinnamoyl-CoA reductase [Arabidopsis thaliana] gb AAB80683.1  putative cinnamoyl-CoA reductase [Arabidopsis thaliana]                                                                                                                                                                                                                                                                                                                                                                                                             | 321   | 1E-13   |
|                       |                 |                     |                          |                     | >ref NP_177773.1  cinnamoyl-CoA reductase [Arabidopsis thaliana] gb AAG51951.1  putative cinnamoyl-CoA reductase; 27707-26257 [Arabidopsis thaliana]                                                                                                                                                                                                                                                                                                                                                                                                                                                                                                                       | 317   | 4E-10   |
|                       |                 |                     |                          |                     | >dbj BAD54446.1  putative xyloglucan endotransglycosylase [Oryza sativa (japonica cultivar-group)] dbj BAD53910.1  putative xyloglucan endotransglycosylase                                                                                                                                                                                                                                                                                                                                                                                                                                                                                                                |       |         |
| DV492157              | 6.12E-03        | B73=F1<Mo17         | 1.57                     | 4                   | [Oryza sativa (japonica cultivar-group)]                                                                                                                                                                                                                                                                                                                                                                                                                                                                                                                                                                                                                                   | 293   | 2E-23   |
|                       |                 |                     |                          |                     | >emb CAC40807.1  Xet1 protein [Festuca pratensis]                                                                                                                                                                                                                                                                                                                                                                                                                                                                                                                                                                                                                          | 291   | 4E-21   |
|                       |                 |                     |                          |                     | >emb CAA63663.1  xyloglucan endotransglycosylase (XET) [Hordeum vulgare subsp.vulgare]                                                                                                                                                                                                                                                                                                                                                                                                                                                                                                                                                                                     | 286   | 3E-20   |
|                       |                 |                     |                          |                     | >gb AAT94297.1  endotransglycosylase/hydrolase XTH5 [Triticum aestivum]                                                                                                                                                                                                                                                                                                                                                                                                                                                                                                                                                                                                    | 287   | 3E-20   |
|                       |                 |                     |                          |                     | >ref NP_200564.1  TCH4 (TOUCH 4); hydrolase, acting on glycosyl bonds / hydrolase,hydrolyzing O-glycosyl compounds [Arabidopsis thaliana] gb AAL38614.1  AT5g57560/MUA2_13 [Arabidopsis thaliana] gb AAL05902.1  AT5g57560/MUA2_13 [Arabidopsis thaliana] gb AAK96616.1  AT5g57560/MUA2_13 [Arabidopsis thaliana] gb AAK56251.1  AT5g57560/MUA2_13 [Arabidopsis thaliana] dbj BAB08791.1  TCH4 protein [Arabidopsis thaliana] sp Q38857 XTH22_ARATH Xyloglucan endotransglycosylase/hydrolase protein 22 precursor (At-XTH22) (XTH-22) (Touch protein 4) gb AAC05572.1  xyloglucan endotransglycosylase related protein [Arabidopsis thaliana] gb AAA92363.1  TCH4 protein | 284   | 1E-13   |
| DV490786              | 6.12E-03        | F1<B73=Mo17         | 4.13                     | 7                   | >gb ABA94217.1  hypothetical protein LOC Os11g34320 [Oryza sativa (japonica cultivar-group)]                                                                                                                                                                                                                                                                                                                                                                                                                                                                                                                                                                               | 362   | 1E-35   |
|                       |                 |                     |                          |                     | >emb CAC35876.1  putative protein [Arabidopsis thaliana]                                                                                                                                                                                                                                                                                                                                                                                                                                                                                                                                                                                                                   | 435   | 4E-24   |
|                       |                 |                     |                          |                     | >ref NP_680156.2  Ran GTPase binding / chromatin binding [Arabidopsis thaliana] gb AAO63918.1  putative UVB-resistance protein UVR8 [Arabidopsis thaliana] dbj BAC43467.1  unknown protein [Arabidopsis thaliana]                                                                                                                                                                                                                                                                                                                                                                                                                                                          | 434   | 4E-24   |
| DV621846              | 6.13E-03        | B73<F1=Mo17         | 1.26                     | 3                   | >dbj BAD46415.1  putative ubiquitin carrier protein E2 [Oryza sativa (japonica cultivar-group)]                                                                                                                                                                                                                                                                                                                                                                                                                                                                                                                                                                            | 252   | 8E-50   |
|                       |                 |                     |                          |                     | >ref NP_568148.1  ubiquitin conjugating enzyme/ ubiquitin-like activating enzyme [Arabidopsis thaliana] gb AAM51582.1  AT5g05080/MUG13_6 [Arabidopsis thaliana] gb AAL16250.1  AT5g05080/MUG13_6 [Arabidopsis thaliana] gb AAM65652.1  E2, ubiquitin-conjugating enzyme, putative [Arabidopsis thaliana] dbj BAB11530.1  unnamed protein product [Arabidopsis thaliana] gb AAY44862.1  ubiquitininating enzyme [Arabidopsis thaliana]                                                                                                                                                                                                                                      | 251   | 4E-33   |
|                       |                 |                     |                          |                     | >gb AAZ57342.1  HL01424p [Drosophila melanogaster] gb AAZ57341.1  AT05212p [Drosophila melanogaster] ref NP_573237.2  CG8188-PA, isoform A [Drosophila melanogaster] ref NP_001033852.1  CG8188-PB, isoform B [Drosophila melanogaster] gb ABC67190.1  CG8188-PB, isoform B [Drosophila melanogaster] gb AAF48756.2  CG8188-PA, isoform A [Drosophila melanogaster]                                                                                                                                                                                                                                                                                                        | 209   | 5E-17   |
|                       |                 |                     |                          |                     | >ref NP_001016438.1  hypothetical protein LOC549192 [Xenopus tropicalis]                                                                                                                                                                                                                                                                                                                                                                                                                                                                                                                                                                                                   | 211   | 7E-17   |
|                       |                 |                     |                          |                     | >gb AA106318.1  MGC52831 protein [Xenopus laevis] gb AAH41263.1  MGC52831 protein [Xenopus laevis]                                                                                                                                                                                                                                                                                                                                                                                                                                                                                                                                                                         | 211   | 2E-16   |
| BM347887              | 6.13E-03        | F1=Mo17<B73         | 1.78                     | 9                   | ns                                                                                                                                                                                                                                                                                                                                                                                                                                                                                                                                                                                                                                                                         |       |         |
| CB617151              | 6.15E-03        | Mo17<B73=F1         | 1.31                     | 11                  | >ref XP_483414.1  putative ribosomal protein L32 [Oryza sativa (japonica cultivar-group)] dbj BAC75414.1  putative ribosomal protein L32 [Oryza sativa (japonica cultivar-group)]                                                                                                                                                                                                                                                                                                                                                                                                                                                                                          | 133   | 4E-61   |
|                       |                 |                     |                          |                     | >emb CAH55765.1  ribosomal L32 [Oryza sativa (indica cultivar-group)]                                                                                                                                                                                                                                                                                                                                                                                                                                                                                                                                                                                                      | 133   | 2E-58   |
|                       |                 |                     |                          |                     | >gb AAZ32896.1  ribosomal protein L32 [Medicago sativa]                                                                                                                                                                                                                                                                                                                                                                                                                                                                                                                                                                                                                    | 133   | 1E-53   |
|                       |                 |                     |                          |                     | >gb AAR83884.1  ly200 protein [Capsicum annuum]                                                                                                                                                                                                                                                                                                                                                                                                                                                                                                                                                                                                                            | 133   | 2E-53   |
|                       |                 |                     |                          |                     | >gb ABB02639.1  ly200-like protein [Solanum tuberosum] gb ABA40471.1  ly200-like protein [Solanum tuberosum]                                                                                                                                                                                                                                                                                                                                                                                                                                                                                                                                                               | 133   | 9E-53   |
| CD661726              | 6.17E-03        | B73<F1<Mo17         | 1.31                     | 4                   | >gb AAT85295.1  FYVE zinc finger containing protein [Oryza sativa (japonica cultivar-group)]                                                                                                                                                                                                                                                                                                                                                                                                                                                                                                                                                                               | 1094  | 2E-31   |
|                       |                 |                     |                          |                     | >ref XP_469219.1  unknown protein [Oryza sativa (japonica cultivar-group)] gb AAP44653.1  unknown protein [Oryza sativa (japonica cultivar-group)]                                                                                                                                                                                                                                                                                                                                                                                                                                                                                                                         | 1142  | 2E-31   |
|                       |                 |                     |                          |                     | >ref NP_176362.3  zinc ion binding [Arabidopsis thaliana] gb AAR23716.1  At1g61690 [Arabidopsis thaliana] dbj BAD93965.1  hypothetical protein [Arabidopsis thaliana]                                                                                                                                                                                                                                                                                                                                                                                                                                                                                                      | 1171  | 1E-12   |
|                       |                 |                     |                          |                     | >gb AAD21427.1  Hypothetical protein [Arabidopsis thaliana]                                                                                                                                                                                                                                                                                                                                                                                                                                                                                                                                                                                                                | 1188  | 1E-12   |
| CB380604              | 6.24E-03        | B73<F1=Mo17         | 1.28                     | 3                   | >ref XP_482960.1  unknown protein [Oryza sativa (japonica cultivar-group)] dbj BAD09002.1  unknown protein [Oryza sativa (japonica cultivar-group)]                                                                                                                                                                                                                                                                                                                                                                                                                                                                                                                        | 422   | 7E-34   |
| CB334557              | 6.24E-03        | Mo17<B73=F1         | 1.29                     | 10                  | >sp O48557 RL17 MAIZE 60S ribosomal protein L17 gb AAB88619.1  ribosomal protein L17 [Zea mays]                                                                                                                                                                                                                                                                                                                                                                                                                                                                                                                                                                            | 171   | 3E-69   |
|                       |                 |                     |                          |                     | >ref XP_450351.1  putative ribosomal protein L17 [Oryza sativa (japonica cultivar-group)] ref XP_507427.1  PREDICTED P0523B07.46 gene product [Oryza sativa (japonica cultivar-group)] ref XP_506642.1  PREDICTED P0523B07.46 gene product [Oryza sativa (japonica cultivar-group)] dbj BAD23752.1  putative ribosomal protein L17 [Oryza sativa (japonica cultivar-group)] dbj BAD23438.1  putative ribosomal protein L17 [Oryza sativa (japonica cultivar-group)]                                                                                                                                                                                                        | 171   | 4E-64   |

**Table 4. Microarray analysis results, mode of gene action classification, and BLAST annotation for the 1,367 ESTs identified as differentially expressed among genotypes (15% FDR)**

| GenBank accession no. | Overall P value | Significant pattern | Fold change <sup>†</sup> | Sector <sup>‡</sup> | BLAST annotation*                                                                                                                                                                                                                                                                                                                                                                                                                                                                                                                                                                                                                                                                                                                                                                                                                                                         | Score | E value |
|-----------------------|-----------------|---------------------|--------------------------|---------------------|---------------------------------------------------------------------------------------------------------------------------------------------------------------------------------------------------------------------------------------------------------------------------------------------------------------------------------------------------------------------------------------------------------------------------------------------------------------------------------------------------------------------------------------------------------------------------------------------------------------------------------------------------------------------------------------------------------------------------------------------------------------------------------------------------------------------------------------------------------------------------|-------|---------|
|                       |                 |                     |                          |                     | >ref XP_483472.1  putative ribosomal protein L17 [Oryza sativa (japonica cultivar-group)] dbj BAD09119.1  putative ribosomal protein L17 [Oryza sativa (japonica cultivar-group)] dbj BAD09020.1  putative ribosomal protein L17 [Oryza sativa (japonica cultivar-group)]                                                                                                                                                                                                                                                                                                                                                                                                                                                                                                                                                                                                 | 171   | 4E-64   |
|                       |                 |                     |                          |                     | >gb AAG49551.1  ribosomal protein L17-1 [Poa secunda]                                                                                                                                                                                                                                                                                                                                                                                                                                                                                                                                                                                                                                                                                                                                                                                                                     | 171   | 4E-61   |
| DV490317              | 6.26E-03        | F1=Mo17<B73         | 1.49                     | 9                   | >emb CAA44598.1  ribosomal protein L17-1 [Hordeum vulgare subsp. vulgare] sp P35266 RL171 HORVU 60S ribosomal protein L17-1                                                                                                                                                                                                                                                                                                                                                                                                                                                                                                                                                                                                                                                                                                                                               | 170   | 8E-61   |
|                       |                 |                     |                          |                     | >gb AAD39434.2  CENPCA protein [Zea mays]                                                                                                                                                                                                                                                                                                                                                                                                                                                                                                                                                                                                                                                                                                                                                                                                                                 | 701   | 2E-36   |
|                       |                 |                     |                          |                     | >gb AAU04624.1  CENP-C [Sorghum propinquum]                                                                                                                                                                                                                                                                                                                                                                                                                                                                                                                                                                                                                                                                                                                                                                                                                               | 758   | 1E-26   |
|                       |                 |                     |                          |                     | >gb AAU04627.1  CENP-C2 [Saccharum officinarum]                                                                                                                                                                                                                                                                                                                                                                                                                                                                                                                                                                                                                                                                                                                                                                                                                           | 709   | 3E-26   |
|                       |                 |                     |                          |                     | >gb AAU04628.1  CENP-C1 [Saccharum officinarum] gb AAU04626.1  CENP-C1 [Saccharum officinarum]                                                                                                                                                                                                                                                                                                                                                                                                                                                                                                                                                                                                                                                                                                                                                                            | 709   | 3E-26   |
|                       |                 |                     |                          |                     | >gb AAU04623.1  CENP-C [Sorghum bicolor]                                                                                                                                                                                                                                                                                                                                                                                                                                                                                                                                                                                                                                                                                                                                                                                                                                  | 694   | 3E-26   |
| CAB29657              | 6.28E-03        | Mo17<B73=F1         | 1.26                     | 11                  | >emb CAA74307.1  calmodulin [Zea mays] emb CAA46150.1  calmodulin [Oryza sativa] gb AAD10246.1  calmodulin [Phaseolus vulgaris]                                                                                                                                                                                                                                                                                                                                                                                                                                                                                                                                                                                                                                                                                                                                           | 149   | 1E-79   |
|                       |                 |                     |                          |                     | >emb CAA54583.1  calmodulin [Zea mays]                                                                                                                                                                                                                                                                                                                                                                                                                                                                                                                                                                                                                                                                                                                                                                                                                                    | 149   | 3E-79   |
|                       |                 |                     |                          |                     | >ref XP_475464.1  putative calmodulin [Oryza sativa (japonica cultivar-group)] gb AAT69643.1  putative calmodulin [Oryza sativa (japonica cultivar-group)]                                                                                                                                                                                                                                                                                                                                                                                                                                                                                                                                                                                                                                                                                                                | 149   | 3E-79   |
|                       |                 |                     |                          |                     | gb AAL35328.1  calmodulin [Oryza sativa] gb AAC36058.1  calmodulin [Oryza sativa]                                                                                                                                                                                                                                                                                                                                                                                                                                                                                                                                                                                                                                                                                                                                                                                         |       |         |
|                       |                 |                     |                          |                     | >emb CAA36644.1  unnamed protein product [Medicago sativa] gb AAM81203.1  calmodulin 2 [Medicago truncatula] gb AAA34238.1  calmodulin [Vigna radiata]                                                                                                                                                                                                                                                                                                                                                                                                                                                                                                                                                                                                                                                                                                                    |       |         |
|                       |                 |                     |                          |                     | gb AAD10244.1  calmodulin [Phaseolus vulgaris] sp P17928 CALM_MEDSA Calmodulin (CaM) gb AAA34014.1  calmodulin gb AAA34013.1  calmodulin prf 2121384C calmodulin prf 2121384A calmodulin                                                                                                                                                                                                                                                                                                                                                                                                                                                                                                                                                                                                                                                                                  | 149   | 3E-79   |
|                       |                 |                     |                          |                     | >ref NP_912914.1  unnamed protein product [Oryza sativa (japonica cultivar-group)] ref XP_479602.1  calmodulin [Oryza sativa (japonica cultivar-group)]                                                                                                                                                                                                                                                                                                                                                                                                                                                                                                                                                                                                                                                                                                                   |       |         |
|                       |                 |                     |                          |                     | emb CAA78287.1  calmodulin [Oryza sativa (indica cultivar-group)] emb CAA70982.1  CaM protein [Cicer arietinum] gb AAL35329.1  calmodulin [Oryza sativa]                                                                                                                                                                                                                                                                                                                                                                                                                                                                                                                                                                                                                                                                                                                  |       |         |
|                       |                 |                     |                          |                     | gb AAB36130.1  auxin-regulated calmodulin; arCaM [Vigna radiata] dbj BAA88540.1  calmodulin [Oryza sativa (japonica cultivar-group)] gb AAA34237.1  calmodulin [Vigna radiata] dbj BAD30293.1  calmodulin [Oryza sativa (japonica cultivar-group)] dbj BAC10352.1  calmodulin [Oryza sativa (japonica cultivar-group)] sp P62162 CALM_HORVU Calmodulin (CaM) sp P62163 CALM2_SOYBN Calmodulin-2 (CaM-2) gb AAC49587.1  calmodulin TaCaM4-1 gb AAC49586.1  calmodulin TaCaM3-3 gb AAC49585.1  calmodulin TaCaM3-2 gb AAC49584.1  calmodulin TaCaM3-1 gb AAC49580.1  calmodulin TaCaM1-3 gb AAC49579.1  calmodulin TaCaM1-2 gb AAC49578.1  calmodulin TaCaM1-1 gb AAC36059.1  calmodulin [Oryza sativa] sp P29612 CALM_ORYSA Calmodulin (CaM) gb AAA33901.1  calmodulin gb AAA32938.1  calmodulin prf 2121384B calmodulin gb AAA03580.1  calmodulin prf 1604476A calmodulin | 149   | 3E-79   |
| DV550870              | 6.29E-03        | B73<F1=Mo17         | 1.4                      | 2                   | >gb AAL83985.1  putative protein phosphatase 2C [Oryza sativa]                                                                                                                                                                                                                                                                                                                                                                                                                                                                                                                                                                                                                                                                                                                                                                                                            | 130   | 4E-6    |
|                       |                 |                     |                          |                     | >ref XP_465582.1  putative protein phosphatase 2C [Oryza sativa (japonica cultivar-group)] ref XP_506802.1  PREDICTED P0403C01.30 gene product [Oryza sativa (japonica cultivar-group)] dbj BAD19608.1  putative protein phosphatase 2C [Oryza sativa (japonica cultivar-group)] dbj BAD19485.1  putative protein phosphatase 2C [Oryza sativa (japonica cultivar-group)]                                                                                                                                                                                                                                                                                                                                                                                                                                                                                                 | 518   | 4E-6    |
| DV942323              | 6.30E-03        | F1=Mo17<B73         | 2.2                      | 8                   | >ref XP_465161.1  putative nicotianamine aminotransferase A [Oryza sativa (japonica cultivar-group)] dbj BAD23582.1  putative nicotianamine aminotransferase A [Oryza sativa (japonica cultivar-group)]                                                                                                                                                                                                                                                                                                                                                                                                                                                                                                                                                                                                                                                                   | 444   | e-102   |
|                       |                 |                     |                          |                     | >dbj BAA87052.2  nicotianamine aminotransferase A [Hordeum vulgare subsp. vulgare]                                                                                                                                                                                                                                                                                                                                                                                                                                                                                                                                                                                                                                                                                                                                                                                        | 461   | 6E-93   |
|                       |                 |                     |                          |                     | >dbj BAA87055.1  nicotianamine aminotransferase [Hordeum vulgare subsp. vulgare]                                                                                                                                                                                                                                                                                                                                                                                                                                                                                                                                                                                                                                                                                                                                                                                          | 461   | 2E-92   |
|                       |                 |                     |                          |                     | >dbj BAA87054.1  nicotianamine aminotransferase [Hordeum vulgare subsp. vulgare]                                                                                                                                                                                                                                                                                                                                                                                                                                                                                                                                                                                                                                                                                                                                                                                          | 551   | 2E-89   |
|                       |                 |                     |                          |                     | >dbj BAA87053.1  nicotianamine aminotransferase B [Hordeum vulgare subsp. vulgare]                                                                                                                                                                                                                                                                                                                                                                                                                                                                                                                                                                                                                                                                                                                                                                                        | 551   | 2E-89   |
| CB833932              | 6.31E-03        | Mo17<B73            | 1.31                     | 10                  | >emb CAA12028.1  Glyoxalase I [Cicer arietinum] sp O49818 LGUL_CICAR Lactoylglutathione lyase (Methylglyoxalase) (Aldoketomutase) (Glyoxalase I) (Glx I) (Ketone-aldehyde mutase) (S-D-lactoylglutathione methylglyoxal lyase)                                                                                                                                                                                                                                                                                                                                                                                                                                                                                                                                                                                                                                            | 186   | 4E-81   |
|                       |                 |                     |                          |                     | >gb AAK06838.1  glyoxalase I [Avicennia marina]                                                                                                                                                                                                                                                                                                                                                                                                                                                                                                                                                                                                                                                                                                                                                                                                                           | 184   | 5E-80   |
|                       |                 |                     |                          |                     | >ref NP_001030996.1  calmodulin binding / lactoylglutathione lyase [Arabidopsis thaliana]                                                                                                                                                                                                                                                                                                                                                                                                                                                                                                                                                                                                                                                                                                                                                                                 | 235   | 6E-80   |
|                       |                 |                     |                          |                     | >ref NP_849609.1  calmodulin binding / lactoylglutathione lyase [Arabidopsis thaliana] ref NP_172291.1  calmodulin binding / lactoylglutathione lyase [Arabidopsis thaliana] ref NP_001030995.1  calmodulin binding / lactoylglutathione lyase [Arabidopsis thaliana] gb AAT41850.1  At1g08110 [Arabidopsis thaliana]                                                                                                                                                                                                                                                                                                                                                                                                                                                                                                                                                     |       |         |
|                       |                 |                     |                          |                     | gb AAN72031.1  glyoxalase I, putative [Arabidopsis thaliana] sp Q8HOV3 LGUL_ARATH Lactoylglutathione lyase (Methylglyoxalase) (Aldoketomutase) (Glyoxalase I) (Glx I) (Ketone-aldehyde mutase) (S-D-lactoylglutathione methylglyoxal lyase)                                                                                                                                                                                                                                                                                                                                                                                                                                                                                                                                                                                                                               | 185   | 1E-78   |
|                       |                 |                     |                          |                     | >emb CAA73691.1  Glyoxalase I [Brassica juncea] sp O04885 LGUL_BRAJU Lactoylglutathione lyase (Methylglyoxalase) (Aldoketomutase) (Glyoxalase I) (Glx I) (Ketone-aldehyde mutase) (S-D-lactoylglutathione methylglyoxal lyase)                                                                                                                                                                                                                                                                                                                                                                                                                                                                                                                                                                                                                                            | 185   | 3E-78   |
| CB334416              | 6.33E-03        | F1=Mo17<B73         | 1.26                     | 9                   | >ref NP_567410.1  hydrolase/ pyrophosphatase [Arabidopsis thaliana] dbj BAD93787.1  hypothetical protein [Arabidopsis thaliana] gb AAM66934.1  putative HAM1 protein [Arabidopsis thaliana]                                                                                                                                                                                                                                                                                                                                                                                                                                                                                                                                                                                                                                                                               | 206   | 1E-81   |
|                       |                 |                     |                          |                     | >ref NP_921812.1  putative HAM-1-like protein [Oryza sativa (japonica cultivar-group)] gb AAK54301.1  putative HAM1 protein [Oryza sativa (japonica cultivar-group)] gb AAP54099.1  HAM1 protein, putative [Oryza sativa (japonica cultivar-group)]                                                                                                                                                                                                                                                                                                                                                                                                                                                                                                                                                                                                                       | 191   | 2E-81   |
|                       |                 |                     |                          |                     | >dbj BAD94569.1  hypothetical protein [Arabidopsis thaliana]                                                                                                                                                                                                                                                                                                                                                                                                                                                                                                                                                                                                                                                                                                                                                                                                              | 206   | 3E-81   |
|                       |                 |                     |                          |                     | >emb CAB78414.1  putative protein [Arabidopsis thaliana] emb CAB36836.1  putative protein [Arabidopsis thaliana]                                                                                                                                                                                                                                                                                                                                                                                                                                                                                                                                                                                                                                                                                                                                                          | 231   | 8E-75   |
|                       |                 |                     |                          |                     | >ref XP_637700.1  hypothetical protein DDB0215619 [Dictyostelium discoideum] gb EAL64198.1  hypothetical protein DDB0215619 [Dictyostelium discoideum]                                                                                                                                                                                                                                                                                                                                                                                                                                                                                                                                                                                                                                                                                                                    | 194   | 2E-64   |
| CD484263              | 6.35E-03        | Mo17<B73=F1         | 1.32                     | 10                  | ns                                                                                                                                                                                                                                                                                                                                                                                                                                                                                                                                                                                                                                                                                                                                                                                                                                                                        |       |         |
| DV621637              | 6.35E-03        | B73<F1<Mo17         | 1.39                     | 4                   | ns                                                                                                                                                                                                                                                                                                                                                                                                                                                                                                                                                                                                                                                                                                                                                                                                                                                                        |       |         |

**Table 4. Microarray analysis results, mode of gene action classification, and BLAST annotation for the 1,367 ESTs identified as differentially expressed among genotypes (15% FDR)**

| GenBank accession no. | Overall P value | Significant pattern | Fold change <sup>†</sup> | Sector <sup>‡</sup> | BLAST annotation*                                                                                                                                                                                                                                                                                                                                                                                                                                                                                                                                                                                                                                                                                                                                                                                                                                                                                                                                                                                                                                                                                                                                                                                                                                                                                                                                                                                                                                                                                                                                                                                                                                                                | Score                           | E value                                   |
|-----------------------|-----------------|---------------------|--------------------------|---------------------|----------------------------------------------------------------------------------------------------------------------------------------------------------------------------------------------------------------------------------------------------------------------------------------------------------------------------------------------------------------------------------------------------------------------------------------------------------------------------------------------------------------------------------------------------------------------------------------------------------------------------------------------------------------------------------------------------------------------------------------------------------------------------------------------------------------------------------------------------------------------------------------------------------------------------------------------------------------------------------------------------------------------------------------------------------------------------------------------------------------------------------------------------------------------------------------------------------------------------------------------------------------------------------------------------------------------------------------------------------------------------------------------------------------------------------------------------------------------------------------------------------------------------------------------------------------------------------------------------------------------------------------------------------------------------------|---------------------------------|-------------------------------------------|
| DV942972              | 6.41E-03        | F1<B73=Mo17         | 1.67                     | 6                   | ns                                                                                                                                                                                                                                                                                                                                                                                                                                                                                                                                                                                                                                                                                                                                                                                                                                                                                                                                                                                                                                                                                                                                                                                                                                                                                                                                                                                                                                                                                                                                                                                                                                                                               |                                 |                                           |
| BM349773              | 6.42E-03        | Mo17<B73=F1         | 1.39                     | 10                  | >gb AAL99608.1  cytosolic aldehyde dehydrogenase RF2C [Zea mays]<br>>gb AAL99609.1  cytosolic aldehyde dehydrogenase RF2C [Zea mays]<br>>ref NP_917471.1  cytosolic aldehyde dehydrogenase [Oryza sativa (japonica cultivar-group)] dbj BAB55806.1  putative aldehyde dehydrogenase (NAD+) [Oryza sativa (japonica cultivar-group)] dbj BAA96794.1  cytosolic aldehyde dehydrogenase [Oryza sativa (japonica cultivar-group)]                                                                                                                                                                                                                                                                                                                                                                                                                                                                                                                                                                                                                                                                                                                                                                                                                                                                                                                                                                                                                                                                                                                                                                                                                                                    | 502<br>503                      | 2E-7<br>2E-7                              |
| DV492751              | 6.48E-03        | B73<F1=Mo17         | 1.58                     | 3                   | >gb AAO72624.1  putative mitochondrial carrier protein [Oryza sativa (japonica cultivar-group)]<br>>ref NP_177564.2  binding [Arabidopsis thaliana]gb AAO50551.1  putative mitochondrial carrier protein [Arabidopsis thaliana] dbj BAC42286.1  putative mitochondrial carrier protein [Arabidopsis thaliana]<br>>gb AAG52407.1  putative mitochondrial carrier protein; 35518-32968 [Arabidopsisthaliana]<br>>gb EAL21751.1  hypothetical protein CNBC4530 [Cryptococcus neoformans var. neoformans B-3501A]<br>>gb AAW42258.1  mitochondrial inner membrane protein, putative [Cryptococcus neoformans var. neoformans JEC21] ref XP_569565.1  mitochondrial inner membrane protein [Cryptococcus neoformans var. neoformans JEC21]                                                                                                                                                                                                                                                                                                                                                                                                                                                                                                                                                                                                                                                                                                                                                                                                                                                                                                                                            | 502<br>213                      | 9E-6<br>9E-44                             |
| CD651167              | 6.49E-03        | B73<F1=Mo17         | 1.6                      | 3                   | >ref XP_474303.1  OSJNBb0004A17.1 [Oryza sativa (japonica cultivar-group)]<br>>emb CAE03599.2  OSJNBb0004A17.1 [Oryza sativa (japonica cultivar-group)]<br>>ref XP_474302.1  OSJNBa0043A12.39 [Oryza sativa (japonica cultivar-group)]emb CAE02834.1  OSJNBa0043A12.39 [Oryza sativa (japonica cultivar-group)]<br>>gb AAK43885.1  putative protein kinase gb AAD22129 [Arabidopsis thaliana]<br>>ref NP_176759.1  amine oxidase/ oxidoreductase [Arabidopsis thaliana]gb AAN15672.1  putative protein kinase gb AAD22129 [Arabidopsis thaliana]<br>gb AAO85405.1  putative amine oxidase 2 [Arabidopsis thaliana]                                                                                                                                                                                                                                                                                                                                                                                                                                                                                                                                                                                                                                                                                                                                                                                                                                                                                                                                                                                                                                                               | 492<br>496<br>487<br>497        | 1E-83<br>1E-83<br>1E-64<br>6E-52          |
| CD661724              | 6.53E-03        | F1=Mo17<B73         | 1.33                     | 9                   | >emb CAA48638.1  cyclophilin [Zea mays]sp P21569 CYPH_MAIZE Peptidyl-prolyl cis-trans isomerase (PPIase) (Rotamase) (Cyclophilin) (Cyclosporin A-binding protein) gb AAA63403.1  cyclophilin<br>>ref XP_463914.1  peptidylprolyl isomerase Cyp2 [Oryza sativa (japonica cultivar-group)] ref XP_506694.1  PREDICTED OSJNBb0088N06.23 gene product [Oryza sativa (japonica cultivar-group)] dbj BAD07601.1  peptidylprolyl isomerase Cyp2 [Oryza sativa (japonica cultivar-group)] dbj BAD08141.1  peptidylprolyl isomerase Cyp2 [Oryza sativa (japonica cultivar-group)] gb AAA57045.1  cyclophilin 2<br>>gb AAK49427.1  cyclophilin A-2 [Triticum aestivum]gb AAS17067.1  cyclophilin A [Triticum aestivum]<br>>gb AAK49428.1  cyclophilin A-3 [Triticum aestivum]gb AAK49426.1  cyclophilin A-1 [Triticum aestivum]<br>>gb AAA57046.1  cyclophilin 2                                                                                                                                                                                                                                                                                                                                                                                                                                                                                                                                                                                                                                                                                                                                                                                                                           | 172<br>171<br>171<br>172        | 1E-86<br>3E-75<br>5E-75<br>7E-75<br>2E-74 |
| CD001172              | 6.54E-03        | Mo17<B73=F1         | 1.32                     | 10                  | >dbj BAD87555.1  unknown protein [Oryza sativa (japonica cultivar-group)]<br>>ref NP_915142.1  B1078G07.36 [Oryza sativa (japonica cultivar-group)]dbj BAC06256.1  P0696G06.13 [Oryza sativa (japonica cultivar-group)]<br>>ref NP_973568.1  unknown protein [Arabidopsis thaliana]ref NP_565704.1  unknown protein [Arabidopsis thaliana] gb AAM16185.1  At2g30700/T11J7.9 [Arabidopsis thaliana] gb AAM14829.1  Expressed protein [Arabidopsis thaliana] gb AAL06467.1  At2g30700/T11J7.9 [Arabidopsis thaliana]                                                                                                                                                                                                                                                                                                                                                                                                                                                                                                                                                                                                                                                                                                                                                                                                                                                                                                                                                                                                                                                                                                                                                               | 229<br>356                      | 2E-51<br>3E-31                            |
| DV550262              | 6.57E-03        | B73<F1=Mo17         | 1.38                     | 2                   | >ref NP_911519.1  ADP-ribosylation factor 1 [Oryza sativa (japonica cultivar-group)]ref NP_911517.1  ADP-ribosylation factor 1 [Oryza sativa (japonica cultivar-group)] dbj BAD31195.1  ADP-ribosylation factor 1 [Oryza sativa (japonica cultivar-group)] dbj BAC45192.1  ADP-ribosylation factor 1 [Oryza sativa (japonica cultivar-group)] dbj BAC06914.1  ADP-ribosylation factor 1 [Oryza sativa (japonica cultivar-group)] gb AAB65432.1  ADP-ribosylation factor 1 [Oryza sativa (japonica cultivar-group)]<br>>gb AAF65512.1  ADP-ribosylation factor [Capsicum annuum]gb AAR03592.1  ARF-like small GTPase [Brassica juncea]<br>>ref NP_182239.1  ARF1 (ADP-RIBOSYLATION FACTOR 1); GTP binding [Arabidopsisthaliana] gb AAM98296.1  At2g47170/T3D7.2 [Arabidopsis thaliana] gb AAM15469.1  ADP-ribosylation factor 1 [Arabidopsis thaliana] gb AAB63817.1  ADP-ribosylation factor 1 [Arabidopsis thaliana] gb AAL75910.1  At2g47170/T3D7.2 [Arabidopsis thaliana] gb AAM64892.1  ADP-ribosylation factor 1 [Arabidopsis thaliana] sp P36397 ARF1_ARATH ADP-ribosylation factor 1 gb AAA32729.1  ADP-ribosylation factor<br>>gb ABA40455.1  ARF-like small GTPase-like protein [Solanum tuberosum]gb ABC01907.1  ARF-like small GTPase-like protein [Solanum tuberosum] group]                                                                                                                                                                                                                                                                                                                                                                                         | 181<br>181                      | 3E-97<br>4E-96                            |
| DV491472              | 6.58E-03        | Mo17<B73            | 1.52                     | 9                   | >sp Q9LSU1 PSA5_ORYSA Proteasome subunit alpha type 5 (20S proteasome alpha subunit E)(20S proteasome subunit alpha-5) gb ABA94696.1  proteasome subunit alpha type 5 [Oryza sativa (japonica cultivar-group)] dbj BAA96832.1  alpha 5 subunit of 20S proteasome [Oryza sativa (japonica cultivar-group)]<br>>ref NP_175788.1  PAE1; endopeptidase/ peptidase/ threonine endopeptidase[Arabidopsis thaliana] gb AAM47935.1  20S proteasome subunit PAE1 [Arabidopsis thaliana] gb AAL62363.1  20S proteasome subunit PAE1 [Arabidopsis thaliana] gb AAM63255.1  Proteasome subunit alpha type 5-1 (20S proteasome alpha subunit E1) [Arabidopsis thaliana] gb AAF02858.1  20S proteasome subunit PAE1 [Arabidopsis thaliana] gb AAC32060.1  20S proteasome subunit PAE1 [Arabidopsis thaliana] sp O81149 PSA5A_ARATH Proteasome subunit alpha type 5-A (20S proteasome alpha subunit E-1)<br>>gb AAF70292.1  20S proteasome subunit [Glycine max]sp Q9M4T8 PSA5_SOYBN Proteasome subunit alpha type 5 (20S proteasome alpha subunit E) (20S proteasome subunit alpha-5)<br>>ref NP_188046.1  PAE2; endopeptidase/ peptidase/ threonine endopeptidase[Arabidopsis thaliana] gb AAL33816.1  putative 20S proteasome subunit PAE2 [Arabidopsis thaliana] gb AAK44060.1  putative 20S proteasome subunit PAE2 [Arabidopsis thaliana] dbj BAB01035.1  20S proteasome subunit PAE-like protein [Arabidopsis thaliana] gb AAC32061.1  20S proteasome subunit PAE2 [Arabidopsis thaliana] sp Q42134 PSA5B_ARATH Proteasome subunit alpha type 5-B (20S proteasome alpha subunit E-2) (Proteasome component Z)<br>>emb CAD10778.1  20S proteasome subunit alpha V [Physcomitrella patens] | 237<br>237<br>237<br>237<br>237 | 6E-61<br>2E-59<br>3E-59<br>5E-59<br>2E-51 |



**Table 4. Microarray analysis results, mode of gene action classification, and BLAST annotation for the 1,367 ESTs identified as differentially expressed among genotypes (15% FDR)**

| GenBank accession no.                                                                              | Overall P value | Significant pattern | Fold change <sup>†</sup> | Sector <sup>‡</sup> | BLAST annotation*                                                                                                                                                                                                                                                                                                                                                                                                                                                                                                                                                          | Score | E value |
|----------------------------------------------------------------------------------------------------|-----------------|---------------------|--------------------------|---------------------|----------------------------------------------------------------------------------------------------------------------------------------------------------------------------------------------------------------------------------------------------------------------------------------------------------------------------------------------------------------------------------------------------------------------------------------------------------------------------------------------------------------------------------------------------------------------------|-------|---------|
| CA829351                                                                                           | 6.58E-03        | B73<F1=Mo17         | 1.27                     | 3                   | >gb AAK40307.1  putative methyl-binding domain protein MBD105 [Zea mays]                                                                                                                                                                                                                                                                                                                                                                                                                                                                                                   | 433   | 2E-58   |
|                                                                                                    |                 |                     |                          |                     | >gb AAK40308.1  putative methyl-binding domain protein MBD106 [Zea mays]                                                                                                                                                                                                                                                                                                                                                                                                                                                                                                   | 428   | 3E-35   |
|                                                                                                    |                 |                     |                          |                     | >gb ABA99897.1  methyl-binding domain protein MBD106, putative [Oryza sativa(japonica cultivar-group)]                                                                                                                                                                                                                                                                                                                                                                                                                                                                     | 303   | 3E-29   |
|                                                                                                    |                 |                     |                          |                     | >gb AAW56447.1  putative methyl-binding domain protein MBD115 [Zea mays]                                                                                                                                                                                                                                                                                                                                                                                                                                                                                                   | 364   | 7E-8    |
|                                                                                                    |                 |                     |                          |                     | >gb AAM93219.1  methyl binding domain protein MBD109 [Zea mays]                                                                                                                                                                                                                                                                                                                                                                                                                                                                                                            | 400   | 4E-6    |
| DV550515                                                                                           | 6.59E-03        | Mo17<B73=F1         | 2.26                     | 10                  | >ref NP_912350.1  unknown protein [Oryza sativa (japonica cultivar-group)]gb AAP06874.1  unknown protein [Oryza sativa (japonica cultivar-group)]                                                                                                                                                                                                                                                                                                                                                                                                                          | 144   | 5E-58   |
|                                                                                                    |                 |                     |                          |                     | gb AAP06842.1  unknown protein [Oryza sativa (japonica cultivar-group)]                                                                                                                                                                                                                                                                                                                                                                                                                                                                                                    | 166   | 3E-27   |
|                                                                                                    |                 |                     |                          |                     | >gb AAV59350.1  unknown protein [Oryza sativa (japonica cultivar-group)]ref XP_475341.1  unknown protein [Oryza sativa (japonica cultivar-group)]                                                                                                                                                                                                                                                                                                                                                                                                                          | 173   | 1E-18   |
|                                                                                                    |                 |                     |                          |                     | >ref NP_195447.1  unknown protein [Arabidopsis thaliana]emb CAB16754.1  putative protein [Arabidopsis thaliana] emb CAB80396.1  putative protein [Arabidopsis thaliana] gb AAL33781.1  unknown protein [Arabidopsis thaliana] gb AAK44007.1  unknown protein [Arabidopsis thaliana] gb AAL06813.1  AT4g37300/C7A10_60 [Arabidopsis thaliana] gb AAK62646.1  AT4g37300/C7A10_60 [Arabidopsis thaliana]                                                                                                                                                                      | 173   | 1E-18   |
|                                                                                                    |                 |                     |                          |                     | >gb AAM95942.1  nucleosome/chromatin assembly factor group D protein [Zea mays]emb CAA41220.1  high mobility group protein [Zea mays]                                                                                                                                                                                                                                                                                                                                                                                                                                      | 157   | 2E-17   |
| CB604338                                                                                           | 6.60E-03        | Mo17<B73=F1         | 1.2                      | 11                  | emb CAB46752.1  HMGa protein [Zea mays] sp P27347 MNB1B MAIZE DNA-binding protein MNB1B (HMG1-like protein)                                                                                                                                                                                                                                                                                                                                                                                                                                                                | 168   | 2E-17   |
|                                                                                                    |                 |                     |                          |                     | >emb CAA46876.1  DNA-binding protein [Zea mays]pir T03640 high mobility group protein MNB1b - maize (fragment)                                                                                                                                                                                                                                                                                                                                                                                                                                                             | 157   | 3E-16   |
|                                                                                                    |                 |                     |                          |                     | >gb AAP21609.1  HMGB1 [Oryza sativa (indica cultivar-group)]gb AAN28722.1  HMG1 protein [Oryza sativa (indica cultivar-group)] dbj BAD61823.1  HMGB1 [Oryza sativa (japonica cultivar-group)] gb AAC78104.1  high mobility group protein [Oryza sativa]                                                                                                                                                                                                                                                                                                                    | 161   | 1E-15   |
|                                                                                                    |                 |                     |                          |                     | >emb CAA77641.1  high mobility group protein [Triticum aestivum]sp P40621 HMGL WHEAT HMG1/2-like protein                                                                                                                                                                                                                                                                                                                                                                                                                                                                   | 160   | 8E-15   |
|                                                                                                    |                 |                     |                          |                     | >emb CAA90679.1  HMG1/2-like protein [Hordeum vulgare subsp. vulgare]                                                                                                                                                                                                                                                                                                                                                                                                                                                                                                      | 960   | 9E-91   |
| CB604128                                                                                           | 6.64E-03        | Mo17<B73=F1         | 1.36                     | 10                  | >dbj BAA28170.1  phosphoenolpyruvate carboxylase [Zea mays]                                                                                                                                                                                                                                                                                                                                                                                                                                                                                                                | 960   | 8E-89   |
|                                                                                                    |                 |                     |                          |                     | >emb CAA46267.1  phosphoenolpyruvate carboxylase [Sorghum bicolor]emb CAA39197.1  phosphoenolpyruvate carboxylase [Sorghum bicolor]                                                                                                                                                                                                                                                                                                                                                                                                                                        | 961   | 5E-88   |
|                                                                                                    |                 |                     |                          |                     | sp P29195 CAPP1 SORBI Phosphoenolpyruvate carboxylase 1 (PEPCase 1) (PEPC1) (CP21)                                                                                                                                                                                                                                                                                                                                                                                                                                                                                         | 961   | 2E-87   |
|                                                                                                    |                 |                     |                          |                     | >gb AAR84575.1  C3 phosphoenolpyruvate carboxylase [Setaria italica]                                                                                                                                                                                                                                                                                                                                                                                                                                                                                                       | 968   | 1E-86   |
|                                                                                                    |                 |                     |                          |                     | >gb AAP06951.1  phosphoenolpyruvate carboxylase [Echinochloa crus-galli]                                                                                                                                                                                                                                                                                                                                                                                                                                                                                                   |       |         |
| >dbj BAD27732.1  putative phosphoenolpyruvate carboxylase [Oryza sativa (japonica cultivar-group)] |                 |                     |                          |                     |                                                                                                                                                                                                                                                                                                                                                                                                                                                                                                                                                                            |       |         |
| DV495744                                                                                           | 6.69E-03        | B73<F1=Mo17         | 1.74                     | 3                   | ns                                                                                                                                                                                                                                                                                                                                                                                                                                                                                                                                                                         |       |         |
| DV550664                                                                                           | 6.72E-03        | B73<F1<Mo17         | 1.51                     | 4                   | >ref XP_474333.1  OSJNBa0018M05.20 [Oryza sativa (japonica cultivar-group)]emb CAE03245.2  OSJNBa0018M05.20 [Oryza sativa (japonica cultivar-group)]                                                                                                                                                                                                                                                                                                                                                                                                                       | 721   | e-118   |
|                                                                                                    |                 |                     |                          |                     | >ref NP_174675.2  STT3B (STAUROSPORIN AND TEMPERATURE SENSITIVE 3-LIKE B);oligosaccharyl transferase [Arabidopsis thaliana] gb AAG12524.1  Putative integral membrane protein [Arabidopsis thaliana]                                                                                                                                                                                                                                                                                                                                                                       | 735   | e-111   |
|                                                                                                    |                 |                     |                          |                     | >gb EAA06273.3  ENSANGP00000020753 [Anopheles gambiae str. PEST]ref XP_310665.2  ENSANGP00000020753 [Anopheles gambiae str. PEST]                                                                                                                                                                                                                                                                                                                                                                                                                                          | 715   | 7E-85   |
|                                                                                                    |                 |                     |                          |                     | >ref XP_392786.2  PREDICTED: similar to CG1518-PA [Apis mellifera]                                                                                                                                                                                                                                                                                                                                                                                                                                                                                                         | 705   | 8E-84   |
|                                                                                                    |                 |                     |                          |                     | >ref NP_608425.1  CG1518-PA [Drosophila melanogaster]gb AAF50861.1  CG1518-PA [Drosophila melanogaster]                                                                                                                                                                                                                                                                                                                                                                                                                                                                    | 713   | 1E-83   |
| BM333923                                                                                           | 6.72E-03        | F1=Mo17<B73         | 1.53                     | 9                   | >dbj BAD69166.1  putative somatic embryogenesis protein kinase 1 [Oryza sativa(japonica cultivar-group)] dbj BAB19337.1  putative somatic embryogenesis protein kinase 1 [Oryza sativa (japonica cultivar-group)]                                                                                                                                                                                                                                                                                                                                                          | 640   | 7E-17   |
|                                                                                                    |                 |                     |                          |                     | >emb CAB79770.1  receptor-like kinase homolog [Arabidopsis thaliana]                                                                                                                                                                                                                                                                                                                                                                                                                                                                                                       | 573   | 8E-16   |
|                                                                                                    |                 |                     |                          |                     | >dbj BAB01326.1  receptor-like kinase [Arabidopsis thaliana]                                                                                                                                                                                                                                                                                                                                                                                                                                                                                                               | 630   | 4E-14   |
|                                                                                                    |                 |                     |                          |                     | >ref NP_189183.2  ATP binding / protein kinase/ protein serine/threonine kinase/protein-tyrosine kinase [Arabidopsis thaliana] gb AAL91629.1  AT3g25560/MWL2_18 [Arabidopsis thaliana] gb AAO11535.1  At3g25560/MWL2_18 [Arabidopsis thaliana]                                                                                                                                                                                                                                                                                                                             | 635   | 4E-14   |
|                                                                                                    |                 |                     |                          |                     | >gb AAM65586.1  receptor protein kinase-like protein [Arabidopsis thaliana]                                                                                                                                                                                                                                                                                                                                                                                                                                                                                                | 629   | 6E-14   |
| DV490752                                                                                           | 6.73E-03        | Mo17<B73=F1         | 2.25                     | 10                  | ns                                                                                                                                                                                                                                                                                                                                                                                                                                                                                                                                                                         |       |         |
| rld2                                                                                               | 6.77E-03        | B73<F1=Mo17         | 1.27                     | 3                   | ns                                                                                                                                                                                                                                                                                                                                                                                                                                                                                                                                                                         |       |         |
| CB833668                                                                                           | 6.81E-03        | B73<Mo17            | 1.41                     | 3                   | >ref XP_472198.1  OSJNBb0006N15.13 [Oryza sativa (japonica cultivar-group)]emb CAE04596.2  OSJNBb0006N15.13 [Oryza sativa (japonica cultivar-group)]                                                                                                                                                                                                                                                                                                                                                                                                                       | 347   | 3E-51   |
|                                                                                                    |                 |                     |                          |                     | >ref NP_973808.1  TIF3H1; translation initiation factor [Arabidopsis thaliana]                                                                                                                                                                                                                                                                                                                                                                                                                                                                                             | 250   | 4E-40   |
|                                                                                                    |                 |                     |                          |                     | >ref NP_563880.1  TIF3H1; translation initiation factor [Arabidopsis thaliana]gb AAN31904.1  putative translation initiation factor [Arabidopsis thaliana]                                                                                                                                                                                                                                                                                                                                                                                                                 |       |         |
|                                                                                                    |                 |                     |                          |                     | gb AAM10108.1  unknown protein [Arabidopsis thaliana] gb AAK96832.1  Unknown protein [Arabidopsis thaliana] gb AAM64888.1  putative translation initiation factor [Arabidopsis thaliana] gb AAD31329.1  Similar to gb U54559 eIF3-p40 subunit from Homo sapiens and is a member of the PF01398 Mov34 family. ESTs gb N96623 and gb N07519 come from this gene. [Arabidopsis thaliana] pir B86242 hypothetical protein [imported] - Arabidopsis thaliana sp Q9C5Z2 IF33 ARATH Eukaryotic translation initiation factor 3 subunit 3 (eIF-3 gamma) (eIF3 p38 subunit) (eIF3h) | 337   | 4E-40   |
|                                                                                                    |                 |                     |                          |                     | >gb AAG53614.1  eukaryotic initiation factor 3H1 subunit [Arabidopsis thaliana]                                                                                                                                                                                                                                                                                                                                                                                                                                                                                            | 337   | 4E-40   |
| >gb AAH87438.1  LOC496043 protein [Xenopus laevis]                                                 | 334             | 7E-13               |                          |                     |                                                                                                                                                                                                                                                                                                                                                                                                                                                                                                                                                                            |       |         |
| AY501430                                                                                           | 6.82E-03        | B73<F1=Mo17         | 1.27                     | 3                   | >gb AAR97952.1  rolled leaf1 [Zea mays]                                                                                                                                                                                                                                                                                                                                                                                                                                                                                                                                    | 840   | 0E+0    |
|                                                                                                    |                 |                     |                          |                     | >gb AAR04340.1  homeodomain leucine-zipper protein Hox10 [Oryza sativa (japonica cultivar-group)]                                                                                                                                                                                                                                                                                                                                                                                                                                                                          | 839   | 0E+0    |
|                                                                                                    |                 |                     |                          |                     | >ref XP_468564.1  Putative homeodomain-leucine zipper protein [Oryza sativa (japonica cultivar-group)] gb AAN61485.1  Putative homeodomain-leucine zipper protein [Oryza sativa (japonica cultivar-group)]                                                                                                                                                                                                                                                                                                                                                                 | 857   | 0E+0    |

**Table 4. Microarray analysis results, mode of gene action classification, and BLAST annotation for the 1,367 ESTs identified as differentially expressed among genotypes (15% FDR)**

| GenBank accession no. | Overall P value | Significant pattern | Fold change <sup>‡</sup> | Sector <sup>‡</sup> | BLAST annotation*                                                                                                                                                                                                                                                                                                                                                                                                                                                                                                                                                                                                                                                                                                                                                                                                                                                                                                                                                                                                                                                                                                               | Score | E value |
|-----------------------|-----------------|---------------------|--------------------------|---------------------|---------------------------------------------------------------------------------------------------------------------------------------------------------------------------------------------------------------------------------------------------------------------------------------------------------------------------------------------------------------------------------------------------------------------------------------------------------------------------------------------------------------------------------------------------------------------------------------------------------------------------------------------------------------------------------------------------------------------------------------------------------------------------------------------------------------------------------------------------------------------------------------------------------------------------------------------------------------------------------------------------------------------------------------------------------------------------------------------------------------------------------|-------|---------|
|                       |                 |                     |                          |                     | >ref NP_922012.1  putative homeodomain leucine zipper protein [Oryza sativa (japonica cultivar-group)] gb AAK21338.1  putative homeodomain-leucine zipper protein [Oryza sativa (japonica cultivar-group)] gb ABB47795.1  homeodomain-leucine zipper protein, putative [Oryza sativa (japonica cultivar-group)] gb AAP54299.1  homeodomain-leucine zipper protein, putative [Oryza sativa (japonica cultivar-group)]                                                                                                                                                                                                                                                                                                                                                                                                                                                                                                                                                                                                                                                                                                            | 840   | 0E+0    |
|                       |                 |                     |                          |                     | >gb AAQ98963.1  homeodomain leucine-zipper protein Hox9 [Oryza sativa (japonica cultivar-group)]                                                                                                                                                                                                                                                                                                                                                                                                                                                                                                                                                                                                                                                                                                                                                                                                                                                                                                                                                                                                                                | 840   | 0E+0    |
| AI738263              | 6.83E-03        | B73=F1<Mo17         | 1.68                     | 4                   | >ref XP_470035.1  putative endosperm C-24 sterol methyltransferase [Oryza sativa(japonica cultivar-group)] gb AAP21419.1  putative endosperm C-24 sterol methyltransferase [Oryza sativa (japonica cultivar-group)]                                                                                                                                                                                                                                                                                                                                                                                                                                                                                                                                                                                                                                                                                                                                                                                                                                                                                                             | 330   | 1E-10   |
|                       |                 |                     |                          |                     | >gb AAZ83345.1  24-sterol C-methyltransferase [Gossypium hirsutum]                                                                                                                                                                                                                                                                                                                                                                                                                                                                                                                                                                                                                                                                                                                                                                                                                                                                                                                                                                                                                                                              | 346   | 3E-9    |
|                       |                 |                     |                          |                     | >gb AAB37769.1  delta-24-sterol methyltransferase [Triticum aestivum]                                                                                                                                                                                                                                                                                                                                                                                                                                                                                                                                                                                                                                                                                                                                                                                                                                                                                                                                                                                                                                                           | 363   | 7E-9    |
|                       |                 |                     |                          |                     | >gb AAB49338.1  delta-24-sterol methyltransferase [Triticum aestivum]                                                                                                                                                                                                                                                                                                                                                                                                                                                                                                                                                                                                                                                                                                                                                                                                                                                                                                                                                                                                                                                           | 363   | 1E-8    |
|                       |                 |                     |                          |                     | >gb AAB70886.1  endosperm C-24 sterol methyltransferase [Zea mays]                                                                                                                                                                                                                                                                                                                                                                                                                                                                                                                                                                                                                                                                                                                                                                                                                                                                                                                                                                                                                                                              | 344   | 2E-8    |
| BM339393              | 6.85E-03        | Mo17<B73=F1         | 1.67                     | 11                  | >ref XP_507493.1  PREDICTED OJ1058_F07.21 gene product [Oryza sativa (japonica cultivar-group)] ref XP_466627.1  putative glycine-rich protein [Oryza sativa (japonica cultivar-group)] ref XP_506857.1  PREDICTED OJ1058_F07.21 gene product [Oryza sativa (japonica cultivar-group)] dbj BAD19331.1  putative glycine-rich protein [Oryza sativa (japonica cultivar-group)]                                                                                                                                                                                                                                                                                                                                                                                                                                                                                                                                                                                                                                                                                                                                                   | 250   | 1E-62   |
|                       |                 |                     |                          |                     | >ref XP_473006.1  OSJNBb0091E11.5 [Oryza sativa (japonica cultivar-group)]emb CAD41536.2  OSJNBb0091E11.5 [Oryza sativa (japonica cultivar-group)]                                                                                                                                                                                                                                                                                                                                                                                                                                                                                                                                                                                                                                                                                                                                                                                                                                                                                                                                                                              | 337   | 2E-39   |
|                       |                 |                     |                          |                     | >ref NP_850396.1  unknown protein [Arabidopsis thaliana]gb AAM20106.1  unknown protein [Arabidopsis thaliana] gb AAL38892.1  unknown protein [Arabidopsis thaliana]                                                                                                                                                                                                                                                                                                                                                                                                                                                                                                                                                                                                                                                                                                                                                                                                                                                                                                                                                             | 274   | 4E-15   |
|                       |                 |                     |                          |                     | >gb AAB64043.1  unknown protein [Arabidopsis thaliana]                                                                                                                                                                                                                                                                                                                                                                                                                                                                                                                                                                                                                                                                                                                                                                                                                                                                                                                                                                                                                                                                          | 174   | 4E-15   |
|                       |                 |                     |                          |                     | >ref NP_191523.1  unknown protein [Arabidopsis thaliana]emb CAB75461.1  putative protein [Arabidopsis thaliana] gb AAK62385.1  putative protein [Arabidopsis thaliana] gb AAN65060.1  putative protein [Arabidopsis thaliana]                                                                                                                                                                                                                                                                                                                                                                                                                                                                                                                                                                                                                                                                                                                                                                                                                                                                                                   | 246   | 5E-12   |
| BM075199              | 6.87E-03        | Mo17<B73=F1         | 1.33                     | 10                  | >ref XP_477314.1  unknown protein [Oryza sativa (japonica cultivar-group)]dbj BAC83023.1  unknown protein [Oryza sativa (japonica cultivar-group)] dbj BAD31296.1  unknown protein [Oryza sativa (japonica cultivar-group)]                                                                                                                                                                                                                                                                                                                                                                                                                                                                                                                                                                                                                                                                                                                                                                                                                                                                                                     | 252   | 2E-21   |
|                       |                 |                     |                          |                     | >ref NP_173557.2  unknown protein [Arabidopsis thaliana]ref NP_849694.1  unknown protein [Arabidopsis thaliana] gb AAT71985.1  At1g21350 [Arabidopsis thaliana] gb AAO22789.1  unknown protein [Arabidopsis thaliana]                                                                                                                                                                                                                                                                                                                                                                                                                                                                                                                                                                                                                                                                                                                                                                                                                                                                                                           | 151   | 1E-19   |
|                       |                 |                     |                          |                     | >ref NP_973876.1  unknown protein [Arabidopsis thaliana]gb AAF87891.1  Hypothetical protein [Arabidopsis thaliana]                                                                                                                                                                                                                                                                                                                                                                                                                                                                                                                                                                                                                                                                                                                                                                                                                                                                                                                                                                                                              | 252   | 1E-19   |
|                       |                 |                     |                          |                     | >emb CAE18742.1  conserved hypothetical protein [Prochlorococcus marinus subsp.pastoris str. CCMP1986] ref NP_892402.1  hypothetical protein PMM0283 [Prochlorococcus marinus subsp. pastoris str. CCMP1986]                                                                                                                                                                                                                                                                                                                                                                                                                                                                                                                                                                                                                                                                                                                                                                                                                                                                                                                    | 197   | 2E-10   |
|                       |                 |                     |                          |                     | >gb ABB49346.1  conserved hypothetical protein [Prochlorococcus marinus str. MIT9312] ref YP_396782.1  hypothetical protein PMT9312_0285 [Prochlorococcus marinus str. MIT 9312]                                                                                                                                                                                                                                                                                                                                                                                                                                                                                                                                                                                                                                                                                                                                                                                                                                                                                                                                                | 197   | 1E-9    |
| CB381444              | 6.87E-03        | B73=Mo17<F1         | 1.26                     | 12                  | >gb AAQ17040.2  pollen 2-phosphoglycerate dehydrogenase 2 precursor [Cynodon dactylon] gb AAD04187.1  enolase [Zea mays] sp P42895 ENO2_MAIZE Enolase 2 (2-phosphoglycerate dehydratase 2) (2-phospho-D-glycerate hydro-lyase 2)                                                                                                                                                                                                                                                                                                                                                                                                                                                                                                                                                                                                                                                                                                                                                                                                                                                                                                | 446   | 6E-92   |
|                       |                 |                     |                          |                     | >gb AAP94211.1  enolase [Oryza sativa (japonica cultivar-group)]                                                                                                                                                                                                                                                                                                                                                                                                                                                                                                                                                                                                                                                                                                                                                                                                                                                                                                                                                                                                                                                                | 446   | 1E-87   |
|                       |                 |                     |                          |                     | >ref NP_920013.1  putative enolase (2-phospho-D-glycerate hydrolyase) [Oryza sativa(japonica cultivar-group)] gb AAN04181.1  Putative enolase (2-phospho-D-glycerate hydrolyase) [Oryza sativa (japonica cultivar-group)]                                                                                                                                                                                                                                                                                                                                                                                                                                                                                                                                                                                                                                                                                                                                                                                                                                                                                                       | 428   | 1E-87   |
|                       |                 |                     |                          |                     | >gb ABB46862.1  enolase [Oryza sativa (japonica cultivar-group)]                                                                                                                                                                                                                                                                                                                                                                                                                                                                                                                                                                                                                                                                                                                                                                                                                                                                                                                                                                                                                                                                | 461   | 1E-87   |
|                       |                 |                     |                          |                     | >gb ABB46861.1  enolase [Oryza sativa (japonica cultivar-group)]                                                                                                                                                                                                                                                                                                                                                                                                                                                                                                                                                                                                                                                                                                                                                                                                                                                                                                                                                                                                                                                                | 461   | 1E-87   |
| DV490553              | 6.90E-03        | Mo17<B73=F1         | 1.72                     | 10                  | >gb AAT76373.1  putative Mob1/phocein family protein [Oryza sativa (japonica cultivar-group)]                                                                                                                                                                                                                                                                                                                                                                                                                                                                                                                                                                                                                                                                                                                                                                                                                                                                                                                                                                                                                                   | 190   | 3E-40   |
|                       |                 |                     |                          |                     | >ref XP_463026.1  putative Mob1-like protein [Oryza sativa (japonica cultivar-group)]gb AAR10852.1  putative Mob1-like protein [Oryza sativa (japonica cultivar-group)]                                                                                                                                                                                                                                                                                                                                                                                                                                                                                                                                                                                                                                                                                                                                                                                                                                                                                                                                                         | 214   | 3E-40   |
|                       |                 |                     |                          |                     | >gb AAP45180.1  unknown [Solanum bulbocastanum]                                                                                                                                                                                                                                                                                                                                                                                                                                                                                                                                                                                                                                                                                                                                                                                                                                                                                                                                                                                                                                                                                 | 218   | 2E-39   |
|                       |                 |                     |                          |                     | >gb AAP45162.1  putative Mob1/phocein family protein [Solanum bulbocastanum]                                                                                                                                                                                                                                                                                                                                                                                                                                                                                                                                                                                                                                                                                                                                                                                                                                                                                                                                                                                                                                                    | 215   | 2E-39   |
|                       |                 |                     |                          |                     | >gb AAP12863.1  At4g19050 [Arabidopsis thaliana]dbj BAC42011.1  unknown protein [Arabidopsis thaliana]                                                                                                                                                                                                                                                                                                                                                                                                                                                                                                                                                                                                                                                                                                                                                                                                                                                                                                                                                                                                                          | 215   | 4E-39   |
| BM079918              | 6.91E-03        | B73<F1=Mo17         | 1.69                     | 3                   | ns                                                                                                                                                                                                                                                                                                                                                                                                                                                                                                                                                                                                                                                                                                                                                                                                                                                                                                                                                                                                                                                                                                                              |       |         |
| BM349041              | 6.92E-03        | Mo17<B73=F1         | 1.31                     | 10                  | >gb AAK16543.1  9S ribosomal protein [Zea mays]gb AAK16544.1  9S ribosomal protein [Zea mays]                                                                                                                                                                                                                                                                                                                                                                                                                                                                                                                                                                                                                                                                                                                                                                                                                                                                                                                                                                                                                                   | 221   | 6E-79   |
|                       |                 |                     |                          |                     | >gb AAT85048.1  putative 9S ribosomal protein [Oryza sativa (japonica cultivar-group)] gb AAR87317.1  ribosomal protein S9 [Oryza sativa (japonica cultivar-group)] dbj BA82395.1  ribosomal protein S9 [Oryza sativa (japonica cultivar-group)]                                                                                                                                                                                                                                                                                                                                                                                                                                                                                                                                                                                                                                                                                                                                                                                                                                                                                | 223   | 2E-72   |
|                       |                 |                     |                          |                     | >ref NP_177635.1  RPS9 (RIBOSOMAL PROTEIN S9); structural constituent of ribosome[Arabidopsis thaliana] gb AAK06869.1  putative ribosomal protein S9 [Arabidopsis thaliana] gb AAM14321.1  putative ribosomal protein S9 [Arabidopsis thaliana] gb AAK76530.1  putative ribosomal protein S9 [Arabidopsis thaliana] gb AAK73958.1  ATg74970/F25A4.6 [Arabidopsis thaliana] gb AAM63421.1  ribosomal protein S9, putative [Arabidopsis thaliana] dbj BAD44621.1  putative ribosomal protein S9 [Arabidopsis thaliana] dbj BAD44560.1  putative ribosomal protein S9 [Arabidopsis thaliana] dbj BAD44553.1  putative ribosomal protein S9 [Arabidopsis thaliana] dbj BAD44536.1  putative ribosomal protein S9 [Arabidopsis thaliana] dbj BAD44521.1  putative ribosomal protein S9 [Arabidopsis thaliana] dbj BAD44517.1  putative ribosomal protein S9 [Arabidopsis thaliana] dbj BAD44459.1  putative ribosomal protein S9 [Arabidopsis thaliana] dbj BAD44131.1  putative ribosomal protein S9 [Arabidopsis thaliana] dbj BAD43731.1  putative ribosomal protein S9 [Arabidopsis thaliana] dbj BAD43658.1  putative ribosomal | 208   | 5E-59   |
|                       |                 |                     |                          |                     | >dbj BAD44402.1  putative ribosomal protein S9 [Arabidopsis thaliana]                                                                                                                                                                                                                                                                                                                                                                                                                                                                                                                                                                                                                                                                                                                                                                                                                                                                                                                                                                                                                                                           | 208   | 1E-58   |
|                       |                 |                     |                          |                     | >dbj BAD43279.1  putative ribosomal protein S9 [Arabidopsis thaliana]                                                                                                                                                                                                                                                                                                                                                                                                                                                                                                                                                                                                                                                                                                                                                                                                                                                                                                                                                                                                                                                           | 208   | 1E-58   |

**Table 4. Microarray analysis results, mode of gene action classification, and BLAST annotation for the 1,367 ESTs identified as differentially expressed among genotypes (15% FDR)**

| GenBank accession no.                                                                                                                                                                                                                                                                                                             | Overall P value | Significant pattern | Fold change <sup>†</sup> | Sector <sup>‡</sup> | BLAST annotation*                                                                                                                                                                                                                                                                                                                                              | Score | E value |
|-----------------------------------------------------------------------------------------------------------------------------------------------------------------------------------------------------------------------------------------------------------------------------------------------------------------------------------|-----------------|---------------------|--------------------------|---------------------|----------------------------------------------------------------------------------------------------------------------------------------------------------------------------------------------------------------------------------------------------------------------------------------------------------------------------------------------------------------|-------|---------|
| CB605313                                                                                                                                                                                                                                                                                                                          | 6.96E-03        | B73=Mo17<F1         | 1.31                     | 12                  | >gb AAF71261.2  beta-glucosidase aggregating factor precursor [Zea mays]                                                                                                                                                                                                                                                                                       | 306   | 6E-22   |
|                                                                                                                                                                                                                                                                                                                                   |                 |                     |                          |                     | >gb ABA96667.1  jacalin homolog [Oryza sativa (japonica cultivar-group)]                                                                                                                                                                                                                                                                                       | 307   | 9E-21   |
|                                                                                                                                                                                                                                                                                                                                   |                 |                     |                          |                     | >gb ABA97248.1  jacalin homolog [Oryza sativa (japonica cultivar-group)]gb ABB51090.1  mannose-specific jacalin-related lectin [Oryza sativa (japonica cultivar-group)]                                                                                                                                                                                        | 306   | 8E-20   |
|                                                                                                                                                                                                                                                                                                                                   |                 |                     |                          |                     | >gb AAA87041.1  putative 32.6 kDa jasmonate-induced protein [Hordeum vulgare]gb AAB72096.1  32 kDa protein [Hordeum vulgare]                                                                                                                                                                                                                                   | 304   | 1E-19   |
|                                                                                                                                                                                                                                                                                                                                   |                 |                     |                          |                     | >gb AAA87042.1  putative 32.7 kDa jasmonate-induced protein [Hordeum vulgare]gb AAB72097.1  32 kDa protein [Hordeum vulgare]                                                                                                                                                                                                                                   | 304   | 3E-19   |
| A1857160                                                                                                                                                                                                                                                                                                                          | 6.99E-03        | Mo17<B73            | 2.81                     | 10                  | >emb CAC19854.1  Oxalyl-CoA decarboxylase [Arabidopsis thaliana]                                                                                                                                                                                                                                                                                               | 572   | 3E-10   |
|                                                                                                                                                                                                                                                                                                                                   |                 |                     |                          |                     | >ref NP_197240.1  pyruvate decarboxylase [Arabidopsis thaliana]emb CAC01733.1  2-hydroxyphytanoyl-CoA lyase-like protein [Arabidopsis thaliana]                                                                                                                                                                                                                |       |         |
|                                                                                                                                                                                                                                                                                                                                   |                 |                     |                          |                     | gb AAN15603.1  2-hydroxyphytanoyl-CoA lyase-like protein [Arabidopsis thaliana] gb AAM20625.1  2-hydroxyphytanoyl-CoA lyase-like protein [Arabidopsis thaliana]                                                                                                                                                                                                | 572   | 3E-10   |
|                                                                                                                                                                                                                                                                                                                                   |                 |                     |                          |                     | >gb AAP69814.1  putative oxalyl-CoA decarboxylase [Vitis vinifera]                                                                                                                                                                                                                                                                                             | 163   | 7E-10   |
|                                                                                                                                                                                                                                                                                                                                   |                 |                     |                          |                     | >ref XP_463271.1  putative oxalyl-CoA decarboxylase [Oryza sativa (japonica cultivar-group)]                                                                                                                                                                                                                                                                   | 577   | 3E-9    |
| >dbj BAD69045.1  unknown protein [Oryza sativa (japonica cultivar-group)]                                                                                                                                                                                                                                                         | 285             | 4E-9                |                          |                     |                                                                                                                                                                                                                                                                                                                                                                |       |         |
| CB334498                                                                                                                                                                                                                                                                                                                          | 7.00E-03        | B73=Mo17<F1         | 1.65                     | 1                   | ns                                                                                                                                                                                                                                                                                                                                                             |       |         |
| A1714933                                                                                                                                                                                                                                                                                                                          | 7.03E-03        | Mo17<B73=F1         | 1.63                     | 10                  | >gb ABA94623.1  Zinc finger, C3HC4 type, putative [Oryza sativa (japonica cultivar-group)]                                                                                                                                                                                                                                                                     | 325   | 1E-37   |
|                                                                                                                                                                                                                                                                                                                                   |                 |                     |                          |                     | >ref NP_179802.2  protein binding / ubiquitin-protein ligase/ zinc ion binding [Arabidopsis thaliana] gb AAO50515.1  unknown protein [Arabidopsis thaliana]                                                                                                                                                                                                    |       |         |
|                                                                                                                                                                                                                                                                                                                                   |                 |                     |                          |                     | gb AAO42065.1  unknown protein [Arabidopsis thaliana]                                                                                                                                                                                                                                                                                                          | 324   | 1E-30   |
|                                                                                                                                                                                                                                                                                                                                   |                 |                     |                          |                     | >gb AAD25813.1  hypothetical protein [Arabidopsis thaliana]                                                                                                                                                                                                                                                                                                    | 252   | 3E-23   |
|                                                                                                                                                                                                                                                                                                                                   |                 |                     |                          |                     | >gb AAM65602.1  unknown [Arabidopsis thaliana]                                                                                                                                                                                                                                                                                                                 | 320   | 1E-12   |
| >gb AAB65494.1  hypothetical protein: 51018-49636 [Arabidopsis thaliana]                                                                                                                                                                                                                                                          | 281             | 1E-12               |                          |                     |                                                                                                                                                                                                                                                                                                                                                                |       |         |
| CD670355                                                                                                                                                                                                                                                                                                                          | 7.10E-03        | Mo17<B73=F1         | 1.22                     | 10                  | >ref XP_482061.1  unknown protein [Oryza sativa (japonica cultivar-group)]dbj BAD05314.1  unknown protein [Oryza sativa (japonica cultivar-group)]                                                                                                                                                                                                             | 196   | 2E-21   |
| DV550932                                                                                                                                                                                                                                                                                                                          | 7.12E-03        | Mo17<B73            | 3.43                     | 10                  | >dbj BAD87907.1  putative glutamate carboxypeptidase [Oryza sativa (japonica cultivar-group)]                                                                                                                                                                                                                                                                  | 728   | 5E-97   |
|                                                                                                                                                                                                                                                                                                                                   |                 |                     |                          |                     | >dbj BAD86951.1  putative glutamate carboxypeptidase [Oryza sativa (japonica cultivar-group)]                                                                                                                                                                                                                                                                  | 661   | 3E-92   |
|                                                                                                                                                                                                                                                                                                                                   |                 |                     |                          |                     | >ref NP_197475.2  dipeptidase [Arabidopsis thaliana]gb AAP37682.1  At5g19740 [Arabidopsis thaliana]                                                                                                                                                                                                                                                            | 681   | 4E-84   |
|                                                                                                                                                                                                                                                                                                                                   |                 |                     |                          |                     | >ref NP_916030.1  peptidase-like protein [Oryza sativa (japonica cultivar-group)]                                                                                                                                                                                                                                                                              | 621   | 2E-69   |
|                                                                                                                                                                                                                                                                                                                                   |                 |                     |                          |                     | >ref XP_469932.1  putative glutamate carboxypeptidase [Oryza sativa (japonica cultivar-group)] gb AAO24914.1  putative glutamate carboxypeptidase [Oryza sativa (japonica cultivar-group)]                                                                                                                                                                     | 772   | 5E-65   |
| DV491634                                                                                                                                                                                                                                                                                                                          | 7.12E-03        | B73<Mo17            | 1.37                     | 4                   | >gb ABA93456.1  transposon protein, putative, CACTA, En/Spm sub-class [Oryza sativa (japonica cultivar-group)]                                                                                                                                                                                                                                                 | 302   | 6E-34   |
|                                                                                                                                                                                                                                                                                                                                   |                 |                     |                          |                     | >gb ABA93448.1  serine carboxypeptidase I, putative [Oryza sativa (japonica cultivar-group)]                                                                                                                                                                                                                                                                   | 168   | 2E-33   |
|                                                                                                                                                                                                                                                                                                                                   |                 |                     |                          |                     | >ref NP_919459.1  putative serine carboxypeptidase [Oryza sativa (japonica cultivar-group)] gb AAL73563.1  Putative serine carboxypeptidase [Oryza sativa (japonica cultivar-group)]                                                                                                                                                                           |       |         |
|                                                                                                                                                                                                                                                                                                                                   |                 |                     |                          |                     | gb AAM08635.1  Putative serine carboxypeptidase [Oryza sativa]                                                                                                                                                                                                                                                                                                 | 432   | 1E-31   |
|                                                                                                                                                                                                                                                                                                                                   |                 |                     |                          |                     | >gb ABB46564.1  Serine carboxypeptidase [Oryza sativa (japonica cultivar-group)]                                                                                                                                                                                                                                                                               | 460   | 1E-31   |
| >ref XP_474646.1  OSJNBb0051N19.2 [Oryza sativa (japonica cultivar-group)]emb CAE01973.2  OSJNBb0051N19.2 [Oryza sativa (japonica cultivar-group)]                                                                                                                                                                                | 467             | 1E-27               |                          |                     |                                                                                                                                                                                                                                                                                                                                                                |       |         |
| A1820131                                                                                                                                                                                                                                                                                                                          | 7.14E-03        | B73<F1=Mo17         | 1.54                     | 2                   | >dbj BAD36121.1  putative 26S proteasome regulatory particle triple-A ATPase subunit4 [Oryza sativa (japonica cultivar-group)]                                                                                                                                                                                                                                 | 401   | 4E-48   |
|                                                                                                                                                                                                                                                                                                                                   |                 |                     |                          |                     | proteasome regulatory particle triple-A ATPase subunit4 [Oryza sativa (japonica cultivar-group)]                                                                                                                                                                                                                                                               | 377   | 4E-48   |
|                                                                                                                                                                                                                                                                                                                                   |                 |                     |                          |                     | >dbj BAB78495.1  26S proteasome regulatory particle triple-A ATPase subunit4b [Oryzasatva (japonica cultivar-group)]                                                                                                                                                                                                                                           |       |         |
|                                                                                                                                                                                                                                                                                                                                   |                 |                     |                          |                     | >ref XP_464508.1  26S proteasome regulatory particle triple-A ATPase subunit4 [Oryzasatva (japonica cultivar-group)] dbj BAD25481.1  26S proteasome regulatory particle triple-A ATPase subunit4 [Oryza sativa (japonica cultivar-group)] dbj BAD15843.1  26S proteasome regulatory particle triple-A ATPase subunit4 [Oryza sativa (japonica cultivar-group)] | 400   | 6E-48   |
|                                                                                                                                                                                                                                                                                                                                   |                 |                     |                          |                     | >gb ABA40428.1  26S proteasome AAA-ATPase subunit RPT4a-like protein [Solanum tuberosum] dbj BAC23035.1  26S proteasome AAA-ATPase subunit RPT4a [Solanum tuberosum]                                                                                                                                                                                           | 398   | 5E-46   |
| >ref NP_199115.1  RPT4A: ATPase [Arabidopsis thaliana]gb AAL7774.1  AT5g43010/MBD2_21 [Arabidopsis thaliana] gb AAK50085.1  AT5g43010/MBD2_21 [Arabidopsis thaliana] dbj BAB09203.1  26S proteasome AAA-ATPase subunit RPT4a [Arabidopsis thaliana] gb AAF22524.1  26S proteasome AAA-ATPase subunit RPT4a [Arabidopsis thaliana] | 399             | 5E-45               |                          |                     |                                                                                                                                                                                                                                                                                                                                                                |       |         |
| >ref XP_467485.1  putative 60S ribosomal protein L31 [Oryza sativa (japonica cultivar-group)] dbj BAD12898.1  putative 60S ribosomal protein L31 [Oryza sativa (japonica cultivar-group)]                                                                                                                                         | 123             | 2E-50               |                          |                     |                                                                                                                                                                                                                                                                                                                                                                |       |         |
| DV492840                                                                                                                                                                                                                                                                                                                          | 7.17E-03        | Mo17<B73=F1         | 1.6                      | 10                  | >gb AAV28627.1  putative 60S ribosomal protein L31 [Zea mays]                                                                                                                                                                                                                                                                                                  | 124   | 2E-48   |
|                                                                                                                                                                                                                                                                                                                                   |                 |                     |                          |                     | >dbj BAD61612.1  putative 60S ribosomal protein L31 [Oryza sativa (japonica cultivar-group)]                                                                                                                                                                                                                                                                   | 124   | 9E-48   |
|                                                                                                                                                                                                                                                                                                                                   |                 |                     |                          |                     | >ref XP_483237.1  putative 60S ribosomal protein L31 [Oryza sativa (japonica cultivar-group)] dbj BAD10170.1  putative 60S ribosomal protein L31 [Oryza sativa (japonica cultivar-group)]                                                                                                                                                                      |       |         |
|                                                                                                                                                                                                                                                                                                                                   |                 |                     |                          |                     | dbj BAD08833.1  putative 60S ribosomal protein L31 [Oryza sativa (japonica cultivar-group)]                                                                                                                                                                                                                                                                    | 122   | 3E-47   |
|                                                                                                                                                                                                                                                                                                                                   |                 |                     |                          |                     | >sp P46290 RL31 N1CGU 60S ribosomal protein L31gb AAA80638.1  ribosomal protein L31                                                                                                                                                                                                                                                                            | 120   | 7E-43   |
| >gb AAQ17040.2  pollen 2-phosphoglycerate dehydrogenase 2 precursor [Cynodon dactylon] gb AAD04187.1  enolase [Zea mays] sp P42895 ENO2_MAIZE                                                                                                                                                                                     |                 |                     |                          |                     |                                                                                                                                                                                                                                                                                                                                                                |       |         |
| CB281932                                                                                                                                                                                                                                                                                                                          | 7.20E-03        | Mo17<B73            | 1.53                     | 10                  | Enolase 2 (2-phosphoglycerate dehydratase 2) (2-phospho-D-glycerate hydro-lyase 2)                                                                                                                                                                                                                                                                             | 446   | 2E-59   |

**Table 4. Microarray analysis results, mode of gene action classification, and BLAST annotation for the 1,367 ESTs identified as differentially expressed among genotypes (15% FDR)**

| GenBank accession no. | Overall P value | Significant pattern | Fold change <sup>†</sup> | Sector <sup>‡</sup> | BLAST annotation*                                                                                                                                                                                                                                                                                                                                                                                         | Score | E value |
|-----------------------|-----------------|---------------------|--------------------------|---------------------|-----------------------------------------------------------------------------------------------------------------------------------------------------------------------------------------------------------------------------------------------------------------------------------------------------------------------------------------------------------------------------------------------------------|-------|---------|
|                       |                 |                     |                          |                     | >gb AAP94211.1  enolase [Oryza sativa (japonica cultivar-group)]                                                                                                                                                                                                                                                                                                                                          | 446   | 3E-57   |
|                       |                 |                     |                          |                     | >gb AAC49173.1  enolasesp Q42971 ENO ORYSA Enolase (2-phosphoglycerate dehydratase) (2-phospho-D-glycerate hydro-lyase) (OSE1)                                                                                                                                                                                                                                                                            | 446   | 9E-57   |
|                       |                 |                     |                          |                     | >emb CAA41115.1  enolase [Lycopersicon esculentum]sp P26300 ENO LYCES Enolase (2-phosphoglycerate dehydratase) (2-phospho-D-glycerate hydro-lyase)                                                                                                                                                                                                                                                        | 444   | 2E-55   |
|                       |                 |                     |                          |                     | >emb CAA39454.1  enolase [Zea mays]sp P26301 ENO1 MAIZE Enolase 1 (2-phosphoglycerate dehydratase 1) (2-phospho-D-glycerate hydro-lyase 1)                                                                                                                                                                                                                                                                | 446   | 1E-54   |
| CB604505              | 7.21E-03        | Mo17<B73=F1         | 1.26                     | 10                  | >ref XP_478036.1  DnaJ protein family-like protein [Oryza sativa (japonica cultivar-group)] dbj BAC06950.1  DnaJ protein family-like protein [Oryza sativa (japonica cultivar-group)]                                                                                                                                                                                                                     | 212   | 2E-66   |
|                       |                 |                     |                          |                     | >ref NP_181738.1  heat shock protein binding / unfolded protein binding [Arabidopsis thaliana] gb AAM97104.1  unknown protein [Arabidopsis thaliana]                                                                                                                                                                                                                                                      | 263   | 5E-17   |
|                       |                 |                     |                          |                     | gb AAB63536.1  unknown protein [Arabidopsis thaliana] gb AAN72139.1  unknown protein [Arabidopsis thaliana]                                                                                                                                                                                                                                                                                               | 254   | 5E-9    |
|                       |                 |                     |                          |                     | >gb AAL87325.1  unknown protein [Arabidopsis thaliana]                                                                                                                                                                                                                                                                                                                                                    | 221   | 3E-87   |
| CB885611              | 7.21E-03        | Mo17<B73            | 1.3                      | 9                   | >sp Q08069 RS8 MAIZE 40S ribosomal protein S8gb AAB06330.1  ribosomal protein S8                                                                                                                                                                                                                                                                                                                          | 221   | 7E-82   |
|                       |                 |                     |                          |                     | >emb CAE05511.1  OSJNBa0038P21.4 [Oryza sativa (japonica cultivar-group)]                                                                                                                                                                                                                                                                                                                                 | 220   | 1E-81   |
|                       |                 |                     |                          |                     | >ref XP_465742.1  putative 40S ribosomal protein S8 [Oryza sativa (japonica cultivar-group)] ref XP_506804.1  PREDICTED P0483C08.42 gene product [Oryza sativa (japonica cultivar-group)] dbj BAD21871.1  putative 40S ribosomal protein S8 [Oryza sativa (japonica cultivar-group)] dbj BAD21876.1  putative 40S ribosomal protein S8 [Oryza sativa (japonica cultivar-group)]                           | 220   | 2E-78   |
|                       |                 |                     |                          |                     | >sp P49199 RS8 ORYSA 40S ribosomal protein S8dbj BAA07207.1  ribosomal protein S8 [Oryza sativa (japonica cultivar-group)]                                                                                                                                                                                                                                                                                | 224   | 8E-78   |
|                       |                 |                     |                          |                     | >gb ABA46755.1  unknown [Solanum tuberosum]                                                                                                                                                                                                                                                                                                                                                               | 283   | 2E-28   |
| CB886094              | 7.22E-03        | B73<F1=Mo17         | 1.27                     | 2                   | >ref XP_467147.1  unknown protein [Oryza sativa (japonica cultivar-group)]dbj BAD25738.1  unknown protein [Oryza sativa (japonica cultivar-group)]                                                                                                                                                                                                                                                        | 293   | 1E-12   |
|                       |                 |                     |                          |                     | dbj BAD25775.1  unknown protein [Oryza sativa (japonica cultivar-group)]                                                                                                                                                                                                                                                                                                                                  | 330   | 1E-12   |
|                       |                 |                     |                          |                     | >gb AAM65994.1  unknown [Arabidopsis thaliana]                                                                                                                                                                                                                                                                                                                                                            | 293   | 1E-12   |
|                       |                 |                     |                          |                     | >dbj BAB02931.1  unnamed protein product [Arabidopsis thaliana]                                                                                                                                                                                                                                                                                                                                           | 293   | 1E-12   |
|                       |                 |                     |                          |                     | >dbj BAC43550.1  unknown protein [Arabidopsis thaliana]                                                                                                                                                                                                                                                                                                                                                   | 293   | 1E-12   |
|                       |                 |                     |                          |                     | >ref NP_566746.1  unknown protein [Arabidopsis thaliana]                                                                                                                                                                                                                                                                                                                                                  | 444   | 6E-48   |
| BM351785              | 7.24E-03        | B73<F1=Mo17         | 1.47                     | 3                   | >gb AAT94032.1  beta-tubulin [Oryza sativa (japonica cultivar-group)]dbj BAC82429.1  beta-tubulin [Oryza sativa (japonica cultivar-group)]                                                                                                                                                                                                                                                                | 430   | 6E-48   |
|                       |                 |                     |                          |                     | sp Q76FS3 TBB6 ORYSA Tubulin beta-6 chain (Beta-6 tubulin)                                                                                                                                                                                                                                                                                                                                                | 447   | 8E-48   |
|                       |                 |                     |                          |                     | >gb AAQ92664.1  beta-tubulin 3 [Gossypium hirsutum]sp Q6VAF8 TBB3 GOSHI Tubulin beta-3 chain (Beta-3 tubulin)                                                                                                                                                                                                                                                                                             | 448   | 8E-48   |
|                       |                 |                     |                          |                     | >emb CAA55022.1  beta tubulin [Oryza sativa (japonica cultivar-group)]                                                                                                                                                                                                                                                                                                                                    | 447   | 8E-48   |
|                       |                 |                     |                          |                     | >emb CAE52516.1  beta tubulin [Setaria viridis]                                                                                                                                                                                                                                                                                                                                                           | 447   | 8E-48   |
|                       |                 |                     |                          |                     | >ref NP_915874.1  tubulin beta chain [Oryza sativa (japonica cultivar-group)]dbj BAB92274.1  beta-tubulin [Oryza sativa (japonica cultivar-group)]                                                                                                                                                                                                                                                        | 447   | 8E-48   |
|                       |                 |                     |                          |                     | dbj BAA06381.1  beta-tubulin [Oryza sativa (japonica cultivar-group)] sp P45960 TBB4 ORYSA Tubulin beta-4 chain (Beta-4 tubulin)                                                                                                                                                                                                                                                                          | 157   | 1E-81   |
| CB334412              | 7.24E-03        | Mo17<B73=F1         | 1.4                      | 11                  | >ref XP_466921.1  putative ubiquitin-conjugating enzyme E2 [Oryza sativa (japonica cultivar-group)] dbj BAD25314.1  putative ubiquitin-conjugating enzyme E2 [Oryza sativa (japonica cultivar-group)]                                                                                                                                                                                                     | 157   | 5E-78   |
|                       |                 |                     |                          |                     | dbj BAD25096.1  putative ubiquitin-conjugating enzyme E2 [Oryza sativa (japonica cultivar-group)]                                                                                                                                                                                                                                                                                                         | 166   | 7E-48   |
|                       |                 |                     |                          |                     | >ref NP_001031939.1  ubiquitin conjugating enzyme/ ubiquitin-like activating enzyme [Arabidopsis thaliana] ref NP_568476.1  ubiquitin conjugating enzyme/ ubiquitin-like activating enzyme [Arabidopsis thaliana] gb AAM60888.1  E2, ubiquitin-conjugating enzyme, putative [Arabidopsis thaliana] gb AA44861.1  ubiquitinating enzyme [Arabidopsis thaliana]                                             | 149   | 6E-47   |
|                       |                 |                     |                          |                     | >gb AAN16047.1  ubiquitin-conjugating enzyme E2 [Pavlova lutheri]                                                                                                                                                                                                                                                                                                                                         | 157   | 2E-44   |
|                       |                 |                     |                          |                     | >ref XP_643940.1  hypothetical protein DDB0167874 [Dictyostelium discoideum]gb AAO51851.1  similar to Arabidopsis thaliana (Mouse-ear cress). E2, ubiquitin-conjugating enzyme, putative [Dictyostelium discoideum] gb EAL70049.1  hypothetical protein DDB0167874 [Dictyostelium discoideum]                                                                                                             | 149   | 6E-47   |
|                       |                 |                     |                          |                     | >emb CAI74825.1  ubiquitin-conjugating enzyme e2, putative [Theileria annulata]ref XP_952557.1  ubiquitin-conjugating enzyme E2 [Theileria annulata strain Ankara]                                                                                                                                                                                                                                        | 157   | 2E-44   |
| CB885492              | 7.24E-03        | B73<F1=Mo17         | 1.41                     | 3                   | >emb CAA33620.1  GAPDH [Zea mays]sp P08735 G3PC MAIZE Glyceraldehyde-3-phosphate dehydrogenase, cytosolic 1                                                                                                                                                                                                                                                                                               | 337   | 1E-94   |
|                       |                 |                     |                          |                     | >emb CAA30151.1  unnamed protein product [Zea mays]                                                                                                                                                                                                                                                                                                                                                       | 337   | 1E-94   |
|                       |                 |                     |                          |                     | >emb CAA51676.1  glyceraldehyde 3-phosphate dehydrogenase (phosphorylating) [Zeamays] sp Q09054 G3PD MAIZE Glyceraldehyde-3-phosphate dehydrogenase, cytosolic 2 gb AAA87880.1  glyceraldehyde-3-phosphate dehydrogenase gb AAA87578.1  cytosolic glyceraldehyde-3-phosphate dehydrogenase GAPC2                                                                                                          | 337   | 2E-92   |
|                       |                 |                     |                          |                     | >emb CAA42901.1  glyceraldehyde 3-phosphate dehydrogenase [Hordeum vulgare]sp P26517 G3PX_HORVU Glyceraldehyde-3-phosphate dehydrogenase, cytosolic                                                                                                                                                                                                                                                       | 337   | 9E-91   |
|                       |                 |                     |                          |                     | >ref XP_479895.1  glyceraldehyde 3-phosphate dehydrogenase, cytosolic [Oryza sativa(japonica cultivar-group)] ref XP_507107.1  PREDICTED OJ1163_G08.15 gene product [Oryza sativa (japonica cultivar-group)] dbj BAD08850.1  glyceraldehyde 3-phosphate dehydrogenase, cytosolic [Oryza sativa (japonica cultivar-group)] sp Q42977 G3PC ORYSA Glyceraldehyde-3-phosphate dehydrogenase, cytosolic (PP38) | 337   | 4E-89   |
|                       |                 |                     |                          |                     | >dbj BAD27922.1  harpin-induced protein-like [Oryza sativa (japonica cultivar-group)] dbj BAD28833.1  harpin-induced protein-like [Oryza sativa (japonica cultivar-group)]                                                                                                                                                                                                                                | 224   | 4E-42   |
| BG842957              | 7.32E-03        | Mo17<B73=F1         | 1.53                     | 11                  | >ref XP_472430.1  OJ991214_12.17 [Oryza sativa (japonica cultivar-group)]emb CAD40930.3  OSJNBa0033G16.4 [Oryza sativa (japonica cultivar-group)]                                                                                                                                                                                                                                                         | 220   | 1E-34   |
|                       |                 |                     |                          |                     | emb CAE01528.2  OJ991214_12.17 [Oryza sativa (japonica cultivar-group)]                                                                                                                                                                                                                                                                                                                                   |       |         |

**Table 4. Microarray analysis results, mode of gene action classification, and BLAST annotation for the 1,367 ESTs identified as differentially expressed among genotypes (15% FDR)**

| GenBank accession no. | Overall P value | Significant pattern | Fold change <sup>†</sup> | Sector <sup>‡</sup> | BLAST annotation*                                                                                                                                                                | Score | E value |
|-----------------------|-----------------|---------------------|--------------------------|---------------------|----------------------------------------------------------------------------------------------------------------------------------------------------------------------------------|-------|---------|
|                       |                 |                     |                          |                     | >gb AAX92937.1  Harpin-induced protein 1 (Hin1), putative [Oryza sativa (japonica cultivar-group)]                                                                               | 210   | 1E-29   |
|                       |                 |                     |                          |                     | >gb ABA96522.1  Harpin-induced protein 1, putative [Oryza sativa (japonica cultivar-group)]                                                                                      | 212   | 1E-28   |
|                       |                 |                     |                          |                     | >ref NP_680206.1  unknown protein [Arabidopsis thaliana]emb CAC34513.1  NDR1/HIN1-like protein [Arabidopsis thaliana]                                                            | 210   | 3E-21   |
| CD527618              | 7.34E-03        | Mo17<B73=F1         | 3.31                     | 10                  | >emb CAD45251.1  barley B recombinant [Hordeum vulgare]                                                                                                                          | 350   | 9E-20   |
|                       |                 |                     |                          |                     | >gb AAS75867.1  barley B recombinant like-protein B [Oryza sativa (japonica cultivar-group)]                                                                                     |       |         |
|                       |                 |                     |                          |                     | gb AAS75865.1  barley B recombinant like-protein A [Oryza sativa (japonica cultivar-group)]                                                                                      |       |         |
|                       |                 |                     |                          |                     | gb ABB46626.1  GAGA binding protein-like family, putative [Oryza sativa (japonica cultivar-group)]                                                                               | 341   | 3E-8    |
|                       |                 |                     |                          |                     | >ref NP_919574.1  unknown protein [Oryza sativa (japonica cultivar-group)]ref NP_919580.1  unknown protein [Oryza sativa (japonica cultivar-group)]                              |       |         |
|                       |                 |                     |                          |                     | gb AAK52543.1  Unknown protein [Oryza sativa (japonica cultivar-group)]                                                                                                          |       |         |
|                       |                 |                     |                          |                     | gb AAK52537.1  Unknown protein [Oryza sativa (japonica cultivar-group)]                                                                                                          |       |         |
|                       |                 |                     |                          |                     | gb AAM44863.1  Unknown protein [Oryza sativa (japonica cultivar-group)]                                                                                                          | 344   | 3E-8    |
|                       |                 |                     |                          |                     | gb AAP51867.1  hypothetical protein LOC_Os10g02510 [Oryza sativa (japonica cultivar-group)]                                                                                      |       |         |
|                       |                 |                     |                          |                     | >ref NP_919582.1  unknown protein [Oryza sativa (japonica cultivar-group)]                                                                                                       |       |         |
|                       |                 |                     |                          |                     | gb AAK52535.1  Unknown protein [Oryza sativa (japonica cultivar-group)]                                                                                                          |       |         |
|                       |                 |                     |                          |                     | gb AAS76677.1  barley B recombinant like protein C [Oryza sativa (japonica cultivar-group)]                                                                                      |       |         |
|                       |                 |                     |                          |                     | gb AAS76676.1  barley B recombinant like protein C [Oryza sativa (japonica cultivar-group)]                                                                                      | 343   | 9E-7    |
|                       |                 |                     |                          |                     | gb AAP51869.1  GAGA binding protein-like family, putative [Oryza sativa (japonica cultivar-group)]                                                                               |       |         |
|                       |                 |                     |                          |                     | >ref XP_481937.1  putative p23 co-chaperone [Oryza sativa (japonica cultivar-group)]ref XP_507202.1  PREDICTED P0488B06.44 gene product [Oryza sativa (japonica cultivar-group)] |       |         |
|                       |                 |                     |                          |                     | dbj BAD03808.1  putative p23 co-chaperone [Oryza sativa (japonica cultivar-group)]                                                                                               |       |         |
| CD568501              | 7.36E-03        | B73<F1=Mo17         | 1.16                     | 2                   | dbj BAD03784.1  putative p23 co-chaperone [Oryza sativa (japonica cultivar-group)]                                                                                               | 213   | 2E-23   |
|                       |                 |                     |                          |                     | >ref NP_192154.2  unknown protein [Arabidopsis thaliana]                                                                                                                         |       |         |
|                       |                 |                     |                          |                     | gb AAN18096.1  At4g02450/T14P8_5 [Arabidopsis thaliana]                                                                                                                          |       |         |
|                       |                 |                     |                          |                     | gb AAM83226.1  AT4g02450/T14P8_5 [Arabidopsis thaliana]                                                                                                                          | 241   | 2E-11   |
|                       |                 |                     |                          |                     | >emb CAC16575.1  p23 co-chaperone [Arabidopsis thaliana]                                                                                                                         | 241   | 2E-11   |
|                       |                 |                     |                          |                     | >emb CAB80738.1  putative protein [Arabidopsis thaliana]                                                                                                                         | 262   | 2E-11   |
|                       |                 |                     |                          |                     | gb AAC19287.1  T14P8.5 [Arabidopsis thaliana]                                                                                                                                    |       |         |
|                       |                 |                     |                          |                     | >gb AAG41763.1  p23 [Brassica napus]                                                                                                                                             | 178   | 3E-8    |
|                       |                 |                     |                          |                     | >ref XP_469888.1  putative serine-threonine protein kinase [Oryza sativa (japonica cultivar-group)]                                                                              |       |         |
|                       |                 |                     |                          |                     | gb AAP50965.1  putative serine-threonine protein kinase [Oryza sativa (japonica cultivar-group)]                                                                                 |       |         |
|                       |                 |                     |                          |                     | dbj BAD18004.1  serine/threonine protein kinase SAPK8 [Oryza sativa (japonica cultivar-group)]                                                                                   | 371   | 1E-42   |
|                       |                 |                     |                          |                     | sp Q7Y0B9 SAPK8_ORYSA Serine/threonine-protein kinase SAPK8 (Osmotic stress/abscisic acid-activated protein kinase 8)                                                            |       |         |
|                       |                 |                     |                          |                     | >ref XP_463160.1  putative protein kinase [Oryza sativa (japonica cultivar-group)]                                                                                               |       |         |
|                       |                 |                     |                          |                     | gb AAR00606.1  putative protein kinase [Oryza sativa (japonica cultivar-group)]                                                                                                  |       |         |
|                       |                 |                     |                          |                     | dbj BAD18006.2  serine/threonine protein kinase SAPK10 [Oryza sativa (japonica cultivar-group)]                                                                                  | 362   | 7E-36   |
|                       |                 |                     |                          |                     | sp Q75H77 SAPKA_ORYSA Serine/threonine-protein kinase SAPK10 (Osmotic stress/abscisic acid-activated protein kinase 10)                                                          |       |         |
|                       |                 |                     |                          |                     | >emb CAB80112.1  protein kinase-like protein [Arabidopsis thaliana]                                                                                                              | 357   | 6E-35   |
|                       |                 |                     |                          |                     | emb CAA19877.1  protein kinase-like protein [Arabidopsis thaliana]                                                                                                               |       |         |
|                       |                 |                     |                          |                     | >ref NP_567945.1  OST1 (OPEN STOMATA 1); kinase/ protein kinase [Arabidopsis thaliana]                                                                                           |       |         |
|                       |                 |                     |                          |                     | emb CAC87047.1  protein kinase [Arabidopsis thaliana]                                                                                                                            |       |         |
|                       |                 |                     |                          |                     | gb AAM10100.1  protein kinase-like protein [Arabidopsis thaliana]                                                                                                                | 362   | 6E-35   |
|                       |                 |                     |                          |                     | gb AAK96815.1  protein kinase - like protein [Arabidopsis thaliana]                                                                                                              |       |         |
|                       |                 |                     |                          |                     | >dbj BAD18005.1  serine/threonine protein kinase SAPK9 [Oryza sativa (japonica cultivar-group)]                                                                                  |       |         |
|                       |                 |                     |                          |                     | sp Q75V57 SAPK9_ORYSA Serine/threonine-protein kinase SAPK9 (Osmotic stress/abscisic acid-activated protein kinase 9)                                                            | 361   | 6E-35   |
|                       |                 |                     |                          |                     | gb ABA99733.1  protein kinase-like protein [Oryza sativa (japonica cultivar-group)]                                                                                              |       |         |
| CB815998              | 7.39E-03        | B73<F1=Mo17         | 1.24                     | 2                   | >gb AAT68209.1  putative histone H2B [Cynodon dactylon]                                                                                                                          | 98    | 1E-34   |
|                       |                 |                     |                          |                     | >ref XP_475912.1  putative histone H2B [Oryza sativa (japonica cultivar-group)]                                                                                                  |       |         |
|                       |                 |                     |                          |                     | gb AAU44113.1  putative histone H2B [Oryza sativa (japonica cultivar-group)]                                                                                                     |       |         |
|                       |                 |                     |                          |                     | gb AAT69583.1  putative histone H2B [Oryza sativa (japonica cultivar-group)]                                                                                                     | 152   | 1E-34   |
|                       |                 |                     |                          |                     | >ref NP_915412.1  putative histone H2B [Oryza sativa (japonica cultivar-group)]                                                                                                  |       |         |
|                       |                 |                     |                          |                     | dbj BAB93209.1  putative histone H2B [Oryza sativa (japonica cultivar-group)]                                                                                                    |       |         |
|                       |                 |                     |                          |                     | dbj BAB67889.1  putative histone H2B [Oryza sativa (japonica cultivar-group)]                                                                                                    | 139   | 1E-34   |
|                       |                 |                     |                          |                     | >ref NP_909298.1  putative histone H2B [Oryza sativa (japonica cultivar-group)]                                                                                                  |       |         |
|                       |                 |                     |                          |                     | dbj BAB44055.1  putative histone H2B [Oryza sativa (japonica cultivar-group)]                                                                                                    | 155   | 1E-34   |
|                       |                 |                     |                          |                     | >ref NP_909263.1  putative histone H2B [Oryza sativa (japonica cultivar-group)]                                                                                                  |       |         |
|                       |                 |                     |                          |                     | dbj BAB44008.1  putative histone H2B [Oryza sativa (japonica cultivar-group)]                                                                                                    | 153   | 1E-34   |
|                       |                 |                     |                          |                     | >gb AAV59379.1  putative early-responsive to dehydration stress protein (ERD4) [Oryza sativa (japonica cultivar-group)]                                                          |       |         |
|                       |                 |                     |                          |                     | ref XP_476028.1  putative early-responsive to dehydration stress protein (ERD4) [Oryza sativa (japonica cultivar-group)]                                                         | 766   | 3E-9    |
|                       |                 |                     |                          |                     | >dbj BAD87679.1  putative ERD4 protein [Oryza sativa (japonica cultivar-group)]                                                                                                  | 768   | 7E-9    |
|                       |                 |                     |                          |                     | >ref NP_918121.1  OJ1029 F04.25 [Oryza sativa (japonica cultivar-group)]                                                                                                         | 646   | 7E-9    |
|                       |                 |                     |                          |                     | >gb AAF70851.1  F24O1.4 [Arabidopsis thaliana]                                                                                                                                   | 778   | 9E-9    |
|                       |                 |                     |                          |                     | >ref NP_176422.1  unknown protein [Arabidopsis thaliana]                                                                                                                         | 769   | 9E-9    |
| CD670441              | 7.48E-03        | Mo17<B73=F1         | 1.33                     | 11                  | >ref XP_474251.1  OSJNBa0087O24.9 [Oryza sativa (japonica cultivar-group)]                                                                                                       | 309   | 3E-12   |
|                       |                 |                     |                          |                     | emb CAE03586.1  OSJNBa0087O24.9 [Oryza sativa (japonica cultivar-group)]                                                                                                         |       |         |
|                       |                 |                     |                          |                     | >ref XP_464444.1  KH domain-containing protein-like [Oryza sativa (japonica cultivar-group)]                                                                                     |       |         |
|                       |                 |                     |                          |                     | dbj BAD15406.1  KH domain-containing protein-like [Oryza sativa (japonica cultivar-group)]                                                                                       | 300   | 4E-10   |
|                       |                 |                     |                          |                     | >dbj BAD35424.1  KH domain-containing protein / zinc finger protein-like [Oryza sativa (japonica cultivar-group)]                                                                | 295   | 1E-8    |
|                       |                 |                     |                          |                     | >ref NP_566412.1  nucleic acid binding / transcription factor [Arabidopsis thaliana]                                                                                             |       |         |
|                       |                 |                     |                          |                     | gb AAM62964.1  unknown [Arabidopsis thaliana]                                                                                                                                    | 248   | 5E-6    |
|                       |                 |                     |                          |                     | gb AAG51040.1  unknown protein; 15726-17646 [Arabidopsis thaliana]                                                                                                               | 248   | 5E-6    |
|                       |                 |                     |                          |                     | >dbj BAB01961.1  unnamed protein product [Arabidopsis thaliana]                                                                                                                  | 231   | 5E-6    |

**Table 4. Microarray analysis results, mode of gene action classification, and BLAST annotation for the 1,367 ESTs identified as differentially expressed among genotypes (15% FDR)**

| GenBank accession no. | Overall P value | Significant pattern | Fold change <sup>‡</sup> | Sector <sup>‡</sup> | BLAST annotation*                                                                                                                                                                                                                                                                                                                                           | Score | E value |
|-----------------------|-----------------|---------------------|--------------------------|---------------------|-------------------------------------------------------------------------------------------------------------------------------------------------------------------------------------------------------------------------------------------------------------------------------------------------------------------------------------------------------------|-------|---------|
| CB816140              | 7.50E-03        | Mo17<B73            | 1.4                      | 9                   | >ref NP_922780.1  putative chloroplast chaperonin [Oryza sativa (japonica cultivar-group)] gb AAL79700.1  putative chloroplast chaperonin [Oryza sativa]                                                                                                                                                                                                    | 140   | 1E-50   |
|                       |                 |                     |                          |                     | gb AAP55067.1  chloroplast chaperonin, putative [Oryza sativa (japonica cultivar-group)]                                                                                                                                                                                                                                                                    |       |         |
|                       |                 |                     |                          |                     | >ref NP_191580.1  ATP binding [Arabidopsis thaliana]emb CAB75936.1  putative protein [Arabidopsis thaliana] gb AAM65007.1  unknown [Arabidopsis thaliana]                                                                                                                                                                                                   | 138   | 3E-36   |
|                       |                 |                     |                          |                     | gb AAO64777.1  At3g60210 [Arabidopsis thaliana]                                                                                                                                                                                                                                                                                                             |       |         |
|                       |                 |                     |                          |                     | >ref NP_566022.1  CHL-CPN10 [Arabidopsis thaliana]gb AAC27467.1  expressed protein [Arabidopsis thaliana] dbj BAB55457.1  chloroplast chaperonin 10 [Arabidopsis thaliana]                                                                                                                                                                                  | 139   | 2E-33   |
| CB885579              | 7.55E-03        | B73<F1=Mo17         | 1.25                     | 2                   | >gb AAL66945.1  unknown protein [Arabidopsis thaliana]gb AAK62415.1  Unknown protein [Arabidopsis thaliana]                                                                                                                                                                                                                                                 | 139   | 2E-33   |
|                       |                 |                     |                          |                     | >ref YP_477843.1  chaperonin, 10 kDa [Cyanobacteria bacterium Yellowstone B-Prime]                                                                                                                                                                                                                                                                          | 103   | 2E-8    |
|                       |                 |                     |                          |                     | >ref XP_473529.1  OSJNBa0005N02.3 [Oryza sativa (japonica cultivar-group)]emb CAE02070.2  OSJNBa0005N02.3 [Oryza sativa (japonica cultivar-group)]                                                                                                                                                                                                          | 1101  | 6E-56   |
|                       |                 |                     |                          |                     | >dbj BAD27856.1  putative argonaute protein [Oryza sativa (japonica cultivar-group)]                                                                                                                                                                                                                                                                        | 1082  | 5E-55   |
|                       |                 |                     |                          |                     | >ref NP_175274.1  AGO1 (ARGONAUTE 1) [Arabidopsis thaliana]gb AAN41341.1  putative leaf development protein Argonaute [Arabidopsis thaliana]                                                                                                                                                                                                                |       |         |
| CD001596              | 7.62E-03        | Mo17<B73=F1         | 1.24                     | 10                  | gb AAD49755.1  Identical to Argonaute protein from Arabidopsis thaliana gb U91995. EST gb AA720232 comes from this gene gb AAC18440.1  Argonaute protein [Arabidopsis thaliana] sp O04379 AGO1 ARATH Argonaute protein                                                                                                                                      | 1048  | 7E-54   |
|                       |                 |                     |                          |                     | >ref NP_849784.1  AGO1 (ARGONAUTE 1) [Arabidopsis thaliana]                                                                                                                                                                                                                                                                                                 | 1050  | 7E-54   |
|                       |                 |                     |                          |                     | >gb AAF79718.1  TIN15.2 [Arabidopsis thaliana]                                                                                                                                                                                                                                                                                                              | 1123  | 7E-54   |
|                       |                 |                     |                          |                     | >dbj BAA35120.1  NADH dependent Glutamate Synthase [Oryza sativa]                                                                                                                                                                                                                                                                                           | 2166  | 6E-69   |
|                       |                 |                     |                          |                     | >ref NP_916947.1  NADH-dependent glutamate synthase [Oryza sativa (japonica cultivar-group)]                                                                                                                                                                                                                                                                | 2157  | 2E-68   |
| DV490270              | 7.62E-03        | Mo17<B73=F1         | 4.67                     | 10                  | >ref XP_475886.1  putative glutamate synthase [Oryza sativa (japonica cultivar-group)] gb AAT58702.1  putative glutamate synthase [Oryza sativa (japonica cultivar-group)]                                                                                                                                                                                  | 609   | 2E-60   |
|                       |                 |                     |                          |                     | >sp Q03460 GLSN MEDSA Glutamate synthase [NADH], chloroplast precursor (NADH-GOGAT)gb AAB46617.1  NADH-glutamate synthase [Medicago sativa]                                                                                                                                                                                                                 | 2194  | 9E-54   |
|                       |                 |                     |                          |                     | >gb AAY99625.1  NADH-dependent glutamate synthase protein [Puccinellia tenuiflora]                                                                                                                                                                                                                                                                          | 165   | 1E-53   |
|                       |                 |                     |                          |                     | ns                                                                                                                                                                                                                                                                                                                                                          |       |         |
|                       |                 |                     |                          |                     | >gb AAD39834.1  eukaryotic translation initiation factor 3 large subunit [Zea mays]sp Q9XHR2 IF3A_MAIZE Eukaryotic translation initiation factor 3 subunit 10 (eIF-3 theta) (Eukaryotic translation initiation factor 3 large subunit) (eIF3a)                                                                                                              | 962   | 5E-28   |
| BM073003              | 7.64E-03        | Mo17<B73=F1         | 1.37                     | 11                  | >ref XP_549952.1  putative translation initiation factor [Oryza sativa (japonica cultivar-group)] emb CAD24839.1  translation initiation factor 3 [Oryza sativa (japonica cultivar-group)] dbj BAD52450.1  putative translation initiation factor [Oryza sativa (japonica cultivar-group)]                                                                  | 986   | 1E-9    |
|                       |                 |                     |                          |                     | >ref NP_909031.1  putative eukaryotic translation initiation factor 3 large subunit [Oryza sativa (japonica cultivar-group)]                                                                                                                                                                                                                                | 984   | 1E-9    |
|                       |                 |                     |                          |                     | >dbj BAD35672.1  putative cinnamoyl-CoA reductase [Oryza sativa (japonica cultivar-group)]                                                                                                                                                                                                                                                                  | 321   | 4E-55   |
|                       |                 |                     |                          |                     | >dbj BAD35675.1  putative cinnamoyl-CoA reductase [Oryza sativa (japonica cultivar-group)]                                                                                                                                                                                                                                                                  | 321   | 6E-39   |
|                       |                 |                     |                          |                     | >ref NP_180917.1  cinnamoyl-CoA reductase [Arabidopsis thaliana]gb AAN15374.1  putative cinnamoyl-CoA reductase [Arabidopsis thaliana] gb AAM53272.1  putative cinnamoyl-CoA reductase [Arabidopsis thaliana] gb AAB80681.1  putative cinnamoyl-CoA reductase [Arabidopsis thaliana] gb AAM61149.1  putative cinnamoyl-CoA reductase [Arabidopsis thaliana] | 321   | 3E-36   |
| CD001273              | 7.72E-03        | Mo17<F1             | 1.3                      | 11                  | >ref NP_180918.1  cinnamoyl-CoA reductase [Arabidopsis thaliana]gb AAP42731.1  At2g33600 [Arabidopsis thaliana] gb AAM13142.1  putative cinnamoyl-CoA reductase [Arabidopsis thaliana] gb AAB80683.1  putative cinnamoyl-CoA reductase [Arabidopsis thaliana]                                                                                               | 321   | 3E-35   |
|                       |                 |                     |                          |                     | >ref NP_177773.1  cinnamoyl-CoA reductase [Arabidopsis thaliana]gb AAG51951.1  putative cinnamoyl-CoA reductase; 27707-26257 [Arabidopsis thaliana]                                                                                                                                                                                                         | 317   | 3E-29   |
|                       |                 |                     |                          |                     | >ref XP_469638.1  unknown protein [Oryza sativa (japonica cultivar-group)]gb AAR07080.1  unknown protein [Oryza sativa (japonica cultivar-group)]                                                                                                                                                                                                           |       |         |
|                       |                 |                     |                          |                     | dbj BAC78576.1  hypothetical protein [Oryza sativa (japonica cultivar-group)] gb AAP03422.1  unknown protein [Oryza sativa (japonica cultivar-group)]                                                                                                                                                                                                       | 205   | 3E-80   |
|                       |                 |                     |                          |                     | >gb AAU93534.1  unknown protein [Zea mays]                                                                                                                                                                                                                                                                                                                  | 286   | 6E-79   |
| DV550057              | 7.74E-03        | B73<Mo17            | 1.37                     | 3                   | >gb AAT08729.1  CBS1 [Hyacinthus orientalis]                                                                                                                                                                                                                                                                                                                | 203   | 4E-71   |
|                       |                 |                     |                          |                     | >ref NP_196647.1  unknown protein [Arabidopsis thaliana]emb CAB96841.1  putative protein [Arabidopsis thaliana] gb AAK32857.1  AT5g10860/T30N20_130 [Arabidopsis thaliana] gb AAL47413.1  AT5g10860/T30N20_130 [Arabidopsis thaliana] sp Q9LEV3 UMP3 ARATH Protein At5g10860, mitochondrial precursor                                                       | 206   | 2E-66   |
|                       |                 |                     |                          |                     | >gb AAL67493.1  senescence-associated putative protein [Narcissus pseudonarcissus]                                                                                                                                                                                                                                                                          | 109   | 1E-37   |
|                       |                 |                     |                          |                     | >ref XP_506162.1  PREDICTED OJ1027_G06.13 gene product [Oryza sativa (japonica cultivar-group)] ref XP_476646.1  putative ERD4 protein [Oryza sativa (japonica cultivar-group)] dbj BAC82906.1  putative ERD4 protein [Oryza sativa (japonica cultivar-group)]                                                                                              | 731   | 5E-88   |
|                       |                 |                     |                          |                     | >gb AAL47004.1  unknown [Davidia involucreta]                                                                                                                                                                                                                                                                                                               | 226   | 1E-65   |
| CB815770              | 7.75E-03        | B73=F1<Mo17         | 1.32                     | 4                   | >dbj BAD94517.1  ERD4 protein [Arabidopsis thaliana]                                                                                                                                                                                                                                                                                                        | 203   | 1E-56   |
|                       |                 |                     |                          |                     | >ref NP_564354.1  unknown protein [Arabidopsis thaliana]gb AAL34230.1  unknown protein [Arabidopsis thaliana] gb AAK59597.1  unknown protein [Arabidopsis thaliana] gb AAG51102.1  unknown protein [Arabidopsis thaliana]                                                                                                                                   | 724   | 1E-56   |
|                       |                 |                     |                          |                     | >dbj BAB63915.1  ERD4 protein [Arabidopsis thaliana]                                                                                                                                                                                                                                                                                                        | 640   | 3E-56   |
|                       |                 |                     |                          |                     | >emb CAA86728.1  calcium-binding protein [Zea mays]emb CAA61939.1  Calreticulin precursor [Zea mays] prf 2205314A calreticulin                                                                                                                                                                                                                              | 421   | 2E-60   |
|                       |                 |                     |                          |                     | >ref XP_477252.1  putative Calreticulin precursor [Oryza sativa (japonica cultivar-group)] dbj BAD31962.1  putative Calreticulin precursor [Oryza sativa (japonica cultivar-group)] dbj BAC82933.1  putative Calreticulin precursor [Oryza sativa (japonica cultivar-group)]                                                                                | 429   | 4E-58   |

**Table 4. Microarray analysis results, mode of gene action classification, and BLAST annotation for the 1,367 ESTs identified as differentially expressed among genotypes (15% FDR)**

| GenBank accession no. | Overall P value | Significant pattern | Fold change <sup>‡</sup> | Sector <sup>‡</sup> | BLAST annotation*                                                                                                                                                                                                                                                                                                                                                                                                                                                                         | Score | E value |
|-----------------------|-----------------|---------------------|--------------------------|---------------------|-------------------------------------------------------------------------------------------------------------------------------------------------------------------------------------------------------------------------------------------------------------------------------------------------------------------------------------------------------------------------------------------------------------------------------------------------------------------------------------------|-------|---------|
|                       |                 |                     |                          |                     | >ref XP_477251.1  putative Calreticulin precursor [Oryza sativa (japonica cultivar-group)] ref XP_507358.1  PREDICTED OJ1058_C08.28-2 gene product [Oryza sativa (japonica cultivar-group)] ref XP_506239.1  PREDICTED OJ1058_C08.28-2 gene product [Oryza sativa (japonica cultivar-group)] dbj BAD31961.1  putative Calreticulin precursor [Oryza sativa (japonica cultivar-group)] dbj BAC82932.1  putative Calreticulin precursor [Oryza sativa (japonica cultivar-group)]            | 424   | 4E-58   |
|                       |                 |                     |                          |                     | sp Q9SLY8 CRTC ORYSA Calreticulin precursor                                                                                                                                                                                                                                                                                                                                                                                                                                               | 424   | 4E-58   |
|                       |                 |                     |                          |                     | >dbj BAA88900.1  calcium-binding protein [Oryza sativa]                                                                                                                                                                                                                                                                                                                                                                                                                                   | 415   | 1E-57   |
|                       |                 |                     |                          |                     | >gb AAW02798.1  calreticulin-like protein [Triticum aestivum]                                                                                                                                                                                                                                                                                                                                                                                                                             | 103   | 1E-24   |
| BM073517              | 7.77E-03        | Mo17<B73=F1         | 1.28                     | 10                  | >gb AAT08725.1  histone H4 [Hyacinthus orientalis]                                                                                                                                                                                                                                                                                                                                                                                                                                        | 103   | 1E-24   |
|                       |                 |                     |                          |                     | >emb CAB01913.1  Histone H4 homologue [Sesbania rostrata]                                                                                                                                                                                                                                                                                                                                                                                                                                 | 103   | 1E-24   |
|                       |                 |                     |                          |                     | >emb CAA64985.1  histone H4 [Allium cepa]                                                                                                                                                                                                                                                                                                                                                                                                                                                 | 58    | 1E-24   |
|                       |                 |                     |                          |                     | >ref NP_563793.1  DNA binding [Arabidopsis thaliana] ref NP_850660.1  DNA binding [Arabidopsis thaliana] ref NP_180441.1  HIS4 [Arabidopsis thaliana]                                                                                                                                                                                                                                                                                                                                     |       |         |
|                       |                 |                     |                          |                     | ref NP_568911.1  DNA binding [Arabidopsis thaliana] ref NP_568918.1  DNA binding [Arabidopsis thaliana] ref NP_190941.1  DNA binding [Arabidopsis thaliana]                                                                                                                                                                                                                                                                                                                               |       |         |
|                       |                 |                     |                          |                     | ref NP_563797.1  DNA binding [Arabidopsis thaliana] ref NP_850939.1  DNA binding [Arabidopsis thaliana] ref NP_190179.1  DNA binding [Arabidopsis thaliana] ref XP_475394.1  histone H4 [Oryza sativa (japonica cultivar-group)] ref XP_475383.1  putative histone H4 [Oryza sativa (japonica cultivar-group)]                                                                                                                                                                            |       |         |
|                       |                 |                     |                          |                     | ref NP_912452.1  Unknown protein [Oryza sativa (japonica cultivar-group)] ref XP_467181.1  histone H4 [Oryza sativa (japonica cultivar-group)] ref NP_922551.1  histone H4 [Oryza sativa (japonica cultivar-group)] ref NP_915374.1  putative histone H4 [Oryza sativa (japonica cultivar-group)] ref NP_910647.1  histone H4 [Oryza sativa (japonica cultivar-group)] ref XP_473659.1  OSJNBa0088A01.17 [Oryza sativa (japonica cultivar-group)] gb AAU90170.1  histone H4 [Oryza sativa | 103   | 1E-24   |
|                       |                 |                     |                          |                     | >sp P62786 H42 WHEAT Histone H4 variant TH091 gb AAA34292.1  histone H4                                                                                                                                                                                                                                                                                                                                                                                                                   | 103   | 1E-24   |
|                       |                 |                     |                          |                     | >emb CAD29296.1  plasma membrane H+ ATPase [Oryza sativa (japonica cultivar-group)] gb ABA99607.1  plasma-membrane proton-efflux P-type ATPase [Oryza sativa (japonica cultivar-group)]                                                                                                                                                                                                                                                                                                   | 956   | 2E-75   |
| CB329458              | 7.79E-03        | Mo17<B73            | 1.45                     | 10                  | >ref XP_476966.1  plasma membrane H+ ATPase [Oryza sativa (japonica cultivar-group)] emb CAD29295.1  plasma membrane H+ ATPase [Oryza sativa (japonica cultivar-group)] dbj BAC83861.1  plasma membrane H+ ATPase [Oryza sativa (japonica cultivar-group)]                                                                                                                                                                                                                                | 957   | 3E-75   |
|                       |                 |                     |                          |                     | >dbj BAA06629.1  plasma membrane H+ ATPase [Oryza sativa (japonica cultivar-group)]                                                                                                                                                                                                                                                                                                                                                                                                       | 957   | 6E-75   |
|                       |                 |                     |                          |                     | >gb AAT81733.1  H-ATPase [Oryza sativa (japonica cultivar-group)] emb CAD29294.1  plasma membrane H+ ATPase [Oryza sativa (japonica cultivar-group)]                                                                                                                                                                                                                                                                                                                                      | 956   | 9E-74   |
|                       |                 |                     |                          |                     | >gb AAA34096.1  plasma membrane H+ ATPase                                                                                                                                                                                                                                                                                                                                                                                                                                                 | 440   | 1E-71   |
|                       |                 |                     |                          |                     | >dbj BAD36121.1  putative 26S proteasome regulatory particle triple-A ATPasesubunit4 [Oryza sativa (japonica cultivar-group)] dbj BAD35613.1  putative 26S proteasome regulatory particle triple-A ATPase subunit4 [Oryza sativa (japonica cultivar-group)]                                                                                                                                                                                                                               | 401   | 6E-43   |
| CD670361              | 7.80E-03        | B73=F1<Mo17         | 1.26                     | 4                   | >dbj BAB78495.1  26S proteasome regulatory particle triple-A ATPase subunit4b [Oryzasativa (japonica cultivar-group)]                                                                                                                                                                                                                                                                                                                                                                     | 377   | 6E-43   |
|                       |                 |                     |                          |                     | >ref XP_464508.1  26S proteasome regulatory particle triple-A ATPase subunit4 [Oryzasativa (japonica cultivar-group)] dbj BAD25481.1  26S proteasome regulatory particle triple-A ATPase subunit4 [Oryza sativa (japonica cultivar-group)] dbj BAD15843.1  26S proteasome regulatory particle triple-A ATPase subunit4 [Oryza sativa (japonica cultivar-group)] dbj BAB17625.1  26S proteasome regulatory particle triple-A ATPase subunit4 [Oryza sativa (japonica cultivar-group)]      | 400   | 1E-42   |
|                       |                 |                     |                          |                     | >gb ABA40428.1  26S proteasome AAA-ATPase subunit RPT4a-like protein [Solanum tuberosum] dbj BAC23035.1  26S proteasome AAA-ATPase subunit RPT4a [Solanum tuberosum]                                                                                                                                                                                                                                                                                                                      | 398   | 7E-41   |
|                       |                 |                     |                          |                     | >ref NP_199115.1  RPT4A; ATPase [Arabidopsis thaliana] gb AAL77741.1  AT5g43010/MBD2_21 [Arabidopsis thaliana] gb AAK50085.1  AT5g43010/MBD2_21 [Arabidopsis thaliana] dbj BAB09203.1  26S proteasome AAA-ATPase subunit RPT4a [Arabidopsis thaliana] gb AAF22524.1  26S proteasome AAA-ATPase subunit RPT4a [Arabidopsis thaliana]                                                                                                                                                       | 399   | 8E-40   |
| BM080445              | 7.81E-03        | Mo17<B73=F1         | 1.38                     | 10                  | ns                                                                                                                                                                                                                                                                                                                                                                                                                                                                                        |       |         |
| CD059002              | 7.83E-03        | Mo17<B73=F1         | 1.29                     | 11                  | >gb AAF71261.2  beta-glucosidase aggregating factor precursor [Zea mays]                                                                                                                                                                                                                                                                                                                                                                                                                  | 306   | 8E-22   |
|                       |                 |                     |                          |                     | >gb ABA96667.1  jacalin homolog [Oryza sativa (japonica cultivar-group)]                                                                                                                                                                                                                                                                                                                                                                                                                  | 307   | 1E-20   |
|                       |                 |                     |                          |                     | >gb ABA97248.1  jacalin homolog [Oryza sativa (japonica cultivar-group)] gb ABB51090.1  mannose-specific jacalin-related lectin [Oryza sativa (japonica cultivar-group)]                                                                                                                                                                                                                                                                                                                  | 306   | 3E-20   |
|                       |                 |                     |                          |                     | >gb AAA87041.1  putative 32.6 kDa jasmonate-induced protein [Hordeum vulgare] gb AAB72096.1  32 kDa protein [Hordeum vulgare]                                                                                                                                                                                                                                                                                                                                                             | 304   | 2E-19   |
|                       |                 |                     |                          |                     | >gb ABA94721.1  Jacalin-like lectin domain, putative [Oryza sativa (japonica cultivar-group)]                                                                                                                                                                                                                                                                                                                                                                                             | 734   | 2E-19   |
| CB240027              | 7.90E-03        | B73<Mo17            | 1.46                     | 4                   | >ref NP_909910.1  unknown protein [Oryza sativa] gb AAK72889.1  unknown protein [Oryza sativa]                                                                                                                                                                                                                                                                                                                                                                                            | 350   | 2E-46   |
|                       |                 |                     |                          |                     | >ref NP_188868.2  unknown protein [Arabidopsis thaliana] gb AAK43988.1  unknown protein [Arabidopsis thaliana] dbj BAD94071.1  hypothetical protein [Arabidopsis thaliana] dbj BAD44059.1  unknown protein [Arabidopsis thaliana] dbj BAD43970.1  unknown protein [Arabidopsis thaliana] dbj BAD43746.1  unknown protein [Arabidopsis thaliana] dbj BAD43192.1  unknown protein [Arabidopsis thaliana]                                                                                    | 354   | 5E-37   |
|                       |                 |                     |                          |                     | >dbj BAB17274.1  unnamed protein product [Arabidopsis thaliana]                                                                                                                                                                                                                                                                                                                                                                                                                           | 333   | 1E-31   |
|                       |                 |                     |                          |                     | >ref XP_472721.1  OSJNBa0006M15.17 [Oryza sativa (japonica cultivar-group)] emb CAE02574.2  OSJNBa0006M15.17 [Oryza sativa (japonica cultivar-group)]                                                                                                                                                                                                                                                                                                                                     | 386   | 8E-16   |
|                       |                 |                     |                          |                     | >ref XP_475457.1  unknown protein [Oryza sativa (japonica cultivar-group)] gb AAT69636.1  unknown protein [Oryza sativa (japonica cultivar-group)]                                                                                                                                                                                                                                                                                                                                        | 384   | 8E-15   |
| BM080525              | 7.94E-03        | F1=Mo17<B73         | 5.47                     | 9                   | ns                                                                                                                                                                                                                                                                                                                                                                                                                                                                                        |       |         |
| CB816344              | 7.95E-03        | Mo17<B73=F1         | 1.3                      | 11                  | >gb ABA97248.1  jacalin homolog [Oryza sativa (japonica cultivar-group)] gb ABB51090.1  mannose-specific jacalin-related lectin [Oryza sativa (japonica cultivar-group)]                                                                                                                                                                                                                                                                                                                  | 306   | 4E-29   |
|                       |                 |                     |                          |                     | >gb ABA96667.1  jacalin homolog [Oryza sativa (japonica cultivar-group)]                                                                                                                                                                                                                                                                                                                                                                                                                  | 307   | 3E-27   |

**Table 4. Microarray analysis results, mode of gene action classification, and BLAST annotation for the 1,367 ESTs identified as differentially expressed among genotypes (15% FDR)**

| GenBank accession no. | Overall P value | Significant pattern | Fold change <sup>‡</sup> | Sector <sup>‡</sup> | BLAST annotation*                                                                                                                                                                                                                                                                                                                                                                                                                                                                                                                                                 | Score | E value |
|-----------------------|-----------------|---------------------|--------------------------|---------------------|-------------------------------------------------------------------------------------------------------------------------------------------------------------------------------------------------------------------------------------------------------------------------------------------------------------------------------------------------------------------------------------------------------------------------------------------------------------------------------------------------------------------------------------------------------------------|-------|---------|
|                       |                 |                     |                          |                     | >gb/AAR20919.1  jasmonate-induced protein [Triticum aestivum]                                                                                                                                                                                                                                                                                                                                                                                                                                                                                                     | 304   | 4E-27   |
|                       |                 |                     |                          |                     | >gb/AAA87041.1  putative 32.6 kDa jasmonate-induced protein [Hordeum vulgare]gb/AAB72096.1  32 kDa protein [Hordeum vulgare]                                                                                                                                                                                                                                                                                                                                                                                                                                      | 304   | 5E-27   |
|                       |                 |                     |                          |                     | >gb/AAF71261.2  beta-glucosidase aggregating factor precursor [Zea mays]                                                                                                                                                                                                                                                                                                                                                                                                                                                                                          | 306   | 6E-27   |
| CD001188              | 8.00E-03        | Mo17<B73=F1         | 1.44                     | 10                  | >gb/AAV41384.1  WRKY DNA-binding protein [Oryza sativa (indica cultivar-group)]                                                                                                                                                                                                                                                                                                                                                                                                                                                                                   | 263   | 2E-6    |
|                       |                 |                     |                          |                     | >gb/ABA91247.1  wrky transcription factor 62, putative [Oryza sativa (japonica cultivar-group)]                                                                                                                                                                                                                                                                                                                                                                                                                                                                   | 280   | 2E-6    |
|                       |                 |                     |                          |                     | >gb/ABA95640.1  hypothetical protein LOC_Os12g02440 [Oryza sativa (japonica cultivar-group)]                                                                                                                                                                                                                                                                                                                                                                                                                                                                      | 217   | 2E-6    |
| BM074340              | 8.02E-03        | Mo17<B73=F1         | 1.52                     | 10                  | >emb CAA73691.1  Glyoxalase I [Brassica juncea]sp O04885 LGUL_BRAJU Lactoylglutathione lyase (Methylglyoxalase) (Aldoketomutase) (Glyoxalase I) (Glx I) (Ketone-aldehyde mutase) (S-D-lactoylglutathione methylglyoxal lyase)                                                                                                                                                                                                                                                                                                                                     | 185   | 2E-20   |
|                       |                 |                     |                          |                     | >ref NP_849609.1  calmodulin binding / lactoylglutathione lyase [Arabidopsis thaliana] ref NP_172291.1  calmodulin binding / lactoylglutathione lyase [Arabidopsis thaliana] ref NP_001030995.1  calmodulin binding / lactoylglutathione lyase [Arabidopsis thaliana] gb AAT41850.1  At1g08110 [Arabidopsis thaliana] gb AAN72031.1  glyoxalase I, putative [Arabidopsis thaliana] sp Q8H0V3 LGUL_ARATH Lactoylglutathione lyase (Methylglyoxalase) (Aldoketomutase) (Glyoxalase I) (Glx I) (Ketone-aldehyde mutase) (S-D-lactoylglutathione methylglyoxal lyase) | 185   | 6E-20   |
|                       |                 |                     |                          |                     | >ref NP_001030996.1  calmodulin binding / lactoylglutathione lyase [Arabidopsis thaliana]                                                                                                                                                                                                                                                                                                                                                                                                                                                                         | 235   | 6E-20   |
|                       |                 |                     |                          |                     | >gb AAF79827.1  T6D22.20 [Arabidopsis thaliana]                                                                                                                                                                                                                                                                                                                                                                                                                                                                                                                   | 196   | 6E-20   |
|                       |                 |                     |                          |                     | >emb CAA09177.1  glyoxalase I [Glycine max]                                                                                                                                                                                                                                                                                                                                                                                                                                                                                                                       | 185   | 8E-20   |
| DV549456              | 8.03E-03        | B73=F1<Mo17         | 1.38                     | 4                   | >dbj BAB11740.1  TaWIN2 [Triticum aestivum]                                                                                                                                                                                                                                                                                                                                                                                                                                                                                                                       | 259   | 1E-32   |
|                       |                 |                     |                          |                     | >ref XP_482989.1  putative TaWIN2 [Oryza sativa (japonica cultivar-group)]gb AAO72644.1  TaWIN2-like protein [Oryza sativa (japonica cultivar-group)] gb AAO72553.1  WIN2-like protein [Oryza sativa (japonica cultivar-group)] dbj BAD10275.1  putative TaWIN2 [Oryza sativa (japonica cultivar-group)]                                                                                                                                                                                                                                                          | 264   | 1E-31   |
|                       |                 |                     |                          |                     | dbj BAD09765.1  putative TaWIN2 [Oryza sativa (japonica cultivar-group)]                                                                                                                                                                                                                                                                                                                                                                                                                                                                                          | 176   | 1E-31   |
|                       |                 |                     |                          |                     | >emb CAE54082.1  14-3-3 protein [Fagus sylvatica]                                                                                                                                                                                                                                                                                                                                                                                                                                                                                                                 | 262   | 2E-31   |
|                       |                 |                     |                          |                     | >gb AAF76226.1  14-3-3 protein [Populus x canescens]                                                                                                                                                                                                                                                                                                                                                                                                                                                                                                              | 275   | 2E-31   |
|                       |                 |                     |                          |                     | >emb CAA53700.1  14-3-3 protein 32kDa endonuclease [Cucurbita pepo]prf 2107305A nuclear matrix endonuclease                                                                                                                                                                                                                                                                                                                                                                                                                                                       | 653   | 5E-89   |
| DV622317              | 8.03E-03        | B73<F1=Mo17         | 1.34                     | 3                   | group])                                                                                                                                                                                                                                                                                                                                                                                                                                                                                                                                                           | 647   | 2E-71   |
|                       |                 |                     |                          |                     | >ref NP_177656.2  FMN binding / catalytic/ electron transporter/ iron ion binding / oxidoreductase [Arabidopsis thaliana] gb AAM45053.1  unknown protein [Arabidopsis thaliana] gb AAL87267.1  unknown protein [Arabidopsis thaliana]                                                                                                                                                                                                                                                                                                                             | 654   | 2E-71   |
|                       |                 |                     |                          |                     | >gb AAG12693.1  unknown protein; 42527-45275 [Arabidopsis thaliana]                                                                                                                                                                                                                                                                                                                                                                                                                                                                                               | 797   | 4E-49   |
|                       |                 |                     |                          |                     | >ref XP_690774.1  PREDICTED: similar to radical S-adenosyl methionine and flavodoxin domains 1 [Danio rerio]                                                                                                                                                                                                                                                                                                                                                                                                                                                      | 680   | 4E-48   |
|                       |                 |                     |                          |                     | >emb CAG12739.1  unnamed protein product [Tetraodon nigroviridis]                                                                                                                                                                                                                                                                                                                                                                                                                                                                                                 |       |         |
| CB334444              | 8.03E-03        | B73=F1<Mo17         | 1.54                     | 4                   | ns                                                                                                                                                                                                                                                                                                                                                                                                                                                                                                                                                                |       |         |
| DV550130              | 8.04E-03        | Mo17<B73=F1         | 1.3                      | 10                  | >gb AAC19375.1  acireductone dioxygenase 2 [Oryza sativa]                                                                                                                                                                                                                                                                                                                                                                                                                                                                                                         | 198   | 6E-90   |
|                       |                 |                     |                          |                     | >gb AA55895.1  aci-reductone dioxygenase-like protein [Oryza sativa (japonica cultivar-group)]                                                                                                                                                                                                                                                                                                                                                                                                                                                                    | 198   | 1E-89   |
|                       |                 |                     |                          |                     | >gb AAN06863.1  Putative probable submergence induced, nickel-binding protein 2A [Oryza sativa (japonica cultivar-group)]                                                                                                                                                                                                                                                                                                                                                                                                                                         | 254   | 7E-88   |
|                       |                 |                     |                          |                     | >dbj BAB61039.1  iron-deficiency induced gene [Hordeum vulgare]                                                                                                                                                                                                                                                                                                                                                                                                                                                                                                   | 198   | 2E-86   |
|                       |                 |                     |                          |                     | >ref NP_921506.1  putative zinc finger protein ID1 [Oryza sativa (japonica cultivar-group)]                                                                                                                                                                                                                                                                                                                                                                                                                                                                       | 230   | 4E-79   |
| DV550103              | 8.08E-03        | F1=Mo17<B73         | 1.5                      | 9                   | >ref XP_473776.1  OSJNBa0041A02.14 [Oryza sativa (japonica cultivar-group)]emb CAD41867.2  OSJNBa0041A02.14 [Oryza sativa (japonica cultivar-group)]                                                                                                                                                                                                                                                                                                                                                                                                              | 396   | e-103   |
|                       |                 |                     |                          |                     | >gb AAM65412.1  pectin acetyltransferase [Arabidopsis thaliana]                                                                                                                                                                                                                                                                                                                                                                                                                                                                                                   | 391   | 1E-81   |
|                       |                 |                     |                          |                     | >ref NP_567585.1  carboxylic ester hydrolase [Arabidopsis thaliana]gb AAL47339.1  putative pectinacetyltransferase protein [Arabidopsis thaliana] gb AAK96722.1  putative pectinacetyltransferase protein [Arabidopsis thaliana] gb AAM64921.1  putative pectinacetyltransferase protein [Arabidopsis thaliana]                                                                                                                                                                                                                                                   | 391   | 1E-80   |
|                       |                 |                     |                          |                     | >ref NP_199341.1  carboxylic ester hydrolase [Arabidopsis thaliana]gb AAL15296.1  AT5g45280/K9E15_6 [Arabidopsis thaliana] dbj BAB10249.1  pectin acetyltransferase [Arabidopsis thaliana]                                                                                                                                                                                                                                                                                                                                                                        | 391   | 1E-80   |
|                       |                 |                     |                          |                     | >emb CAA67728.1  pectinacetyltransferase precursor [Vigna radiata var. radiata]                                                                                                                                                                                                                                                                                                                                                                                                                                                                                   | 399   | 1E-79   |
| BM337359              | 8.12E-03        | F1<B73              | 3.42                     | 8                   | >dbj BAD82225.1  putative wound inducive gene [Oryza sativa (japonica cultivar-group)] dbj BAD81783.1  putative wound inducive gene [Oryza sativa (japonica cultivar-group)]                                                                                                                                                                                                                                                                                                                                                                                      | 331   | 1E-14   |
|                       |                 |                     |                          |                     | >gb AAS79233.1  rust resistance protein rp3-1 [Zea mays]                                                                                                                                                                                                                                                                                                                                                                                                                                                                                                          | 1258  | 9E-13   |
|                       |                 |                     |                          |                     | >ref XP_481915.1  putative wound inducive gene [Oryza sativa (japonica cultivar-group)] dbj BAD03758.1  putative wound inducive gene [Oryza sativa (japonica cultivar-group)]                                                                                                                                                                                                                                                                                                                                                                                     | 215   | 2E-10   |
|                       |                 |                     |                          |                     | >ref XP_481914.1  putative wound inducive gene [Oryza sativa (japonica cultivar-group)] ref XP_507201.1  PREDICTED P0426E02.15-2 gene product [Oryza sativa (japonica cultivar-group)] dbj BAD03757.1  putative wound inducive gene [Oryza sativa (japonica cultivar-group)]                                                                                                                                                                                                                                                                                      | 325   | 2E-10   |
|                       |                 |                     |                          |                     | >dbj BAA95791.1  wound inducive gene [Nicotiana tabacum]                                                                                                                                                                                                                                                                                                                                                                                                                                                                                                          | 317   | 8E-6    |
|                       |                 |                     |                          |                     | >ref XP_476024.1  putative vacuolar ATP synthase subunit C [Oryza sativa (japonica cultivar-group)] gb AAT44305.1  putative vacuolar ATP synthase subunit C [Oryza sativa (japonica cultivar-group)]                                                                                                                                                                                                                                                                                                                                                              | 377   | 1E-6    |
| CB251993              | 8.13E-03        | Mo17<B73=F1         | 1.25                     | 11                  | >ref XP_466184.1  transcriptional coactivator p15 (PC4) family protein-like [Oryzasativa (japonica cultivar-group)] dbj BAD33299.1  transcriptional coactivator p15 (PC4) family protein-like [Oryza sativa (japonica cultivar-group)]                                                                                                                                                                                                                                                                                                                            | 101   | 4E-31   |
| DV491809              | 8.13E-03        | B73<F1=Mo17         | 1.52                     | 3                   |                                                                                                                                                                                                                                                                                                                                                                                                                                                                                                                                                                   |       |         |



**Table 4. Microarray analysis results, mode of gene action classification, and BLAST annotation for the 1,367 ESTs identified as differentially expressed among genotypes (15% FDR)**

| GenBank accession no. | Overall P value | Significant pattern | Fold change <sup>±</sup> | Sector <sup>±</sup> | BLAST annotation*                                                                                                                                                                                                                                                                                                                                                                                                                                                                                                                                                                                                                                                                                         | Score | E value |
|-----------------------|-----------------|---------------------|--------------------------|---------------------|-----------------------------------------------------------------------------------------------------------------------------------------------------------------------------------------------------------------------------------------------------------------------------------------------------------------------------------------------------------------------------------------------------------------------------------------------------------------------------------------------------------------------------------------------------------------------------------------------------------------------------------------------------------------------------------------------------------|-------|---------|
|                       |                 |                     |                          |                     | >ref NP_196487.1  KIWI; DNA binding / transcription coactivator [Arabidopsisthaliana] emb CAC05451.1  putative transcriptional co-activator (KIWI) [Arabidopsis thaliana] gb AAC08574.1  putative transcriptional co-activator [Arabidopsis thaliana] gb AAO44011.1  At5g09250 [Arabidopsis thaliana] pir T52113 probable transcription co-activator KIWI [imported] - Arabidopsis thaliana sp O65154 KIWI ARATH RNA polymerase II transcriptional coactivator KIWI                                                                                                                                                                                                                                       | 107   | 3E-16   |
|                       |                 |                     |                          |                     | >ref NP_192830.1  KELP; DNA binding / transcription coactivator [Arabidopsisthaliana] emb CAB81193.1  putative protein [Arabidopsis thaliana] emb CAB40060.1  putative protein [Arabidopsis thaliana] gb AAC08575.1  putative transcriptional co-activator [Arabidopsis thaliana] gb AAM63108.1  putative transcriptional coactivator [Arabidopsis thaliana] gb AAO64782.1  At4g10920 [Arabidopsis thaliana] gb AAC33951.1  contains similarity to RNA polymerase II transcription cofactor p15 [Arabidopsis thaliana] pir T52114 probable transcription co-activator KELP [imported] - Arabidopsis thaliana sp O65155 KELP_ARATH RNA polymerase II transcriptional coactivator KELP                      | 165   | 4E-10   |
|                       |                 |                     |                          |                     | >dbj BAB41214.1  putative transcriptional coactivator [Brassica rapa]                                                                                                                                                                                                                                                                                                                                                                                                                                                                                                                                                                                                                                     | 165   | 6E-10   |
|                       |                 |                     |                          |                     | >ref NP_916536.1  P0684B02.23 [Oryza sativa (japonica cultivar-group)]dbj BAB86514.1  transcriptional coactivator-like [Oryza sativa (japonica cultivar-group)] dbj BAB44036.1  transcriptional coactivator-like [Oryza sativa (japonica cultivar-group)]                                                                                                                                                                                                                                                                                                                                                                                                                                                 | 184   | 2E-9    |
| CB816361              | 8.22E-03        | B73=F1<Mo17         | 1.29                     | 4                   | >gb AAK40308.1  putative methyl-binding domain protein MBD106 [Zea mays]                                                                                                                                                                                                                                                                                                                                                                                                                                                                                                                                                                                                                                  | 428   | 2E-56   |
|                       |                 |                     |                          |                     | >gb AAK40307.1  putative methyl-binding domain protein MBD105 [Zea mays]                                                                                                                                                                                                                                                                                                                                                                                                                                                                                                                                                                                                                                  | 433   | 1E-50   |
|                       |                 |                     |                          |                     | >gb ABA99897.1  methyl-binding domain protein MBD106, putative [Oryza sativa(japonica cultivar-group)]                                                                                                                                                                                                                                                                                                                                                                                                                                                                                                                                                                                                    | 303   | 3E-48   |
|                       |                 |                     |                          |                     | >gb AAW56447.1  putative methyl-binding domain protein MBD115 [Zea mays]                                                                                                                                                                                                                                                                                                                                                                                                                                                                                                                                                                                                                                  | 364   | 5E-35   |
|                       |                 |                     |                          |                     | >gb AAM93219.1  methyl binding domain protein MBD109 [Zea mays]                                                                                                                                                                                                                                                                                                                                                                                                                                                                                                                                                                                                                                           | 400   | 7E-33   |
| CB351734              | 8.23E-03        | Mo17<B73=F1         | 1.27                     | 11                  | >dbj BAD73292.1  putative ATP-dependent Clp protease, proteolytic subunit [Oryzasativa (japonica cultivar-group)]                                                                                                                                                                                                                                                                                                                                                                                                                                                                                                                                                                                         | 308   | 3E-62   |
|                       |                 |                     |                          |                     | >ref NP_918617.1  putative ATP-dependent Clp protease [Oryza sativa (japonicacultivar-group)]                                                                                                                                                                                                                                                                                                                                                                                                                                                                                                                                                                                                             | 317   | 3E-62   |
|                       |                 |                     |                          |                     | >dbj BAA85451.1  S-locus protein 2 [Brassica rapa]                                                                                                                                                                                                                                                                                                                                                                                                                                                                                                                                                                                                                                                        | 311   | 5E-51   |
|                       |                 |                     |                          |                     | >emb CAC80640.1  ClpP putative protein [Brassica napus]                                                                                                                                                                                                                                                                                                                                                                                                                                                                                                                                                                                                                                                   | 313   | 1E-50   |
|                       |                 |                     |                          |                     | >emb CAB89185.1  ClpP [Brassica napus var. napus]                                                                                                                                                                                                                                                                                                                                                                                                                                                                                                                                                                                                                                                         | 313   | 1E-50   |
| CB334461              | 8.23E-03        | B73=F1<Mo17         | 1.54                     | 4                   | >ref XP_474303.1  OSJNBb0004A17.1 [Oryza sativa (japonica cultivar-group)]                                                                                                                                                                                                                                                                                                                                                                                                                                                                                                                                                                                                                                | 492   | 5E-18   |
|                       |                 |                     |                          |                     | >emb CAE03599.2  OSJNBb0004A17.1 [Oryza sativa (japonica cultivar-group)]                                                                                                                                                                                                                                                                                                                                                                                                                                                                                                                                                                                                                                 | 496   | 5E-18   |
|                       |                 |                     |                          |                     | >ref XP_474302.1  OSJNBa0043A12.39 [Oryza sativa (japonica cultivar-group)]emb CAE02834.1  OSJNBa0043A12.39 [Oryza sativa (japonica cultivar-group)]                                                                                                                                                                                                                                                                                                                                                                                                                                                                                                                                                      | 487   | 9E-14   |
|                       |                 |                     |                          |                     | >gb AAL75899.1  At2g43020/MFL8.12 [Arabidopsis thaliana]                                                                                                                                                                                                                                                                                                                                                                                                                                                                                                                                                                                                                                                  | 490   | 4E-10   |
|                       |                 |                     |                          |                     | >ref NP_181830.1  amine oxidase/ oxidoreductase [Arabidopsis thaliana]gb AAD22129.1  putative amine oxidase [Arabidopsis thaliana] gb AAO85404.1  putative amine oxidase 1 [Arabidopsis thaliana]                                                                                                                                                                                                                                                                                                                                                                                                                                                                                                         | 490   | 4E-10   |
| CD527790              | 8.24E-03        | B73<F1=Mo17         | 1.29                     | 3                   | >gb AAX55895.1  aci-reductone dioxygenase-like protein [Oryza sativa (japonicacultivar-group)]                                                                                                                                                                                                                                                                                                                                                                                                                                                                                                                                                                                                            | 198   | e-101   |
|                       |                 |                     |                          |                     | >gb AAC19375.1  acireductone dioxygenase 2 [Oryza sativa]                                                                                                                                                                                                                                                                                                                                                                                                                                                                                                                                                                                                                                                 | 198   | e-101   |
|                       |                 |                     |                          |                     | >dbj BAB61039.1  iron-deficiency induced gene [Hordeum vulgare]                                                                                                                                                                                                                                                                                                                                                                                                                                                                                                                                                                                                                                           | 198   | 1E-97   |
|                       |                 |                     |                          |                     | >gb AAN06863.1  Putative probable submergence induced, nickel-binding protein 2A[Oryza sativa (japonica cultivar-group)]                                                                                                                                                                                                                                                                                                                                                                                                                                                                                                                                                                                  | 254   | 3E-97   |
|                       |                 |                     |                          |                     | >gb AAC05511.1  acireductone dioxygenase 1 [Oryza sativa]                                                                                                                                                                                                                                                                                                                                                                                                                                                                                                                                                                                                                                                 | 199   | 2E-95   |
| CD651132              | 8.29E-03        | Mo17<B73=F1         | 1.29                     | 11                  | >ref NP_922859.1  unknown protein [Oryza sativa (japonica cultivar-group)]gb AAL67597.1  unknown protein [Oryza sativa] gb AAP55146.1  expressed protein [Oryza sativa (japonica cultivar-group)]                                                                                                                                                                                                                                                                                                                                                                                                                                                                                                         | 99    | 7E-34   |
|                       |                 |                     |                          |                     | >ref NP_564394.1  unknown protein [Arabidopsis thaliana]gb AAM63599.1  unknown [Arabidopsis thaliana] gb AAG60169.1  unknown protein [Arabidopsis thaliana] gb AAO64124.1  unknown protein [Arabidopsis thaliana] gb AAO42198.1  unknown protein [Arabidopsis thaliana]                                                                                                                                                                                                                                                                                                                                                                                                                                   | 100   | 2E-9    |
|                       |                 |                     |                          |                     | >gb AAF81326.1  Strong similarity to an unknown protein F19D11.4 gi 7485759 fromArabidopsis thaliana BAC F19D11 gb AC005310. EST gb AV535485 comes from this gene                                                                                                                                                                                                                                                                                                                                                                                                                                                                                                                                         | 647   | 2E-9    |
| CB833491              | 8.31E-03        | B73=F1<Mo17         | 5.56                     | 4                   | >gb AAO72686.1  putative myosin heavy chain [Oryza sativa (japonicacultivar-group)]                                                                                                                                                                                                                                                                                                                                                                                                                                                                                                                                                                                                                       | 455   | 2E-32   |
|                       |                 |                     |                          |                     | >gb ABA99627.1  hypothetical protein LOC_Os12g44340 [Oryza sativa (japonicacultivar-group)]                                                                                                                                                                                                                                                                                                                                                                                                                                                                                                                                                                                                               | 567   | 2E-32   |
|                       |                 |                     |                          |                     | >dbj BAD45984.1  myosin II heavy chain-like [Oryza sativa (japonica cultivar-group)]                                                                                                                                                                                                                                                                                                                                                                                                                                                                                                                                                                                                                      | 608   | 6E-19   |
|                       |                 |                     |                          |                     | >ref XP_467670.1  putative myosin II heavy chain [Oryza sativa (japonicacultivar-group)] dbj BAD15899.1  putative myosin II heavy chain [Oryza sativa (japonica cultivar-group)]                                                                                                                                                                                                                                                                                                                                                                                                                                                                                                                          | 599   | 8E-19   |
|                       |                 |                     |                          |                     | >gb AAN33201.1  At1g68060/T23K23_9 [Arabidopsis thaliana]gb AAM91095.1  At1g68060/T23K23_9 [Arabidopsis thaliana]                                                                                                                                                                                                                                                                                                                                                                                                                                                                                                                                                                                         | 634   | 3E-18   |
| BM074811              | 8.32E-03        | Mo17<B73=F1         | 1.31                     | 10                  | >sp P27787 FER1_MAIZE Ferredoxin-1, chloroplast precursor (Ferredoxin I) (Fd I)gb AAA33460.1  ferredoxin gb AAA33459.1  ferredoxin prf 1907324B ferredoxin:ISOTYPE-I                                                                                                                                                                                                                                                                                                                                                                                                                                                                                                                                      | 150   | 5E-44   |
|                       |                 |                     |                          |                     | >pdb 1GAQ B Chain B, Crystal Structure Of The Complex Between Ferredoxin AndFerredoxin-Nadp+ Reductase                                                                                                                                                                                                                                                                                                                                                                                                                                                                                                                                                                                                    | 98    | 3E-33   |
|                       |                 |                     |                          |                     | >sp P27789 FERS_MAIZE Ferredoxin-5, chloroplast precursor (Ferredoxin V) (Fd V)gb AAA33462.1  ferredoxin prf 1907324A ferredoxin:ISOTYPE=V                                                                                                                                                                                                                                                                                                                                                                                                                                                                                                                                                                | 135   | 2E-29   |
|                       |                 |                     |                          |                     | >ref XP_479678.1  Ferredoxin I, chloroplast precursor [Oryza sativa (japonicacultivar-group)] ref XP_507559.1  PREDICTED OJ1300_E01.1 gene product [Oryza sativa (japonica cultivar-group)] ref XP_507558.1  PREDICTED OJ1300_E01.1 gene product [Oryza sativa (japonica cultivar-group)] ref XP_507082.1  PREDICTED OJ1300_E01.1 gene product [Oryza sativa (japonica cultivar-group)] dbj BAD08924.1  Ferredoxin I, chloroplast precursor [Oryza sativa (japonica cultivar-group)] sp P11051 FER1_ORYSA Ferredoxin-1, chloroplast precursor (Ferredoxin I) (Anti-disease protein 1) pir FERZ ferredoxin [2Fe-2S] I precursor - rice dbj BAA06436.1  ferredoxin [Oryza sativa (japonica cultivar-group)] | 139   | 4E-29   |

**Table 4. Microarray analysis results, mode of gene action classification, and BLAST annotation for the 1,367 ESTs identified as differentially expressed among genotypes (15% FDR)**

| GenBank accession no. | Overall P value | Significant pattern | Fold change <sup>†</sup> | Sector <sup>‡</sup> | BLAST annotation*                                                                                                                                                                                                                                                                                                                                                                                                                                                                                                                                                                                                                                                                                                                                                                                                                                                                                                                                                                                                                                                                                                                                                                                                                                                | Score | E value |
|-----------------------|-----------------|---------------------|--------------------------|---------------------|------------------------------------------------------------------------------------------------------------------------------------------------------------------------------------------------------------------------------------------------------------------------------------------------------------------------------------------------------------------------------------------------------------------------------------------------------------------------------------------------------------------------------------------------------------------------------------------------------------------------------------------------------------------------------------------------------------------------------------------------------------------------------------------------------------------------------------------------------------------------------------------------------------------------------------------------------------------------------------------------------------------------------------------------------------------------------------------------------------------------------------------------------------------------------------------------------------------------------------------------------------------|-------|---------|
|                       |                 |                     |                          |                     | >gb AAL77198.1  anti-disease protein 1 [Oryza sativa]                                                                                                                                                                                                                                                                                                                                                                                                                                                                                                                                                                                                                                                                                                                                                                                                                                                                                                                                                                                                                                                                                                                                                                                                            | 138   | 4E-29   |
| BM080544              | 8.33E-03        | Mo17<B73            | 1.9                      | 9                   | ns                                                                                                                                                                                                                                                                                                                                                                                                                                                                                                                                                                                                                                                                                                                                                                                                                                                                                                                                                                                                                                                                                                                                                                                                                                                               |       |         |
| BM350025              | 8.36E-03        | F1=Mo17<B73         | 2.02                     | 9                   | >ref XP_466672.1  unknown protein [Oryza sativa (japonica cultivar-group)]dbj BAD19228.1  unknown protein [Oryza sativa (japonica cultivar-group)]<br>>ref NP_567794.1  unknown protein [Arabidopsis thaliana]gb AAK93722.1  unknown protein [Arabidopsis thaliana] gb AAK25999.1  unknown protein [Arabidopsis thaliana]<br>>gb AAM64668.1  unknown [Arabidopsis thaliana]<br>>emb CAB79604.1  putative protein [Arabidopsis thaliana]emb CAB36771.1  putative protein [Arabidopsis thaliana]                                                                                                                                                                                                                                                                                                                                                                                                                                                                                                                                                                                                                                                                                                                                                                   | 156   | 5E-35   |
| DV494450              | 8.37E-03        | B73<F1=Mo17         | 1.36                     | 3                   | >dbj BAD46209.1  putative inosine-uridine nucleoside N-ribohydrolase [Oryza sativa(japonica cultivar-group)]<br>>ref XP_483754.1  putative inosine-uridine nucleoside N-ribohydrolase [Oryza sativa(japonica cultivar-group)] dbj BAD09089.1  putative inosine-uridine nucleoside N-ribohydrolase [Oryza sativa (japonica cultivar-group)]<br>>gb AAT00629.1  putative inosine-uridine preferring nucleoside hydrolase [Zea mays]<br>>ref NP_565843.1  hydrolase [Arabidopsis thaliana]gb AAD21435.2  expressed protein [Arabidopsis thaliana] gb AAL47407.1  At2g36310/F2H17.8 [Arabidopsis thaliana] gb AAL06843.1  At2g36310/F2H17.8 [Arabidopsis thaliana] gb AAM63615.1  unknown [Arabidopsis thaliana]<br>>ref XP_468759.1  putative inosine-uridine preferring nucleoside hydrolase [Oryzasativa (japonica cultivar-group)] gb AAP20832.1  putative inosine-uridine preferring nucleoside hydrolase [Oryza sativa (japonica cultivar-group)]                                                                                                                                                                                                                                                                                                              | 337   | 3E-52   |
| BG840722              | 8.39E-03        | F1=Mo17<B73         | 1.62                     | 9                   | ns                                                                                                                                                                                                                                                                                                                                                                                                                                                                                                                                                                                                                                                                                                                                                                                                                                                                                                                                                                                                                                                                                                                                                                                                                                                               |       |         |
| CD568656              | 8.40E-03        | Mo17<B73            | 1.36                     | 9                   | >ref XP_475141.1  unknown protein [Oryza sativa (japonica cultivar-group)]gb AAT58828.1  unknown protein [Oryza sativa (japonica cultivar-group)]<br>>ref NP_914950.1  P0492G09.23 [Oryza sativa (japonica cultivar-group)]dbj BAB64201.1  putative succinate dehydrogenase subunit 4 [Oryza sativa (japonica cultivar-group)]<br>>gb AAK97388.1  succinate dehydrogenase subunit 4 [Oryza sativa]                                                                                                                                                                                                                                                                                                                                                                                                                                                                                                                                                                                                                                                                                                                                                                                                                                                               | 200   | 3E-18   |
| CB329592              | 8.42E-03        | Mo17<B73            | 1.24                     | 10                  | >emb CAE04894.3  OSJNBa0042115.16 [Oryza sativa (japonica cultivar-group)]sp Q7XLX6 S1FA2 ORYSA DNA-binding protein S1FA2<br>>emb CAE04896.3  OSJNBa0042115.18 [Oryza sativa (japonica cultivar-group)]sp P42553 S1FA1 ORYSA DNA-binding protein S1FA1                                                                                                                                                                                                                                                                                                                                                                                                                                                                                                                                                                                                                                                                                                                                                                                                                                                                                                                                                                                                           | 80    | 1E-7    |
| CB350798              | 8.43E-03        | F1=Mo17<B73         | 2.43                     | 9                   | ns                                                                                                                                                                                                                                                                                                                                                                                                                                                                                                                                                                                                                                                                                                                                                                                                                                                                                                                                                                                                                                                                                                                                                                                                                                                               |       |         |
| DV493666              | 8.44E-03        | Mo17<B73=F1         | 1.39                     | 11                  | >ref XP_475712.1  putative GTP-binding protein Rab7a [Oryza sativa (japonicacultivar-group)] gb AAT01314.1  putative GTP-binding protein Rab7a [Oryza sativa (japonica cultivar-group)]<br>>sp Q40787 RAB7 PENCL Ras-related protein Rab7 (Possible apospory-associated protein)gb AAA85273.1  possible apospory-associated protein<br>>gb AAO67728.1  small GTP binding protein [Oryza sativa (indica cultivar-group)]<br>>sp O24461 RAB7 PRUAR Ras-related protein Rab7gb AAB71504.1  Rab7 GTP binding protein [Prunus armeniaca]<br>>emb CAA98171.1  RAB7D [Lotus corniculatus var. japonicus]                                                                                                                                                                                                                                                                                                                                                                                                                                                                                                                                                                                                                                                                | 206   | 4E-91   |
| DV621398              | 8.48E-03        | B73<Mo17            | 1.4                      | 4                   | >ref XP_482468.1  putative methylcrotonyl-CoA carboxylase beta chain, mitochondrialprecursor [Oryza sativa (japonica cultivar-group)] dbj BAC99804.1  putative methylcrotonyl-CoA carboxylase beta chain, mitochondrial precursor [Oryza sativa (japonica cultivar-group)]<br>>ref NP_567950.1  MCCB (3-METHYLCROTONYL-COA CARBOXYLASE); biotin carboxylase[Arabidopsis thaliana] gb AAN15703.1  Unknown protein [Arabidopsis thaliana] gb AAF35259.1  3-methylcrotonyl-CoA carboxylase nonbiotinylated subunit [Arabidopsis thaliana] gb AAF35258.1  3-methylcrotonyl-CoA carboxylase non-biotinylated subunit [Arabidopsis thaliana] sp Q9LDD8 MCCB_ARATH Methylcrotonoyl-CoA carboxylase beta chain, mitochondrial precursor (3-Methylcrotonyl-CoA carboxylase 2) (MCCase beta subunit) (3-methylcrotonyl-CoA:carbon dioxide ligase beta subunit)<br>>gb AAK62371.1  Unknown protein [Arabidopsis thaliana]<br>>emb CAB80120.1  putative protein [Arabidopsis thaliana]emb CAA17569.1  putative protein [Arabidopsis thaliana] pir T05433 hypothetical protein F28A23.210 - Arabidopsis thaliana<br>>ref ZP_00776070.1  Propionyl-CoA carboxylase [Pseudoalteromonas atlantica T6c]gb EAO67369.1  Propionyl-CoA carboxylase [Pseudoalteromonas atlantica T6c] | 572   | e-106   |
| DV491545              | 8.48E-03        | F1=Mo17<B73         | 1.45                     | 9                   | >ref NP_566336.1  unknown protein [Arabidopsis thaliana]ref NP_850544.1  unknown protein [Arabidopsis thaliana] gb AAF07835.1  unknown protein [Arabidopsis thaliana] gb AAM63170.1  unknown [Arabidopsis thaliana]<br>>gb AAV43812.1  unknown protein [Oryza sativa (japonica cultivar-group)]gb AAV43807.1  unknown protein [Oryza sativa (japonica cultivar-group)]<br>>ref NP_198523.1  unknown protein [Arabidopsis thaliana]gb AAQ65141.1  At5g37070 [Arabidopsis thaliana] dbj BAD44258.1  putative protein [Arabidopsis thaliana] dbj BAD43875.1  putative protein [Arabidopsis thaliana] dbj BAB11359.1  unnamed protein product [Arabidopsis thaliana]<br>>ref NP_195781.1  unknown protein [Arabidopsis thaliana]emb CAB82277.1  putative protein [Arabidopsis thaliana] gb AAM63344.1  unknown [Arabidopsis thaliana] sp Q9M015 Y5161 ARATH Protein At5g01610<br>>ref NP_918452.1  OSJNBb0049O23.18 [Oryza sativa (japonica cultivar-group)]dbj BAB90059.1  hypothetical protein [Oryza sativa (japonica cultivar-group)] dbj BAB64677.1  hypothetical protein [Oryza sativa (japonica cultivar-group)]                                                                                                                                              | 170   | 9E-45   |
| CB250082              | 8.50E-03        | Mo17<B73=F1         | 1.36                     | 10                  | ns                                                                                                                                                                                                                                                                                                                                                                                                                                                                                                                                                                                                                                                                                                                                                                                                                                                                                                                                                                                                                                                                                                                                                                                                                                                               |       |         |
| DV490400              | 8.52E-03        | Mo17<B73=F1         | 1.28                     | 11                  | >gb AAC08009.1  DnaJ-related protein ZMDJ1 [Zea mays]<br>>gb AAX95135.1  DnaJ protein, putative [Oryza sativa (japonica cultivar-group)]<br>>gb AAU89194.1  DnaJ protein, putative [Oryza sativa (japonica cultivar-group)]gb AAO72551.1  DNAJ-like protein [Oryza sativa (japonica cultivar-group)]                                                                                                                                                                                                                                                                                                                                                                                                                                                                                                                                                                                                                                                                                                                                                                                                                                                                                                                                                             | 419   | 5E-34   |
|                       |                 |                     |                          |                     |                                                                                                                                                                                                                                                                                                                                                                                                                                                                                                                                                                                                                                                                                                                                                                                                                                                                                                                                                                                                                                                                                                                                                                                                                                                                  | 416   | 8E-30   |
|                       |                 |                     |                          |                     |                                                                                                                                                                                                                                                                                                                                                                                                                                                                                                                                                                                                                                                                                                                                                                                                                                                                                                                                                                                                                                                                                                                                                                                                                                                                  | 417   | 8E-30   |

**Table 4. Microarray analysis results, mode of gene action classification, and BLAST annotation for the 1,367 ESTs identified as differentially expressed among genotypes (15% FDR)**

| GenBank accession no. | Overall P value | Significant pattern | Fold change <sup>†</sup> | Sector <sup>‡</sup> | BLAST annotation*                                                                                                                                                                                                                                                                                                                                                                                                                                                      | Score | E value |
|-----------------------|-----------------|---------------------|--------------------------|---------------------|------------------------------------------------------------------------------------------------------------------------------------------------------------------------------------------------------------------------------------------------------------------------------------------------------------------------------------------------------------------------------------------------------------------------------------------------------------------------|-------|---------|
|                       |                 |                     |                          |                     | >dbj BAA35121.1  DnaJ homolog [Salix gilgiana]                                                                                                                                                                                                                                                                                                                                                                                                                         | 420   | 1E-25   |
|                       |                 |                     |                          |                     | >gb AAG24643.1  J2P [Daucus carota]gb AAG24642.1  J1P [Daucus carota]                                                                                                                                                                                                                                                                                                                                                                                                  | 418   | 6E-25   |
| BM073225              | 8.62E-03        | Mo17<B73            | 2.17                     | 9                   | >ref XP_479158.1  unknown protein [Oryza sativa (japonica cultivar-group)]ref XP_506466.1  PREDICTED P0616D06.125 gene product [Oryza sativa (japonica cultivar-group)] dbj BAC16504.1  unknown protein [Oryza sativa (japonica cultivar-group)]                                                                                                                                                                                                                       | 244   | 1E-16   |
|                       |                 |                     |                          |                     | >ref XP_470898.1  unknown protein [Oryza sativa (japonica cultivar-group)]gb AAP03360.1  unknown protein [Oryza sativa (japonica cultivar-group)]                                                                                                                                                                                                                                                                                                                      | 228   | 3E-13   |
|                       |                 |                     |                          |                     | >dbj BAD36140.1  unknown protein [Oryza sativa (japonica cultivar-group)]dbj BAD36082.1  unknown protein [Oryza sativa (japonica cultivar-group)]                                                                                                                                                                                                                                                                                                                      | 232   | 5E-6    |
| BM337696              | 8.63E-03        | B73=F1<Mo17         | 2.3                      | 4                   | ns                                                                                                                                                                                                                                                                                                                                                                                                                                                                     |       |         |
| CD651121              | 8.64E-03        | B73=Mo17<F1         | 1.47                     | 12                  | >gb AAF71261.2  beta-glucosidase aggregating factor precursor [Zea mays]                                                                                                                                                                                                                                                                                                                                                                                               | 306   | 3E-35   |
|                       |                 |                     |                          |                     | >gb ABA96667.1  jacalin homolog [Oryza sativa (japonica cultivar-group)]                                                                                                                                                                                                                                                                                                                                                                                               | 307   | 2E-33   |
|                       |                 |                     |                          |                     | >gb ABA97248.1  jacalin homolog [Oryza sativa (japonica cultivar-group)]gb ABB51090.1  mannose-specific jacalin-related lectin [Oryza sativa (japonica cultivar-group)]                                                                                                                                                                                                                                                                                                | 306   | 8E-33   |
|                       |                 |                     |                          |                     | >gb AAR20919.1  jasmonate-induced protein [Triticum aestivum]                                                                                                                                                                                                                                                                                                                                                                                                          | 304   | 2E-32   |
|                       |                 |                     |                          |                     | >gb AAB72098.1  32 kDa protein [Hordeum vulgare]                                                                                                                                                                                                                                                                                                                                                                                                                       | 306   | 9E-32   |
| DV494140              | 8.69E-03        | Mo17<B73=F1         | 1.33                     | 10                  | >dbj BAD45908.1  putative 50S ribosomal protein L24, chloroplast precursor [Oryzasativa (japonica cultivar-group)] dbj BAD45549.1  putative 50S ribosomal protein L24, chloroplast precursor [Oryza sativa (japonica cultivar-group)]                                                                                                                                                                                                                                  | 190   | 4E-82   |
|                       |                 |                     |                          |                     | >ref NP_851190.1  structural constituent of ribosome [Arabidopsis thaliana]gb AAP21381.1  At5g54600 [Arabidopsis thaliana] gb AAM63859.1  50S ribosomal protein L24, chloroplast precursor [Arabidopsis thaliana] dbj BAB09339.1  50S ribosomal protein L24, chloroplast precursor [Arabidopsis thaliana] gb AAN72001.1  50S ribosomal protein L24, chloroplast precursor [Arabidopsis thaliana] sp P92959 RK24_ARATH 50S ribosomal protein L24, chloroplast precursor | 198   | 2E-54   |
|                       |                 |                     |                          |                     | >emb CAA70851.1  plastid ribosomal protein [Arabidopsis thaliana]                                                                                                                                                                                                                                                                                                                                                                                                      | 198   | 5E-54   |
|                       |                 |                     |                          |                     | >sp Q02764 RK24_TOBAC 50S ribosomal protein L24, chloroplast precursor (CL24)gb AAA34114.1  ribosomal protein L24 gb AAA34086.1  ribosomal protein L24                                                                                                                                                                                                                                                                                                                 | 187   | 7E-54   |
|                       |                 |                     |                          |                     | >emb CAA32185.1  unnamed protein product [Pisum sativum]sp P11893 RK24_PEA 50S ribosomal protein L24, chloroplast precursor (CL24)                                                                                                                                                                                                                                                                                                                                     | 194   | 6E-53   |
| DV621757              | 8.70E-03        | B73<Mo17            | 1.36                     | 4                   | >dbj XP_483641.1  putative GTPase-activating protein GYP7 (GAP for YPT7) [Oryzasativa (japonica cultivar-group)] ref XP_507320.1  PREDICTED P0544G09.9 gene product [Oryza sativa (japonica cultivar-group)] dbj BAD09932.1  putative GTPase-activating protein GYP7 (GAP for YPT7) [Oryza sativa (japonica cultivar-group)]                                                                                                                                           | 565   | 6E-90   |
|                       |                 |                     |                          |                     | >dbj BAD33761.1  putative GTPase activating protein [Oryza sativa (japonicacultivar-group)]                                                                                                                                                                                                                                                                                                                                                                            | 579   | 5E-89   |
|                       |                 |                     |                          |                     | >gb AAY56433.1  At3g49350 [Arabidopsis thaliana]                                                                                                                                                                                                                                                                                                                                                                                                                       | 539   | 3E-80   |
|                       |                 |                     |                          |                     | >ref NP_190504.1  unknown protein [Arabidopsis thaliana]emb CAB66414.1  GTPase activating-like protein [Arabidopsis thaliana] gb AAG52193.1  putative GTPase activator protein of Rab-like small GTPases; 20638-18455 [Arabidopsis thaliana]                                                                                                                                                                                                                           | 554   | 3E-80   |
|                       |                 |                     |                          |                     | >ref NP_199009.2  unknown protein [Arabidopsis thaliana]dbj BAD44199.1  GTPase activator protein of Rab-like small GTPases-like protein [Arabidopsis thaliana]                                                                                                                                                                                                                                                                                                         | 549   | 3E-79   |
| DV491599              | 8.71E-03        | B73=F1<Mo17         | 1.61                     | 5                   | >gb AAQ89670.1  At2g22190 [Arabidopsis thaliana]gb AAD23621.1  putative trehalose-6-phosphate phosphatase [Arabidopsis thaliana]                                                                                                                                                                                                                                                                                                                                       | 269   | 7E-32   |
|                       |                 |                     |                          |                     | >ref NP_179809.2  catalytic/ trehalose-phosphatase [Arabidopsis thaliana]dbj BAD44683.1  putative trehalose-6-phosphate phosphatase [Arabidopsis thaliana]                                                                                                                                                                                                                                                                                                             | 354   | 7E-32   |
|                       |                 |                     |                          |                     | >ref XP_482349.1  putative trehalose-phosphatase [Oryza sativa (japonicacultivar-group)] dbj BAC99626.1  putative trehalose-phosphatase [Oryza sativa (japonica cultivar-group)]                                                                                                                                                                                                                                                                                       | 370   | 4E-31   |
|                       |                 |                     |                          |                     | >ref XP_467838.1  putative trehalose-6-phosphate phosphatase [Oryza sativa (japonicacultivar-group)] dbj BAD15563.1  putative trehalose-6-phosphate phosphatase [Oryza sativa (japonica cultivar-group)]                                                                                                                                                                                                                                                               | 367   | 1E-30   |
|                       |                 |                     |                          |                     | >dbj BAD37685.1  putative trehalose-phosphatase [Oryza sativa (japonicacultivar-group)]                                                                                                                                                                                                                                                                                                                                                                                | 510   | 7E-30   |
| CD651123              | 8.76E-03        | Mo17<B73=F1         | 1.34                     | 10                  | >gb AAF71261.2  beta-glucosidase aggregating factor precursor [Zea mays]                                                                                                                                                                                                                                                                                                                                                                                               | 306   | 1E-35   |
|                       |                 |                     |                          |                     | >gb ABA96667.1  jacalin homolog [Oryza sativa (japonica cultivar-group)]                                                                                                                                                                                                                                                                                                                                                                                               | 307   | 1E-34   |
|                       |                 |                     |                          |                     | >gb ABA97248.1  jacalin homolog [Oryza sativa (japonica cultivar-group)]gb ABB51090.1  mannose-specific jacalin-related lectin [Oryza sativa (japonica cultivar-group)]                                                                                                                                                                                                                                                                                                | 306   | 2E-34   |
|                       |                 |                     |                          |                     | >gb AAR20919.1  jasmonate-induced protein [Triticum aestivum]                                                                                                                                                                                                                                                                                                                                                                                                          | 304   | 3E-34   |
|                       |                 |                     |                          |                     | >gb AAA87041.1  putative 32.6 kDa jasmonate-induced protein [Hordeum vulgare]gb AAB72096.1  32 kDa protein [Hordeum vulgare]                                                                                                                                                                                                                                                                                                                                           | 304   | 3E-34   |
| CB603924              | 8.78E-03        | B73=Mo17<F1         | 1.36                     | 12                  | >gb AAA87042.1  putative 32.7 kDa jasmonate-induced protein [Hordeum vulgare]gb AAB72097.1  32 kDa protein [Hordeum vulgare]                                                                                                                                                                                                                                                                                                                                           | 304   | 2E-19   |
|                       |                 |                     |                          |                     | >gb AAB72098.1  32 kDa protein [Hordeum vulgare]                                                                                                                                                                                                                                                                                                                                                                                                                       | 306   | 7E-19   |
|                       |                 |                     |                          |                     | >gb AAA87041.1  putative 32.6 kDa jasmonate-induced protein [Hordeum vulgare]gb AAB72096.1  32 kDa protein [Hordeum vulgare]                                                                                                                                                                                                                                                                                                                                           | 304   | 7E-19   |
|                       |                 |                     |                          |                     | >gb ABA96667.1  jacalin homolog [Oryza sativa (japonica cultivar-group)]                                                                                                                                                                                                                                                                                                                                                                                               | 307   | 2E-18   |
|                       |                 |                     |                          |                     | >gb ABA96669.1  jakalin homolog [Oryza sativa (japonica cultivar-group)]                                                                                                                                                                                                                                                                                                                                                                                               | 258   | 1E-17   |
| BM334438              | 8.80E-03        | Mo17<B73            | 1.49                     | 10                  | >gb AAR99579.1  60S ribosomal protein L44 [Phalaenopsis hybrid cultivar]                                                                                                                                                                                                                                                                                                                                                                                               | 105   | 1E-38   |
|                       |                 |                     |                          |                     | >ref NP_911994.1  putative 60S ribosomal protein L44 [Oryza sativa (japonicacultivar-group)] dbj BAC15877.1  putative 60S ribosomal protein L44 [Oryza sativa (japonica cultivar-group)]                                                                                                                                                                                                                                                                               | 105   | 1E-38   |

**Table 4. Microarray analysis results, mode of gene action classification, and BLAST annotation for the 1,367 ESTs identified as differentially expressed among genotypes (15% FDR)**

| GenBank accession no. | Overall P value | Significant pattern | Fold change <sup>†</sup> | Sector <sup>‡</sup> | BLAST annotation*                                                                                                                                                                                                                                                                                                                                                                                                            | Score | E value |
|-----------------------|-----------------|---------------------|--------------------------|---------------------|------------------------------------------------------------------------------------------------------------------------------------------------------------------------------------------------------------------------------------------------------------------------------------------------------------------------------------------------------------------------------------------------------------------------------|-------|---------|
|                       |                 |                     |                          |                     | >gb AAK94425.1  60S ribosomal protein L144 [Brassica rapa subsp. pekinensis]                                                                                                                                                                                                                                                                                                                                                 | 119   | 3E-37   |
|                       |                 |                     |                          |                     | >ref NP_188981.1  structural constituent of ribosome [Arabidopsis thaliana]ref NP_193168.1  structural constituent of ribosome [Arabidopsis thaliana]                                                                                                                                                                                                                                                                        |       |         |
|                       |                 |                     |                          |                     | emb CAB10211.1  ribosomal protein [Arabidopsis thaliana] emb CAB78474.1  ribosomal protein [Arabidopsis thaliana] gb AAM10201.1  ribosomal protein [Arabidopsis thaliana] gb AAL3297.1  ribosomal protein [Arabidopsis thaliana] gb AAL32933.1  60S ribosomal protein L44-like [Arabidopsis thaliana]                                                                                                                        |       |         |
|                       |                 |                     |                          |                     | gb AAM63001.1  ribosomal protein [Arabidopsis thaliana] gb AAM61725.1  ribosomal protein [Arabidopsis thaliana] dbj BAB02283.1  60S ribosomal protein L44-like [Arabidopsis thaliana] sp O23290 RL44 ARATH 60S ribosomal protein L44 gb AAN65080.1  60S ribosomal protein L44-like [Arabidopsis thaliana]                                                                                                                    | 105   | 2E-36   |
|                       |                 |                     |                          |                     | >gb AAA34366.1  ribosomal protein L41                                                                                                                                                                                                                                                                                                                                                                                        | 105   | 2E-36   |
| BM334179              | 8.84E-03        | F1=Mo17<B73         | 1.39                     | 9                   | ns                                                                                                                                                                                                                                                                                                                                                                                                                           |       |         |
| CB250116              | 8.84E-03        | Mo17<B73=F1         | 1.3                      | 10                  | >gb AAB88876.1  putative auxin-repressed protein [Prunus armeniaca]                                                                                                                                                                                                                                                                                                                                                          | 133   | 1E-15   |
|                       |                 |                     |                          |                     | >gb ABA40468.1  Drm3-like protein [Solanum tuberosum]                                                                                                                                                                                                                                                                                                                                                                        | 128   | 2E-15   |
|                       |                 |                     |                          |                     | >ref NP_849820.1  unknown protein [Arabidopsis thaliana]gb AAG50916.1  unknown protein [Arabidopsis thaliana]                                                                                                                                                                                                                                                                                                                | 140   | 4E-14   |
|                       |                 |                     |                          |                     | >ref NP_564714.1  unknown protein [Arabidopsis thaliana]gb AAM64319.1  putative auxin-repressed protein [Arabidopsis thaliana]                                                                                                                                                                                                                                                                                               | 137   | 9E-14   |
|                       |                 |                     |                          |                     | >gb AAM62422.1  Drm4 [Pisum sativum]                                                                                                                                                                                                                                                                                                                                                                                         | 129   | 2E-13   |
| BM341452              | 8.85E-03        | Mo17<B73=F1         | 3.58                     | 10                  | >emb CAA73067.1  serine/threonine kinase [Sorghum bicolor]                                                                                                                                                                                                                                                                                                                                                                   | 440   | 3E-10   |
|                       |                 |                     |                          |                     | >gb ABA91407.1  serine/threonine kinase SNFL1, putative [Oryza sativa (japonica cultivar-group)]                                                                                                                                                                                                                                                                                                                             | 454   | 3E-10   |
|                       |                 |                     |                          |                     | >gb ABA95717.1  serine/threonine kinase SNFL1, putative [Oryza sativa (japonica cultivar-group)]                                                                                                                                                                                                                                                                                                                             | 419   | 3E-10   |
|                       |                 |                     |                          |                     | >gb ABA95716.1  serine/threonine kinase SNFL1, putative [Oryza sativa (japonica cultivar-group)]                                                                                                                                                                                                                                                                                                                             | 338   | 3E-10   |
|                       |                 |                     |                          |                     | >emb CAA73068.1  serine/threonine kinase [Sorghum bicolor]                                                                                                                                                                                                                                                                                                                                                                   | 440   | 2E-9    |
| BM080538              | 8.85E-03        | Mo17<B73=F1         | 1.37                     | 10                  | >dbj BAD87070.1  putative lipid transfer protein [Oryza sativa (japonica cultivar-group)] dbj BAD73499.1  putative lipid transfer protein [Oryza sativa (japonica cultivar-group)]                                                                                                                                                                                                                                           | 120   | 5E-36   |
|                       |                 |                     |                          |                     | >ref NP_915262.1  putative lipid transfer protein [Oryza sativa (japonica cultivar-group)]                                                                                                                                                                                                                                                                                                                                   | 122   | 7E-35   |
|                       |                 |                     |                          |                     | >emb CAH69211.1  type 1 non specific lipid transfer protein precursor [Triticumaestivum] emb CAH69198.1  type 1 non specific lipid transfer protein precursor [Triticum aestivum]                                                                                                                                                                                                                                            | 120   | 4E-33   |
|                       |                 |                     |                          |                     | >emb CAH69197.1  type 1 non specific lipid transfer protein precursor [Triticumaestivum]                                                                                                                                                                                                                                                                                                                                     | 121   | 4E-33   |
|                       |                 |                     |                          |                     | >emb CAH69196.1  type 1 non specific lipid transfer protein precursor [Triticumaestivum]                                                                                                                                                                                                                                                                                                                                     | 120   | 4E-33   |
| DV621347              | 8.86E-03        | B73<Mo17            | 1.29                     | 3                   | >ref XP_480940.1  unknown protein [Oryza sativa (japonica cultivar-group)]dbj BAD05448.1  unknown protein [Oryza sativa (japonica cultivar-group)]                                                                                                                                                                                                                                                                           | 641   | 3E-71   |
|                       |                 |                     |                          |                     | dbj BAD05644.1  unknown protein [Oryza sativa (japonica cultivar-group)]                                                                                                                                                                                                                                                                                                                                                     |       |         |
|                       |                 |                     |                          |                     | >gb AAV85688.1  At5g57460 [Arabidopsis thaliana]ref NP_200555.1  unknown protein [Arabidopsis thaliana] gb AAS49053.1  At5g57460 [Arabidopsis thaliana]                                                                                                                                                                                                                                                                      |       |         |
|                       |                 |                     |                          |                     | dbj BAB08782.1  unnamed protein product [Arabidopsis thaliana]                                                                                                                                                                                                                                                                                                                                                               | 646   | 8E-41   |
| CB886607              | 8.87E-03        | B73<F1=Mo17         | 1.21                     | 2                   | >dbj BAB69069.1  UDP-glucose pyrophosphorylase [Oryza sativa (japonica cultivar-group)]                                                                                                                                                                                                                                                                                                                                      | 469   | 2E-69   |
|                       |                 |                     |                          |                     | >gb AAO48422.1  UDP-glucose pyrophosphorylase [Bambusa oldhamii]                                                                                                                                                                                                                                                                                                                                                             | 473   | 5E-69   |
|                       |                 |                     |                          |                     | >emb CAA62689.1  UDP-glucose pyrophosphorylase [Hordeum vulgare subsp. vulgare]sp Q43772 UGPA_HORVU UTP--glucose-1-phosphate uridylyltransferase (UDP-glucose pyrophosphorylase) (UDPGP) (UGPase)                                                                                                                                                                                                                            | 473   | 6E-69   |
|                       |                 |                     |                          |                     | >gb AAF19422.1  UDP-glucose pyrophosphorylase [Musa acuminata]sp Q9SDX3 UGPA_MUSAC UTP--glucose-1-phosphate uridylyltransferase (UDP-glucose pyrophosphorylase) (UDPGP) (UGPase)                                                                                                                                                                                                                                             | 467   | 2E-66   |
|                       |                 |                     |                          |                     | >gb AAP86317.1  UDP-glucose pyrophosphorylase [Populus tremula x Populustremuloides]                                                                                                                                                                                                                                                                                                                                         | 470   | 2E-64   |
| CB605443              | 8.87E-03        | B73<F1=Mo17         | 1.28                     | 3                   | >ref XP_464508.1  26S proteasome regulatory particle triple-A ATPase subunit4 [Oryzasativa (japonica cultivar-group)] dbj BAD25481.1  26S proteasome regulatory particle triple-A ATPase subunit4 [Oryza sativa (japonica cultivar-group)] dbj BAD15843.1  26S proteasome regulatory particle triple-A ATPase subunit4 [Oryza sativa (japonica cultivar-group)]                                                              | 400   | 9E-44   |
|                       |                 |                     |                          |                     | >dbj BAD36121.1  putative 26S proteasome regulatory particle triple-A ATPase subunit4 [Oryza sativa (japonica cultivar-group)] dbj BAD35613.1  putative 26S proteasome regulatory particle triple-A ATPase subunit4 [Oryza sativa (japonica cultivar-group)]                                                                                                                                                                 | 401   | 4E-39   |
|                       |                 |                     |                          |                     | >ref NP_175120.1  ATP binding / ATPase/ hydrolase/ nucleoside-triphosphatase/nucleotide binding [Arabidopsis thaliana] gb AAM47992.1  26S proteasome AAA-ATPase subunit RPT4a-like protein [Arabidopsis thaliana] gb AAL32787.1  similar to 26S proteasome AAA-ATPase subunit RPT4a [Arabidopsis thaliana]                                                                                                                   |       |         |
|                       |                 |                     |                          |                     | gb AAF69154.1  F27F5.8 [Arabidopsis thaliana]                                                                                                                                                                                                                                                                                                                                                                                | 399   | 7E-38   |
|                       |                 |                     |                          |                     | >gb ABA40428.1  26S proteasome AAA-ATPase subunit RPT4a-like protein [Solanum tuberosum] dbj BAC23035.1  26S proteasome AAA-ATPase subunit RPT4a [Solanum tuberosum]                                                                                                                                                                                                                                                         | 398   | 2E-36   |
|                       |                 |                     |                          |                     | >ref NP_199115.1  RPT4A: ATPase [Arabidopsis thaliana]gb AAL7774.1  AT5g43010/MBD2_21 [Arabidopsis thaliana] gb AAK50085.1  AT5g43010/MBD2_21 [Arabidopsis thaliana] dbj BAB09203.1  26S proteasome AAA-ATPase subunit RPT4a [Arabidopsis thaliana] gb AAF22524.1  26S proteasome AAA-ATPase subunit RPT4a [Arabidopsis thaliana]                                                                                            | 399   | 3E-36   |
| DV489995              | 8.91E-03        | Mo17<B73=F1         | 1.32                     | 10                  | >ref XP_450589.1  putative protein-arginine N-methyltransferase [Oryza sativa(japonica cultivar-group)] dbj BAD23315.1  putative protein-arginine N-methyltransferase [Oryza sativa (japonica cultivar-group)]                                                                                                                                                                                                               | 306   | 8E-70   |
|                       |                 |                     |                          |                     | >ref NP_194680.1  S-adenosylmethionine-dependent methyltransferase/ protein-arginineN-methyltransferase [Arabidopsis thaliana] emb CAB79709.1  arginine methyltransferase (pam1) [Arabidopsis thaliana] emb CAB45311.1  arginine methyltransferase (pam1) [Arabidopsis thaliana] gb AAN12952.1  arginine methyltransferase pam1 [Arabidopsis thaliana] gb AAM65371.1  arginine methyltransferase pam1 [Arabidopsis thaliana] | 390   | 8E-62   |

**Table 4. Microarray analysis results, mode of gene action classification, and BLAST annotation for the 1,367 ESTs identified as differentially expressed among genotypes (15% FDR)**

| GenBank accession no. | Overall P value | Significant pattern | Fold change <sup>†</sup> | Sector <sup>‡</sup> | BLAST annotation*                                                                                                                                                                                                                                                                                                                                                                                                                                                                                                                                                                                                                                                                                                                                                                                                                                                                                                                                                                                                                                                                                                            | Score | E value |
|-----------------------|-----------------|---------------------|--------------------------|---------------------|------------------------------------------------------------------------------------------------------------------------------------------------------------------------------------------------------------------------------------------------------------------------------------------------------------------------------------------------------------------------------------------------------------------------------------------------------------------------------------------------------------------------------------------------------------------------------------------------------------------------------------------------------------------------------------------------------------------------------------------------------------------------------------------------------------------------------------------------------------------------------------------------------------------------------------------------------------------------------------------------------------------------------------------------------------------------------------------------------------------------------|-------|---------|
|                       |                 |                     |                          |                     | >gb AAL36326.1  putative arginine methyltransferase pam1 [Arabidopsis thaliana]                                                                                                                                                                                                                                                                                                                                                                                                                                                                                                                                                                                                                                                                                                                                                                                                                                                                                                                                                                                                                                              | 390   | 5E-61   |
|                       |                 |                     |                          |                     | >ref NP_179557.1  S-adenosylmethionine-dependent methyltransferase/ protein-arginineN-methyltransferase [Arabidopsis thaliana] gb AAC62148.1  putative arginine N-methyltransferase [Arabidopsis thaliana] gb AAP21299.1  At2g19670 [Arabidopsis thaliana]                                                                                                                                                                                                                                                                                                                                                                                                                                                                                                                                                                                                                                                                                                                                                                                                                                                                   | 366   | 2E-60   |
|                       |                 |                     |                          |                     | >emb CAA07570.1  arginine methyltransferase [Arabidopsis thaliana]                                                                                                                                                                                                                                                                                                                                                                                                                                                                                                                                                                                                                                                                                                                                                                                                                                                                                                                                                                                                                                                           | 376   | 1E-55   |
| CAB29361              | 8.91E-03        | B73=F1<Mo17         | 1.58                     | 4                   | >emb CAA68422.1  ribosomal protein L22 (AA 1-126) [Zea mays]                                                                                                                                                                                                                                                                                                                                                                                                                                                                                                                                                                                                                                                                                                                                                                                                                                                                                                                                                                                                                                                                 | 126   | 1E-40   |
|                       |                 |                     |                          |                     | >gb AAT44634.1  ribosomal protein L22 [Saccharum hybrid cultivar SP-80-3280]emb CAA60325.1  ribosomal protein L22 [Zea mays] dbj BAD27332.1  ribosomal protein L22 [Saccharum officinarum] ref YP_054669.1  ribosomal protein L22 [Saccharum officinarum] ref NP_043063.1  ribosomal protein L22 [Zea mays] sp P06589 RK22_MAIZE Chloroplast 50S ribosomal protein L22 ref YP_024319.1  ribosomal protein L22 [Saccharum hybrid cultivar SP-80-3280] sp Q6L3F9 RK22_SACHY Chloroplast 50S ribosomal protein L22 sp Q6ENS4 RK22_SACOF Chloroplast 50S ribosomal protein L22                                                                                                                                                                                                                                                                                                                                                                                                                                                                                                                                                   | 148   | 1E-40   |
|                       |                 |                     |                          |                     | >ref XP_481016.1  ribosomal protein L22 [Oryza sativa (japonica cultivar-group)]ref XP_479425.1  Chloroplast 50S ribosomal protein L22 [Oryza sativa (japonica cultivar-group)] gb AAS46148.1  ribosomal protein L22; rpl22 [Oryza sativa (japonica cultivar-group)] gb AAS46211.1  ribosomal protein L22; grp122 [Oryza sativa (japonica cultivar-group)] gb AAS46083.1  ribosomal protein L22; rpl22 [Oryza sativa (indica cultivar-group)] emb CAA33935.1  ribosomal protein L22 [Oryza sativa (japonica cultivar-group)] dbj BAD31430.1  Chloroplast 50S ribosomal protein L22 [Oryza sativa (japonica cultivar-group)] dbj BAD05515.1  ribosomal protein L22 [Oryza sativa (japonica cultivar-group)] dbj BAC10088.1  Chloroplast 50S ribosomal protein L22 [Oryza sativa (japonica cultivar-group)] dbj BAD26818.1  ribosomal protein L22 [Oryza nivara] dbj BAD36258.1  ribosomal protein L22 [Oryza sativa (japonica cultivar-group)] dbj BAD33781.1  ribosomal protein L22 [Oryza sativa (japonica cultivar-group)] ref NP_039425.1  ribosomal protein L22 [Oryza sativa (japonica cultivar-group)] ref YP_052789.1 | 149   | 9E-39   |
|                       |                 |                     |                          |                     | >ref NP_114297.1  ribosomal protein L22 [Triticum aestivum]sp Q95H48 RK22_WHEAT Chloroplast 50S ribosomal protein L22 dbj BAB47073.1  ribosomal protein L22 [Triticum aestivum]                                                                                                                                                                                                                                                                                                                                                                                                                                                                                                                                                                                                                                                                                                                                                                                                                                                                                                                                              | 148   | 2E-37   |
|                       |                 |                     |                          |                     | >gb AAT44676.1  ribosomal protein S19 [Saccharum hybrid cultivar SP-80-3280]gb AAT44635.1  ribosomal protein S19 [Saccharum hybrid cultivar SP-80-3280] emb CAC35460.1  ribosomal protein S19 [Zea mays] emb CAA60374.1  ribosomal protein S19 [Zea mays] emb CAA60326.1  ribosomal protein S19 [Zea mays] dbj BAD27387.1  ribosomal protein S19 [Saccharum officinarum] dbj BAD27333.1  ribosomal protein S19 [Saccharum officinarum] ref YP_054723.1  ribosomal protein S19 [Saccharum officinarum] ref YP_054670.1  ribosomal protein S19 [Saccharum officinarum] ref NP_043113.1  ribosomal protein S19 [Zea mays] ref NP_043064.1  ribosomal protein S19 [Zea mays] sp P06588 RR19_MAIZE Chloroplast 30S ribosomal protein S19 ref YP_024362.1  ribosomal protein S19 [Saccharum hybrid cultivar SP-80-3280] ref YP_024320.1  ribosomal protein S19 [Saccharum hybrid cultivar SP-80-3280] sp Q6L3B6 RR19_SACHY Chloroplast 30S ribosomal protein S19 sp Q6ENS3 RR19_SACOF Chloroplast 30S ribosomal protein S19                                                                                                        | 93    | 2E-34   |
| CB833930              | 8.93E-03        | B73=F1<Mo17         | 1.31                     | 4                   | >ref XP_474231.1  OSJNba0084K01.15 [Oryza sativa (japonica cultivar-group)]emb CAE04843.2  OSJNba0084K01.15 [Oryza sativa (japonica cultivar-group)]                                                                                                                                                                                                                                                                                                                                                                                                                                                                                                                                                                                                                                                                                                                                                                                                                                                                                                                                                                         | 451   | 1E-28   |
|                       |                 |                     |                          |                     | >gb AAO14624.1  hypothetical protein [Prunus persica]                                                                                                                                                                                                                                                                                                                                                                                                                                                                                                                                                                                                                                                                                                                                                                                                                                                                                                                                                                                                                                                                        | 446   | 4E-14   |
|                       |                 |                     |                          |                     | >ref NP_564096.1  nucleic acid binding [Arabidopsis thaliana]dbj BAD95060.1  hypothetical protein [Arabidopsis thaliana]                                                                                                                                                                                                                                                                                                                                                                                                                                                                                                                                                                                                                                                                                                                                                                                                                                                                                                                                                                                                     | 413   | 3E-13   |
|                       |                 |                     |                          |                     | >gb AAG12545.1  Hypothetical Protein [Arabidopsis thaliana]                                                                                                                                                                                                                                                                                                                                                                                                                                                                                                                                                                                                                                                                                                                                                                                                                                                                                                                                                                                                                                                                  | 420   | 3E-13   |
|                       |                 |                     |                          |                     | >ref NP_201428.1  nucleic acid binding [Arabidopsis thaliana]gb AAO50704.1  unknown protein [Arabidopsis thaliana] dbj BAB10706.1  unnamed protein product [Arabidopsis thaliana] dbj BAC42293.1  unknown protein [Arabidopsis thaliana]                                                                                                                                                                                                                                                                                                                                                                                                                                                                                                                                                                                                                                                                                                                                                                                                                                                                                     | 449   | 3E-6    |
| DV622152              | 8.94E-03        | B73=F1<Mo17         | 1.2                      | 5                   | >dbj BAD46209.1  putative inosine-uridine nucleoside N-ribohydrolase [Oryza sativa(japonica cultivar-group)]                                                                                                                                                                                                                                                                                                                                                                                                                                                                                                                                                                                                                                                                                                                                                                                                                                                                                                                                                                                                                 | 337   | 7E-83   |
|                       |                 |                     |                          |                     | >ref XP_483754.1  putative inosine-uridine nucleoside N-ribohydrolase [Oryza sativa(japonica cultivar-group)] dbj BAD09089.1  putative inosine-uridine nucleoside N-ribohydrolase [Oryza sativa (japonica cultivar-group)]                                                                                                                                                                                                                                                                                                                                                                                                                                                                                                                                                                                                                                                                                                                                                                                                                                                                                                   | 324   | 1E-76   |
|                       |                 |                     |                          |                     | >gb AAT00629.1  putative inosine-uridine preferring nucleoside hydrolase [Zea mays]                                                                                                                                                                                                                                                                                                                                                                                                                                                                                                                                                                                                                                                                                                                                                                                                                                                                                                                                                                                                                                          | 325   | 1E-73   |
|                       |                 |                     |                          |                     | >ref NP_565843.1  hydrolase [Arabidopsis thaliana]gb AAD21435.2  expressed protein [Arabidopsis thaliana] gb AAL47407.1  At2g36310/F2H17.8 [Arabidopsis thaliana] gb AAL06843.1  At2g36310/F2H17.8 [Arabidopsis thaliana] gb AAM63615.1  unknown [Arabidopsis thaliana]                                                                                                                                                                                                                                                                                                                                                                                                                                                                                                                                                                                                                                                                                                                                                                                                                                                      | 336   | 3E-66   |
|                       |                 |                     |                          |                     | >ref XP_468759.1  putative inosine-uridine preferring nucleoside hydrolase [Oryzasativa (japonica cultivar-group)] gb AAP20832.1  putative inosine-uridine preferring nucleoside hydrolase [Oryza sativa (japonica cultivar-group)]                                                                                                                                                                                                                                                                                                                                                                                                                                                                                                                                                                                                                                                                                                                                                                                                                                                                                          | 322   | 2E-38   |
| CB833952              | 8.94E-03        | Mo17<F1             | 1.36                     | 12                  | >gb AAC08009.1  DnaJ-related protein ZMDJ1 [Zea mays]                                                                                                                                                                                                                                                                                                                                                                                                                                                                                                                                                                                                                                                                                                                                                                                                                                                                                                                                                                                                                                                                        | 419   | 5E-71   |
|                       |                 |                     |                          |                     | >gb AAX95135.1  DnaJ protein, putative [Oryza sativa (japonica cultivar-group)]                                                                                                                                                                                                                                                                                                                                                                                                                                                                                                                                                                                                                                                                                                                                                                                                                                                                                                                                                                                                                                              | 416   | 6E-71   |
|                       |                 |                     |                          |                     | >gb AAU89194.1  DnaJ protein, putative [Oryza sativa (japonica cultivar-group)]gb AAO72551.1  DNAJ-like protein [Oryza sativa (japonica cultivar-group)]                                                                                                                                                                                                                                                                                                                                                                                                                                                                                                                                                                                                                                                                                                                                                                                                                                                                                                                                                                     | 417   | 6E-71   |
|                       |                 |                     |                          |                     | >gb AAT75262.1  putative DnaJ like protein [Oryza sativa (japonicacultivar-group)]                                                                                                                                                                                                                                                                                                                                                                                                                                                                                                                                                                                                                                                                                                                                                                                                                                                                                                                                                                                                                                           | 417   | 9E-65   |
|                       |                 |                     |                          |                     | >sp P43644 DNJH_ATRNU DnaJ protein homolog ANJ1                                                                                                                                                                                                                                                                                                                                                                                                                                                                                                                                                                                                                                                                                                                                                                                                                                                                                                                                                                                                                                                                              | 417   | 1E-64   |
| CB816061              | 8.98E-03        | Mo17<B73=F1         | 1.25                     | 10                  | >gb AAC08009.1  DnaJ-related protein ZMDJ1 [Zea mays]                                                                                                                                                                                                                                                                                                                                                                                                                                                                                                                                                                                                                                                                                                                                                                                                                                                                                                                                                                                                                                                                        | 419   | 5E-35   |
|                       |                 |                     |                          |                     | >gb AAX95135.1  DnaJ protein, putative [Oryza sativa (japonica cultivar-group)]                                                                                                                                                                                                                                                                                                                                                                                                                                                                                                                                                                                                                                                                                                                                                                                                                                                                                                                                                                                                                                              | 416   | 8E-31   |
|                       |                 |                     |                          |                     | >gb AAU89194.1  DnaJ protein, putative [Oryza sativa (japonica cultivar-group)]gb AAO72551.1  DNAJ-like protein [Oryza sativa (japonica cultivar-group)]                                                                                                                                                                                                                                                                                                                                                                                                                                                                                                                                                                                                                                                                                                                                                                                                                                                                                                                                                                     | 417   | 8E-31   |
|                       |                 |                     |                          |                     | >dbj BAA35121.1  DnaJ homolog [Salix gilgiana]                                                                                                                                                                                                                                                                                                                                                                                                                                                                                                                                                                                                                                                                                                                                                                                                                                                                                                                                                                                                                                                                               | 420   | 2E-26   |
|                       |                 |                     |                          |                     | >gb AAG24643.1  J2P [Daucus carota]gb AAG24642.1  J1P [Daucus carota]                                                                                                                                                                                                                                                                                                                                                                                                                                                                                                                                                                                                                                                                                                                                                                                                                                                                                                                                                                                                                                                        | 418   | 6E-26   |
| BM079379              | 8.99E-03        | Mo17<B73            | 2.6                      | 10                  | ns                                                                                                                                                                                                                                                                                                                                                                                                                                                                                                                                                                                                                                                                                                                                                                                                                                                                                                                                                                                                                                                                                                                           |       |         |
| Al629488              | 9.01E-03        | B73<F1=Mo17         | 2.26                     | 3                   | ns                                                                                                                                                                                                                                                                                                                                                                                                                                                                                                                                                                                                                                                                                                                                                                                                                                                                                                                                                                                                                                                                                                                           |       |         |
| BM336484              | 9.03E-03        | Mo17<B73=F1         | 1.34                     | 11                  | >gb AAT12488.1  copper chaperone [Populus alba x Populus tremula var. glandulosa]                                                                                                                                                                                                                                                                                                                                                                                                                                                                                                                                                                                                                                                                                                                                                                                                                                                                                                                                                                                                                                            | 85    | 1E-31   |

**Table 4. Microarray analysis results, mode of gene action classification, and BLAST annotation for the 1,367 ESTs identified as differentially expressed among genotypes (15% FDR)**

| GenBank accession no. | Overall P value | Significant pattern | Fold change <sup>†</sup> | Sector <sup>‡</sup> | BLAST annotation*                                                                                                                                                                                                                                                                                                                                                               | Score | E value |
|-----------------------|-----------------|---------------------|--------------------------|---------------------|---------------------------------------------------------------------------------------------------------------------------------------------------------------------------------------------------------------------------------------------------------------------------------------------------------------------------------------------------------------------------------|-------|---------|
|                       |                 |                     |                          |                     | >ref NP_564870.1  metal ion binding [Arabidopsis thaliana]gb AAL76156.1  At1g66240/T6J19_6 [Arabidopsis thaliana] gb AAK64002.1  At1g66240/T6J19_6 [Arabidopsis thaliana]                                                                                                                                                                                                       | 106   | 1E-30   |
|                       |                 |                     |                          |                     | >ref XP_480605.1  putative copper chaperone [Oryza sativa (japonica cultivar-group)]dbj BAD11546.1  putative copper chaperone [Oryza sativa (japonica cultivar-group)] dbj BAD05334.1  putative copper chaperone [Oryza sativa (japonica cultivar-group)]                                                                                                                       | 81    | 2E-30   |
|                       |                 |                     |                          |                     | >gb AAP06757.1  copper chaperone [Lycopersicon esculentum]                                                                                                                                                                                                                                                                                                                      | 81    | 2E-28   |
|                       |                 |                     |                          |                     | >ref NP_191183.1  CCH [Arabidopsis thaliana]emb CAB87423.1  copper homeostasis factor [Arabidopsis thaliana] gb AAK32872.1  AT3g56240/F18O21_200 [Arabidopsis thaliana] gb AAL47423.1  AT3g56240/F18O21_200 [Arabidopsis thaliana] gb AAM62878.1  copper homeostasis factor [Arabidopsis thaliana] gb AAC33510.1  copper homeostasis factor [Arabidopsis thaliana]              | 121   | 4E-28   |
| DV550016              | 9.08E-03        | Mo17<B73=F1         | 1.57                     | 10                  | >gb AAU44176.1  unknown protein [Oryza sativa (japonica cultivar-group)]                                                                                                                                                                                                                                                                                                        | 230   | 1E-45   |
|                       |                 |                     |                          |                     | >ref NP_849977.1  heat shock protein binding / unfolded protein binding [Arabidopsis thaliana] gb AAM97127.1  unknown protein [Arabidopsis thaliana] gb AAN65042.1  unknown protein [Arabidopsis thaliana]                                                                                                                                                                      | 268   | 3E-21   |
|                       |                 |                     |                          |                     | >ref XP_474436.1  OSJNBa0070M12.14 [Oryza sativa (japonica cultivar-group)]emb CAD41937.2  OSJNBa0070M12.14 [Oryza sativa (japonica cultivar-group)]                                                                                                                                                                                                                            | 274   | 2E-17   |
|                       |                 |                     |                          |                     | >ref NP_181738.1  heat shock protein binding / unfolded protein binding [Arabidopsis thaliana] gb AAM97104.1  unknown protein [Arabidopsis thaliana] gb AAB63536.1  unknown protein [Arabidopsis thaliana] gb AAN72139.1  unknown protein [Arabidopsis thaliana]                                                                                                                | 263   | 2E-11   |
|                       |                 |                     |                          |                     | >gb AAL87325.1  unknown protein [Arabidopsis thaliana]                                                                                                                                                                                                                                                                                                                          | 254   | 6E-11   |
| CD670384              | 9.10E-03        | Mo17<B73=F1         | 1.34                     | 10                  | >sp Q08069 RS8 MAIZE 40S ribosomal protein S8gb AAB06330.1  ribosomal protein S8                                                                                                                                                                                                                                                                                                | 221   | 7E-82   |
|                       |                 |                     |                          |                     | >emb CAE05511.1  OSJNBa0038P21.4 [Oryza sativa (japonica cultivar-group)]                                                                                                                                                                                                                                                                                                       | 221   | 1E-75   |
|                       |                 |                     |                          |                     | >ref XP_465742.1  putative 40S ribosomal protein S8 [Oryza sativa (japonica cultivar-group)] ref XP_506804.1  PREDICTED P0483C08.42 gene product [Oryza sativa (japonica cultivar-group)] dbj BAD21871.1  putative 40S ribosomal protein S8 [Oryza sativa (japonica cultivar-group)] dbj BAD21876.1  putative 40S ribosomal protein S8 [Oryza sativa (japonica cultivar-group)] | 220   | 4E-75   |
|                       |                 |                     |                          |                     | >sp P49199 RS8 ORYSA 40S ribosomal protein S8dbj BAA07207.1  ribosomal protein S8 [Oryza sativa (japonica cultivar-group)]                                                                                                                                                                                                                                                      | 220   | 5E-72   |
|                       |                 |                     |                          |                     | >gb ABA46755.1  unknown [Solanum tuberosum]                                                                                                                                                                                                                                                                                                                                     | 224   | 4E-71   |
| CA998707              | 9.16E-03        | Mo17<B73=F1         | 1.3                      | 10                  | >gb AAO00695.1  hypothetical protein OSJNBa0096G08.1 [Oryza sativa (japonica cultivar-group)]                                                                                                                                                                                                                                                                                   | 114   | 3E-16   |
|                       |                 |                     |                          |                     | >ref NP_922396.1  hypothetical protein [Oryza sativa (japonica cultivar-group)]gb AAM92300.1  hypothetical protein [Oryza sativa (japonica cultivar-group)]                                                                                                                                                                                                                     | 289   | 3E-16   |
|                       |                 |                     |                          |                     | >gb ABB47904.1  expressed protein [Oryza sativa (japonica cultivar-group)]                                                                                                                                                                                                                                                                                                      | 291   | 3E-16   |
|                       |                 |                     |                          |                     | >dbj BAD44327.1  unknown protein [Arabidopsis thaliana]dbj BAD43126.1  unknown protein [Arabidopsis thaliana]                                                                                                                                                                                                                                                                   | 185   | 1E-6    |
|                       |                 |                     |                          |                     | >ref NP_200024.1  unknown protein [Arabidopsis thaliana]ref NP_001032060.1  unknown protein [Arabidopsis thaliana] dbj BAB11059.1  unnamed protein product [Arabidopsis thaliana]                                                                                                                                                                                               | 275   | 1E-6    |
| BM075631              | 9.27E-03        | F1=Mo17<B73         | 1.49                     | 9                   | >ref XP_473516.1  OSJNBa0017B10.7 [Oryza sativa (japonica cultivar-group)]emb CAE03092.2  OSJNBa0017B10.7 [Oryza sativa (japonica cultivar-group)]                                                                                                                                                                                                                              | 852   | 3E-29   |
|                       |                 |                     |                          |                     | >ref NP_195281.1  unknown protein [Arabidopsis thaliana]emb CAB80272.1  hypothetical protein [Arabidopsis thaliana] emb CAA20026.1  hypothetical protein [Arabidopsis thaliana]                                                                                                                                                                                                 | 917   | 7E-10   |
| BM073507              | 9.28E-03        | F1<B73=Mo17         | 1.9                      | 7                   | ns                                                                                                                                                                                                                                                                                                                                                                              |       |         |
| CB886579              | 9.29E-03        | Mo17<B73=F1         | 1.44                     | 10                  | >ref NP_922190.1  putative leaf protein [Oryza sativa (japonica cultivar-group)]gb AAM93671.1  putative leaf protein [Oryza sativa (japonica cultivar-group)]                                                                                                                                                                                                                   | 513   | 1E-28   |
|                       |                 |                     |                          |                     | gb AAP54477.1  leaf protein, putative [Oryza sativa (japonica cultivar-group)]                                                                                                                                                                                                                                                                                                  | 372   | 8E-28   |
|                       |                 |                     |                          |                     | >ref NP_922187.1  putative leaf protein [Oryza sativa (japonica cultivar-group)]gb AAM93695.1  putative leaf protein [Oryza sativa (japonica cultivar-group)]                                                                                                                                                                                                                   |       |         |
|                       |                 |                     |                          |                     | >ref NP_922189.1  putative leaf protein [Oryza sativa (japonica cultivar-group)]gb AAM93669.1  putative leaf protein [Oryza sativa (japonica cultivar-group)]                                                                                                                                                                                                                   | 545   | 8E-28   |
|                       |                 |                     |                          |                     | gb AAP54476.1  leaf protein, putative [Oryza sativa (japonica cultivar-group)]                                                                                                                                                                                                                                                                                                  | 341   | 8E-28   |
|                       |                 |                     |                          |                     | >gb ABB47839.1  leaf protein, putative [Oryza sativa (japonica cultivar-group)]                                                                                                                                                                                                                                                                                                 |       |         |
|                       |                 |                     |                          |                     | >ref NP_179663.1  unknown protein [Arabidopsis thaliana]gb AAT99801.1  At2g20710 [Arabidopsis thaliana] gb AAD20924.1  hypothetical protein [Arabidopsis thaliana]                                                                                                                                                                                                              | 490   | 1E-6    |
| CD001612              | 9.33E-03        | Mo17<B73=F1         | 1.39                     | 11                  | >sp P23346 SODC5 MAIZE Superoxide dismutase [Cu-Zn] 4AP                                                                                                                                                                                                                                                                                                                         | 152   | 1E-84   |
|                       |                 |                     |                          |                     | >emb CAB57992.1  superoxide dismutase-4AP [Zea mays]sp P23345 SODC4 MAIZE Superoxide dismutase [Cu-Zn] 4A                                                                                                                                                                                                                                                                       | 152   | 9E-84   |
|                       |                 |                     |                          |                     | >emb CAB57993.1  superoxide dismutase-4A [Zea mays]gb AAB49913.1  superoxide dismutase 4A                                                                                                                                                                                                                                                                                       | 152   | 1E-82   |
|                       |                 |                     |                          |                     | >sp P28757 SODC2_ORYSA Superoxide dismutase [Cu-Zn] 2gb AAC14465.1  cytosolic copper/zinc-superoxide dismutase [Oryza sativa] dbj BAA00800.1  copper/zinc-superoxide dismutase [Oryza sativa (japonica cultivar-group)]                                                                                                                                                         | 152   | 2E-78   |
|                       |                 |                     |                          |                     | >gb AAY56345.1  cytoplasmic copper/zinc-superoxide dismutase [Oryza sativa (indicacultivar-group)] sp P28756 SODC1_ORYSA Superoxide dismutase [Cu-Zn] 1 gb AAC14464.1  cytosolic copper/zinc-superoxide dismutase [Oryza sativa] dbj BAA00799.1  copper/zinc-superoxide dismutase [Oryza sativa (japonica cultivar-group)] prf 211424A Cu/Zn superoxide dismutase               | 152   | 2E-77   |
| DV494176              | 9.34E-03        | Mo17<F1             | 1.41                     | 11                  | >ref NP_911778.1  myosin-like protein [Oryza sativa (japonica cultivar-group)]dbj BAC57340.1  myosin-like protein [Oryza sativa (japonica cultivar-group)]                                                                                                                                                                                                                      | 309   | 2E-28   |
|                       |                 |                     |                          |                     | >ref XP_470354.1  myosin-like protein [Oryza sativa (japonica cultivar-group)]gb AAO41145.1  myosin-like protein [Oryza sativa (japonica cultivar-group)]                                                                                                                                                                                                                       | 216   | 1E-26   |
|                       |                 |                     |                          |                     | >ref XP_477099.1  myosin-like protein [Oryza sativa (japonica cultivar-group)]dbj BAC82964.1  myosin-like protein [Oryza sativa (japonica cultivar-group)]                                                                                                                                                                                                                      | 383   | 3E-15   |
|                       |                 |                     |                          |                     | dbj BAC57288.1  myosin-like protein [Oryza sativa (japonica cultivar-group)]                                                                                                                                                                                                                                                                                                    | 212   | 4E-12   |
|                       |                 |                     |                          |                     | >ref NP_973593.1  unknown protein [Arabidopsis thaliana]                                                                                                                                                                                                                                                                                                                        |       |         |

**Table 4. Microarray analysis results, mode of gene action classification, and BLAST annotation for the 1,367 ESTs identified as differentially expressed among genotypes (15% FDR)**

| GenBank accession no. | Overall P value | Significant pattern | Fold change <sup>†</sup> | Sector <sup>‡</sup> | BLAST annotation*                                                                                                                                                                                                                                                                                                                                                                                                                                                                                                                                                   | Score | E value |
|-----------------------|-----------------|---------------------|--------------------------|---------------------|---------------------------------------------------------------------------------------------------------------------------------------------------------------------------------------------------------------------------------------------------------------------------------------------------------------------------------------------------------------------------------------------------------------------------------------------------------------------------------------------------------------------------------------------------------------------|-------|---------|
| CB331806              | 9.35E-03        | Mo17<B73            | 1.26                     | 10                  | >ref XP_473801.1  OSJNBb0015N08.13 [Oryza sativa (japonica cultivar-group)]emb CAE03885.2  OSJNBb0015N08.13 [Oryza sativa (japonica cultivar-group)]                                                                                                                                                                                                                                                                                                                                                                                                                | 250   | 3E-67   |
|                       |                 |                     |                          |                     | >ref XP_480842.1  putative 60S ribosomal protein L7 [Oryza sativa (japonica cultivar-group)] dbj BAD03800.1  putative 60S ribosomal protein L7 [Oryza sativa (japonica cultivar-group)]                                                                                                                                                                                                                                                                                                                                                                             | 245   | 3E-66   |
|                       |                 |                     |                          |                     | >gb AAW50989.1  ribosomal protein L7 [Triticum aestivum]                                                                                                                                                                                                                                                                                                                                                                                                                                                                                                            | 244   | 2E-60   |
|                       |                 |                     |                          |                     | >ref NP_974305.1  structural constituent of ribosome / transcription regulator [Arabidopsis thaliana] ref NP_187967.1  structural constituent of ribosome / transcription regulator [Arabidopsis thaliana] gb AAL76153.1  AT3g13580/K20M4_2 [Arabidopsis thaliana] gb AAL06999.1  AT3g13580/K20M4_2 [Arabidopsis thaliana] gb AAK64004.1  AT3g13580/K20M4_2 [Arabidopsis thaliana] dbj BAB02600.1  60S ribosomal protein L7 [Arabidopsis thaliana] sp Q9LHP1 RL73 ARATH 60S ribosomal protein L7-3                                                                  | 244   | 1E-56   |
| DV622665              | 9.36E-03        | B73=F1<Mo17         | 1.18                     | 4                   | >ref NP_178234.1  structural constituent of ribosome / transcription regulator [Arabidopsis thaliana] gb AAL85059.1  putative ribosomal protein L7 [Arabidopsis thaliana] gb AAK76668.1  putative ribosomal protein L7 [Arabidopsis thaliana] gb AAD14525.1  putative ribosomal protein L7 [Arabidopsis thaliana] gb AAM10260.1  60S ribosomal protein L7 [Arabidopsis thaliana] gb AAM61692.1  putative ribosomal protein L7 [Arabidopsis thaliana] gb AAK43861.1  60S ribosomal protein L7 [Arabidopsis thaliana] sp P60040 RL71 ARATH 60S ribosomal protein L7-1 | 242   | 3E-56   |
|                       |                 |                     |                          |                     | >gb AAM67260.1  alcohol dehydrogenase-like protein [Arabidopsis thaliana]                                                                                                                                                                                                                                                                                                                                                                                                                                                                                           | 384   | 1E-54   |
|                       |                 |                     |                          |                     | >emb CAB79166.1  alcohol dehydrogenase like protein [Arabidopsis thaliana]emb CAA18114.1  alcohol dehydrogenase like protein [Arabidopsis thaliana]                                                                                                                                                                                                                                                                                                                                                                                                                 | 378   | 4E-54   |
|                       |                 |                     |                          |                     | >ref NP_567645.1  oxidoreductase/ zinc ion binding [Arabidopsis thaliana]ref NP_974589.1  oxidoreductase/ zinc ion binding [Arabidopsis thaliana]                                                                                                                                                                                                                                                                                                                                                                                                                   | 389   | 4E-54   |
| DV550879              | 9.36E-03        | B73=F1<Mo17         | 1.6                      | 4                   | >ref NP_912567.1  Putative alcohol dehydrogenase [Oryza sativa (japonica cultivar-group)] gb AAN64150.1  Putative alcohol dehydrogenase [Oryza sativa (japonica cultivar-group)]                                                                                                                                                                                                                                                                                                                                                                                    | 360   | 5E-54   |
|                       |                 |                     |                          |                     | >ref NP_914761.1  putative alcohol dehydrogenase [Oryza sativa (japonica cultivar-group)] dbj BAC10189.1  putative alcohol dehydrogenase [Oryza sativa (japonica cultivar-group)]                                                                                                                                                                                                                                                                                                                                                                                   | 390   | 2E-53   |
|                       |                 |                     |                          |                     | ns                                                                                                                                                                                                                                                                                                                                                                                                                                                                                                                                                                  |       |         |
|                       |                 |                     |                          |                     | >ref NP_912805.1  unnamed protein product [Oryza sativa (japonica cultivar-group)]dbj BAA85219.1  unnamed protein product [Oryza sativa (japonica cultivar-group)]                                                                                                                                                                                                                                                                                                                                                                                                  | 1197  | 1E-44   |
| DV491984              | 9.46E-03        | Mo17<B73            | 1.5                      | 9                   | >dbj BAB07978.1  putative glycine-rich protein 2 [Oryza sativa (japonica cultivar-group)] sp Q9LGE6 LSM4_ORYSA Probable U6 snRNA-associated Sm-like protein LSM4                                                                                                                                                                                                                                                                                                                                                                                                    | 147   | 1E-44   |
|                       |                 |                     |                          |                     | >gb ABB02633.1  glycine rich protein-like [Solanum tuberosum]gb ABB87115.1  glycine rich protein-like [Solanum tuberosum]                                                                                                                                                                                                                                                                                                                                                                                                                                           | 147   | 5E-42   |
|                       |                 |                     |                          |                     | >gb AAM65462.1  glycine rich protein-like [Arabidopsis thaliana]                                                                                                                                                                                                                                                                                                                                                                                                                                                                                                    | 129   | 2E-41   |
|                       |                 |                     |                          |                     | >ref NP_198124.1  EMB1644 [Arabidopsis thaliana]                                                                                                                                                                                                                                                                                                                                                                                                                                                                                                                    | 129   | 2E-41   |
| BM073198              | 9.46E-03        | F1=Mo17<B73         | 1.89                     | 9                   | ns                                                                                                                                                                                                                                                                                                                                                                                                                                                                                                                                                                  |       |         |
| CD484517              | 9.52E-03        | Mo17<B73=F1         | 2.35                     | 11                  | >ref XP_794816.1  PREDICTED: similar to H3 histone, family 2 isoform 2 [Strongylocentrotus purpuratus]                                                                                                                                                                                                                                                                                                                                                                                                                                                              | 145   | 1E-28   |
|                       |                 |                     |                          |                     | >emb CAF98785.1  unnamed protein product [Tetraodon nigroviridis]                                                                                                                                                                                                                                                                                                                                                                                                                                                                                                   | 188   | 4E-28   |
|                       |                 |                     |                          |                     | >ref XP_854287.1  PREDICTED: similar to histone 1, H2ai (predicted) [Canis familiaris]                                                                                                                                                                                                                                                                                                                                                                                                                                                                              | 156   | 4E-28   |
|                       |                 |                     |                          |                     | >gb AAV65112.1  histone 3 [Camellia sinensis]                                                                                                                                                                                                                                                                                                                                                                                                                                                                                                                       | 136   | 5E-28   |
| CD568461              | 9.56E-03        | B73=F1<Mo17         | 1.47                     | 4                   | >gb AAX92952.1  histone H3 - maize [Oryza sativa (japonica cultivar-group)]gb ABA91537.1  histone H3 [Oryza sativa (japonica cultivar-group)]                                                                                                                                                                                                                                                                                                                                                                                                                       | 168   | 5E-28   |
|                       |                 |                     |                          |                     | >emb CAA74653.1  plastid RNA polymerase sigma factor [Sorghum bicolor]                                                                                                                                                                                                                                                                                                                                                                                                                                                                                              | 500   | 2E-67   |
|                       |                 |                     |                          |                     | >gb AAC78468.1  RNA polymerase sigma factor 2 [Zea mays]                                                                                                                                                                                                                                                                                                                                                                                                                                                                                                            | 349   | 5E-67   |
|                       |                 |                     |                          |                     | >gb AAC78467.1  RNA polymerase sigma factor 1 [Zea mays]                                                                                                                                                                                                                                                                                                                                                                                                                                                                                                            | 398   | 1E-65   |
| DV550134              | 9.59E-03        | B73=F1<Mo17         | 1.82                     | 4                   | >emb CAA10725.1  chloroplast sigma factor [Triticum aestivum]                                                                                                                                                                                                                                                                                                                                                                                                                                                                                                       | 461   | 9E-65   |
|                       |                 |                     |                          |                     | >ref XP_480220.1  putative plastid RNA polymerase sigma factor [Oryza sativa(japonica cultivar-group)] dbj BAC99906.1  putative plastid RNA polymerase sigma factor [Oryza sativa (japonica cultivar-group)]                                                                                                                                                                                                                                                                                                                                                        | 342   | 1E-64   |
|                       |                 |                     |                          |                     | >gb AAT44693.1  photosystem I P700 apoprotein A2 [Saccharum hybrid cultivarSP-80-3280] dbj BAD27292.1  PSI P700 apoprotein A2 [Saccharum officinarum] ref YP_054630.1  PSI P700 apoprotein A2 [Saccharum officinarum] sp Q6ENW4 PSAB_SACOF Photosystem I P700 chlorophyll a apoprotein A2 (PsaB) (PSI-B) sp Q6L399 PSAB_SACHY Photosystem I P700 chlorophyll a apoprotein A2 (PsaB) (PSI-B) ref YP_024379.1  photosystem I P700 apoprotein A2 [Saccharum hybrid cultivar SP-80-3280]                                                                                | 734   | e-116   |
|                       |                 |                     |                          |                     | >emb CAD28720.1  PSI P700 apoprotein A2 [Calycanthus floridus var. glaucus]ref NP_862753.1  photosystem I P700 apoprotein A2 [Calycanthus floridus var. glaucus] sp Q7YJX3 PSAB_CALFE Photosystem I P700 chlorophyll a apoprotein A2 (PsaB) (PSI-B)                                                                                                                                                                                                                                                                                                                 | 734   | e-115   |
| DV622534              | 9.60E-03        | Mo17<B73            | 1.51                     | 9                   | >gb ABC73627.1  photosystem I P700 apoprotein A2 [Gossypium hirsutum]                                                                                                                                                                                                                                                                                                                                                                                                                                                                                               | 734   | e-115   |
|                       |                 |                     |                          |                     | >emb CAA60285.1  PSI P700 apoprotein A2 [Zea mays]ref NP_043024.1  photosystem I P700 apoprotein A2 [Zea mays] sp P04967 PSAB_MAIZE Photosystem I P700 chlorophyll a apoprotein A2 (PsaB) (PSI-B)                                                                                                                                                                                                                                                                                                                                                                   | 735   | e-115   |
|                       |                 |                     |                          |                     | >gb AAA84486.1  P700 chlorophyll a-protein PSI-A2                                                                                                                                                                                                                                                                                                                                                                                                                                                                                                                   | 735   | e-115   |
|                       |                 |                     |                          |                     | >gb AAV28627.1  putative 60S ribosomal protein L31 [Zea mays]                                                                                                                                                                                                                                                                                                                                                                                                                                                                                                       | 124   | 5E-46   |
| DV622534              | 9.60E-03        | Mo17<B73            | 1.51                     | 9                   | >ref XP_467485.1  putative 60S ribosomal protein L31 [Oryza sativa (japonica cultivar-group)] dbj BAD12898.1  putative 60S ribosomal protein L31 [Oryza sativa (japonica cultivar-group)]                                                                                                                                                                                                                                                                                                                                                                           | 123   | 1E-45   |

**Table 4. Microarray analysis results, mode of gene action classification, and BLAST annotation for the 1,367 ESTs identified as differentially expressed among genotypes (15% FDR)**

| GenBank accession no. | Overall P value | Significant pattern | Fold change <sup>†</sup> | Sector <sup>‡</sup> | BLAST annotation*                                                                                                                                                                                                                                                                                                                                                                                                                                                                                                                                                                                                                                                                                                                                                                                                                                                                                                                                                                                                                                                                             | Score | E value |
|-----------------------|-----------------|---------------------|--------------------------|---------------------|-----------------------------------------------------------------------------------------------------------------------------------------------------------------------------------------------------------------------------------------------------------------------------------------------------------------------------------------------------------------------------------------------------------------------------------------------------------------------------------------------------------------------------------------------------------------------------------------------------------------------------------------------------------------------------------------------------------------------------------------------------------------------------------------------------------------------------------------------------------------------------------------------------------------------------------------------------------------------------------------------------------------------------------------------------------------------------------------------|-------|---------|
|                       |                 |                     |                          |                     | >ref XP_483237.1  putative 60S ribosomal protein L31 [Oryza sativa (japonica cultivar-group)] dbj BAD10170.1  putative 60S ribosomal protein L31 [Oryza sativa (japonica cultivar-group)] dbj BAD08833.1  putative 60S ribosomal protein L31 [Oryza sativa (japonica cultivar-group)]                                                                                                                                                                                                                                                                                                                                                                                                                                                                                                                                                                                                                                                                                                                                                                                                         | 122   | 1E-45   |
|                       |                 |                     |                          |                     | >dbj BAD61612.1  putative 60S ribosomal protein L31 [Oryza sativa (japonica cultivar-group)]                                                                                                                                                                                                                                                                                                                                                                                                                                                                                                                                                                                                                                                                                                                                                                                                                                                                                                                                                                                                  | 124   | 2E-45   |
|                       |                 |                     |                          |                     | >gb AAV92213.1  60S ribosomal protein L31a [Pseudotsuga menziesii var. menziesii] gb AAV92212.1  60S ribosomal protein L31a [Pseudotsuga menziesii var. menziesii] gb AAV92211.1  60S ribosomal protein L31a [Pseudotsuga menziesii var. menziesii] gb AAV92210.1  60S ribosomal protein L31a [Pseudotsuga menziesii var. menziesii] gb AAV92209.1  60S ribosomal protein L31a [Pseudotsuga menziesii var. menziesii] gb AAV92208.1  60S ribosomal protein L31a [Pseudotsuga menziesii var. menziesii] gb AAV92207.1  60S ribosomal protein L31a [Pseudotsuga menziesii var. menziesii] gb AAV92206.1  60S ribosomal protein L31a [Pseudotsuga menziesii var. menziesii] gb AAV92205.1  60S ribosomal protein L31a [Pseudotsuga menziesii var. menziesii] gb AAV92204.1  60S ribosomal protein L31a [Pseudotsuga menziesii var. menziesii] gb AAV92203.1  60S ribosomal protein L31a [Pseudotsuga menziesii var. menziesii] gb AAV92202.1  60S ribosomal protein L31a [Pseudotsuga menziesii var. menziesii] gb AAV92201.1  60S ribosomal protein L31a [Pseudotsuga menziesii var. menziesii] | 113   | 9E-43   |
| CB239957              | 9.66E-03        | Mo17<B73=F1         | 1.26                     | 10                  | >ref XP_469336.1  unknown protein [Oryza sativa] dbj BAC78563.1  hypothetical protein [Oryza sativa (japonica cultivar-group)] gb AAK14411.1  unknown protein [Oryza sativa]                                                                                                                                                                                                                                                                                                                                                                                                                                                                                                                                                                                                                                                                                                                                                                                                                                                                                                                  | 138   | 8E-34   |
|                       |                 |                     |                          |                     | >ref NP_201245.1  unknown protein [Arabidopsis thaliana] gb AAL34219.1  unknown protein [Arabidopsis thaliana] gb AAK59405.1  unknown protein [Arabidopsis thaliana] dbj BAB09871.1  unnamed protein product [Arabidopsis thaliana]                                                                                                                                                                                                                                                                                                                                                                                                                                                                                                                                                                                                                                                                                                                                                                                                                                                           | 144   | 2E-27   |
|                       |                 |                     |                          |                     | >gb AAS21010.1  unknown [Hyacinthus orientalis]                                                                                                                                                                                                                                                                                                                                                                                                                                                                                                                                                                                                                                                                                                                                                                                                                                                                                                                                                                                                                                               | 150   | 2E-22   |
|                       |                 |                     |                          |                     | >ref NP_196519.1  unknown protein [Arabidopsis thaliana] gb AAO39889.1  At5g09570 [Arabidopsis thaliana] dbj BAC43288.1  unknown protein [Arabidopsis thaliana] emb CAB89373.1  putative protein [Arabidopsis thaliana]                                                                                                                                                                                                                                                                                                                                                                                                                                                                                                                                                                                                                                                                                                                                                                                                                                                                       | 139   | 2E-22   |
|                       |                 |                     |                          |                     | >ref NP_001032137.1  unknown protein [Arabidopsis thaliana]                                                                                                                                                                                                                                                                                                                                                                                                                                                                                                                                                                                                                                                                                                                                                                                                                                                                                                                                                                                                                                   | 162   | 4E-14   |
| DV490002              | 9.67E-03        | F1=Mo17<B73         | 1.35                     | 9                   | >ref NP_915688.1  putative zinc finger protein [Oryza sativa (japonica cultivar-group)] dbj BAB64114.1  putative transparent testa 1 [Oryza sativa (japonica cultivar-group)] dbj BAB86538.1  putative zinc finger protein [Oryza sativa (japonica cultivar-group)]                                                                                                                                                                                                                                                                                                                                                                                                                                                                                                                                                                                                                                                                                                                                                                                                                           | 522   | 7E-59   |
|                       |                 |                     |                          |                     | >gb AAM65531.1  zinc finger protein, putative [Arabidopsis thaliana]                                                                                                                                                                                                                                                                                                                                                                                                                                                                                                                                                                                                                                                                                                                                                                                                                                                                                                                                                                                                                          | 499   | 5E-22   |
|                       |                 |                     |                          |                     | >ref NP_174697.1  nucleic acid binding / transcription factor/ zinc ion binding [Arabidopsis thaliana] ref NP_849746.1  nucleic acid binding / transcription factor/ zinc ion binding [Arabidopsis thaliana] gb AAG51898.1  zinc finger protein, putative; 58191-56692 [Arabidopsis thaliana]                                                                                                                                                                                                                                                                                                                                                                                                                                                                                                                                                                                                                                                                                                                                                                                                 | 499   | 5E-22   |
|                       |                 |                     |                          |                     | >ref NP_001031140.1  nucleic acid binding / zinc ion binding [Arabidopsis thaliana]                                                                                                                                                                                                                                                                                                                                                                                                                                                                                                                                                                                                                                                                                                                                                                                                                                                                                                                                                                                                           | 350   | 5E-22   |
|                       |                 |                     |                          |                     | >ref XP_470361.1  putative zinc finger protein [Oryza sativa (japonica cultivar-group)] gb AAO41119.1  putative zinc finger protein [Oryza sativa (japonica cultivar-group)]                                                                                                                                                                                                                                                                                                                                                                                                                                                                                                                                                                                                                                                                                                                                                                                                                                                                                                                  | 385   | 1E-14   |
| CD651773              | 9.73E-03        | F1=Mo17<B73         | 1.28                     | 9                   | >ref XP_468402.1  putative NADH dehydrogenase [Oryza sativa (japonica cultivar-group)] dbj BAD22016.1  putative NADH dehydrogenase [Oryza sativa (japonica cultivar-group)] dbj BAD21515.1  putative NADH dehydrogenase [Oryza sativa (japonica cultivar-group)]                                                                                                                                                                                                                                                                                                                                                                                                                                                                                                                                                                                                                                                                                                                                                                                                                              | 408   | 2E-74   |
|                       |                 |                     |                          |                     | >ref NP_565469.1  unknown protein [Arabidopsis thaliana] gb AAT68351.1  hypothetical protein At2g20360 [Arabidopsis thaliana] gb AAK93749.1  putative NADH-ubiquinone oxidoreductase [Arabidopsis thaliana] gb AAK59545.1  putative NADH-ubiquinone oxidoreductase [Arabidopsis thaliana] gb AAD21752.2  putative NADH-ubiquinone oxidoreductase [Arabidopsis thaliana] gb AAX23820.1  hypothetical protein At2g20360 [Arabidopsis thaliana]                                                                                                                                                                                                                                                                                                                                                                                                                                                                                                                                                                                                                                                  | 402   | 1E-62   |
|                       |                 |                     |                          |                     | >gb EAN07479.1  NADH dehydrogenase (ubiquinone) 1 alpha subcomplex [Mesorhizobium sp. BNC1] ref ZP_00611528.1  NADH dehydrogenase (ubiquinone) 1 alpha subcomplex [Mesorhizobium sp. BNC1]                                                                                                                                                                                                                                                                                                                                                                                                                                                                                                                                                                                                                                                                                                                                                                                                                                                                                                    | 323   | 1E-16   |
|                       |                 |                     |                          |                     | >ref ZP_00627083.1  oxidoreductase [Nitrobacter hamburgensis X14] gb EAN59795.1  oxidoreductase [Nitrobacter hamburgensis X14]                                                                                                                                                                                                                                                                                                                                                                                                                                                                                                                                                                                                                                                                                                                                                                                                                                                                                                                                                                | 322   | 8E-16   |
|                       |                 |                     |                          |                     | >ref ZP_00845998.1  putative NADH dehydrogenase (ubiquinone) 1 alpha subcomplex [Rhodospseudomonas palustris BisB18] gb EAP12165.1  putative NADH dehydrogenase (ubiquinone) 1 alpha subcomplex [Rhodospseudomonas palustris BisB18]                                                                                                                                                                                                                                                                                                                                                                                                                                                                                                                                                                                                                                                                                                                                                                                                                                                          | 349   | 2E-15   |
| BG841395              | 9.74E-03        | Mo17<B73            | 1.37                     | 9                   | >ref XP_472942.1  OSJNBa0081L15.18 [Oryza sativa (japonica cultivar-group)] emb CAE02006.2  OJ000223_09.8 [Oryza sativa (japonica cultivar-group)] emb CAE03156.2  OSJNBa0081L15.18 [Oryza sativa (japonica cultivar-group)]                                                                                                                                                                                                                                                                                                                                                                                                                                                                                                                                                                                                                                                                                                                                                                                                                                                                  | 505   | 1E-38   |
|                       |                 |                     |                          |                     | >ref XP_466575.1  putative glucose-6-phosphate dehydrogenase [Oryza sativa (japonica cultivar-group)] dbj BAD22150.1  putative glucose-6-phosphate dehydrogenase [Oryza sativa (japonica cultivar-group)]                                                                                                                                                                                                                                                                                                                                                                                                                                                                                                                                                                                                                                                                                                                                                                                                                                                                                     | 517   | 1E-37   |
|                       |                 |                     |                          |                     | >gb AAL79959.1  glucose-6-phosphate dehydrogenase [Oryza sativa (japonica cultivar-group)]                                                                                                                                                                                                                                                                                                                                                                                                                                                                                                                                                                                                                                                                                                                                                                                                                                                                                                                                                                                                    | 505   | 2E-37   |
|                       |                 |                     |                          |                     | >dbj BAA97664.1  glucose-6-phosphate dehydrogenase [Triticum aestivum]                                                                                                                                                                                                                                                                                                                                                                                                                                                                                                                                                                                                                                                                                                                                                                                                                                                                                                                                                                                                                        | 509   | 1E-36   |
|                       |                 |                     |                          |                     | >dbj BAA97663.1  glucose-6-phosphate dehydrogenase [Triticum aestivum]                                                                                                                                                                                                                                                                                                                                                                                                                                                                                                                                                                                                                                                                                                                                                                                                                                                                                                                                                                                                                        | 513   | 1E-36   |
| CB351715              | 9.78E-03        | Mo17<B73=F1         | 1.2                      | 10                  | >ref XP_475153.1  putative nascent polypeptide associated complex alpha chain [Oryza sativa (japonica cultivar-group)] gb AAT58840.1  putative nascent polypeptide associated complex alpha chain [Oryza sativa (japonica cultivar-group)] dbj BAC78570.1  nascent polypeptide associated complex alpha chain [Oryza sativa (japonica cultivar-group)]                                                                                                                                                                                                                                                                                                                                                                                                                                                                                                                                                                                                                                                                                                                                        | 205   | 2E-55   |
|                       |                 |                     |                          |                     | >gb AAT41858.1  At5g13850 [Arabidopsis thaliana] sp Q6ICZ8 NACA3_ARATH Nascent polypeptide-associated complex alpha subunit-like protein 3 (NAC-alpha-like protein 3) (Alpha-NAC-like protein 3)                                                                                                                                                                                                                                                                                                                                                                                                                                                                                                                                                                                                                                                                                                                                                                                                                                                                                              | 204   | 2E-53   |
|                       |                 |                     |                          |                     | >ref NP_187845.1  unknown protein [Arabidopsis thaliana] gb AAM16178.1  AT3g12390/T2E22_130 [Arabidopsis thaliana] gb AAK82495.1  AT3g12390/T2E22_130 [Arabidopsis thaliana] gb AAG51031.1  nascent polypeptide associated complex alpha chain, putative; 85450-84199 [Arabidopsis thaliana] dbj BAB03146.1  unnamed protein product [Arabidopsis thaliana] sp Q9LHG9 NACA1_ARATH Nascent polypeptide-associated complex alpha subunit-like protein 1 (NAC-alpha-like protein 1) (Alpha-NAC-like protein 1)                                                                                                                                                                                                                                                                                                                                                                                                                                                                                                                                                                                   | 203   | 3E-53   |
|                       |                 |                     |                          |                     | >gb AAF27917.1  nascent polypeptide associated complex alpha chain [Pinus taeda] sp Q9M612 NACA_PINTA Nascent polypeptide-associated complex alpha subunit-like protein (NAC-alpha-like protein) (Alpha-NAC-like protein)                                                                                                                                                                                                                                                                                                                                                                                                                                                                                                                                                                                                                                                                                                                                                                                                                                                                     | 205   | 5E-53   |



**Table 4. Microarray analysis results, mode of gene action classification, and BLAST annotation for the 1,367 ESTs identified as differentially expressed among genotypes (15% FDR)**

| GenBank accession no. | Overall P value | Significant pattern | Fold change <sup>†</sup> | Sector <sup>‡</sup> | BLAST annotation*                                                                                                                                                                                                                                                                                                                                                                                                                                                                                                                                                                                                                                                                                                                                                                                                                                                                                                                                                                                                                                                                                                                                                                                                                                                                                                                                                                                                                                                                                                                                                                                                                                                                                                                                                                                                                                                                                                                                                                                                      | Score | E value |
|-----------------------|-----------------|---------------------|--------------------------|---------------------|------------------------------------------------------------------------------------------------------------------------------------------------------------------------------------------------------------------------------------------------------------------------------------------------------------------------------------------------------------------------------------------------------------------------------------------------------------------------------------------------------------------------------------------------------------------------------------------------------------------------------------------------------------------------------------------------------------------------------------------------------------------------------------------------------------------------------------------------------------------------------------------------------------------------------------------------------------------------------------------------------------------------------------------------------------------------------------------------------------------------------------------------------------------------------------------------------------------------------------------------------------------------------------------------------------------------------------------------------------------------------------------------------------------------------------------------------------------------------------------------------------------------------------------------------------------------------------------------------------------------------------------------------------------------------------------------------------------------------------------------------------------------------------------------------------------------------------------------------------------------------------------------------------------------------------------------------------------------------------------------------------------------|-------|---------|
|                       |                 |                     |                          |                     | >ref NP_914976.1  putative nascent polypeptide associated complex alpha chain [Oryzasativa (japonica cultivar-group)] dbj BAB90246.1  putative nascent polypeptide associated complex alpha chain [Oryza sativa (japonica cultivar-group)] dbj BAB89723.1  putative nascent polypeptide associated complex alpha chain [Oryza sativa (japonica cultivar-group)]                                                                                                                                                                                                                                                                                                                                                                                                                                                                                                                                                                                                                                                                                                                                                                                                                                                                                                                                                                                                                                                                                                                                                                                                                                                                                                                                                                                                                                                                                                                                                                                                                                                        | 202   | 9E-53   |
| BM333546              | 9.85E-03        | Mo17<B73=F1         | 1.3                      | 10                  | >gb AAU90153.1  unknown protein [Oryza sativa (japonica cultivar-group)]<br>>ref NP_181349.1  PSRP4 (PLASTID-SPECIFIC RIBOSOMAL PROTEIN 4); structuralconstituent of ribosome [Arabidopsis thaliana] gb AAC27163.1  30S ribosomal protein S31 [Arabidopsis thaliana] gb AAL31104.1  At2g38140/F16M14.7 [Arabidopsis thaliana] gb AAK97685.1  At2g38140/F16M14.7 [Arabidopsis thaliana] gb AAM67339.1  30S ribosomal protein S31 [Arabidopsis thaliana] gb AAF64153.1  plastid-specific ribosomal protein 4 precursor [Arabidopsis thaliana]<br>>ref XP_475453.1  putative 60S ribosomal protein L24 [Oryza sativa (japonica cultivar-group)] gb AAT01333.1  putative 60S ribosomal protein L24 [Oryza sativa (japonica cultivar-group)]                                                                                                                                                                                                                                                                                                                                                                                                                                                                                                                                                                                                                                                                                                                                                                                                                                                                                                                                                                                                                                                                                                                                                                                                                                                                                | 126   | 2E-14   |
| CB815844              | 9.86E-03        | Mo17<B73            | 1.21                     | 9                   | >dbj BAD82702.1  putative 60S ribosomal protein L24 [Oryza sativa (japonica cultivar-group)]<br>>emb CAA63960.1  L24 ribosomal protein [Hordeum vulgare subsp. vulgare] sp P50888 RL24 HORVU 60S ribosomal protein L24<br>>ref NP_911528.1  putative 60S ribosomal protein L24 [Oryza sativa (japonica cultivar-group)] dbj BAD30738.1  putative 60S ribosomal protein L24 [Oryza sativa (japonica cultivar-group)] dbj BAC06922.1  putative 60S ribosomal protein L24 [Oryza sativa (japonica cultivar-group)]<br>>gb AAG13986.1  60S ribosomal protein L24 [Prunus avium] sp Q9FUL4 RL24 PRUAV 60S ribosomal protein L24                                                                                                                                                                                                                                                                                                                                                                                                                                                                                                                                                                                                                                                                                                                                                                                                                                                                                                                                                                                                                                                                                                                                                                                                                                                                                                                                                                                             | 118   | 5E-6    |
|                       |                 |                     |                          |                     | >dbj BAD82702.1  putative 60S ribosomal protein L24 [Oryza sativa (japonica cultivar-group)]                                                                                                                                                                                                                                                                                                                                                                                                                                                                                                                                                                                                                                                                                                                                                                                                                                                                                                                                                                                                                                                                                                                                                                                                                                                                                                                                                                                                                                                                                                                                                                                                                                                                                                                                                                                                                                                                                                                           | 161   | 1E-57   |
|                       |                 |                     |                          |                     | >emb CAA63960.1  L24 ribosomal protein [Hordeum vulgare subsp. vulgare] sp P50888 RL24 HORVU 60S ribosomal protein L24                                                                                                                                                                                                                                                                                                                                                                                                                                                                                                                                                                                                                                                                                                                                                                                                                                                                                                                                                                                                                                                                                                                                                                                                                                                                                                                                                                                                                                                                                                                                                                                                                                                                                                                                                                                                                                                                                                 | 162   | 7E-57   |
|                       |                 |                     |                          |                     | >ref NP_911528.1  putative 60S ribosomal protein L24 [Oryza sativa (japonica cultivar-group)] dbj BAD30738.1  putative 60S ribosomal protein L24 [Oryza sativa (japonica cultivar-group)] dbj BAC06922.1  putative 60S ribosomal protein L24 [Oryza sativa (japonica cultivar-group)]                                                                                                                                                                                                                                                                                                                                                                                                                                                                                                                                                                                                                                                                                                                                                                                                                                                                                                                                                                                                                                                                                                                                                                                                                                                                                                                                                                                                                                                                                                                                                                                                                                                                                                                                  | 162   | 1E-55   |
|                       |                 |                     |                          |                     | >gb AAG13986.1  60S ribosomal protein L24 [Prunus avium] sp Q9FUL4 RL24 PRUAV 60S ribosomal protein L24                                                                                                                                                                                                                                                                                                                                                                                                                                                                                                                                                                                                                                                                                                                                                                                                                                                                                                                                                                                                                                                                                                                                                                                                                                                                                                                                                                                                                                                                                                                                                                                                                                                                                                                                                                                                                                                                                                                | 160   | 6E-54   |
| DV490318              | 9.92E-03        | B73=F1<Mo17         | 1.53                     | 4                   | ns                                                                                                                                                                                                                                                                                                                                                                                                                                                                                                                                                                                                                                                                                                                                                                                                                                                                                                                                                                                                                                                                                                                                                                                                                                                                                                                                                                                                                                                                                                                                                                                                                                                                                                                                                                                                                                                                                                                                                                                                                     | 186   | 3E-53   |
| DV491097              | 9.93E-03        | B73=F1<Mo17         | 1.4                      | 4                   | >ref XP_478168.1  unknown protein [Oryza sativa (japonica cultivar-group)] dbj BAC80068.1  unknown protein [Oryza sativa (japonica cultivar-group)]<br>>ref NP_199935.2  unknown protein [Arabidopsis thaliana] gb AAAY27063.1  At5g51220 [Arabidopsis thaliana]                                                                                                                                                                                                                                                                                                                                                                                                                                                                                                                                                                                                                                                                                                                                                                                                                                                                                                                                                                                                                                                                                                                                                                                                                                                                                                                                                                                                                                                                                                                                                                                                                                                                                                                                                       | 302   | 2E-24   |
| DV621900              | 9.93E-03        | B73=F1<Mo17         | 1.25                     | 4                   | ns                                                                                                                                                                                                                                                                                                                                                                                                                                                                                                                                                                                                                                                                                                                                                                                                                                                                                                                                                                                                                                                                                                                                                                                                                                                                                                                                                                                                                                                                                                                                                                                                                                                                                                                                                                                                                                                                                                                                                                                                                     | 281   | 4E-10   |
| CB605196              | 9.94E-03        | B73<F1=Mo17         | 1.27                     | 3                   | >ref XP_470662.1  Putative phosphate/phosphoenolpyruvate translocator protein [Oryzasativa (japonica cultivar-group)] gb AAO16996.1  Putative phosphate/phosphoenolpyruvate translocator protein [Oryza sativa (japonica cultivar-group)]<br>>ref NP_187740.2  organic anion transporter [Arabidopsis thaliana] gb AAU94370.1  At3g11320 [Arabidopsis thaliana]<br>>gb AAG50965.1  integral membrane protein, putative; 85705-84183 [Arabidopsisthaliana]<br>>dbj BAD91177.1  plastidic phosphate translocator-like protein2 [Mesembryanthemumcrystallinum]<br>>ref NP_196201.2  organic anion transporter [Arabidopsis thaliana] gb AAU45213.1  At5g05820 [Arabidopsis thaliana] gb AAT70430.1  At5g05820 [Arabidopsis thaliana]                                                                                                                                                                                                                                                                                                                                                                                                                                                                                                                                                                                                                                                                                                                                                                                                                                                                                                                                                                                                                                                                                                                                                                                                                                                                                      | 322   | 7E-40   |
|                       |                 |                     |                          |                     | >ref NP_187740.2  organic anion transporter [Arabidopsis thaliana] gb AAU94370.1  At3g11320 [Arabidopsis thaliana]                                                                                                                                                                                                                                                                                                                                                                                                                                                                                                                                                                                                                                                                                                                                                                                                                                                                                                                                                                                                                                                                                                                                                                                                                                                                                                                                                                                                                                                                                                                                                                                                                                                                                                                                                                                                                                                                                                     | 308   | 2E-35   |
|                       |                 |                     |                          |                     | >gb AAG50965.1  integral membrane protein, putative; 85705-84183 [Arabidopsisthaliana]                                                                                                                                                                                                                                                                                                                                                                                                                                                                                                                                                                                                                                                                                                                                                                                                                                                                                                                                                                                                                                                                                                                                                                                                                                                                                                                                                                                                                                                                                                                                                                                                                                                                                                                                                                                                                                                                                                                                 | 344   | 2E-35   |
|                       |                 |                     |                          |                     | >dbj BAD91177.1  plastidic phosphate translocator-like protein2 [Mesembryanthemumcrystallinum]                                                                                                                                                                                                                                                                                                                                                                                                                                                                                                                                                                                                                                                                                                                                                                                                                                                                                                                                                                                                                                                                                                                                                                                                                                                                                                                                                                                                                                                                                                                                                                                                                                                                                                                                                                                                                                                                                                                         | 306   | 1E-34   |
|                       |                 |                     |                          |                     | >ref NP_196201.2  organic anion transporter [Arabidopsis thaliana] gb AAU45213.1  At5g05820 [Arabidopsis thaliana] gb AAT70430.1  At5g05820 [Arabidopsis thaliana]                                                                                                                                                                                                                                                                                                                                                                                                                                                                                                                                                                                                                                                                                                                                                                                                                                                                                                                                                                                                                                                                                                                                                                                                                                                                                                                                                                                                                                                                                                                                                                                                                                                                                                                                                                                                                                                     | 309   | 2E-33   |
| BM080160              | 9.96E-03        | Mo17<F1             | 1.27                     | 11                  | >ref NP_912352.1  putative LIM-domain protein [Oryza sativa (japonica cultivar-group)] gb AAP06876.1  putative LIM-domain protein [Oryza sativa (japonica cultivar-group)]<br>>gb AAL38006.1  LIM domain protein [Gossypium hirsutum]<br>>emb CAA71891.1  LIM-domain SF3 protein [Nicotiana tabacum] gb AAD56951.1  LIM domain protein W LIM2 [Nicotiana tabacum]<br>>ref NP_001030870.1  zinc ion binding [Arabidopsis thaliana] ref NP_680133.2  zinc ion binding [Arabidopsis thaliana] ref NP_001030868.1  zinc ion binding [Arabidopsis thaliana] ref NP_001030869.1  zinc ion binding [Arabidopsis thaliana] ref NP_191136.1  zinc ion binding [Arabidopsis thaliana] emb CAB81602.1  transcription factor L2 [Arabidopsis thaliana] gb AAM14188.1  putative transcription factor L2 [Arabidopsis thaliana] gb AAL36280.1  putative transcription factor L2 [Arabidopsis thaliana] gb AAM60942.1  transcription factor L2 [Arabidopsis thaliana]<br>>gb AAK49580.1  transcription factor L2 [Arabidopsis thaliana]                                                                                                                                                                                                                                                                                                                                                                                                                                                                                                                                                                                                                                                                                                                                                                                                                                                                                                                                                                                               | 196   | 4E-52   |
|                       |                 |                     |                          |                     | >gb AAL38006.1  LIM domain protein [Gossypium hirsutum]                                                                                                                                                                                                                                                                                                                                                                                                                                                                                                                                                                                                                                                                                                                                                                                                                                                                                                                                                                                                                                                                                                                                                                                                                                                                                                                                                                                                                                                                                                                                                                                                                                                                                                                                                                                                                                                                                                                                                                | 189   | 1E-47   |
|                       |                 |                     |                          |                     | >emb CAA71891.1  LIM-domain SF3 protein [Nicotiana tabacum] gb AAD56951.1  LIM domain protein W LIM2 [Nicotiana tabacum]                                                                                                                                                                                                                                                                                                                                                                                                                                                                                                                                                                                                                                                                                                                                                                                                                                                                                                                                                                                                                                                                                                                                                                                                                                                                                                                                                                                                                                                                                                                                                                                                                                                                                                                                                                                                                                                                                               | 189   | 1E-46   |
|                       |                 |                     |                          |                     | >ref NP_001030870.1  zinc ion binding [Arabidopsis thaliana] ref NP_680133.2  zinc ion binding [Arabidopsis thaliana] ref NP_001030868.1  zinc ion binding [Arabidopsis thaliana] ref NP_001030869.1  zinc ion binding [Arabidopsis thaliana] ref NP_191136.1  zinc ion binding [Arabidopsis thaliana] emb CAB81602.1  transcription factor L2 [Arabidopsis thaliana] gb AAM14188.1  putative transcription factor L2 [Arabidopsis thaliana] gb AAL36280.1  putative transcription factor L2 [Arabidopsis thaliana] gb AAM60942.1  transcription factor L2 [Arabidopsis thaliana]                                                                                                                                                                                                                                                                                                                                                                                                                                                                                                                                                                                                                                                                                                                                                                                                                                                                                                                                                                                                                                                                                                                                                                                                                                                                                                                                                                                                                                      | 199   | 7E-44   |
|                       |                 |                     |                          |                     | >gb AAK49580.1  transcription factor L2 [Arabidopsis thaliana]                                                                                                                                                                                                                                                                                                                                                                                                                                                                                                                                                                                                                                                                                                                                                                                                                                                                                                                                                                                                                                                                                                                                                                                                                                                                                                                                                                                                                                                                                                                                                                                                                                                                                                                                                                                                                                                                                                                                                         | 148   | 7E-44   |
| DV491411              | 9.99E-03        | B73=F1<Mo17         | 4.08                     | 4                   | >ref XP_479018.1  putative rRNA methylase [Oryza sativa (japonica cultivar-group)] dbj BAC83213.1  putative rRNA methylase [Oryza sativa (japonica cultivar-group)]<br>>ref NP_197043.1  RNA binding / RNA methyltransferase [Arabidopsis thaliana] emb CAB89349.1  rRNA methylase-like protein [Arabidopsis thaliana]<br>>gb AAR88654.1  rRNA methylase-like protein [Viscum album]<br>>ref YP_445016.1  rRNA methylase [Salinibacter ruber DSM 13855] gb ABC44820.1  rRNA methylase [Salinibacter ruber DSM 13855]<br>>emb CAE79110.1  putative RNA methylase [Bdellovibrio bacteriovorus HD100] ref NP_968117.1  putative RNA methylase [Bdellovibrio bacteriovorus HD100]<br>>emb CAA59798.1  O-acetylserine (thiol) lyase; cysteine synthase [Zea mays] sp P80608 CYSK_MAIZE Cysteine synthase (O-acetylserine sulfhydrylase) (O-acetylserine (Thiol)-lyase) (CSase) (OAS-TL)<br>>sp P38076 CYSK_WHEAT Cysteine synthase (O-acetylserine sulfhydrylase) (O-acetylserine (Thiol)-lyase) (CSase A) (OAS-TL A) dbj BAA02438.1  O-acetylserine (thiol) lyase [Triticum aestivum]<br>>gb ABA99438.1  cysteine synthase A [Oryza sativa (japonica cultivar-group)]<br>>gb AAD23907.1  cysteine synthase [Oryza sativa]<br>>sp Q9XEA6 CYSK1_ORYSA Cysteine synthase (O-acetylserine sulfhydrylase) (O-acetylserine (Thiol)-lyase) (CSase) (OAS-TL)<br>>ref XP_482149.1  putative transformer-SR ribonucleoprotein [Oryza sativa (japonica cultivar-group)] dbj BAD05836.1  putative transformer-SR ribonucleoprotein [Oryza sativa (japonica cultivar-group)] dbj BAD05420.1  putative transformer-SR ribonucleoprotein [Oryza sativa (japonica cultivar-group)]<br>>gb AA84876.1  alternative splicing regulator [Triticum aestivum]<br>>emb CAA70700.1  transformer-SR ribonucleoprotein [Nicotiana tabacum]<br>>dbj BAD62534.1  putative transformer-SR ribonucleoprotein [Oryza sativa (japonica cultivar-group)] dbj BAD61690.1  putative transformer-SR ribonucleoprotein [Oryza sativa (japonica cultivar-group)] | 343   | 5E-25   |
|                       |                 |                     |                          |                     | >ref NP_197043.1  RNA binding / RNA methyltransferase [Arabidopsis thaliana] emb CAB89349.1  rRNA methylase-like protein [Arabidopsis thaliana]                                                                                                                                                                                                                                                                                                                                                                                                                                                                                                                                                                                                                                                                                                                                                                                                                                                                                                                                                                                                                                                                                                                                                                                                                                                                                                                                                                                                                                                                                                                                                                                                                                                                                                                                                                                                                                                                        | 350   | 9E-16   |
|                       |                 |                     |                          |                     | >gb AAR88654.1  rRNA methylase-like protein [Viscum album]                                                                                                                                                                                                                                                                                                                                                                                                                                                                                                                                                                                                                                                                                                                                                                                                                                                                                                                                                                                                                                                                                                                                                                                                                                                                                                                                                                                                                                                                                                                                                                                                                                                                                                                                                                                                                                                                                                                                                             | 368   | 2E-14   |
|                       |                 |                     |                          |                     | >ref YP_445016.1  rRNA methylase [Salinibacter ruber DSM 13855] gb ABC44820.1  rRNA methylase [Salinibacter ruber DSM 13855]                                                                                                                                                                                                                                                                                                                                                                                                                                                                                                                                                                                                                                                                                                                                                                                                                                                                                                                                                                                                                                                                                                                                                                                                                                                                                                                                                                                                                                                                                                                                                                                                                                                                                                                                                                                                                                                                                           | 247   | 3E-6    |
|                       |                 |                     |                          |                     | >emb CAE79110.1  putative RNA methylase [Bdellovibrio bacteriovorus HD100] ref NP_968117.1  putative RNA methylase [Bdellovibrio bacteriovorus HD100]                                                                                                                                                                                                                                                                                                                                                                                                                                                                                                                                                                                                                                                                                                                                                                                                                                                                                                                                                                                                                                                                                                                                                                                                                                                                                                                                                                                                                                                                                                                                                                                                                                                                                                                                                                                                                                                                  | 238   | 9E-6    |
| CB834100              | 1.00E-02        | Mo17<B73=F1         | 1.25                     | 10                  | >emb CAA59798.1  O-acetylserine (thiol) lyase; cysteine synthase [Zea mays] sp P80608 CYSK_MAIZE Cysteine synthase (O-acetylserine sulfhydrylase) (O-acetylserine (Thiol)-lyase) (CSase) (OAS-TL)<br>>sp P38076 CYSK_WHEAT Cysteine synthase (O-acetylserine sulfhydrylase) (O-acetylserine (Thiol)-lyase) (CSase A) (OAS-TL A) dbj BAA02438.1  O-acetylserine (thiol) lyase [Triticum aestivum]<br>>gb ABA99438.1  cysteine synthase A [Oryza sativa (japonica cultivar-group)]<br>>gb AAD23907.1  cysteine synthase [Oryza sativa]<br>>sp Q9XEA6 CYSK1_ORYSA Cysteine synthase (O-acetylserine sulfhydrylase) (O-acetylserine (Thiol)-lyase) (CSase) (OAS-TL)<br>>ref XP_482149.1  putative transformer-SR ribonucleoprotein [Oryza sativa (japonica cultivar-group)] dbj BAD05836.1  putative transformer-SR ribonucleoprotein [Oryza sativa (japonica cultivar-group)] dbj BAD05420.1  putative transformer-SR ribonucleoprotein [Oryza sativa (japonica cultivar-group)]<br>>gb AA84876.1  alternative splicing regulator [Triticum aestivum]<br>>emb CAA70700.1  transformer-SR ribonucleoprotein [Nicotiana tabacum]<br>>dbj BAD62534.1  putative transformer-SR ribonucleoprotein [Oryza sativa (japonica cultivar-group)] dbj BAD61690.1  putative transformer-SR ribonucleoprotein [Oryza sativa (japonica cultivar-group)]                                                                                                                                                                                                                                                                                                                                                                                                                                                                                                                                                                                                                                                                                  | 325   | 8E-66   |
|                       |                 |                     |                          |                     | >emb CAA59798.1  O-acetylserine (thiol) lyase; cysteine synthase [Zea mays] sp P80608 CYSK_MAIZE Cysteine synthase (O-acetylserine sulfhydrylase) (O-acetylserine (Thiol)-lyase) (CSase) (OAS-TL)                                                                                                                                                                                                                                                                                                                                                                                                                                                                                                                                                                                                                                                                                                                                                                                                                                                                                                                                                                                                                                                                                                                                                                                                                                                                                                                                                                                                                                                                                                                                                                                                                                                                                                                                                                                                                      | 325   | 1E-62   |
|                       |                 |                     |                          |                     | >sp P38076 CYSK_WHEAT Cysteine synthase (O-acetylserine sulfhydrylase) (O-acetylserine (Thiol)-lyase) (CSase A) (OAS-TL A) dbj BAA02438.1  O-acetylserine (thiol) lyase [Triticum aestivum]                                                                                                                                                                                                                                                                                                                                                                                                                                                                                                                                                                                                                                                                                                                                                                                                                                                                                                                                                                                                                                                                                                                                                                                                                                                                                                                                                                                                                                                                                                                                                                                                                                                                                                                                                                                                                            | 330   | 1E-61   |
|                       |                 |                     |                          |                     | >gb ABA99438.1  cysteine synthase A [Oryza sativa (japonica cultivar-group)]                                                                                                                                                                                                                                                                                                                                                                                                                                                                                                                                                                                                                                                                                                                                                                                                                                                                                                                                                                                                                                                                                                                                                                                                                                                                                                                                                                                                                                                                                                                                                                                                                                                                                                                                                                                                                                                                                                                                           | 321   | 3E-61   |
|                       |                 |                     |                          |                     | >gb AAD23907.1  cysteine synthase [Oryza sativa]                                                                                                                                                                                                                                                                                                                                                                                                                                                                                                                                                                                                                                                                                                                                                                                                                                                                                                                                                                                                                                                                                                                                                                                                                                                                                                                                                                                                                                                                                                                                                                                                                                                                                                                                                                                                                                                                                                                                                                       | 321   | 3E-61   |
|                       |                 |                     |                          |                     | >sp Q9XEA6 CYSK1_ORYSA Cysteine synthase (O-acetylserine sulfhydrylase) (O-acetylserine (Thiol)-lyase) (CSase) (OAS-TL)                                                                                                                                                                                                                                                                                                                                                                                                                                                                                                                                                                                                                                                                                                                                                                                                                                                                                                                                                                                                                                                                                                                                                                                                                                                                                                                                                                                                                                                                                                                                                                                                                                                                                                                                                                                                                                                                                                | 321   | 3E-61   |
| DV494228              | 1.00E-02        | Mo17<F1             | 1.52                     | 12                  | >ref XP_482149.1  putative transformer-SR ribonucleoprotein [Oryza sativa (japonica cultivar-group)] dbj BAD05836.1  putative transformer-SR ribonucleoprotein [Oryza sativa (japonica cultivar-group)] dbj BAD05420.1  putative transformer-SR ribonucleoprotein [Oryza sativa (japonica cultivar-group)]<br>>gb AA84876.1  alternative splicing regulator [Triticum aestivum]<br>>emb CAA70700.1  transformer-SR ribonucleoprotein [Nicotiana tabacum]<br>>dbj BAD62534.1  putative transformer-SR ribonucleoprotein [Oryza sativa (japonica cultivar-group)] dbj BAD61690.1  putative transformer-SR ribonucleoprotein [Oryza sativa (japonica cultivar-group)]                                                                                                                                                                                                                                                                                                                                                                                                                                                                                                                                                                                                                                                                                                                                                                                                                                                                                                                                                                                                                                                                                                                                                                                                                                                                                                                                                     | 279   | 8E-45   |
|                       |                 |                     |                          |                     | >gb AA84876.1  alternative splicing regulator [Triticum aestivum]                                                                                                                                                                                                                                                                                                                                                                                                                                                                                                                                                                                                                                                                                                                                                                                                                                                                                                                                                                                                                                                                                                                                                                                                                                                                                                                                                                                                                                                                                                                                                                                                                                                                                                                                                                                                                                                                                                                                                      | 250   | 7E-40   |
|                       |                 |                     |                          |                     | >emb CAA70700.1  transformer-SR ribonucleoprotein [Nicotiana tabacum]                                                                                                                                                                                                                                                                                                                                                                                                                                                                                                                                                                                                                                                                                                                                                                                                                                                                                                                                                                                                                                                                                                                                                                                                                                                                                                                                                                                                                                                                                                                                                                                                                                                                                                                                                                                                                                                                                                                                                  | 235   | 8E-31   |
|                       |                 |                     |                          |                     | >dbj BAD62534.1  putative transformer-SR ribonucleoprotein [Oryza sativa (japonica cultivar-group)] dbj BAD61690.1  putative transformer-SR ribonucleoprotein [Oryza sativa (japonica cultivar-group)]                                                                                                                                                                                                                                                                                                                                                                                                                                                                                                                                                                                                                                                                                                                                                                                                                                                                                                                                                                                                                                                                                                                                                                                                                                                                                                                                                                                                                                                                                                                                                                                                                                                                                                                                                                                                                 | 273   | 8E-31   |

**Table 4. Microarray analysis results, mode of gene action classification, and BLAST annotation for the 1,367 ESTs identified as differentially expressed among genotypes (15% FDR)**

| GenBank accession no. | Overall P value | Significant pattern | Fold change <sup>†</sup> | Sector <sup>‡</sup> | BLAST annotation*                                                                                                                                                                                                                                                                                                                                                                                                                                                                                                                                                                                                                                                            | Score | E value |
|-----------------------|-----------------|---------------------|--------------------------|---------------------|------------------------------------------------------------------------------------------------------------------------------------------------------------------------------------------------------------------------------------------------------------------------------------------------------------------------------------------------------------------------------------------------------------------------------------------------------------------------------------------------------------------------------------------------------------------------------------------------------------------------------------------------------------------------------|-------|---------|
|                       |                 |                     |                          |                     | >ref NP_912347.1  putative transformer serine/arginine-rich ribonucleoprotein [Oryzasativa (japonica cultivar-group)] gb AAP06839.1  putative transformer serine/arginine-rich ribonucleoprotein [Oryza sativa (japonica cultivar-group)]                                                                                                                                                                                                                                                                                                                                                                                                                                    | 324   | 9E-30   |
| DV550737              | 1.00E-02        | Mo17<B73=F1         | 1.5                      | 11                  | >ref XP_450411.1  unknown protein [Oryza sativa (japonica cultivar-group)] dbj BAD26204.1  unknown protein [Oryza sativa (japonica cultivar-group)] dbj BAD26132.1  unknown protein [Oryza sativa (japonica cultivar-group)]                                                                                                                                                                                                                                                                                                                                                                                                                                                 | 176   | 9E-24   |
|                       |                 |                     |                          |                     | >ref XP_472777.1  OSJNBa0060P14.7 [Oryza sativa (japonica cultivar-group)] emb CAD41036.1  OSJNBa0060P14.7 [Oryza sativa (japonica cultivar-group)]                                                                                                                                                                                                                                                                                                                                                                                                                                                                                                                          | 119   | 5E-9    |
|                       |                 |                     |                          |                     | >ref XP_472812.1  OSJNBa0016O02.17 [Oryza sativa (japonica cultivar-group)] emb CAE06007.3  OSJNBa0016O02.17 [Oryza sativa (japonica cultivar-group)]                                                                                                                                                                                                                                                                                                                                                                                                                                                                                                                        | 122   | 2E-8    |
|                       |                 |                     |                          |                     | >dbj BAD29340.1  hypothetical protein [Oryza sativa (japonica cultivar-group)] dbj BAD17466.1  hypothetical protein [Oryza sativa (japonica cultivar-group)]                                                                                                                                                                                                                                                                                                                                                                                                                                                                                                                 | 117   | 2E-8    |
|                       |                 |                     |                          |                     | >dbj BAD29339.1  hypothetical protein [Oryza sativa (japonica cultivar-group)] dbj BAD17465.1  hypothetical protein [Oryza sativa (japonica cultivar-group)]                                                                                                                                                                                                                                                                                                                                                                                                                                                                                                                 | 119   | 3E-8    |
| CB886176              | 1.00E-02        | Mo17<B73=F1         | 1.35                     | 10                  | >gb ABA98987.1  expressed protein [Oryza sativa (japonica cultivar-group)]                                                                                                                                                                                                                                                                                                                                                                                                                                                                                                                                                                                                   | 106   | 2E-43   |
|                       |                 |                     |                          |                     | >gb AAM64270.1  unknown [Arabidopsis thaliana]                                                                                                                                                                                                                                                                                                                                                                                                                                                                                                                                                                                                                               | 104   | 4E-30   |
|                       |                 |                     |                          |                     | >ref NP_568115.1  unknown protein [Arabidopsis thaliana]                                                                                                                                                                                                                                                                                                                                                                                                                                                                                                                                                                                                                     | 104   | 2E-29   |
|                       |                 |                     |                          |                     | >gb AAX55666.1  11 kDa salivary protein [Phlebotomus ariasi]                                                                                                                                                                                                                                                                                                                                                                                                                                                                                                                                                                                                                 | 114   | 1E-6    |
|                       |                 |                     |                          |                     | >gb EAA15151.2  ENSANGP0000010639 [Anopheles gambiae str. PEST] ref XP_319892.2  ENSANGP0000010639 [Anopheles gambiae str. PEST]                                                                                                                                                                                                                                                                                                                                                                                                                                                                                                                                             | 108   | 2E-6    |
| BM268642              | 1.01E-02        | Mo17<B73=F1         | 2.14                     | 11                  | >gb AAO47712.1  transcription factor MADS57 [Oryza sativa (japonica cultivar-group)]                                                                                                                                                                                                                                                                                                                                                                                                                                                                                                                                                                                         | 241   | 1E-23   |
|                       |                 |                     |                          |                     | >ref XP_467621.1  transcription factor MADS57 [Oryza sativa (japonica cultivar-group)] dbj BAD15933.1  transcription factor MADS57 [Oryza sativa (japonica cultivar-group)]                                                                                                                                                                                                                                                                                                                                                                                                                                                                                                  | 237   | 1E-23   |
|                       |                 |                     |                          |                     | >gb AAO72601.1  MADS box protein-like protein [Oryza sativa (japonica cultivar-group)]                                                                                                                                                                                                                                                                                                                                                                                                                                                                                                                                                                                       | 241   | 5E-23   |
|                       |                 |                     |                          |                     | >emb CAB09793.1  ANR1, MADS-box protein [Arabidopsis thaliana]                                                                                                                                                                                                                                                                                                                                                                                                                                                                                                                                                                                                               | 234   | 8E-23   |
|                       |                 |                     |                          |                     | >ref NP_179033.1  ANR1; DNA binding / transcription factor [Arabidopsis thaliana] gb AAD25638.1  putative MADS-box protein ANR1 [Arabidopsis thaliana]                                                                                                                                                                                                                                                                                                                                                                                                                                                                                                                       | 234   | 8E-23   |
|                       |                 |                     |                          |                     | gb AAO64796.1  At2g14210 [Arabidopsis thaliana]                                                                                                                                                                                                                                                                                                                                                                                                                                                                                                                                                                                                                              | 234   | 8E-23   |
| CD651663              | 1.01E-02        | Mo17<B73=F1         | 1.37                     | 10                  | ns                                                                                                                                                                                                                                                                                                                                                                                                                                                                                                                                                                                                                                                                           |       |         |
| CB334593              | 1.01E-02        | B73<F1=Mo17         | 1.63                     | 3                   | >ref XP_463936.1  putative NADPH-dependent mannose 6-phosphate reductase [Oryzasativa (japonica cultivar-group)] dbj BAD07953.1  putative NADPH-dependent mannose 6-phosphate reductase [Oryza sativa (japonica cultivar-group)]                                                                                                                                                                                                                                                                                                                                                                                                                                             | 319   | 6E-59   |
|                       |                 |                     |                          |                     | >ref XP_506697.1  PREDICTED P0575F10.14 gene product [Oryza sativa (japonica cultivar-group)]                                                                                                                                                                                                                                                                                                                                                                                                                                                                                                                                                                                | 375   | 6E-59   |
|                       |                 |                     |                          |                     | >gb AAP80625.1  NADPH-dependent mannose 6-phosphate reductase [Triticum aestivum]                                                                                                                                                                                                                                                                                                                                                                                                                                                                                                                                                                                            | 274   | 2E-57   |
|                       |                 |                     |                          |                     | >gb AAM64779.1  putative NADPH dependent mannose 6-phosphate reductase [Arabidopsis thaliana]                                                                                                                                                                                                                                                                                                                                                                                                                                                                                                                                                                                | 309   | 2E-55   |
|                       |                 |                     |                          |                     | >ref NP_179721.1  oxidoreductase [Arabidopsis thaliana] gb AAM13238.1  putative NADPH-dependent mannose 6-phosphate reductase [Arabidopsis thaliana]                                                                                                                                                                                                                                                                                                                                                                                                                                                                                                                         |       |         |
|                       |                 |                     |                          |                     | gb AAM15409.1  putative NADPH dependent mannose 6-phosphate reductase [Arabidopsis thaliana] gb AAD23673.1  putative NADPH dependent mannose 6-phosphate reductase [Arabidopsis thaliana] gb AAN65130.1  putative NADPH-dependent mannose 6-phosphate reductase [Arabidopsis thaliana]                                                                                                                                                                                                                                                                                                                                                                                       | 309   | 2E-55   |
| BM350305              | 1.01E-02        | Mo17<F1             | 1.36                     | 11                  | ns                                                                                                                                                                                                                                                                                                                                                                                                                                                                                                                                                                                                                                                                           |       |         |
| DV495001              | 1.01E-02        | Mo17<B73=F1         | 1.29                     | 11                  | >ref NP_910584.1  EST AU082567(S21715) corresponds to a region of the predicted gene.~Similar to S.tuberosum ubiquinol cytochrome c reductase. (X79275) [Oryza sativa (japonica cultivar-group)] ref NP_910574.1  EST AU082567(S21715) corresponds to a region of the predicted gene.~Similar to S.tuberosum ubiquinol-cytochrome c reductase. (X79275) [Oryza sativa (japonica cultivar-group)] dbj BAA95831.1  putative ubiquinol-cytochrome C reductase complex ubiquinone-binding protein [Oryza sativa (japonica cultivar-group)] dbj BAA95821.1  putative ubiquinol-cytochrome C reductase complex ubiquinone-binding protein [Oryza sativa (japonica cultivar-group)] | 72    | 5E-34   |
|                       |                 |                     |                          |                     | >ref NP_187697.1  ubiquinol-cytochrome-c reductase [Arabidopsis thaliana] gb AAF19563.1  putative ubiquinol-cytochrome C reductase complex ubiquinone-binding protein (QP-C) [Arabidopsis thaliana] gb AAN17451.1  putative ubiquinol-cytochrome C reductase complex ubiquinone-binding protein (QP-C) [Arabidopsis thaliana] gb AAP21315.1  At3g10860 [Arabidopsis thaliana] gb AAM64437.1  putative ubiquinol-cytochrome C reductase complex ubiquinone-binding protein (QP-C) [Arabidopsis thaliana]                                                                                                                                                                      | 72    | 7E-28   |
|                       |                 |                     |                          |                     | >ref NP_196156.1  ubiquinol-cytochrome-c reductase [Arabidopsis thaliana] gb AAQ65099.1  At5g05370 [Arabidopsis thaliana] dbj BAB09980.1  ubiquinol-cytochrome C reductase complex ubiquinone-binding protein [Arabidopsis thaliana]                                                                                                                                                                                                                                                                                                                                                                                                                                         | 72    | 2E-26   |
|                       |                 |                     |                          |                     | >emb CAA55862.1  ubiquinol-cytochrome c reductase [Solanum tuberosum] sp P46269 UCRQ_SOLTU Ubiquinol-cytochrome c reductase complex ubiquinone-binding protein QP-C (Ubiquinol-cytochrome c reductase complex 8.2 kDa protein) prf 2107179A cytochrome c oxidase:SUBUNIT=8.2kD                                                                                                                                                                                                                                                                                                                                                                                               | 72    | 4E-26   |
|                       |                 |                     |                          |                     | >gb AAP80673.1  cytochrome reductase [Triticum aestivum]                                                                                                                                                                                                                                                                                                                                                                                                                                                                                                                                                                                                                     | 115   | 4E-12   |
| DV551022              | 1.01E-02        | B73<F1=Mo17         | 1.39                     | 2                   | >ref NP_180259.1  ATPase, coupled to transmembrane movement of substances [Arabidopsis thaliana] tpg DAA00872.1  TPA: TPA_exp: PDR4 ABC transporter [Arabidopsis thaliana] gb AAC32236.1  putative ABC transporter [Arabidopsis thaliana]                                                                                                                                                                                                                                                                                                                                                                                                                                    | 1420  | 4E-35   |
|                       |                 |                     |                          |                     | >ref XP_482141.1  putative PDR-like ABC transporter [Oryza sativa (japonica cultivar-group)] dbj BAD05827.1  putative PDR-like ABC transporter [Oryza sativa (japonica cultivar-group)]                                                                                                                                                                                                                                                                                                                                                                                                                                                                                      | 1489  | 2E-33   |
|                       |                 |                     |                          |                     | >emb CAC40990.1  ABC1 protein [Nicotiana glauca]                                                                                                                                                                                                                                                                                                                                                                                                                                                                                                                                                                                                                             | 1436  | 1E-32   |
|                       |                 |                     |                          |                     | >dbj BAD07483.1  PDR-type ABC transporter 1 [Nicotiana glauca]                                                                                                                                                                                                                                                                                                                                                                                                                                                                                                                                                                                                               | 1434  | 6E-32   |
|                       |                 |                     |                          |                     | >dbj BAB92011.1  pleiotropic drug resistance like protein [Nicotiana glauca]                                                                                                                                                                                                                                                                                                                                                                                                                                                                                                                                                                                                 | 1434  | 6E-32   |
| BM074151              | 1.01E-02        | Mo17<B73=F1         | 1.43                     | 10                  | >gb AAW56866.1  unknown protein [Oryza sativa (japonica cultivar-group)]                                                                                                                                                                                                                                                                                                                                                                                                                                                                                                                                                                                                     | 254   | 1E-21   |
|                       |                 |                     |                          |                     | >ref NP_973950.1  N-acetyltransferase [Arabidopsis thaliana] gb AAP22085.1  nuclear shuttle interacting protein [Arabidopsis thaliana]                                                                                                                                                                                                                                                                                                                                                                                                                                                                                                                                       | 258   | 1E-16   |

**Table 4. Microarray analysis results, mode of gene action classification, and BLAST annotation for the 1,367 ESTs identified as differentially expressed among genotypes (15% FDR)**

| GenBank accession no. | Overall P value | Significant pattern | Fold change <sup>‡</sup> | Sector <sup>‡</sup> | BLAST annotation*                                                                                                                                                                                                                                                                                                                                                                                               | Score | E value |
|-----------------------|-----------------|---------------------|--------------------------|---------------------|-----------------------------------------------------------------------------------------------------------------------------------------------------------------------------------------------------------------------------------------------------------------------------------------------------------------------------------------------------------------------------------------------------------------|-------|---------|
|                       |                 |                     |                          |                     | >ref NP_564387.1  N-acetyltransferase [Arabidopsis thaliana]gb AAM64262.1  unknown [Arabidopsis thaliana]                                                                                                                                                                                                                                                                                                       | 257   | 1E-16   |
|                       |                 |                     |                          |                     | >gb AAG50796.1  unknown protein [Arabidopsis thaliana]                                                                                                                                                                                                                                                                                                                                                          | 230   | 1E-16   |
|                       |                 |                     |                          |                     | >ref YP_476759.1  acetyltransferase, GNAT family [Cyanobacteria bacterium YellowstoneB-Prime]                                                                                                                                                                                                                                                                                                                   | 174   | 2E-13   |
| DV549485              | 1.02E-02        | B73=F1<Mo17         | 1.64                     | 4                   | >ref NP_922302.1  kinesin-like protein [Oryza sativa (japonica cultivar-group)]gb AAG13527.1  kinesin-like protein [Oryza sativa (japonica cultivar-group)]                                                                                                                                                                                                                                                     | 859   | 2E-10   |
| CAB29998              | 1.02E-02        | Mo17<B73=F1         | 1.33                     | 11                  | gb AAP54589.1  kinesin-like protein [Oryza sativa (japonica cultivar-group)]                                                                                                                                                                                                                                                                                                                                    | 419   | 1E-30   |
|                       |                 |                     |                          |                     | >gb AAC08009.1  DnaJ-related protein ZMDJ1 [Zea mays]                                                                                                                                                                                                                                                                                                                                                           | 416   | 2E-30   |
|                       |                 |                     |                          |                     | >gb AAX95135.1  DnaJ protein, putative [Oryza sativa (japonica cultivar-group)]                                                                                                                                                                                                                                                                                                                                 | 417   | 2E-30   |
|                       |                 |                     |                          |                     | >gb AAU89194.1  DnaJ protein, putative [Oryza sativa (japonica cultivar-group)]gb AAO72551.1  DNAJ-like protein [Oryza sativa (japonica cultivar-group)]                                                                                                                                                                                                                                                        | 413   | 2E-28   |
|                       |                 |                     |                          |                     | >emb CAA47925.1  cs DnaJ-1 [Cucumis sativus]sp Q04960 DNJH_CUCSA DnaJ protein homolog (DNAJ-1)                                                                                                                                                                                                                                                                                                                  | 419   | 4E-28   |
|                       |                 |                     |                          |                     | >emb CAA63965.1  DnaJ protein [Solanum tuberosum]                                                                                                                                                                                                                                                                                                                                                               | 197   | 4E-29   |
| CD058646              | 1.04E-02        | Mo17<B73=F1         | 1.23                     | 10                  | >ref XP_475776.1  putative GTPase [Oryza sativa (japonica cultivar-group)]gb AAT39219.1  putative GTPase [Oryza sativa (japonica cultivar-group)]                                                                                                                                                                                                                                                               | 207   | 7E-24   |
|                       |                 |                     |                          |                     | >dbj BAD87568.1  putative rab7 protein [Oryza sativa (japonica cultivar-group)]                                                                                                                                                                                                                                                                                                                                 | 198   | 7E-24   |
|                       |                 |                     |                          |                     | >ref NP_916633.1  putative RAB7A protein (GTP-binding protein) [Oryza sativa(japonica cultivar-group)]                                                                                                                                                                                                                                                                                                          | 205   | 3E-23   |
|                       |                 |                     |                          |                     | >emb CAA98168.1  RAB7A [Lotus corniculatus var. japonicus]                                                                                                                                                                                                                                                                                                                                                      | 206   | 2E-22   |
|                       |                 |                     |                          |                     | >sp Q41640 RAB7_VIGAC Ras-related protein Rab7gb AAA34242.1  Rab7p                                                                                                                                                                                                                                                                                                                                              | 146   | 9E-72   |
| CD573374              | 1.05E-02        | Mo17<B73=F1         | 1.25                     | 10                  | >ref XP_468756.1  putative ribosomal protein S19 [Oryza sativa (japonica cultivar-group)] ref XP_468752.1  putative ribosomal protein S19 [Oryza sativa (japonica cultivar-group)] gb AAP20855.1  putative ribosomal protein S19 [Oryza sativa (japonica cultivar-group)] gb AAP20842.1  putative ribosomal protein S19 [Oryza sativa (japonica cultivar-group)] sp P40978 RS19_ORYSA 40S ribosomal protein S19 | 144   | 5E-69   |
|                       |                 |                     |                          |                     | >gb AAW34237.1  putative ribosomal protein S19 [Oryza sativa (japonica cultivar-group)]                                                                                                                                                                                                                                                                                                                         | 166   | 3E-68   |
|                       |                 |                     |                          |                     | >gb AAW34236.1  putative ribosomal protein S19 [Oryza sativa (japonica cultivar-group)]                                                                                                                                                                                                                                                                                                                         | 122   | 5E-64   |
|                       |                 |                     |                          |                     | >gb AAW34240.1  putative ribosomal protein S19 [Oryza sativa (japonica cultivar-group)]                                                                                                                                                                                                                                                                                                                         | 143   | 5E-58   |
|                       |                 |                     |                          |                     | >gb ABB87116.1  40S ribosomal protein S19-like [Solanum tuberosum]                                                                                                                                                                                                                                                                                                                                              | 522   | 1E-54   |
| DV621401              | 1.05E-02        | B73=F1<Mo17         | 1.36                     | 4                   | >gb AAT85043.1  expressed protein [Oryza sativa (japonica cultivar-group)]gb AAR87334.1  expressed protein [Oryza sativa (japonica cultivar-group)]                                                                                                                                                                                                                                                             | 527   | 2E-49   |
|                       |                 |                     |                          |                     | >ref XP_476441.1  PRLI-interacting factor G-like protein [Oryza sativa (japonica cultivar-group)] dbj BAC83795.1  PRLI-interacting factor G-like protein [Oryza sativa (japonica cultivar-group)]                                                                                                                                                                                                               | 520   | 2E-45   |
|                       |                 |                     |                          |                     | >ref NP_190647.1  unknown protein [Arabidopsis thaliana]emb CAB42907.1  putative protein [Arabidopsis thaliana] gb AAO50646.1  unknown protein [Arabidopsis thaliana] gb AAO22779.1  unknown protein [Arabidopsis thaliana]                                                                                                                                                                                     | 603   | 7E-43   |
|                       |                 |                     |                          |                     | >gb ABA99196.1  hypothetical protein LOC_Os12g40480 [Oryza sativa (japonica cultivar-group)]                                                                                                                                                                                                                                                                                                                    | 533   | 2E-25   |
|                       |                 |                     |                          |                     | >ref XP_473629.1  OSJNBa0011J08.25 [Oryza sativa (japonica cultivar-group)]emb CAE03270.1  OSJNBa0011J08.25 [Oryza sativa (japonica cultivar-group)]                                                                                                                                                                                                                                                            | 199   | 3E-72   |
|                       |                 |                     |                          |                     | emb CAD41158.2  OSJNBa0064M23.3 [Oryza sativa (japonica cultivar-group)]                                                                                                                                                                                                                                                                                                                                        | 200   | 1E-70   |
| CB351548              | 1.05E-02        | Mo17<B73=F1         | 1.18                     | 11                  | >gb ABA93723.1  ribosomal protein S7 [Oryza sativa (japonica cultivar-group)]                                                                                                                                                                                                                                                                                                                                   | 207   | 3E-67   |
|                       |                 |                     |                          |                     | >ref NP_908322.1  putative 40S ribosomal protein S5 [Oryza sativa (japonica cultivar-group)] dbj BAB64234.1  putative 40S ribosomal protein S5 [Oryza sativa (japonica cultivar-group)] dbj BAB62621.1  putative 40S ribosomal protein S5 [Oryza sativa (japonica cultivar-group)]                                                                                                                              | 197   | 7E-67   |
|                       |                 |                     |                          |                     | >ref NP_187800.1  ATRPS5A (RIBOSOMAL PROTEIN 5A); structural constituent of ribosome [Arabidopsis thaliana] ref NP_850564.1  ATRPS5A (RIBOSOMAL PROTEIN 5A); structural constituent of ribosome [Arabidopsis thaliana] gb AAF23210.1  putative 40S ribosomal protein S5 [Arabidopsis thaliana]                                                                                                                  | 207   | 3E-67   |
|                       |                 |                     |                          |                     | gb AAM14315.1  putative 40S ribosomal protein S5 [Arabidopsis thaliana] gb AAK76520.1  putative 40S ribosomal protein S5 [Arabidopsis thaliana]                                                                                                                                                                                                                                                                 | 197   | 7E-67   |
|                       |                 |                     |                          |                     | gb AAM64502.1  40S ribosomal protein S5, putative [Arabidopsis thaliana] dbj BAB03103.1  40S ribosomal protein S5-like [Arabidopsis thaliana]                                                                                                                                                                                                                                                                   | 207   | 3E-67   |
|                       |                 |                     |                          |                     | sp P51427 RS5B_ARATH 40S ribosomal protein S5-2                                                                                                                                                                                                                                                                                                                                                                 | 197   | 7E-67   |
|                       |                 |                     |                          |                     | >emb CAA06491.1  40S ribosomal protein S5 [Cicer arietinum]sp O65731 RS5_CICAR 40S ribosomal protein S5                                                                                                                                                                                                                                                                                                         | 207   | 9E-67   |
|                       |                 |                     |                          |                     | >ref NP_181264.1  ATRPS5B (RIBOSOMAL PROTEIN 5B); structural constituent of ribosome [Arabidopsis thaliana] ref NP_001031502.1  ATRPS5B (RIBOSOMAL PROTEIN 5B); structural constituent of ribosome [Arabidopsis thaliana] gb AAC98068.1  40S ribosomal protein S5 [Arabidopsis thaliana]                                                                                                                        | 207   | 9E-67   |
|                       |                 |                     |                          |                     | gb AAM10231.1  40S ribosomal protein S5 [Arabidopsis thaliana] gb AAL24331.1  40S ribosomal protein S5 [Arabidopsis thaliana] sp Q9ZUT9 RS5A_ARATH 40S ribosomal protein S5-1                                                                                                                                                                                                                                   | 207   | 9E-67   |
| CB334480              | 1.06E-02        | Mo17<B73=F1         | 1.34                     | 10                  | ns                                                                                                                                                                                                                                                                                                                                                                                                              | 235   | 2E-13   |
| BM073216              | 1.06E-02        | F1=Mo17<B73         | 2.06                     | 9                   | >ref XP_468825.1  hypothetical protein [Oryza sativa (japonica cultivar-group)]gb AAS07307.1  hypothetical protein [Oryza sativa (japonica cultivar-group)]                                                                                                                                                                                                                                                     | 446   | 5E-12   |
|                       |                 |                     |                          |                     | >gb AAT93896.1  unknown protein [Oryza sativa (japonica cultivar-group)]                                                                                                                                                                                                                                                                                                                                        | 301   | 5E-12   |
|                       |                 |                     |                          |                     | >dbj BAD88282.1  ribosomal protein-like [Oryza sativa (japonica cultivar-group)]dbj BAD88086.1  ribosomal protein-like [Oryza sativa (japonica cultivar-group)]                                                                                                                                                                                                                                                 | 428   | 5E-12   |
|                       |                 |                     |                          |                     | >ref XP_550394.1  ribosomal protein-like [Oryza sativa (japonica cultivar-group)]dbj BAD68081.1  ribosomal protein-like [Oryza sativa (japonica cultivar-group)]                                                                                                                                                                                                                                                | 916   | 5E-12   |
|                       |                 |                     |                          |                     | dbj BAD67842.1  ribosomal protein-like [Oryza sativa (japonica cultivar-group)]                                                                                                                                                                                                                                                                                                                                 |       |         |
|                       |                 |                     |                          |                     | >ref XP_450358.1  ribosomal protein-like [Oryza sativa (japonica cultivar-group)]dbj BAD23759.1  ribosomal protein-like [Oryza sativa (japonica cultivar-group)]                                                                                                                                                                                                                                                |       |         |
| BM335915              | 1.06E-02        | B73<F1=Mo17         | 1.39                     | 3                   | ns                                                                                                                                                                                                                                                                                                                                                                                                              |       |         |
| BM347523              | 1.06E-02        | F1=Mo17<B73         | 1.52                     | 8                   | ns                                                                                                                                                                                                                                                                                                                                                                                                              |       |         |
| CB329767              | 1.06E-02        | Mo17<B73=F1         | 1.39                     | 10                  | >ref XP_481131.1  unknown protein [Oryza sativa (japonica cultivar-group)]dbj BAC99929.1  unknown protein [Oryza sativa (japonica cultivar-group)]                                                                                                                                                                                                                                                              | 97    | 3E-13   |

**Table 4. Microarray analysis results, mode of gene action classification, and BLAST annotation for the 1,367 ESTs identified as differentially expressed among genotypes (15% FDR)**

| GenBank accession no. | Overall P value | Significant pattern | Fold change <sup>†</sup> | Sector <sup>‡</sup> | BLAST annotation*                                                                                                                                                                                                                                                                                                                                                                                                                               | Score | E value |
|-----------------------|-----------------|---------------------|--------------------------|---------------------|-------------------------------------------------------------------------------------------------------------------------------------------------------------------------------------------------------------------------------------------------------------------------------------------------------------------------------------------------------------------------------------------------------------------------------------------------|-------|---------|
|                       |                 |                     |                          |                     | >ref NP_563992.1  unknown protein [Arabidopsis thaliana]gb AAL34239.1  unknown protein [Arabidopsis thaliana] gb AAK44064.1  unknown protein [Arabidopsis thaliana] gb AAM64726.1  unknown [Arabidopsis thaliana]                                                                                                                                                                                                                               | 92    | 5E-7    |
|                       |                 |                     |                          |                     | >gb AAF18514.1  ESTs gb T41688, gb AI992698, gb AA394805 come from this gene.[Arabidopsis thaliana]                                                                                                                                                                                                                                                                                                                                             | 123   | 5E-7    |
|                       |                 |                     |                          |                     | >ref NP_565217.1  unknown protein [Arabidopsis thaliana]gb AAL31128.1  At1g79660/F20B17_9 [Arabidopsis thaliana] gb AAK97713.1  At1g79660/F20B17_9 [Arabidopsis thaliana] gb AAF68107.1  F20B17.9 [Arabidopsis thaliana]                                                                                                                                                                                                                        | 93    | 2E-6    |
| DV491868              | 1.06E-02        | Mo17<B73            | 1.65                     | 10                  | >gb ABA94623.1  Zinc finger, C3HC4 type, putative [Oryza sativa (japonica cultivar-group)]                                                                                                                                                                                                                                                                                                                                                      | 325   | 5E-39   |
|                       |                 |                     |                          |                     | >ref NP_179802.2  protein binding / ubiquitin-protein ligase/ zinc ion binding[Arabidopsis thaliana] gb AAO50515.1  unknown protein [Arabidopsis thaliana]                                                                                                                                                                                                                                                                                      | 324   | 4E-32   |
|                       |                 |                     |                          |                     | gb AAO42065.1  unknown protein [Arabidopsis thaliana]                                                                                                                                                                                                                                                                                                                                                                                           | 252   | 1E-24   |
|                       |                 |                     |                          |                     | >gb AAD25813.1  hypothetical protein [Arabidopsis thaliana]                                                                                                                                                                                                                                                                                                                                                                                     | 320   | 2E-13   |
|                       |                 |                     |                          |                     | >gb AAM65602.1  unknown [Arabidopsis thaliana]                                                                                                                                                                                                                                                                                                                                                                                                  | 281   | 2E-13   |
|                       |                 |                     |                          |                     | >gb AAB65494.1  hypothetical protein; 51018-49636 [Arabidopsis thaliana]                                                                                                                                                                                                                                                                                                                                                                        | 374   | 2E-50   |
| DV489540              | 1.07E-02        | B73=F1<Mo17         | 1.38                     | 5                   | >ref XP_475676.1  unknown protein [Oryza sativa (japonica cultivar-group)]gb AAT44270.1  unknown protein [Oryza sativa (japonica cultivar-group)]                                                                                                                                                                                                                                                                                               | 407   | 2E-18   |
|                       |                 |                     |                          |                     | >gb ABA99826.1  DNA binding protein, putative [Oryza sativa (japonica cultivar-group)]                                                                                                                                                                                                                                                                                                                                                          | 400   | 2E-6    |
|                       |                 |                     |                          |                     | >gb AAU10684.1  hypothetical protein [Oryza sativa (japonica cultivar-group)]                                                                                                                                                                                                                                                                                                                                                                   | 461   | 2E-6    |
|                       |                 |                     |                          |                     | >ref XP_472829.1  OSJNBa0089K21.9 [Oryza sativa (japonica cultivar-group)]emb CAE03055.2  OSJNBa0089K21.9 [Oryza sativa (japonica cultivar-group)]                                                                                                                                                                                                                                                                                              | 481   | 6E-6    |
|                       |                 |                     |                          |                     | >ref NP_921846.1  hypothetical protein [Oryza sativa (japonica cultivar-group)]gb AAM93719.1  hypothetical protein [Oryza sativa (japonica cultivar-group)]                                                                                                                                                                                                                                                                                     |       |         |
|                       |                 |                     |                          |                     | gb AAP54133.1  transposon protein, putative, CACTA, En/Spm sub-class [Oryza sativa (japonica cultivar-group)]                                                                                                                                                                                                                                                                                                                                   |       |         |
| BM349922              | 1.07E-02        | B73<F1=Mo17         | 1.46                     | 3                   | ns                                                                                                                                                                                                                                                                                                                                                                                                                                              |       |         |
| DV621170              | 1.08E-02        | B73=F1<Mo17         | 1.41                     | 4                   | >gb AAP80862.1  Emr1 [Triticum aestivum]                                                                                                                                                                                                                                                                                                                                                                                                        | 304   | 3E-11   |
|                       |                 |                     |                          |                     | >gb ABA96655.1  Emr1 [Oryza sativa (japonica cultivar-group)]                                                                                                                                                                                                                                                                                                                                                                                   | 609   | 2E-9    |
|                       |                 |                     |                          |                     | >gb ABA96656.1  Emr1 [Oryza sativa (japonica cultivar-group)]                                                                                                                                                                                                                                                                                                                                                                                   | 682   | 6E-8    |
| DV621981              | 1.08E-02        | B73<Mo17            | 1.24                     | 3                   | >ref XP_474268.1  OSJNBa0043A12.5 [Oryza sativa (japonica cultivar-group)]emb CAE02800.1  OSJNBa0043A12.5 [Oryza sativa (japonica cultivar-group)]                                                                                                                                                                                                                                                                                              | 484   | 2E-46   |
|                       |                 |                     |                          |                     | >ref NP_568836.2  ATARP8 (ACTIN-RELATED PROTEIN 8); structural constituent ofcytoskeleton [Arabidopsis thaliana] gb AAM53248.1  actin-related protein 8B [Arabidopsis thaliana] tpg DAA00031.1  TPA: actin-related protein 8B; AtARP8B [Arabidopsis thaliana] dbj BAB09300.1  unnamed protein product [Arabidopsis thaliana]                                                                                                                    | 471   | 4E-32   |
|                       |                 |                     |                          |                     | >gb AAO49331.1  actin [Oxyrrhis marina]                                                                                                                                                                                                                                                                                                                                                                                                         | 244   | 6E-8    |
|                       |                 |                     |                          |                     | >ref XP_656610.1  actin [Entamoeba histolytica HM-1:IMSS]gb EAL51224.1  actin [Entamoeba histolytica HM-1:IMSS]                                                                                                                                                                                                                                                                                                                                 | 294   | 1E-7    |
|                       |                 |                     |                          |                     | >gb AAA29085.1  actin protein                                                                                                                                                                                                                                                                                                                                                                                                                   | 373   | 1E-7    |
| CB885939              | 1.08E-02        | B73<Mo17            | 1.41                     | 3                   | >emb CAA69075.1  S-adenosylmethionine decarboxylase [Zea mays]sp O24575 DCAM_MAIZE S-adenosylmethionine decarboxylase proenzyme (AdoMetDC) (SamDC) [Contains: S-adenosylmethionine decarboxylase alpha chain; S-adenosylmethionine decarboxylase beta chain]                                                                                                                                                                                    | 400   | 2E-66   |
|                       |                 |                     |                          |                     | >emb CAA58762.1  S-adenosylmethionine decarboxylase [Triticum turgidum subsp. durumx Hordeum chilense] sp Q42829 DCAM_HORCH S-adenosylmethionine decarboxylase proenzyme (AdoMetDC) (SamDC) [Contains: S-adenosylmethionine decarboxylase alpha chain; S-adenosylmethionine decarboxylase beta chain]                                                                                                                                           | 393   | 3E-40   |
|                       |                 |                     |                          |                     | >gb AAD17232.1  S-adenosylmethionine decarboxylase precursor [Triticum aestivum]                                                                                                                                                                                                                                                                                                                                                                | 392   | 2E-39   |
|                       |                 |                     |                          |                     | >ref XP_473046.1  OSJNBa0067K08.23 [Oryza sativa (japonica cultivar-group)]emb CAA69074.2  S-adenosylmethionine decarboxylase [Oryza sativa (japonica cultivar-group)] emb CAD41242.2  OSJNBa0067K08.23 [Oryza sativa (japonica cultivar-group)] sp O24215 DCAM_ORYSA S-adenosylmethionine decarboxylase proenzyme (AdoMetDC) (SamDC) [Contains: S-adenosylmethionine decarboxylase alpha chain; S-adenosylmethionine decarboxylase beta chain] | 398   | 7E-39   |
|                       |                 |                     |                          |                     | >emb CAD41510.3  OSJNBa0029H02.4 [Oryza sativa (japonica cultivar-group)]                                                                                                                                                                                                                                                                                                                                                                       | 450   | 7E-39   |
| CD568840              | 1.09E-02        | B73<F1=Mo17         | 1.45                     | 3                   | >ref XP_477068.1  putative DD1A protein [Oryza sativa (japonica cultivar-group)]dbj BAC83228.1  putative DD1A protein [Oryza sativa (japonica cultivar-group)]                                                                                                                                                                                                                                                                                  | 408   | 4E-29   |
|                       |                 |                     |                          |                     | >ref XP_478799.1  putative carboxyl-terminal proteinase [Oryza sativa (japonica cultivar-group)] ref XP_507376.1  PREDICTED OJ1699_E05.18 gene product [Oryza sativa (japonica cultivar-group)] ref XP_506420.1  PREDICTED OJ1699_E05.18 gene product [Oryza sativa (japonica cultivar-group)] dbj BAC83152.1  putative carboxyl-terminal proteinase [Oryza sativa (japonica cultivar-group)]                                                   | 430   | 8E-28   |
|                       |                 |                     |                          |                     | >ref XP_470030.1  unknown protein [Oryza sativa (japonica cultivar-group)]gb AAP21432.1  unknown protein [Oryza sativa (japonica cultivar-group)]                                                                                                                                                                                                                                                                                               | 410   | 5E-27   |
|                       |                 |                     |                          |                     | >gb AAW38991.1  At1g55360 [Arabidopsis thaliana]ref NP_175933.1  unknown protein [Arabidopsis thaliana] gb AAN60240.1  unknown [Arabidopsis thaliana]                                                                                                                                                                                                                                                                                           | 422   | 9E-27   |
|                       |                 |                     |                          |                     | gb AAG51562.1  unknown protein; 9920-11896 [Arabidopsis thaliana]                                                                                                                                                                                                                                                                                                                                                                               | 419   | 5E-26   |
|                       |                 |                     |                          |                     | >gb AAM65243.1  putative carboxyl-terminal peptidase [Arabidopsis thaliana]                                                                                                                                                                                                                                                                                                                                                                     | 209   | 8E-26   |
| DV490125              | 1.09E-02        | F1=Mo17<B73         | 1.54                     | 9                   | >gb ABA94173.1  Maf-like protein [Oryza sativa (japonica cultivar-group)]                                                                                                                                                                                                                                                                                                                                                                       | 211   | 3E-25   |
|                       |                 |                     |                          |                     | >gb ABA94182.1  Maf-like protein [Oryza sativa (japonica cultivar-group)]                                                                                                                                                                                                                                                                                                                                                                       |       |         |
|                       |                 |                     |                          |                     | >ref XP_470606.1  Unknown protein [Oryza sativa (japonica cultivar-group)]gb AAO6956.1  Unknown protein [Oryza sativa (japonica cultivar-group)]                                                                                                                                                                                                                                                                                                | 359   | 1E-17   |
|                       |                 |                     |                          |                     | gb AAO00680.1  Unknown protein [Oryza sativa (japonica cultivar-group)]                                                                                                                                                                                                                                                                                                                                                                         | 123   | 1E-15   |
|                       |                 |                     |                          |                     | >gb AAM91161.1  unknown protein [Arabidopsis thaliana]gb AAM13078.1  unknown protein [Arabidopsis thaliana]                                                                                                                                                                                                                                                                                                                                     | 208   | 1E-15   |
|                       |                 |                     |                          |                     | >dbj BAB10633.1  unnamed protein product [Arabidopsis thaliana]                                                                                                                                                                                                                                                                                                                                                                                 |       |         |
| DV495000              | 1.09E-02        | Mo17<B73=F1         | 1.62                     | 11                  | ns                                                                                                                                                                                                                                                                                                                                                                                                                                              |       |         |

**Table 4. Microarray analysis results, mode of gene action classification, and BLAST annotation for the 1,367 ESTs identified as differentially expressed among genotypes (15% FDR)**

| GenBank accession no. | Overall P value | Significant pattern | Fold change <sup>±</sup> | Sector <sup>±</sup> | BLAST annotation*                                                                                                                                                                                                                                                                                                                                                                                                                                                                                           | Score | E value |
|-----------------------|-----------------|---------------------|--------------------------|---------------------|-------------------------------------------------------------------------------------------------------------------------------------------------------------------------------------------------------------------------------------------------------------------------------------------------------------------------------------------------------------------------------------------------------------------------------------------------------------------------------------------------------------|-------|---------|
| DV943069              | 1.10E-02        | F1<Mo17             | 1.67                     | 5                   | >dbj BAD28046.1  putative Helicase SKI2W [Oryza sativa (japonica cultivar-group)]                                                                                                                                                                                                                                                                                                                                                                                                                           | 1281  | e-107   |
|                       |                 |                     |                          |                     | >emb CAB61942.1  putative helicase [Arabidopsis thaliana]                                                                                                                                                                                                                                                                                                                                                                                                                                                   | 1347  | 2E-93   |
|                       |                 |                     |                          |                     | >emb CAB51169.1  putative helicase, fragment [Arabidopsis thaliana]                                                                                                                                                                                                                                                                                                                                                                                                                                         | 705   | 2E-93   |
|                       |                 |                     |                          |                     | >ref NP_190280.2  ATP binding / ATP-dependent helicase/ helicase/ nucleic acid binding [Arabidopsis thaliana]                                                                                                                                                                                                                                                                                                                                                                                               | 1338  | 2E-93   |
|                       |                 |                     |                          |                     | >ref XP_642686.1  hypothetical protein DDB0169070 [Dictyostelium discoideum]gb AAO51181.1  similar to putative DEAD/DEAH box helicase [Schizosaccharomyces pombe] [Dictyostelium discoideum] gb EAL68791.1  hypothetical protein DDB0169070 [Dictyostelium discoideum]                                                                                                                                                                                                                                      | 1378  | 1E-54   |
| CB815632              | 1.10E-02        | Mo17<B73=F1         | 2.38                     | 10                  | >gb AAX92995.1  hypothetical protein LOC_Os11g06760 [Oryza sativa (japonica cultivar-group)] gb ABA91587.1  hypothetical protein LOC_Os11g06760 [Oryza sativa (japonica cultivar-group)]                                                                                                                                                                                                                                                                                                                    | 302   | 4E-61   |
|                       |                 |                     |                          |                     | >ref XP_472494.1  OSJNBa0042L16.4 [Oryza sativa (japonica cultivar-group)]emb CAD41015.3  OSJNBa0042L16.6 [Oryza sativa (japonica cultivar-group)]                                                                                                                                                                                                                                                                                                                                                          | 262   | 7E-50   |
|                       |                 |                     |                          |                     | >dbj BAD46594.1  unknown protein [Oryza sativa (japonica cultivar-group)]                                                                                                                                                                                                                                                                                                                                                                                                                                   | 269   | 1E-48   |
|                       |                 |                     |                          |                     | >dbj BAC79194.1  chloroplast nucleoid DNA-binding protein -like protein [Oryza sativa (japonica cultivar-group)]                                                                                                                                                                                                                                                                                                                                                                                            | 732   | 1E-48   |
|                       |                 |                     |                          |                     | >dbj BAE71254.1  hypothetical protein [Trifolium pratense]                                                                                                                                                                                                                                                                                                                                                                                                                                                  | 248   | 7E-48   |
| DV551377              | 1.10E-02        | Mo17<B73=F1         | 1.33                     | 10                  | >ref NP_912417.1  hypothetical protein [Oryza sativa (japonica cultivar-group)]gb AAP06860.1  hypothetical protein [Oryza sativa (japonica cultivar-group)]                                                                                                                                                                                                                                                                                                                                                 | 117   | 4E-16   |
|                       |                 |                     |                          |                     | >ref NP_192563.2  unknown protein [Arabidopsis thaliana]gb AAN15541.1  unknown protein [Arabidopsis thaliana] gb AAL62398.1  unknown protein [Arabidopsis thaliana]                                                                                                                                                                                                                                                                                                                                         | 113   | 2E-9    |
| CB833624              | 1.10E-02        | Mo17<B73=F1         | 1.37                     | 10                  | ns                                                                                                                                                                                                                                                                                                                                                                                                                                                                                                          |       |         |
| CD485180              | 1.11E-02        | B73<F1=Mo17         | 1.3                      | 3                   | >gb AAX95841.1  probable zinc finger protein - alfalfa (fragment) [Oryza sativa (japonica cultivar-group)] gb AAX92933.1  probable zinc finger protein - alfalfa (fragment) [Oryza sativa (japonica cultivar-group)] gb ABA92392.1  zinc finger protein, putative [Oryza sativa (japonica cultivar-group)]                                                                                                                                                                                                  | 264   | 4E-48   |
|                       |                 |                     |                          |                     | >gb AAV25644.1  putative nucleic acid binding protein [Oryza sativa (japonica cultivar-group)]                                                                                                                                                                                                                                                                                                                                                                                                              | 258   | 5E-47   |
|                       |                 |                     |                          |                     | >ref NP_915084.1  nucleic acid binding protein [Oryza sativa (japonica cultivar-group)] dbj BAD82135.1  nucleic acid binding protein [Oryza sativa (japonica cultivar-group)] dbj BAB92630.1  nucleic acid binding protein [Oryza sativa (japonica cultivar-group)] gb AAC98969.1  nucleic acid binding protein [Oryza sativa (japonica cultivar-group)]                                                                                                                                                    | 272   | 3E-46   |
|                       |                 |                     |                          |                     | >gb AAC98962.1  nucleic acid binding protein [Oryza sativa (japonica cultivar-group)]                                                                                                                                                                                                                                                                                                                                                                                                                       | 271   | 3E-46   |
|                       |                 |                     |                          |                     | >ref XP_466276.1  putative nucleic acid binding protein [Oryza sativa (japonica cultivar-group)] ref XP_506831.1  PREDICTED OJ1712_E04.22 gene product [Oryza sativa (japonica cultivar-group)] dbj BAD15814.1  putative nucleic acid binding protein [Oryza sativa (japonica cultivar-group)] dbj BAD15587.1  putative nucleic acid binding protein [Oryza sativa (japonica cultivar-group)]                                                                                                               | 267   | 1E-45   |
|                       |                 |                     |                          |                     | >ref XP_483065.1  putative heat-shock protein [Oryza sativa (japonica cultivar-group)] dbj BAD09415.1  putative heat-shock protein [Oryza sativa (japonica cultivar-group)]                                                                                                                                                                                                                                                                                                                                 | 785   | e-101   |
|                       |                 |                     |                          |                     | >emb CAA82945.1  heat-shock protein [Secale cereale]                                                                                                                                                                                                                                                                                                                                                                                                                                                        | 781   | 3E-98   |
| CD001840              | 1.11E-02        | F1=Mo17<B73         | 1.24                     | 8                   | >gb AAM19795.1  At2g04030/F3C11.14 [Arabidopsis thaliana]                                                                                                                                                                                                                                                                                                                                                                                                                                                   | 780   | 5E-95   |
|                       |                 |                     |                          |                     | >ref NP_178487.1  CR88; ATP binding / unfolded protein binding [Arabidopsis thaliana]gb AAD32922.1  putative heat shock protein [Arabidopsis thaliana] gb AAL32008.1  At2g04030/F3C11.14 [Arabidopsis thaliana] gb AAK96633.1  At2g04030/F3C11.14 [Arabidopsis thaliana] gb AAN72245.1  At2g04030/F3C11.14 [Arabidopsis thaliana]                                                                                                                                                                           | 780   | 5E-95   |
|                       |                 |                     |                          |                     | >emb CAA72515.1  heat shock protein [Arabidopsis thaliana]                                                                                                                                                                                                                                                                                                                                                                                                                                                  | 768   | 1E-92   |
|                       |                 |                     |                          |                     | >emb CAA05772.1  Ubiquitin carrier protein [Zea mays]                                                                                                                                                                                                                                                                                                                                                                                                                                                       | 169   | 3E-33   |
|                       |                 |                     |                          |                     | >ref XP_475366.1  putative ubiquitin-conjugating enzyme E2 [Oryza sativa (japonica cultivar-group)] gb AAT39166.1  putative ubiquitin-conjugating enzyme E2 [Oryza sativa (japonica cultivar-group)]                                                                                                                                                                                                                                                                                                        | 169   | 7E-33   |
| CD651489              | 1.12E-02        | B73<F1=Mo17         | 1.3                      | 3                   | >gb AAC12662.1  ubiquitin-conjugating enzyme protein E2 [Zea mays]                                                                                                                                                                                                                                                                                                                                                                                                                                          | 169   | 7E-33   |
|                       |                 |                     |                          |                     | >ref NP_915413.1  putative Ubiquitin carrier protein UBC7 [Oryza sativa (japonica cultivar-group)] dbj BAB93210.1  putative ubiquitin carrier protein UBC7 [Oryza sativa (japonica cultivar-group)] dbj BAB67890.1  putative ubiquitin carrier protein UBC7 [Oryza sativa (japonica cultivar-group)]                                                                                                                                                                                                        | 169   | 1E-32   |
|                       |                 |                     |                          |                     | >sp P25868 UBC7 WHEAT Ubiquitin-conjugating enzyme E2 7 (Ubiquitin-protein ligase 7)(Ubiquitin carrier protein 7)                                                                                                                                                                                                                                                                                                                                                                                           | 168   | 1E-30   |
|                       |                 |                     |                          |                     | >ref XP_482897.1  putative zinc-finger protein [Oryza sativa (japonica cultivar-group)] dbj BAD09868.1  putative zinc-finger protein [Oryza sativa (japonica cultivar-group)]                                                                                                                                                                                                                                                                                                                               | 501   | 3E-97   |
|                       |                 |                     |                          |                     | >ref NP_198550.3  protein binding / zinc ion binding [Arabidopsis thaliana]                                                                                                                                                                                                                                                                                                                                                                                                                                 | 493   | 2E-69   |
|                       |                 |                     |                          |                     | >gb AAM62849.1  zinc finger protein-like [Arabidopsis thaliana]                                                                                                                                                                                                                                                                                                                                                                                                                                             | 493   | 9E-69   |
|                       |                 |                     |                          |                     | >gb AAO42806.1  At5g22480 [Arabidopsis thaliana]                                                                                                                                                                                                                                                                                                                                                                                                                                                            | 493   | 9E-69   |
| CB280852              | 1.12E-02        | Mo17<B73            | 1.35                     | 10                  | >ref NP_197640.1  protein binding / zinc ion binding [Arabidopsis thaliana]                                                                                                                                                                                                                                                                                                                                                                                                                                 | 493   | 9E-69   |
|                       |                 |                     |                          |                     | >ref XP_475493.1  putative protein translation factor Sui1 [Oryza sativa (japonica cultivar-group)] gb AAT44286.1  putative protein translation factor Sui1 [Oryza sativa (japonica cultivar-group)]                                                                                                                                                                                                                                                                                                        | 115   | 6E-59   |
|                       |                 |                     |                          |                     | >dbj BAD53005.1  putative translation initiation factor [Oryza sativa (japonica cultivar-group)]                                                                                                                                                                                                                                                                                                                                                                                                            | 115   | 3E-56   |
|                       |                 |                     |                          |                     | >ref XP_478516.1  translational initiation factor eIF1 [Oryza sativa (japonica cultivar-group)] emb CAA36190.1  GOS2 [Oryza sativa (indica cultivar-group)] gb AAK56324.1  translational initiation factor eIF1 [Porteresia coarctata] dbj BAC45143.1  translational initiation factor eIF1 [Oryza sativa (japonica cultivar-group)] gb AAC67556.1  translation initiation factor [Oryza sativa] pir S21636 GOS2 protein - rice sp P33278 SUI1_ORYSA PROTEIN TRANSLATION FACTOR SUI1 HOMOLOG (GOS2 PROTEIN) | 115   | 1E-54   |
|                       |                 |                     |                          |                     | >ref NP_197640.1  protein binding / zinc ion binding [Arabidopsis thaliana]                                                                                                                                                                                                                                                                                                                                                                                                                                 | 493   | 9E-69   |
| CB885428              | 1.12E-02        | Mo17<F1             | 1.33                     | 11                  | >ref XP_475493.1  putative protein translation factor Sui1 [Oryza sativa (japonica cultivar-group)] gb AAT44286.1  putative protein translation factor Sui1 [Oryza sativa (japonica cultivar-group)]                                                                                                                                                                                                                                                                                                        | 115   | 6E-59   |
|                       |                 |                     |                          |                     | >dbj BAD53005.1  putative translation initiation factor [Oryza sativa (japonica cultivar-group)]                                                                                                                                                                                                                                                                                                                                                                                                            | 115   | 3E-56   |
|                       |                 |                     |                          |                     | >ref XP_478516.1  translational initiation factor eIF1 [Oryza sativa (japonica cultivar-group)] emb CAA36190.1  GOS2 [Oryza sativa (indica cultivar-group)] gb AAK56324.1  translational initiation factor eIF1 [Porteresia coarctata] dbj BAC45143.1  translational initiation factor eIF1 [Oryza sativa (japonica cultivar-group)] gb AAC67556.1  translation initiation factor [Oryza sativa] pir S21636 GOS2 protein - rice sp P33278 SUI1_ORYSA PROTEIN TRANSLATION FACTOR SUI1 HOMOLOG (GOS2 PROTEIN) | 115   | 1E-54   |
|                       |                 |                     |                          |                     | >ref NP_197640.1  protein binding / zinc ion binding [Arabidopsis thaliana]                                                                                                                                                                                                                                                                                                                                                                                                                                 | 493   | 9E-69   |
|                       |                 |                     |                          |                     | >ref XP_475493.1  putative protein translation factor Sui1 [Oryza sativa (japonica cultivar-group)] gb AAT44286.1  putative protein translation factor Sui1 [Oryza sativa (japonica cultivar-group)]                                                                                                                                                                                                                                                                                                        | 115   | 6E-59   |

**Table 4. Microarray analysis results, mode of gene action classification, and BLAST annotation for the 1,367 ESTs identified as differentially expressed among genotypes (15% FDR)**

| GenBank accession no.                                                                                                                                                                                                        | Overall P value | Significant pattern | Fold change <sup>†</sup> | Sector <sup>‡</sup> | BLAST annotation*                                                                                                                                                                                                                                                                                                                                                                                                                                                               | Score | E value |
|------------------------------------------------------------------------------------------------------------------------------------------------------------------------------------------------------------------------------|-----------------|---------------------|--------------------------|---------------------|---------------------------------------------------------------------------------------------------------------------------------------------------------------------------------------------------------------------------------------------------------------------------------------------------------------------------------------------------------------------------------------------------------------------------------------------------------------------------------|-------|---------|
| CB411033                                                                                                                                                                                                                     | 1.12E-02        | Mo17<B73=F1         | 1.29                     | 11                  | >emb CAB61837.1  putative translation initiation factor eIF-1 [Sporobolusstapfianus] sp Q9SM41 SUI1 SPOST Protein translation factor SUI1 homolog                                                                                                                                                                                                                                                                                                                               | 115   | 3E-54   |
|                                                                                                                                                                                                                              |                 |                     |                          |                     | >sp P56330 SUI1 MAIZE Protein translation factor SUI1 homolog (GOS2 protein) gb AAB88615.1  translation initiation factor: GOS2 [Zea mays]                                                                                                                                                                                                                                                                                                                                      | 115   | 5E-54   |
|                                                                                                                                                                                                                              |                 |                     |                          |                     | >gb AAV36518.1  vacuolar ATPase subunit c isoform [Pennisetum glaucum] gb AAL08022.1  vacuolar H+-ATPase 16 kDa proteolipid subunit c [Pennisetum glaucum]                                                                                                                                                                                                                                                                                                                      | 165   | 7E-36   |
|                                                                                                                                                                                                                              |                 |                     |                          |                     | >gb AAK91135.1  V-ATPase subunit c [Porteresia coarctata] gb ABA95923.1  V-type ATPase, C subunit [Oryza sativa (japonica cultivar-group)]                                                                                                                                                                                                                                                                                                                                      | 165   | 7E-36   |
|                                                                                                                                                                                                                              |                 |                     |                          |                     | >gb AAAX93004.1  V-type ATPase, C subunit, putative [Oryza sativa (japonica cultivar-group)] sp Q40635 VATL_ORYSA Vacuolar ATP synthase 16 kDa proteolipid subunit  gb ABA91617.1  V-type ATPase, C subunit, putative [Oryza sativa (japonica cultivar-group)]  gb AAA68175.1  H+-ATPase                                                                                                                                                                                        | 165   | 7E-36   |
| BM073418                                                                                                                                                                                                                     | 1.12E-02        | Mo17<B73=F1         | 1.63                     | 11                  | >gb AAU44174.1  putative vacuolar ATP synthase 16 kDa proteolipid subunit [Oryzasativa (japonica cultivar-group)]                                                                                                                                                                                                                                                                                                                                                               | 166   | 2E-35   |
|                                                                                                                                                                                                                              |                 |                     |                          |                     | >ref XP_466150.1  putative Vacuolar ATP synthase 16 kDa proteolipid subunit [Oryzasativa (japonica cultivar-group)]  dbj BAD33262.1  putative Vacuolar ATP synthase 16 kDa proteolipid subunit [Oryza sativa (japonica cultivar-group)]  dbj BAD16200.1  putative Vacuolar ATP synthase 16 kDa proteolipid subunit [Oryza sativa (japonica cultivar-group)]                                                                                                                     | 167   | 2E-35   |
|                                                                                                                                                                                                                              |                 |                     |                          |                     | >ref XP_473347.1  OSJNBa0091D06.25 [Oryza sativa (japonica cultivar-group)] emb CAD41610.1  OSJNBa0091D06.25 [Oryza sativa (japonica cultivar-group)]                                                                                                                                                                                                                                                                                                                           | 220   | 2E-62   |
|                                                                                                                                                                                                                              |                 |                     |                          |                     | emb CAE02779.1  OSJNBa0011L07.3 [Oryza sativa (japonica cultivar-group)]                                                                                                                                                                                                                                                                                                                                                                                                        | 217   | 4E-49   |
|                                                                                                                                                                                                                              |                 |                     |                          |                     | >ref NP_001031804.1  unknown protein [Arabidopsis thaliana]                                                                                                                                                                                                                                                                                                                                                                                                                     | 673   | 1E-44   |
| CB604298                                                                                                                                                                                                                     | 1.12E-02        | F1=Mo17<B73         | 1.19                     | 9                   | >emb CAB80457.1  putative protein [Arabidopsis thaliana] emb CAB37532.1  putative protein [Arabidopsis thaliana]                                                                                                                                                                                                                                                                                                                                                                | 121   | 1E-23   |
|                                                                                                                                                                                                                              |                 |                     |                          |                     | >ref ZP_00107433.1  hypothetical protein Npun02006142 [Nostoc punctiforme PCC 73102]                                                                                                                                                                                                                                                                                                                                                                                            | 119   | 3E-23   |
|                                                                                                                                                                                                                              |                 |                     |                          |                     | >ref ZP_00517581.1  hypothetical protein CwatDRAFT_2236 [Crocospaera watsonii WH 8501] gb EAM49340.1  hypothetical protein CwatDRAFT_2236 [Crocospaera watsonii WH 8501]                                                                                                                                                                                                                                                                                                        | 305   | 1E-38   |
|                                                                                                                                                                                                                              |                 |                     |                          |                     | >ref XP_479167.1  putative 40S ribosomal protein [Oryza sativa (japonica cultivar-group)]  ref XP_507392.1  PREDICTED B1056G08.113 gene product [Oryza sativa (japonica cultivar-group)]  ref XP_507391.1  PREDICTED B1056G08.113 gene product [Oryza sativa (japonica cultivar-group)]  ref XP_506471.1  PREDICTED B1056G08.113 gene product [Oryza sativa (japonica cultivar-group)]  dbj BAC79991.1  putative 40S ribosomal protein [Oryza sativa (japonica cultivar-group)] | 310   | 7E-38   |
|                                                                                                                                                                                                                              |                 |                     |                          |                     | >ref XP_470555.1  Putative 40S Ribosomal protein [Oryza sativa] gb AAK92638.1  Putative 40S Ribosomal protein [Oryza sativa]                                                                                                                                                                                                                                                                                                                                                    | 332   | 6E-32   |
| CB334219                                                                                                                                                                                                                     | 1.12E-02        | Mo17<B73            | 1.21                     | 10                  | >sp O22518 RSSA SOYBN 40S ribosomal protein SA (p40) gb AAB82659.1  ribosome-associated protein p40 [Glycine max]                                                                                                                                                                                                                                                                                                                                                               | 280   | 6E-32   |
|                                                                                                                                                                                                                              |                 |                     |                          |                     | >ref NP_850515.1  RPSAB; structural constituent of ribosome [Arabidopsis thaliana]                                                                                                                                                                                                                                                                                                                                                                                              | 216   | 3E-57   |
|                                                                                                                                                                                                                              |                 |                     |                          |                     | >ref NP_187128.1  RPSAB; structural constituent of ribosome [Arabidopsis thaliana] gb AAF04903.1  putative 40S ribosomal protein [Arabidopsis thaliana]                                                                                                                                                                                                                                                                                                                         | 133   | 2E-56   |
|                                                                                                                                                                                                                              |                 |                     |                          |                     | sp Q8H173 RSSAB ARATH 40S ribosomal protein SA-2 (p40 protein homolog)  gb AAB67866.1  p40 protein homolog [Arabidopsis thaliana]                                                                                                                                                                                                                                                                                                                                               | 155   | 2E-56   |
|                                                                                                                                                                                                                              |                 |                     |                          |                     | >ref XP_483755.1  putative 60S ribosomal protein L10A (RPL10aC) [Oryza sativa(japonica cultivar-group)]  dbj BAD09090.1  putative 60S ribosomal protein L10A (RPL10aC) [Oryza sativa (japonica cultivar-group)]                                                                                                                                                                                                                                                                 | 216   | 9E-55   |
| CB380945                                                                                                                                                                                                                     | 1.14E-02        | Mo17<B73=F1         | 1.26                     | 10                  | >dbj BAD73824.1  putative Csa-19 [Oryza sativa (japonica cultivar-group)]                                                                                                                                                                                                                                                                                                                                                                                                       | 216   | 6E-54   |
|                                                                                                                                                                                                                              |                 |                     |                          |                     | >ref XP_483761.1  putative 60S ribosomal protein L10A (RPL10aC) [Oryza sativa(japonica cultivar-group)]  dbj BAD13131.1  putative 60S ribosomal protein L10A (RPL10aC) [Oryza sativa (japonica cultivar-group)]                                                                                                                                                                                                                                                                 | 425   | 5E-44   |
|                                                                                                                                                                                                                              |                 |                     |                          |                     | >dbj BAD28853.1  putative ribosomal protein L10a [Oryza sativa (japonica cultivar-group)]                                                                                                                                                                                                                                                                                                                                                                                       | 424   | 2E-33   |
|                                                                                                                                                                                                                              |                 |                     |                          |                     | >gb AAW50982.1  ribosomal protein L10A [Triticum aestivum]                                                                                                                                                                                                                                                                                                                                                                                                                      | 424   | 3E-33   |
|                                                                                                                                                                                                                              |                 |                     |                          |                     | ns                                                                                                                                                                                                                                                                                                                                                                                                                                                                              | 459   | 5E-28   |
| DV621482                                                                                                                                                                                                                     | 1.15E-02        | B73<F1=Mo17         | 1.21                     | 3                   | >dbj BAD29382.1  putative Ste24p [Oryza sativa (japonica cultivar-group)]                                                                                                                                                                                                                                                                                                                                                                                                       | 306   | 9E-9    |
|                                                                                                                                                                                                                              |                 |                     |                          |                     | >gb AAK39514.1  CaaX processing zinc-metallo endoprotease [Arabidopsis thaliana]                                                                                                                                                                                                                                                                                                                                                                                                | 304   | 2E-8    |
|                                                                                                                                                                                                                              |                 |                     |                          |                     | >ref NP_567212.1  ATSTE24 [Arabidopsis thaliana] gb AAL90896.1  AT4g01320/F2N1_21 [Arabidopsis thaliana]  gb AAP21163.1  At4g01320/F2N1_21 [Arabidopsis thaliana]                                                                                                                                                                                                                                                                                                               | 304   | 3E-8    |
|                                                                                                                                                                                                                              |                 |                     |                          |                     | >gb AAL07084.1  putative CAAX prenyl protease [Arabidopsis thaliana]                                                                                                                                                                                                                                                                                                                                                                                                            | 304   | 2E-7    |
|                                                                                                                                                                                                                              |                 |                     |                          |                     | >emb CAB80941.1  putative CAAX prenyl protease [Arabidopsis thaliana]                                                                                                                                                                                                                                                                                                                                                                                                           | 147   | 2E-7    |
| DV551153                                                                                                                                                                                                                     | 1.15E-02        | B73=F1<Mo17         | 1.23                     | 4                   | >gb ABA97248.1  jacalin homolog [Oryza sativa (japonica cultivar-group)] gb ABB51090.1  mannose-specific jacalin-related lectin [Oryza sativa (japonica cultivar-group)]                                                                                                                                                                                                                                                                                                        | 377   | e-132   |
|                                                                                                                                                                                                                              |                 |                     |                          |                     | >gb AAA87041.1  putative 32.6 kDa jasmonate-induced protein [Hordeum vulgare] gb AAB72096.1  32 kDa protein [Hordeum vulgare]                                                                                                                                                                                                                                                                                                                                                   | 377   | e-132   |
|                                                                                                                                                                                                                              |                 |                     |                          |                     | >gb AAA87042.1  putative 32.7 kDa jasmonate-induced protein [Hordeum vulgare] gb AAB72097.1  32 kDa protein [Hordeum vulgare]                                                                                                                                                                                                                                                                                                                                                   | 377   | e-132   |
|                                                                                                                                                                                                                              |                 |                     |                          |                     | >gb AAR20919.1  jasmonate-induced protein [Triticum aestivum]                                                                                                                                                                                                                                                                                                                                                                                                                   | 377   | e-132   |
|                                                                                                                                                                                                                              |                 |                     |                          |                     | >ref NP_909490.1  putative beta-glucosidase-aggregating factor [Oryza sativa] gb AAK55474.1  putative beta-glucosidase-aggregating factor [Oryza sativa (japonica cultivar-group)]                                                                                                                                                                                                                                                                                              | 377   | e-130   |
| >ref XP_469569.1  actin [Oryza sativa (japonica cultivar-group)] gb AAO38821.1  actin [Oryza sativa (japonica cultivar-group)]  dbj BAC76319.1  actin [Oryza sativa (japonica cultivar-group)]  sp P13362 ACT1 ORYSA Actin-1 |                 |                     |                          |                     |                                                                                                                                                                                                                                                                                                                                                                                                                                                                                 |       |         |
| >emb CAA55923.1  actin [Sorghum bicolor] sp P53504 ACT1 SORBI Actin-1                                                                                                                                                        |                 |                     |                          |                     |                                                                                                                                                                                                                                                                                                                                                                                                                                                                                 |       |         |
| >emb CAA33874.1  actin [Oryza sativa (indica cultivar-group)]                                                                                                                                                                |                 |                     |                          |                     |                                                                                                                                                                                                                                                                                                                                                                                                                                                                                 |       |         |
| >gb AAF40438.1  actin 1 [Avena nuda]                                                                                                                                                                                         |                 |                     |                          |                     |                                                                                                                                                                                                                                                                                                                                                                                                                                                                                 |       |         |

**Table 4. Microarray analysis results, mode of gene action classification, and BLAST annotation for the 1,367 ESTs identified as differentially expressed among genotypes (15% FDR)**

| GenBank accession no. | Overall P value | Significant pattern | Fold change <sup>±</sup> | Sector <sup>±</sup> | BLAST annotation*                                                                                                                                                                                                                                                                                                                                                                                                                                                                                                                                                                                                                                                                                                                                                                                                                                                                                                                                                                                                                                                                                                                                                                                                                                                                                                                                            | Score | E value |
|-----------------------|-----------------|---------------------|--------------------------|---------------------|--------------------------------------------------------------------------------------------------------------------------------------------------------------------------------------------------------------------------------------------------------------------------------------------------------------------------------------------------------------------------------------------------------------------------------------------------------------------------------------------------------------------------------------------------------------------------------------------------------------------------------------------------------------------------------------------------------------------------------------------------------------------------------------------------------------------------------------------------------------------------------------------------------------------------------------------------------------------------------------------------------------------------------------------------------------------------------------------------------------------------------------------------------------------------------------------------------------------------------------------------------------------------------------------------------------------------------------------------------------|-------|---------|
|                       |                 |                     |                          |                     | >emb CAA34356.1  unnamed protein product [Oryza sativa (indica cultivar-group)]                                                                                                                                                                                                                                                                                                                                                                                                                                                                                                                                                                                                                                                                                                                                                                                                                                                                                                                                                                                                                                                                                                                                                                                                                                                                              | 377   | e-130   |
| CB381628              | 1.16E-02        | Mo17<B73=F1         | 1.3                      | 10                  | ns                                                                                                                                                                                                                                                                                                                                                                                                                                                                                                                                                                                                                                                                                                                                                                                                                                                                                                                                                                                                                                                                                                                                                                                                                                                                                                                                                           |       |         |
| DV492987              | 1.16E-02        | B73<F1=Mo17         | 1.3                      | 3                   | >gb AAT93852.1  putative GH1 protein or auxin-regulated protein [Oryza sativa(japonica cultivar-group)] gb AAS98482.1  putative GH1 protein or auxin regulated protein [Oryza sativa (japonica cultivar-group)]<br>>dbj BAD81331.1  putative aux/IAA protein [Oryza sativa (japonica cultivar-group)]dbj BAD81283.1  putative aux/IAA protein [Oryza sativa (japonica cultivar-group)]<br>>ref NP_913504.1  unnamed protein product [Oryza sativa (japonica cultivar-group)]<br>>gb AAM12952.1  auxin-regulated protein [Zinnia elegans]<br>>dbj BAD61890.1  putative auxin-regulated protein [Oryza sativa (japonicacultivar-group)]                                                                                                                                                                                                                                                                                                                                                                                                                                                                                                                                                                                                                                                                                                                        | 257   | 2E-30   |
| DV622265              | 1.17E-02        | B73=Mo17<F1         | 1.32                     | 12                  | group)<br>>ref NP_912888.1  unnamed protein product [Oryza sativa (japonica cultivar-group)]dbj BAA92519.1  putative ADP-ribosylation factor [Oryza sativa (japonica cultivar-group)] dbj BAA90347.1  putative ADP-ribosylation factor [Oryza sativa (japonica cultivar-group)]<br>>ref NP_911519.1  ADP-ribosylation factor 1 [Oryza sativa (japonica cultivar-group)]ref NP_911517.1  ADP-ribosylation factor 1 [Oryza sativa (japonica cultivar-group)] dbj BAD31195.1  ADP-ribosylation factor 1 [Oryza sativa (japonica cultivar-group)] dbj BAC45192.1  ADP-ribosylation factor 1 [Oryza sativa (japonica cultivar-group)] dbj BAC06914.1  ADP-ribosylation factor 1 [Oryza sativa (japonica cultivar-group)] gb AAB65432.1  ADP-ribosylation factor 1 [Oryza sativa]<br>>gb AAT08648.1  ADP-ribosylation factor [Hyacinthus orientalis]<br>>ref NP_172533.2  GTP binding [Arabidopsis thaliana]gb AAT70455.1  At1g10630 [Arabidopsis thaliana] gb AAT41759.1  At1g10630 [Arabidopsis thaliana]<br>>ref XP_479496.1  putative acyl-CoA dehydrogenase [Oryza sativa (japonicacultivar-group)] dbj BAD31978.1  putative acyl-CoA dehydrogenase [Oryza sativa (japonica cultivar-group)] dbj BAC83542.1  putative acyl-CoA dehydrogenase [Oryza sativa (japonica cultivar-group)]                                                                         | 181   | 5E-81   |
| DV622300              | 1.17E-02        | B73<Mo17            | 1.42                     | 4                   | >ref XP_479496.1  putative acyl-CoA dehydrogenase [Oryza sativa (japonicacultivar-group)] dbj BAC83542.1  putative acyl-CoA dehydrogenase [Oryza sativa (japonica cultivar-group)]<br>>gb AAF63817.1  acetyl-coA dehydrogenase, putative [Arabidopsis thaliana]<br>>dbj BAD43785.1  unnamed protein product [Arabidopsis thaliana]<br>>ref NP_187337.2  ATP binding / acyl-CoA dehydrogenase/ oxidoreductase/ protein kinase[Arabidopsis thaliana] gb AAN86198.1  unknown protein [Arabidopsis thaliana] gb AAM14036.1  unknown protein [Arabidopsis thaliana]<br>>dbj BAC48254.1  b1r2989 [Bradyrhizobium japonicum USDA 110]ref NP_769629.1  putative acyl-CoA dehydrogenase [Bradyrhizobium japonicum USDA 110]                                                                                                                                                                                                                                                                                                                                                                                                                                                                                                                                                                                                                                           | 831   | 3E-83   |
| CD058904              | 1.17E-02        | Mo17<B73=F1         | 1.24                     | 10                  | >gb AAT08725.1  histone H4 [Hyacinthus orientalis]<br>>emb CAB01913.1  Histone H4 homologue [Sesbania rostrata]<br>>ref NP_563793.1  DNA binding [Arabidopsis thaliana]ref NP_850660.1  DNA binding [Arabidopsis thaliana] ref NP_180441.1  HIS4 [Arabidopsis thaliana]<br>ref NP_568911.1  DNA binding [Arabidopsis thaliana] ref NP_568918.1  DNA binding [Arabidopsis thaliana] ref NP_190941.1  DNA binding [Arabidopsis thaliana]<br>ref NP_563797.1  DNA binding [Arabidopsis thaliana] ref NP_850939.1  DNA binding [Arabidopsis thaliana] ref NP_190179.1  DNA binding [Arabidopsis thaliana] ref XP_475394.1  histone H4 [Oryza sativa (japonica cultivar-group)] ref XP_475383.1  putative histone H4 [Oryza sativa (japonica cultivar-group)]<br>ref NP_912452.1  Unknown protein [Oryza sativa (japonica cultivar-group)] ref XP_467181.1  histone H4 [Oryza sativa (japonica cultivar-group)] ref NP_922551.1  histone H4 [Oryza sativa (japonica cultivar-group)] ref NP_915374.1  putative histone H4 [Oryza sativa (japonica cultivar-group)] ref NP_910647.1  histone H4 [Oryza sativa (japonica cultivar-group)] ref XP_473659.1  OSJNBa0088A01.17 [Oryza sativa (japonica cultivar-group)] gb AAU90170.1  histone H4 [Oryza sativa<br>>sp P62786 H42 WHEAT Histone H4 variant TH091 gb AAA34292.1  histone H4<br>>prf 1101277A histone H4 | 103   | 5E-26   |
| BM074002              | 1.17E-02        | Mo17<B73=F1         | 1.45                     | 11                  | >dbj BAD29288.1  putative beta-alanine synthase [Oryza sativa (japonicacultivar-group)] dbj BAD28433.1  putative beta-alanine synthase [Oryza sativa (japonica cultivar-group)] dbj BAB59126.1  putative hydrolase [Oryza sativa (japonica cultivar-group)]<br>>emb CAB45873.1  beta-alanine synthase [Lycopersicon esculentum]<br>>gb ABA40443.1  beta-alanine synthase-like protein [Solanum tuberosum]<br>>ref NP_850101.1  NLP1 (NITRILASE-LIKE PROTEIN 1); hydrolase, acting on carbon-nitrogen (but not peptide) bonds [Arabidopsis thaliana] gb AAM67496.1  putative nitrilase [Arabidopsis thaliana] gb AAL59935.1  putative nitrilase [Arabidopsis thaliana]<br>>ref NP_565650.1  NLP1 (NITRILASE-LIKE PROTEIN 1); hydrolase, acting on carbon-nitrogen (but not peptide) bonds [Arabidopsis thaliana] gb AAD15597.2  putative nitrilase [Arabidopsis thaliana] gb AAM63266.1  putative nitrilase [Arabidopsis thaliana]                                                                                                                                                                                                                                                                                                                                                                                                                            | 301   | 3E-19   |
| CD001516              | 1.18E-02        | Mo17<B73=F1         | 1.6                      | 10                  | ns                                                                                                                                                                                                                                                                                                                                                                                                                                                                                                                                                                                                                                                                                                                                                                                                                                                                                                                                                                                                                                                                                                                                                                                                                                                                                                                                                           |       |         |
| DV549450              | 1.19E-02        | B73=Mo17<F1         | 1.31                     | 12                  | >dbj BAD53577.1  putative SSR alpha subunit [Oryza sativa (japonica cultivar-group)]<br>>gb AAM63845.1  putative signal sequence receptor, alpha subunit (SSR-alpha)[Arabidopsis thaliana]<br>>gb AAW28548.1  At2g21160 [Arabidopsis thaliana]ref NP_565498.1  ATP binding [Arabidopsis thaliana] gb AAD29800.2  putative signal sequence receptor, alpha subunit (SSR-alpha) [Arabidopsis thaliana] gb AAK91368.1  At2g21160/F26H11.8 [Arabidopsis thaliana] sp P45434 SSRA_ARATH Translocon-associated protein alpha subunit precursor (TRAP-alpha) (Signal sequence receptor alpha subunit) (SSR-alpha)<br>>gb AAA21820.1  alpha-subunit; putative<br>>ref NP_179250.2  unknown protein [Arabidopsis thaliana]gb AAT85767.1  At2g16595 [Arabidopsis thaliana]<br>>ref XP_476340.1  unknown protein [Oryza sativa (japonica cultivar-group)]ref XP_506126.1  PREDICTED B1026C12.9 gene product [Oryza sativa (japonica cultivar-group)] dbj BAD31818.1  unknown protein [Oryza sativa (japonica cultivar-group)]                                                                                                                                                                                                                                                                                                                                           | 257   | 9E-75   |
| CB815841              | 1.19E-02        | Mo17<B73            | 1.36                     | 9                   | >ref NP_179250.2  unknown protein [Arabidopsis thaliana]gb AAT85767.1  At2g16595 [Arabidopsis thaliana]<br>>ref XP_476340.1  unknown protein [Oryza sativa (japonica cultivar-group)]ref XP_506126.1  PREDICTED B1026C12.9 gene product [Oryza sativa (japonica cultivar-group)] dbj BAD31818.1  unknown protein [Oryza sativa (japonica cultivar-group)]                                                                                                                                                                                                                                                                                                                                                                                                                                                                                                                                                                                                                                                                                                                                                                                                                                                                                                                                                                                                    | 258   | 4E-51   |
|                       |                 |                     |                          |                     | >gb AAA21820.1  alpha-subunit; putative<br>>ref NP_179250.2  unknown protein [Arabidopsis thaliana]gb AAT85767.1  At2g16595 [Arabidopsis thaliana]<br>>ref XP_476340.1  unknown protein [Oryza sativa (japonica cultivar-group)]ref XP_506126.1  PREDICTED B1026C12.9 gene product [Oryza sativa (japonica cultivar-group)] dbj BAD31818.1  unknown protein [Oryza sativa (japonica cultivar-group)]                                                                                                                                                                                                                                                                                                                                                                                                                                                                                                                                                                                                                                                                                                                                                                                                                                                                                                                                                         | 258   | 1E-50   |
|                       |                 |                     |                          |                     | >gb AAA21820.1  alpha-subunit; putative<br>>ref NP_179250.2  unknown protein [Arabidopsis thaliana]gb AAT85767.1  At2g16595 [Arabidopsis thaliana]<br>>ref XP_476340.1  unknown protein [Oryza sativa (japonica cultivar-group)]ref XP_506126.1  PREDICTED B1026C12.9 gene product [Oryza sativa (japonica cultivar-group)] dbj BAD31818.1  unknown protein [Oryza sativa (japonica cultivar-group)]                                                                                                                                                                                                                                                                                                                                                                                                                                                                                                                                                                                                                                                                                                                                                                                                                                                                                                                                                         | 253   | 1E-50   |
|                       |                 |                     |                          |                     | >ref NP_179250.2  unknown protein [Arabidopsis thaliana]gb AAT85767.1  At2g16595 [Arabidopsis thaliana]<br>>ref XP_476340.1  unknown protein [Oryza sativa (japonica cultivar-group)]ref XP_506126.1  PREDICTED B1026C12.9 gene product [Oryza sativa (japonica cultivar-group)] dbj BAD31818.1  unknown protein [Oryza sativa (japonica cultivar-group)]                                                                                                                                                                                                                                                                                                                                                                                                                                                                                                                                                                                                                                                                                                                                                                                                                                                                                                                                                                                                    | 251   | 1E-41   |
|                       |                 |                     |                          |                     | >ref XP_476340.1  unknown protein [Oryza sativa (japonica cultivar-group)]ref XP_506126.1  PREDICTED B1026C12.9 gene product [Oryza sativa (japonica cultivar-group)] dbj BAD31818.1  unknown protein [Oryza sativa (japonica cultivar-group)]                                                                                                                                                                                                                                                                                                                                                                                                                                                                                                                                                                                                                                                                                                                                                                                                                                                                                                                                                                                                                                                                                                               | 503   | 2E-21   |

**Table 4. Microarray analysis results, mode of gene action classification, and BLAST annotation for the 1,367 ESTs identified as differentially expressed among genotypes (15% FDR)**

| GenBank accession no. | Overall P value | Significant pattern | Fold change <sup>†</sup> | Sector <sup>‡</sup> | BLAST annotation*                                                                                                                                                                                                                                                                                                                                                                       | Score | E value |
|-----------------------|-----------------|---------------------|--------------------------|---------------------|-----------------------------------------------------------------------------------------------------------------------------------------------------------------------------------------------------------------------------------------------------------------------------------------------------------------------------------------------------------------------------------------|-------|---------|
|                       |                 |                     |                          |                     | >ref NP_181524.1  unknown protein [Arabidopsis thaliana]gb AAB95280.1  hypothetical protein [Arabidopsis thaliana]                                                                                                                                                                                                                                                                      | 636   | 1E-15   |
| DV549779              | 1.19E-02        | F1=Mo17<B73         | 2.17                     | 9                   | ns                                                                                                                                                                                                                                                                                                                                                                                      |       |         |
| CA829580              | 1.19E-02        | Mo17<B73=F1         | 1.31                     | 10                  | >gb ABA91392.1  expressed protein [Oryza sativa (japonica cultivar-group)]                                                                                                                                                                                                                                                                                                              | 298   | 3E-50   |
|                       |                 |                     |                          |                     | >gb ABA96396.1  hypothetical protein LOC_Os12g03710 [Oryza sativa (japonica cultivar-group)]                                                                                                                                                                                                                                                                                            | 235   | 5E-38   |
|                       |                 |                     |                          |                     | >dbj BAB10406.1  unnamed protein product [Arabidopsis thaliana]                                                                                                                                                                                                                                                                                                                         | 248   | 1E-28   |
|                       |                 |                     |                          |                     | >ref NP_201402.2  RNA binding / nucleic acid binding [Arabidopsis thaliana]                                                                                                                                                                                                                                                                                                             | 289   | 1E-28   |
|                       |                 |                     |                          |                     | >dbj BAB02497.1  unnamed protein product [Arabidopsis thaliana]                                                                                                                                                                                                                                                                                                                         | 278   | 2E-24   |
| DV491739              | 1.19E-02        | Mo17<B73            | 1.39                     | 10                  | >ref NP_182304.2  cation transporter/ efflux permease [Arabidopsis thaliana]gb AAM98140.1  unknown protein [Arabidopsis thaliana] gb AAP31955.1  At2g47830 [Arabidopsis thaliana] sp Q8L725 MTPC1_ARATH Metal tolerance protein C1 (AtMTPc1)                                                                                                                                            | 471   | 2E-11   |
|                       |                 |                     |                          |                     | >ref NP_850480.1  cation transporter/ efflux permease [Arabidopsis thaliana]                                                                                                                                                                                                                                                                                                            | 468   | 2E-9    |
|                       |                 |                     |                          |                     | >gb AAC63637.1  unknown protein [Arabidopsis thaliana]                                                                                                                                                                                                                                                                                                                                  | 483   | 3E-9    |
| CB885593              | 1.20E-02        | Mo17<B73=F1         | 1.27                     | 10                  | >ref XP_475493.1  putative protein translation factor Sui1 [Oryza sativa (japonica cultivar-group)] gb AAT44286.1  putative protein translation factor Sui1 [Oryza sativa (japonica cultivar-group)]                                                                                                                                                                                    | 115   | 6E-59   |
|                       |                 |                     |                          |                     | >dbj BAD53005.1  putative translation initiation factor [Oryza sativa (japonica cultivar-group)]                                                                                                                                                                                                                                                                                        | 115   | 3E-56   |
|                       |                 |                     |                          |                     | >ref XP_478516.1  translational initiation factor eIF1 [Oryza sativa (japonica cultivar-group)] emb CAA36190.1  GOS2 [Oryza sativa (indica cultivar-group)]                                                                                                                                                                                                                             |       |         |
|                       |                 |                     |                          |                     | gb AAK56324.1  translational initiation factor eIF1 [Porteresia coarctata] dbj BAC45143.1  translational initiation factor eIF1 [Oryza sativa (japonica cultivar-group)] gb AAC67556.1  translation initiation factor [Oryza sativa] pir S21636 GOS2 protein - rice sp P33278 SUI1_ORYZA PROTEIN TRANSLATION FACTOR SUI1 HOMOLOG (GOS2 PROTEIN)                                         | 115   | 1E-54   |
|                       |                 |                     |                          |                     | >emb CAB61837.1  putative translation initiation factor eIF-1 [Sporobolus stapfianus] sp Q9SM41 SUI1_SPOST Protein translation factor SUI1 homolog                                                                                                                                                                                                                                      | 115   | 3E-54   |
|                       |                 |                     |                          |                     | >sp P56330 SUI1_MAIZE Protein translation factor SUI1 homolog (GOS2 protein)gb AAB88615.1  translation initiation factor: GOS2 [Zea mays]                                                                                                                                                                                                                                               | 115   | 5E-54   |
| CD001098              | 1.20E-02        | Mo17<B73            | 1.2                      | 10                  | >emb CAA60251.1  60S acidic ribosomal protein [Zea mays]sp P46252 RLA2A_MAIZE 60S acidic ribosomal protein P2A (P2)                                                                                                                                                                                                                                                                     | 112   | 2E-28   |
|                       |                 |                     |                          |                     | >gb AAC49360.1  acidic ribosomal protein P2                                                                                                                                                                                                                                                                                                                                             | 112   | 2E-28   |
|                       |                 |                     |                          |                     | >gb AAD11459.1  acidic ribosomal protein P2a-2 [Zea mays]                                                                                                                                                                                                                                                                                                                               | 112   | 1E-27   |
|                       |                 |                     |                          |                     | >gb AAP80644.1  acidic ribosomal protein P2a-2 [Triticum aestivum]gb AAP80619.1  acidic ribosomal protein P2 [Triticum aestivum]                                                                                                                                                                                                                                                        | 112   | 4E-23   |
|                       |                 |                     |                          |                     | >ref NP_914551.1  putative 60S acidic ribosomal protein P2A [Oryza sativa (japonica cultivar-group)]                                                                                                                                                                                                                                                                                    | 135   | 5E-23   |
| CB351628              | 1.20E-02        | B73<F1=Mo17         | 4.38                     | 3                   | ns                                                                                                                                                                                                                                                                                                                                                                                      |       |         |
| DV493287              | 1.21E-02        | F1=Mo17<B73         | 1.27                     | 9                   | >ref XP_483757.1  putative auxin-regulated protein [Oryza sativa (japonica cultivar-group)] dbj BAD13127.1  putative auxin-regulated protein [Oryza sativa (japonica cultivar-group)] dbj BAD09092.1  putative auxin-regulated protein [Oryza sativa (japonica cultivar-group)]                                                                                                         | 341   | 1E-49   |
|                       |                 |                     |                          |                     | >ref NP_568128.1  unknown protein [Arabidopsis thaliana]gb AAM10048.1  unknown protein [Arabidopsis thaliana] gb AAK96798.1  Unknown protein [Arabidopsis thaliana]                                                                                                                                                                                                                     | 339   | 3E-43   |
|                       |                 |                     |                          |                     | >emb CAB85508.1  putative protein [Arabidopsis thaliana]dbj BAB08614.1  unnamed protein product [Arabidopsis thaliana]                                                                                                                                                                                                                                                                  | 331   | 3E-43   |
|                       |                 |                     |                          |                     | >gb AAM65224.1  unknown [Arabidopsis thaliana]                                                                                                                                                                                                                                                                                                                                          | 339   | 1E-42   |
|                       |                 |                     |                          |                     | >emb CAB78123.1  putative protein [Arabidopsis thaliana]emb CAB39624.1  putative protein [Arabidopsis thaliana]                                                                                                                                                                                                                                                                         | 327   | 3E-15   |
| DV491691              | 1.21E-02        | B73=Mo17<F1         | 1.36                     | 1                   | ns                                                                                                                                                                                                                                                                                                                                                                                      |       |         |
| BM079199              | 1.21E-02        | Mo17<B73=F1         | 1.38                     | 10                  | >sp P49104 RAB2B_MAIZE Ras-related protein Rab-2-Bgb AAA63902.1  GTP binding protein                                                                                                                                                                                                                                                                                                    | 210   | 1E-66   |
|                       |                 |                     |                          |                     | >sp P49103 RAB2A_MAIZE Ras-related protein Rab-2-Agb AAA63901.1  GTP binding protein                                                                                                                                                                                                                                                                                                    | 209   | 5E-66   |
|                       |                 |                     |                          |                     | >ref XP_466431.1  putative GTP-binding protein yptm3 [Oryza sativa (japonica cultivar-group)] ref XP_506841.1  PREDICTED OSJNBb0056122.32 gene product [Oryza sativa (japonica cultivar-group)] dbj BAD17483.1  putative GTP-binding protein yptm3 [Oryza sativa (japonica cultivar-group)]                                                                                             | 210   | 2E-65   |
|                       |                 |                     |                          |                     | >gb AAW52512.1  small GTP-binding protein [Triticum aestivum]                                                                                                                                                                                                                                                                                                                           | 210   | 1E-64   |
|                       |                 |                     |                          |                     | >emb CAD57744.1  RAB-like small G-protein [Hordeum vulgare subsp. vulgare]                                                                                                                                                                                                                                                                                                              | 215   | 2E-64   |
| DV942719              | 1.21E-02        | B73<F1=Mo17         | 1.36                     | 3                   | >ref XP_473087.1  OSJNBa0014K14.18 [Oryza sativa (japonica cultivar-group)]emb CAE05558.1  OSJNBb0116K07.11 [Oryza sativa (japonica cultivar-group)]                                                                                                                                                                                                                                    | 659   | 6E-81   |
|                       |                 |                     |                          |                     | >emb CAE02947.3  OSJNBa0014K14.19 [Oryza sativa (japonica cultivar-group)]                                                                                                                                                                                                                                                                                                              | 657   | 6E-81   |
|                       |                 |                     |                          |                     | >gb AAF66823.1  poly(A)-binding protein [Nicotiana tabacum]                                                                                                                                                                                                                                                                                                                             | 649   | 1E-72   |
|                       |                 |                     |                          |                     | >gb AAF63202.1  poly(A)-binding protein [Cucumis sativus]                                                                                                                                                                                                                                                                                                                               | 649   | 3E-72   |
|                       |                 |                     |                          |                     | >ref XP_450039.1  putative poly(A)-binding protein [Oryza sativa (japonica cultivar-group)] ref XP_506632.1  PREDICTED OJ1310_F05.15 gene product [Oryza sativa (japonica cultivar-group)] dbj BAD16229.1  putative poly(A)-binding protein [Oryza sativa (japonica cultivar-group)]                                                                                                    | 662   | 3E-70   |
| BM349174              | 1.21E-02        | Mo17<B73=F1         | 1.48                     | 11                  | >ref XP_507177.1  PREDICTED OSJNBb0070J06.25 gene product [Oryza sativa (japonica cultivar-group)] ref XP_480935.1  putative cytochrome P450 reductase [Oryza sativa (japonica cultivar-group)] dbj BAD05443.1  putative cytochrome P450 reductase [Oryza sativa (japonica cultivar-group)] dbj BAD05639.1  putative cytochrome P450 reductase [Oryza sativa (japonica cultivar-group)] | 568   | 5E-79   |
|                       |                 |                     |                          |                     | >emb CAC83301.1  cytochrome P450 reductase [Triticum aestivum]                                                                                                                                                                                                                                                                                                                          | 703   | 1E-73   |
|                       |                 |                     |                          |                     | >emb CAA81209.1  NADPH-ferrihemoprotein reductase [Helianthus tuberosus]                                                                                                                                                                                                                                                                                                                | 588   | 9E-73   |
|                       |                 |                     |                          |                     | >gb AAK15261.1  NADPH-cytochrome P450 oxydoreductase isoform 3 [Populus balsamifera subsp. trichocarpa x Populus deltoides]                                                                                                                                                                                                                                                             | 712   | 2E-72   |



**Table 4. Microarray analysis results, mode of gene action classification, and BLAST annotation for the 1,367 ESTs identified as differentially expressed among genotypes (15% FDR)**

| GenBank accession no.                                              | Overall P value | Significant pattern | Fold change <sup>†</sup> | Sector <sup>‡</sup> | BLAST annotation*                                                                                                                                                                                                                                                                                                                                                                                                                        | Score | E value |
|--------------------------------------------------------------------|-----------------|---------------------|--------------------------|---------------------|------------------------------------------------------------------------------------------------------------------------------------------------------------------------------------------------------------------------------------------------------------------------------------------------------------------------------------------------------------------------------------------------------------------------------------------|-------|---------|
| DV550395                                                           | 1.21E-02        | Mo17<B73=F1         | 1.27                     | 10                  | >gb AAK15260.1  NADPH-cytochrome P450 oxidoreductase isoform 2 [Populus balsamifera subsp. trichocarpa x Populus deltoides]                                                                                                                                                                                                                                                                                                              | 712   | 2E-72   |
|                                                                    |                 |                     |                          |                     | >gb ABA94507.1  NB-ARC domain, putative [Oryza sativa (japonica cultivar-group)]                                                                                                                                                                                                                                                                                                                                                         | 911   | 1E-7    |
|                                                                    |                 |                     |                          |                     | >gb ABA94518.1  NB-ARC domain, putative [Oryza sativa (japonica cultivar-group)]                                                                                                                                                                                                                                                                                                                                                         | 920   | 2E-6    |
|                                                                    |                 |                     |                          |                     | >gb ABA94509.1  NB-ARC domain, putative [Oryza sativa (japonica cultivar-group)]                                                                                                                                                                                                                                                                                                                                                         | 1812  | 3E-6    |
|                                                                    |                 |                     |                          |                     | >gb ABA94521.1  NB-ARC domain, putative [Oryza sativa (japonica cultivar-group)]                                                                                                                                                                                                                                                                                                                                                         | 964   | 5E-6    |
| DV549599                                                           | 1.21E-02        | B73<F1=Mo17         | 1.22                     | 3                   | >gb AAG03094.2  putative ribosomal protein L28 [Oryza sativa (japonica cultivar-group)] gb AAW56888.1  unknown protein [Oryza sativa (japonica cultivar-group)]                                                                                                                                                                                                                                                                          | 137   | 2E-39   |
|                                                                    |                 |                     |                          |                     | >ref NP_565765.1  structural constituent of ribosome [Arabidopsis thaliana] gb AAM47937.1  putative chloroplast 50S ribosomal protein L28 [Arabidopsis thaliana]                                                                                                                                                                                                                                                                         |       |         |
|                                                                    |                 |                     |                          |                     | gb AAB80662.2  putative chloroplast 50S ribosomal protein L28 [Arabidopsis thaliana] gb AAL62365.1  putative chloroplast 50S ribosomal protein L28 [Arabidopsis thaliana] gb AAM64654.1  putative chloroplast 50S ribosomal protein L28 [Arabidopsis thaliana] sp O22795 RK28_ARATH 50S ribosomal protein L28, chloroplast precursor                                                                                                     | 143   | 8E-37   |
|                                                                    |                 |                     |                          |                     | >pir F84745  probable chloroplast 50S ribosomal protein L28 [imported] - Arabidopsis thaliana                                                                                                                                                                                                                                                                                                                                            | 140   | 8E-37   |
|                                                                    |                 |                     |                          |                     | >ref XP_493864.1  putative ribosomal protein L28 [Oryza sativa]                                                                                                                                                                                                                                                                                                                                                                          | 88    | 2E-36   |
|                                                                    |                 |                     |                          |                     | >emb CAA4821.1  ribosomal protein CL28 [Nicotiana tabacum] sp P30956 RK28_TOBAC 50S ribosomal protein L28, chloroplast precursor (CL28) pir R5NT28 ribosomal protein L28 precursor, chloroplast - tobacco                                                                                                                                                                                                                                | 151   | 3E-34   |
|                                                                    |                 |                     |                          |                     | >emb CAB57993.1  superoxide dismutase-4A [Zea mays] gb AAB49913.1  superoxide dismutase 4A                                                                                                                                                                                                                                                                                                                                               | 152   | 4E-40   |
|                                                                    |                 |                     |                          |                     | >emb CAB57992.1  superoxide dismutase-4AP [Zea mays] sp P23345 SODC4_MAIZE Superoxide dismutase [Cu-Zn] 4A                                                                                                                                                                                                                                                                                                                               | 152   | 4E-40   |
|                                                                    |                 |                     |                          |                     | >sp P23346 SODC5_MAIZE Superoxide dismutase [Cu-Zn] 4AP                                                                                                                                                                                                                                                                                                                                                                                  | 152   | 4E-40   |
|                                                                    |                 |                     |                          |                     | >gb AAY56345.1  cytoplasmic copper/zinc-superoxide dismutase [Oryza sativa (indica cultivar-group)] sp P28756 SODC1_ORYSA Superoxide dismutase [Cu-Zn] 1 gb AAC14464.1  cytosolic copper/zinc-superoxide dismutase [Oryza sativa] dbj BAA00799.1  copper/zinc-superoxide dismutase [Oryza sativa (japonica cultivar-group)] prf 2111424A Cu/Zn superoxide dismutase                                                                      | 152   | 3E-37   |
| >gb AAA33917.1  superoxide dismutase                               | 152             | 3E-37               |                          |                     |                                                                                                                                                                                                                                                                                                                                                                                                                                          |       |         |
| DV942221                                                           | 1.22E-02        | B73<F1<Mo17         | 1.37                     | 4                   | >dbj BAD82510.1  unknown protein [Oryza sativa (japonica cultivar-group)] dbj BAD82157.1  unknown protein [Oryza sativa (japonica cultivar-group)]                                                                                                                                                                                                                                                                                       | 408   | 2E-21   |
|                                                                    |                 |                     |                          |                     | >ref NP_916962.1  P0445E10.13 [Oryza sativa (japonica cultivar-group)]                                                                                                                                                                                                                                                                                                                                                                   | 595   | 8E-21   |
|                                                                    |                 |                     |                          |                     | >ref NP_916970.1  P0445E10.21 [Oryza sativa (japonica cultivar-group)]                                                                                                                                                                                                                                                                                                                                                                   | 372   | 1E-16   |
|                                                                    |                 |                     |                          |                     | >ref XP_463397.1  P0025A05.27 [Oryza sativa (japonica cultivar-group)]                                                                                                                                                                                                                                                                                                                                                                   | 265   | 2E-56   |
| CD651155                                                           | 1.22E-02        | Mo17<B73=F1         | 1.33                     | 10                  | >dbj BAD52984.1  unknown protein [Oryza sativa (japonica cultivar-group)] dbj BAD53435.1  unknown protein [Oryza sativa (japonica cultivar-group)]                                                                                                                                                                                                                                                                                       | 334   | 2E-56   |
|                                                                    |                 |                     |                          |                     | >dbj BAD52985.1  unknown protein [Oryza sativa (japonica cultivar-group)] dbj BAD53434.1  unknown protein [Oryza sativa (japonica cultivar-group)]                                                                                                                                                                                                                                                                                       | 524   | 2E-56   |
|                                                                    |                 |                     |                          |                     | ns                                                                                                                                                                                                                                                                                                                                                                                                                                       |       |         |
| DV489477                                                           | 1.22E-02        | Mo17<B73            | 2.77                     | 10                  | >gb AAQ02664.1  boron transporter [Oryza sativa (japonica cultivar-group)]                                                                                                                                                                                                                                                                                                                                                               | 711   | 3E-24   |
|                                                                    |                 |                     |                          |                     | >gb ABA98983.1  HCO3- transporter family, putative [Oryza sativa (japonica cultivar-group)]                                                                                                                                                                                                                                                                                                                                              | 711   | 3E-24   |
|                                                                    |                 |                     |                          |                     | >ref NP_850469.1  BOR1 (REQUIRES HIGH BORON 1); anion exchanger [Arabidopsis thaliana] gb AAN31874.1  putative anion exchange protein [Arabidopsis thaliana] gb AAM20076.1  putative anion exchange protein [Arabidopsis thaliana] gb AAL49824.1  putative anion exchange protein [Arabidopsis thaliana]                                                                                                                                 |       |         |
|                                                                    |                 |                     |                          |                     | dbj BAC20173.1  BOR1 [Arabidopsis thaliana] sp Q8VYR7 BOR1_ARATH Boron transporter 1                                                                                                                                                                                                                                                                                                                                                     | 704   | 5E-21   |
|                                                                    |                 |                     |                          |                     | >gb AAD26598.1  putative anion exchange protein [Arabidopsis thaliana]                                                                                                                                                                                                                                                                                                                                                                   | 542   | 5E-21   |
|                                                                    |                 |                     |                          |                     | >ref NP_191786.1  anion exchanger [Arabidopsis thaliana] jemb CAB71887.1  putative protein [Arabidopsis thaliana] gb AAM20125.1  unknown protein [Arabidopsis thaliana] gb AAL67019.1  unknown protein [Arabidopsis thaliana] sp Q9M1P7 BOR2_ARATH Putative boron transporter 2                                                                                                                                                          | 703   | 2E-20   |
|                                                                    |                 |                     |                          |                     | >ref XP_472410.1  OJ000126_13.9 [Oryza sativa (japonica cultivar-group)] jemb CAE02065.2  OJ000126_13.9 [Oryza sativa (japonica cultivar-group)]                                                                                                                                                                                                                                                                                         |       |         |
|                                                                    |                 |                     |                          |                     | dbj BAD29299.1  40S ribosomal protein S14 [Oryza sativa (japonica cultivar-group)] dbj BAD27798.1  40S ribosomal protein S14 [Oryza sativa (japonica cultivar-group)]                                                                                                                                                                                                                                                                    | 151   | 2E-63   |
|                                                                    |                 |                     |                          |                     | >sp P19951 RS142_MAIZE 40S ribosomal protein S14 (Clone MCH2)                                                                                                                                                                                                                                                                                                                                                                            | 150   | 1E-62   |
|                                                                    |                 |                     |                          |                     | >ref XP_464199.1  putative ribosomal protein S14 [Oryza sativa (japonica cultivar-group)] ref XP_506724.1  PREDICTED OJ9003_G05.34 gene product [Oryza sativa (japonica cultivar-group)] dbj BAD25218.1  putative ribosomal protein S14 [Oryza sativa (japonica cultivar-group)]                                                                                                                                                         | 150   | 6E-61   |
| >gb AAO41731.1  cytoplasmic ribosomal protein S14 [Brassica napus] | 150             | 3E-59               |                          |                     |                                                                                                                                                                                                                                                                                                                                                                                                                                          |       |         |
| >sp P19950 RS141_MAIZE 40S ribosomal protein S14 (Clone MCH1)      | 149             | 1E-58               |                          |                     |                                                                                                                                                                                                                                                                                                                                                                                                                                          |       |         |
| DV550821                                                           | 1.23E-02        | Mo17<B73=F1         | 1.43                     | 11                  | >gb ABA81853.1  NADH:ubiquinone oxidoreductase-like [Solanum tuberosum]                                                                                                                                                                                                                                                                                                                                                                  | 229   | 1E-64   |
|                                                                    |                 |                     |                          |                     | >emb CAA59062.1  NADH dehydrogenase; NADH:ubiquinone oxidoreductase (complex I) [Solanum tuberosum] sp P80269 NUIM_SOLTU NADH-ubiquinone oxidoreductase 23 kDa subunit, mitochondrial precursor (Complex I-23KD) (CI-23KD) (Complex I-28.5KD) (CI-28.5KD)                                                                                                                                                                                | 229   | 1E-64   |
|                                                                    |                 |                     |                          |                     | >ref NP_173114.1  NADH dehydrogenase (ubiquinone)/ electron transporter/ iron ionbinding [Arabidopsis thaliana] gb AAM10193.1  putative NADH-ubiquinone oxidoreductase [Arabidopsis thaliana] gb AAL24404.1  Putative NADH-ubiquinone oxidoreductase [Arabidopsis thaliana] gb AAM62674.1  NADH:ubiquinone oxidoreductase, putative [Arabidopsis thaliana] gb AAG10813.1  Putative NADH-ubiquinone oxidoreductase [Arabidopsis thaliana] | 222   | 2E-64   |
|                                                                    |                 |                     |                          |                     |                                                                                                                                                                                                                                                                                                                                                                                                                                          |       |         |

**Table 4. Microarray analysis results, mode of gene action classification, and BLAST annotation for the 1,367 ESTs identified as differentially expressed among genotypes (15% FDR)**

| GenBank accession no. | Overall P value | Significant pattern | Fold change <sup>†</sup> | Sector <sup>‡</sup> | BLAST annotation*                                                                                                                                                                                                                                                                                                                                                                                                                                                                                                                                                                                                                                                                                                                                       | Score | E value |
|-----------------------|-----------------|---------------------|--------------------------|---------------------|---------------------------------------------------------------------------------------------------------------------------------------------------------------------------------------------------------------------------------------------------------------------------------------------------------------------------------------------------------------------------------------------------------------------------------------------------------------------------------------------------------------------------------------------------------------------------------------------------------------------------------------------------------------------------------------------------------------------------------------------------------|-------|---------|
|                       |                 |                     |                          |                     | >ref NP_178022.1  NADH dehydrogenase (ubiquinone)/ electron transporter/ iron ionbinding [Arabidopsis thaliana] emb CAA59061.1  NADH dehydrogenase; NADH:ubiquinone oxidoreductase (complex I) [Arabidopsis thaliana] gb AAL62013.1  At1g79010/YUP8H12R_21 [Arabidopsis thaliana] gb AAK82503.1  At1g79010/YUP8H12R_21 [Arabidopsis thaliana] gb AAM65847.1  NADH dehydrogenase, putative [Arabidopsis thaliana] gb AAC17054.1  Match to NADH:ubiquinone oxidoreductase gb X84318 from A.thaliana. ESTs gb Z27005, gb T04711, gb T45078 and gb Z28689 come from this gene. [Arabidopsis thaliana] sp Q42599 NUIM_ARATH NADH-ubiquinone oxidoreductase 23 kDa subunit, mitochondrial precursor (Complex I-23KD) (CI-23KD) (Complex I-28.5KD) (CI-28.5KD) | 222   | 2E-64   |
|                       |                 |                     |                          |                     | >ref NP_919060.1  putative NADH dehydrogenase [Oryza sativa (japonica cultivar-group)] gb AAP68893.1  putative NADH dehydrogenase [Oryza sativa (japonica cultivar-group)]                                                                                                                                                                                                                                                                                                                                                                                                                                                                                                                                                                              | 223   | 5E-64   |
| BG842494              | 1.24E-02        | Mo17<B73=F1         | 1.5                      | 10                  | ns                                                                                                                                                                                                                                                                                                                                                                                                                                                                                                                                                                                                                                                                                                                                                      |       |         |
|                       |                 |                     |                          |                     | >ref XP_473907.1  OSJNBa0093O08.15 [Oryza sativa (japonica cultivar-group)]emb CAD41896.2  OSJNBa0093O08.15 [Oryza sativa (japonica cultivar-group)] emb CAD41739.2  OSJNBa0058K23.5 [Oryza sativa (japonica cultivar-group)]                                                                                                                                                                                                                                                                                                                                                                                                                                                                                                                           | 298   | 9E-67   |
| DV489746              | 1.24E-02        | B73<F1=Mo17         | 1.2                      | 2                   | >ref NP_567600.1  GSNAP (GAMMA-SOLUBLE NSF ATTACHMENT PROTEIN); intracellular transporter [Arabidopsis thaliana] gb AAF01285.1  gamma-soluble NSF attachment protein; gamma-SNAP [Arabidopsis thaliana] sp Q9SPE5 SNAG_ARATH Gamma-soluble NSF attachment protein (Gamma-SNAP) (N-ethylmaleimide-sensitive factor attachment protein, gamma)                                                                                                                                                                                                                                                                                                                                                                                                            | 291   | 3E-53   |
|                       |                 |                     |                          |                     | >gb AAM63730.1  unknown [Arabidopsis thaliana]                                                                                                                                                                                                                                                                                                                                                                                                                                                                                                                                                                                                                                                                                                          | 291   | 3E-53   |
|                       |                 |                     |                          |                     | >emb CAB79041.1  putative protein [Arabidopsis thaliana]emb CAB45807.1  putative protein [Arabidopsis thaliana] pir T10583 hypothetical protein F9F13.60 - Arabidopsis thaliana                                                                                                                                                                                                                                                                                                                                                                                                                                                                                                                                                                         | 319   | 9E-49   |
|                       |                 |                     |                          |                     | >gb ABA40435.1  unknown [Solanum tuberosum]                                                                                                                                                                                                                                                                                                                                                                                                                                                                                                                                                                                                                                                                                                             | 274   | 6E-40   |
|                       |                 |                     |                          |                     | >ref NP_910927.2  putative translation elongation factor eEF-1 beta' chain [Oryza sativa (japonica cultivar-group)] ref XP_506540.1  PREDICTED P0453E03.111 gene product [Oryza sativa (japonica cultivar-group)] dbj BAC22427.2  putative translation elongation factor eEF-1 beta' chain [Oryza sativa (japonica cultivar-group)]                                                                                                                                                                                                                                                                                                                                                                                                                     | 224   | 2E-30   |
| CB331033              | 1.24E-02        | B73=Mo17<F1         | 1.3                      | 12                  | >dbj BAA02253.1  elongation factor 1 beta' [Oryza sativa (japonica cultivar-group)]sp P29545 EF1B_ORYSA Elongation factor 1-beta (EF-1-beta) (Elongation factor 1B-alpha 2) (eEF-1B alpha) (Elongation factor 1-beta) (EF-1-beta)                                                                                                                                                                                                                                                                                                                                                                                                                                                                                                                       | 223   | 2E-30   |
|                       |                 |                     |                          |                     | >dbj BAA02436.1  elongation factor 1 beta' [Triticum aestivum]sp P29546 EF1B_WHEAT Elongation factor 1-beta (EF-1-beta) (Elongation factor 1B-alpha 2) (eEF1B alpha) (Elongation factor 1-beta) (EF-1-beta)                                                                                                                                                                                                                                                                                                                                                                                                                                                                                                                                             | 216   | 6E-29   |
|                       |                 |                     |                          |                     | >ref NP_568375.2  translation elongation factor [Arabidopsis thaliana]emb CAB64730.1  elongation factor 1B alpha-subunit [Arabidopsis thaliana] gb AAL07240.1  putative elongation factor 1B alpha-subunit [Arabidopsis thaliana] gb AAK26014.1  putative elongation factor 1B alpha-subunit [Arabidopsis thaliana] sp Q9SCX3 EF1B2 ARATH Elongation factor 1-beta 2 (EF-1-beta 2) (Elongation factor 1B-alpha 2) (eEF-1B alpha 2) (Elongation factor 1-beta' 2) (EF-1-beta' 2)                                                                                                                                                                                                                                                                         | 224   | 3E-22   |
|                       |                 |                     |                          |                     | >gb ABA40463.1  elongation factor-like protein [Solanum tuberosum]                                                                                                                                                                                                                                                                                                                                                                                                                                                                                                                                                                                                                                                                                      | 227   | 4E-20   |
|                       |                 |                     |                          |                     | >ref NP_920480.1  putative activator-like transposable element [Oryza sativa (japonica cultivar-group)] gb AAM18172.1  Putative activator-like transposable element [Oryza sativa (japonica cultivar-group)] gb AAP52767.1  hAT family dimerisation domain, putative [Oryza sativa (japonica cultivar-group)]                                                                                                                                                                                                                                                                                                                                                                                                                                           | 737   | 4E-21   |
| DV495467              | 1.25E-02        | Mo17<B73=F1         | 1.33                     | 10                  | >prf 2021344A activator-like transposable element                                                                                                                                                                                                                                                                                                                                                                                                                                                                                                                                                                                                                                                                                                       | 804   | 3E-20   |
|                       |                 |                     |                          |                     | >ref XP_471074.1  OSJNBa0020P07.19 [Oryza sativa (japonica cultivar-group)]emb CAE01302.2  OSJNBa0020P07.19 [Oryza sativa (japonica cultivar-group)]                                                                                                                                                                                                                                                                                                                                                                                                                                                                                                                                                                                                    | 741   | 7E-20   |
|                       |                 |                     |                          |                     | >emb CAA25636.1  unnamed protein product [Zea mays]                                                                                                                                                                                                                                                                                                                                                                                                                                                                                                                                                                                                                                                                                                     | 427   | 4E-14   |
|                       |                 |                     |                          |                     | >emb CAA29005.1  ORFa [Zea mays]gb ABB59986.1  Ac transposase [Immobilized Ac/T-DNA vector pNU400] gb ABB59981.1  Ac transposase [Immobilized Ac/T-DNA vector pKU352NA] sp P08770 TRA1 MAIZE Putative AC transposase (ORFA)                                                                                                                                                                                                                                                                                                                                                                                                                                                                                                                             | 807   | 4E-14   |
| DV493472              | 1.25E-02        | Mo17<F1             | 2.27                     | 11                  | >ref XP_472957.1  OJ991113 30.8 [Oryza sativa (japonica cultivar-group)]emb CAD41325.2  OJ991113 30.8 [Oryza sativa (japonica cultivar-group)]                                                                                                                                                                                                                                                                                                                                                                                                                                                                                                                                                                                                          | 205   | 2E-61   |
|                       |                 |                     |                          |                     | >ref NP_188871.1  ATRPABC24.3; DNA binding / DNA-directed RNA polymerase [Arabidopsis thaliana] gb AAL06554.1  AT3g22320/MCB17_5 [Arabidopsis thaliana] gb AAM63355.1  RNA polymerase I, II and III 24.3 kDa subunit [Arabidopsis thaliana] gb AAK48978.1  RNA polymerase I, II and III 24.3 kDa subunit [Arabidopsis thaliana] dbj BAB01769.1  RNA polymerase I, II and III 24.3 kDa subunit [Arabidopsis thaliana] gb AAN72141.1  RNA polymerase I, II and III 24.3 kDa subunit [Arabidopsis thaliana] gb AAC28253.1  RNA polymerase I, II and III 24.3 kDa subunit [Arabidopsis thaliana]                                                                                                                                                            | 205   | 5E-52   |
|                       |                 |                     |                          |                     | >dbj BAD68174.1  putative DNA-directed RNA polymerase II 23K chain [Oryza sativa (japonica cultivar-group)]                                                                                                                                                                                                                                                                                                                                                                                                                                                                                                                                                                                                                                             | 210   | 9E-48   |
|                       |                 |                     |                          |                     | >ref XP_396561.1  PREDICTED: similar to ENSANGP00000006082 [Apis mellifera]                                                                                                                                                                                                                                                                                                                                                                                                                                                                                                                                                                                                                                                                             | 210   | 3E-36   |
|                       |                 |                     |                          |                     | >gb AAW26085.1  SJCHGC05306 protein [Schistosoma japonicum]                                                                                                                                                                                                                                                                                                                                                                                                                                                                                                                                                                                                                                                                                             | 206   | 8E-36   |
|                       |                 |                     |                          |                     | >ref XP_472252.1  OSJNBa0072D21.15 [Oryza sativa (japonica cultivar-group)]emb CAE05283.2  OSJNBa0084N21.1 [Oryza sativa (japonica cultivar-group)]                                                                                                                                                                                                                                                                                                                                                                                                                                                                                                                                                                                                     | 601   | 2E-61   |
| CD568437              | 1.25E-02        | B73=F1<Mo17         | 1.24                     | 4                   | emb CAD40733.2  OSJNBa0072D21.15 [Oryza sativa (japonica cultivar-group)]                                                                                                                                                                                                                                                                                                                                                                                                                                                                                                                                                                                                                                                                               | 403   | 9E-29   |
|                       |                 |                     |                          |                     | >ref XP_465886.1  hypothetical protein [Oryza sativa (japonica cultivar-group)]dbj BAD23171.1  hypothetical protein [Oryza sativa (japonica cultivar-group)]                                                                                                                                                                                                                                                                                                                                                                                                                                                                                                                                                                                            | 291   | 3E-28   |
|                       |                 |                     |                          |                     | >ref NP_911578.1  hypothetical protein [Oryza sativa (japonica cultivar-group)]dbj BAC21511.1  hypothetical protein [Oryza sativa (japonica cultivar-group)]                                                                                                                                                                                                                                                                                                                                                                                                                                                                                                                                                                                            | 622   | 4E-24   |
|                       |                 |                     |                          |                     | >gb AAL06537.1  AT3g11590/F24K9_26 [Arabidopsis thaliana]                                                                                                                                                                                                                                                                                                                                                                                                                                                                                                                                                                                                                                                                                               | 292   | 4E-24   |
|                       |                 |                     |                          |                     | >ref NP_566392.1  unknown protein [Arabidopsis thaliana]gb AAG51453.1  unknown protein; 103163-106072 [Arabidopsis thaliana] gb AAN72254.1  At3g11590/F24K9_26 [Arabidopsis thaliana]                                                                                                                                                                                                                                                                                                                                                                                                                                                                                                                                                                   | 622   | 4E-24   |
| DV549577              | 1.25E-02        | Mo17<B73            | 1.53                     | 9                   | ns                                                                                                                                                                                                                                                                                                                                                                                                                                                                                                                                                                                                                                                                                                                                                      |       |         |

**Table 4. Microarray analysis results, mode of gene action classification, and BLAST annotation for the 1,367 ESTs identified as differentially expressed among genotypes (15% FDR)**

| GenBank accession no. | Overall P value | Significant pattern | Fold change <sup>†</sup> | Sector <sup>‡</sup> | BLAST annotation*                                                                                                                                                                                                                                                                                                                                                                                                                                                                                                                                                                                                                                                                                                                                                                                                                                                                                                                                                                                                                                                                                                                                                                                                                                                                                                                                                                                                                                                                     | Score                           | E value                                   |
|-----------------------|-----------------|---------------------|--------------------------|---------------------|---------------------------------------------------------------------------------------------------------------------------------------------------------------------------------------------------------------------------------------------------------------------------------------------------------------------------------------------------------------------------------------------------------------------------------------------------------------------------------------------------------------------------------------------------------------------------------------------------------------------------------------------------------------------------------------------------------------------------------------------------------------------------------------------------------------------------------------------------------------------------------------------------------------------------------------------------------------------------------------------------------------------------------------------------------------------------------------------------------------------------------------------------------------------------------------------------------------------------------------------------------------------------------------------------------------------------------------------------------------------------------------------------------------------------------------------------------------------------------------|---------------------------------|-------------------------------------------|
| CB281944              | 1.26E-02        | Mo17<B73=F1         | 1.3                      | 10                  | >ref NP_200296.1  unknown protein [Arabidopsis thaliana]gb AAT41804.1  At5g54850 [Arabidopsis thaliana] gb AAS99667.1  At5g54850 [Arabidopsis thaliana] dbj BAB08764.1  unnamed protein product [Arabidopsis thaliana]                                                                                                                                                                                                                                                                                                                                                                                                                                                                                                                                                                                                                                                                                                                                                                                                                                                                                                                                                                                                                                                                                                                                                                                                                                                                | 202                             | 3E-8                                      |
| CB815800              | 1.27E-02        | Mo17<B73=F1         | 1.32                     | 11                  | >emb CAB57992.1  superoxide dismutase-4AP [Zea mays]sp P23345 SODC4 MAIZE Superoxide dismutase [Cu-Zn] 4A<br>>sp P23346 SODC5 MAIZE Superoxide dismutase [Cu-Zn] 4AP<br>>emb CAB57993.1  superoxide dismutase-4A [Zea mays]gb AAB49913.1  superoxide dismutase 4A<br>>gb AA56345.1  cytoplasmic copper/zinc-superoxide dismutase [Oryza sativa (japonica cultivar-group)] sp P28756 SODC1_ORYSA Superoxide dismutase [Cu-Zn] 1 gb AAC14464.1  cytosolic copper/zinc-superoxide dismutase [Oryza sativa] dbj BAA00799.1  copper/zinc-superoxide dismutase [Oryza sativa (japonica cultivar-group)] prf 2111424A Cu/Zn superoxide dismutase<br>>gb AAA33917.1  superoxide dismutase                                                                                                                                                                                                                                                                                                                                                                                                                                                                                                                                                                                                                                                                                                                                                                                                     | 152<br>152<br>152               | 2E-61<br>2E-61<br>2E-59                   |
| CD527566              | 1.27E-02        | B73<Mo17            | 1.35                     | 4                   | >gb AAC27715.1  eukaryotic translation initiation factor p28 subunit [Zea mays]sp O81482 IF4E2_MAIZE Eukaryotic translation initiation factor 4E-2 (eIF4E-2) (eIF-4E-2) (mRNA cap-binding protein) (eIF-(iso)4F 25 kDa subunit) (eIF-(iso)4F p28 subunit)<br>>ref NP_921914.1  cap-binding protein p28 [Oryza sativa (japonica cultivar-group)]gb AAK27811.1  cap-binding protein p28 [Oryza sativa (japonica cultivar-group)] gb AAP54201.1  cap-binding protein p28 [Oryza sativa (japonica cultivar-group)]<br>>sp P48600 IF4E2_ORYSA Eukaryotic translation initiation factor 4E-2 (eIF4E-2) (eIF-4E-2)(mRNA cap-binding protein) (eIF-(iso)4F 25 kDa subunit) (eIF-(iso)4F p28 subunit) gb AAB40349.1  p28<br>>gb AAA34296.1  initiation factor (iso)4F p28 subunit<br>>sp Q03389 IF4E2_WHEAT Eukaryotic translation initiation factor 4E-2 (eIF4E-2) (eIF-4E-2)(mRNA cap-binding protein) (eIF-(iso)4F 25 kDa subunit) (eIF-(iso)4F p28 subunit) pir B44452 translation initiation factor eIF-4F isozyme form subunit p28 - wheat gb AAA34295.1  initiation factor (iso)4F p28 subunit                                                                                                                                                                                                                                                                                                                                                                                          | 216<br>206<br>206<br>209        | 2E-81<br>2E-71<br>6E-71<br>3E-66          |
| CD058883              | 1.27E-02        | Mo17<B73            | 1.29                     | 10                  | >gb ABA94601.1  ribosomal protein S4 [Oryza sativa (japonica cultivar-group)]gb ABA94599.1  ribosomal protein S4 [Oryza sativa (japonica cultivar-group)]<br>>gb ABA94602.1  ribosomal protein S4 [Oryza sativa (japonica cultivar-group)]<br>>emb CAG47084.1  40S ribosomal protein S9 [Catharanthus roseus]<br>>ref NP_198801.1  structural constituent of ribosome [Arabidopsis thaliana]gb AAM65655.1  40S ribosomal protein S9-like [Arabidopsis thaliana] dbj BAB10209.1  40S ribosomal protein S9 [Arabidopsis thaliana]<br>>gb AAU93594.1  putative ribosomal protein [Solanum demissum]                                                                                                                                                                                                                                                                                                                                                                                                                                                                                                                                                                                                                                                                                                                                                                                                                                                                                      | 195<br>192<br>197<br>197        | 5E-67<br>1E-63<br>3E-63<br>4E-63          |
| CB381301              | 1.28E-02        | Mo17<B73            | 1.46                     | 9                   | >ref XP_470037.1  putative 40S ribosomal protein S2 [Oryza sativa (japonica cultivar-group)] gb AAP21434.1  putative 40S ribosomal protein S2 [Oryza sativa (japonica cultivar-group)]<br>>ref XP_477083.1  putative 40S ribosomal protein S2 [Oryza sativa (japonica cultivar-group)] dbj BAC83243.1  putative 40S ribosomal protein S2 [Oryza sativa (japonica cultivar-group)]<br>>ref NP_191308.1  structural constituent of ribosome [Arabidopsis thaliana]emb CAB66106.1  40S ribosomal protein S2 homolog [Arabidopsis thaliana] gb AAM60846.1  40S ribosomal protein S2 homolog [Arabidopsis thaliana] gb AAP12849.1  At3g57490 [Arabidopsis thaliana]<br>>gb AAM67061.1  ribosomal protein S2, putative [Arabidopsis thaliana]<br>>ref NP_683443.1  structural constituent of ribosome [Arabidopsis thaliana]ref NP_564737.1  structural constituent of ribosome [Arabidopsis thaliana] ref NP_564740.1  structural constituent of ribosome [Arabidopsis thaliana] dbj BAD94842.1  ribosomal protein S2 [Arabidopsis thaliana] gb AAM91489.1  At1g59359/T4M14_3 [Arabidopsis thaliana] gb AAL57668.1  At1g59359/T4M14_3 [Arabidopsis thaliana] gb AAK62784.1  ribosomal protein S2, putative [Arabidopsis thaliana] gb AAK62780.1  ribosomal protein S2, putative [Arabidopsis thaliana] dbj BAB84016.1  ribosomal protein S2 [Arabidopsis thaliana] dbj BAB84012.1  ribosomal protein S2 [Arabidopsis thaliana] dbj BAB82426.1  ribosomal protein S2 [Arabidopsis thaliana] | 274<br>276<br>276<br>284        | 7E-94<br>3E-93<br>1E-88<br>8E-88          |
| DV942393              | 1.28E-02        | B73=F1<Mo17         | 1.26                     | 4                   | >emb CAC14890.1  d-TDP-glucose dehydratase [Phragmites australis]<br>>dbj BAB84334.1  UDP-glucuronic acid decarboxylase [Oryza sativa (japonica cultivar-group)]<br>>gb AAT80326.1  UDP-D-glucuronate decarboxylase [Hordeum vulgare]<br>>gb AAB68605.1  thymidine diphospho-glucose 4-6-dehydratase homolog [Prunus armeniaca]<br>>gb AAR07600.1  fiber dTDP-glucose 4-6-dehydratase [Gossypium barbadense]                                                                                                                                                                                                                                                                                                                                                                                                                                                                                                                                                                                                                                                                                                                                                                                                                                                                                                                                                                                                                                                                          | 350<br>350<br>348<br>265<br>181 | 3E-60<br>9E-59<br>2E-57<br>4E-51<br>7E-49 |
| DV493707              | 1.29E-02        | B73<F1=Mo17         | 1.32                     | 3                   | >ref NP_918865.1  P0458A05.23 [Oryza sativa (japonica cultivar-group)]dbj BAB64088.1  putative SUMO protease [Oryza sativa (japonica cultivar-group)] dbj BAB19414.1  putative SUMO protease [Oryza sativa (japonica cultivar-group)]<br>>gb AAF26995.1  hypothetical protein [Arabidopsis thaliana]<br>>dbj BAC42191.1  unknown protein [Arabidopsis thaliana]<br>>ref NP_187347.2  cysteine-type peptidase [Arabidopsis thaliana]<br>>ref NP_567478.1  ESD4 (EARLY IN SHORT DAYS 4); cysteine-type peptidase [Arabidopsis thaliana] gb AAM10110.1  unknown protein [Arabidopsis thaliana] gb AAK62379.1  Unknown protein [Arabidopsis thaliana]                                                                                                                                                                                                                                                                                                                                                                                                                                                                                                                                                                                                                                                                                                                                                                                                                                     | 497<br>478<br>502<br>502<br>489 | 4E-35<br>3E-24<br>3E-24<br>3E-24<br>3E-21 |
| DV491056              | 1.29E-02        | F1=Mo17<B73         | 1.31                     | 8                   | >dbj BAD27593.1  putative aspartate transaminase [Oryza sativa (japonica cultivar-group)]<br>>dbj BAA23814.1  aspartate aminotransferase [Oryza sativa (japonica cultivar-group)]<br>>emb CAA45024.1  aspartate aminotransferase [Panicum miliaceum]dbj BAA04993.1  aspartate aminotransferase [Panicum miliaceum]<br>>emb CAA45022.1  aspartate aminotransferase [Panicum miliaceum]<br>>dbj BAD93907.1  aspartate aminotransferase [Arabidopsis thaliana]                                                                                                                                                                                                                                                                                                                                                                                                                                                                                                                                                                                                                                                                                                                                                                                                                                                                                                                                                                                                                           | 432<br>132<br>428<br>428<br>189 | 7E-24<br>1E-23<br>2E-23<br>4E-23<br>8E-23 |

**Table 4. Microarray analysis results, mode of gene action classification, and BLAST annotation for the 1,367 ESTs identified as differentially expressed among genotypes (15% FDR)**

| GenBank accession no. | Overall P value | Significant pattern | Fold change <sup>†</sup> | Sector <sup>‡</sup> | BLAST annotation*                                                                                                                                                                                                                                                                                                                                        | Score | E value |
|-----------------------|-----------------|---------------------|--------------------------|---------------------|----------------------------------------------------------------------------------------------------------------------------------------------------------------------------------------------------------------------------------------------------------------------------------------------------------------------------------------------------------|-------|---------|
| DV551160              | 1.29E-02        | Mo17<B73=F1         | 1.62                     | 10                  | ns                                                                                                                                                                                                                                                                                                                                                       |       |         |
| CB603871              | 1.29E-02        | Mo17<B73=F1         | 1.33                     | 10                  | >emb CAA92821.1  3-hydroxy-3-methylglutaryl-CoA reductase [Oryza sativa (indica cultivar-group)] gb AAD08820.1  3-hydroxy-3-methylglutaryl-CoA reductase [Oryza sativa]                                                                                                                                                                                  | 576   | 4E-9    |
|                       |                 |                     |                          |                     | >gb AAB53748.1  Isolation and Characterization of a cDNA Encoding 3-Hydroxy-3-Methylglutaryl-CoA Reductase from Rice                                                                                                                                                                                                                                     | 495   | 4E-9    |
|                       |                 |                     |                          |                     | >gb AAB69726.1  3-hydroxy-3-methylglutaryl coenzyme A reductase [Camptotheca acuminata]                                                                                                                                                                                                                                                                  | 575   | 8E-7    |
|                       |                 |                     |                          |                     | >emb CAA48611.1  hydroxymethylglutaryl-CoA reductase (NADPH) [Raphanus sativus]                                                                                                                                                                                                                                                                          | 573   | 1E-6    |
|                       |                 |                     |                          |                     | >emb CAA48610.1  hydroxymethylglutaryl-CoA reductase (NADPH) [Raphanus sativus]                                                                                                                                                                                                                                                                          | 583   | 1E-6    |
| CD661734              | 1.29E-02        | Mo17<F1             | 1.18                     | 11                  | >gb AAM95942.1  nucleosome/chromatin assembly factor group D protein [Zea mays] emb CAA41220.1  high mobility group protein [Zea mays]                                                                                                                                                                                                                   | 157   | 9E-19   |
|                       |                 |                     |                          |                     | emb CAB46752.1  HMGB protein [Zea mays] sp P27347 MNB1B MAIZE DNA-binding protein MNB1B (HMG1-like protein)                                                                                                                                                                                                                                              | 168   | 9E-19   |
|                       |                 |                     |                          |                     | >emb CAA46876.1  DNA-binding protein [Zea mays] pir T03640 high mobility group protein MNB1b - maize (fragment)                                                                                                                                                                                                                                          |       |         |
|                       |                 |                     |                          |                     | >gb AAP21609.1  HMGB1 [Oryza sativa (indica cultivar-group)] gb AAN28722.1  HMGB1 protein [Oryza sativa (indica cultivar-group)] dbj BAD61823.1  HMGB1 [Oryza sativa (japonica cultivar-group)] gb AAC78104.1  high mobility group protein [Oryza sativa]                                                                                                | 157   | 2E-17   |
|                       |                 |                     |                          |                     | >emb CAA77641.1  high mobility group protein [Triticum aestivum] sp P40621 HMGL WHEAT HMGB1/2-like protein                                                                                                                                                                                                                                               | 161   | 6E-17   |
|                       |                 |                     |                          |                     | >emb CAA90679.1  HMGB1/2-like protein [Hordeum vulgare subsp. vulgare]                                                                                                                                                                                                                                                                                   | 160   | 4E-16   |
| BM348678              | 1.30E-02        | Mo17<B73            | 1.41                     | 9                   | >ref NP_177698.1  unknown protein [Arabidopsis thaliana] gb AAP21355.1  At1g75690 [Arabidopsis thaliana] dbj BAC42509.1  unknown protein [Arabidopsis thaliana] gb AAO00738.1  unknown protein [Arabidopsis thaliana]                                                                                                                                    | 154   | 8E-36   |
|                       |                 |                     |                          |                     | >gb AAF87111.1  F10A5.12 [Arabidopsis thaliana]                                                                                                                                                                                                                                                                                                          | 199   | 1E-31   |
| DV490066              | 1.30E-02        | F1=Mo17<B73         | 1.22                     | 9                   | >ref XP_481915.1  putative wound inductive gene [Oryza sativa (japonica cultivar-group)] dbj BAD03758.1  putative wound inductive gene [Oryza sativa (japonica cultivar-group)]                                                                                                                                                                          | 215   | 2E-86   |
|                       |                 |                     |                          |                     | >ref XP_481914.1  putative wound inductive gene [Oryza sativa (japonica cultivar-group)] ref XP_507201.1  PREDICTED P0426E02.15-2 gene product [Oryza sativa (japonica cultivar-group)] dbj BAD03757.1  putative wound inductive gene [Oryza sativa (japonica cultivar-group)]                                                                           | 325   | 2E-86   |
|                       |                 |                     |                          |                     | >dbj BAA95791.1  wound inductive gene [Nicotiana tabacum]                                                                                                                                                                                                                                                                                                | 317   | 2E-63   |
|                       |                 |                     |                          |                     | >ref NP_564093.1  unknown protein [Arabidopsis thaliana] ref NP_001031068.1  unknown protein [Arabidopsis thaliana] gb AAL15188.1  unknown protein [Arabidopsis thaliana] gb AAK59521.1  unknown protein [Arabidopsis thaliana]                                                                                                                          | 329   | 1E-60   |
|                       |                 |                     |                          |                     | >gb AAM65561.1  wound-responsive protein, putative [Arabidopsis thaliana]                                                                                                                                                                                                                                                                                | 329   | 1E-60   |
| DV491768              | 1.30E-02        | Mo17<B73            | 1.53                     | 10                  | >ref XP_463278.1  B1108H10.8 [Oryza sativa (japonica cultivar-group)] dbj BAB92723.1  putative stress-responsive protein [Oryza sativa (japonica cultivar-group)]                                                                                                                                                                                        | 113   | 7E-9    |
|                       |                 |                     |                          |                     | >gb AAP92753.1  stress-responsive protein [Oryza sativa (japonica cultivar-group)]                                                                                                                                                                                                                                                                       | 113   | 6E-8    |
|                       |                 |                     |                          |                     | >ref NP_566569.1  unknown protein [Arabidopsis thaliana] gb AAL47379.1  unknown protein [Arabidopsis thaliana] gb AAK43839.1  Unknown protein [Arabidopsis thaliana] dbj BAB02723.1  unnamed protein product [Arabidopsis thaliana] sp Q9LUV2 POP3 ARATH Putative Pop3 protein                                                                           | 109   | 2E-6    |
|                       |                 |                     |                          |                     | >pdb 1Q53 B Chain B, Solution Structure Of Hypothetical Arabidopsis Thaliana Protein At3g17210. Center For Eukaryotic Structural Genomics Target 13081                                                                                                                                                                                                   |       |         |
|                       |                 |                     |                          |                     | >pdb 1Q53 A Chain A, Solution Structure Of Hypothetical Arabidopsis Thaliana Protein At3g17210. Center For Eukaryotic Structural Genomics Target 13081                                                                                                                                                                                                   | 112   | 2E-6    |
|                       |                 |                     |                          |                     | >pdb 1Q4R A Chain A, Gene Product Of At3g17210 From Arabidopsis Thaliana                                                                                                                                                                                                                                                                                 | 112   | 2E-6    |
| BM074109              | 1.31E-02        | Mo17<B73=F1         | 1.89                     | 10                  | ns                                                                                                                                                                                                                                                                                                                                                       |       |         |
| BM072888              | 1.31E-02        | B73<F1              | 1.53                     | 1                   | ns                                                                                                                                                                                                                                                                                                                                                       |       |         |
| A1622802              | 1.31E-02        | F1=Mo17<B73         | 1.39                     | 9                   | >gb AAP45177.1  hypothetical protein 177013.35 [Solanum bulbocastanum]                                                                                                                                                                                                                                                                                   | 311   | 2E-74   |
|                       |                 |                     |                          |                     | >ref NP_568702.1  unknown protein [Arabidopsis thaliana] gb AAL77718.1  AT5g48790/K24G6_12 [Arabidopsis thaliana] gb AAK60299.1  AT5g48790/K24G6_12 [Arabidopsis thaliana]                                                                                                                                                                               | 316   | 2E-72   |
|                       |                 |                     |                          |                     | >dbj BAB09432.1  unnamed protein product [Arabidopsis thaliana]                                                                                                                                                                                                                                                                                          | 248   | 2E-34   |
|                       |                 |                     |                          |                     | >ref XP_463882.1  unknown protein [Oryza sativa (japonica cultivar-group)] dbj BAD07724.1  unknown protein [Oryza sativa (japonica cultivar-group)]                                                                                                                                                                                                      | 377   | 5E-6    |
|                       |                 |                     |                          |                     | >emb CAA55478.1  serine carboxylase II-3 [Hordeum vulgare subsp. vulgare] gb AAB31589.1  CP-MII.3=serine carboxypeptidase [Hordeum vulgare=barley, cv. Alexis, aleurone, Peptide, 516 aa] sp P52711 CBP23_HORVU Serine carboxypeptidase II-3 precursor (CP-MII.3) [Contains: Serine carboxypeptidase II-3 chain A; Serine carboxypeptidase II-3 chain B] | 516   | 5E-24   |
| BM382060              | 1.32E-02        | Mo17<B73            | 1.44                     | 9                   | >gb AAO72592.1  serine carboxypeptidase [Oryza sativa (japonica cultivar-group)]                                                                                                                                                                                                                                                                         | 445   | 1E-23   |
|                       |                 |                     |                          |                     | >ref NP_910862.1  putative serine carboxypeptidase II-3 precursor [Oryza sativa (japonica cultivar-group)] dbj BAC16131.1  putative serine carboxypeptidase II-3 precursor [Oryza sativa (japonica cultivar-group)]                                                                                                                                      | 524   | 1E-23   |
|                       |                 |                     |                          |                     | >emb CAB59202.1  serine carboxylase II-2 [Hordeum vulgare subsp. vulgare] gb AAB31590.1  CP-MII.2=serine carboxypeptidase [Hordeum vulgare=barley, cv. Alexis, aleurone, Peptide, 436 aa] sp P55748 CBP22_HORVU Serine carboxypeptidase II-2 precursor (CP-MII.2) [Contains: Serine carboxypeptidase II-2 chain A; Serine carboxypeptidase II-2 chain B] | 436   | 1E-11   |
|                       |                 |                     |                          |                     | >emb CAC19488.1  putative serine carboxypeptidase [Pisum sativum]                                                                                                                                                                                                                                                                                        | 494   | 2E-11   |
|                       |                 |                     |                          |                     | >ref NP_912975.1  unnamed protein product [Oryza sativa (japonica cultivar-group)] dbj BAA88176.1  putative zwille protein [Oryza sativa (japonica cultivar-group)]                                                                                                                                                                                      | 904   | 5E-68   |
| CB885756              | 1.32E-02        | B73=F1<Mo17         | 1.43                     | 4                   | >gb ABC61504.1  AGO4-1 [Nicotiana benthamiana]                                                                                                                                                                                                                                                                                                           | 912   | 2E-57   |
|                       |                 |                     |                          |                     | >gb ABC61505.1  AGO4-2 [Nicotiana benthamiana]                                                                                                                                                                                                                                                                                                           | 905   | 1E-56   |

**Table 4. Microarray analysis results, mode of gene action classification, and BLAST annotation for the 1,367 ESTs identified as differentially expressed among genotypes (15% FDR)**

| GenBank accession no. | Overall P value | Significant pattern | Fold change <sup>†</sup> | Sector <sup>‡</sup> | BLAST annotation*                                                                                                                                                                                                                                                                                                                                                                                                                                                                                                                                                                                                                                                                                       | Score | E value |
|-----------------------|-----------------|---------------------|--------------------------|---------------------|---------------------------------------------------------------------------------------------------------------------------------------------------------------------------------------------------------------------------------------------------------------------------------------------------------------------------------------------------------------------------------------------------------------------------------------------------------------------------------------------------------------------------------------------------------------------------------------------------------------------------------------------------------------------------------------------------------|-------|---------|
|                       |                 |                     |                          |                     | >ref NP_565633.1  AGO4 (ARGONAUTE 4) [Arabidopsis thaliana]gb AAK93710.1  putative argonaute AGO1 protein [Arabidopsis thaliana] gb AAK59586.1  putative Argonaute (AGO1) protein [Arabidopsis thaliana] gb AAC77862.2  Argonaute (AGO1)-like protein [Arabidopsis thaliana]                                                                                                                                                                                                                                                                                                                                                                                                                            | 924   | 1E-53   |
|                       |                 |                     |                          |                     | >dbj BAD81109.1  zwille protein -like [Oryza sativa (japonica cultivar-group)]                                                                                                                                                                                                                                                                                                                                                                                                                                                                                                                                                                                                                          | 879   | 9E-48   |
| CA829857              | 1.32E-02        | B73<F1              | 1.21                     | 2                   | ns                                                                                                                                                                                                                                                                                                                                                                                                                                                                                                                                                                                                                                                                                                      |       |         |
| DV495393              | 1.32E-02        | Mo17<B73            | 1.32                     | 9                   | >ref XP_475553.1  putative isovaleryl-CoA dehydrogenase [Oryza sativa (japonica cultivar-group)] gb AAT39231.1  putative isovaleryl-CoA dehydrogenase [Oryza sativa (japonica cultivar-group)] gb AAS90672.2  putative isovaleryl-CoA dehydrogenase [Oryza sativa (japonica cultivar-group)]                                                                                                                                                                                                                                                                                                                                                                                                            | 409   | 6E-65   |
|                       |                 |                     |                          |                     | >emb CAB55555.1  auxin binding protein (ABP44); isovaleryl-CoA Dehydrogenase [Pisumsativum]                                                                                                                                                                                                                                                                                                                                                                                                                                                                                                                                                                                                             | 409   | 2E-60   |
|                       |                 |                     |                          |                     | >emb CAB55554.1  Isovaleryl-CoA Dehydrogenase; auxin binding protein (ABP44) [Pisumsativum]                                                                                                                                                                                                                                                                                                                                                                                                                                                                                                                                                                                                             | 408   | 2E-60   |
|                       |                 |                     |                          |                     | >gb AAM91199.1  isovaleryl-CoA-dehydrogenase precursor IVD [Arabidopsis thaliana]gb AAL32645.1  isovaleryl-CoA-dehydrogenase precursor (IVD) [Arabidopsis thaliana]                                                                                                                                                                                                                                                                                                                                                                                                                                                                                                                                     | 409   | 3E-60   |
|                       |                 |                     |                          |                     | >ref NP_190116.1  IVD (ISOVALERYL-COA-DEHYDROGENASE) [Arabidopsis thaliana]emb CAA73227.1  Isovaleryl-CoA Dehydrogenase [Arabidopsis thaliana] emb CAB72479.1  isovaleryl-CoA-dehydrogenase precursor (IVD) [Arabidopsis thaliana]                                                                                                                                                                                                                                                                                                                                                                                                                                                                      | 409   | 8E-60   |
| CB885626              | 1.32E-02        | B73<F1=Mo17         | 1.23                     | 3                   | >gb ABA95868.1  actin 3, putative [Oryza sativa (japonica cultivar-group)]                                                                                                                                                                                                                                                                                                                                                                                                                                                                                                                                                                                                                              | 260   | 1E-48   |
|                       |                 |                     |                          |                     | >gb AAV83798.1  putative actin 2 [Chorispora bungeana]                                                                                                                                                                                                                                                                                                                                                                                                                                                                                                                                                                                                                                                  | 363   | 1E-48   |
|                       |                 |                     |                          |                     | >gb AAU44177.1  putative actin [Oryza sativa (japonica cultivar-group)]                                                                                                                                                                                                                                                                                                                                                                                                                                                                                                                                                                                                                                 | 377   | 1E-48   |
|                       |                 |                     |                          |                     | >gb AAC49651.1  actin [Striga asiatica]                                                                                                                                                                                                                                                                                                                                                                                                                                                                                                                                                                                                                                                                 | 377   | 1E-48   |
|                       |                 |                     |                          |                     | >ref NP_187818.1  ACT11 (ACTIN-11); structural constituent of cytoskeleton[Arabidopsis thaliana] gb AAM65277.1  actin 11 (ACT11) [Arabidopsis thaliana] gb AAG51045.1  actin 11 (ACT11); 24016-22523 [Arabidopsis thaliana] gb AAO64013.1  putative actin 11 (ACT11) [Arabidopsis thaliana] dbj BAB01959.1  actin 11 [Arabidopsis thaliana] dbj BAC42968.1  unknown protein [Arabidopsis thaliana] sp P53496 ACT11 ARATH Actin-11 gb AAB39404.1  actin-11                                                                                                                                                                                                                                               | 377   | 1E-48   |
| CB815720              | 1.33E-02        | Mo17<B73            | 1.25                     | 10                  | >gb AAL59231.1  ribosomal protein L35A [Zea mays]                                                                                                                                                                                                                                                                                                                                                                                                                                                                                                                                                                                                                                                       | 112   | 4E-59   |
|                       |                 |                     |                          |                     | >gb AAK73115.1  ribosomal protein L35A [Zea mays]                                                                                                                                                                                                                                                                                                                                                                                                                                                                                                                                                                                                                                                       | 112   | 5E-59   |
|                       |                 |                     |                          |                     | >ref XP_468159.1  putative ribosomal protein L35A [Oryza sativa (japonica cultivar-group)] ref XP_507015.1  PREDICTED OJ1715_H01.42 gene product [Oryza sativa (japonica cultivar-group)] dbj BAD19312.1  putative ribosomal protein L35A [Oryza sativa (japonica cultivar-group)] dbj BAD19202.1  putative ribosomal protein L35A [Oryza sativa (japonica cultivar-group)]                                                                                                                                                                                                                                                                                                                             | 112   | 6E-55   |
|                       |                 |                     |                          |                     | >ref XP_475896.1  putative ribosomal protein L35A [Oryza sativa (japonica cultivar-group)] ref XP_475888.1  putative ribosomal protein L35A [Oryza sativa (japonica cultivar-group)] gb AAT58712.1  putative ribosomal protein L35A [Oryza sativa (japonica cultivar-group)] gb AAT58704.1  putative ribosomal protein L35A [Oryza sativa (japonica cultivar-group)]                                                                                                                                                                                                                                                                                                                                    | 111   | 4E-51   |
|                       |                 |                     |                          |                     | >gb AAK25760.1  ribosomal protein L33 [Castanea sativa]                                                                                                                                                                                                                                                                                                                                                                                                                                                                                                                                                                                                                                                 | 112   | 4E-50   |
| BM351629              | 1.33E-02        | F1<B73=Mo17         | 3.91                     | 7                   | ns                                                                                                                                                                                                                                                                                                                                                                                                                                                                                                                                                                                                                                                                                                      |       |         |
| CB380586              | 1.33E-02        | Mo17<B73=F1         | 1.24                     | 11                  | >ref XP_464199.1  putative ribosomal protein S14 [Oryza sativa (japonica cultivar-group)] ref XP_506724.1  PREDICTED OJ9003_G05.34 gene product [Oryza sativa (japonica cultivar-group)] dbj BAD25218.1  putative ribosomal protein S14 [Oryza sativa (japonica cultivar-group)]                                                                                                                                                                                                                                                                                                                                                                                                                        | 150   | 8E-63   |
|                       |                 |                     |                          |                     | >ref XP_472410.1  OJ000126_13.9 [Oryza sativa (japonica cultivar-group)]emb CAE02065.2  OJ000126_13.9 [Oryza sativa (japonica cultivar-group)] dbj BAD29299.1  40S ribosomal protein S14 [Oryza sativa (japonica cultivar-group)] dbj BAD27798.1  40S ribosomal protein S14 [Oryza sativa (japonica cultivar-group)]                                                                                                                                                                                                                                                                                                                                                                                    | 151   | 9E-62   |
|                       |                 |                     |                          |                     | >sp P19950 RS141 MAIZE 40S ribosomal protein S14 (Clone MCH1)                                                                                                                                                                                                                                                                                                                                                                                                                                                                                                                                                                                                                                           | 149   | 4E-61   |
|                       |                 |                     |                          |                     | >gb AAO41731.1  cytoplasmic ribosomal protein S14 [Brassica napus]                                                                                                                                                                                                                                                                                                                                                                                                                                                                                                                                                                                                                                      | 150   | 4E-60   |
|                       |                 |                     |                          |                     | >gb ABC01912.1  ribosomal protein S14-like protein [Solanum tuberosum]gb ABB87124.1  hypothetical protein [Solanum tuberosum]                                                                                                                                                                                                                                                                                                                                                                                                                                                                                                                                                                           | 150   | 1E-59   |
| CD527831              | 1.34E-02        | Mo17<B73            | 1.32                     | 9                   | >dbj BAB89354.1  ubiquitin-conjugating enzyme OsUBC5a [Oryza sativa (japonica cultivar-group)]                                                                                                                                                                                                                                                                                                                                                                                                                                                                                                                                                                                                          | 147   | 4E-84   |
|                       |                 |                     |                          |                     | >emb CAI29540.1  ubiquitin conjugating enzyme E2 [Oryza sativa (indicacultivar-group)]                                                                                                                                                                                                                                                                                                                                                                                                                                                                                                                                                                                                                  | 147   | 6E-84   |
|                       |                 |                     |                          |                     | >ref NP_567791.1  UBC9 (UBIQUITIN CONJUGATING ENZYME 9); ubiquitin conjugatingenzyme/ ubiquitin-like activating enzyme [Arabidopsis thaliana] gb AA44849.1  ubiquitinating enzyme [Arabidopsis thaliana]                                                                                                                                                                                                                                                                                                                                                                                                                                                                                                | 178   | 5E-81   |
|                       |                 |                     |                          |                     | >gb AAG40371.1  AT4g27960 [Arabidopsis thaliana]                                                                                                                                                                                                                                                                                                                                                                                                                                                                                                                                                                                                                                                        | 178   | 5E-81   |
|                       |                 |                     |                          |                     | >ref NP_849462.1  UBC9 (UBIQUITIN CONJUGATING ENZYME 9); ubiquitin conjugatingenzyme/ ubiquitin-like activating enzyme [Arabidopsis thaliana] emb CAA78714.1  ubiquitin conjugating enzyme homolog [Arabidopsis thaliana] emb CAA51201.1  ubiquitin conjugating enzyme E2 [Arabidopsis thaliana] emb CAB79598.1  ubiquitin-protein ligase UBC9 [Arabidopsis thaliana] emb CAB36765.1  ubiquitin-protein ligase UBC9 [Arabidopsis thaliana] gb AAN13102.1  E2 ubiquitin-conjugating enzyme 9 (UBC9) [Arabidopsis thaliana] sp P35132 UBC9_ARATH Ubiquitin-conjugating enzyme E2-17 kDa 9 (Ubiquitin-protein ligase 9) (Ubiquitin carrier protein 9) (UBCAT4B) gb AA32894.1  ubiquitin conjugating enzyme | 148   | 2E-80   |
| CD484889              | 1.34E-02        | B73<F1=Mo17         | 1.25                     | 2                   | >ref NP_915412.1  putative histone H2B [Oryza sativa (japonica cultivar-group)]dbj BAB93209.1  putative histone H2B [Oryza sativa (japonica cultivar-group)] dbj BAB67889.1  putative histone H2B [Oryza sativa (japonica cultivar-group)]                                                                                                                                                                                                                                                                                                                                                                                                                                                              | 139   | 4E-36   |
|                       |                 |                     |                          |                     | >ref XP_483094.1  putative Histone H2B.2 [Oryza sativa (japonica cultivar-group)]dbj BAD09673.1  putative Histone H2B.2 [Oryza sativa (japonica cultivar-group)]                                                                                                                                                                                                                                                                                                                                                                                                                                                                                                                                        | 150   | 4E-36   |
|                       |                 |                     |                          |                     | >sp P05621 H2B2 WHEAT Histone H2B.2                                                                                                                                                                                                                                                                                                                                                                                                                                                                                                                                                                                                                                                                     | 149   | 4E-36   |
|                       |                 |                     |                          |                     | >emb CAA42530.1  histone H2B [Triticum aestivum]sp P27807 H2B1 WHEAT Histone H2B                                                                                                                                                                                                                                                                                                                                                                                                                                                                                                                                                                                                                        | 152   | 4E-36   |

**Table 4. Microarray analysis results, mode of gene action classification, and BLAST annotation for the 1,367 ESTs identified as differentially expressed among genotypes (15% FDR)**

| GenBank accession no. | Overall P value | Significant pattern | Fold change <sup>†</sup> | Sector <sup>‡</sup> | BLAST annotation*                                                                                                                                                                                                                                                                                                                                    | Score | E value |
|-----------------------|-----------------|---------------------|--------------------------|---------------------|------------------------------------------------------------------------------------------------------------------------------------------------------------------------------------------------------------------------------------------------------------------------------------------------------------------------------------------------------|-------|---------|
| CB240025              | 1.35E-02        | B73<F1<Mo17         | 1.47                     | 4                   | >emb CAA49585.1  H2B histone [Zea mays]sp P49120 H2B4 MAIZE Histone H2B.4                                                                                                                                                                                                                                                                            | 137   | 4E-36   |
|                       |                 |                     |                          |                     | >emb CAA41024.1  acyl carrier protein [Zea mays]prf 1814481A acyl carrier protein                                                                                                                                                                                                                                                                    | 121   | 1E-57   |
|                       |                 |                     |                          |                     | >sp P15543 ACP3 HORVU Acyl carrier protein 3, chloroplast precursor (Acyl carrier proteinIII) (ACP III) gb AAA32922.1  acyl carrier protein III                                                                                                                                                                                                      | 132   | 4E-48   |
|                       |                 |                     |                          |                     | >ref XP_483668.1  putative acyl carrier protein III, chloroplast precursor (ACP III)[Oryza sativa (japonica cultivar-group)] dbj BAD08953.1  putative acyl carrier protein III, chloroplast precursor (ACP III) [Oryza sativa (japonica cultivar-group)]                                                                                             | 138   | 2E-45   |
|                       |                 |                     |                          |                     | >sp P08817 ACP2_HORVU Acyl carrier protein 2, chloroplast precursor (Acyl carrier proteinII) (ACP II) gb AAA32921.1  acyl carrier protein II prf 1808324A acyl carrier protein II                                                                                                                                                                    | 129   | 6E-40   |
|                       |                 |                     |                          |                     | >gb AAA32924.1  acyl carrier protein III precursor                                                                                                                                                                                                                                                                                                   | 110   | 1E-36   |
| DV495273              | 1.35E-02        | B73<F1=Mo17         | 1.43                     | 3                   | >ref XP_467311.1  putative DNA topoisomerase II [Oryza sativa (japonica cultivar-group)] dbj BAD07880.1  putative DNA topoisomerase II [Oryza sativa (japonica cultivar-group)]                                                                                                                                                                      | 1525  | 3E-13   |
| CB605294              | 1.35E-02        | Mo17<B73=F1         | 1.34                     | 11                  | >gb AAC08009.1  DnaJ-related protein ZMDJ1 [Zea mays]                                                                                                                                                                                                                                                                                                | 419   | e-108   |
|                       |                 |                     |                          |                     | >gb AAX95135.1  DnaJ protein, putative [Oryza sativa (japonica cultivar-group)]                                                                                                                                                                                                                                                                      | 416   | e-107   |
|                       |                 |                     |                          |                     | >gb AAU89194.1  DnaJ protein, putative [Oryza sativa (japonica cultivar-group)]gb AAO72551.1  DNAJ-like protein [Oryza sativa (japonica cultivar-group)]                                                                                                                                                                                             | 417   | e-107   |
|                       |                 |                     |                          |                     | >gb AAT75262.1  putative DnaJ like protein [Oryza sativa (japonica cultivar-group)]                                                                                                                                                                                                                                                                  | 417   | 6E-98   |
|                       |                 |                     |                          |                     | >gb ABB16989.1  DnaJ-like protein [Solanum tuberosum]                                                                                                                                                                                                                                                                                                | 419   | 4E-97   |
| DV621818              | 1.35E-02        | B73<F1=Mo17         | 1.43                     | 3                   | >ref NP_916988.1  guanine nucleotide-binding protein beta subunit-like protein (GPB-LR) (RWD) [Oryza sativa (japonica cultivar-group)] dbj BAA07404.1  q group of receptor for activated C-kinase [Oryza sativa (japonica cultivar-group)] sp P49027 GBLP_ORYSA Guanine nucleotide-binding protein beta subunit-like protein (GPB-LR) (RWD)          | 334   | 9E-96   |
|                       |                 |                     |                          |                     | >ref XP_475866.1  putative guanine nucleotide-binding protein beta subunit [Oryzasativa (japonica cultivar-group)] gb AAT85192.1  putative guanine nucleotide binding protein beta subunit [Oryza sativa (japonica cultivar-group)] gb AAT39277.1  putative guanine nucleotide-binding protein beta subunit [Oryza sativa (japonica cultivar-group)] | 336   | 7E-85   |
|                       |                 |                     |                          |                     | >dbj BAA76896.1  LeArcA2 protein [Lycopersicon esculentum]                                                                                                                                                                                                                                                                                           | 326   | 1E-77   |
|                       |                 |                     |                          |                     | >emb CAA96528.1  G protein beta-subunit-like protein [Nicotiana glauca]                                                                                                                                                                                                                                                                              | 328   | 3E-77   |
|                       |                 |                     |                          |                     | >sp P49026 GBLP TOBAC Guanine nucleotide-binding protein beta subunit-like protein dbj BAA04478.1  G protein beta subunit-like protein [Nicotiana tabacum]                                                                                                                                                                                           | 326   | 1E-76   |
| DV496092              | 1.35E-02        | B73=Mo17<F1         | 1.48                     | 12                  | >ref NP_922194.1  putative peroxidase [Oryza sativa (japonica cultivar-group)]gb AAM93690.1  putative peroxidase [Oryza sativa (japonica cultivar-group)]                                                                                                                                                                                            | 344   | 2E-14   |
|                       |                 |                     |                          |                     | >gb ABB47842.1  peroxidase, putative [Oryza sativa (japonica cultivar-group)]                                                                                                                                                                                                                                                                        | 363   | 2E-14   |
| BM080260              | 1.36E-02        | Mo17<B73=F1         | 1.4                      | 11                  | >ref XP_506641.1  PREDICTED P0523B07.38-1 gene product [Oryza sativa (japonica cultivar-group)] ref XP_450347.1  putative polyphosphoinositide binding protein Ssh1 [Oryza sativa (japonica cultivar-group)] dbj BAD23434.1  putative polyphosphoinositide binding protein Ssh1p [Oryza sativa (japonica cultivar-group)]                            | 335   | 8E-44   |
|                       |                 |                     |                          |                     | >gb AAB94598.1  polyphosphoinositide binding protein Ssh1p [Glycine max]                                                                                                                                                                                                                                                                             | 324   | 9E-29   |
|                       |                 |                     |                          |                     | >ref NP_175980.1  transporter [Arabidopsis thaliana]gb AAL84992.1  At1g55840/F14J16_2 [Arabidopsis thaliana] gb AAL31909.1  At1g55840/F14J16_2 [Arabidopsis thaliana]                                                                                                                                                                                | 325   | 1E-26   |
|                       |                 |                     |                          |                     | >gb AAF79312.1  F14J16.8 [Arabidopsis thaliana]                                                                                                                                                                                                                                                                                                      | 344   | 1E-26   |
|                       |                 |                     |                          |                     | >ref NP_199584.1  binding / transporter [Arabidopsis thaliana]dbj BAB11320.1  unnamed protein product [Arabidopsis thaliana]                                                                                                                                                                                                                         | 341   | 1E-25   |
| BM333880              | 1.36E-02        | Mo17<B73=F1         | 1.49                     | 11                  | >ref XP_476878.1  putative auxin-induced protein [Oryza sativa (japonica cultivar-group)] dbj BAC83117.1  putative auxin-induced protein [Oryza sativa (japonica cultivar-group)]                                                                                                                                                                    | 219   | 7E-35   |
|                       |                 |                     |                          |                     | >ref NP_909949.1  putative auxin-induced protein [Oryza sativa (japonica cultivar-group)] gb AAP44680.1  putative auxin-induced protein [Oryza sativa (japonica cultivar-group)]                                                                                                                                                                     | 195   | 1E-32   |
|                       |                 |                     |                          |                     | >gb ABA99794.1  AUX/IAA family [Oryza sativa (japonica cultivar-group)]                                                                                                                                                                                                                                                                              | 197   | 1E-28   |
|                       |                 |                     |                          |                     | >ref XP_468971.1  putative auxin-induced protein [Oryza sativa (japonica cultivar-group)] gb AAS07279.1  putative auxin-induced protein [Oryza sativa (japonica cultivar-group)]                                                                                                                                                                     | 226   | 5E-28   |
|                       |                 |                     |                          |                     | >gb AAD32142.1  Nt-iaa2.3 deduced protein [Nicotiana tabacum]                                                                                                                                                                                                                                                                                        | 179   | 2E-27   |
| CD670180              | 1.36E-02        | Mo17<B73=F1         | 1.34                     | 10                  | ns                                                                                                                                                                                                                                                                                                                                                   |       |         |
| CAB29343              | 1.37E-02        | Mo17<B73=F1         | 1.25                     | 10                  | >ref XP_476648.1  putative ribosomal protein S12 [Oryza sativa (japonica cultivar-group)] dbj BAC82908.1  putative ribosomal protein S12 [Oryza sativa (japonica cultivar-group)]                                                                                                                                                                    | 138   | 6E-12   |
|                       |                 |                     |                          |                     | >ref XP_477173.1  putative 40S ribosomal protein S12 [Oryza sativa (japonica cultivar-group)] dbj BAC20920.1  putative 40S ribosomal protein S12 [Oryza sativa (japonica cultivar-group)]                                                                                                                                                            | 138   | 2E-11   |
|                       |                 |                     |                          |                     | >gb AAD39838.1  ribosomal protein S12 [Hordeum vulgare]sp Q9XHS0 RS12 HORVU 40S ribosomal protein S12                                                                                                                                                                                                                                                | 143   | 7E-11   |
|                       |                 |                     |                          |                     | >ref XP_757465.1  hypothetical protein UM01318.1 [Ustilago maydis 521]gb EAK82181.1  hypothetical protein UM01318.1 [Ustilago maydis 521]                                                                                                                                                                                                            | 145   | 5E-9    |
|                       |                 |                     |                          |                     | >gb AANS2386.1  ribosomal protein S12 [Branchiostoma belcheri]                                                                                                                                                                                                                                                                                       | 132   | 1E-7    |
| CB885605              | 1.37E-02        | B73<F1=Mo17         | 1.31                     | 3                   | >ref NP_912596.1  tubulin beta-4 chain [Oryza sativa (japonica cultivar-group)]dbj BAB64211.1  putative beta-tubulin 4 [Oryza sativa (japonica cultivar-group)]                                                                                                                                                                                      | 447   | 3E-83   |
|                       |                 |                     |                          |                     | sp Q43594 TBB1 ORYSA Tubulin beta-1 chain (Beta-1 tubulin) dbj BAB39951.1  putative tubulin beta-4 chain [Oryza sativa (japonica cultivar-group)]                                                                                                                                                                                                    |       |         |

**Table 4. Microarray analysis results, mode of gene action classification, and BLAST annotation for the 1,367 ESTs identified as differentially expressed among genotypes (15% FDR)**

| GenBank accession no. | Overall P value | Significant pattern | Fold change <sup>†</sup> | Sector <sup>‡</sup> | BLAST annotation*                                                                                                                                                                                                                                                                                                                                                                                                                                                                                  | Score | E value |
|-----------------------|-----------------|---------------------|--------------------------|---------------------|----------------------------------------------------------------------------------------------------------------------------------------------------------------------------------------------------------------------------------------------------------------------------------------------------------------------------------------------------------------------------------------------------------------------------------------------------------------------------------------------------|-------|---------|
|                       |                 |                     |                          |                     | >emb CAA52720.1  beta-5 tubulin [Zea mays]sp Q43697 TBB5 MAIZE Tubulin beta-5 chain (Beta-5 tubulin)                                                                                                                                                                                                                                                                                                                                                                                               | 445   | 3E-83   |
|                       |                 |                     |                          |                     | >sp Q9ZRA8 TBB5 WHEAT Tubulin beta-5 chain (Beta-5 tubulin)gb AAD10492.1  beta-tubulin 5 [Triticum aestivum]                                                                                                                                                                                                                                                                                                                                                                                       | 447   | 3E-83   |
|                       |                 |                     |                          |                     | >sp Q9ZPN7 TBB4 ELEIN Tubulin beta-4 chain (Beta-4 tubulin)gb AAD20181.1  beta-tubulin 4 [Eleusine indica]                                                                                                                                                                                                                                                                                                                                                                                         | 446   | 3E-83   |
|                       |                 |                     |                          |                     | >sp Q9ZRB2 TBB1 WHEAT Tubulin beta-1 chain (Beta-1 tubulin)gb AAD10487.1  beta-tubulin 1 [Triticum aestivum]                                                                                                                                                                                                                                                                                                                                                                                       | 445   | 3E-83   |
| CD650926              | 1.37E-02        | Mo17<B73=F1         | 1.32                     | 11                  | >gb AAR89617.1  40S ribosomal protein S5 [Capsicum annuum]<br>>ref NP_908322.1  putative 40S ribosomal protein S5 [Oryza sativa (japonica cultivar-group)] dbj BAB64234.1  putative 40S ribosomal protein S5 [Oryza sativa (japonica cultivar-group)] dbj BAB62621.1  putative 40S ribosomal protein S5 [Oryza sativa (japonica cultivar-group)]                                                                                                                                                   | 212   | 5E-18   |
|                       |                 |                     |                          |                     | >emb CAA70084.1  40S ribosomal protein S5 [Nicotiana glauca]sp O24111 RS5 NICPL 40S ribosomal protein S5                                                                                                                                                                                                                                                                                                                                                                                           | 154   | 5E-18   |
|                       |                 |                     |                          |                     | >gb ABA93723.1  ribosomal protein S7 [Oryza sativa (japonica cultivar-group)]                                                                                                                                                                                                                                                                                                                                                                                                                      | 199   | 5E-18   |
|                       |                 |                     |                          |                     | >pir S56705 ribosomal protein S5 homolog - common tobacco (fragment)                                                                                                                                                                                                                                                                                                                                                                                                                               | 49    | 5E-18   |
| CB329441              | 1.37E-02        | B73<F1=Mo17         | 1.37                     | 3                   | >gb AAA68209.1  sus1 gene product<br>>sp P49036 SUS2_MAIZE Sucrose synthase 2 (Sucrose-UDP glucosyltransferase 2)gb AAA33515.1  sucrose synthase 2 gb AAA33514.1  UDP-glucose:D-fructose 2-glucosyl-transferase                                                                                                                                                                                                                                                                                    | 816   | e-112   |
|                       |                 |                     |                          |                     | >prf 2008300A sucrose synthase:ISOTYPE=2                                                                                                                                                                                                                                                                                                                                                                                                                                                           | 763   | e-112   |
|                       |                 |                     |                          |                     | >gb AAV64256.2  sucrose synthase [Bambusa oldhamii]                                                                                                                                                                                                                                                                                                                                                                                                                                                | 816   | e-108   |
|                       |                 |                     |                          |                     | >gb AAL50570.1  sucrose synthase [Bambusa oldhamii]                                                                                                                                                                                                                                                                                                                                                                                                                                                | 816   | e-107   |
|                       |                 |                     |                          |                     | >ref NP_912975.1  unnamed protein product [Oryza sativa (japonica cultivar-group)]dbj BAA88176.1  putative zwille protein [Oryza sativa (japonica cultivar-group)]                                                                                                                                                                                                                                                                                                                                 | 904   | 6E-55   |
|                       |                 |                     |                          |                     | >gb ABC61505.1  AGO4-2 [Nicotiana benthamiana]                                                                                                                                                                                                                                                                                                                                                                                                                                                     | 905   | 3E-52   |
|                       |                 |                     |                          |                     | >gb ABC61504.1  AGO4-1 [Nicotiana benthamiana]                                                                                                                                                                                                                                                                                                                                                                                                                                                     | 912   | 6E-50   |
|                       |                 |                     |                          |                     | >dbj BAD94152.1  zwille/pinhead-like protein [Arabidopsis thaliana]                                                                                                                                                                                                                                                                                                                                                                                                                                | 580   | 3E-49   |
|                       |                 |                     |                          |                     | >gb AAO73892.1  PAZ (Pwi Argonaut and Zwillie) family [Arabidopsis thaliana]                                                                                                                                                                                                                                                                                                                                                                                                                       | 892   | 3E-49   |
| BG841775              | 1.38E-02        | Mo17<B73            | 2.39                     | 9                   | ns                                                                                                                                                                                                                                                                                                                                                                                                                                                                                                 |       |         |
| CB604549              | 1.38E-02        | Mo17<F1             | 1.23                     | 12                  | >emb CAA46876.1  DNA-binding protein [Zea mays]pir T03640 high mobility group protein MNB1b - maize (fragment)<br>>gb AAM95942.1  nucleosome/chromatin assembly factor group D protein [Zea mays]emb CAA41220.1  high mobility group protein [Zea mays]<br>emb CAB46752.1  HMGa protein [Zea mays] sp P27347 MNB1B MAIZE DNA-binding protein MNB1B (HMG1-like protein)                                                                                                                             | 168   | 1E-22   |
|                       |                 |                     |                          |                     | >gb AAP21609.1  HMGB1 [Oryza sativa (indica cultivar-group)]gb AAN28722.1  HMG1 protein [Oryza sativa (indica cultivar-group)] dbj BAD61823.1  HMGB1 [Oryza sativa (japonica cultivar-group)] gb AAC78104.1  high mobility group protein [Oryza sativa]                                                                                                                                                                                                                                            | 157   | 4E-22   |
|                       |                 |                     |                          |                     | >emb CAA7764.1  high mobility group protein [Triticum aestivum]sp P40621 HMGL WHEAT HMG1/2-like protein                                                                                                                                                                                                                                                                                                                                                                                            | 161   | 3E-20   |
|                       |                 |                     |                          |                     | >emb CAA90679.1  HMG1/2-like protein [Hordeum vulgare subsp. vulgare]                                                                                                                                                                                                                                                                                                                                                                                                                              | 160   | 2E-19   |
|                       |                 |                     |                          |                     | >ref XP_480842.1  putative 60S ribosomal protein L7 [Oryza sativa (japonica cultivar-group)] dbj BAD03800.1  putative 60S ribosomal protein L7 [Oryza sativa (japonica cultivar-group)]                                                                                                                                                                                                                                                                                                            | 245   | 1E-81   |
|                       |                 |                     |                          |                     | >ref XP_473801.1  OSJNBb0015N08.13 [Oryza sativa (japonica cultivar-group)]emb CAE03885.2  OSJNBb0015N08.13 [Oryza sativa (japonica cultivar-group)]<br>emb CAE02124.2  OSJNBa0035M09.3 [Oryza sativa (japonica cultivar-group)]                                                                                                                                                                                                                                                                   | 250   | 3E-79   |
|                       |                 |                     |                          |                     | >gb AAW50989.1  ribosomal protein L7 [Triticum aestivum]                                                                                                                                                                                                                                                                                                                                                                                                                                           | 244   | 3E-74   |
|                       |                 |                     |                          |                     | >ref NP_974305.1  structural constituent of ribosome / transcription regulator [Arabidopsis thaliana] ref NP_974304.1  structural constituent of ribosome / transcription regulator [Arabidopsis thaliana] gb AAL76153.1  AT3g13580/K20M4_2 [Arabidopsis thaliana] gb AAL06999.1  AT3g13580/K20M4_2 [Arabidopsis thaliana] gb AAK64004.1  AT3g13580/K20M4_2 [Arabidopsis thaliana] dbj BAB02600.1  60S ribosomal protein L7 [Arabidopsis thaliana] sp Q9LHP1 RL73 ARATH 60S ribosomal protein L7-3 | 244   | 1E-69   |
|                       |                 |                     |                          |                     | >gb ABBI6984.1  thaliana 60S ribosomal protein L7 (At2g44120) [Solanum tuberosum]                                                                                                                                                                                                                                                                                                                                                                                                                  | 242   | 3E-69   |
|                       |                 |                     |                          |                     | >ref XP_464199.1  putative ribosomal protein S14 [Oryza sativa (japonica cultivar-group)] ref XP_506724.1  PREDICTED OJ9003_G05.34 gene product [Oryza sativa (japonica cultivar-group)] dbj BAD25218.1  putative ribosomal protein S14 [Oryza sativa (japonica cultivar-group)]                                                                                                                                                                                                                   | 150   | 8E-63   |
|                       |                 |                     |                          |                     | >ref XP_472410.1  OJ000126_13.9 [Oryza sativa (japonica cultivar-group)]emb CAE02065.2  OJ000126_13.9 [Oryza sativa (japonica cultivar-group)]<br>dbj BAD29299.1  40S ribosomal protein S14 [Oryza sativa (japonica cultivar-group)] dbj BAD27798.1  40S ribosomal protein S14 [Oryza sativa (japonica cultivar-group)]                                                                                                                                                                            | 151   | 9E-62   |
|                       |                 |                     |                          |                     | >sp P19950 RS141 MAIZE 40S ribosomal protein S14 (Clone MCH1)                                                                                                                                                                                                                                                                                                                                                                                                                                      | 149   | 4E-61   |
|                       |                 |                     |                          |                     | >gb AAO41731.1  cytoplasmic ribosomal protein S14 [Brassica napus]                                                                                                                                                                                                                                                                                                                                                                                                                                 | 150   | 4E-60   |
|                       |                 |                     |                          |                     | >gb ABC01912.1  ribosomal protein S14-like protein [Solanum tuberosum]gb ABB87124.1  hypothetical protein [Solanum tuberosum]                                                                                                                                                                                                                                                                                                                                                                      | 150   | 1E-59   |
|                       |                 |                     |                          |                     | >ref NP_913796.1  thioredoxin-like [Oryza sativa (japonica cultivar-group)]ref XP_507213.1  PREDICTED OSJNBb0011E04.120 gene product [Oryza sativa (japonica cultivar-group)] dbj BAD05405.1  thioredoxin-like [Oryza sativa (japonica cultivar-group)] dbj BAC22569.1  thioredoxin-like [Oryza sativa (japonica cultivar-group)]                                                                                                                                                                  | 189   | 4E-41   |
|                       |                 |                     |                          |                     | >gb AAF75752.1  putative thioredoxin [Lycopersicon esculentum]                                                                                                                                                                                                                                                                                                                                                                                                                                     | 175   | 3E-37   |
|                       |                 |                     |                          |                     | >gb AAS80320.1  thioredoxin protein [Nicotiana benthamiana]                                                                                                                                                                                                                                                                                                                                                                                                                                        | 181   | 6E-37   |
| BM073362              | 1.38E-02        | Mo17<B73            | 1.35                     | 10                  |                                                                                                                                                                                                                                                                                                                                                                                                                                                                                                    |       |         |

**Table 4. Microarray analysis results, mode of gene action classification, and BLAST annotation for the 1,367 ESTs identified as differentially expressed among genotypes (15% FDR)**

| GenBank accession no. | Overall P value | Significant pattern | Fold change <sup>†</sup> | Sector <sup>‡</sup> | BLAST annotation*                                                                                                                                                                        | Score | E value |
|-----------------------|-----------------|---------------------|--------------------------|---------------------|------------------------------------------------------------------------------------------------------------------------------------------------------------------------------------------|-------|---------|
|                       |                 |                     |                          |                     | >gb AAS80319.1  thioredoxin protein [Nicotiana benthamiana]                                                                                                                              | 181   | 2E-36   |
|                       |                 |                     |                          |                     | >gb AAM61520.1  thioredoxin, putative [Arabidopsis thaliana]                                                                                                                             | 183   | 5E-36   |
| DV621299              | 1.38E-02        | B73<Mo17            | 1.39                     | 4                   | >gb AAT77062.1  expressed protein [Oryza sativa (japonica cultivar-group)]                                                                                                               | 241   | 6E-31   |
| BM074510              | 1.39E-02        | B73<F1              | 1.44                     | 2                   | >ref XP_475366.1  putative ubiquitin-conjugating enzyme E2 [Oryza sativa (japonica cultivar-group)]                                                                                      | 169   | 4E-41   |
|                       |                 |                     |                          |                     | [Oryza sativa (japonica cultivar-group)]                                                                                                                                                 | 169   | 7E-41   |
|                       |                 |                     |                          |                     | >emb CAA05772.1  Ubiquitin carrier protein [Zea mays]                                                                                                                                    | 169   | 2E-40   |
|                       |                 |                     |                          |                     | >ref NP_915413.1  putative Ubiquitin carrier protein UBC7 [Oryza sativa (japonica cultivar-group)]                                                                                       | 169   | 1E-39   |
|                       |                 |                     |                          |                     | [Oryza sativa (japonica cultivar-group)] dbj BAB67890.1  putative ubiquitin carrier protein UBC7 [Oryza sativa (japonica cultivar-group)]                                                | 198   | 2E-39   |
|                       |                 |                     |                          |                     | >gb AAC12662.1  ubiquitin-conjugating enzyme protein E2 [Zea mays]                                                                                                                       |       |         |
|                       |                 |                     |                          |                     | >ref NP_568902.1  UBC7; ubiquitin conjugating enzyme [Arabidopsis thaliana]                                                                                                              |       |         |
| DV622656              | 1.39E-02        | B73=F1<Mo17         | 1.45                     | 5                   | >ref XP_473275.1  OSJNBa0074L08.23 [Oryza sativa (japonica cultivar-group)]                                                                                                              | 770   | 2E-75   |
|                       |                 |                     |                          |                     | emb CAD41212.2  OSJNBa0074L08.23 [Oryza sativa (japonica cultivar-group)]                                                                                                                |       |         |
|                       |                 |                     |                          |                     | >ref NP_196618.1  hydrolase, hydrolyzing O-glycosyl compounds [Arabidopsis thaliana]                                                                                                     | 792   | 3E-43   |
|                       |                 |                     |                          |                     | emb CAB89387.1  beta-xylosidase-like protein [Arabidopsis thaliana]                                                                                                                      | 732   | 3E-43   |
|                       |                 |                     |                          |                     | gb AAL09717.1  AT5g10560/F12B17_90 [Arabidopsis thaliana]                                                                                                                                | 573   | 2E-42   |
|                       |                 |                     |                          |                     | >dbj BAC41913.1  putative beta-xylosidase [Arabidopsis thaliana]                                                                                                                         | 777   | 9E-42   |
|                       |                 |                     |                          |                     | >dbj BAD06320.1  putative beta-xylosidase [Triticum aestivum]                                                                                                                            |       |         |
|                       |                 |                     |                          |                     | >gb AAK38482.1  beta-D-xylosidase [Hordeum vulgare]                                                                                                                                      |       |         |
| CB604350              | 1.40E-02        | B73=F1<Mo17         | 1.35                     | 4                   | >ref XP_472193.1  OSJNBb0006N15.8 [Oryza sativa (japonica cultivar-group)]                                                                                                               | 123   | 5E-48   |
|                       |                 |                     |                          |                     | emb CAE04591.2  OSJNBb0006N15.8 [Oryza sativa (japonica cultivar-group)]                                                                                                                 |       |         |
|                       |                 |                     |                          |                     | >ref XP_507485.1  PREDICTED OJ1126_B06.24 gene product [Oryza sativa (japonica cultivar-group)]                                                                                          |       |         |
|                       |                 |                     |                          |                     | ref XP_465859.1  putative 60S ribosomal protein L35 [Oryza sativa (japonica cultivar-group)]                                                                                             |       |         |
|                       |                 |                     |                          |                     | ref XP_506809.1  PREDICTED OJ1126_B06.24 gene product [Oryza sativa (japonica cultivar-group)]                                                                                           |       |         |
|                       |                 |                     |                          |                     | dbj BAD22912.1  putative 60S ribosomal protein L35 [Oryza sativa (japonica cultivar-group)]                                                                                              | 123   | 8E-47   |
|                       |                 |                     |                          |                     | dbj BAD23213.1  putative 60S ribosomal protein L35 [Oryza sativa (japonica cultivar-group)]                                                                                              |       |         |
|                       |                 |                     |                          |                     | >ref NP_195881.1  structural constituent of ribosome [Arabidopsis thaliana]                                                                                                              | 123   | 6E-44   |
|                       |                 |                     |                          |                     | emb CAB85998.1  ribosomal protein L35-like [Arabidopsis thaliana]                                                                                                                        |       |         |
|                       |                 |                     |                          |                     | gb AAQ22651.1  At5g02610 [Arabidopsis thaliana] sp Q9LZ41 RL354 ARATH 60S ribosomal protein L35-4 pir T48282 ribosomal protein L35-like - Arabidopsis thaliana                           |       |         |
|                       |                 |                     |                          |                     | >ref NP_181471.1  structural constituent of ribosome [Arabidopsis thaliana]                                                                                                              |       |         |
|                       |                 |                     |                          |                     | gb AAL34210.1  putative 60S ribosomal protein L35 [Arabidopsis thaliana]                                                                                                                 |       |         |
|                       |                 |                     |                          |                     | gb AAK59609.1  putative 60S ribosomal protein L35 [Arabidopsis thaliana]                                                                                                                 |       |         |
|                       |                 |                     |                          |                     | gb AAC27830.1  60S ribosomal protein L35 [Arabidopsis thaliana]                                                                                                                          |       |         |
|                       |                 |                     |                          |                     | gb AAM61292.1  60S ribosomal protein L35 [Arabidopsis thaliana] pir T00549 60S ribosomal protein L35 [imported] - Arabidopsis thaliana sp O80626 RL352_ARATH 60S ribosomal protein L35-1 | 123   | 7E-43   |
|                       |                 |                     |                          |                     | >ref NP_187561.1  structural constituent of ribosome [Arabidopsis thaliana]                                                                                                              |       |         |
|                       |                 |                     |                          |                     | gb AAM64363.1  putative 60S ribosomal protein L35 [Arabidopsis thaliana]                                                                                                                 |       |         |
|                       |                 |                     |                          |                     | gb AAF23282.1  putative 60S ribosomal protein L35 [Arabidopsis thaliana]                                                                                                                 |       |         |
|                       |                 |                     |                          |                     | gb AAO50471.1  putative 60S ribosomal protein L35 [Arabidopsis thaliana]                                                                                                                 |       |         |
|                       |                 |                     |                          |                     | gb AAO42195.1  putative 60S ribosomal protein L35 [Arabidopsis thaliana] sp Q9SF53 RL351 ARATH 60S ribosomal protein L35-2                                                               | 123   | 1E-42   |
| DV492564              | 1.40E-02        | B73=F1<Mo17         | 1.37                     | 5                   | >gb AAR91093.1  hypothetical protein [Zea mays]                                                                                                                                          | 140   | 3E-62   |
|                       |                 |                     |                          |                     | >gb AAR91173.1  hypothetical protein [Zea mays]                                                                                                                                          | 101   | 1E-41   |
| DV942454              | 1.41E-02        | F1<Mo17             | 1.38                     | 6                   | ns                                                                                                                                                                                       |       |         |
| BM078533              | 1.41E-02        | Mo17<B73=F1         | 1.39                     | 11                  | >gb ABA99526.1  universal stress protein family [Oryza sativa (japonica cultivar-group)]                                                                                                 | 169   | 1E-63   |
|                       |                 |                     |                          |                     | >gb ABA99525.1  hypothetical protein LOC_Os12g36630 [Oryza sativa (japonica cultivar-group)]                                                                                             | 160   | 1E-54   |
|                       |                 |                     |                          |                     | >gb AAR07598.1  fiber protein Fb19 [Gossypium barbadense]                                                                                                                                | 151   | 3E-50   |
|                       |                 |                     |                          |                     | >ref NP_566108.1  unknown protein [Arabidopsis thaliana]                                                                                                                                 |       |         |
|                       |                 |                     |                          |                     | gb AAC63627.1  expressed protein [Arabidopsis thaliana]                                                                                                                                  |       |         |
|                       |                 |                     |                          |                     | gb AAM10097.1  unknown protein [Arabidopsis thaliana]                                                                                                                                    | 162   | 2E-47   |
|                       |                 |                     |                          |                     | gb AAK96811.1  Unknown protein [Arabidopsis thaliana]                                                                                                                                    | 162   | 1E-46   |
| CD528028              | 1.41E-02        | B73<F1=Mo17         | 1.51                     | 3                   | >dbj BAD35901.1  putative Erwinia induced protein 1 [Oryza sativa (japonica cultivar-group)]                                                                                             | 409   | 6E-48   |
|                       |                 |                     |                          |                     | >gb AAT99435.1  LysM-domain GPI-anchored protein [Oryza sativa (japonica cultivar-group)]                                                                                                | 409   | 8E-47   |
|                       |                 |                     |                          |                     | >dbj BAD38221.1  putative Erwinia induced protein 1 [Oryza sativa (japonica cultivar-group)]                                                                                             |       |         |
|                       |                 |                     |                          |                     | dbj BAD38015.1  putative Erwinia induced protein 1 [Oryza sativa (japonica cultivar-group)]                                                                                              | 401   | 4E-31   |
|                       |                 |                     |                          |                     | >ref NP_564153.1  unknown protein [Arabidopsis thaliana]                                                                                                                                 |       |         |
|                       |                 |                     |                          |                     | gb AAU90072.1  At1g21880 [Arabidopsis thaliana]                                                                                                                                          |       |         |
|                       |                 |                     |                          |                     | gb AAL09782.1  At1g21880/T26F17_5 [Arabidopsis thaliana]                                                                                                                                 |       |         |
|                       |                 |                     |                          |                     | sp Q93ZH0 LYM1 ARATH LysM domain GPI-anchored protein 1 precursor                                                                                                                        | 416   | 2E-30   |
|                       |                 |                     |                          |                     | >ref NP_177886.2  unknown protein [Arabidopsis thaliana]                                                                                                                                 |       |         |
|                       |                 |                     |                          |                     | gb AAR24663.1  At1g77630 [Arabidopsis thaliana]                                                                                                                                          |       |         |
|                       |                 |                     |                          |                     | dbj BAD44532.1  predicted GPI-anchored protein [Arabidopsis thaliana]                                                                                                                    | 423   | 5E-27   |
| DV943329              | 1.41E-02        | Mo17<B73            | 1.36                     | 10                  | >dbj BAD28019.1  unknown protein [Oryza sativa (japonica cultivar-group)]                                                                                                                | 185   | 4E-49   |
|                       |                 |                     |                          |                     | >ref NP_565561.1  unknown protein [Arabidopsis thaliana]                                                                                                                                 |       |         |
|                       |                 |                     |                          |                     | gb AAC63670.2  expressed protein [Arabidopsis thaliana]                                                                                                                                  |       |         |
|                       |                 |                     |                          |                     | gb AAM10301.1  At2g24020/T29E15.22 [Arabidopsis thaliana]                                                                                                                                | 182   | 1E-41   |
|                       |                 |                     |                          |                     | gb AAK82497.1  At2g24020/T29E15.22 [Arabidopsis thaliana]                                                                                                                                |       |         |
|                       |                 |                     |                          |                     | >gb AAV84522.1  At4g30620 [Arabidopsis thaliana]                                                                                                                                         |       |         |
|                       |                 |                     |                          |                     | ref NP_194791.1  unknown protein [Arabidopsis thaliana]                                                                                                                                  |       |         |
|                       |                 |                     |                          |                     | emb CAB79780.1  putative protein [Arabidopsis thaliana]                                                                                                                                  | 180   | 5E-40   |
|                       |                 |                     |                          |                     | gb AAL75890.1  AT4g30620/F17I23_40 [Arabidopsis thaliana]                                                                                                                                |       |         |



**Table 4. Microarray analysis results, mode of gene action classification, and BLAST annotation for the 1,367 ESTs identified as differentially expressed among genotypes (15% FDR)**

| GenBank accession no. | Overall P value | Significant pattern | Fold change <sup>±</sup> | Sector <sup>±</sup> | BLAST annotation*                                                                                                                                                                                                                                                                                                                                       | Score | E value |
|-----------------------|-----------------|---------------------|--------------------------|---------------------|---------------------------------------------------------------------------------------------------------------------------------------------------------------------------------------------------------------------------------------------------------------------------------------------------------------------------------------------------------|-------|---------|
|                       |                 |                     |                          |                     | >gb AAP89016.1  complex interacting protein 9 [Arabidopsis thaliana]gb AAM62959.1  unknown [Arabidopsis thaliana]                                                                                                                                                                                                                                       | 180   | 5E-40   |
|                       |                 |                     |                          |                     | >gb AAO32624.1  CR084 protein [Chlamydomonas reinhardtii]                                                                                                                                                                                                                                                                                               | 157   | 3E-24   |
| DV943300              | 1.42E-02        | B73<Mo17            | 1.61                     | 3                   | >sp Q43270 PLDA1_MAIZE Phospholipase D alpha 1 (PLD alpha 1) (Choline phosphatase 1)(Phosphatidylcholine-hydrolyzing phospholipase D 1)                                                                                                                                                                                                                 | 812   | 3E-17   |
|                       |                 |                     |                          |                     | dbj BAA11135.1  phospholipase D [Zea mays]                                                                                                                                                                                                                                                                                                              | 812   | 1E-14   |
|                       |                 |                     |                          |                     | >dbj BAA19467.1  phospholipase D [Oryza sativa (japonica cultivar-group)]sp Q43007 PLDA1_ORYSA Phospholipase D alpha 1 precursor (PLD alpha 1) (Choline phosphatase 1) (Phosphatidylcholine-hydrolyzing phospholipase D 1) dbj BAA11136.1  phospholipase D [Oryza sativa (japonica cultivar-group)]                                                     | 809   | 2E-12   |
|                       |                 |                     |                          |                     | >gb AAB51392.1  phospholipase D [Vigna unguiculata]sp O04865 PLDA1_VIGUN Phospholipase D alpha 1 (PLD alpha 1) (Choline phosphatase 1) (Phosphatidylcholine-hydrolyzing phospholipase D 1)                                                                                                                                                              | 810   | 1E-11   |
|                       |                 |                     |                          |                     | >ref NP_175666.1  PLDALPHA2 (PHOSPHOLIPASE D ALPHA 2); phospholipase D [Arabidopsisthaliana] gb AAD55607.1  Similar to gb AF090445 phospholipase D1 from Brassica oleracea. [Arabidopsis thaliana] sp Q9SSQ9 PLDA2_ARATH Phospholipase D alpha 2 (AtPLDalpa2) (PLD alpha 2) (Choline phosphatase 2) (Phosphatidylcholine-hydrolyzing phospholipase D 2) | 809   | 3E-11   |
|                       |                 |                     |                          |                     | >gb AAG45485.1  phospholipase PLDa1 [Lycopersicon esculentum]                                                                                                                                                                                                                                                                                           | 413   | 6E-39   |
| DV490072              | 1.42E-02        | B73<Mo17            | 1.35                     | 3                   | >ref XP_473247.1  OSJNBa0038010.19 [Oryza sativa (japonica cultivar-group)]emb CAE05653.2  OSJNBa0038010.19 [Oryza sativa (japonica cultivar-group)]                                                                                                                                                                                                    | 170   | 9E-29   |
|                       |                 |                     |                          |                     | >dbj BAD93817.1  hypothetical protein [Arabidopsis thaliana]                                                                                                                                                                                                                                                                                            | 405   | 9E-29   |
|                       |                 |                     |                          |                     | >gb AAZ25464.1  At1g17940 [Arabidopsis thaliana]gb AAF97273.1  F2H15.16 [Arabidopsis thaliana]                                                                                                                                                                                                                                                          | 394   | 9E-29   |
|                       |                 |                     |                          |                     | >ref NP_173236.1  unknown protein [Arabidopsis thaliana]                                                                                                                                                                                                                                                                                                | 405   | 9E-29   |
|                       |                 |                     |                          |                     | >gb AAZ23936.1  At1g17940 [Arabidopsis thaliana]                                                                                                                                                                                                                                                                                                        |       |         |
| DV551015              | 1.42E-02        | Mo17<B73            | 1.59                     | 10                  | ns                                                                                                                                                                                                                                                                                                                                                      |       |         |
| CD527746              | 1.42E-02        | Mo17<B73            | 1.24                     | 10                  | >gb AAG36870.1  protein kinase CK2 regulatory subunit CK2B2 [Zea mays]                                                                                                                                                                                                                                                                                  | 260   | 3E-65   |
|                       |                 |                     |                          |                     | >gb ABB47995.1  casein kinase II beta subunit, putative [Oryza sativa (japonicaacultivar-group)]                                                                                                                                                                                                                                                        | 233   | 1E-55   |
|                       |                 |                     |                          |                     | >gb ABB47994.1  casein kinase II beta subunit, putative [Oryza sativa (japonicaacultivar-group)]                                                                                                                                                                                                                                                        | 279   | 1E-55   |
|                       |                 |                     |                          |                     | >ref NP_922762.1  putative casein kinase II beta subunit [Oryza sativa (japonicaacultivar-group)] gb AAG60201.1  putative casein kinase II beta subunit [Oryza sativa] gb AAP55049.1  casein kinase II beta subunit, putative [Oryza sativa (japonica cultivar-group)]                                                                                  | 280   | 3E-54   |
|                       |                 |                     |                          |                     | >gb AAG36871.1  protein kinase CK2 regulatory subunit CK2B3 [Zea mays]                                                                                                                                                                                                                                                                                  | 273   | 1E-44   |
| CD001162              | 1.42E-02        | Mo17<B73=F1         | 1.32                     | 10                  | >ref XP_483838.1  glutaredoxin protein family-like [Oryza sativa (japonicaacultivar-group)] dbj BAD10332.1  glutaredoxin protein family-like [Oryza sativa (japonica cultivar-group)] dbj BAD12949.1  glutaredoxin protein family-like [Oryza sativa (japonica cultivar-group)]                                                                         | 152   | 4E-23   |
|                       |                 |                     |                          |                     | >ref XP_483837.1  glutaredoxin protein family-like [Oryza sativa (japonicaacultivar-group)] dbj BAD10333.1  glutaredoxin protein family-like [Oryza sativa (japonica cultivar-group)] dbj BAC56010.1  glutaredoxin protein family-like [Oryza sativa (japonica cultivar-group)]                                                                         | 164   | 4E-23   |
|                       |                 |                     |                          |                     | >emb CAB81461.1  putative protein [Arabidopsis thaliana]emb CAA22979.1  putative protein [Arabidopsis thaliana]                                                                                                                                                                                                                                         | 176   | 4E-15   |
|                       |                 |                     |                          |                     | >ref NP_194602.2  electron transporter/ thiol-disulfide exchange intermediate[Arabidopsis thaliana] gb AAO39931.1  At4g28730 [Arabidopsis thaliana] dbj BAC43267.1  unknown protein [Arabidopsis thaliana]                                                                                                                                              | 174   | 4E-15   |
|                       |                 |                     |                          |                     | >ref NP_179617.1  arsenate reductase (glutaredoxin)/ electron transporter/thiol-disulfide exchange intermediate [Arabidopsis thaliana] gb AAM67430.1  At2g20270/F11A3.18 [Arabidopsis thaliana] gb AAM19817.1  At2g20270/F11A3.18 [Arabidopsis thaliana] gb AAD21761.1  putative glutaredoxin [Arabidopsis thaliana]                                    | 179   | 1E-12   |
| DV491721              | 1.43E-02        | B73<Mo17            | 1.48                     | 4                   | >dbj BAD62124.1  putative oligopeptidase B [Oryza sativa (japonica cultivar-group)]dbj BAD62483.1  putative oligopeptidase B [Oryza sativa (japonica cultivar-group)]                                                                                                                                                                                   | 746   | 5E-57   |
|                       |                 |                     |                          |                     | >ref NP_564567.1  prolyl oligopeptidase/ serine-type endopeptidase/ serine-typepeptidase [Arabidopsis thaliana] gb AAD50051.1  Similar to oligopeptidases [Arabidopsis thaliana] gb AAL84967.1  At1g50380/F14I3_27 [Arabidopsis thaliana]                                                                                                               | 710   | 2E-53   |
|                       |                 |                     |                          |                     | >sp Q59536 PTRB MORLA Protease II (Oligopeptidase B)dbj BAA07460.1  protease II [Moraxella lacunata]                                                                                                                                                                                                                                                    | 690   | 1E-37   |
|                       |                 |                     |                          |                     | >gb AAC80459.1  oligopeptidase B [Trypanosoma brucei brucei]                                                                                                                                                                                                                                                                                            | 715   | 2E-34   |
|                       |                 |                     |                          |                     | >gb EAN80234.1  oligopeptidase b [Trypanosoma brucei]ref XP_829346.1  oligopeptidase b [Trypanosoma brucei]                                                                                                                                                                                                                                             | 715   | 2E-34   |
| CB380544              | 1.43E-02        | B73<F1=Mo17         | 4.69                     | 3                   | >gb AAM95942.1  nucleosome/chromatin assembly factor group D protein [Zea mays]emb CAA41220.1  high mobility group protein [Zea mays]                                                                                                                                                                                                                   | 157   | 1E-18   |
|                       |                 |                     |                          |                     | emb CAB46752.1  HMGa protein [Zea mays] sp P27347 MNB1B MAIZE DNA-binding protein MNB1B (HMG1-like protein)                                                                                                                                                                                                                                             | 168   | 1E-18   |
|                       |                 |                     |                          |                     | >emb CAA46876.1  DNA-binding protein [Zea mays]pir T03640 high mobility group protein MNB1b - maize (fragment)                                                                                                                                                                                                                                          | 157   | 1E-15   |
|                       |                 |                     |                          |                     | >gb AAP21609.1  HMGB1 [Oryza sativa (indica cultivar-group)]gb AAN28722.1  HMG1 protein [Oryza sativa (indica cultivar-group)] dbj BAD61823.1  HMGB1 [Oryza sativa (japonica cultivar-group)] gb AAC78104.1  high mobility group protein [Oryza sativa]                                                                                                 | 161   | 3E-14   |
|                       |                 |                     |                          |                     | >emb CAA77641.1  high mobility group protein [Triticum aestivum]sp P40621 HMGL WHEAT HMG1/2-like protein                                                                                                                                                                                                                                                | 160   | 1E-12   |
|                       |                 |                     |                          |                     | >emb CAA90679.1  HMG1/2-like protein [Hordeum vulgare subsp. vulgare]                                                                                                                                                                                                                                                                                   |       |         |
| CB381703              | 1.43E-02        | Mo17<B73=F1         | 1.38                     | 11                  | >ref NP_917627.1  P0410E03.18 [Oryza sativa (japonica cultivar-group)]dbj BAB21287.1  putative integral membrane Yip1 family protein [Oryza sativa (japonica cultivar-group)]                                                                                                                                                                           | 292   | e-103   |
|                       |                 |                     |                          |                     | >ref NP_198101.2  unknown protein [Arabidopsis thaliana]                                                                                                                                                                                                                                                                                                | 282   | 5E-86   |
|                       |                 |                     |                          |                     | >gb AAF27034.1  unknown protein [Arabidopsis thaliana]                                                                                                                                                                                                                                                                                                  | 280   | 2E-85   |

**Table 4. Microarray analysis results, mode of gene action classification, and BLAST annotation for the 1,367 ESTs identified as differentially expressed among genotypes (15% FDR)**

| GenBank accession no. | Overall P value | Significant pattern | Fold change <sup>†</sup> | Sector <sup>‡</sup> | BLAST annotation*                                                                                                                                                                                                                                                                                                                                                                                                                                                                                                                                                                              | Score | E value |
|-----------------------|-----------------|---------------------|--------------------------|---------------------|------------------------------------------------------------------------------------------------------------------------------------------------------------------------------------------------------------------------------------------------------------------------------------------------------------------------------------------------------------------------------------------------------------------------------------------------------------------------------------------------------------------------------------------------------------------------------------------------|-------|---------|
|                       |                 |                     |                          |                     | >ref NP_187179.2  unknown protein [Arabidopsis thaliana]gb AAO63894.1  unknown protein [Arabidopsis thaliana] dbj BAC43538.1  unknown protein [Arabidopsis thaliana]                                                                                                                                                                                                                                                                                                                                                                                                                           | 281   | 2E-85   |
|                       |                 |                     |                          |                     | >gb AAR24768.1  At5g27490 [Arabidopsis thaliana]gb AAR23733.1  At5g27490 [Arabidopsis thaliana]                                                                                                                                                                                                                                                                                                                                                                                                                                                                                                | 282   | 6E-85   |
| CB833973              | 1.43E-02        | Mo17<B73            | 1.22                     | 9                   | ns                                                                                                                                                                                                                                                                                                                                                                                                                                                                                                                                                                                             |       |         |
| CB411252              | 1.44E-02        | B73<F1=Mo17         | 1.21                     | 2                   | >gb AAR97952.1  rolled leaf1 [Zea mays]                                                                                                                                                                                                                                                                                                                                                                                                                                                                                                                                                        | 840   | 5E-91   |
|                       |                 |                     |                          |                     | >gb AAR04340.1  homeodomain leucine-zipper protein Hox10 [Oryza sativa (japonica cultivar-group)]                                                                                                                                                                                                                                                                                                                                                                                                                                                                                              | 839   | 1E-81   |
|                       |                 |                     |                          |                     | >ref XP_468564.1  Putative homeodomain-leucine zipper protein [Oryza sativa (japonica cultivar-group)] gb AAN61485.1  Putative homeodomain-leucine zipper protein [Oryza sativa (japonica cultivar-group)]                                                                                                                                                                                                                                                                                                                                                                                     | 857   | 1E-81   |
|                       |                 |                     |                          |                     | >gb AAQ98963.1  homeodomain leucine-zipper protein Hox9 [Oryza sativa (japonica cultivar-group)]                                                                                                                                                                                                                                                                                                                                                                                                                                                                                               | 840   | 2E-78   |
|                       |                 |                     |                          |                     | >ref NP_922012.1  putative homeodomain leucine zipper protein [Oryza sativa (japonica cultivar-group)] gb AAK21338.1  putative homeodomain-leucine zipper protein [Oryza sativa (japonica cultivar-group)] gb ABB47795.1  homeodomain-leucine zipper protein, putative [Oryza sativa (japonica cultivar-group)]                                                                                                                                                                                                                                                                                |       |         |
|                       |                 |                     |                          |                     | gb AAP54299.1  homeodomain-leucine zipper protein, putative [Oryza sativa (japonica cultivar-group)]                                                                                                                                                                                                                                                                                                                                                                                                                                                                                           | 840   | 2E-78   |
| BM073285              | 1.44E-02        | Mo17<B73=F1         | 1.35                     | 10                  | >gb AAM61373.1  unknown [Arabidopsis thaliana]                                                                                                                                                                                                                                                                                                                                                                                                                                                                                                                                                 | 274   | 5E-11   |
|                       |                 |                     |                          |                     | >ref NP_568159.1  unknown protein [Arabidopsis thaliana]gb AAM51559.1  putative guanylate cyclase [Arabidopsis thaliana]                                                                                                                                                                                                                                                                                                                                                                                                                                                                       | 274   | 5E-11   |
|                       |                 |                     |                          |                     | >ref NP_974737.1  unknown protein [Arabidopsis thaliana]                                                                                                                                                                                                                                                                                                                                                                                                                                                                                                                                       | 210   | 5E-11   |
|                       |                 |                     |                          |                     | >dbj BAB10798.1  unnamed protein product [Arabidopsis thaliana]                                                                                                                                                                                                                                                                                                                                                                                                                                                                                                                                | 295   | 1E-9    |
| CB616981              | 1.44E-02        | B73<F1=Mo17         | 1.37                     | 3                   | >ref XP_469569.1  actin [Oryza sativa (japonica cultivar-group)]gb AAO38821.1  actin [Oryza sativa (japonica cultivar-group)] dbj BAC76319.1  actin [Oryza sativa (japonica cultivar-group)] sp P13362 ACT1 ORYSA Actin-1                                                                                                                                                                                                                                                                                                                                                                      | 377   | 9E-75   |
|                       |                 |                     |                          |                     | >emb CAA33874.1  actin [Oryza sativa (indica cultivar-group)]                                                                                                                                                                                                                                                                                                                                                                                                                                                                                                                                  | 377   | 9E-75   |
|                       |                 |                     |                          |                     | >emb CAA55923.1  actin [Sorghum bicolor]sp P53504 ACT1 SORBI Actin-1                                                                                                                                                                                                                                                                                                                                                                                                                                                                                                                           | 377   | 4E-74   |
|                       |                 |                     |                          |                     | >emb CAA34356.1  unnamed protein product [Oryza sativa (indica cultivar-group)]                                                                                                                                                                                                                                                                                                                                                                                                                                                                                                                | 377   | 6E-74   |
|                       |                 |                     |                          |                     | >gb AAF40438.1  actin 1 [Avena nuda]                                                                                                                                                                                                                                                                                                                                                                                                                                                                                                                                                           | 377   | 5E-73   |
| CB816608              | 1.45E-02        | B73<Mo17            | 1.37                     | 3                   | >dbj BAD88098.1  putative replication licensing factor MCM4 [Oryza sativa (japonica cultivar-group)]                                                                                                                                                                                                                                                                                                                                                                                                                                                                                           | 911   | 6E-61   |
|                       |                 |                     |                          |                     | >ref NP_918220.1  putative cdc21 protein [Oryza sativa (japonica cultivar-group)]                                                                                                                                                                                                                                                                                                                                                                                                                                                                                                              | 849   | 1E-48   |
|                       |                 |                     |                          |                     | >ref NP_179236.3  ATP binding / DNA binding / DNA-dependent ATPase/nucleoside-triphosphatase/ nucleotide binding [Arabidopsis thaliana]                                                                                                                                                                                                                                                                                                                                                                                                                                                        | 847   | 3E-41   |
|                       |                 |                     |                          |                     | >gb AAD22296.1  putative CDC21 protein [Arabidopsis thaliana]                                                                                                                                                                                                                                                                                                                                                                                                                                                                                                                                  | 720   | 2E-29   |
|                       |                 |                     |                          |                     | >emb CAF98465.1  unnamed protein product [Tetraodon nigroviridis]                                                                                                                                                                                                                                                                                                                                                                                                                                                                                                                              | 934   | 2E-19   |
| CD527296              | 1.45E-02        | B73<F1=Mo17         | 1.33                     | 2                   | >gb AAF67099.1  epsilon-COP [Zea mays]                                                                                                                                                                                                                                                                                                                                                                                                                                                                                                                                                         | 287   | 7E-56   |
|                       |                 |                     |                          |                     | >ref XP_473864.1  OSJNBa0070C17.12 [Oryza sativa (japonica cultivar-group)]emb CAE05205.3  OSJNBa0070C17.12 [Oryza sativa (japonica cultivar-group)] dbj BAA94966.1  epsilon1-COP [Oryza sativa (japonica cultivar-group)]                                                                                                                                                                                                                                                                                                                                                                     | 287   | 6E-53   |
|                       |                 |                     |                          |                     | >ref NP_181030.1  protein transporter [Arabidopsis thaliana]gb AAM98315.1  At2g34840/F19I3.7 [Arabidopsis thaliana] gb AAC12824.1  putative coatomer epsilon subunit [Arabidopsis thaliana] gb AAL91638.1  At2g34840/F19I3.7 [Arabidopsis thaliana] pir T00466 coatomer complex epsilon chain homolog F19I3.7 - Arabidopsis thaliana sp O64748 COPE ARATH Probable coatomer epsilon subunit (Epsilon-coat protein) (Epsilon-COP)                                                                                                                                                               | 293   | 2E-39   |
|                       |                 |                     |                          |                     | >gb AAM65018.1  coatomer-like protein, epsilon subunit [Arabidopsis thaliana]                                                                                                                                                                                                                                                                                                                                                                                                                                                                                                                  | 289   | 2E-38   |
|                       |                 |                     |                          |                     | >ref NP_174351.1  protein transporter [Arabidopsis thaliana]gb AAK15559.1  putative coatomer protein, epsilon subunit [Arabidopsis thaliana] gb AAL34287.1  putative coatomer protein, epsilon subunit [Arabidopsis thaliana] gb AAK44140.1  putative coatomer protein, epsilon subunit [Arabidopsis thaliana] gb AAD25750.1  Strong similarity to F19I3.7 gi 3033380 putative coatomer epsilon subunit from Arabidopsis thaliana BAC gb AC004238. ESTs gb Z17908, gb AA728673, gb N96555, gb H76335, gb AA712463, gb W43247, gb T45611, gb T21160, gb T14119 and A1100483 come from this gene | 292   | 2E-38   |
|                       |                 |                     |                          |                     | >ref NP_911223.1  putative secretory carrier membrane protein [Oryza sativa (japonica cultivar-group)] ref XP_506412.1  PREDICTED OJ1112_E08.118 gene product [Oryza sativa (japonica cultivar-group)] dbj BAC15812.1  putative secretory carrier membrane protein [Oryza sativa (japonica cultivar-group)]                                                                                                                                                                                                                                                                                    | 306   | 1E-45   |
| CB604312              | 1.46E-02        | Mo17<B73=F1         | 1.19                     | 11                  | >ref NP_172584.1  carrier [Arabidopsis thaliana]                                                                                                                                                                                                                                                                                                                                                                                                                                                                                                                                               | 291   | 1E-38   |
|                       |                 |                     |                          |                     | >ref XP_463469.1  secretory carrier membrane protein [Oryza sativa (japonica cultivar-group)] dbj BAB63575.1  putative secretory carrier membrane protein [Oryza sativa (japonica cultivar-group)] gb AAF36688.1  secretory carrier membrane protein [Oryza sativa]                                                                                                                                                                                                                                                                                                                            | 286   | 1E-37   |
|                       |                 |                     |                          |                     | >ref NP_179680.1  carrier [Arabidopsis thaliana]gb AAT06461.1  At2g20840 [Arabidopsis thaliana] dbj BAD93720.1  putative secretory carrier-associated membrane protein [Arabidopsis thaliana] gb AAD20911.1  putative secretory carrier-associated membrane protein [Arabidopsis thaliana]                                                                                                                                                                                                                                                                                                     | 282   | 5E-37   |
|                       |                 |                     |                          |                     | >gb AAU90239.1  putative secretory carrier membrane protein [Oryza sativa (japonica cultivar-group)] gb AAU90243.1  putative secretory carrier membrane protein [Oryza sativa (japonica cultivar-group)]                                                                                                                                                                                                                                                                                                                                                                                       | 282   | 7E-36   |
| DV942883              | 1.46E-02        | B73<Mo17            | 3.93                     | 3                   | >ref NP_909810.1  dentin sialophosphoprotein precursor-like protein [Oryza sativa(japonica cultivar-group)] gb AAM19018.1  hypothetical protein [Oryza sativa (japonica cultivar-group)] gb AAN65039.1  dentin sialophosphoprotein precursor-like protein [Oryza sativa (japonica cultivar-group)]                                                                                                                                                                                                                                                                                             | 494   | 1E-37   |
|                       |                 |                     |                          |                     | >ref NP_001031449.1  unknown protein [Arabidopsis thaliana]ref NP_180640.2  unknown protein [Arabidopsis thaliana] gb AAU45205.1  At2g30820 [Arabidopsis thaliana] gb AAS49046.1  At2g30820 [Arabidopsis thaliana]                                                                                                                                                                                                                                                                                                                                                                             | 421   | 2E-24   |
|                       |                 |                     |                          |                     | >gb AAC20717.1  unknown protein [Arabidopsis thaliana]                                                                                                                                                                                                                                                                                                                                                                                                                                                                                                                                         | 419   | 2E-24   |
|                       |                 |                     |                          |                     | >gb AAM13918.1  unknown protein [Arabidopsis thaliana]                                                                                                                                                                                                                                                                                                                                                                                                                                                                                                                                         | 337   | 2E-19   |

**Table 4. Microarray analysis results, mode of gene action classification, and BLAST annotation for the 1,367 ESTs identified as differentially expressed among genotypes (15% FDR)**

| GenBank accession no. | Overall P value | Significant pattern | Fold change <sup>‡</sup> | Sector <sup>‡</sup> | BLAST annotation*                                                                                                                                                                                                                                                                                                                                                                                                                                                                                                                                                                                                                                                                                                      | Score | E value |
|-----------------------|-----------------|---------------------|--------------------------|---------------------|------------------------------------------------------------------------------------------------------------------------------------------------------------------------------------------------------------------------------------------------------------------------------------------------------------------------------------------------------------------------------------------------------------------------------------------------------------------------------------------------------------------------------------------------------------------------------------------------------------------------------------------------------------------------------------------------------------------------|-------|---------|
|                       |                 |                     |                          |                     | >ref NP_172151.2  unknown protein [Arabidopsis thaliana]                                                                                                                                                                                                                                                                                                                                                                                                                                                                                                                                                                                                                                                               | 481   | 2E-19   |
| CD001441              | 1.46E-02        | F1=Mo17<B73         | 1.26                     | 9                   | >ref XP_475453.1  putative 60S ribosomal protein L24 [Oryza sativa (japonica cultivar-group)]                                                                                                                                                                                                                                                                                                                                                                                                                                                                                                                                                                                                                          | 161   | 1E-47   |
|                       |                 |                     |                          |                     | (japonica cultivar-group)]                                                                                                                                                                                                                                                                                                                                                                                                                                                                                                                                                                                                                                                                                             | 162   | 7E-46   |
|                       |                 |                     |                          |                     | >dbj BAD82702.1  putative 60S ribosomal protein L24 [Oryza sativa (japonica cultivar-group)]                                                                                                                                                                                                                                                                                                                                                                                                                                                                                                                                                                                                                           | 162   | 1E-45   |
|                       |                 |                     |                          |                     | >emb CAA63960.1  L24 ribosomal protein [Hordeum vulgare subsp. vulgare]sp P50888 RL24 HORVU 60S ribosomal protein L24                                                                                                                                                                                                                                                                                                                                                                                                                                                                                                                                                                                                  | 160   | 2E-45   |
|                       |                 |                     |                          |                     | >ref NP_911528.1  putative 60S ribosomal protein L24 [Oryza sativa (japonica cultivar-group)] dbj BAD30738.1  putative 60S ribosomal protein L24 [Oryza sativa (japonica cultivar-group)] dbj BAC06922.1  putative 60S ribosomal protein L24 [Oryza sativa (japonica cultivar-group)]                                                                                                                                                                                                                                                                                                                                                                                                                                  | 186   | 6E-43   |
| DV621069              | 1.46E-02        | B73<F1<Mo17         | 1.32                     | 4                   | >gb AAG13986.1  60S ribosomal protein L24 [Prunus avium]sp Q9FUL4 RL24 PRUAV 60S ribosomal protein L24                                                                                                                                                                                                                                                                                                                                                                                                                                                                                                                                                                                                                 | 718   | 2E-16   |
|                       |                 |                     |                          |                     | >gb AAL76002.1  putative phosphatidylinositol-4-phosphate-5-kinase [Zea mays]                                                                                                                                                                                                                                                                                                                                                                                                                                                                                                                                                                                                                                          |       |         |
|                       |                 |                     |                          |                     | >gb AAM97158.1  putative phosphatidylinositol 4-phosphate 5-kinase [Oryza sativa(japonica cultivar-group)] ref XP_469458.1  putative phosphatidylinositol 4-phosphate 5-kinase [Oryza sativa (japonica cultivar-group)]                                                                                                                                                                                                                                                                                                                                                                                                                                                                                                | 731   | 4E-15   |
|                       |                 |                     |                          |                     | >gb AAF80332.1  putative phosphatidylinositol 4-phosphate 5-kinase [Nicotianarustica]                                                                                                                                                                                                                                                                                                                                                                                                                                                                                                                                                                                                                                  | 798   | 8E-12   |
|                       |                 |                     |                          |                     | >ref NP_177897.1  1-phosphatidylinositol-4-phosphate 5-kinase [Arabidopsis thaliana]gb AAG51623.1  putative phosphatidylinositol-4-phosphate-5-kinase; 27989-31218 [Arabidopsis thaliana] sp Q8L796 PI5K2_ARATH Phosphatidylinositol-4-phosphate 5-kinase 2 (AtPIP5K2) (1-phosphatidylinositol-4-phosphate kinase 2) (PtdIns(4)P-5-kinase 2) (Diphosphoinositide kinase 2)                                                                                                                                                                                                                                                                                                                                             | 754   | 1E-11   |
|                       |                 |                     |                          |                     | >gb AAM97057.1  putative phosphatidylinositol-4-phosphate-5-kinase [Arabidopsisthaliana] gb AAN72123.1  putative phosphatidylinositol-4-phosphate-5-kinase [Arabidopsis thaliana]                                                                                                                                                                                                                                                                                                                                                                                                                                                                                                                                      | 318   | 1E-11   |
| CD001640              | 1.47E-02        | B73=F1<Mo17         | 1.43                     | 4                   | ns                                                                                                                                                                                                                                                                                                                                                                                                                                                                                                                                                                                                                                                                                                                     |       |         |
| CB617273              | 1.47E-02        | B73<F1=Mo17         | 1.45                     | 2                   | ns                                                                                                                                                                                                                                                                                                                                                                                                                                                                                                                                                                                                                                                                                                                     |       |         |
| DV622032              | 1.47E-02        | B73=F1<Mo17         | 1.35                     | 4                   | >ref XP_467100.1  putative enoyl-CoA hydratase [Oryza sativa (japonica cultivar-group)] dbj BAD25316.1  putative enoyl-CoA hydratase [Oryza sativa (japonica cultivar-group)]                                                                                                                                                                                                                                                                                                                                                                                                                                                                                                                                          | 300   | 3E-70   |
|                       |                 |                     |                          |                     | >emb CAC39053.1  putative enoyl-CoA hydratase [Oryza sativa]                                                                                                                                                                                                                                                                                                                                                                                                                                                                                                                                                                                                                                                           | 295   | 3E-70   |
|                       |                 |                     |                          |                     | >ref XP_467099.1  putative enoyl-CoA hydratase [Oryza sativa (japonica cultivar-group)] dbj BAD25315.1  putative enoyl-CoA hydratase [Oryza sativa (japonica cultivar-group)]                                                                                                                                                                                                                                                                                                                                                                                                                                                                                                                                          | 269   | 2E-63   |
|                       |                 |                     |                          |                     | >gb AAM18495.1  enoyl-CoA hydratase [Arabidopsis lyrata subsp. petraea]                                                                                                                                                                                                                                                                                                                                                                                                                                                                                                                                                                                                                                                | 229   | 2E-58   |
|                       |                 |                     |                          |                     | >emb CAB88078.1  hypothetical protein [Arabidopsis thaliana]                                                                                                                                                                                                                                                                                                                                                                                                                                                                                                                                                                                                                                                           | 217   | 3E-57   |
| BM336587              | 1.48E-02        | Mo17<B73=F1         | 1.24                     | 10                  | >ref XP_475090.1  unknown protein [Oryza sativa (japonica cultivar-group)]                                                                                                                                                                                                                                                                                                                                                                                                                                                                                                                                                                                                                                             | 128   | 3E-40   |
|                       |                 |                     |                          |                     | >ref NP_567643.1  unknown protein [Arabidopsis thaliana]emb CAB79155.1  hypothetical protein [Arabidopsis thaliana] emb CAA18103.1  hypothetical protein [Arabidopsis thaliana] gb AAL32600.1  Unknown protein [Arabidopsis thaliana] gb AAP21339.1  At4g22000 [Arabidopsis thaliana] gb AAM63302.1  unknown [Arabidopsis thaliana]                                                                                                                                                                                                                                                                                                                                                                                    | 130   | 1E-31   |
|                       |                 |                     |                          |                     | >ref XP_468478.1  putative Vacuolar ATP synthase subunit F [Oryza sativa (japonica cultivar-group)] dbj BAD22867.1  putative Vacuolar ATP synthase subunit F [Oryza sativa (japonica cultivar-group)]                                                                                                                                                                                                                                                                                                                                                                                                                                                                                                                  | 130   | 2E-63   |
|                       |                 |                     |                          |                     | >ref NP_192171.1  hydrogen-transporting ATP synthase, rotational mechanism /hydrogen-transporting ATPase, rotational mechanism [Arabidopsis thaliana] gb AAC78269.1  putative vacuolar ATPase [Arabidopsis thaliana] emb CAB80755.1  putative vacuolar ATPase [Arabidopsis thaliana] gb AAM51311.1  putative vacuolar ATPase [Arabidopsis thaliana] gb AAL38753.1  putative vacuolar ATPase [Arabidopsis thaliana] gb AAM60868.1  putative vacuolar ATPase [Arabidopsis thaliana] pir T01087 H+-exporting ATPase (EC 3.6.3.6) 14K chain, vacuolar - Arabidopsis thaliana sp Q9ZQX4 VATF_ARATH Probable vacuolar ATP synthase subunit F (V-ATPase F subunit) (Vacuolar proton pump F subunit) (V-ATPase 14 kDa subunit) | 128   | 1E-57   |
|                       |                 |                     |                          |                     | >gb ABC60334.1  putative vacuolar ATP synthase subunit F [Musa acuminata]                                                                                                                                                                                                                                                                                                                                                                                                                                                                                                                                                                                                                                              | 117   | 3E-52   |
|                       |                 |                     |                          |                     | >emb CAE57827.1  Hypothetical protein CBG00852 [Caenorhabditis briggsae]                                                                                                                                                                                                                                                                                                                                                                                                                                                                                                                                                                                                                                               | 121   | 5E-32   |
|                       |                 |                     |                          |                     | >ref XP_645434.1  hypothetical protein DDB0216933 [Dictyostelium discoideum]gb EAL71520.1  hypothetical protein DDB0216933 [Dictyostelium discoideum]                                                                                                                                                                                                                                                                                                                                                                                                                                                                                                                                                                  | 120   | 2E-31   |
| DV489785              | 1.49E-02        | F1<B73=Mo17         | 1.78                     | 7                   | >gb AAO72316.1  multidrug resistance associated protein 1 [Zea mays]gb AAO72315.1  multidrug resistance associated protein 1 [Zea mays]                                                                                                                                                                                                                                                                                                                                                                                                                                                                                                                                                                                | 1477  | 6E-19   |
|                       |                 |                     |                          |                     | >emb CAD59603.1  MRP-like ABC transporter [Oryza sativa (japonica cultivar-group)]                                                                                                                                                                                                                                                                                                                                                                                                                                                                                                                                                                                                                                     | 1202  | 4E-17   |
|                       |                 |                     |                          |                     | >gb AAV59449.1  putative MRP-like ABC transporter [Oryza sativa (japonica cultivar-group)] ref XP_476085.1  putative MRP-like ABC transporter [Oryza sativa (japonica cultivar-group)]                                                                                                                                                                                                                                                                                                                                                                                                                                                                                                                                 | 1474  | 4E-10   |
|                       |                 |                     |                          |                     | >gb AAO49474.1  multidrug resistance-associated protein-like protein [Vitisvinifera]                                                                                                                                                                                                                                                                                                                                                                                                                                                                                                                                                                                                                                   | 189   | 3E-8    |
|                       |                 |                     |                          |                     | >emb CAD44995.1  multidrug-resistance related protein [Arabidopsis thaliana]                                                                                                                                                                                                                                                                                                                                                                                                                                                                                                                                                                                                                                           | 1294  | 6E-7    |
| CD651442              | 1.49E-02        | B73<F1=Mo17         | 1.24                     | 3                   | ns                                                                                                                                                                                                                                                                                                                                                                                                                                                                                                                                                                                                                                                                                                                     |       |         |
| DV492815              | 1.50E-02        | B73<F1=Mo17         | 1.42                     | 3                   | >ref XP_475398.1  putative calcium-dependent protein kinase [Oryza sativa (japonica cultivar-group)] gb AAT58789.1  putative calcium-dependent protein kinase [Oryza sativa (japonica cultivar-group)] gb AAT58767.1  putative calcium-dependent protein kinase [Oryza sativa (japonica cultivar-group)]                                                                                                                                                                                                                                                                                                                                                                                                               | 547   | 1E-38   |
|                       |                 |                     |                          |                     | >ref NP_915342.1  putative calcium-dependent protein kinase [Oryza sativa (japonica cultivar-group)] dbj BAB92912.1  putative calcium dependent protein kinase [Oryza sativa (japonica cultivar-group)]                                                                                                                                                                                                                                                                                                                                                                                                                                                                                                                | 551   | 2E-37   |
|                       |                 |                     |                          |                     | >dbj BAD93899.1  calcium-dependent like protein kinase [Arabidopsis thaliana]                                                                                                                                                                                                                                                                                                                                                                                                                                                                                                                                                                                                                                          | 111   | 2E-34   |
|                       |                 |                     |                          |                     | >gb AAL32617.1  calcium-dependent protein kinase [Arabidopsis thaliana]gb AAO29985.1  calcium-dependent protein kinase [Arabidopsis thaliana]                                                                                                                                                                                                                                                                                                                                                                                                                                                                                                                                                                          | 528   | 2E-34   |

**Table 4. Microarray analysis results, mode of gene action classification, and BLAST annotation for the 1,367 ESTs identified as differentially expressed among genotypes (15% FDR)**

| GenBank accession no.                                                                                                                                                                                                                                                  | Overall P value | Significant pattern | Fold change <sup>†</sup> | Sector <sup>‡</sup> | BLAST annotation*                                                                                                                                                                                                                                                                                                                                                                                                                                    | Score | E value |
|------------------------------------------------------------------------------------------------------------------------------------------------------------------------------------------------------------------------------------------------------------------------|-----------------|---------------------|--------------------------|---------------------|------------------------------------------------------------------------------------------------------------------------------------------------------------------------------------------------------------------------------------------------------------------------------------------------------------------------------------------------------------------------------------------------------------------------------------------------------|-------|---------|
|                                                                                                                                                                                                                                                                        |                 |                     |                          |                     | >gb AAA99795.1  calcium-dependent protein kinase                                                                                                                                                                                                                                                                                                                                                                                                     | 196   | 2E-34   |
| CB331612                                                                                                                                                                                                                                                               | 1.50E-02        | Mo17<B73            | 1.25                     | 9                   | >ref XP_476919.1  putative ES43 protein [Oryza sativa (japonica cultivar-group)]dbj BAD30193.1  putative ES43 protein [Oryza sativa (japonica cultivar-group)]                                                                                                                                                                                                                                                                                       | 218   | 1E-19   |
|                                                                                                                                                                                                                                                                        |                 |                     |                          |                     | dbj BAC79935.1  putative ES43 protein [Oryza sativa (japonica cultivar-group)]                                                                                                                                                                                                                                                                                                                                                                       |       |         |
|                                                                                                                                                                                                                                                                        |                 |                     |                          |                     | >ref NP_909931.1  putative DNA-binding protein [Oryza sativa (japonica cultivar-group)] gb AAO37525.1  putative DNA-binding protein [Oryza sativa (japonica cultivar-group)]                                                                                                                                                                                                                                                                         | 218   | 2E-11   |
|                                                                                                                                                                                                                                                                        |                 |                     |                          |                     | >emb CAA54682.1  ES43 [Hordeum vulgare]                                                                                                                                                                                                                                                                                                                                                                                                              | 227   | 4E-11   |
| DV492134                                                                                                                                                                                                                                                               | 1.50E-02        | B73<F1=Mo17         | 1.38                     | 3                   | >ref XP_450843.1  putative zinc-finger motif [Oryza sativa (japonica cultivar-group)]ref XP_506665.1  PREDICTED OSJNBa0048A13.16 gene product [Oryza sativa (japonica cultivar-group)] dbj BAD26108.1  putative zinc-finger motif [Oryza sativa (japonica cultivar-group)]                                                                                                                                                                           | 216   | 1E-6    |
|                                                                                                                                                                                                                                                                        |                 |                     |                          |                     | >emb CAA55022.1  beta tubulin [Oryza sativa (japonica cultivar-group)]                                                                                                                                                                                                                                                                                                                                                                               | 447   | 1E-72   |
|                                                                                                                                                                                                                                                                        |                 |                     |                          |                     | >emb CAE52516.1  beta tubulin [Setaria viridis]                                                                                                                                                                                                                                                                                                                                                                                                      | 448   | 1E-72   |
|                                                                                                                                                                                                                                                                        |                 |                     |                          |                     | >ref NP_915874.1  tubulin beta chain [Oryza sativa (japonica cultivar-group)]dbj BAB92274.1  beta-tubulin [Oryza sativa (japonica cultivar-group)]                                                                                                                                                                                                                                                                                                   |       |         |
|                                                                                                                                                                                                                                                                        |                 |                     |                          |                     | dbj BAA06381.1  beta-tubulin [Oryza sativa (japonica cultivar-group)] sp P45960 TBB4 ORYSA Tubulin beta-4 chain (Beta-4 tubulin)                                                                                                                                                                                                                                                                                                                     | 447   | 1E-72   |
|                                                                                                                                                                                                                                                                        |                 |                     |                          |                     | >gb AAA66495.1  beta-tubulin                                                                                                                                                                                                                                                                                                                                                                                                                         | 447   | 1E-72   |
|                                                                                                                                                                                                                                                                        |                 |                     |                          |                     | >sp Q41783 TBB6 MAIZE Tubulin beta-6 chain (Beta-6 tubulin)gb AAA20186.1  beta-6 tubulin                                                                                                                                                                                                                                                                                                                                                             | 446   | 1E-72   |
| CB331485                                                                                                                                                                                                                                                               | 1.51E-02        | Mo17<B73=F1         | 1.36                     | 11                  | ns                                                                                                                                                                                                                                                                                                                                                                                                                                                   |       |         |
| CB381032                                                                                                                                                                                                                                                               | 1.51E-02        | Mo17<B73=F1         | 1.18                     | 10                  | >dbj BAD45217.1  root hair defective 3 GTP-binding protein-like [Oryza sativa(japonica cultivar-group)]                                                                                                                                                                                                                                                                                                                                              | 524   | 3E-42   |
|                                                                                                                                                                                                                                                                        |                 |                     |                          |                     | >ref NP_918504.1  putative root hair defective 3 (RHD3) [Oryza sativa (japonica cultivar-group)]                                                                                                                                                                                                                                                                                                                                                     | 806   | 3E-42   |
|                                                                                                                                                                                                                                                                        |                 |                     |                          |                     | >gb AAS67855.2  root hair defective 3 GTP-binding protein [Triticum aestivum]                                                                                                                                                                                                                                                                                                                                                                        | 804   | 1E-39   |
|                                                                                                                                                                                                                                                                        |                 |                     |                          |                     | >ref NP_177439.1  nucleotide binding [Arabidopsis thaliana]                                                                                                                                                                                                                                                                                                                                                                                          | 748   | 6E-31   |
|                                                                                                                                                                                                                                                                        |                 |                     |                          |                     | >ref NP_188003.1  RHD3 (ROOT HAIR DEFECTIVE 3) [Arabidopsis thaliana]gb AAM91201.1  unknown protein [Arabidopsis thaliana] gb AAM12987.1  unknown protein [Arabidopsis thaliana] gb AAB58375.1  root hair defective 3 [Arabidopsis thaliana]                                                                                                                                                                                                         | 802   | 2E-29   |
|                                                                                                                                                                                                                                                                        |                 |                     |                          |                     | >ref NP_921134.1  putative hydrolase [Oryza sativa (japonica cultivar-group)]gb AAM08665.1  Putative hydrolase [Oryza sativa (japonica cultivar-group)]                                                                                                                                                                                                                                                                                              |       |         |
| CB334560                                                                                                                                                                                                                                                               | 1.52E-02        | Mo17<B73=F1         | 1.21                     | 11                  | gb AAM08532.1  Putative hydrolase [Oryza sativa] gb AAP53421.1  hydrolase, alpha/beta fold family, putative [Oryza sativa (japonica cultivar-group)]                                                                                                                                                                                                                                                                                                 | 401   | 2E-75   |
|                                                                                                                                                                                                                                                                        |                 |                     |                          |                     | >ref XP_470785.1  putative hydrolase [Oryza sativa (japonica cultivar-group)]gb AAR06364.1  putative hydrolase [Oryza sativa (japonica cultivar-group)]                                                                                                                                                                                                                                                                                              | 333   | 7E-44   |
|                                                                                                                                                                                                                                                                        |                 |                     |                          |                     | >ref XP_479188.1  hydrolase-like protein [Oryza sativa (japonica cultivar-group)]dbj BAC79905.1  hydrolase-like protein [Oryza sativa (japonica cultivar-group)]                                                                                                                                                                                                                                                                                     | 327   | 5E-41   |
|                                                                                                                                                                                                                                                                        |                 |                     |                          |                     | >gb AAV78820.1  hydrolase [Arabidopsis thaliana]                                                                                                                                                                                                                                                                                                                                                                                                     | 311   | 3E-36   |
|                                                                                                                                                                                                                                                                        |                 |                     |                          |                     | >gb AAM61205.1  putative hydrolase [Arabidopsis thaliana]                                                                                                                                                                                                                                                                                                                                                                                            | 328   | 6E-33   |
| DV621917                                                                                                                                                                                                                                                               | 1.53E-02        | B73<F1<Mo17         | 1.42                     | 4                   | ns                                                                                                                                                                                                                                                                                                                                                                                                                                                   |       |         |
| BM080350                                                                                                                                                                                                                                                               | 1.54E-02        | F1=Mo17<B73         | 1.38                     | 9                   | >ref XP_468412.1  putative 3-ketoacyl-CoA thiolase; acetyl-CoA acyltransferase [Oryza sativa (japonica cultivar-group)] ref XP_507050.1  PREDICTED OJ1136_C12.17 gene product [Oryza sativa (japonica cultivar-group)] gb AAO72588.1  3-ketoacyl-CoA thiolase-like protein [Oryza sativa (japonica cultivar-group)] dbj BAD21525.1  putative 3-ketoacyl-CoA thiolase; acetyl-CoA acyltransferase [Oryza sativa (japonica cultivar-group)]            | 448   | 3E-42   |
|                                                                                                                                                                                                                                                                        |                 |                     |                          |                     | >ref NP_921813.1  putative thiolase [Oryza sativa (japonica cultivar-group)]gb AAK54299.1  putative thiolase [Oryza sativa (japonica cultivar-group)]                                                                                                                                                                                                                                                                                                |       |         |
|                                                                                                                                                                                                                                                                        |                 |                     |                          |                     | gb AAP54100.1  thiolase, putative [Oryza sativa (japonica cultivar-group)]                                                                                                                                                                                                                                                                                                                                                                           | 461   | 3E-41   |
|                                                                                                                                                                                                                                                                        |                 |                     |                          |                     | >emb CAA63598.1  glyoxysomal beta-ketoacyl-thiolase [Brassica napus]                                                                                                                                                                                                                                                                                                                                                                                 | 462   | 5E-41   |
|                                                                                                                                                                                                                                                                        |                 |                     |                          |                     | >gb ABB45810.1  acetoacetyl-CoA thiolase [Salvia miltiorrhiza]                                                                                                                                                                                                                                                                                                                                                                                       | 172   | 7E-41   |
|                                                                                                                                                                                                                                                                        |                 |                     |                          |                     | >ref NP_180873.1  PED1 (PEROXISOME DEFECTIVE 1) [Arabidopsis thaliana]gb AAK15577.1  putative 3-ketoacyl-CoA thiolase [Arabidopsis thaliana]                                                                                                                                                                                                                                                                                                         |       |         |
|                                                                                                                                                                                                                                                                        |                 |                     |                          |                     | gb AAG42910.1  putative 3-ketoacyl-CoA thiolase [Arabidopsis thaliana] gb AAC04908.1  3-ketoacyl-CoA thiolase [Arabidopsis thaliana] dbj BAA25248.1  3-ketoacyl-CoA thiolase [Arabidopsis thaliana] gb AAL36070.1  At2g33150/F25118.11 [Arabidopsis thaliana] gb AAK96606.1  At2g33150/F25118.11 [Arabidopsis thaliana] gb AAM65085.1  3-ketoacyl-CoA thiolase [Arabidopsis thaliana] dbj BAA25249.1  3-ketoacyl-CoA thiolase [Arabidopsis thaliana] |       |         |
|                                                                                                                                                                                                                                                                        |                 |                     |                          |                     | sp Q56WD9 THIK2_ARATH 3-ketoacyl-CoA thiolase 2, peroxisomal precursor (Beta-ketothiolase 2) (Acetyl-CoA acyltransferase 2) (Peroxisomal 3-oxoacyl-CoA thiolase 2) (Peroxisome defective protein 1)                                                                                                                                                                                                                                                  | 462   | 2E-40   |
|                                                                                                                                                                                                                                                                        |                 |                     |                          |                     | >sp P93554 NDK1_SACOF Nucleoside diphosphate kinase 1 (Nucleoside diphosphate kinase I)(NDK I) (NDP kinase I) (NDPK I) (PP18) gb AAB40609.1  nucleoside diphosphate kinase                                                                                                                                                                                                                                                                           |       |         |
|                                                                                                                                                                                                                                                                        |                 |                     |                          |                     | >dbj BAA12982.1  PNDKN1 [Pisum sativum]                                                                                                                                                                                                                                                                                                                                                                                                              | 149   | 8E-68   |
| >emb CAA50511.1  nucleoside-diphosphate kinase [Pisum sativum]sp P47922 NDK1_PEA Nucleoside diphosphate kinase 1 (Nucleoside diphosphate kinase I) (NDK I) (NDP kinase I) (NDPK I)                                                                                     | 149             | 3E-62               |                          |                     |                                                                                                                                                                                                                                                                                                                                                                                                                                                      |       |         |
| >ref NP_922751.1  putative nucleoside diphosphate kinase [Oryza sativa (japonica cultivar-group)] gb AAG60181.1  putative nucleoside diphosphate kinase [Oryza sativa] gb AAP55038.1  nucleoside diphosphate kinase, putative [Oryza sativa (japonica cultivar-group)] | 149             | 7E-62               |                          |                     |                                                                                                                                                                                                                                                                                                                                                                                                                                                      |       |         |
| >gb AAA93030.1  nucleoside diphosphate kinase [Glycine max]sp Q39839 NDK1_SOYBN Nucleoside diphosphate kinase 1 (Nucleoside diphosphate kinase I) (NDK I) (NDP kinase I) (NDPK I)                                                                                      | 151             | 2E-61               |                          |                     |                                                                                                                                                                                                                                                                                                                                                                                                                                                      |       |         |
| DV493491                                                                                                                                                                                                                                                               | 1.55E-02        | Mo17<B73=F1         | 1.98                     | 11                  | >ref XP_473399.1  OSJNBa0079A21.10 [Oryza sativa (japonica cultivar-group)]emb CAD41468.3  OSJNBa0079A21.12 [Oryza sativa (japonica cultivar-group)]                                                                                                                                                                                                                                                                                                 | 695   | 3E-62   |
|                                                                                                                                                                                                                                                                        |                 |                     |                          |                     | >ref XP_467102.1  putative protein kinase 5 [Oryza sativa (japonica cultivar-group)]dbj BAD25318.1  putative protein kinase 5 [Oryza sativa (japonica cultivar-group)]                                                                                                                                                                                                                                                                               | 689   | 2E-56   |

**Table 4. Microarray analysis results, mode of gene action classification, and BLAST annotation for the 1,367 ESTs identified as differentially expressed among genotypes (15% FDR)**

| GenBank accession no. | Overall P value | Significant pattern | Fold change <sup>†</sup> | Sector <sup>‡</sup> | BLAST annotation*                                                                                                                                                                                                                                                                                                                                                                                     | Score | E value |
|-----------------------|-----------------|---------------------|--------------------------|---------------------|-------------------------------------------------------------------------------------------------------------------------------------------------------------------------------------------------------------------------------------------------------------------------------------------------------------------------------------------------------------------------------------------------------|-------|---------|
|                       |                 |                     |                          |                     | >emb CAC39054.1  putative protein kinase [Oryza sativa]                                                                                                                                                                                                                                                                                                                                               | 609   | 2E-56   |
|                       |                 |                     |                          |                     | >gb AAW38935.1  AvrPto-dependent Pto-interacting protein 3 [Lycopersicon esculentum]                                                                                                                                                                                                                                                                                                                  | 700   | 3E-56   |
|                       |                 |                     |                          |                     | >ref NP_850426.1  kinase [Arabidopsis thaliana]                                                                                                                                                                                                                                                                                                                                                       | 765   | 9E-50   |
| CD568962              | 1.56E-02        | Mo17<B73=F1         | 1.33                     | 10                  | >ref XP_472410.1  OJ000126_13.9 [Oryza sativa (japonica cultivar-group)] emb CAE02065.2  OJ000126_13.9 [Oryza sativa (japonica cultivar-group)]<br>>dbj BAD29299.1  40S ribosomal protein S14 [Oryza sativa (japonica cultivar-group)] dbj BAD27798.1  40S ribosomal protein S14 [Oryza sativa (japonica cultivar-group)]                                                                             | 151   | 2E-63   |
|                       |                 |                     |                          |                     | >sp P19951 RS142 MAIZE 40S ribosomal protein S14 (Clone MCH2)                                                                                                                                                                                                                                                                                                                                         | 150   | 1E-62   |
|                       |                 |                     |                          |                     | >ref XP_464199.1  putative ribosomal protein S14 [Oryza sativa (japonica cultivar-group)] ref XP_506724.1  PREDICTED OJ9003_G05.34 gene product [Oryza sativa (japonica cultivar-group)] dbj BAD25218.1  putative ribosomal protein S14 [Oryza sativa (japonica cultivar-group)]                                                                                                                      | 150   | 5E-61   |
|                       |                 |                     |                          |                     | >gb AAO41731.1  cytoplasmic ribosomal protein S14 [Brassica napus]                                                                                                                                                                                                                                                                                                                                    | 150   | 2E-59   |
|                       |                 |                     |                          |                     | >sp P19950 RS141 MAIZE 40S ribosomal protein S14 (Clone MCH1)                                                                                                                                                                                                                                                                                                                                         | 149   | 1E-58   |
| CB329354              | 1.56E-02        | B73<F1=Mo17         | 1.31                     | 2                   | ns                                                                                                                                                                                                                                                                                                                                                                                                    |       |         |
| DV493046              | 1.56E-02        | B73<F1=Mo17         | 1.38                     | 3                   | >gb ABA98935.1  PAPA-1-like conserved region, putative [Oryza sativa (japonica cultivar-group)]                                                                                                                                                                                                                                                                                                       | 552   | 4E-28   |
|                       |                 |                     |                          |                     | >ref XP_470049.1  unknown protein [Oryza sativa (japonica cultivar-group)] gb AAF73843.1  unknown protein [Oryza sativa (japonica cultivar-group)]                                                                                                                                                                                                                                                    | 523   | 1E-26   |
|                       |                 |                     |                          |                     | >ref NP_176041.2  protein binding [Arabidopsis thaliana] dbj BAC42342.1  unknown protein [Arabidopsis thaliana]                                                                                                                                                                                                                                                                                       | 502   | 2E-25   |
|                       |                 |                     |                          |                     | >ref NP_182257.1  protein binding [Arabidopsis thaliana] gb AAB63835.1  unknown protein [Arabidopsis thaliana]                                                                                                                                                                                                                                                                                        | 486   | 3E-21   |
|                       |                 |                     |                          |                     | >gb AAF63832.1  hypothetical protein [Arabidopsis thaliana]                                                                                                                                                                                                                                                                                                                                           | 432   | 2E-17   |
| DV494969              | 1.56E-02        | B73=F1<Mo17         | 1.27                     | 4                   | >gb ABA98280.1  ubiquitin-specific protease 12 [Oryza sativa (japonica cultivar-group)]                                                                                                                                                                                                                                                                                                               | 1093  | e-124   |
|                       |                 |                     |                          |                     | >gb AAF23207.1  putative ubiquitin carboxyl-terminal hydrolase [Arabidopsis thaliana]                                                                                                                                                                                                                                                                                                                 | 1124  | e-116   |
|                       |                 |                     |                          |                     | >ref NP_850783.1  UBP12 (UBIQUITIN-SPECIFIC PROTEASE 12); cysteine-type endopeptidase/double-stranded DNA binding / ubiquitin thiolesterase/ ubiquitin-specific protease [Arabidopsis thaliana] gb AAN13185.1  putative ubiquitin-specific protease UBP12 [Arabidopsis thaliana] gb AAK25908.1  putative ubiquitin-specific protease UBP12 [Arabidopsis thaliana]                                     | 1115  | e-116   |
|                       |                 |                     |                          |                     | >gb AAG42754.1  ubiquitin-specific protease 12 [Arabidopsis thaliana]                                                                                                                                                                                                                                                                                                                                 | 1116  | e-116   |
|                       |                 |                     |                          |                     | >ref NP_187797.3  cysteine-type endopeptidase/ double-stranded DNA binding / ubiquitin thiolesterase/ ubiquitin-specific protease [Arabidopsis thaliana]                                                                                                                                                                                                                                              |       |         |
|                       |                 |                     |                          |                     | gb AAO22588.1  putative ubiquitin carboxyl-terminal hydrolase [Arabidopsis thaliana]                                                                                                                                                                                                                                                                                                                  | 1115  | e-116   |
| CB605136              | 1.57E-02        | B73<F1              | 1.4                      | 1                   | ns                                                                                                                                                                                                                                                                                                                                                                                                    |       |         |
| DV622625              | 1.57E-02        | B73<Mo17            | 1.33                     | 4                   | >ref NP_908448.1  putative receptor serine/threonine kinase [Oryza sativa (japonica cultivar-group)]                                                                                                                                                                                                                                                                                                  | 674   | 3E-24   |
|                       |                 |                     |                          |                     | >ref XP_549893.1  putative receptor serine/threonine kinase PR5K [Oryza sativa (japonica cultivar-group)] dbj BAD45146.1  putative receptor serine/threonine kinase PR5K [Oryza sativa (japonica cultivar-group)] dbj BAD45068.1  putative receptor serine/threonine kinase PR5K [Oryza sativa (japonica cultivar-group)]                                                                             | 601   | 1E-23   |
|                       |                 |                     |                          |                     | >ref XP_471708.1  OSJNBa0079M09.1 [Oryza sativa (japonica cultivar-group)] emb CAE05332.2  OSJNBa0079M09.1 [Oryza sativa (japonica cultivar-group)]                                                                                                                                                                                                                                                   | 822   | 1E-20   |
|                       |                 |                     |                          |                     | >ref NP_908445.1  putative receptor serine/threonine kinase [Oryza sativa (japonica cultivar-group)]                                                                                                                                                                                                                                                                                                  | 649   | 1E-20   |
|                       |                 |                     |                          |                     | >ref XP_549890.1  putative receptor serine/threonine kinase PR5K [Oryza sativa (japonica cultivar-group)] dbj BAD45143.1  putative receptor serine/threonine kinase PR5K [Oryza sativa (japonica cultivar-group)] dbj BAD45065.1  putative receptor serine/threonine kinase PR5K [Oryza sativa (japonica cultivar-group)]                                                                             | 652   | 1E-20   |
| CB603803              | 1.57E-02        | Mo17<B73=F1         | 1.29                     | 10                  | ns                                                                                                                                                                                                                                                                                                                                                                                                    |       |         |
| CB604228              | 1.57E-02        | Mo17<B73=F1         | 1.19                     | 11                  | >ref NP_568778.1  oxidoreductase, acting on NADH or NADPH [Arabidopsis thaliana] gb AAL79599.1  AT5g52840/MXC20_6 [Arabidopsis thaliana]<br>gb AAL06910.1  AT5g52840/MXC20_6 [Arabidopsis thaliana] dbj BAB10432.1  unnamed protein product [Arabidopsis thaliana] sp Q9FLX7 NUFM_ARATH<br>Probable NADH-ubiquinone oxidoreductase 18 kDa subunit, mitochondrial precursor (Complex I-18Kd) (CI-18Kd) | 169   | 7E-51   |
|                       |                 |                     |                          |                     | >gb AAL32032.1  NADH-ubiquinone oxidoreductase [Retama raetam]                                                                                                                                                                                                                                                                                                                                        | 153   | 7E-50   |
|                       |                 |                     |                          |                     | >gb AAO52022.1  similar to NADH-ubiquinone oxidoreductase 13 KD-B subunit[Caenorhabditis elegans] [Dictyostelium discoideum]                                                                                                                                                                                                                                                                          | 117   | 8E-12   |
|                       |                 |                     |                          |                     | >ref XP_645190.1  hypothetical protein DDB0216983 [Dictyostelium discoideum] gb EAL71349.1  hypothetical protein DDB0216983 [Dictyostelium discoideum]                                                                                                                                                                                                                                                | 117   | 8E-12   |
|                       |                 |                     |                          |                     | >ref XP_504293.1  hypothetical protein [Yarrowia lipolytica] emb CAG79892.1  unnamed protein product [Yarrowia lipolytica CLIB122]                                                                                                                                                                                                                                                                    | 146   | 2E-10   |
| BM073392              | 1.57E-02        | Mo17<B73            | 1.5                      | 9                   | >gb ABA96372.1  arabinoxylan arabinofuranohydrolase isoenzyme AXAH-II [Oryza sativa (japonica cultivar-group)] gb ABA96371.1  arabinoxylan arabinofuranohydrolase isoenzyme AXAH-II [Oryza sativa (japonica cultivar-group)]                                                                                                                                                                          | 660   | 3E-52   |
|                       |                 |                     |                          |                     | >gb AAK21880.1  arabinoxylan arabinofuranohydrolase isoenzyme AXAH-II [Hordeum vulgare]                                                                                                                                                                                                                                                                                                               | 656   | 8E-48   |
|                       |                 |                     |                          |                     | >gb AAK21879.1  arabinoxylan arabinofuranohydrolase isoenzyme AXAH-I [Hordeum vulgare]                                                                                                                                                                                                                                                                                                                | 658   | 1E-45   |
|                       |                 |                     |                          |                     | >gb ABA96373.1  arabinoxylan arabinofuranohydrolase isoenzyme AXAH-I, putative [Oryza sativa (japonica cultivar-group)]                                                                                                                                                                                                                                                                               | 508   | 2E-39   |
|                       |                 |                     |                          |                     | >gb ABA96378.1  arabinoxylan arabinofuranohydrolase isoenzyme AXAH-I, putative [Oryza sativa (japonica cultivar-group)]                                                                                                                                                                                                                                                                               | 617   | 8E-39   |
| DV493742              | 1.57E-02        | F1<B73=Mo17         | 4.66                     | 7                   | >gb AAA33539.1  zein                                                                                                                                                                                                                                                                                                                                                                                  | 238   | 2E-67   |
|                       |                 |                     |                          |                     | >emb CAA24723.1  unnamed protein product [Zea mays] sp P04703 ZEA7 MAIZE Zein-alpha precursor (19 kDa) (Clone A20)                                                                                                                                                                                                                                                                                    | 240   | 2E-67   |
|                       |                 |                     |                          |                     | >gb AAR84080.1  mutant 19 kDa S15P alpha-zein [Zea mays]                                                                                                                                                                                                                                                                                                                                              | 240   | 3E-67   |
|                       |                 |                     |                          |                     | >gb AAL16987.1  19kD alpha zein B3 [Zea mays] sp P06677 ZEA9 MAIZE Zein-alpha precursor (19 kDa) (Clone 19C2) gb AAA33530.1  19 kDa zein protein                                                                                                                                                                                                                                                      | 240   | 4E-67   |
|                       |                 |                     |                          |                     | >sp P06676 ZEA8 MAIZE Zein-alpha precursor (19 kDa) (Clone 19C1) gb AAA33529.1  19 kDa zein protein                                                                                                                                                                                                                                                                                                   | 240   | 4E-67   |

**Table 4. Microarray analysis results, mode of gene action classification, and BLAST annotation for the 1,367 ESTs identified as differentially expressed among genotypes (15% FDR)**

| GenBank accession no. | Overall P value | Significant pattern | Fold change <sup>†</sup> | Sector <sup>‡</sup> | BLAST annotation*                                                                                                                                                                                                                                                                                                                                                                                                                                           | Score | E value |
|-----------------------|-----------------|---------------------|--------------------------|---------------------|-------------------------------------------------------------------------------------------------------------------------------------------------------------------------------------------------------------------------------------------------------------------------------------------------------------------------------------------------------------------------------------------------------------------------------------------------------------|-------|---------|
| DV551012              | 1.58E-02        | B73<F1=Mo17         | 2.37                     | 3                   | ns                                                                                                                                                                                                                                                                                                                                                                                                                                                          |       |         |
| DV942799              | 1.58E-02        | Mo17<B73            | 1.65                     | 9                   | >ref XP_463137.1  expressed protein [Oryza sativa (japonica cultivar-group)] gb AAR89874.1  expressed protein [Oryza sativa (japonica cultivar-group)]                                                                                                                                                                                                                                                                                                      | 608   | 3E-9    |
|                       |                 |                     |                          |                     | >gb AAU10703.1  hypothetical protein [Oryza sativa (japonica cultivar-group)]                                                                                                                                                                                                                                                                                                                                                                               | 260   | 1E-8    |
|                       |                 |                     |                          |                     | >gb AAD39599.1  10A19I.15 [Oryza sativa (japonica cultivar-group)]                                                                                                                                                                                                                                                                                                                                                                                          | 275   | 1E-8    |
|                       |                 |                     |                          |                     | >gb AAV44105.1  unknown protein [Oryza sativa (japonica cultivar-group)]                                                                                                                                                                                                                                                                                                                                                                                    | 1220  | 2E-8    |
|                       |                 |                     |                          |                     | >gb AAV43825.1  putative polyprotein [Oryza sativa (japonica cultivar-group)]                                                                                                                                                                                                                                                                                                                                                                               | 1067  | 2E-8    |
| DV492769              | 1.58E-02        | B73<F1=Mo17         | 4.39                     | 3                   | >ref XP_467184.1  putative ZR1 protein [Oryza sativa (japonica cultivar-group)] dbj BAD27877.1  putative ZR1 protein [Oryza sativa (japonica cultivar-group)]                                                                                                                                                                                                                                                                                               | 978   | 4E-17   |
|                       |                 |                     |                          |                     | dbj BAD07566.1  putative ZR1 protein [Oryza sativa (japonica cultivar-group)]                                                                                                                                                                                                                                                                                                                                                                               | 1041  | 1E-11   |
|                       |                 |                     |                          |                     | >ref XP_473660.1  OSJNBa0088A01.18 [Oryza sativa (japonica cultivar-group)] emb CAD41378.2  OSJNBa0088A01.18 [Oryza sativa (japonica cultivar-group)]                                                                                                                                                                                                                                                                                                       | 1035  | 6E-11   |
|                       |                 |                     |                          |                     | >emb CAC84086.1  ZR1 protein [Medicago sativa]                                                                                                                                                                                                                                                                                                                                                                                                              | 1091  | 2E-9    |
|                       |                 |                     |                          |                     | >dbj BAD87854.1  putative ZR1 protein [Oryza sativa (japonica cultivar-group)]                                                                                                                                                                                                                                                                                                                                                                              | 1086  | 2E-9    |
|                       |                 |                     |                          |                     | >ref NP_914656.1  P0431G06.4 [Oryza sativa (japonica cultivar-group)]                                                                                                                                                                                                                                                                                                                                                                                       |       |         |
| CD568678              | 1.58E-02        | B73<Mo17            | 1.35                     | 4                   | >sp P23225 GLTB_MAIZE Ferredoxin-dependent glutamate synthase, chloroplast precursor (Fd-GOGAT) gb AAA33463.1  ferredoxin-dependent glutamate synthase                                                                                                                                                                                                                                                                                                      | 1616  | e-107   |
|                       |                 |                     |                          |                     | >emb CAA73170.1  Fd-GOGAT protein [Oryza sativa (japonica cultivar-group)]                                                                                                                                                                                                                                                                                                                                                                                  | 1169  | e-101   |
|                       |                 |                     |                          |                     | >emb CAA73169.1  Fd-GOGAT protein [Oryza sativa (japonica cultivar-group)]                                                                                                                                                                                                                                                                                                                                                                                  | 746   | e-101   |
|                       |                 |                     |                          |                     | >dbj BAD31105.1  putative ferredoxin-dependent glutamate synthase, chloroplastprecursor [Oryza sativa (japonica cultivar-group)] dbj BAD30339.1  putative ferredoxin-dependent glutamate synthase, chloroplast precursor [Oryza sativa (japonica cultivar-group)]                                                                                                                                                                                           | 1612  | e-101   |
|                       |                 |                     |                          |                     | >ref XP_479407.1  putative ferredoxin-dependent glutamate synthase, chloroplastprecursor [Oryza sativa (japonica cultivar-group)]                                                                                                                                                                                                                                                                                                                           | 1640  | 3E-99   |
| CD568393              | 1.59E-02        | Mo17<B73=FI         | 1.23                     | 11                  | >emb CAB90214.1  putative elongation factor 1 beta [Hordeum vulgare subsp. vulgare]                                                                                                                                                                                                                                                                                                                                                                         | 226   | 3E-40   |
|                       |                 |                     |                          |                     | >gb AAR15081.1  translational elongation factor 1 subunit Bbeta [Pisum sativum]                                                                                                                                                                                                                                                                                                                                                                             | 231   | 2E-39   |
|                       |                 |                     |                          |                     | >ref XP_479153.1  elongation factor 1 beta [Oryza sativa (japonica cultivar-group)] ref XP_506463.1  PREDICTED P0616D06.117 gene product [Oryza sativa (japonica cultivar-group)] dbj BAC16499.1  elongation factor 1 beta [Oryza sativa (japonica cultivar-group)] dbj BAA04903.1  elongation factor 1 beta [Oryza sativa (japonica cultivar-group)] sp Q40680 EF1D ORYSA Elongation factor 1-delta (EF-1-delta) (Elongation factor 1B-beta) (eEF-1B beta) | 229   | 8E-39   |
|                       |                 |                     |                          |                     | >gb AAU89237.1  elongation factor 1 beta 2 [Oryza sativa (japonica cultivar-group)] dbj BAA34599.1  elongation factor 1 beta 2 [Oryza sativa (japonica cultivar-group)] dbj BAA34598.1  elongation factor 1 beta 2 [Oryza sativa (japonica cultivar-group)]                                                                                                                                                                                                 | 226   | 8E-39   |
|                       |                 |                     |                          |                     | >gb ABA81875.1  putative elongation factor 1B alpha-subunit0like [Solanum tuberosum] gb ABA40427.1  unknown [Solanum tuberosum]                                                                                                                                                                                                                                                                                                                             | 227   | 2E-38   |
| BM074169              | 1.59E-02        | Mo17<B73            | 1.41                     | 9                   | >ref NP_974857.1  unknown protein [Arabidopsis thaliana]                                                                                                                                                                                                                                                                                                                                                                                                    | 96    | 4E-18   |
|                       |                 |                     |                          |                     | >gb AAU44468.1  hypothetical protein AT3G01015 [Arabidopsis thaliana] gb AAY78731.1  hypothetical protein At3g01015 [Arabidopsis thaliana]                                                                                                                                                                                                                                                                                                                  | 488   | 2E-16   |
|                       |                 |                     |                          |                     | >ref NP_186749.1  unknown protein [Arabidopsis thaliana] gb AAG51320.1  hypothetical protein; 557-2776 [Arabidopsis thaliana]                                                                                                                                                                                                                                                                                                                               | 488   | 2E-16   |
|                       |                 |                     |                          |                     | >ref NP_197055.2  unknown protein [Arabidopsis thaliana]                                                                                                                                                                                                                                                                                                                                                                                                    | 497   | 7E-16   |
|                       |                 |                     |                          |                     | >emb CAC01750.1  putative protein [Arabidopsis thaliana]                                                                                                                                                                                                                                                                                                                                                                                                    | 494   | 5E-14   |
| BM072978              | 1.60E-02        | Mo17<B73            | 1.28                     | 9                   | ns                                                                                                                                                                                                                                                                                                                                                                                                                                                          |       |         |
| CB885484              | 1.60E-02        | B73=FI<Mo17         | 1.44                     | 4                   | ns                                                                                                                                                                                                                                                                                                                                                                                                                                                          |       |         |
| CD651002              | 1.60E-02        | Mo17<B73=FI         | 1.24                     | 10                  | ns                                                                                                                                                                                                                                                                                                                                                                                                                                                          |       |         |
| CD527934              | 1.61E-02        | B73<F1=Mo17         | 1.21                     | 3                   | >dbj BAD35357.1  putative yip1 interacting factor [Oryza sativa (japonica cultivar-group)] dbj BAD35445.1  putative yip1 interacting factor [Oryza sativa (japonica cultivar-group)]                                                                                                                                                                                                                                                                        | 264   | 2E-72   |
|                       |                 |                     |                          |                     | >ref NP_564367.1  unknown protein [Arabidopsis thaliana] gb AAM44952.1  unknown protein [Arabidopsis thaliana] gb AAK64057.1  unknown protein [Arabidopsis thaliana] gb AAM63447.1  unknown [Arabidopsis thaliana]                                                                                                                                                                                                                                          | 269   | 4E-56   |
|                       |                 |                     |                          |                     | >ref XP_474581.1  OSJNBa0019G23.6 [Oryza sativa (japonica cultivar-group)] emb CAE02114.2  OSJNBa0019G23.6 [Oryza sativa (japonica cultivar-group)]                                                                                                                                                                                                                                                                                                         | 280   | 1E-55   |
|                       |                 |                     |                          |                     | >ref NP_191509.2  unknown protein [Arabidopsis thaliana]                                                                                                                                                                                                                                                                                                                                                                                                    | 269   | 2E-55   |
|                       |                 |                     |                          |                     | >emb CAB75447.1  putative protein [Arabidopsis thaliana]                                                                                                                                                                                                                                                                                                                                                                                                    | 259   | 3E-55   |
| CA829297              | 1.61E-02        | FI=Mo17<B73         | 1.62                     | 8                   | ns                                                                                                                                                                                                                                                                                                                                                                                                                                                          |       |         |
| DV494025              | 1.61E-02        | B73<F1=Mo17         | 1.26                     | 2                   | >ref XP_467656.1  putative caleosin [Oryza sativa (japonica cultivar-group)] dbj BAD16161.1  putative caleosin [Oryza sativa (japonica cultivar-group)]                                                                                                                                                                                                                                                                                                     | 217   | 2E-38   |
|                       |                 |                     |                          |                     | >ref XP_467658.1  putative calcium binding protein [Oryza sativa (japonica cultivar-group)] dbj BAD15887.1  putative calcium binding protein [Oryza sativa (japonica cultivar-group)] dbj BAD16163.1  putative calcium binding protein [Oryza sativa (japonica cultivar-group)]                                                                                                                                                                             | 373   | 8E-36   |
|                       |                 |                     |                          |                     | >dbj BAD46173.1  putative calcium binding protein [Oryza sativa (japonica cultivar-group)] dbj BAD45232.1  putative calcium binding protein [Oryza sativa (japonica cultivar-group)]                                                                                                                                                                                                                                                                        | 215   | 6E-33   |
|                       |                 |                     |                          |                     | >gb AAS48644.1  putative ABA-induced protein [Cynodon dactylon]                                                                                                                                                                                                                                                                                                                                                                                             | 208   | 2E-32   |
|                       |                 |                     |                          |                     | >gb AAZ23153.1  putative calcium binding protein [Phaseolus vulgaris]                                                                                                                                                                                                                                                                                                                                                                                       | 107   | 2E-30   |
| DV622337              | 1.61E-02        | FI=Mo17<B73         | 1.25                     | 9                   | >emb CAD59410.1  SMC2 protein [Oryza sativa]                                                                                                                                                                                                                                                                                                                                                                                                                | 1175  | 7E-50   |
|                       |                 |                     |                          |                     | >dbj BAD82795.1  SMC2 protein [Oryza sativa (japonica cultivar-group)]                                                                                                                                                                                                                                                                                                                                                                                      | 1175  | 7E-50   |

**Table 4. Microarray analysis results, mode of gene action classification, and BLAST annotation for the 1,367 ESTs identified as differentially expressed among genotypes (15% FDR)**

| GenBank accession no. | Overall P value | Significant pattern | Fold change <sup>†</sup> | Sector <sup>‡</sup> | BLAST annotation*                                                                                                                                                                                                                                                                                                                                                                                                                                                                                                                                                                                                                                                            | Score | E value |
|-----------------------|-----------------|---------------------|--------------------------|---------------------|------------------------------------------------------------------------------------------------------------------------------------------------------------------------------------------------------------------------------------------------------------------------------------------------------------------------------------------------------------------------------------------------------------------------------------------------------------------------------------------------------------------------------------------------------------------------------------------------------------------------------------------------------------------------------|-------|---------|
|                       |                 |                     |                          |                     | >ref NP_201047.1  SMC2 (STRUCTURAL MAINTENANCE OF CHROMOSOMES 2) [Arabidopsis thaliana]                                                                                                                                                                                                                                                                                                                                                                                                                                                                                                                                                                                      | 1175  | 2E-44   |
|                       |                 |                     |                          |                     | >gb AAG53093.1  SMC2-1 [Arabidopsis thaliana]                                                                                                                                                                                                                                                                                                                                                                                                                                                                                                                                                                                                                                | 1175  | 2E-44   |
|                       |                 |                     |                          |                     | >gb AAG27593.2  SMC2-like condensin [Arabidopsis thaliana]gb AAK58634.1  SMC2-like condensin [Arabidopsis thaliana]                                                                                                                                                                                                                                                                                                                                                                                                                                                                                                                                                          | 1177  | 2E-44   |
| DV549967              | 1.61E-02        | Mo17<B73=F1         | 1.28                     | 11                  | >ref XP_468478.1  putative Vacuolar ATP synthase subunit F [Oryza sativa (japonica cultivar-group)] dbj BAD22867.1  putative Vacuolar ATP synthase subunit F [Oryza sativa (japonica cultivar-group)]                                                                                                                                                                                                                                                                                                                                                                                                                                                                        | 130   | 2E-58   |
|                       |                 |                     |                          |                     | >ref NP_192171.1  hydrogen-transporting ATP synthase, rotational mechanism /hydrogen-transporting ATPase, rotational mechanism [Arabidopsis thaliana]                                                                                                                                                                                                                                                                                                                                                                                                                                                                                                                        |       |         |
|                       |                 |                     |                          |                     | gb AAC78269.1  putative vacuolar ATPase [Arabidopsis thaliana] emb CAB80755.1  putative vacuolar ATPase [Arabidopsis thaliana] gb AAM51311.1  putative vacuolar ATPase [Arabidopsis thaliana] gb AAL38753.1  putative vacuolar ATPase [Arabidopsis thaliana] gb AAM60868.1  putative vacuolar ATPase [Arabidopsis thaliana] pir T01087 H+-exporting ATPase (EC 3.6.3.6) 14K chain, vacuolar - Arabidopsis thaliana sp QZQX4 VATF_ARATH Probable vacuolar ATP synthase subunit F (V-ATPase F subunit) (Vacuolar proton pump F subunit) (V-ATPase 14 kDa subunit)                                                                                                              | 128   | 2E-52   |
|                       |                 |                     |                          |                     | >gb ABC60334.1  putative vacuolar ATP synthase subunit F [Musa acuminata]                                                                                                                                                                                                                                                                                                                                                                                                                                                                                                                                                                                                    | 117   | 2E-47   |
|                       |                 |                     |                          |                     | >ref XP_645434.1  hypothetical protein DDB0216933 [Dictyostelium discoideum]gb EAL71520.1  hypothetical protein DDB0216933 [Dictyostelium discoideum]                                                                                                                                                                                                                                                                                                                                                                                                                                                                                                                        | 120   | 1E-31   |
|                       |                 |                     |                          |                     | >emb CAE57827.1  Hypothetical protein CBG00852 [Caenorhabditis briggsae]                                                                                                                                                                                                                                                                                                                                                                                                                                                                                                                                                                                                     | 121   | 2E-31   |
| DV622539              | 1.61E-02        | B73<Mo17            | 1.26                     | 3                   | >ref NP_922506.1  unknown protein [Oryza sativa (japonica cultivar-group)]gb AAM88632.1  unknown protein [Oryza sativa (japonica cultivar-group)]                                                                                                                                                                                                                                                                                                                                                                                                                                                                                                                            | 246   | 1E-49   |
|                       |                 |                     |                          |                     | gb AAP54793.1  expressed protein [Oryza sativa (japonica cultivar-group)]                                                                                                                                                                                                                                                                                                                                                                                                                                                                                                                                                                                                    |       |         |
|                       |                 |                     |                          |                     | >ref NP_194298.1  unknown protein [Arabidopsis thaliana]emb CAB81378.1  putative protein [Arabidopsis thaliana] emb CAB43699.1  putative protein [Arabidopsis thaliana] gb AAM61523.1  unknown [Arabidopsis thaliana] gb AAO24562.1  At4g25680 [Arabidopsis thaliana]                                                                                                                                                                                                                                                                                                                                                                                                        | 252   | 5E-32   |
|                       |                 |                     |                          |                     | >ref NP_194296.1  unknown protein [Arabidopsis thaliana]emb CAB81376.1  putative protein [Arabidopsis thaliana] emb CAB43697.1  putative protein [Arabidopsis thaliana] gb AAQ55277.1  At4g25660 [Arabidopsis thaliana] gb AAN72011.1  putative protein [Arabidopsis thaliana]                                                                                                                                                                                                                                                                                                                                                                                               | 255   | 2E-30   |
|                       |                 |                     |                          |                     | >ref XP_550459.1  unknown protein [Oryza sativa (japonica cultivar-group)]dbj BAD67713.1  unknown protein [Oryza sativa (japonica cultivar-group)]                                                                                                                                                                                                                                                                                                                                                                                                                                                                                                                           | 187   | 1E-23   |
| CB605160              | 1.61E-02        | Mo17<B73=F1         | 1.28                     | 10                  | >gb AAI02537.1  Unknown (protein for MGC:127734) [Bos taurus]                                                                                                                                                                                                                                                                                                                                                                                                                                                                                                                                                                                                                | 157   | 9E-23   |
|                       |                 |                     |                          |                     | >gb AAU12568.1  ribosomal protein S14 [Felis catus]                                                                                                                                                                                                                                                                                                                                                                                                                                                                                                                                                                                                                          | 120   | 4E-22   |
|                       |                 |                     |                          |                     | >gb AAK95196.1  40S ribosomal protein S14 [Ictalurus punctatus]                                                                                                                                                                                                                                                                                                                                                                                                                                                                                                                                                                                                              | 151   | 4E-22   |
|                       |                 |                     |                          |                     | >dbj BAC56579.1  similar to ribosomal protein S14 [Bos taurus]                                                                                                                                                                                                                                                                                                                                                                                                                                                                                                                                                                                                               | 145   | 4E-22   |
|                       |                 |                     |                          |                     | >emb CAA33143.1  unnamed protein product [Rattus norvegicus]ref NP_073163.1  ribosomal protein S14 [Rattus norvegicus] sp P13471 RS14_RAT 40S ribosomal protein S14                                                                                                                                                                                                                                                                                                                                                                                                                                                                                                          | 151   | 4E-22   |
| CA989073              | 1.62E-02        | F1=Mo17<B73         | 1.3                      | 9                   | >ref XP_463024.1  putative ribosomal protein [Oryza sativa (japonica cultivar-group)]gb AAR10854.1  putative ribosomal protein [Oryza sativa (japonica cultivar-group)]                                                                                                                                                                                                                                                                                                                                                                                                                                                                                                      | 228   | e-105   |
|                       |                 |                     |                          |                     | >gb AAM92710.1  putative 40S ribosomal protein S3 [Triticum aestivum]                                                                                                                                                                                                                                                                                                                                                                                                                                                                                                                                                                                                        | 227   | e-104   |
|                       |                 |                     |                          |                     | >ref XP_479106.1  putative 40S ribosomal protein [Oryza sativa (japonica cultivar-group)] dbj BAD32034.1  putative 40S ribosomal protein [Oryza sativa (japonica cultivar-group)] gb AAK55780.1  Putative 40S ribosomal protein; contains C-terminal domain [Oryza sativa] dbj BAC84635.1  putative 40S ribosomal protein [Oryza sativa (japonica cultivar-group)]                                                                                                                                                                                                                                                                                                           | 233   | e-101   |
|                       |                 |                     |                          |                     | >gb ABB87113.1  unknown [Solanum tuberosum]                                                                                                                                                                                                                                                                                                                                                                                                                                                                                                                                                                                                                                  | 238   | 4E-99   |
|                       |                 |                     |                          |                     | >ref NP_198403.1  structural constituent of ribosome [Arabidopsis thaliana]gb AAM19959.1  AT5g35530/MOK9_14 [Arabidopsis thaliana] gb AAL24165.1  AT5g35530/MOK9_14 [Arabidopsis thaliana] dbj BAB08712.1  40S ribosomal protein S3 [Arabidopsis thaliana]                                                                                                                                                                                                                                                                                                                                                                                                                   | 248   | 8E-99   |
| CB833692              | 1.62E-02        | Mo17<B73=F1         | 1.23                     | 10                  | >ref XP_464199.1  putative ribosomal protein S14 [Oryza sativa (japonica cultivar-group)] ref XP_506724.1  PREDICTED OJ9003_G05.34 gene product [Oryza sativa (japonica cultivar-group)] dbj BAD25218.1  putative ribosomal protein S14 [Oryza sativa (japonica cultivar-group)]                                                                                                                                                                                                                                                                                                                                                                                             | 150   | 1E-62   |
|                       |                 |                     |                          |                     | >sp P19950 RS141 MAIZE 40S ribosomal protein S14 (Clone MCH1)                                                                                                                                                                                                                                                                                                                                                                                                                                                                                                                                                                                                                | 149   | 1E-61   |
|                       |                 |                     |                          |                     | >ref XP_472410.1  OJ000126_13.9 [Oryza sativa (japonica cultivar-group)]emb CAE02065.2  OJ000126_13.9 [Oryza sativa (japonica cultivar-group)] dbj BAD29299.1  40S ribosomal protein S14 [Oryza sativa (japonica cultivar-group)] dbj BAD27798.1  40S ribosomal protein S14 [Oryza sativa (japonica cultivar-group)]                                                                                                                                                                                                                                                                                                                                                         | 151   | 1E-61   |
|                       |                 |                     |                          |                     | >gb AAO41731.1  cytoplasmic ribosomal protein S14 [Brassica napus]                                                                                                                                                                                                                                                                                                                                                                                                                                                                                                                                                                                                           | 150   | 4E-60   |
|                       |                 |                     |                          |                     | >gb ABC01912.1  ribosomal protein S14-like protein [Solanum tuberosum]gb ABB87124.1  hypothetical protein [Solanum tuberosum]                                                                                                                                                                                                                                                                                                                                                                                                                                                                                                                                                | 150   | 6E-60   |
|                       |                 |                     |                          |                     | >ref NP_910584.1  EST AU082567(S21715) corresponds to a region of the predicted gene.~Similar to S.tuberosum ubiquinol cytochrome c reductase. (X79275) [Oryza sativa (japonica cultivar-group)] ref NP_910574.1  EST AU082567(S21715) corresponds to a region of the predicted gene.~Similar to S.tuberosum ubiquinol-cytochrome c reductase. (X79275) [Oryza sativa (japonica cultivar-group)] dbj BAA95831.1  putative ubiquinol-cytochrome C reductase complex ubiquinone-binding protein [Oryza sativa (japonica cultivar-group)] dbj BAA95821.1  putative ubiquinol-cytochrome C reductase complex ubiquinone-binding protein [Oryza sativa (japonica cultivar-group)] | 72    | 6E-34   |
| BM340717              | 1.62E-02        | Mo17<B73=F1         | 1.3                      | 11                  | >ref NP_187697.1  ubiquinol-cytochrome-c reductase [Arabidopsis thaliana]gb AAF19563.1  putative ubiquinol-cytochrome C reductase complex ubiquinone-binding protein (QP-C) [Arabidopsis thaliana] gb AAN17451.1  putative ubiquinol-cytochrome C reductase complex ubiquinone-binding protein (QP-C) [Arabidopsis thaliana] gb AAP21315.1  At3g10860 [Arabidopsis thaliana] gb AAM64437.1  putative ubiquinol-cytochrome C reductase complex ubiquinone-binding protein (QP-C) [Arabidopsis thaliana]                                                                                                                                                                       | 72    | 8E-28   |
|                       |                 |                     |                          |                     | >ref NP_196156.1  ubiquinol-cytochrome-c reductase [Arabidopsis thaliana]gb AAQ65099.1  At5g05370 [Arabidopsis thaliana] dbj BAB09980.1  ubiquinol-cytochrome C reductase complex ubiquinone-binding protein [Arabidopsis thaliana]                                                                                                                                                                                                                                                                                                                                                                                                                                          | 72    | 3E-26   |

**Table 4. Microarray analysis results, mode of gene action classification, and BLAST annotation for the 1,367 ESTs identified as differentially expressed among genotypes (15% FDR)**

| GenBank accession no. | Overall P value | Significant pattern | Fold change <sup>†</sup> | Sector <sup>‡</sup> | BLAST annotation*                                                                                                                                                                                                                                                                                                                                                                                                                                                                    | Score | E value |
|-----------------------|-----------------|---------------------|--------------------------|---------------------|--------------------------------------------------------------------------------------------------------------------------------------------------------------------------------------------------------------------------------------------------------------------------------------------------------------------------------------------------------------------------------------------------------------------------------------------------------------------------------------|-------|---------|
|                       |                 |                     |                          |                     | >emb CAA55862.1  ubiquinol--cytochrome c reductase [Solanum tuberosum]sp P46269 UCRQ_SOLTU Ubiquinol-cytochrome c reductase complex ubiquinone-binding protein QP-C (Ubiquinol-cytochrome c reductase complex 8.2 kDa protein) prf 2107179A cytochrome c oxidase:SUBUNIT=8.2kD                                                                                                                                                                                                       | 72    | 4E-26   |
|                       |                 |                     |                          |                     | >gb AAP80673.1  cytochrome reductase [Triticum aestivum]                                                                                                                                                                                                                                                                                                                                                                                                                             | 115   | 5E-12   |
| CD001357              | 1.62E-02        | B73<F1=Mo17         | 1.27                     | 3                   | >sp P49036 SUS2_MAIZE Sucrose synthase 2 (Sucrose-UDP glucosyltransferase 2)gb AAA33515.1  sucrose synthase 2 gb AAA33514.1  UDP-glucose:D-fructose 2-glucosyl-transferase                                                                                                                                                                                                                                                                                                           | 816   | 1E-75   |
|                       |                 |                     |                          |                     | >gb AAA68209.1  sus1 gene product                                                                                                                                                                                                                                                                                                                                                                                                                                                    | 816   | 3E-75   |
|                       |                 |                     |                          |                     | >gb AAK52129.1  sucrose-UDP glucosyltransferase 2 [Oryza sativa (japonica cultivar-group)] ref NP_909830.1  sucrose-UDP glucosyltransferase 2 [Oryza sativa]                                                                                                                                                                                                                                                                                                                         |       |         |
|                       |                 |                     |                          |                     | emb CAA41774.1  sucrose-UDP glucosyltransferase (isoenzyme 2) [Oryza sativa (japonica cultivar-group)] sp P31924 SUS2_ORYSA Sucrose synthase 2 (Sucrose-UDP glucosyltransferase 2) prf 2207194A sucrose synthase:ISOTYPE=2                                                                                                                                                                                                                                                           | 816   | 3E-72   |
|                       |                 |                     |                          |                     | >gb AAV64256.2  sucrose synthase [Bambusa oldhamii]                                                                                                                                                                                                                                                                                                                                                                                                                                  | 816   | 5E-72   |
|                       |                 |                     |                          |                     | >gb AAL50570.1  sucrose synthase [Bambusa oldhamii]                                                                                                                                                                                                                                                                                                                                                                                                                                  | 816   | 1E-71   |
| DV491449              | 1.62E-02        | B73<F1=Mo17         | 1.45                     | 3                   | >ref XP_467761.1  putative ATPase [Oryza sativa (japonica cultivar-group)]dbj BAD16127.1  putative ATPase [Oryza sativa (japonica cultivar-group)]                                                                                                                                                                                                                                                                                                                                   | 406   | 2E-34   |
|                       |                 |                     |                          |                     | dbj BAD15543.1  putative ATPase [Oryza sativa (japonica cultivar-group)]                                                                                                                                                                                                                                                                                                                                                                                                             | 411   | 4E-32   |
|                       |                 |                     |                          |                     | >ref NP_187646.2  ATP binding [Arabidopsis thaliana]                                                                                                                                                                                                                                                                                                                                                                                                                                 | 386   | 2E-29   |
|                       |                 |                     |                          |                     | >gb AAF02825.1  putative ATPase [Arabidopsis thaliana]                                                                                                                                                                                                                                                                                                                                                                                                                               | 391   | 1E-28   |
|                       |                 |                     |                          |                     | >ref NP_200881.2  ATP binding [Arabidopsis thaliana]gb AAV43781.1  At5g60730 [Arabidopsis thaliana] gb AAU84673.1  At5g60730 [Arabidopsis thaliana]                                                                                                                                                                                                                                                                                                                                  | 417   | 1E-28   |
|                       |                 |                     |                          |                     | >dbj BAB09846.1  arsenite translocating ATPase-like protein [Arabidopsis thaliana]                                                                                                                                                                                                                                                                                                                                                                                                   |       |         |
| DV494555              | 1.63E-02        | B73=F1<Mo17         | 1.48                     | 5                   | ns                                                                                                                                                                                                                                                                                                                                                                                                                                                                                   |       |         |
| CB833751              | 1.63E-02        | B73<F1=Mo17         | 1.22                     | 3                   | >ref XP_465873.1  ubiquitin-associated (UBA)/TS-N domain-containing protein-like [Oryza sativa (japonica cultivar-group)] dbj BAD23227.1  ubiquitin-associated (UBA)/TS-N domain-containing protein-like [Oryza sativa (japonica cultivar-group)]                                                                                                                                                                                                                                    | 414   | 5E-70   |
|                       |                 |                     |                          |                     | >ref NP_563718.1  nucleic acid binding / zinc ion binding [Arabidopsis thaliana]gb AAN15466.1  Unknown protein [Arabidopsis thaliana] gb AAL32687.1  Unknown protein [Arabidopsis thaliana] gb AAM65971.1  unknown [Arabidopsis thaliana] gb AAF40452.1  ESTs gb N65605, gb N38087, gb T20485, gb T13726, gb N38339, gb F15440 and gb N97201 come from this gene. [Arabidopsis thaliana]                                                                                             | 413   | 7E-54   |
|                       |                 |                     |                          |                     | >ref XP_483435.1  hypothetical protein [Oryza sativa (japonica cultivar-group)]dbj BAD08748.1  hypothetical protein [Oryza sativa (japonica cultivar-group)]                                                                                                                                                                                                                                                                                                                         | 417   | 1E-14   |
|                       |                 |                     |                          |                     | >gb AAU44584.1  hypothetical protein AT5G48690 [Arabidopsis thaliana]                                                                                                                                                                                                                                                                                                                                                                                                                | 193   | 3E-9    |
|                       |                 |                     |                          |                     | >ref NP_199680.2  unknown protein [Arabidopsis thaliana]gb AAU44583.1  hypothetical protein AT5G48690 [Arabidopsis thaliana] gb AAX23931.1  hypothetical protein AT5g48690 [Arabidopsis thaliana]                                                                                                                                                                                                                                                                                    | 323   | 3E-9    |
| DV549419              | 1.63E-02        | B73=Mo17<F1         | 1.34                     | 12                  | >dbj BAB72003.1  single-strand DNA endonuclease-1 [Oryza sativa (japonica cultivar-group)]                                                                                                                                                                                                                                                                                                                                                                                           | 641   | 4E-6    |
| CD568523              | 1.63E-02        | Mo17<B73=F1         | 1.62                     | 11                  | >gb AAB94293.1  polyphenol oxidase                                                                                                                                                                                                                                                                                                                                                                                                                                                   | 615   | 1E-12   |
| CD527510              | 1.64E-02        | B73<Mo17            | 1.4                      | 4                   | ns                                                                                                                                                                                                                                                                                                                                                                                                                                                                                   |       |         |
| BM337218              | 1.64E-02        | Mo17<B73            | 1.95                     | 10                  | >ref XP_472671.1  OSJNBa0086B14.13 [Oryza sativa (japonica cultivar-group)]emb CAD40841.3  OSJNBa0086B14.13 [Oryza sativa (japonica cultivar-group)]                                                                                                                                                                                                                                                                                                                                 | 491   | 8E-26   |
|                       |                 |                     |                          |                     | >ref XP_466409.1  putative glucosyltransferase-10 [Oryza sativa (japonica cultivar-group)] dbj BAD34262.1  putative glucosyltransferase-10 [Oryza sativa (japonica cultivar-group)]                                                                                                                                                                                                                                                                                                  | 487   | 2E-21   |
|                       |                 |                     |                          |                     | >ref XP_466413.1  putative UDP-glycosyltransferase 85A8 [Oryza sativa (japonica cultivar-group)] dbj BAD29561.1  putative UDP-glycosyltransferase 85A8 [Oryza sativa (japonica cultivar-group)] dbj BAD34266.1  putative UDP-glycosyltransferase 85A8 [Oryza sativa (japonica cultivar-group)]                                                                                                                                                                                       | 493   | 2E-20   |
|                       |                 |                     |                          |                     | >ref XP_471822.1  OSJNBb0026L04.6 [Oryza sativa (japonica cultivar-group)]emb CAE01501.2  OSJNBb0026L04.6 [Oryza sativa (japonica cultivar-group)]                                                                                                                                                                                                                                                                                                                                   | 476   | 3E-20   |
|                       |                 |                     |                          |                     | >ref XP_471860.1  OSJNBb0033P05.8 [Oryza sativa (japonica cultivar-group)]emb CAE05669.3  OSJNBb0033P05.8 [Oryza sativa (japonica cultivar-group)]                                                                                                                                                                                                                                                                                                                                   | 492   | 3E-19   |
|                       |                 |                     |                          |                     | >ref XP_476718.1  putative prolyl-tRNA synthetase [Oryza sativa (japonica cultivar-group)] dbj BAC79747.1  putative prolyl-tRNA synthetase [Oryza sativa (japonica cultivar-group)]                                                                                                                                                                                                                                                                                                  | 545   | 1E-71   |
| DV491619              | 1.64E-02        | B73=F1<Mo17         | 1.5                      | 4                   | >ref NP_200065.1  ATP binding / proline-tRNA ligase/ tRNA ligase [Arabidopsis thaliana] gb AAQ65189.1  At5g52520 [Arabidopsis thaliana] dbj BAD44184.1  prolyl tRNA synthetase [Arabidopsis thaliana] dbj BAB10183.1  prolyl tRNA synthetase [Arabidopsis thaliana]                                                                                                                                                                                                                  | 543   | 1E-60   |
|                       |                 |                     |                          |                     | >dbj BAC78195.1  prolyl-tRNA synthetase [Raphanus sativus]                                                                                                                                                                                                                                                                                                                                                                                                                           | 544   | 2E-58   |
|                       |                 |                     |                          |                     | >ref ZP_00768136.1  Prolyl-tRNA synthetase, archaeal and euk type [Chloroflexus aurantiacus J-10-fl] gb EAO58777.1  Prolyl-tRNA synthetase, archaeal and euk type [Chloroflexus aurantiacus J-10-fl]                                                                                                                                                                                                                                                                                 | 480   | 7E-31   |
|                       |                 |                     |                          |                     | >emb CAH08215.1  prolyl-tRNA synthetase [Bacteroides fragilis NCTC 9343]dbj BAD49183.1  prolyl-tRNA synthetase [Bacteroides fragilis YCH46]                                                                                                                                                                                                                                                                                                                                          |       |         |
|                       |                 |                     |                          |                     | ref YP_099717.1  prolyl-tRNA synthetase [Bacteroides fragilis YCH46] ref YP_212139.1  prolyl-tRNA synthetase [Bacteroides fragilis NCTC 9343]                                                                                                                                                                                                                                                                                                                                        | 497   | 1E-22   |
| CB617023              | 1.64E-02        | B73<F1=Mo17         | 1.27                     | 2                   | ns                                                                                                                                                                                                                                                                                                                                                                                                                                                                                   |       |         |
| CB885490              | 1.64E-02        | B73<F1=Mo17         | 1.2                      | 3                   | >ref XP_464508.1  26S proteasome regulatory particle triple-A ATPase subunit4 [Oryzasativa (japonica cultivar-group)] dbj BAD25481.1  26S proteasome regulatory particle triple-A ATPase subunit4 [Oryza sativa (japonica cultivar-group)] dbj BAD15843.1  26S proteasome regulatory particle triple-A ATPase subunit4 [Oryza sativa (japonica cultivar-group)] dbj BAB17625.1  26S proteasome regulatory particle triple-A ATPase subunit4 [Oryza sativa (japonica cultivar-group)] | 400   | 8E-85   |
|                       |                 |                     |                          |                     | >dbj BAD36121.1  putative 26S proteasome regulatory particle triple-A ATPasesubunit4 [Oryza sativa (japonica cultivar-group)] dbj BAD35613.1  putative 26S proteasome regulatory particle triple-A ATPase subunit4 [Oryza sativa (japonica cultivar-group)]                                                                                                                                                                                                                          | 401   | 3E-78   |



**Table 4. Microarray analysis results, mode of gene action classification, and BLAST annotation for the 1,367 ESTs identified as differentially expressed among genotypes (15% FDR)**

| GenBank accession no. | Overall P value | Significant pattern | Fold change <sup>‡</sup> | Sector <sup>‡</sup> | BLAST annotation*                                                                                                                                                                                                                                                                                                                                        | Score | E value |
|-----------------------|-----------------|---------------------|--------------------------|---------------------|----------------------------------------------------------------------------------------------------------------------------------------------------------------------------------------------------------------------------------------------------------------------------------------------------------------------------------------------------------|-------|---------|
|                       |                 |                     |                          |                     | >ref NP_175120.1  ATP binding / ATPase/ hydrolase/ nucleoside-triphosphatase/nucleotide binding [Arabidopsis thaliana] gb AAM47992.1  26S proteasome AAA-ATPase subunit RPT4a-like protein [Arabidopsis thaliana] gb AAL32787.1  similar to 26S proteasome AAA-ATPase subunit RPT4a [Arabidopsis thaliana] gb AAF69154.1  F27F5.8 [Arabidopsis thaliana] | 399   | 5E-77   |
|                       |                 |                     |                          |                     | >ref NP_199115.1  RPT4A; ATPase [Arabidopsis thaliana]gb AAL7774.1  AT5g43010/MBD2_21 [Arabidopsis thaliana] gb AAK50085.1  AT5g43010/MBD2_21 [Arabidopsis thaliana] dbj BAB09203.1  26S proteasome AAA-ATPase subunit RPT4a [Arabidopsis thaliana] gb AAF22524.1  26S proteasome AAA-ATPase subunit RPT4a [Arabidopsis thaliana]                        | 399   | 5E-75   |
|                       |                 |                     |                          |                     | >gb ABA40428.1  26S proteasome AAA-ATPase subunit RPT4a-like protein [Solanum tuberosum] dbj BAC23035.1  26S proteasome AAA-ATPase subunit RPT4a [Solanum tuberosum]                                                                                                                                                                                     | 398   | 6E-75   |
| DV551276              | 1.64E-02        | B73<Mo17            | 1.42                     | 4                   | >dbj BAD28168.1  putative LepA protein [Oryza sativa (japonica cultivar-group)]dbj BAD28023.1  putative LepA protein [Oryza sativa (japonica cultivar-group)]                                                                                                                                                                                            | 680   | 8E-38   |
|                       |                 |                     |                          |                     | >gb AAM91119.1  GTP-binding protein LepA-like protein [Arabidopsis thaliana]gb AAM12957.1  GTP-binding protein LepA homolog [Arabidopsis thaliana]                                                                                                                                                                                                       | 681   | 4E-36   |
|                       |                 |                     |                          |                     | >dbj BAB10014.1  GTP-binding protein LepA homolog [Arabidopsis thaliana]                                                                                                                                                                                                                                                                                 | 675   | 4E-36   |
|                       |                 |                     |                          |                     | >ref NP_196482.2  GTP binding / translation elongation factor [Arabidopsis thaliana]                                                                                                                                                                                                                                                                     | 681   | 4E-36   |
|                       |                 |                     |                          |                     | >ref ZP_00518999.1  Small GTP-binding protein domain:GTP-binding protein LepA[Crocospaera watsonii WH 8501] gb EAM47913.1  Small GTP-binding protein domain:GTP-binding protein LepA [Crocospaera watsonii WH 8501]                                                                                                                                      | 603   | 1E-29   |
| DV491119              | 1.64E-02        | B73<F1              | 1.26                     | 1                   | >ref XP_469531.1  putative GTP-binding protein [Oryza sativa (japonica cultivar-group)] gb AAL58207.1  putative GTP-binding protein [Oryza sativa (japonica cultivar-group)]                                                                                                                                                                             | 611   | 1E-92   |
|                       |                 |                     |                          |                     | >ref NP_172936.1  ADL1C (DYNAMIN-LIKE PROTEIN 5); GTP binding / GTPase [Arabidopsis thaliana] gb AAN12911.1  putative dynamin protein [Arabidopsis thaliana] gb AAK64059.1  putative dynamin protein [Arabidopsis thaliana] emb CAC19656.1  dynamin-like protein DLP1 [Arabidopsis thaliana]                                                             | 614   | 2E-69   |
|                       |                 |                     |                          |                     | sp Q8LF21 DRP1C ARATH Dynamin-related protein 1C (Dynamin-like protein C) (Dynamin-like protein 5) (Dynamin-like protein DLP1)                                                                                                                                                                                                                           | 614   | 2E-69   |
|                       |                 |                     |                          |                     | >gb AAL92170.1  dynamin-like protein C [Arabidopsis thaliana]                                                                                                                                                                                                                                                                                            | 611   | 2E-69   |
|                       |                 |                     |                          |                     | >gb AAF22293.1  dynamin-like protein 5 [Arabidopsis thaliana]                                                                                                                                                                                                                                                                                            | 614   | 2E-69   |
|                       |                 |                     |                          |                     | >gb AAM61645.1  dynamin, putative [Arabidopsis thaliana]                                                                                                                                                                                                                                                                                                 | 614   | 6E-69   |
| CB381671              | 1.64E-02        | B73<F1=Mo17         | 1.32                     | 3                   | >emb CAA55022.1  beta tubulin [Oryza sativa (japonica cultivar-group)]                                                                                                                                                                                                                                                                                   | 447   | 2E-50   |
|                       |                 |                     |                          |                     | >emb CAE52516.1  beta tubulin [Setaria viridis]                                                                                                                                                                                                                                                                                                          | 448   | 2E-50   |
|                       |                 |                     |                          |                     | >ref NP_915874.1  tubulin beta chain [Oryza sativa (japonica cultivar-group)]dbj BAB92274.1  beta-tubulin [Oryza sativa (japonica cultivar-group)]                                                                                                                                                                                                       | 447   | 2E-50   |
|                       |                 |                     |                          |                     | dbj BAA06381.1  beta-tubulin [Oryza sativa (japonica cultivar-group)] sp P45960 TBB4 ORYSA Tubulin beta-4 chain (Beta-4 tubulin)                                                                                                                                                                                                                         | 447   | 2E-50   |
|                       |                 |                     |                          |                     | >gb AAA66495.1  beta-tubulin                                                                                                                                                                                                                                                                                                                             | 447   | 2E-50   |
|                       |                 |                     |                          |                     | >sp Q41783 TBB6 MAIZE Tubulin beta-6 chain (Beta-6 tubulin)gb AAA20186.1  beta-6 tubulin                                                                                                                                                                                                                                                                 | 446   | 2E-50   |
| BM074017              | 1.64E-02        | Mo17<B73=F1         | 1.26                     | 10                  | >ref XP_482582.1  putative ribosomal protein [Oryza sativa (japonica cultivar-group)]dbj BAD10146.1  putative ribosomal protein [Oryza sativa (japonica cultivar-group)]                                                                                                                                                                                 | 118   | 3E-46   |
|                       |                 |                     |                          |                     | >ref XP_480178.1  putative ribosomal protein L34 [Oryza sativa (japonica cultivar-group)] dbj BAC99505.1  putative ribosomal protein L34 [Oryza sativa (japonica cultivar-group)]                                                                                                                                                                        | 118   | 3E-46   |
|                       |                 |                     |                          |                     | >gb AAW50987.1  ribosomal protein L34 [Triticum aestivum]                                                                                                                                                                                                                                                                                                | 119   | 3E-45   |
|                       |                 |                     |                          |                     | >gb AAT38711.1  Ribosomal protein L34e [Solanum demissum]gb AAT39969.1  60S ribosomal protein L34 [Solanum demissum]                                                                                                                                                                                                                                     | 120   | 8E-44   |
|                       |                 |                     |                          |                     | >sp P41098 RL34 TOBAC 60S ribosomal protein L34gb AAA57159.1  60S ribosomal protein L34 gb AAA57158.1  60S ribosomal protein L34                                                                                                                                                                                                                         | 120   | 9E-43   |
| DV621521              | 1.65E-02        | Mo17<B73=F1         | 1.19                     | 10                  | >gb AAV25644.1  putative nucleic acid binding protein [Oryza sativa (japonica cultivar-group)]                                                                                                                                                                                                                                                           | 258   | 2E-36   |
|                       |                 |                     |                          |                     | >ref NP_172903.1  DNA binding / protein binding / zinc ion binding [Arabidopsis thaliana] gb AAM65633.1  nucleic acid binding protein (alfin-1), putative [Arabidopsis thaliana] gb AAP12848.1  At1g14510 [Arabidopsis thaliana]                                                                                                                         | 252   | 3E-36   |
|                       |                 |                     |                          |                     | >gb AAF43952.1  Contains similarity to an Alfalfa nucleic acid binding protein fromMedicago sativa gb L07291.1 and contains a PHD-finger PF00628 domain. ESTs gb AI995787, gb AA721930, gb T42258 come from this gene. [Arabidopsis thaliana]                                                                                                            | 273   | 3E-36   |
|                       |                 |                     |                          |                     | >gb AAY27262.1  putative alfin-like transcription factor [Solanum tuberosum]                                                                                                                                                                                                                                                                             | 248   | 3E-35   |
|                       |                 |                     |                          |                     | >gb AAX95841.1  probable zinc finger protein - alfalfa (fragment) [Oryza sativa(japonica cultivar-group)] gb AAX92933.1  probable zinc finger protein - alfalfa (fragment) [Oryza sativa (japonica cultivar-group)] gb ABA92392.1  zinc finger protein, putative [Oryza sativa (japonica cultivar-group)]                                                | 264   | 4E-35   |
| CB885309              | 1.65E-02        | Mo17<B73=F1         | 1.18                     | 11                  | >gb AAL76334.1  putative G-box binding protein [Oryza sativa]dbj BAD45657.1  G-box binding protein-like [Oryza sativa (japonica cultivar-group)]                                                                                                                                                                                                         | 89    | 4E-40   |
|                       |                 |                     |                          |                     | gb AAB65433.1  HvB12D homolog [Oryza sativa]                                                                                                                                                                                                                                                                                                             | 87    | 2E-38   |
|                       |                 |                     |                          |                     | >emb CAA70936.1  B12Dg1 [Hordeum vulgare subsp. vulgare]emb CAA54065.1  HvB12D [Hordeum vulgare subsp. vulgare]                                                                                                                                                                                                                                          | 90    | 2E-33   |
|                       |                 |                     |                          |                     | >gb AAD22104.1  B12D protein [Ipomoea batatas]                                                                                                                                                                                                                                                                                                           | 88    | 2E-31   |
|                       |                 |                     |                          |                     | >ref NP_190397.1  unknown protein [Arabidopsis thaliana]emb CAB51061.1  B12D-like protein [Arabidopsis thaliana] gb AAL91215.1  B12D-like protein [Arabidopsis thaliana] gb AAN65070.1  B12D-like protein [Arabidopsis thaliana] pir T13003 hypothetical protein T24C20.20 - Arabidopsis thaliana                                                        | 88    | 2E-31   |
|                       |                 |                     |                          |                     | >ref XP_477421.1  putative B12D protein [Oryza sativa (japonica cultivar-group)]dbj BAC84633.1  putative B12D protein [Oryza sativa (japonica cultivar-group)]                                                                                                                                                                                           | 98    | 1E-28   |
|                       |                 |                     |                          |                     | dbj BAD31625.1  putative B12D protein [Oryza sativa (japonica cultivar-group)]                                                                                                                                                                                                                                                                           | 98    | 1E-28   |
| CB331016              | 1.66E-02        | B73=Mo17<F1         | 1.33                     | 1                   | >gb AAU10700.1  putative glucose-1-phosphate adenylyltransferase [Oryza sativa(japonica cultivar-group)]                                                                                                                                                                                                                                                 | 519   | 6E-13   |
|                       |                 |                     |                          |                     | >gb AAD39597.1  10A19L12 [Oryza sativa (japonica cultivar-group)]                                                                                                                                                                                                                                                                                        | 529   | 6E-13   |

**Table 4. Microarray analysis results, mode of gene action classification, and BLAST annotation for the 1,367 ESTs identified as differentially expressed among genotypes (15% FDR)**

| GenBank accession no. | Overall P value | Significant pattern | Fold change <sup>†</sup> | Sector <sup>‡</sup> | BLAST annotation*                                                                                                                                                                                                                                                                                                                                             | Score | E value |
|-----------------------|-----------------|---------------------|--------------------------|---------------------|---------------------------------------------------------------------------------------------------------------------------------------------------------------------------------------------------------------------------------------------------------------------------------------------------------------------------------------------------------------|-------|---------|
|                       |                 |                     |                          |                     | >dbj BAA23490.1  ADP glucose pyrophosphorylase large subunit [Oryza sativa (japonica cultivar-group)]                                                                                                                                                                                                                                                         | 519   | 6E-13   |
|                       |                 |                     |                          |                     | >emb CAD98749.1  ADP-glucose pyrophosphorylase large subunit [Triticum aestivum]                                                                                                                                                                                                                                                                              | 522   | 1E-12   |
|                       |                 |                     |                          |                     | >emb CAA79980.1  ADP-glucose pyrophosphorylase large subunit [Triticum aestivum]sp P12299 GLGL2_WHEAT Glucose-1-phosphate adenylyltransferase large subunit, chloroplast precursor (ADP-glucose synthase) (ADP-glucose pyrophosphorylase) (AGPASE S) (Alpha-D-glucose-1-phosphate adenylyl transferase)                                                       | 522   | 1E-12   |
| CB250119              | 1.66E-02        | B73<F1=Mo17         | 1.31                     | 2                   | ns                                                                                                                                                                                                                                                                                                                                                            |       |         |
| DV489836              | 1.66E-02        | B73<F1=Mo17         | 1.64                     | 3                   | >ref XP_467554.1  putative proliferating cell nuclear protein P120 [Oryza sativa(japonica cultivar-group)] dbj BAD13040.1  putative proliferating cell nuclear protein P120 [Oryza sativa (japonica cultivar-group)] dbj BAD12915.1  putative proliferating cell nuclear protein P120 [Oryza sativa (japonica cultivar-group)]                                | 682   | 4E-12   |
|                       |                 |                     |                          |                     | >dbj BAD33889.1  putative nucleolar protein [Oryza sativa (japonica cultivar-group)]                                                                                                                                                                                                                                                                          | 699   | 3E-8    |
| DV622298              | 1.67E-02        | B73<F1=Mo17         | 1.34                     | 3                   | >ref XP_483358.1  unknown protein [Oryza sativa (japonica cultivar-group)]dbj BAD09694.1  unknown protein [Oryza sativa (japonica cultivar-group)]                                                                                                                                                                                                            | 447   | 5E-44   |
|                       |                 |                     |                          |                     | >ref NP_188661.2  unknown protein [Arabidopsis thaliana]dbj BAD94700.1  hypothetical protein [Arabidopsis thaliana] gb AAM97062.1  unknown protein [Arabidopsis thaliana] gb AAN72131.1  unknown protein [Arabidopsis thaliana]                                                                                                                               | 437   | 1E-24   |
|                       |                 |                     |                          |                     | >ref NP_177526.2  unknown protein [Arabidopsis thaliana]gb AAS99684.1  At1g73850 [Arabidopsis thaliana] gb AAR92284.1  At1g73850 [Arabidopsis thaliana]                                                                                                                                                                                                       | 559   | 2E-12   |
|                       |                 |                     |                          |                     | >ref NP_909111.1  unknown protein [Oryza sativa (japonica cultivar-group)]dbj BAB03388.1  unknown protein [Oryza sativa (japonica cultivar-group)]                                                                                                                                                                                                            | 633   | 5E-12   |
|                       |                 |                     |                          |                     | >gb AAG52080.1  unknown protein; 95319-98330 [Arabidopsis thaliana]                                                                                                                                                                                                                                                                                           | 651   | 2E-10   |
| DV942434              | 1.67E-02        | F1=Mo17<B73         | 1.62                     | 9                   | >dbj BAD82523.1  microtubule-associated protein-like [Oryza sativa (japonica cultivar-group)]                                                                                                                                                                                                                                                                 | 689   | 7E-43   |
|                       |                 |                     |                          |                     | >gb AAT85198.1  unknown protein [Oryza sativa (japonica cultivar-group)]                                                                                                                                                                                                                                                                                      | 662   | 2E-38   |
|                       |                 |                     |                          |                     | >gb AAT40494.1  putative microtubule-associated protein [Solanum demissum]                                                                                                                                                                                                                                                                                    | 730   | 1E-31   |
|                       |                 |                     |                          |                     | >ref NP_199973.1  PLE (PLEIADE) [Arabidopsis thaliana]dbj BAB08676.1  unnamed protein product [Arabidopsis thaliana]                                                                                                                                                                                                                                          | 707   | 8E-28   |
|                       |                 |                     |                          |                     | >ref NP_201031.1  unknown protein [Arabidopsis thaliana]gb AAY78877.1  microtubule associated protein [Arabidopsis thaliana]                                                                                                                                                                                                                                  | 549   | 1E-23   |
| DV496057              | 1.67E-02        | Mo17<B73=F1         | 1.34                     | 11                  | >dbj BAD73292.1  putative ATP-dependent Clp protease, proteolytic subunit [Oryzasativa (japonica cultivar-group)]                                                                                                                                                                                                                                             | 308   | 5E-92   |
|                       |                 |                     |                          |                     | >gb AAM54134.1  ATP-dependent Clp protease [Oryza sativa (indica cultivar-group)]                                                                                                                                                                                                                                                                             | 191   | 1E-89   |
|                       |                 |                     |                          |                     | >ref NP_918617.1  putative ATP-dependent Clp protease [Oryza sativa (japonica cultivar-group)]                                                                                                                                                                                                                                                                | 317   | 1E-89   |
|                       |                 |                     |                          |                     | >ref NP_564880.1  CLPP3; endopeptidase Clp [Arabidopsis thaliana]gb AAM64899.1  ATP-dependent Clp protease proteolytic subunit ClpP3 [Arabidopsis thaliana] gb AAG60075.1  ATP-dependent Clp protease (nClpP3) [Arabidopsis thaliana] gb AAG51173.1  ATP-dependent Clp protease (nClpP3) [Arabidopsis thaliana] dbj BAA82067.1  nClpP3 [Arabidopsis thaliana] | 309   | 2E-59   |
|                       |                 |                     |                          |                     | >gb AAC35489.1  clp protease [Arabidopsis thaliana]                                                                                                                                                                                                                                                                                                           | 310   | 2E-59   |
| DV549666              | 1.67E-02        | B73<F1=Mo17         | 1.23                     | 2                   | >ref XP_477421.1  putative B12D protein [Oryza sativa (japonica cultivar-group)]dbj BAC84633.1  putative B12D protein [Oryza sativa (japonica cultivar-group)]                                                                                                                                                                                                | 98    | 5E-33   |
|                       |                 |                     |                          |                     | dbj BAD31625.1  putative B12D protein [Oryza sativa (japonica cultivar-group)]                                                                                                                                                                                                                                                                                |       |         |
|                       |                 |                     |                          |                     | >gb AAL76334.1  putative G-box binding protein [Oryza sativa]dbj BAD45657.1  G-box binding protein-like [Oryza sativa (japonica cultivar-group)]                                                                                                                                                                                                              | 89    | 6E-30   |
|                       |                 |                     |                          |                     | gb AAB65433.1  HvB12D homolog [Oryza sativa]                                                                                                                                                                                                                                                                                                                  | 90    | 8E-30   |
|                       |                 |                     |                          |                     | >gb AAD22104.1  B12D protein [Ipomoea batatas]                                                                                                                                                                                                                                                                                                                |       |         |
|                       |                 |                     |                          |                     | >ref NP_190397.1  unknown protein [Arabidopsis thaliana]emb CAB51061.1  B12D-like protein [Arabidopsis thaliana] gb AAL91215.1  B12D-like protein [Arabidopsis thaliana] gb AAN65070.1  B12D-like protein [Arabidopsis thaliana] pir T13003 hypothetical protein T24C20.20 - Arabidopsis thaliana                                                             | 88    | 7E-29   |
|                       |                 |                     |                          |                     | >emb CAA70936.1  B12Dg1 [Hordeum vulgare subsp. vulgare]emb CAA54065.1  HvB12D [Hordeum vulgare subsp. vulgare]                                                                                                                                                                                                                                               | 87    | 4E-27   |
| CD001711              | 1.68E-02        | B73<F1=Mo17         | 1.3                      | 3                   | ns                                                                                                                                                                                                                                                                                                                                                            |       |         |
| CD527826              | 1.68E-02        | B73<F1=Mo17         | 1.31                     | 3                   | >emb CAA66900.2  annexin p33 [Zea mays]                                                                                                                                                                                                                                                                                                                       | 314   | 1E-97   |
|                       |                 |                     |                          |                     | >dbj BAD37678.1  putative annexin [Oryza sativa (japonica cultivar-group)]                                                                                                                                                                                                                                                                                    | 317   | 1E-85   |
|                       |                 |                     |                          |                     | >ref XP_467846.1  putative annexin P35 [Oryza sativa (japonica cultivar-group)]dbj BAD17230.1  putative annexin P35 [Oryza sativa (japonica cultivar-group)]                                                                                                                                                                                                  |       |         |
|                       |                 |                     |                          |                     | dbj BAD15571.1  putative annexin P35 [Oryza sativa (japonica cultivar-group)]                                                                                                                                                                                                                                                                                 | 314   | 1E-82   |
|                       |                 |                     |                          |                     | >emb CAA66901.1  annexin p35 [Zea mays]                                                                                                                                                                                                                                                                                                                       | 314   | 1E-78   |
|                       |                 |                     |                          |                     | >gb AAC33305.1  fiber annexin [Gossypium hirsutum]                                                                                                                                                                                                                                                                                                            | 316   | 1E-68   |
| DV621761              | 1.68E-02        | Mo17<B73=F1         | 1.27                     | 11                  | >ref XP_466633.1  unknown protein [Oryza sativa (japonica cultivar-group)]dbj BAD20133.1  unknown protein [Oryza sativa (japonica cultivar-group)]                                                                                                                                                                                                            | 243   | 2E-30   |
| CD001707              | 1.68E-02        | Mo17<B73=F1         | 1.23                     | 10                  | >gb ABA93723.1  ribosomal protein S7 [Oryza sativa (japonica cultivar-group)]                                                                                                                                                                                                                                                                                 | 199   | 9E-76   |
|                       |                 |                     |                          |                     | >ref NP_908322.1  putative 40S ribosomal protein S5 [Oryza sativa (japonica cultivar-group)] dbj BAB64234.1  putative 40S ribosomal protein S5 [Oryza sativa (japonica cultivar-group)] dbj BAB62621.1  putative 40S ribosomal protein S5 [Oryza sativa (japonica cultivar-group)]                                                                            | 200   | 2E-75   |
|                       |                 |                     |                          |                     | >gb AAR89617.1  40S ribosomal protein S5 [Capsicum annuum]                                                                                                                                                                                                                                                                                                    | 212   | 6E-75   |
|                       |                 |                     |                          |                     | >emb CAA06491.1  40S ribosomal protein S5 [Cicer arietinum]sp O65731 RS5 CICAR 40S ribosomal protein S5                                                                                                                                                                                                                                                       | 197   | 2E-74   |
|                       |                 |                     |                          |                     | >emb CAA70084.1  40S ribosomal protein S5 [Nicotiana glauca]sp O24111 RS5 NICPL 40S ribosomal protein S5                                                                                                                                                                                                                                                      | 154   | 3E-74   |
| CB380605              | 1.68E-02        | Mo17<B73=F1         | 1.35                     | 10                  | ns                                                                                                                                                                                                                                                                                                                                                            |       |         |
| DV489953              | 1.69E-02        | Mo17<B73=F1         | 1.38                     | 10                  | >ref NP_918334.1  B1110C07.25 [Oryza sativa (japonica cultivar-group)]dbj BAB90624.1  unknown protein [Oryza sativa (japonica cultivar-group)]                                                                                                                                                                                                                | 242   | 7E-50   |
|                       |                 |                     |                          |                     | dbj BAB89067.1  unknown protein [Oryza sativa (japonica cultivar-group)]                                                                                                                                                                                                                                                                                      | 187   | 4E-35   |
|                       |                 |                     |                          |                     | >emb CAB96663.1  putative protein [Arabidopsis thaliana]                                                                                                                                                                                                                                                                                                      |       |         |

**Table 4. Microarray analysis results, mode of gene action classification, and BLAST annotation for the 1,367 ESTs identified as differentially expressed among genotypes (15% FDR)**

| GenBank accession no. | Overall P value | Significant pattern | Fold change <sup>†</sup> | Sector <sup>‡</sup> | BLAST annotation*                                                                                                                                                                                                                                                                                                    | Score | E value |
|-----------------------|-----------------|---------------------|--------------------------|---------------------|----------------------------------------------------------------------------------------------------------------------------------------------------------------------------------------------------------------------------------------------------------------------------------------------------------------------|-------|---------|
| CB380918              | 1.69E-02        | F1<Mo17             | 1.38                     | 6                   | >ref NP_568247.1  unknown protein [Arabidopsis thaliana]gb AAM45002.1  unknown protein [Arabidopsis thaliana] gb AAK76546.1  unknown protein [Arabidopsis thaliana]                                                                                                                                                  | 209   | 4E-35   |
|                       |                 |                     |                          |                     | >gb AAM13375.1  putative protein [Arabidopsis thaliana]gb AAL32643.1  putative protein [Arabidopsis thaliana]                                                                                                                                                                                                        | 209   | 4E-35   |
|                       |                 |                     |                          |                     | >gb AAT69224.1  hypothetical protein At1g80200 [Arabidopsis thaliana]                                                                                                                                                                                                                                                | 235   | 4E-13   |
| CB380918              | 1.69E-02        | F1<Mo17             | 1.38                     | 6                   | >gb AAU44133.1  putative tRNA synthase [Oryza sativa (japonica cultivar-group)]                                                                                                                                                                                                                                      | 488   | 4E-39   |
|                       |                 |                     |                          |                     | >gb AAK73131.1  putative tRNA synthase [Oryza sativa]                                                                                                                                                                                                                                                                | 525   | 4E-39   |
|                       |                 |                     |                          |                     | >ref NP_196950.1  pseudouridylate synthase/ transporter [Arabidopsis thaliana]emb CAB87785.1  tRNA synthase-like protein [Arabidopsis thaliana]                                                                                                                                                                      | 540   | 4E-38   |
|                       |                 |                     |                          |                     | >gb AAO33771.1  putative tRNA pseudouridine synthase [Oryza sativa (indicacultivar-group)]                                                                                                                                                                                                                           | 458   | 6E-28   |
|                       |                 |                     |                          |                     | >ref ZP_00949860.1  putative tRNA pseudouridine synthase [Croceibacter atlanticusHTCC2559] gb EAP87999.1  putative tRNA pseudouridine synthase [Croceibacter atlanticus HTCC2559]                                                                                                                                    | 238   | 7E-17   |
| CAB29615              | 1.69E-02        | Mo17<B73=F1         | 1.32                     | 10                  | >ref XP_464199.1  putative ribosomal protein S14 [Oryza sativa (japonica cultivar-group)] ref XP_506724.1  PREDICTED OJ9003_G05.34 gene product [Oryza sativa (japonica cultivar-group)] dbj BAD25218.1  putative ribosomal protein S14 [Oryza sativa (japonica cultivar-group)]                                     | 150   | 7E-63   |
|                       |                 |                     |                          |                     | >ref XP_472410.1  OJ000126_13.9 [Oryza sativa (japonica cultivar-group)]emb CAE02065.2  OJ000126_13.9 [Oryza sativa (japonica cultivar-group)] dbj BAD29299.1  40S ribosomal protein S14 [Oryza sativa (japonica cultivar-group)] dbj BAD27798.1  40S ribosomal protein S14 [Oryza sativa (japonica cultivar-group)] | 151   | 8E-62   |
|                       |                 |                     |                          |                     | >sp P19950 RS141 MAIZE 40S ribosomal protein S14 (Clone MCH1)                                                                                                                                                                                                                                                        | 149   | 4E-61   |
|                       |                 |                     |                          |                     | >gb AAO41731.1  cytoplasmic ribosomal protein S14 [Brassica napus]                                                                                                                                                                                                                                                   | 150   | 3E-60   |
|                       |                 |                     |                          |                     | >gb ABC01912.1  ribosomal protein S14-like protein [Solanum tuberosum]gb ABB87124.1  hypothetical protein [Solanum tuberosum]                                                                                                                                                                                        | 150   | 1E-59   |
| CB351496              | 1.69E-02        | Mo17<B73            | 1.28                     | 10                  | ns                                                                                                                                                                                                                                                                                                                   |       |         |
| DV943102              | 1.70E-02        | B73=F1<Mo17         | 1.44                     | 5                   | ns                                                                                                                                                                                                                                                                                                                   |       |         |
| BM333894              | 1.70E-02        | Mo17<B73=F1         | 1.74                     | 10                  | >gb AAQ06290.1  hypothetical protein [Zea mays]                                                                                                                                                                                                                                                                      | 872   | 6E-23   |
|                       |                 |                     |                          |                     | >gb AAQ06288.1  hypothetical protein [Zea mays]                                                                                                                                                                                                                                                                      | 872   | 6E-23   |
|                       |                 |                     |                          |                     | >ref XP_469012.1  putative yabby protein [Oryza sativa (japonica cultivar-group)]gb AAC72848.1  unknown [Oryza sativa]                                                                                                                                                                                               | 186   | 2E-21   |
|                       |                 |                     |                          |                     | >gb AAX95527.1  Putative YABBY protein [Oryza sativa (japonica cultivar-group)]                                                                                                                                                                                                                                      | 154   | 8E-18   |
|                       |                 |                     |                          |                     | >gb ABA99903.1  YABBY protein [Oryza sativa (japonica cultivar-group)]                                                                                                                                                                                                                                               | 207   | 2E-12   |
| DV621943              | 1.71E-02        | B73<F1=Mo17         | 1.31                     | 3                   | >gb AAD20980.1  translation initiation factor 4A2 [Zea mays]                                                                                                                                                                                                                                                         | 215   | 1E-60   |
|                       |                 |                     |                          |                     | >gb AAB67607.1  translational initiation factor eIF-4A [Zea mays]                                                                                                                                                                                                                                                    | 414   | 4E-60   |
|                       |                 |                     |                          |                     | >emb CAA55742.1  unnamed protein product [Nicotiana tabacum]sp Q40467 IF414_TOBAC Eukaryotic initiation factor 4A-14 (ATP-dependent RNA helicase eIF4A-14) (eIF-4A-14)                                                                                                                                               | 413   | 5E-60   |
|                       |                 |                     |                          |                     | >gb AAB64289.1  translation initiation factor [Zea mays]                                                                                                                                                                                                                                                             | 414   | 7E-60   |
|                       |                 |                     |                          |                     | >ref XP_464146.1  putative translational initiation factor eIF-4A [Oryza sativa(japonica cultivar-group)] dbj BAD13081.1  putative translational initiation factor eIF-4A [Oryza sativa (japonica cultivar-group)]                                                                                                   | 414   | 9E-60   |
| DV495564              | 1.71E-02        | B73<F1              | 1.36                     | 1                   | >ref XP_550205.1  putative DNAJ domain-containing; methylation-controlled J protein[Oryza sativa (japonica cultivar-group)] dbj BAD61437.1  putative DNAJ domain-containing; methylation-controlled J protein [Oryza sativa (japonica cultivar-group)]                                                               | 112   | 4E-41   |
|                       |                 |                     |                          |                     | >ref NP_566352.1  heat shock protein binding / unfolded protein binding [Arabidopsisthaliana] gb AAM65828.1  DNAJ protein-like [Arabidopsis thaliana] gb AAF23300.1  unknown protein [Arabidopsis thaliana] gb AAO42952.1  At3g09700 [Arabidopsis thaliana] dbj BAC42440.1  unknown protein [Arabidopsis thaliana]   | 112   | 1E-39   |
|                       |                 |                     |                          |                     | >ref NP_565824.1  heat shock protein binding / unfolded protein binding [Arabidopsisthaliana] gb AAM15345.1  expressed protein [Arabidopsis thaliana] gb AAM15117.1  expressed protein [Arabidopsis thaliana] gb AAM61135.1  DNAJ protein-like [Arabidopsis thaliana]                                                | 112   | 1E-38   |
|                       |                 |                     |                          |                     | >ref NP_195923.1  heat shock protein binding / unfolded protein binding [Arabidopsisthaliana] emb CAB86070.1  DNAJ protein-like [Arabidopsis thaliana] gb AAM63105.1  DNAJ protein-like [Arabidopsis thaliana]                                                                                                       | 112   | 3E-37   |
|                       |                 |                     |                          |                     | >ref NP_909805.1  hypothetical protein [Oryza sativa (japonica cultivar-group)]gb AAN65026.1  hypothetical protein [Oryza sativa (japonica cultivar-group)]                                                                                                                                                          | 96    | 1E-31   |
|                       |                 |                     |                          |                     | >gb ABA97510.1  transposon protein, putative, CACTA, En/Spm sub-class [Oryza sativa(japonica cultivar-group)]                                                                                                                                                                                                        | 754   | 3E-58   |
|                       |                 |                     |                          |                     | >ref NP_919799.1  putative transposase [Oryza sativa (japonica cultivar-group)]gb AAL25182.1  Putative transposase [Oryza sativa] gb AAP52086.1  transposon protein, putative, CACTA, En/Spm sub-class [Oryza sativa (japonica cultivar-group)]                                                                      | 435   | 8E-56   |
| DV490292              | 1.72E-02        | B73<Mo17            | 3.03                     | 4                   | >ref NP_919670.1  putative transposase [Oryza sativa (japonica cultivar-group)]gb AAM08737.1  Putative transposase [Oryza sativa (japonica cultivar-group)] gb AAP51957.1  transposon protein, putative, CACTA, En/Spm sub-class [Oryza sativa (japonica cultivar-group)]                                            | 1003  | 6E-51   |
|                       |                 |                     |                          |                     | >ref XP_472829.1  OSJNBa0089K21.9 [Oryza sativa (japonica cultivar-group)]emb CAE03055.2  OSJNBa0089K21.9 [Oryza sativa (japonica cultivar-group)]                                                                                                                                                                   | 461   | 6E-50   |
|                       |                 |                     |                          |                     | >ref NP_921846.1  hypothetical protein [Oryza sativa (japonica cultivar-group)]gb AAM93719.1  hypothetical protein [Oryza sativa (japonica cultivar-group)] gb AAP54133.1  transposon protein, putative, CACTA, En/Spm sub-class [Oryza sativa (japonica cultivar-group)]                                            | 481   | 1E-49   |
|                       |                 |                     |                          |                     | >ref XP_463300.1  B1003B09.9 [Oryza sativa (japonica cultivar-group)]dbj BAB91954.1  unknown protein [Oryza sativa (japonica cultivar-group)]                                                                                                                                                                        |       |         |
|                       |                 |                     |                          |                     | >ref NP_921846.1  hypothetical protein [Oryza sativa (japonica cultivar-group)]gb AAM93719.1  hypothetical protein [Oryza sativa (japonica cultivar-group)]                                                                                                                                                          |       |         |
|                       |                 |                     |                          |                     | >ref NP_921846.1  hypothetical protein [Oryza sativa (japonica cultivar-group)]gb AAM93719.1  hypothetical protein [Oryza sativa (japonica cultivar-group)]                                                                                                                                                          |       |         |
|                       |                 |                     |                          |                     | >ref NP_921846.1  hypothetical protein [Oryza sativa (japonica cultivar-group)]gb AAM93719.1  hypothetical protein [Oryza sativa (japonica cultivar-group)]                                                                                                                                                          |       |         |
| DV490004              | 1.72E-02        | Mo17<B73=F1         | 1.42                     | 10                  | dbj BAB89166.1  unknown protein [Oryza sativa (japonica cultivar-group)]                                                                                                                                                                                                                                             | 336   | 6E-12   |

**Table 4. Microarray analysis results, mode of gene action classification, and BLAST annotation for the 1,367 ESTs identified as differentially expressed among genotypes (15% FDR)**

| GenBank accession no.                                                                                                                                              | Overall P value | Significant pattern | Fold change <sup>†</sup> | Sector <sup>‡</sup> | BLAST annotation*                                                                                                                                                                                                                                                                                                                                                                                                                                                                                                                                                | Score | E value |
|--------------------------------------------------------------------------------------------------------------------------------------------------------------------|-----------------|---------------------|--------------------------|---------------------|------------------------------------------------------------------------------------------------------------------------------------------------------------------------------------------------------------------------------------------------------------------------------------------------------------------------------------------------------------------------------------------------------------------------------------------------------------------------------------------------------------------------------------------------------------------|-------|---------|
| CB604241                                                                                                                                                           | 1.73E-02        | B73<F1              | 1.38                     | 2                   | >ref XP_470658.1  Putative ascorbate peroxidase [Oryza sativa (japonica cultivar-group)] gb AAP13093.1  ascorbate peroxidase [Oryza sativa (indica cultivar-group)] gb AAO17000.1  Putative ascorbate peroxidase [Oryza sativa (japonica cultivar-group)] sp P93404 APX1_ORYSA L-ascorbate peroxidase 1, cytosolic (APXa) dbj BAA08264.1  ascorbate peroxidase [Oryza sativa]                                                                                                                                                                                    | 250   | 2E-50   |
|                                                                                                                                                                    |                 |                     |                          |                     | >emb CAA06996.1  ascorbate peroxidase [Hordeum vulgare subsp. vulgare]                                                                                                                                                                                                                                                                                                                                                                                                                                                                                           | 250   | 1E-49   |
|                                                                                                                                                                    |                 |                     |                          |                     | >gb AAA99518.1  ascorbate peroxidase dbj BAA12890.1  cytosolic ascorbate peroxidase [Spinacia oleracea]                                                                                                                                                                                                                                                                                                                                                                                                                                                          | 250   | 2E-49   |
|                                                                                                                                                                    |                 |                     |                          |                     | >gb AAL08495.1  ascorbate peroxidase [Hordeum vulgare]                                                                                                                                                                                                                                                                                                                                                                                                                                                                                                           | 153   | 4E-49   |
|                                                                                                                                                                    |                 |                     |                          |                     | >emb CAA84406.1  cytosolic ascorbate peroxidase [Zea mays] prf 2111423A ascorbate peroxidase                                                                                                                                                                                                                                                                                                                                                                                                                                                                     | 250   | 1E-48   |
| DV494512                                                                                                                                                           | 1.73E-02        | B73<F1=Mo17         | 1.45                     | 2                   | >ref XP_493734.1  putative early nodulin [Oryza sativa (japonica cultivar-group)] dbj BAA83567.1  putative early nodulin [Oryza sativa (japonica cultivar-group)]                                                                                                                                                                                                                                                                                                                                                                                                | 116   | 2E-36   |
|                                                                                                                                                                    |                 |                     |                          |                     | >ref XP_493732.1  putative early nodulin [Oryza sativa (japonica cultivar-group)] dbj BAA83565.1  putative early nodulin [Oryza sativa (japonica cultivar-group)]                                                                                                                                                                                                                                                                                                                                                                                                | 115   | 2E-36   |
|                                                                                                                                                                    |                 |                     |                          |                     | dbj BAA33814.1  early nodulin [Oryza sativa (japonica cultivar-group)] dbj BAA33813.1  early nodulin [Oryza sativa (japonica cultivar-group)]                                                                                                                                                                                                                                                                                                                                                                                                                    | 116   | 4E-36   |
|                                                                                                                                                                    |                 |                     |                          |                     | >ref XP_493726.1  putative early nodulin [Oryza sativa (japonica cultivar-group)] dbj BAA83559.1  putative early nodulin [Oryza sativa (japonica cultivar-group)]                                                                                                                                                                                                                                                                                                                                                                                                | 115   | 7E-36   |
|                                                                                                                                                                    |                 |                     |                          |                     | >ref XP_493735.1  putative early nodulin [Oryza sativa (japonica cultivar-group)] dbj BAA83568.1  putative early nodulin [Oryza sativa (japonica cultivar-group)]                                                                                                                                                                                                                                                                                                                                                                                                | 115   | 9E-36   |
| DV491904                                                                                                                                                           | 1.73E-02        | B73<F1=Mo17         | 1.25                     | 2                   | ns                                                                                                                                                                                                                                                                                                                                                                                                                                                                                                                                                               |       |         |
| DV494463                                                                                                                                                           | 1.74E-02        | B73<F1              | 1.3                      | 1                   | >ref NP_913585.1  putative DKFZP56400463 protein [Oryza sativa (japonica cultivar-group)]                                                                                                                                                                                                                                                                                                                                                                                                                                                                        | 452   | e-100   |
|                                                                                                                                                                    |                 |                     |                          |                     | >gb AAN28840.1  At4g28450/F2009_130 [Arabidopsis thaliana] gb AAK73982.1  AT4g28450/F2009_130 [Arabidopsis thaliana] gb AAK50083.1  AT4g28450/F2009_130 [Arabidopsis thaliana]                                                                                                                                                                                                                                                                                                                                                                                   | 452   | 1E-79   |
|                                                                                                                                                                    |                 |                     |                          |                     | >ref NP_567810.2  nucleotide binding [Arabidopsis thaliana]                                                                                                                                                                                                                                                                                                                                                                                                                                                                                                      | 442   | 1E-79   |
|                                                                                                                                                                    |                 |                     |                          |                     | >gb AAL32701.1  SOF1 protein-like protein [Arabidopsis thaliana]                                                                                                                                                                                                                                                                                                                                                                                                                                                                                                 | 452   | 4E-79   |
|                                                                                                                                                                    |                 |                     |                          |                     | >emb CAB79647.1  SOF1 protein-like protein [Arabidopsis thaliana] emb CAA16884.1  SOF1 protein-like protein [Arabidopsis thaliana]                                                                                                                                                                                                                                                                                                                                                                                                                               | 283   | 4E-60   |
| DV621268                                                                                                                                                           | 1.74E-02        | Mo17<B73=F1         | 1.18                     | 10                  | >ref XP_468478.1  putative Vacuolar ATP synthase subunit F [Oryza sativa (japonica cultivar-group)] dbj BAD22867.1  putative Vacuolar ATP synthase subunit F [Oryza sativa (japonica cultivar-group)]                                                                                                                                                                                                                                                                                                                                                            | 130   | 7E-64   |
|                                                                                                                                                                    |                 |                     |                          |                     | >ref NP_192171.1  hydrogen-transporting ATP synthase, rotational mechanism/hydrogen-transporting ATPase, rotational mechanism [Arabidopsis thaliana]                                                                                                                                                                                                                                                                                                                                                                                                             |       |         |
|                                                                                                                                                                    |                 |                     |                          |                     | gb AAC78269.1  putative vacuolar ATPase [Arabidopsis thaliana] emb CAB80755.1  putative vacuolar ATPase [Arabidopsis thaliana] gb AAM51311.1  putative vacuolar ATPase [Arabidopsis thaliana] gb AAL38753.1  putative vacuolar ATPase [Arabidopsis thaliana] gb AAM60868.1  putative vacuolar ATPase [Arabidopsis thaliana] pir T01087 H+-exporting ATPase (EC 3.6.3.6) 14K chain, vacuolar - Arabidopsis thaliana sp Q9ZQX4 VATF_ARATH Probable vacuolar ATP synthase subunit F (V-ATPase F subunit) (Vacuolar proton pump F subunit) (V-ATPase 14 kDa subunit) | 128   | 1E-57   |
|                                                                                                                                                                    |                 |                     |                          |                     | >gb ABC60334.1  putative vacuolar ATP synthase subunit F [Musa acuminata]                                                                                                                                                                                                                                                                                                                                                                                                                                                                                        | 117   | 2E-52   |
|                                                                                                                                                                    |                 |                     |                          |                     | >ref XP_645434.1  hypothetical protein DDB0216933 [Dictyostelium discoideum] gb EAL71520.1  hypothetical protein DDB0216933 [Dictyostelium discoideum]                                                                                                                                                                                                                                                                                                                                                                                                           | 120   | 7E-32   |
| AI629785                                                                                                                                                           | 1.74E-02        | B73<Mo17            | 1.58                     | 3                   | >emb CAE57827.1  Hypothetical protein CBG00852 [Caenorhabditis briggsae]                                                                                                                                                                                                                                                                                                                                                                                                                                                                                         | 121   | 2E-31   |
| CB885290                                                                                                                                                           | 1.74E-02        | B73=F1<Mo17         | 1.42                     | 4                   | >dbj BAD68693.1  WD-40 repeat family protein-like [Oryza sativa (japonica cultivar-group)]                                                                                                                                                                                                                                                                                                                                                                                                                                                                       | 1377  | 2E-57   |
|                                                                                                                                                                    |                 |                     |                          |                     | >ref NP_917302.1  OSJNBb0006H05.17 [Oryza sativa (japonica cultivar-group)]                                                                                                                                                                                                                                                                                                                                                                                                                                                                                      | 1003  | 2E-57   |
|                                                                                                                                                                    |                 |                     |                          |                     | >gb AAZ31064.1  WD-40 repeat family protein [Medicago sativa]                                                                                                                                                                                                                                                                                                                                                                                                                                                                                                    | 417   | 4E-48   |
|                                                                                                                                                                    |                 |                     |                          |                     | >dbj BAB09653.1  unnamed protein product [Arabidopsis thaliana]                                                                                                                                                                                                                                                                                                                                                                                                                                                                                                  | 1003  | 2E-46   |
|                                                                                                                                                                    |                 |                     |                          |                     | >ref NP_197859.3  unknown protein [Arabidopsis thaliana]                                                                                                                                                                                                                                                                                                                                                                                                                                                                                                         | 1407  | 2E-46   |
| CB815849                                                                                                                                                           | 1.74E-02        | Mo17<B73=F1         | 1.27                     | 10                  | group)]                                                                                                                                                                                                                                                                                                                                                                                                                                                                                                                                                          | 754   | 1E-7    |
|                                                                                                                                                                    |                 |                     |                          |                     | >ref NP_922419.1  putative serine protease [Oryza sativa (japonica cultivar-group)] gb AAO00703.1  putative serine protease [Oryza sativa (japonica cultivar-group)] gb AAM12497.1  putative serine protease [Oryza sativa (japonica cultivar-group)] gb AAP54706.1  serine protease, putative [Oryza sativa (japonica cultivar-group)]                                                                                                                                                                                                                          | 759   | 2E-6    |
|                                                                                                                                                                    |                 |                     |                          |                     | >gb AAC03423.2  histone acetyltransferase HAT B [Zea mays] gb AAF06742.1  histone acetyltransferase HAT-B-p50 [Zea mays]                                                                                                                                                                                                                                                                                                                                                                                                                                         | 468   | 2E-63   |
|                                                                                                                                                                    |                 |                     |                          |                     | >gb AAM28228.1  histone acetyltransferase [Zea mays]                                                                                                                                                                                                                                                                                                                                                                                                                                                                                                             | 468   | 3E-63   |
|                                                                                                                                                                    |                 |                     |                          |                     | >dbj BAD28482.1  putative histone acetyltransferase HAT B [Oryza sativa (japonica cultivar-group)] dbj BAD28560.1  putative histone acetyltransferase HAT B [Oryza sativa (japonica cultivar-group)]                                                                                                                                                                                                                                                                                                                                                             | 466   | 7E-50   |
| >ref NP_200485.1  histone acetyltransferase [Arabidopsis thaliana] dbj BAB09892.1  histone acetyltransferase HAT B [Arabidopsis thaliana]                          | 467             | 2E-17               |                          |                     |                                                                                                                                                                                                                                                                                                                                                                                                                                                                                                                                                                  |       |         |
| >ref XP_468744.1  unknown protein [Oryza sativa (japonica cultivar-group)] gb AAP20836.1  hypothetical protein Os03g31010 [Oryza sativa (japonica cultivar-group)] | 548             | 3E-19               |                          |                     |                                                                                                                                                                                                                                                                                                                                                                                                                                                                                                                                                                  |       |         |
| CB381127                                                                                                                                                           | 1.75E-02        | B73=F1<Mo17         | 1.38                     | 4                   |                                                                                                                                                                                                                                                                                                                                                                                                                                                                                                                                                                  |       |         |
| CB250079                                                                                                                                                           | 1.75E-02        | Mo17<B73=F1         | 1.26                     | 10                  | >sp P40280 H2A MAIZE Histone H2A gb AAB04687.1  histone H2A                                                                                                                                                                                                                                                                                                                                                                                                                                                                                                      | 159   | 4E-14   |
|                                                                                                                                                                    |                 |                     |                          |                     | >ref NP_918596.1  putative histone H2A [Oryza sativa (japonica cultivar-group)] dbj BAB44136.1  putative histone H2A [Oryza sativa (japonica cultivar-group)]                                                                                                                                                                                                                                                                                                                                                                                                    | 159   | 2E-13   |
|                                                                                                                                                                    |                 |                     |                          |                     | >ref XP_475081.1  putative histone H2A [Oryza sativa (japonica cultivar-group)] gb AAS75248.1  putative histone H2A [Oryza sativa (japonica cultivar-group)]                                                                                                                                                                                                                                                                                                                                                                                                     | 173   | 6E-13   |
|                                                                                                                                                                    |                 |                     |                          |                     | >emb CAA37828.1  unnamed protein product [Petroselinum crispum] sp P19177 H2A PETCR Histone H2A                                                                                                                                                                                                                                                                                                                                                                                                                                                                  | 149   | 2E-12   |
|                                                                                                                                                                    |                 |                     |                          |                     | >sp P02276 H2A2 WHEAT Histone H2A.2.1                                                                                                                                                                                                                                                                                                                                                                                                                                                                                                                            | 151   | 4E-12   |
| CB240014                                                                                                                                                           | 1.76E-02        | Mo17<B73=F1         | 1.38                     | 11                  | >gb AAH67494.1  HIST1H3I protein [Homo sapiens]                                                                                                                                                                                                                                                                                                                                                                                                                                                                                                                  | 137   | 2E-51   |
|                                                                                                                                                                    |                 |                     |                          |                     | >sp P08860 H32 ORYSA Histone H3 gb AAA74190.1  histone H3 gb AAA33907.1  histone 3                                                                                                                                                                                                                                                                                                                                                                                                                                                                               | 136   | 4E-51   |

**Table 4. Microarray analysis results, mode of gene action classification, and BLAST annotation for the 1,367 ESTs identified as differentially expressed among genotypes (15% FDR)**

| GenBank accession no. | Overall P value | Significant pattern | Fold change <sup>†</sup> | Sector <sup>‡</sup> | BLAST annotation*                                                                                                                                                                                                                                                                                                                                                                                                                                                                                                                                                                                                                                                                                                                                                                                                                                                                                                                                                                                                                                                                                                                                                                                                                                                                                                                                                                                                                                                                                                          | Score | E value |
|-----------------------|-----------------|---------------------|--------------------------|---------------------|----------------------------------------------------------------------------------------------------------------------------------------------------------------------------------------------------------------------------------------------------------------------------------------------------------------------------------------------------------------------------------------------------------------------------------------------------------------------------------------------------------------------------------------------------------------------------------------------------------------------------------------------------------------------------------------------------------------------------------------------------------------------------------------------------------------------------------------------------------------------------------------------------------------------------------------------------------------------------------------------------------------------------------------------------------------------------------------------------------------------------------------------------------------------------------------------------------------------------------------------------------------------------------------------------------------------------------------------------------------------------------------------------------------------------------------------------------------------------------------------------------------------------|-------|---------|
|                       |                 |                     |                          |                     | >ref NP_910496.1  histone H3 [Oryza sativa (japonica cultivar-group)]ref NP_910502.1  histone H3 [Oryza sativa (japonica cultivar-group)] ref NP_910501.1  histone H3 [Oryza sativa (japonica cultivar-group)] ref NP_563838.1  DNA binding [Arabidopsis thaliana] ref NP_189372.1  DNA binding [Arabidopsis thaliana] ref NP_568227.1  DNA binding [Arabidopsis thaliana] ref NP_201339.1  DNA binding [Arabidopsis thaliana] ref NP_568228.1  DNA binding [Arabidopsis thaliana] ref XP_475315.1  putative histone H3 [Oryza sativa (japonica cultivar-group)] ref XP_472456.1  OSJNBb0108J11.17 [Oryza sativa (japonica cultivar-group)] ref NP_915639.1  putative histone H3 [Oryza sativa (japonica cultivar-group)] gb AAX92719.1  histone H3 - maize [Oryza sativa (japonica cultivar-group)] gb AAT07615.1  putative histone H3 [Oryza sativa (japonica cultivar-group)] emb CAA57811.1  Histone H3 [Asparagus officinalis] emb CAA31970.1  unnamed protein product [Oryza sativa] emb CAA31969.1  unnamed protein product [Oryza sativa] emb CAB89404.1  histone H3-like protein [Arabidopsis thaliana] >emb CAA31965.1  unnamed protein product [Medicago sativa]emb CAA31964.1  unnamed protein product [Medicago sativa] emb CAA25451.1  unnamed protein product [Triticum aestivum] sp P68428 H3_WHEAT Histone H3 gb AAB81995.1  histone H3 [Onobrychis viciifolia] sp P68427 H3_PEA Histone H3 sp P68430 H3_ONOVI Histone H3 sp P68429 H31_MEDSA Histone H3.1 (Major histone H3) gb AAB49545.1  histone H3.1 | 136   | 4E-51   |
|                       |                 |                     |                          |                     | >gb AAA32655.1  histone H3 (H3-1.1)                                                                                                                                                                                                                                                                                                                                                                                                                                                                                                                                                                                                                                                                                                                                                                                                                                                                                                                                                                                                                                                                                                                                                                                                                                                                                                                                                                                                                                                                                        | 136   | 4E-51   |
| CD058715              | 1.76E-02        | Mo17<B73=F1         | 1.17                     | 11                  | >dbj BAD45357.1  putative Noc3p [Oryza sativa (japonica cultivar-group)]                                                                                                                                                                                                                                                                                                                                                                                                                                                                                                                                                                                                                                                                                                                                                                                                                                                                                                                                                                                                                                                                                                                                                                                                                                                                                                                                                                                                                                                   | 846   | 6E-82   |
|                       |                 |                     |                          |                     | >ref NP_178036.1  unknown protein [Arabidopsis thaliana]                                                                                                                                                                                                                                                                                                                                                                                                                                                                                                                                                                                                                                                                                                                                                                                                                                                                                                                                                                                                                                                                                                                                                                                                                                                                                                                                                                                                                                                                   | 495   | 4E-60   |
|                       |                 |                     |                          |                     | >gb AAC17047.1  Similar to hypothetical protein YLR002c, gb Z7314 from S.cerevisiae. [Arabidopsis thaliana]                                                                                                                                                                                                                                                                                                                                                                                                                                                                                                                                                                                                                                                                                                                                                                                                                                                                                                                                                                                                                                                                                                                                                                                                                                                                                                                                                                                                                | 884   | 2E-54   |
|                       |                 |                     |                          |                     | >gb AAT68044.1  AD24 [Danio rerio]ref NP_001002863.1  nucleolar complex associated 3 homolog [Danio rerio] sp Q6DRN3 NOC3L_BRARE Nucleolar complex protein 3 homolog (NOC3 protein homolog) (NOC3-like protein) (Nucleolar complex-associated protein 3-like protein)                                                                                                                                                                                                                                                                                                                                                                                                                                                                                                                                                                                                                                                                                                                                                                                                                                                                                                                                                                                                                                                                                                                                                                                                                                                      | 800   | 2E-24   |
|                       |                 |                     |                          |                     | >ref XP_421670.1  PREDICTED: similar to chromosome 10 open reading frame 117; AD24protein [Gallus gallus]                                                                                                                                                                                                                                                                                                                                                                                                                                                                                                                                                                                                                                                                                                                                                                                                                                                                                                                                                                                                                                                                                                                                                                                                                                                                                                                                                                                                                  | 1256  | 2E-24   |
| BM349214              | 1.76E-02        | Mo17<B73=F1         | 2.62                     | 11                  | >dbj BAD61770.1  putative endo-beta-1,4-mannanase [Oryza sativa (japonica cultivar-group)]                                                                                                                                                                                                                                                                                                                                                                                                                                                                                                                                                                                                                                                                                                                                                                                                                                                                                                                                                                                                                                                                                                                                                                                                                                                                                                                                                                                                                                 | 440   | 1E-20   |
|                       |                 |                     |                          |                     | >ref NP_916078.1  putative (1-4)-beta-mannan endohydrolase [Oryza sativa (japonica cultivar-group)] dbj BAC05600.1  putative (1-4)-beta-mannan endohydrolase [Oryza sativa (japonica cultivar-group)] dbj BAB56016.1  putative (1-4)-beta-mannan endohydrolase [Oryza sativa (japonica cultivar-group)]                                                                                                                                                                                                                                                                                                                                                                                                                                                                                                                                                                                                                                                                                                                                                                                                                                                                                                                                                                                                                                                                                                                                                                                                                    | 445   | 8E-10   |
|                       |                 |                     |                          |                     | >ref NP_194561.1  hydrolase, hydrolyzing O-glycosyl compounds [Arabidopsis thaliana]emb CAB79634.1  putative (1-4)-beta-mannan endohydrolase [Arabidopsis thaliana]                                                                                                                                                                                                                                                                                                                                                                                                                                                                                                                                                                                                                                                                                                                                                                                                                                                                                                                                                                                                                                                                                                                                                                                                                                                                                                                                                        | 431   | 8E-8    |
|                       |                 |                     |                          |                     | >ref NP_179660.2  hydrolase, hydrolyzing O-glycosyl compounds [Arabidopsis thaliana]gb AAP40422.1  putative glycosyl hydrolase family 5 protein/cellulase ((1-4)-beta-mannan endohydrolase) [Arabidopsis thaliana]                                                                                                                                                                                                                                                                                                                                                                                                                                                                                                                                                                                                                                                                                                                                                                                                                                                                                                                                                                                                                                                                                                                                                                                                                                                                                                         | 433   | 3E-6    |
|                       |                 |                     |                          |                     | >gb AAD20927.1 (1-4)-beta-mannan endohydrolase [Arabidopsis thaliana]                                                                                                                                                                                                                                                                                                                                                                                                                                                                                                                                                                                                                                                                                                                                                                                                                                                                                                                                                                                                                                                                                                                                                                                                                                                                                                                                                                                                                                                      | 403   | 3E-6    |
| CD485021              | 1.76E-02        | Mo17<F1             | 1.22                     | 12                  | >gb AAM95942.1  nucleosome/chromatin assembly factor group D protein [Zea mays]emb CAA41220.1  high mobility group protein [Zea mays] emb CAB46752.1  HMGB protein [Zea mays] sp P27347 MNB1B MAIZE DNA-binding protein MNB1B (HMG1-like protein)                                                                                                                                                                                                                                                                                                                                                                                                                                                                                                                                                                                                                                                                                                                                                                                                                                                                                                                                                                                                                                                                                                                                                                                                                                                                          | 157   | 5E-14   |
|                       |                 |                     |                          |                     | >emb CAA46876.1  DNA-binding protein [Zea mays]pir T03640 high mobility group protein MNB1b - maize (fragment)                                                                                                                                                                                                                                                                                                                                                                                                                                                                                                                                                                                                                                                                                                                                                                                                                                                                                                                                                                                                                                                                                                                                                                                                                                                                                                                                                                                                             | 168   | 5E-14   |
|                       |                 |                     |                          |                     | >gb AAP21609.1  HMGB1 [Oryza sativa (indica cultivar-group)]gb AAN28722.1  HMGB1 protein [Oryza sativa (indica cultivar-group)] dbj BAD61823.1  HMGB1 [Oryza sativa (japonica cultivar-group)] gb AAC78104.1  high mobility group protein [Oryza sativa]                                                                                                                                                                                                                                                                                                                                                                                                                                                                                                                                                                                                                                                                                                                                                                                                                                                                                                                                                                                                                                                                                                                                                                                                                                                                   | 157   | 9E-13   |
|                       |                 |                     |                          |                     | >emb CAA77641.1  high mobility group protein [Triticum aestivum]sp P40621 HMGL_WHEAT HMGB1/2-like protein                                                                                                                                                                                                                                                                                                                                                                                                                                                                                                                                                                                                                                                                                                                                                                                                                                                                                                                                                                                                                                                                                                                                                                                                                                                                                                                                                                                                                  | 161   | 3E-12   |
|                       |                 |                     |                          |                     | >emb CAA90679.1  HMGB1/2-like protein [Hordeum vulgare subsp. vulgare]                                                                                                                                                                                                                                                                                                                                                                                                                                                                                                                                                                                                                                                                                                                                                                                                                                                                                                                                                                                                                                                                                                                                                                                                                                                                                                                                                                                                                                                     | 160   | 2E-11   |
| CB605333              | 1.76E-02        | Mo17<F1             | 1.3                      | 11                  | >gb AAL76334.1  putative G-box binding protein [Oryza sativa]dbj BAD45657.1  G-box binding protein-like [Oryza sativa (japonica cultivar-group)] gb AAB65433.1  HvB12D homolog [Oryza sativa]                                                                                                                                                                                                                                                                                                                                                                                                                                                                                                                                                                                                                                                                                                                                                                                                                                                                                                                                                                                                                                                                                                                                                                                                                                                                                                                              | 89    | 3E-34   |
|                       |                 |                     |                          |                     | >emb CAA70936.1  B12Dg1 [Hordeum vulgare subsp. vulgare]emb CAA54065.1  HvB12D [Hordeum vulgare subsp. vulgare]                                                                                                                                                                                                                                                                                                                                                                                                                                                                                                                                                                                                                                                                                                                                                                                                                                                                                                                                                                                                                                                                                                                                                                                                                                                                                                                                                                                                            | 87    | 5E-32   |
|                       |                 |                     |                          |                     | >gb AAD22104.1  B12D protein [Ipomoea batatas]                                                                                                                                                                                                                                                                                                                                                                                                                                                                                                                                                                                                                                                                                                                                                                                                                                                                                                                                                                                                                                                                                                                                                                                                                                                                                                                                                                                                                                                                             | 90    | 7E-28   |
|                       |                 |                     |                          |                     | >ref NP_190397.1  unknown protein [Arabidopsis thaliana]emb CAB51061.1  B12D-like protein [Arabidopsis thaliana] gb AAL91215.1  B12D-like protein [Arabidopsis thaliana] gb AAN65070.1  B12D-like protein [Arabidopsis thaliana] pir T13003 hypothetical protein T24C20.20 - Arabidopsis thaliana                                                                                                                                                                                                                                                                                                                                                                                                                                                                                                                                                                                                                                                                                                                                                                                                                                                                                                                                                                                                                                                                                                                                                                                                                          | 88    | 4E-25   |
|                       |                 |                     |                          |                     | >ref XP_477421.1  putative B12D protein [Oryza sativa (japonica cultivar-group)]dbj BAC84633.1  putative B12D protein [Oryza sativa (japonica cultivar-group)] dbj BAD31625.1  putative B12D protein [Oryza sativa (japonica cultivar-group)]                                                                                                                                                                                                                                                                                                                                                                                                                                                                                                                                                                                                                                                                                                                                                                                                                                                                                                                                                                                                                                                                                                                                                                                                                                                                              | 98    | 8E-24   |
| BM078217              | 1.76E-02        | Mo17<B73=F1         | 1.24                     | 11                  | >gb AAL76334.1  putative G-box binding protein [Oryza sativa]dbj BAD45657.1  G-box binding protein-like [Oryza sativa (japonica cultivar-group)] gb AAB65433.1  HvB12D homolog [Oryza sativa]                                                                                                                                                                                                                                                                                                                                                                                                                                                                                                                                                                                                                                                                                                                                                                                                                                                                                                                                                                                                                                                                                                                                                                                                                                                                                                                              | 89    | 2E-39   |
|                       |                 |                     |                          |                     | >emb CAA70936.1  B12Dg1 [Hordeum vulgare subsp. vulgare]emb CAA54065.1  HvB12D [Hordeum vulgare subsp. vulgare]                                                                                                                                                                                                                                                                                                                                                                                                                                                                                                                                                                                                                                                                                                                                                                                                                                                                                                                                                                                                                                                                                                                                                                                                                                                                                                                                                                                                            | 87    | 8E-38   |
|                       |                 |                     |                          |                     | >gb AAD22104.1  B12D protein [Ipomoea batatas]                                                                                                                                                                                                                                                                                                                                                                                                                                                                                                                                                                                                                                                                                                                                                                                                                                                                                                                                                                                                                                                                                                                                                                                                                                                                                                                                                                                                                                                                             | 90    | 8E-33   |
|                       |                 |                     |                          |                     | >ref NP_190397.1  unknown protein [Arabidopsis thaliana]emb CAB51061.1  B12D-like protein [Arabidopsis thaliana] gb AAL91215.1  B12D-like protein [Arabidopsis thaliana] gb AAN65070.1  B12D-like protein [Arabidopsis thaliana] pir T13003 hypothetical protein T24C20.20 - Arabidopsis thaliana                                                                                                                                                                                                                                                                                                                                                                                                                                                                                                                                                                                                                                                                                                                                                                                                                                                                                                                                                                                                                                                                                                                                                                                                                          | 88    | 8E-31   |
|                       |                 |                     |                          |                     | >ref XP_477421.1  putative B12D protein [Oryza sativa (japonica cultivar-group)]dbj BAC84633.1  putative B12D protein [Oryza sativa (japonica cultivar-group)] dbj BAD31625.1  putative B12D protein [Oryza sativa (japonica cultivar-group)]                                                                                                                                                                                                                                                                                                                                                                                                                                                                                                                                                                                                                                                                                                                                                                                                                                                                                                                                                                                                                                                                                                                                                                                                                                                                              | 98    | 3E-28   |
| DV492984              | 1.76E-02        | B73<F1=Mo17         | 1.37                     | 3                   | >emb CAA55022.1  beta tubulin [Oryza sativa (japonica cultivar-group)]                                                                                                                                                                                                                                                                                                                                                                                                                                                                                                                                                                                                                                                                                                                                                                                                                                                                                                                                                                                                                                                                                                                                                                                                                                                                                                                                                                                                                                                     | 447   | 2E-43   |
|                       |                 |                     |                          |                     | >emb CAE52516.1  beta tubulin [Setaria viridis]                                                                                                                                                                                                                                                                                                                                                                                                                                                                                                                                                                                                                                                                                                                                                                                                                                                                                                                                                                                                                                                                                                                                                                                                                                                                                                                                                                                                                                                                            | 448   | 2E-43   |
|                       |                 |                     |                          |                     | >ref NP_915874.1  tubulin beta chain [Oryza sativa (japonica cultivar-group)]dbj BAB92274.1  beta-tubulin [Oryza sativa (japonica cultivar-group)] dbj BAA06381.1  beta-tubulin [Oryza sativa (japonica cultivar-group)] sp P45960 TBB4_ORYSA Tubulin beta-4 chain (Beta-4 tubulin)                                                                                                                                                                                                                                                                                                                                                                                                                                                                                                                                                                                                                                                                                                                                                                                                                                                                                                                                                                                                                                                                                                                                                                                                                                        | 447   | 2E-43   |
|                       |                 |                     |                          |                     | >gb AAA66495.1  beta-tubulin                                                                                                                                                                                                                                                                                                                                                                                                                                                                                                                                                                                                                                                                                                                                                                                                                                                                                                                                                                                                                                                                                                                                                                                                                                                                                                                                                                                                                                                                                               | 447   | 2E-43   |
|                       |                 |                     |                          |                     | >sp Q41783 TBB6_MAIZE Tubulin beta-6 chain (Beta-6 tubulin)gb AAA20186.1  beta-6 tubulin                                                                                                                                                                                                                                                                                                                                                                                                                                                                                                                                                                                                                                                                                                                                                                                                                                                                                                                                                                                                                                                                                                                                                                                                                                                                                                                                                                                                                                   | 446   | 2E-43   |

**Table 4. Microarray analysis results, mode of gene action classification, and BLAST annotation for the 1,367 ESTs identified as differentially expressed among genotypes (15% FDR)**

| GenBank accession no. | Overall P value | Significant pattern | Fold change <sup>†</sup> | Sector <sup>‡</sup> | BLAST annotation*                                                                                                                                                                                                                                                                                                                                                                                                                                                                                                                                                                                                                                                                                                                         | Score | E value |
|-----------------------|-----------------|---------------------|--------------------------|---------------------|-------------------------------------------------------------------------------------------------------------------------------------------------------------------------------------------------------------------------------------------------------------------------------------------------------------------------------------------------------------------------------------------------------------------------------------------------------------------------------------------------------------------------------------------------------------------------------------------------------------------------------------------------------------------------------------------------------------------------------------------|-------|---------|
| DV551119              | 1.77E-02        | B73<F1=Mo17         | 1.32                     | 2                   | >dbj BAD38026.1  chloroplast thylakoidal processing peptidase-like protein [Oryzasativa (japonica cultivar-group)]                                                                                                                                                                                                                                                                                                                                                                                                                                                                                                                                                                                                                        | 411   | 2E-47   |
|                       |                 |                     |                          |                     | >ref XP_469892.1  putative chloroplast thylakoidal processing peptidase [Oryza sativa(japonica cultivar-group)] gb AAP50954.1  putative chloroplast thylakoidal processing peptidase [Oryza sativa (japonica cultivar-group)]                                                                                                                                                                                                                                                                                                                                                                                                                                                                                                             | 470   | 1E-21   |
|                       |                 |                     |                          |                     | >gb AAB63091.1  putative signal peptidase I [Arabidopsis thaliana]                                                                                                                                                                                                                                                                                                                                                                                                                                                                                                                                                                                                                                                                        | 250   | 5E-12   |
|                       |                 |                     |                          |                     | >ref NP_180603.2  peptidase/ serine-type peptidase [Arabidopsis thaliana]emb CAA71502.1  chloroplast thylakoidal processing peptidase [Arabidopsis thaliana] gb AAM91557.1  putative signal peptidase I [Arabidopsis thaliana] gb AAW80880.1  At2g30440 [Arabidopsis thaliana]                                                                                                                                                                                                                                                                                                                                                                                                                                                            | 340   | 5E-12   |
|                       |                 |                     |                          |                     | >ref NP_172171.1  peptidase/ serine-type peptidase [Arabidopsis thaliana]gb AAF63136.1  putative signal peptidase [Arabidopsis thaliana]                                                                                                                                                                                                                                                                                                                                                                                                                                                                                                                                                                                                  | 367   | 2E-11   |
| DV622303              | 1.77E-02        | B73<F1              | 1.37                     | 2                   | >dbj BAD28176.1  putative polysialic acid capsule expression protein [Oryza sativa(japonica cultivar-group)] dbj BAD28031.1  putative polysialic acid capsule expression protein [Oryza sativa (japonica cultivar-group)]                                                                                                                                                                                                                                                                                                                                                                                                                                                                                                                 | 344   | 1E-61   |
|                       |                 |                     |                          |                     | >ref NP_191029.1  sugar binding [Arabidopsis thaliana]emb CAB77589.1  sugar-phosphate isomerase-like protein [Arabidopsis thaliana]                                                                                                                                                                                                                                                                                                                                                                                                                                                                                                                                                                                                       | 350   | 3E-53   |
|                       |                 |                     |                          |                     | >emb CAF24506.1  putative Gut Q protein [Parachlamydia sp. UWE25]ref YF_008781.1  putative Gut Q protein [Candidatus Protochlamydia amoebophila UWE25]                                                                                                                                                                                                                                                                                                                                                                                                                                                                                                                                                                                    | 319   | 4E-20   |
|                       |                 |                     |                          |                     | >gb AAP98476.1  KpsF [Chlamydomophila pneumoniae TW-183]gb AAD18666.1  GutQ/KpsF Family Sugar-P Isomerase [Chlamydomophila pneumoniae CWL029] dbj BAA98732.1  GutQ/KpsF family sugar-P isomerase [Chlamydomophila pneumoniae J138] gb AAF38092.1  carbohydrate isomerase, KpsF/GutQ family [Chlamydomophila pneumoniae AR39] ref NP_876819.1  KpsF [Chlamydomophila pneumoniae TW-183] ref NP_300581.1  GutQ/KpsF family sugar-P isomerase [Chlamydomophila pneumoniae J138] ref NP_224722.1  GutQ/KpsF Family Sugar-P Isomerase [Chlamydomophila pneumoniae CWL029] ref NP_444777.1  carbohydrate isomerase, KpsF/GutQ family [Chlamydomophila pneumoniae AR39] sp Q9Z826 Y526 CHLPN Hypothetical protein CPh0526/CP0226/CPj0526/CpB0547 | 329   | 3E-19   |
|                       |                 |                     |                          |                     | >emb CAH63672.1  conserved hypothetical protein [Chlamydomophila abortus S26/3]ref YF_219643.1  hypothetical protein CAB215 [Chlamydomophila abortus S26/3]                                                                                                                                                                                                                                                                                                                                                                                                                                                                                                                                                                               | 329   | 1E-18   |
| CD485186              | 1.77E-02        | B73=Mo17<F1         | 1.22                     | 12                  | >emb CAA46876.1  DNA-binding protein [Zea mays]pir T03640 high mobility group protein MNB1b - maize (fragment)                                                                                                                                                                                                                                                                                                                                                                                                                                                                                                                                                                                                                            | 168   | 1E-22   |
|                       |                 |                     |                          |                     | >gb AAM95942.1  nucleosome/chromatin assembly factor group D protein [Zea mays]emb CAA41220.1  high mobility group protein [Zea mays] emb CAB46752.1  HMGA protein [Zea mays] sp P27347 MNB1B MAIZE DNA-binding protein MNB1B (HMG1-like protein)                                                                                                                                                                                                                                                                                                                                                                                                                                                                                         | 157   | 4E-22   |
|                       |                 |                     |                          |                     | >gb AAP21609.1  HMGB1 [Oryza sativa (indica cultivar-group)]gb AAN28722.1  HMG1 protein [Oryza sativa (indica cultivar-group)] dbj BAD61823.1  HMGB1 [Oryza sativa (japonica cultivar-group)] gb AAC78104.1  high mobility group protein [Oryza sativa]                                                                                                                                                                                                                                                                                                                                                                                                                                                                                   | 157   | 7E-21   |
|                       |                 |                     |                          |                     | >emb CAA77641.1  high mobility group protein [Triticum aestivum]sp P40621 HMGL WHEAT HMG1/2-like protein                                                                                                                                                                                                                                                                                                                                                                                                                                                                                                                                                                                                                                  | 161   | 3E-20   |
|                       |                 |                     |                          |                     | >emb CAA90679.1  HMG1/2-like protein [Hordeum vulgare subsp. vulgare]                                                                                                                                                                                                                                                                                                                                                                                                                                                                                                                                                                                                                                                                     | 160   | 2E-19   |
| CB815739              | 1.77E-02        | B73<Mo17            | 1.37                     | 4                   | >dbj BAD81083.1  putative COP9 signalosome complex subunit 2 [Oryza sativa (japonica cultivar-group)]                                                                                                                                                                                                                                                                                                                                                                                                                                                                                                                                                                                                                                     | 433   | 3E-85   |
|                       |                 |                     |                          |                     | >dbj BAD94682.1  putative PCI domain protein [Arabidopsis thaliana]                                                                                                                                                                                                                                                                                                                                                                                                                                                                                                                                                                                                                                                                       | 210   | 6E-67   |
|                       |                 |                     |                          |                     | >ref NP_565632.1  FUS12 (FUSCA 12) [Arabidopsis thaliana]gb AAC77857.2  COP9 complex subunit CSN2, putative [Arabidopsis thaliana] gb AAL58101.1  CSN complex subunit 2 [Arabidopsis thaliana] gb AAM65163.1  putative PCI domain protein [Arabidopsis thaliana] sp Q8W207 CSN2_ARATH COP9 signalosome complex subunit 2 (Signalosome subunit 2) (FUSCA protein 12) (FUSCA12)                                                                                                                                                                                                                                                                                                                                                             | 439   | 6E-67   |
|                       |                 |                     |                          |                     | >gb AAM91366.1  At2g26990/T20P8.4 [Arabidopsis thaliana]gb AAK91453.1  At2g26990/T20P8.4 [Arabidopsis thaliana]                                                                                                                                                                                                                                                                                                                                                                                                                                                                                                                                                                                                                           | 439   | 6E-67   |
|                       |                 |                     |                          |                     | >ref XP_780196.1  PREDICTED: similar to COP9 (constitutive photomorphogenic) homolog, subunit 2 isoform 1 [Strongylocentrotus purpuratus]                                                                                                                                                                                                                                                                                                                                                                                                                                                                                                                                                                                                 | 444   | 7E-60   |
| DV492318              | 1.78E-02        | B73<F1              | 1.51                     | 1                   | >ref XP_477795.1  26S proteasome regulatory particle non-ATPase subunit12 [Oryza sativa (japonica cultivar-group)] dbj BAB78490.1  26S proteasome regulatory particle non-ATPase subunit12 [Oryza sativa (japonica cultivar-group)]                                                                                                                                                                                                                                                                                                                                                                                                                                                                                                       | 267   | 2E-72   |
|                       |                 |                     |                          |                     | >ref NP_176633.1  peptidase [Arabidopsis thaliana]gb AAP86673.1  26S proteasome subunit RPN12 [Arabidopsis thaliana] gb AAN28827.1  At1g64520/F1N19_10 [Arabidopsis thaliana] gb AAK95251.1  At1g64520/F1N19_10 [Arabidopsis thaliana] gb AAK63961.1  At1g64520/F1N19_10 [Arabidopsis thaliana] gb AAF19671.1  F1N19.9 [Arabidopsis thaliana]                                                                                                                                                                                                                                                                                                                                                                                             | 267   | 5E-65   |
|                       |                 |                     |                          |                     | >gb AAP86674.1  26S proteasome subunit RPN12 [Arabidopsis thaliana]                                                                                                                                                                                                                                                                                                                                                                                                                                                                                                                                                                                                                                                                       | 267   | 2E-64   |
|                       |                 |                     |                          |                     | >ref NP_199019.1  peptidase [Arabidopsis thaliana]gb AAP83301.1  26S proteasome subunit RPN12b [Arabidopsis thaliana] dbj BAB08437.1  unnamed protein product [Arabidopsis thaliana]                                                                                                                                                                                                                                                                                                                                                                                                                                                                                                                                                      | 159   | 8E-62   |
|                       |                 |                     |                          |                     | >ref XP_625217.1  PREDICTED: similar to ENSANGP00000010608 [Apis mellifera]                                                                                                                                                                                                                                                                                                                                                                                                                                                                                                                                                                                                                                                               | 266   | 3E-28   |
| BM334686              | 1.78E-02        | B73<Mo17            | 1.45                     | 4                   | >gb AAC69757.1  endo-1,3;1,4-beta-D-glucanase [Zea mays]sp Q9ZT66 E134 MAIZE Endo-1,3;1,4-beta-D-glucanase precursor                                                                                                                                                                                                                                                                                                                                                                                                                                                                                                                                                                                                                      | 303   | 5E-26   |
|                       |                 |                     |                          |                     | >ref XP_480885.1  Endo-1,3;1,4-beta-D-glucanase precursor-like protein [Oryza sativa(japonica cultivar-group)] dbj BAD05244.1  Endo-1,3;1,4-beta-D-glucanase precursor-like protein [Oryza sativa (japonica cultivar-group)]                                                                                                                                                                                                                                                                                                                                                                                                                                                                                                              | 176   | 5E-12   |
|                       |                 |                     |                          |                     | >ref XP_480878.1  putative Endo-1,3;1,4-beta-D-glucanase precursor [Oryza sativa(japonica cultivar-group)] dbj BAD05237.1  putative Endo-1,3;1,4-beta-D-glucanase precursor [Oryza sativa (japonica cultivar-group)] dbj BAD05479.1  putative Endo-1,3;1,4-beta-D-glucanase precursor [Oryza sativa (japonica cultivar-group)]                                                                                                                                                                                                                                                                                                                                                                                                            | 265   | 5E-12   |
|                       |                 |                     |                          |                     | >gb AAX92844.1  Dienelactone hydrolase family, putative [Oryza sativa (japonica cultivar-group)] gb ABA92619.1  Dienelactone hydrolase family, putative [Oryza sativa (japonica cultivar-group)]                                                                                                                                                                                                                                                                                                                                                                                                                                                                                                                                          | 276   | 5E-12   |
|                       |                 |                     |                          |                     | >ref XP_507574.1  PREDICTED P0682A06.39 gene product [Oryza sativa (japonica cultivar-group)] ref XP_507174.1  PREDICTED P0682A06.39 gene product [Oryza sativa (japonica cultivar-group)]                                                                                                                                                                                                                                                                                                                                                                                                                                                                                                                                                | 272   | 5E-12   |

**Table 4. Microarray analysis results, mode of gene action classification, and BLAST annotation for the 1,367 ESTs identified as differentially expressed among genotypes (15% FDR)**

| GenBank accession no. | Overall P value | Significant pattern | Fold change <sup>†</sup> | Sector <sup>‡</sup> | BLAST annotation*                                                                                                                                                                                                                                                                                                                                                                                                                                                                                                                                                                                                                                                                                                                                                                                                                                                                                                                   | Score | E value |
|-----------------------|-----------------|---------------------|--------------------------|---------------------|-------------------------------------------------------------------------------------------------------------------------------------------------------------------------------------------------------------------------------------------------------------------------------------------------------------------------------------------------------------------------------------------------------------------------------------------------------------------------------------------------------------------------------------------------------------------------------------------------------------------------------------------------------------------------------------------------------------------------------------------------------------------------------------------------------------------------------------------------------------------------------------------------------------------------------------|-------|---------|
| CD485020              | 1.78E-02        | Mo17<B73=F1         | 1.33                     | 11                  | ns                                                                                                                                                                                                                                                                                                                                                                                                                                                                                                                                                                                                                                                                                                                                                                                                                                                                                                                                  |       |         |
| BM348600              | 1.78E-02        | F1<B73              | 3.87                     | 8                   | ns                                                                                                                                                                                                                                                                                                                                                                                                                                                                                                                                                                                                                                                                                                                                                                                                                                                                                                                                  |       |         |
| CD001635              | 1.80E-02        | B73<Mo17            | 1.38                     | 3                   | ns                                                                                                                                                                                                                                                                                                                                                                                                                                                                                                                                                                                                                                                                                                                                                                                                                                                                                                                                  |       |         |
| CB380900              | 1.80E-02        | Mo17<B73=F1         | 1.26                     | 11                  | >refNP_922264.1  unknown protein [Oryza sativa (japonica cultivar-group)]gb AAM94931.1  unknown protein [Oryza sativa (japonica cultivar-group)]<br>gb AAP54551.1  expressed protein [Oryza sativa (japonica cultivar-group)]                                                                                                                                                                                                                                                                                                                                                                                                                                                                                                                                                                                                                                                                                                       | 292   | 1E-6    |
| DV491332              | 1.80E-02        | F1=Mo17<B73         | 1.23                     | 8                   | >refNP_849649.1  pyridoxal phosphate binding [Arabidopsis thaliana]gb AAC17617.1  Similar to hypothetical protein F09E5.8 gb U37429 from C. elegans. ESTs<br>gb T42019 and gb N97000 come from this gene. [Arabidopsis thaliana]<br>>refNP_563897.1  pyridoxal phosphate binding [Arabidopsis thaliana]gb AAM51596.1  At1g11930/F12F1_20 [Arabidopsis thaliana] gb AAL16123.1 <br>At1g11930/F12F1_20 [Arabidopsis thaliana]<br>>gb AAK52989.1  AT4g26860/F10M23_200 [Arabidopsis thaliana]gb AAL47419.1  AT4g26860/F10M23_200 [Arabidopsis thaliana] gb AAM61322.1  putative<br>proline synthetase associated protein [Arabidopsis thaliana]<br>>refNP_567760.1  pyridoxal phosphate binding [Arabidopsis thaliana]<br>>emb CAD29783.1  putative proline synthetase associated protein [Oryza sativa]                                                                                                                               | 255   | 3E-70   |
| BM078604              | 1.80E-02        | Mo17<B73            | 1.32                     | 10                  | ns                                                                                                                                                                                                                                                                                                                                                                                                                                                                                                                                                                                                                                                                                                                                                                                                                                                                                                                                  |       |         |
| DV621760              | 1.80E-02        | Mo17<B73            | 1.24                     | 10                  | ns                                                                                                                                                                                                                                                                                                                                                                                                                                                                                                                                                                                                                                                                                                                                                                                                                                                                                                                                  |       |         |
| CB604598              | 1.81E-02        | Mo17<F1             | 1.34                     | 11                  | >ref XP_465219.1  putative fibroblast growth factor 2-interacting factor [Oryzasativa (japonica cultivar-group)] dbj BAD15974.1  putative fibroblast growth factor 2-<br>interacting factor [Oryza sativa (japonica cultivar-group)]<br>>refNP_565777.1  unknown protein [Arabidopsis thaliana]gb AAQ56832.1  At2g34040 [Arabidopsis thaliana] gb AAB67622.2  expressed protein [Arabidopsis<br>thaliana] gb AAM62452.1  unknown [Arabidopsis thaliana] gb AAN72062.1  expressed protein [Arabidopsis thaliana]<br>>gb AAF24538.2  F1K23.1 [Arabidopsis thaliana]<br>>refNP_174198.2  unknown protein [Arabidopsis thaliana]gb AAO64012.1  unknown protein [Arabidopsis thaliana] dbj BAC42863.1  unknown protein<br>[Arabidopsis thaliana]                                                                                                                                                                                         | 537   | 2E-23   |
| CB251915              | 1.81E-02        | B73<Mo17            | 1.54                     | 4                   | >refNP_915412.1  putative histone H2B [Oryza sativa (japonica cultivar-group)]dbj BAB93209.1  putative histone H2B [Oryza sativa (japonica cultivar-group)]<br>dbj BAB67889.1  putative histone H2B [Oryza sativa (japonica cultivar-group)]<br>>emb CAA42530.1  histone H2B [Triticum aestivum]sp P27807 H2B1 WHEAT Histone H2B<br>>emb CAA49585.1  H2B histone [Zea mays]sp P49120 H2B4 MAIZE Histone H2B.4<br>>emb CAA40564.1  H2B histone [Zea mays]sp P30755 H2B1 MAIZE Histone H2B.1<br>>ref XP_475367.1  putative histone H2B [Oryza sativa (japonica cultivar-group)]gb AAT39167.1  putative histone H2B [Oryza sativa (japonica cultivar-group)]<br>>dbj BAD98622.1  putative phosphoribosylaminoimidazole carboxylase, chloroplastprecursor [Oryza sativa (japonica cultivar-group)] dbj BAD73201.1  putative<br>phosphoribosylaminoimidazole carboxylase, chloroplast precursor [Oryza sativa (japonica cultivar-group)] | 139   | 5E-38   |
| CB605372              | 1.82E-02        | B73<F1=Mo17         | 1.22                     | 3                   | >gb AAR06291.1  phosphoribosylaminoimidazole carboxylase [Nicotiana tabacum]<br>>gb AAK14408.1  phosphoribosylaminoimidazole carboxylase [Nicotiana tabacum]<br>>dbj BAD85025.1  phosphoribosylaminoimidazole carboxylase, catalytic subunit[Thermococcus kodakarensis KOD1] ref YP_183249.1 <br>phosphoribosylaminoimidazole carboxylase catalytic subunit [Thermococcus kodakarensis KOD1]<br>>gb AAD35541.1  phosphoribosylaminoimidazole carboxylase, catalytic subunit[Thermotoga maritima MSB8] sp Q9WYS7 PUR6_THEMEA<br>Phosphoribosylaminoimidazole carboxylase catalytic subunit (AIR carboxylase) (AIRC) ref NP_228256.1  phosphoribosylaminoimidazole carboxylase catalytic<br>subunit [Thermotoga maritima MSB8]                                                                                                                                                                                                        | 631   | 6E-49   |
| CA829429              | 1.82E-02        | B73<F1=Mo17         | 1.36                     | 2                   | >emb CAA41024.1  acyl carrier protein [Zea mays]prf 1814481A acyl carrier protein<br>>sp P15543 ACP3 HORVU Acyl carrier protein 3, chloroplast precursor (Acyl carrier proteinIII) (ACP III) gb AAA32922.1  acyl carrier protein III<br>>ref XP_483668.1  putative acyl carrier protein III, chloroplast precursor (ACP III)[Oryza sativa (japonica cultivar-group)] dbj BAD08953.1  putative acyl carrier<br>protein III, chloroplast precursor (ACP III) [Oryza sativa (japonica cultivar-group)]<br>>gb AAA32924.1  acyl carrier protein III precursor<br>>sp P08817 ACP2_HORVU Acyl carrier protein 2, chloroplast precursor (Acyl carrier proteinII) (ACP II) gb AAA32921.1  acyl carrier protein II prf 1808324A acyl<br>carrier protein II                                                                                                                                                                                   | 121   | 3E-34   |
| DV621426              | 1.83E-02        | B73<F1=Mo17         | 1.2                      | 3                   | >emb CAB40376.1  adenosine kinase [Zea mays]<br>>gb AAO72629.1  adenosine kinase-like protein [Oryza sativa (japonicacultivar-group)]<br>>ref XP_506873.1  PREDICTED B1215B07.34 gene product [Oryza sativa (japonicacultivar-group)] ref XP_466836.1  putative adenosine kinase [Oryza sativa<br>(japonica cultivar-group)] dbj BAD23787.1  putative adenosine kinase [Oryza sativa (japonica cultivar-group)]<br>>dbj BAC02723.1  adenosine kinase [Oryza sativa]<br>>ref XP_473191.1  OSJNBa0073E02.13 [Oryza sativa (japonica cultivar-group)]emb CAE05453.3  OSJNBa0073E02.13 [Oryza sativa (japonica cultivar-group)]                                                                                                                                                                                                                                                                                                         | 331   | 1E-88   |
| CD651652              | 1.83E-02        | Mo17<B73=F1         | 1.47                     | 10                  | ns                                                                                                                                                                                                                                                                                                                                                                                                                                                                                                                                                                                                                                                                                                                                                                                                                                                                                                                                  |       |         |
| CD651168              | 1.83E-02        | Mo17<B73            | 1.26                     | 10                  | >ref XP_466081.1  copper chaperone homolog CCH [Oryza sativa (japonicacultivar-group)] dbj BAD25440.1  copper chaperone homolog CCH [Oryza sativa<br>(japonica cultivar-group)] gb AAF15285.1  copper chaperone homolog CCH [Oryza sativa]                                                                                                                                                                                                                                                                                                                                                                                                                                                                                                                                                                                                                                                                                          | 132   | 9E-27   |

**Table 4. Microarray analysis results, mode of gene action classification, and BLAST annotation for the 1,367 ESTs identified as differentially expressed among genotypes (15% FDR)**

| GenBank accession no. | Overall P value | Significant pattern | Fold change <sup>†</sup> | Sector <sup>‡</sup> | BLAST annotation*                                                                                                                                                                                                                                                                                                                                                              | Score | E value |
|-----------------------|-----------------|---------------------|--------------------------|---------------------|--------------------------------------------------------------------------------------------------------------------------------------------------------------------------------------------------------------------------------------------------------------------------------------------------------------------------------------------------------------------------------|-------|---------|
|                       |                 |                     |                          |                     | >dbj BAD73816.1  putative copper chaperone [Oryza sativa (japonica cultivar-group)]                                                                                                                                                                                                                                                                                            | 252   | 7E-26   |
|                       |                 |                     |                          |                     | >emb CAE51321.1  chopper chaperone [Hordeum vulgare subsp. vulgare]                                                                                                                                                                                                                                                                                                            | 112   | 5E-25   |
|                       |                 |                     |                          |                     | >ref NP_191183.1  CCH [Arabidopsis thaliana]emb CAB87423.1  copper homeostasis factor [Arabidopsis thaliana] gb AAK32872.1  AT3g56240/F18O21_200 [Arabidopsis thaliana] gb AAL47423.1  AT3g56240/F18O21_200 [Arabidopsis thaliana] gb AAM62878.1  copper homeostasis factor [Arabidopsis thaliana] gb AAC33510.1  copper homeostasis factor [Arabidopsis thaliana]             | 121   | 3E-24   |
|                       |                 |                     |                          |                     | >gb AAP06757.1  copper chaperone [Lycopersicon esculentum]                                                                                                                                                                                                                                                                                                                     | 81    | 5E-23   |
| CD527129              | 1.84E-02        | B73<F1=Mo17         | 1.29                     | 2                   | >emb CAC82203.1  S-adenosylmethionine synthetase [Oryza sativa (indicacultivar-group)]                                                                                                                                                                                                                                                                                         | 396   | 9E-65   |
|                       |                 |                     |                          |                     | >gb AAT94053.1  S-adenosylmethionine synthetase [Oryza sativa (japonicacultivar-group)] emb CAA81481.1  S-adenosyl methionine synthetase [Oryza sativa] sp P46611 METK ORYSA S-adenosylmethionine synthetase 1 (Methionine adenosyltransferase 1) (AdoMet synthetase 1)                                                                                                        | 396   | 9E-65   |
|                       |                 |                     |                          |                     | >gb ABB29942.1  S-adenosyl methionine synthase-like [Solanum tuberosum]                                                                                                                                                                                                                                                                                                        | 393   | 2E-61   |
|                       |                 |                     |                          |                     | >emb CAJ01705.1  putative AdoMet synthase 4 [Hordeum vulgare subsp. vulgare]                                                                                                                                                                                                                                                                                                   | 396   | 3E-61   |
|                       |                 |                     |                          |                     | >ref NP_908513.1  unnamed protein product [Oryza sativa (japonica cultivar-group)]dbj BAA96637.1  putative S-adenosyl-L-methionine synthetase [Oryza sativa (japonica cultivar-group)]                                                                                                                                                                                         | 396   | 6E-61   |
| DV490017              | 1.84E-02        | F1=Mo17<B73         | 1.45                     | 9                   | >gb AAU93534.1  unknown protein [Zea mays]                                                                                                                                                                                                                                                                                                                                     | 286   | 1E-25   |
|                       |                 |                     |                          |                     | >ref XP_469638.1  unknown protein [Oryza sativa (japonica cultivar-group)]gb AAR07080.1  unknown protein [Oryza sativa (japonica cultivar-group)] dbj BAC78576.1  hypothetical protein [Oryza sativa (japonica cultivar-group)] gb AAP03422.1  unknown protein [Oryza sativa (japonica cultivar-group)]                                                                        | 205   | 5E-22   |
|                       |                 |                     |                          |                     | >ref NP_196647.1  unknown protein [Arabidopsis thaliana]emb CAB96841.1  putative protein [Arabidopsis thaliana] gb AAK32857.1  AT5g10860/T30N20_130 [Arabidopsis thaliana] gb AAL47413.1  AT5g10860/T30N20_130 [Arabidopsis thaliana] sp Q9LEV3 UMP3 ARATH Protein At5g10860, mitochondrial precursor                                                                          | 206   | 2E-19   |
|                       |                 |                     |                          |                     | >gb AAT08729.1  CBS1 [Hyacinthus orientalis]                                                                                                                                                                                                                                                                                                                                   | 203   | 1E-18   |
|                       |                 |                     |                          |                     | >gb AAU04402.1  unknown [Citrus limon]                                                                                                                                                                                                                                                                                                                                         | 117   | 3E-15   |
| DV942650              | 1.84E-02        | B73<Mo17            | 1.35                     | 3                   | ns                                                                                                                                                                                                                                                                                                                                                                             |       |         |
| AI612441              | 1.84E-02        | F1<B73=Mo17         | 3.78                     | 6                   | ns                                                                                                                                                                                                                                                                                                                                                                             |       |         |
| CB331087              | 1.85E-02        | Mo17<B73=F1         | 1.33                     | 10                  | >ref XP_483837.1  glutaredoxin protein family-like [Oryza sativa (japonicacultivar-group)] dbj BAD10333.1  glutaredoxin protein family-like [Oryza sativa (japonica cultivar-group)] dbj BAC56010.1  glutaredoxin protein family-like [Oryza sativa (japonica cultivar-group)]                                                                                                 | 164   | 7E-14   |
|                       |                 |                     |                          |                     | >ref XP_483838.1  glutaredoxin protein family-like [Oryza sativa (japonicacultivar-group)] dbj BAD10332.1  glutaredoxin protein family-like [Oryza sativa (japonica cultivar-group)] dbj BAD12949.1  glutaredoxin protein family-like [Oryza sativa (japonica cultivar-group)]                                                                                                 | 152   | 1E-13   |
|                       |                 |                     |                          |                     | >ref NP_179617.1  arsenate reductase (glutaredoxin)/ electron transporter/thiol-disulfide exchange intermediate [Arabidopsis thaliana] gb AAM67430.1  At2g20270/F11A3.18 [Arabidopsis thaliana] gb AAM19817.1  At2g20270/F11A3.18 [Arabidopsis thaliana] gb AAD21761.1  putative glutaredoxin [Arabidopsis thaliana]                                                           | 179   | 5E-6    |
|                       |                 |                     |                          |                     | >gb AAM64584.1  putative glutaredoxin [Arabidopsis thaliana]                                                                                                                                                                                                                                                                                                                   | 179   | 5E-6    |
| DV491773              | 1.85E-02        | Mo17<B73            | 1.3                      | 10                  | >gb AAA33465.1  glyceraldehyde-3-phosphate dehydrogenase [Zea mays]                                                                                                                                                                                                                                                                                                            | 234   | 9E-81   |
|                       |                 |                     |                          |                     | >sp Q43247 G3PE MAIZE Glyceraldehyde-3-phosphate dehydrogenase, cytosolic 3gb AAA87579.1  cytosolic glyceraldehyde-3-phosphate dehydrogenase GAPC3                                                                                                                                                                                                                             | 337   | 9E-81   |
|                       |                 |                     |                          |                     | >gb AAA87580.1  cytosolic glyceraldehyde-3-phosphate dehydrogenase GAPC4                                                                                                                                                                                                                                                                                                       | 337   | 3E-80   |
|                       |                 |                     |                          |                     | >gb AAP83583.1  cytosolic glyceraldehyde-3-phosphate dehydrogenase [Triticumaestivum]                                                                                                                                                                                                                                                                                          | 168   | 1E-74   |
|                       |                 |                     |                          |                     | >sp P08477 G3PC_HORVU Glyceraldehyde-3-phosphate dehydrogenase, cytosolicgb AAA32956.1  glyceraldehyde-3-phosphate dehydrogenase prf 1301218A dehydrogenase.glyceraldehydphosphate                                                                                                                                                                                             | 305   | 2E-74   |
| CB604370              | 1.86E-02        | B73=F1<Mo17         | 1.43                     | 5                   | >ref XP_480155.1  putative snRNP core protein SMX5d [Oryza sativa (japonicacultivar-group)] dbj BAC99422.1  putative snRNP core protein SMX5d [Oryza sativa (japonica cultivar-group)]                                                                                                                                                                                         | 288   | 9E-45   |
|                       |                 |                     |                          |                     | >ref NP_563682.1  unknown protein [Arabidopsis thaliana]                                                                                                                                                                                                                                                                                                                       | 93    | 2E-42   |
|                       |                 |                     |                          |                     | >gb AAC72111.1  Similar to gb U85207 snRNP core Sm protein homolog Sm-X5 from Musmusculus. EST gb AA612141 comes from this gene. [Arabidopsis thaliana]                                                                                                                                                                                                                        | 114   | 7E-42   |
|                       |                 |                     |                          |                     | >gb AAM62994.1  snRNP core Sm protein Sm-X5-like protein [Arabidopsis thaliana]                                                                                                                                                                                                                                                                                                | 93    | 1E-41   |
|                       |                 |                     |                          |                     | >gb AAL48484.1  GM14851p [Drosophila melanogaster]ref NP_648570.1  CG10418-PA [Drosophila melanogaster] gb AAF49929.1  CG10418-PA [Drosophila melanogaster]                                                                                                                                                                                                                    | 95    | 1E-31   |
| BM335077              | 1.86E-02        | B73<F1=Mo17         | 4.67                     | 3                   | ns                                                                                                                                                                                                                                                                                                                                                                             |       |         |
| DV491502              | 1.86E-02        | B73=F1<Mo17         | 1.39                     | 5                   | >dbj BAD53258.1  breast carcinoma amplified sequence 3-like protein [Oryza sativa(japonica cultivar-group)]                                                                                                                                                                                                                                                                    | 756   | 9E-19   |
|                       |                 |                     |                          |                     | >ref NP_915725.1  P0415A04.11 [Oryza sativa (japonica cultivar-group)]                                                                                                                                                                                                                                                                                                         | 953   | 9E-19   |
| CD670425              | 1.86E-02        | Mo17<B73            | 1.28                     | 10                  | >sp Q08069 RS8 MAIZE 40S ribosomal protein S8gb AAB06330.1  ribosomal protein S8                                                                                                                                                                                                                                                                                               | 221   | 2E-83   |
|                       |                 |                     |                          |                     | >emb CAE05511.1  OSJNBa0038P21.4 [Oryza sativa (japonica cultivar-group)]                                                                                                                                                                                                                                                                                                      | 221   | 3E-77   |
|                       |                 |                     |                          |                     | >ref XP_465742.1  putative 40S ribosomal protein S8 [Oryza sativa (japonicacultivar-group)] ref XP_506804.1  PREDICTED P0483C08.42 gene product [Oryza sativa (japonica cultivar-group)] dbj BAD21871.1  putative 40S ribosomal protein S8 [Oryza sativa (japonica cultivar-group)] dbj BAD21876.1  putative 40S ribosomal protein S8 [Oryza sativa (japonica cultivar-group)] | 220   | 8E-77   |
|                       |                 |                     |                          |                     | >sp P49199 RS8 ORYSA 40S ribosomal protein S8dbj BAA07207.1  ribosomal protein S8 [Oryza sativa (japonica cultivar-group)]                                                                                                                                                                                                                                                     | 220   | 1E-73   |



**Table 4. Microarray analysis results, mode of gene action classification, and BLAST annotation for the 1,367 ESTs identified as differentially expressed among genotypes (15% FDR)**

| GenBank accession no. | Overall P value | Significant pattern | Fold change <sup>†</sup> | Sector <sup>‡</sup> | BLAST annotation*                                                                                                                                                                                                                                                                                                                                                                                                                                          | Score | E value |
|-----------------------|-----------------|---------------------|--------------------------|---------------------|------------------------------------------------------------------------------------------------------------------------------------------------------------------------------------------------------------------------------------------------------------------------------------------------------------------------------------------------------------------------------------------------------------------------------------------------------------|-------|---------|
| CD572992              | 1.86E-02        | B73<F1=Mo17         | 1.3                      | 3                   | >gb ABA46755.1  unknown [Solanum tuberosum]                                                                                                                                                                                                                                                                                                                                                                                                                | 224   | 9E-73   |
|                       |                 |                     |                          |                     | >gb AAW55593.1  minichromosome maintenance protein [Zea mays]                                                                                                                                                                                                                                                                                                                                                                                              | 831   | e-109   |
|                       |                 |                     |                          |                     | >gb AAT93993.1  putative minichromosome maintenance family protein [Oryza sativa(japonica cultivar-group)] gb AAT73631.1  putative minichromosome maintenance protein [Oryza sativa (japonica cultivar-group)]                                                                                                                                                                                                                                             | 830   | e-109   |
|                       |                 |                     |                          |                     | >ref NP_680393.1  ATP binding / DNA binding / DNA-dependent ATPase [Arabidopsisthaliana]                                                                                                                                                                                                                                                                                                                                                                   | 831   | e-103   |
|                       |                 |                     |                          |                     | >gb AAN73052.2  mini-chromosome maintenance protein MCM6 [Pisum sativum]                                                                                                                                                                                                                                                                                                                                                                                   | 827   | e-103   |
| CD527783              | 1.86E-02        | B73=F1<Mo17         | 1.39                     | 4                   | >emb CAA44607.1  ocs-binding factor 1 [Zea mays]sp P24068 OCS1 MAIZE Ocs-element binding factor 1 (OCSBF-1)                                                                                                                                                                                                                                                                                                                                                | 151   | 2E-54   |
|                       |                 |                     |                          |                     | >emb CAE92374.1  ocs-element binding factor 1 [Secale cereale]                                                                                                                                                                                                                                                                                                                                                                                             | 157   | 8E-44   |
|                       |                 |                     |                          |                     | >dbj BAE16260.1  bZIP protein [Oryza sativa (japonica cultivar-group)]gb ABA98933.1  ocs-element binding factor 1 [Oryza sativa (japonica cultivar-group)]                                                                                                                                                                                                                                                                                                 | 145   | 4E-43   |
|                       |                 |                     |                          |                     | >gb AAU10749.1  putative bZIP protein [Oryza sativa (japonica cultivar-group)]emb CAA40596.1  basic/leucine zipper protein [Oryza sativa (japonica cultivar-group)]                                                                                                                                                                                                                                                                                        | 148   | 8E-20   |
|                       |                 |                     |                          |                     | >emb CAC00657.1  common plant regulatory factor 6 [Petroselinum crispum]                                                                                                                                                                                                                                                                                                                                                                                   | 147   | 1E-19   |
| CAB29518              | 1.86E-02        | Mo17<B73=F1         | 1.35                     | 10                  | >emb CAB90214.1  putative elongation factor 1 beta [Hordeum vulgare subsp. vulgare]                                                                                                                                                                                                                                                                                                                                                                        | 226   | 6E-27   |
|                       |                 |                     |                          |                     | >gb AAR15081.1  translational elongation factor 1 subunit Bbeta [Pisum sativum]                                                                                                                                                                                                                                                                                                                                                                            | 231   | 9E-27   |
|                       |                 |                     |                          |                     | >ref XP_479153.1  elongation factor 1 beta [Oryza sativa (japonica cultivar-group)]ref XP_506463.1  PREDICTED P0616D06.117 gene product [Oryza sativa (japonica cultivar-group)] dbj BAC16499.1  elongation factor 1 beta [Oryza sativa (japonica cultivar-group)] dbj BAA04903.1  elongation factor 1 beta [Oryza sativa (japonica cultivar-group)] sp Q40680 EF1D ORYSA Elongation factor 1-delta (EF-1-delta) (Elongation factor 1B-beta) (eEF-1B beta) | 229   | 5E-26   |
|                       |                 |                     |                          |                     | >ref NP_910927.2  putative translation elongation factor eEF-1 beta' chain [Oryzasativa (japonica cultivar-group)] ref XP_506540.1  PREDICTED P0453E03.111 gene product [Oryza sativa (japonica cultivar-group)] dbj BAC22427.2  putative translation elongation factor eEF-1 beta' chain [Oryza sativa (japonica cultivar-group)]                                                                                                                         | 224   | 1E-25   |
|                       |                 |                     |                          |                     | >gb AAU89237.1  elongation factor 1 beta 2 [Oryza sativa (japonica cultivar-group)]dbj BAA34599.1  elongation factor 1 beta 2 [Oryza sativa (japonica cultivar-group)] dbj BAA34598.1  elongation factor 1 beta 2 [Oryza sativa (japonica cultivar-group)]                                                                                                                                                                                                 | 226   | 1E-25   |
| DV622429              | 1.87E-02        | B73<F1=Mo17         | 1.2                      | 2                   | >sp P00054 CYC SESIN Cytochrome c                                                                                                                                                                                                                                                                                                                                                                                                                          | 111   | 7E-14   |
|                       |                 |                     |                          |                     | >sp P00061 CYC SOLTU Cytochrome c                                                                                                                                                                                                                                                                                                                                                                                                                          | 111   | 7E-14   |
|                       |                 |                     |                          |                     | >sp P00060 CYC LYCES Cytochrome c                                                                                                                                                                                                                                                                                                                                                                                                                          | 111   | 7E-14   |
|                       |                 |                     |                          |                     | >pir CCZM cytochrome c - maize                                                                                                                                                                                                                                                                                                                                                                                                                             | 111   | 7E-14   |
|                       |                 |                     |                          |                     | >sp P00072 CYC FAGES Cytochrome c                                                                                                                                                                                                                                                                                                                                                                                                                          | 111   | 2E-13   |
| DV621252              | 1.87E-02        | B73<F1=Mo17         | 1.49                     | 3                   | >dbj BAD36064.1  unknown protein [Oryza sativa (japonica cultivar-group)]                                                                                                                                                                                                                                                                                                                                                                                  | 546   | 2E-43   |
|                       |                 |                     |                          |                     | >gb AAD28690.1  unknown protein [Arabidopsis thaliana]gb AAK43902.1  Unknown protein [Arabidopsis thaliana]                                                                                                                                                                                                                                                                                                                                                | 302   | 2E-31   |
|                       |                 |                     |                          |                     | >ref NP_178935.2  unknown protein [Arabidopsis thaliana]gb AAN72054.1  unknown protein [Arabidopsis thaliana]                                                                                                                                                                                                                                                                                                                                              | 541   | 2E-31   |
|                       |                 |                     |                          |                     | >ref XP_474087.1  OSJNBa0033G05.10 [Oryza sativa (japonica cultivar-group)]emb CAD41909.2  OSJNBa0033G05.10 [Oryza sativa (japonica cultivar-group)]                                                                                                                                                                                                                                                                                                       | 546   | 1E-28   |
|                       |                 |                     |                          |                     | >dbj BAC43452.1  unknown protein [Arabidopsis thaliana]                                                                                                                                                                                                                                                                                                                                                                                                    | 545   | 4E-26   |
| CB331032              | 1.88E-02        | Mo17<F1             | 1.27                     | 12                  | >gb AAT81723.1  striated muscle activator-like protein [Oryza sativa (japonica cultivar-group)]                                                                                                                                                                                                                                                                                                                                                            | 87    | 1E-33   |
|                       |                 |                     |                          |                     | >emb CAB80081.1  putative protein [Arabidopsis thaliana]emb CAA20577.1  putative protein [Arabidopsis thaliana]                                                                                                                                                                                                                                                                                                                                            | 161   | 8E-31   |
|                       |                 |                     |                          |                     | >ref NP_567930.1  unknown protein [Arabidopsis thaliana]gb AAM64660.1  unknown [Arabidopsis thaliana]                                                                                                                                                                                                                                                                                                                                                      | 95    | 1E-30   |
|                       |                 |                     |                          |                     | >gb AAH39801.1  3110003A17Rik protein [Mus musculus]                                                                                                                                                                                                                                                                                                                                                                                                       | 104   | 4E-27   |
|                       |                 |                     |                          |                     | >ref XP_125510.6  PREDICTED: hypothetical protein LOC73112 [Mus musculus]                                                                                                                                                                                                                                                                                                                                                                                  | 187   | 4E-27   |
| DV494239              | 1.88E-02        | Mo17<B73=F1         | 1.33                     | 11                  | >ref XP_464492.1  putative DNA-damage inducible protein [Oryza sativa (japonica cultivar-group)] dbj BAD25465.1  putative DNA-damage inducible protein [Oryza sativa (japonica cultivar-group)]                                                                                                                                                                                                                                                            | 415   | 7E-26   |
|                       |                 |                     |                          |                     | >dbj BAB02792.1  DNA-damage inducible protein DDI1-like [Arabidopsis thaliana]                                                                                                                                                                                                                                                                                                                                                                             | 395   | 6E-15   |
|                       |                 |                     |                          |                     | >ref NP_566451.1  aspartic-type endopeptidase [Arabidopsis thaliana]                                                                                                                                                                                                                                                                                                                                                                                       | 414   | 6E-15   |
|                       |                 |                     |                          |                     | >gb AAM61638.1  DNA-damage inducible protein DDI1-like [Arabidopsis thaliana]                                                                                                                                                                                                                                                                                                                                                                              | 414   | 3E-14   |
|                       |                 |                     |                          |                     | >gb AAM95942.1  nucleosome/chromatin assembly factor group D protein [Zea mays]emb CAA41220.1  high mobility group protein [Zea mays]                                                                                                                                                                                                                                                                                                                      | 157   | 1E-18   |
| CB885571              | 1.88E-02        | Mo17<F1             | 1.19                     | 11                  | emb CAB46752.1  HMGa protein [Zea mays] sp P27347 MNB1B MAIZE DNA-binding protein MNB1B (HMG1-like protein)                                                                                                                                                                                                                                                                                                                                                | 168   | 1E-18   |
|                       |                 |                     |                          |                     | >emb CAA46876.1  DNA-binding protein [Zea mays]pir T03640 high mobility group protein MNB1b - maize (fragment)                                                                                                                                                                                                                                                                                                                                             | 168   | 1E-18   |
|                       |                 |                     |                          |                     | >gb AAP21609.1  HMGB1 [Oryza sativa (indica cultivar-group)]gb AAN28722.1  HMG1 protein [Oryza sativa (indica cultivar-group)] dbj BAD61823.1  HMGB1 [Oryza sativa (japonica cultivar-group)] gb AAC78104.1  high mobility group protein [Oryza sativa]                                                                                                                                                                                                    | 157   | 3E-17   |
|                       |                 |                     |                          |                     | >emb CAA77641.1  high mobility group protein [Triticum aestivum]sp P40621 HMGL WHEAT HMG1/2-like protein                                                                                                                                                                                                                                                                                                                                                   | 161   | 1E-16   |
|                       |                 |                     |                          |                     | >emb CAA90679.1  HMG1/2-like protein [Hordeum vulgare subsp. vulgare]                                                                                                                                                                                                                                                                                                                                                                                      | 160   | 6E-16   |

**Table 4. Microarray analysis results, mode of gene action classification, and BLAST annotation for the 1,367 ESTs identified as differentially expressed among genotypes (15% FDR)**

| GenBank accession no. | Overall P value | Significant pattern | Fold change <sup>†</sup> | Sector <sup>‡</sup> | BLAST annotation*                                                                                                                                                                                                                                                                                                                                                                                                                                                               | Score | E value |
|-----------------------|-----------------|---------------------|--------------------------|---------------------|---------------------------------------------------------------------------------------------------------------------------------------------------------------------------------------------------------------------------------------------------------------------------------------------------------------------------------------------------------------------------------------------------------------------------------------------------------------------------------|-------|---------|
| CD670430              | 1.88E-02        | Mo17<F1             | 1.28                     | 11                  | >ref NP_910927.2  putative translation elongation factor eEF-1 beta' chain [Oryzasativa (japonica cultivar-group)] ref XP_506540.1  PREDICTED P0453E03.111 gene product [Oryza sativa (japonica cultivar-group)] dbj BAC22427.2  putative translation elongation factor eEF-1 beta' chain [Oryza sativa (japonica cultivar-group)]                                                                                                                                              | 224   | 9E-31   |
|                       |                 |                     |                          |                     | >dbj BAA02253.1  elongation factor 1 beta' [Oryza sativa (japonica cultivar-group)]sp P29545 EF1B_ORYSA Elongation factor 1-beta (EF-1-beta) (Elongation factor 1B-alpha 2) (eEF-1B alpha) (Elongation factor 1-beta') (EF-1-beta')                                                                                                                                                                                                                                             | 223   | 9E-31   |
|                       |                 |                     |                          |                     | >dbj BAA02436.1  elongation factor 1 beta' [Triticum aestivum]sp P29546 EF1B_WHEAT Elongation factor 1-beta (EF-1-beta) (Elongation factor 1B-alpha 2) (eEF-1B alpha) (Elongation factor 1-beta') (EF-1-beta')                                                                                                                                                                                                                                                                  | 216   | 1E-29   |
| DV490797              | 1.88E-02        | Mo17<B73            | 1.31                     | 9                   | >ref NP_568375.2  translation elongation factor [Arabidopsis thaliana]emb CAB64730.1  elongation factor 1B alpha-subunit [Arabidopsis thaliana] gb AAL07240.1  putative elongation factor 1B alpha-subunit [Arabidopsis thaliana] gb AAK26014.1  putative elongation factor 1B alpha-subunit [Arabidopsis thaliana] sp Q9SCX3 EF1B2 ARATH Elongation factor 1-beta 2 (EF-1-beta 2) (Elongation factor 1B-alpha 2) (eEF-1B alpha 2) (Elongation factor 1-beta' 2) (EF-1-beta' 2) | 224   | 1E-22   |
|                       |                 |                     |                          |                     | >ref NP_196772.1  translation elongation factor [Arabidopsis thaliana]emb CAB64729.1  elongation factor 1B alpha-subunit [Arabidopsis thaliana] dbj BAB10029.1  elongation factor 1B alpha-subunit [Arabidopsis thaliana] sp Q84WM9 EF1B1_ARATH Elongation factor 1-beta 1 (EF-1-beta 1) (Elongation factor 1B-alpha 1) (eEF-1B alpha 1) (Elongation factor 1-beta' 1) (EF-1-beta' 1)                                                                                           | 228   | 3E-20   |
|                       |                 |                     |                          |                     | >gb AAB64207.1  elongation factor 1-alpha [Zea mays]                                                                                                                                                                                                                                                                                                                                                                                                                            | 447   | 3E-76   |
| DV489893              | 1.88E-02        | F1=Mo17<B73         | 1.24                     | 9                   | >gb AAL79775.1  elongation factor 1 alpha [Saccharum hybrid cultivar CP72-2086]                                                                                                                                                                                                                                                                                                                                                                                                 | 441   | 7E-76   |
|                       |                 |                     |                          |                     | >gb AAL79774.1  elongation factor 1 alpha [Saccharum hybrid cultivar CP65-357]                                                                                                                                                                                                                                                                                                                                                                                                  | 447   | 7E-76   |
|                       |                 |                     |                          |                     | >dbj BAA08249.1  alpha subunit of translation elongation factor 1 [Zea mays]sp Q41803 EF1A MAIZE Elongation factor 1-alpha (EF-1-alpha)                                                                                                                                                                                                                                                                                                                                         | 447   | 1E-75   |
|                       |                 |                     |                          |                     | >dbj BAA23658.1  EF-1 alpha [Oryza sativa]                                                                                                                                                                                                                                                                                                                                                                                                                                      | 447   | 1E-75   |
| CD527474              | 1.89E-02        | B73<F1              | 1.17                     | 2                   | >ref XP_549834.1  putative tDET1 protein [Oryza sativa (japonica cultivar-group)]dbj BAD44839.1  putative tDET1 protein [Oryza sativa (japonica cultivar-group)]                                                                                                                                                                                                                                                                                                                | 511   | 5E-71   |
|                       |                 |                     |                          |                     | >ref NP_908360.1  putative tDET1 protein [Oryza sativa (japonica cultivar-group)]                                                                                                                                                                                                                                                                                                                                                                                               | 512   | 5E-71   |
|                       |                 |                     |                          |                     | >gb AAM18188.2  deetiolated 1-like protein [Solanum tuberosum]                                                                                                                                                                                                                                                                                                                                                                                                                  | 524   | 1E-55   |
|                       |                 |                     |                          |                     | >emb CAA11914.1  tDET1 protein [Lycopersicon esculentum]emb CAA10993.1  tDET1 protein [Lycopersicon esculentum] sp Q9ZNU6 DET1_LYCES Light-mediated development protein DET1 (Deetiolated1 homolog) (tDET1) (High pigmentation protein 2) (Protein dark green)                                                                                                                                                                                                                  | 523   | 1E-54   |
|                       |                 |                     |                          |                     | >gb AAW30032.1  At4g10180 [Arabidopsis thaliana]ref NP_192756.2  DET1 (DE-ETIOLATED 1) [Arabidopsis thaliana] gb AAU05471.1  At4g10180 [Arabidopsis thaliana]                                                                                                                                                                                                                                                                                                                   | 543   | 8E-48   |
| CD651577              | 1.90E-02        | B73<F1=Mo17         | 1.38                     | 3                   | >emb CAA69075.1  S-adenosylmethionine decarboxylase [Zea mays]sp O24575 DCAM_MAIZE S-adenosylmethionine decarboxylase proenzyme (AdoMetDC) (SamDC) [Contains: S-adenosylmethionine decarboxylase alpha chain; S-adenosylmethionine decarboxylase beta chain]                                                                                                                                                                                                                    | 400   | 1E-19   |
|                       |                 |                     |                          |                     | >ref XP_466676.1  S-adenosylmethionine decarboxylase 2 [Oryza sativa (japonica cultivar-group)] ref XP_506863.1  PREDICTED OJ1476_F05.33 gene product [Oryza sativa (japonica cultivar-group)] emb CAB64600.1  S-adenosylmethionine decarboxylase 2 [Oryza sativa] dbj BAD19677.1  S-adenosylmethionine decarboxylase 2 [Oryza sativa (japonica cultivar-group)] dbj BAD19232.1  S-adenosylmethionine decarboxylase 2 [Oryza sativa (japonica cultivar-group)]                  | 395   | 5E-17   |
|                       |                 |                     |                          |                     | >ref XP_473046.1  OSJNBa0067K08.23 [Oryza sativa (japonica cultivar-group)]emb CAA69074.2  S-adenosylmethionine decarboxylase [Oryza sativa (japonica cultivar-group)] emb CAD41242.2  OSJNBa0067K08.23 [Oryza sativa (japonica cultivar-group)] sp O24215 DCAM_ORYSA S-adenosylmethionine decarboxylase proenzyme (AdoMetDC) (SamDC) [Contains: S-adenosylmethionine decarboxylase alpha chain; S-adenosylmethionine decarboxylase beta chain]                                 | 398   | 1E-16   |
|                       |                 |                     |                          |                     | >emb CAD41510.3  OSJNBa0029H02.4 [Oryza sativa (japonica cultivar-group)]                                                                                                                                                                                                                                                                                                                                                                                                       | 450   | 1E-16   |
|                       |                 |                     |                          |                     | >emb CAB64671.1  S-adenosylmethionine decarboxylase 1 [Oryza sativa]                                                                                                                                                                                                                                                                                                                                                                                                            | 169   | 1E-16   |
| CD001332              | 1.90E-02        | Mo17<B73            | 1.27                     | 10                  | >gb AAL79775.1  elongation factor 1 alpha [Saccharum hybrid cultivar CP72-2086]                                                                                                                                                                                                                                                                                                                                                                                                 | 441   | 4E-47   |
|                       |                 |                     |                          |                     | >gb AAL79774.1  elongation factor 1 alpha [Saccharum hybrid cultivar CP65-357]                                                                                                                                                                                                                                                                                                                                                                                                  | 447   | 4E-47   |
|                       |                 |                     |                          |                     | >emb CAA06245.1  elongation factor 1-alpha (EF1-a) [Cicer arietinum]                                                                                                                                                                                                                                                                                                                                                                                                            | 326   | 5E-47   |
|                       |                 |                     |                          |                     | >emb CAA09041.1  elongation factor 1-alpha [Cicer arietinum]                                                                                                                                                                                                                                                                                                                                                                                                                    | 130   | 5E-47   |
|                       |                 |                     |                          |                     | >gb ABA12225.1  translation elongation factor 1A-9 [Gossypium hirsutum]                                                                                                                                                                                                                                                                                                                                                                                                         | 448   | 5E-47   |
| CD651688              | 1.90E-02        | Mo17<B73=F1         | 1.19                     | 10                  | ns                                                                                                                                                                                                                                                                                                                                                                                                                                                                              |       |         |
| BM073883              | 1.90E-02        | Mo17<B73=F1         | 1.41                     | 11                  | >emb CAA69256.1  60S acidic ribosomal protein P0 [Zea mays]sp O24573 RLA0 MAIZE 60S acidic ribosomal protein P0                                                                                                                                                                                                                                                                                                                                                                 | 319   | 3E-8    |
|                       |                 |                     |                          |                     | >ref XP_479932.1  60S acidic ribosomal protein P0-like [Oryza sativa (japonica cultivar-group)] dbj BAD09642.1  60S acidic ribosomal protein P0-like [Oryza sativa (japonica cultivar-group)]                                                                                                                                                                                                                                                                                   | 96    | 1E-6    |
|                       |                 |                     |                          |                     | >ref XP_479931.1  60S acidic ribosomal protein P0 [Oryza sativa (japonica cultivar-group)] dbj BAA04668.1  acidic ribosomal protein P0 [Oryza sativa (japonica cultivar-group)] dbj BAC66723.1  60S acidic ribosomal protein P0 [Oryza sativa (japonica cultivar-group)] sp P41095 RLA0_ORYSA 60S acidic ribosomal protein P0                                                                                                                                                   | 319   | 1E-6    |
|                       |                 |                     |                          |                     | >gb ABA91328.1  ribosomal protein L10, putative [Oryza sativa (japonica cultivar-group)]                                                                                                                                                                                                                                                                                                                                                                                        | 320   | 1E-6    |
|                       |                 |                     |                          |                     | >gb ABA95724.1  ribosomal protein L10, putative [Oryza sativa (japonica cultivar-group)]                                                                                                                                                                                                                                                                                                                                                                                        | 320   | 1E-6    |
| CD484475              | 1.90E-02        | Mo17<B73=F1         | 1.28                     | 10                  | >gb AAM95942.1  nucleosome/chromatin assembly factor group D protein [Zea mays]emb CAA41220.1  high mobility group protein [Zea mays] emb CAB46752.1  HMGa protein [Zea mays] sp P27347 MNB1B MAIZE DNA-binding protein MNB1B (HMG1-like protein)                                                                                                                                                                                                                               | 157   | 2E-17   |

**Table 4. Microarray analysis results, mode of gene action classification, and BLAST annotation for the 1,367 ESTs identified as differentially expressed among genotypes (15% FDR)**

| GenBank accession no. | Overall P value | Significant pattern | Fold change <sup>‡</sup> | Sector <sup>‡</sup> | BLAST annotation*                                                                                                                                                                                                                                                                                                                                                                                                                                                                                                                                                                                                   | Score | E value |
|-----------------------|-----------------|---------------------|--------------------------|---------------------|---------------------------------------------------------------------------------------------------------------------------------------------------------------------------------------------------------------------------------------------------------------------------------------------------------------------------------------------------------------------------------------------------------------------------------------------------------------------------------------------------------------------------------------------------------------------------------------------------------------------|-------|---------|
|                       |                 |                     |                          |                     | >emb CAA46876.1  DNA-binding protein [Zea mays]pir T03640 high mobility group protein MNB1b - maize (fragment)                                                                                                                                                                                                                                                                                                                                                                                                                                                                                                      | 168   | 2E-17   |
|                       |                 |                     |                          |                     | >gb AAP21609.1  HMGB1 [Oryza sativa (indica cultivar-group)]gb AAN28722.1  HMG1 protein [Oryza sativa (indica cultivar-group)] dbj BAD61823.1  HMGB1 [Oryza sativa (japonica cultivar-group)] gb AAC78104.1  high mobility group protein [Oryza sativa]                                                                                                                                                                                                                                                                                                                                                             | 157   | 3E-16   |
|                       |                 |                     |                          |                     | >emb CAA77641.1  high mobility group protein [Triticum aestivum]sp P40621 HMGL WHEAT HMG1/2-like protein                                                                                                                                                                                                                                                                                                                                                                                                                                                                                                            | 161   | 1E-15   |
|                       |                 |                     |                          |                     | >emb CAA90679.1  HMG1/2-like protein [Hordeum vulgare subsp. vulgare]                                                                                                                                                                                                                                                                                                                                                                                                                                                                                                                                               | 160   | 8E-15   |
| CB381011              | 1.90E-02        | B73<F1              | 1.31                     | 2                   | >ref NP_922034.1  putative transcription factor [Oryza sativa (japonica cultivar-group)] gb AAM91875.1  putative transcription factor [Oryza sativa (japonica cultivar-group)] gb AAP54321.1  transcription factor, putative [Oryza sativa (japonica cultivar-group)] gb ABB47797.1  transcription factor, putative [Oryza sativa (japonica cultivar-group)]                                                                                                                                                                                                                                                        | 164   | 7E-35   |
|                       |                 |                     |                          |                     | >gb AAO72645.1  putative transcription factor BTF3 [Oryza sativa (japonica cultivar-group)]                                                                                                                                                                                                                                                                                                                                                                                                                                                                                                                         | 175   | 1E-33   |
|                       |                 |                     |                          |                     | >ref XP_468566.1  Putative transcription factor [Oryza sativa (japonica cultivar-group)] gb AAN61483.1  Putative transcription factor [Oryza sativa (japonica cultivar-group)]                                                                                                                                                                                                                                                                                                                                                                                                                                      | 615   | 1E-33   |
|                       |                 |                     |                          |                     | >gb AAT67244.1  BTF3b-like transcription factor [Musa acuminata]                                                                                                                                                                                                                                                                                                                                                                                                                                                                                                                                                    | 157   | 2E-30   |
|                       |                 |                     |                          |                     | >ref NP_177466.1  unknown protein [Arabidopsis thaliana]gb AAL34243.1  putative RNA polymerase B transcription factor 3 [Arabidopsis thaliana]                                                                                                                                                                                                                                                                                                                                                                                                                                                                      |       |         |
|                       |                 |                     |                          |                     | gb AAK44068.1  putative RNA polymerase B transcription factor BTF3 [Arabidopsis thaliana] gb AAG52123.1  putative transcription factor BTF3 (RNA polymerase B transcription factor 3); 26343-27201 [Arabidopsis thaliana]                                                                                                                                                                                                                                                                                                                                                                                           | 165   | 2E-30   |
| DV549932              | 1.92E-02        | B73<F1=Mo17         | 1.57                     | 3                   | ns                                                                                                                                                                                                                                                                                                                                                                                                                                                                                                                                                                                                                  |       |         |
| CB381504              | 1.92E-02        | F1=Mo17<B73         | 1.42                     | 9                   | >gb AAK53813.1  Ran binding protein-1 [Lycopersicon esculentum]                                                                                                                                                                                                                                                                                                                                                                                                                                                                                                                                                     | 224   | 1E-51   |
|                       |                 |                     |                          |                     | >gb ABB97039.1  unknown [Brassica rapa]                                                                                                                                                                                                                                                                                                                                                                                                                                                                                                                                                                             | 225   | 7E-46   |
|                       |                 |                     |                          |                     | >ref NP_172194.1  SIRANBP; Ran GTPase binding [Arabidopsis thaliana]gb AAM19880.1  At1g07140/F10K1_27 [Arabidopsis thaliana] gb AAK95280.1  At1g07140/F10K1_27 [Arabidopsis thaliana] gb AAK43868.1  Unknown protein [Arabidopsis thaliana] gb AAF82206.1  Identical to atranbp1a from Arabidopsis thaliana gb X97377. It contains a RanBP1 domain PF00638. ESTs gb H76544, gb H76880, gb AA389814, gb AA712542, gb T88156, gb N65434 and gb AA712288 come from this gene gb AAN72204.1  Unknown protein [Arabidopsis thaliana] sp Q9LMK7 RBP1A_ARATH Ran-binding protein 1 homolog a (Ran-binding protein siRanBP) | 228   | 2E-45   |
|                       |                 |                     |                          |                     | >emb CAA66045.1  atranbp1a [Arabidopsis thaliana]                                                                                                                                                                                                                                                                                                                                                                                                                                                                                                                                                                   | 234   | 2E-45   |
|                       |                 |                     |                          |                     | >ref NP_200667.2  RANBP1 (RAN BINDING PROTEIN 1) [Arabidopsis thaliana]sp P92985 RBP1C_ARATH Ran-binding protein 1 homolog c gb AAB38776.1  Ran binding protein 1 homolog [Arabidopsis thaliana]                                                                                                                                                                                                                                                                                                                                                                                                                    | 219   | 3E-45   |
| DV493926              | 1.92E-02        | B73<Mo17            | 1.52                     | 3                   | >ref XP_506364.1  PREDICTED P0580A11.104 gene product [Oryza sativa (japonica cultivar-group)] dbj BAD31171.1  putative DNA repair protein rhp16 [Oryza sativa (japonica cultivar-group)]                                                                                                                                                                                                                                                                                                                                                                                                                           | 569   | 5E-67   |
|                       |                 |                     |                          |                     | >ref XP_478364.1  putative DNA repair protein [Oryza sativa (japonica cultivar-group)]                                                                                                                                                                                                                                                                                                                                                                                                                                                                                                                              | 633   | 5E-67   |
|                       |                 |                     |                          |                     | >ref NP_172004.1  ATP binding / ATP-dependent helicase/ DNA binding / helicase/ nucleic acid binding / ubiquitin-protein ligase/ zinc ion binding [Arabidopsis thaliana]                                                                                                                                                                                                                                                                                                                                                                                                                                            | 833   | 5E-51   |
|                       |                 |                     |                          |                     | >ref NP_171767.1  ATP binding / ATP-dependent helicase/ DNA binding / helicase/nucleic acid binding [Arabidopsis thaliana]                                                                                                                                                                                                                                                                                                                                                                                                                                                                                          | 678   | 7E-43   |
|                       |                 |                     |                          |                     | >ref XP_625623.1  Swi2/Snf2 ATPase_Rad16 ortholog [Cryptosporidium parvum]gb EAK87701.1  Swi2/Snf2 ATPase_Rad16 ortholog [Cryptosporidium parvum]                                                                                                                                                                                                                                                                                                                                                                                                                                                                   | 1278  | 2E-38   |
|                       |                 |                     |                          |                     | >ref XP_475770.1  'unknown protein, contains IQ calmodulin-binding motif' [Oryza sativa (japonica cultivar-group)] gb AAT39213.1  'unknown protein, contains IQ calmodulin-binding motif' [Oryza sativa (japonica cultivar-group)]                                                                                                                                                                                                                                                                                                                                                                                  | 574   | 3E-6    |
| DV621825              | 1.92E-02        | B73<F1=Mo17         | 1.21                     | 3                   |                                                                                                                                                                                                                                                                                                                                                                                                                                                                                                                                                                                                                     |       |         |
| DV490220              | 1.93E-02        | B73<F1              | 6.93                     | 2                   | >dbj BAD29518.1  unknown protein [Oryza sativa (japonica cultivar-group)]dbj BAD27882.1  unknown protein [Oryza sativa (japonica cultivar-group)]                                                                                                                                                                                                                                                                                                                                                                                                                                                                   | 283   | 7E-16   |
|                       |                 |                     |                          |                     | >dbj BAD45839.1  unknown protein [Oryza sativa (japonica cultivar-group)]                                                                                                                                                                                                                                                                                                                                                                                                                                                                                                                                           | 263   | 6E-10   |
| CD527264              | 1.93E-02        | B73<Mo17            | 1.32                     | 4                   | >emb CAD23416.1  m31 [Zea mays]                                                                                                                                                                                                                                                                                                                                                                                                                                                                                                                                                                                     | 241   | 2E-39   |
|                       |                 |                     |                          |                     | >emb CAD23414.1  m24 [Zea mays]                                                                                                                                                                                                                                                                                                                                                                                                                                                                                                                                                                                     | 240   | 4E-38   |
|                       |                 |                     |                          |                     | >gb AAO45879.1  MADS7 [Lolium perenne]                                                                                                                                                                                                                                                                                                                                                                                                                                                                                                                                                                              | 241   | 8E-37   |
|                       |                 |                     |                          |                     | >gb AAS59832.1  MADS-box protein RMADS221 [Oryza sativa (japonica cultivar-group)]                                                                                                                                                                                                                                                                                                                                                                                                                                                                                                                                  | 238   | 1E-36   |
|                       |                 |                     |                          |                     | >gb AAS59823.1  MADS-box protein RMADS212 [Oryza sativa (japonica cultivar-group)]                                                                                                                                                                                                                                                                                                                                                                                                                                                                                                                                  | 240   | 1E-36   |
| BG842314              | 1.93E-02        | B73<F1=Mo17         | 1.47                     | 2                   | >gb AAD10528.1  proliferating cell nuclear antigen [Zea mays]                                                                                                                                                                                                                                                                                                                                                                                                                                                                                                                                                       | 263   | 2E-51   |
|                       |                 |                     |                          |                     | >emb CAA55669.1  proliferative cell nuclear antigen [Zea mays]sp Q43266 PCNA_MAIZE Proliferating cell nuclear antigen (PCNA) prf 2105195A Proliferating cell nuclear antigen                                                                                                                                                                                                                                                                                                                                                                                                                                        | 263   | 7E-51   |
|                       |                 |                     |                          |                     | >ref XP_468284.1  SPATULA-like [Oryza sativa (japonica cultivar-group)]emb CAA37979.1  proliferating cell nuclear antigen [Oryza sativa (japonica cultivar-group)] gb AAK98707.1  Proliferating cell nuclear antigen (PCNA) [Oryza sativa] dbj BAD19422.1  SPATULA-like [Oryza sativa (japonica cultivar-group)] sp P17070 PCNA_ORYSA Proliferating cell nuclear antigen (PCNA) (Cyclin)                                                                                                                                                                                                                            | 263   | 5E-47   |
|                       |                 |                     |                          |                     | >sp Q00268 PCNA1 DAUCA Proliferating cell nuclear antigen (PCNA) (Cyclin)                                                                                                                                                                                                                                                                                                                                                                                                                                                                                                                                           | 264   | 3E-43   |
|                       |                 |                     |                          |                     | >gb AAC27992.1  proliferating cell nuclear antigen [Nicotiana tabacum]sp O82797 PCNA_TOBAC Proliferating cell nuclear antigen (PCNA) gb AAC34126.1  proliferating cell nuclear antigen [Nicotiana tabacum] dbj BAA76349.1  proliferating cell nuclear antigen [Nicotiana tabacum]                                                                                                                                                                                                                                                                                                                                   | 264   | 4E-43   |
| CA829732              | 1.93E-02        | B73=F1<Mo17         | 1.85                     | 4                   | ns                                                                                                                                                                                                                                                                                                                                                                                                                                                                                                                                                                                                                  |       |         |

**Table 4. Microarray analysis results, mode of gene action classification, and BLAST annotation for the 1,367 ESTs identified as differentially expressed among genotypes (15% FDR)**

| GenBank accession no. | Overall P value | Significant pattern | Fold change <sup>†</sup> | Sector <sup>‡</sup> | BLAST annotation*                                                                                                                                                                                                                                                                                                                                                                                                                                                                                                                                                                                                             | Score | E value |
|-----------------------|-----------------|---------------------|--------------------------|---------------------|-------------------------------------------------------------------------------------------------------------------------------------------------------------------------------------------------------------------------------------------------------------------------------------------------------------------------------------------------------------------------------------------------------------------------------------------------------------------------------------------------------------------------------------------------------------------------------------------------------------------------------|-------|---------|
| CB605124              | 1.93E-02        | B73<Mo17            | 1.39                     | 3                   | >ref NP_910927.2  putative translation elongation factor eEF-1 beta' chain [Oryzasativa (japonica cultivar-group)] ref XP_506540.1  PREDICTED P0453E03.111 gene product [Oryza sativa (japonica cultivar-group)] dbj BAC22427.2  putative translation elongation factor eEF-1 beta' chain [Oryza sativa (japonica cultivar-group)]                                                                                                                                                                                                                                                                                            | 224   | 6E-40   |
|                       |                 |                     |                          |                     | >gb ABA81875.1  putative elongation factor 1B alpha-subunit0like [Solanumtuberosum] gb ABA40427.1  unknown [Solanum tuberosum]                                                                                                                                                                                                                                                                                                                                                                                                                                                                                                | 227   | 4E-39   |
|                       |                 |                     |                          |                     | >gb AAT40505.1  putative elongation factor [Solanum demissum]                                                                                                                                                                                                                                                                                                                                                                                                                                                                                                                                                                 | 227   | 5E-39   |
|                       |                 |                     |                          |                     | >gb ABA40463.1  elongation factor-like protein [Solanum tuberosum]                                                                                                                                                                                                                                                                                                                                                                                                                                                                                                                                                            | 227   | 1E-38   |
|                       |                 |                     |                          |                     | >ref NP_179402.1  translation elongation factor [Arabidopsis thaliana]gb AAD31355.1  putative elongation factor beta-1 [Arabidopsis thaliana] gb AAM15146.1  putative elongation factor beta-1 [Arabidopsis thaliana] gb AAM10130.1  putative elongation factor 1-beta [Arabidopsis thaliana] gb AAL38335.1  putative elongation factor 1-beta [Arabidopsis thaliana] sp Q9S120 EF1D2 ARATH Elongation factor 1-delta 2 (EF-1-delta 2) (Elongation factor 1B-beta 2) (eEF-1B beta 2)                                                                                                                                          | 231   | 5E-38   |
| DV622285              | 1.93E-02        | B73<F1=Mo17         | 1.25                     | 2                   | >ref XP_467100.1  putative enoyl-CoA hydratase [Oryza sativa (japonicacultivar-group)] dbj BAD25316.1  putative enoyl-CoA hydratase [Oryza sativa (japonica cultivar-group)]                                                                                                                                                                                                                                                                                                                                                                                                                                                  | 300   | 8E-64   |
|                       |                 |                     |                          |                     | >emb CAC39053.1  putative enoyl-CoA hydratase [Oryza sativa]                                                                                                                                                                                                                                                                                                                                                                                                                                                                                                                                                                  | 295   | 8E-64   |
|                       |                 |                     |                          |                     | >ref XP_467099.1  putative enoyl-CoA hydratase [Oryza sativa (japonicacultivar-group)] dbj BAD25315.1  putative enoyl-CoA hydratase [Oryza sativa (japonica cultivar-group)]                                                                                                                                                                                                                                                                                                                                                                                                                                                  | 269   | 4E-57   |
|                       |                 |                     |                          |                     | >gb AAM18495.1  enoyl-CoA hydratase [Arabidopsis lyrata subsp. petraea]                                                                                                                                                                                                                                                                                                                                                                                                                                                                                                                                                       | 229   | 1E-52   |
|                       |                 |                     |                          |                     | >emb CAB88078.1  hypothetical protein [Arabidopsis thaliana]                                                                                                                                                                                                                                                                                                                                                                                                                                                                                                                                                                  | 217   | 2E-51   |
| DV491553              | 1.94E-02        | B73<F1=Mo17         | 1.3                      | 3                   | >ref XP_550643.1  RNA-binding protein-like [Oryza sativa (japonica cultivar-group)]dbj BAD69059.1  RNA-binding protein-like [Oryza sativa (japonica cultivar-group)] dbj BAD69323.1  RNA-binding protein-like [Oryza sativa (japonica cultivar-group)]                                                                                                                                                                                                                                                                                                                                                                        | 300   | 1E-50   |
|                       |                 |                     |                          |                     | >dbj BAC42069.1  unknown protein [Arabidopsis thaliana]                                                                                                                                                                                                                                                                                                                                                                                                                                                                                                                                                                       | 287   | 1E-30   |
|                       |                 |                     |                          |                     | >dbj BAB01919.1  unnamed protein product [Arabidopsis thaliana]                                                                                                                                                                                                                                                                                                                                                                                                                                                                                                                                                               | 271   | 1E-26   |
|                       |                 |                     |                          |                     | >ref NP_187983.1  RNA binding / nucleic acid binding [Arabidopsis thaliana]                                                                                                                                                                                                                                                                                                                                                                                                                                                                                                                                                   | 296   | 4E-26   |
|                       |                 |                     |                          |                     | >gb AAO37215.1  hypothetical protein [Arabidopsis thaliana]                                                                                                                                                                                                                                                                                                                                                                                                                                                                                                                                                                   | 277   | 6E-15   |
| BM382056              | 1.94E-02        | Mo17<B73            | 1.29                     | 9                   | >dbj BAD11336.1  BRI1-KD interacting protein 108 [Oryza sativa (japonicacultivar-group)]                                                                                                                                                                                                                                                                                                                                                                                                                                                                                                                                      | 131   | 4E-39   |
|                       |                 |                     |                          |                     | >ref XP_479487.1  putative 60S ribosomal protein L22 [Oryza sativa (japonicacultivar-group)] dbj BAC84770.1  putative 60S ribosomal protein L22 [Oryza sativa (japonica cultivar-group)] dbj BAC83533.1  putative 60S ribosomal protein L22 [Oryza sativa (japonica cultivar-group)]                                                                                                                                                                                                                                                                                                                                          | 130   | 2E-38   |
|                       |                 |                     |                          |                     | >ref NP_974229.1  structural constituent of ribosome [Arabidopsis thaliana]ref NP_187207.1  structural constituent of ribosome [Arabidopsis thaliana] gb AAF26141.1  putative 60S ribosomal protein L22 [Arabidopsis thaliana] gb AAM20231.1  putative 60S ribosomal protein L22 [Arabidopsis thaliana] gb AAL38800.1  putative 60S ribosomal protein L22 [Arabidopsis thaliana] gb AAP21331.1  At3g05560 [Arabidopsis thaliana] gb AAM66123.1  60S ribosomal protein L22-2 [Arabidopsis thaliana] gb AAO00829.1  putative 60S ribosomal protein L22 [Arabidopsis thaliana] sp Q9M9W1 RL22B_ARATH 60S ribosomal protein L22-2 | 124   | 2E-35   |
|                       |                 |                     |                          |                     | >ref NP_198129.1  structural constituent of ribosome [Arabidopsis thaliana]gb AAK00363.1  putative 60S ribosomal protein L22 [Arabidopsis thaliana] gb AAG41440.1  putative 60S ribosomal protein L22 [Arabidopsis thaliana] gb AAM63138.1  60S ribosomal protein L22-like [Arabidopsis thaliana] gb AAG40072.1  T1G16 [Arabidopsis thaliana] gb AAO24531.1  At5g27770 [Arabidopsis thaliana] sp Q9FE58 RL22C ARATH 60S ribosomal protein L22-3                                                                                                                                                                               | 124   | 1E-34   |
|                       |                 |                     |                          |                     | >gb AAK95148.1  ribosomal protein L22 [Ctalarus punctatus]                                                                                                                                                                                                                                                                                                                                                                                                                                                                                                                                                                    | 128   | 3E-22   |
|                       |                 |                     |                          |                     | >ref NP_915772.1  putative translation initiation factor SUI1 [Oryza sativa (japonicacultivar-group)]                                                                                                                                                                                                                                                                                                                                                                                                                                                                                                                         | 119   | 7E-30   |
|                       |                 |                     |                          |                     | >ref XP_475493.1  putative protein translation factor Sui1 [Oryza sativa (japonicacultivar-group)] gb AAT44286.1  putative protein translation factor Sui1 [Oryza sativa (japonica cultivar-group)]                                                                                                                                                                                                                                                                                                                                                                                                                           | 115   | 9E-27   |
|                       |                 |                     |                          |                     | >dbj BAD53005.1  putative translation initiation factor [Oryza sativa (japonicacultivar-group)]                                                                                                                                                                                                                                                                                                                                                                                                                                                                                                                               | 115   | 8E-25   |
| BG840806              | 1.96E-02        | F1=Mo17<B73         | 1.29                     | 9                   | >sp P56330 SUI1 MAIZE Protein translation factor SUI1 homolog (GOS2 protein)gb AAB88615.1  translation initiation factor; GOS2 [Zea mays]                                                                                                                                                                                                                                                                                                                                                                                                                                                                                     | 115   | 2E-24   |
|                       |                 |                     |                          |                     | >gb AAM34279.1  translation initiation factor [Triticum aestivum]                                                                                                                                                                                                                                                                                                                                                                                                                                                                                                                                                             | 115   | 3E-24   |
|                       |                 |                     |                          |                     | >ref XP_468759.1  putative inosine-uridine preferring nucleoside hydrolase [Oryzasativa (japonica cultivar-group)] gb AAP20832.1  putative inosine-uridine preferring nucleoside hydrolase [Oryza sativa (japonica cultivar-group)]                                                                                                                                                                                                                                                                                                                                                                                           | 322   | e-101   |
|                       |                 |                     |                          |                     | >gb AAW34239.1  putative inosine-uridine preferring nucleoside hydrolase [Oryzasativa (japonica cultivar-group)] gb AAS07209.1  putative inosine-uridine preferring nucleoside hydrolase (with alternative splicing) [Oryza sativa (japonica cultivar-group)]                                                                                                                                                                                                                                                                                                                                                                 | 258   | e-101   |
|                       |                 |                     |                          |                     | >gb AAS07208.1  putative inosine-uridine preferring nucleoside hydrolase,3'-partial (with alternative splicing) [Oryza sativa (japonica cultivar-group)]                                                                                                                                                                                                                                                                                                                                                                                                                                                                      | 313   | e-101   |
| BM078226              | 1.96E-02        | Mo17<B73            | 1.27                     | 10                  | >ref NP_563745.1  hydrolase [Arabidopsis thaliana]gb AAP42733.1  At1g05620 [Arabidopsis thaliana] gb AAM65464.1  unknown [Arabidopsis thaliana] gb AAN72060.1  expressed protein [Arabidopsis thaliana]                                                                                                                                                                                                                                                                                                                                                                                                                       | 322   | 3E-86   |
|                       |                 |                     |                          |                     | >gb AAD30614.1  Hypothetical protein [Arabidopsis thaliana]                                                                                                                                                                                                                                                                                                                                                                                                                                                                                                                                                                   | 358   | 3E-83   |
|                       |                 |                     |                          |                     | ns                                                                                                                                                                                                                                                                                                                                                                                                                                                                                                                                                                                                                            |       |         |
| DV495612              | 1.96E-02        | B73=F1<Mo17         | 1.73                     | 4                   | ns                                                                                                                                                                                                                                                                                                                                                                                                                                                                                                                                                                                                                            |       |         |
| BM078226              | 1.96E-02        | Mo17<B73            | 1.27                     | 10                  | >emb CAA67225.1  ribosomal protein S21 [Zea mays]sp Q41852 RS21 MAIZE 40S ribosomal protein S21                                                                                                                                                                                                                                                                                                                                                                                                                                                                                                                               | 81    | 5E-38   |
|                       |                 |                     |                          |                     | >emb CAA70852.1  40S ribosomal subunit protein S21 [Zea mays]                                                                                                                                                                                                                                                                                                                                                                                                                                                                                                                                                                 | 81    | 8E-37   |
|                       |                 |                     |                          |                     | >dbj BAA02158.1  40S subunit ribosomal protein [Oryza sativa (japonicacultivar-group)] sp P35687 RS21 ORYSA 40S ribosomal protein S21                                                                                                                                                                                                                                                                                                                                                                                                                                                                                         | 82    | 2E-34   |

**Table 4. Microarray analysis results, mode of gene action classification, and BLAST annotation for the 1,367 ESTs identified as differentially expressed among genotypes (15% FDR)**

| GenBank accession no. | Overall P value | Significant pattern | Fold change <sup>†</sup> | Sector <sup>‡</sup> | BLAST annotation*                                                                                                                                                                                                                                                                                                                                                                                                                                                                                                | Score | E value |
|-----------------------|-----------------|---------------------|--------------------------|---------------------|------------------------------------------------------------------------------------------------------------------------------------------------------------------------------------------------------------------------------------------------------------------------------------------------------------------------------------------------------------------------------------------------------------------------------------------------------------------------------------------------------------------|-------|---------|
|                       |                 |                     |                          |                     | >ref XP_469197.1  40S subunit ribosomal protein [Oryza sativa (japonica cultivar-group)] gb AAP44638.1  40S subunit ribosomal protein [Oryza sativa (japonica cultivar-group)]                                                                                                                                                                                                                                                                                                                                   | 82    | 6E-34   |
| CB6Q3887              | 1.97E-02        | Mo17<B73=F1         | 1.34                     | 11                  | >gb AAU89141.1  40S ribosomal protein S21, putative [Oryza sativa (japonica cultivar-group)]                                                                                                                                                                                                                                                                                                                                                                                                                     | 119   | 9E-33   |
|                       |                 |                     |                          |                     | ns                                                                                                                                                                                                                                                                                                                                                                                                                                                                                                               |       |         |
| DV621296              | 1.97E-02        | B73<Mo17            | 1.31                     | 3                   | >ref XP_477630.1  unknown protein [Oryza sativa (japonica cultivar-group)] dbj BAC83661.1  ARP protein-like [Oryza sativa (japonica cultivar-group)]                                                                                                                                                                                                                                                                                                                                                             | 647   | 2E-6    |
| DV494012              | 1.97E-02        | B73<Mo17            | 1.41                     | 4                   | dbj BAD32097.1  ARP protein-like [Oryza sativa (japonica cultivar-group)]                                                                                                                                                                                                                                                                                                                                                                                                                                        | 94    | 3E-36   |
|                       |                 |                     |                          |                     | >gb AAC32132.1  ISP42-like protein [Picea mariana]                                                                                                                                                                                                                                                                                                                                                                                                                                                               | 345   | 7E-34   |
|                       |                 |                     |                          |                     | >dbj BAD81111.1  mitochondrial import receptor subunit tom40 -like [Oryza sativa(japonica cultivar-group)]                                                                                                                                                                                                                                                                                                                                                                                                       |       |         |
|                       |                 |                     |                          |                     | >ref NP_188634.1  TOM40; voltage-gated ion-selective channel [Arabidopsis thaliana] gb AAM51291.1  putative membrane import protein [Arabidopsis thaliana]                                                                                                                                                                                                                                                                                                                                                       |       |         |
|                       |                 |                     |                          |                     | gb AAK93602.1  putative membrane import protein [Arabidopsis thaliana] sp Q9LHE5 TOM40_ARATH Probable mitochondrial import receptor subunit TOM40 homolog (Translocase of outer membrane 40 kDa subunit homolog)                                                                                                                                                                                                                                                                                                 | 309   | 3E-31   |
|                       |                 |                     |                          |                     | >dbj BAB03165.1  membrane import protein-like [Arabidopsis thaliana]                                                                                                                                                                                                                                                                                                                                                                                                                                             | 290   | 3E-31   |
|                       |                 |                     |                          |                     | >ref NP_912979.1  unnamed protein product [Oryza sativa (japonica cultivar-group)]                                                                                                                                                                                                                                                                                                                                                                                                                               | 290   | 9E-31   |
| DV942377              | 1.97E-02        | B73<Mo17            | 2.82                     | 4                   | >gb AAM74226.1  centromeric histone h3-like protein [Zea mays]                                                                                                                                                                                                                                                                                                                                                                                                                                                   | 157   | 4E-14   |
|                       |                 |                     |                          |                     | >gb AAT77291.1  histone H3 [Oryza sativa (japonica cultivar-group)] gb AAR85315.1  centromeric histone 3 [Oryza sativa (japonica cultivar-group)]                                                                                                                                                                                                                                                                                                                                                                | 164   | 1E-10   |
|                       |                 |                     |                          |                     | >gb AAW40662.1  hypothetical protein CNA00540 [Cryptococcus neoformans var. neoformans JEC21] gb EAL23402.1  hypothetical protein CNBA0520 [Cryptococcus neoformans var. neoformans B-3501A] ref XP_566481.1  hypothetical protein CNA00540 [Cryptococcus neoformans var. neoformans JEC21]                                                                                                                                                                                                                      | 152   | 7E-8    |
|                       |                 |                     |                          |                     | >ref XP_710644.1  putative centromere-specific histone H3 [Candida albicans SC5314] gb EAK91396.1  potential centromere-specific histone H3 variant [Candida albicans SC5314]                                                                                                                                                                                                                                                                                                                                    | 211   | 9E-8    |
|                       |                 |                     |                          |                     | >ref XP_869677.1  PREDICTED: similar to H3 histone, family 3B [Bos taurus]                                                                                                                                                                                                                                                                                                                                                                                                                                       | 122   | 2E-7    |
| CB381478              | 1.97E-02        | Mo17<B73=F1         | 1.42                     | 11                  | >ref XP_477139.1  unknown protein [Oryza sativa (japonica cultivar-group)] dbj BAD31697.1  unknown protein [Oryza sativa (japonica cultivar-group)]                                                                                                                                                                                                                                                                                                                                                              | 356   | 1E-32   |
|                       |                 |                     |                          |                     | dbj BAC83224.1  unknown protein [Oryza sativa (japonica cultivar-group)]                                                                                                                                                                                                                                                                                                                                                                                                                                         |       |         |
|                       |                 |                     |                          |                     | >ref NP_197406.1  catalytic [Arabidopsis thaliana] gb AAN13173.1  unknown protein [Arabidopsis thaliana] gb AAL66994.1  unknown protein [Arabidopsis thaliana] emb CAC39243.1  hypothetical protein [Arabidopsis thaliana]                                                                                                                                                                                                                                                                                       | 361   | 3E-26   |
| CB815485              | 1.98E-02        | B73<Mo17            | 1.28                     | 3                   | >gb AAR15174.1  actin [Ricinus communis]                                                                                                                                                                                                                                                                                                                                                                                                                                                                         | 377   | 2E-89   |
|                       |                 |                     |                          |                     | >gb AAK84080.1  actin [Triticum monococcum]                                                                                                                                                                                                                                                                                                                                                                                                                                                                      | 190   | 2E-89   |
|                       |                 |                     |                          |                     | >gb AAU44177.1  putative actin [Oryza sativa (japonica cultivar-group)]                                                                                                                                                                                                                                                                                                                                                                                                                                          | 377   | 2E-89   |
|                       |                 |                     |                          |                     | >gb AAS68183.1  actin [Brassica napus var. napus]                                                                                                                                                                                                                                                                                                                                                                                                                                                                | 176   | 2E-89   |
|                       |                 |                     |                          |                     | >gb AAN40685.1  actin [Stevia rebaudiana]                                                                                                                                                                                                                                                                                                                                                                                                                                                                        | 377   | 2E-89   |
| BG841920              | 1.98E-02        | Mo17<B73=F1         | 1.21                     | 10                  | >ref NP_915931.1  proteasome subunit alpha type 3 [Oryza sativa (japonica cultivar-group)] dbj BAD68244.1  putative proteasome subunit alpha type 3 [Oryza sativa (japonica cultivar-group)] dbj BAD68202.1  putative proteasome subunit alpha type 3 [Oryza sativa (japonica cultivar-group)] sp Q9LSU0 PSA3_ORYSA Proteasome subunit alpha type 3 (20S proteasome alpha subunit G) (20S proteasome subunit alpha-7) dbj BAA96833.1  alpha 7 subunit of 20S proteasome [Oryza sativa (japonica cultivar-group)] | 249   | 2E-85   |
|                       |                 |                     |                          |                     | >ref XP_475461.1  putative proteasome subunit alpha type 3 [Oryza sativa (japonica cultivar-group)] gb AAT69640.1  putative proteasome subunit alpha type 3 [Oryza sativa (japonica cultivar-group)]                                                                                                                                                                                                                                                                                                             | 249   | 2E-83   |
|                       |                 |                     |                          |                     | >emb CAC43323.1  putative alpha7 proteasome subunit [Nicotiana tabacum]                                                                                                                                                                                                                                                                                                                                                                                                                                          | 249   | 2E-80   |
|                       |                 |                     |                          |                     | >sp O24362 PSA3_SPIOL Proteasome subunit alpha type 3 (20S proteasome alpha subunit G)(20S proteasome subunit alpha-7) (Proteasome component C8)                                                                                                                                                                                                                                                                                                                                                                 |       |         |
|                       |                 |                     |                          |                     | dbj BAA21651.1  26S proteasome alpha subunit [Spinacia oleracea]                                                                                                                                                                                                                                                                                                                                                                                                                                                 | 249   | 1E-79   |
|                       |                 |                     |                          |                     | >ref NP_180270.1  PAG1; endopeptidase/ peptidase/ threonine endopeptidase [Arabidopsis thaliana] gb AAM70515.1  At2g27020/T20P8.7 [Arabidopsis thaliana]                                                                                                                                                                                                                                                                                                                                                         |       |         |
|                       |                 |                     |                          |                     | gb AAC77860.1  20S proteasome alpha subunit G (PAG1) [Arabidopsis thaliana] gb AAK53039.1  At2g27020/T20P8.7 [Arabidopsis thaliana] gb AAM66932.1  20S proteasome subunit C8 (PAG1/PRC8_ARATH) [Arabidopsis thaliana] sp O23715 PSA3_ARATH Proteasome subunit alpha type 3 (Proteasome subunit alpha type 7) (20S proteasome alpha subunit G-1) (Proteasome component 8) (DiDi 17A-2a) gb AAC32064.1  20S proteasome subunit PAG1 [Arabidopsis thaliana]                                                         | 249   | 6E-79   |
| CD058624              | 1.99E-02        | Mo17<B73            | 1.2                      | 10                  | >ref XP_475453.1  putative 60S ribosomal protein L24 [Oryza sativa (japonica cultivar-group)] gb AAT01333.1  putative 60S ribosomal protein L24 [Oryza sativa (japonica cultivar-group)]                                                                                                                                                                                                                                                                                                                         | 161   | 2E-20   |
|                       |                 |                     |                          |                     | >dbj BAD82702.1  putative 60S ribosomal protein L24 [Oryza sativa (japonica cultivar-group)]                                                                                                                                                                                                                                                                                                                                                                                                                     | 162   | 9E-20   |
|                       |                 |                     |                          |                     | >ref NP_911528.1  putative 60S ribosomal protein L24 [Oryza sativa (japonica cultivar-group)] dbj BAD30738.1  putative 60S ribosomal protein L24 [Oryza sativa (japonica cultivar-group)]                                                                                                                                                                                                                                                                                                                        | 160   | 9E-20   |
|                       |                 |                     |                          |                     | dbj BAC06922.1  putative 60S ribosomal protein L24 [Oryza sativa (japonica cultivar-group)]                                                                                                                                                                                                                                                                                                                                                                                                                      |       |         |
|                       |                 |                     |                          |                     | >emb CAA63960.1  L24 ribosomal protein [Hordeum vulgare subsp. vulgare] sp P50888 RL24 HORVU 60S ribosomal protein L24                                                                                                                                                                                                                                                                                                                                                                                           | 162   | 1E-19   |
|                       |                 |                     |                          |                     | >gb ABB72816.1  ribosomal protein L24-like protein [Solanum tuberosum]                                                                                                                                                                                                                                                                                                                                                                                                                                           | 171   | 2E-19   |
| CB334533              | 1.99E-02        | Mo17<B73=F1         | 1.17                     | 10                  | >ref XP_483755.1  putative 60S ribosomal protein L10a (RPL10aC) [Oryza sativa(japonica cultivar-group)] dbj BAD09090.1  putative 60S ribosomal protein L10a (RPL10aC) [Oryza sativa (japonica cultivar-group)]                                                                                                                                                                                                                                                                                                   | 216   | 2E-42   |
|                       |                 |                     |                          |                     | >gb AAW50982.1  ribosomal protein L10a [Triticum aestivum]                                                                                                                                                                                                                                                                                                                                                                                                                                                       | 216   | 1E-41   |
|                       |                 |                     |                          |                     | >dbj BAD28853.1  putative ribosomal protein L10a [Oryza sativa (japonica cultivar-group)]                                                                                                                                                                                                                                                                                                                                                                                                                        | 216   | 3E-40   |

**Table 4. Microarray analysis results, mode of gene action classification, and BLAST annotation for the 1,367 ESTs identified as differentially expressed among genotypes (15% FDR)**

| GenBank accession no.                                         | Overall P value | Significant pattern | Fold change <sup>†</sup> | Sector <sup>‡</sup> | BLAST annotation*                                                                                                                                                                                                                                                                                                                                                             | Score | E value |
|---------------------------------------------------------------|-----------------|---------------------|--------------------------|---------------------|-------------------------------------------------------------------------------------------------------------------------------------------------------------------------------------------------------------------------------------------------------------------------------------------------------------------------------------------------------------------------------|-------|---------|
| BM380625                                                      | 1.99E-02        | Mo17<B73            | 1.38                     | 10                  | >dbj BAD82631.1  putative 60S ribosomal protein L10A [Oryza sativa (japonica cultivar-group)] dbj BAB91757.1  putative 60S ribosomal protein L10A [Oryza sativa (japonica cultivar-group)]                                                                                                                                                                                    | 238   | 4E-40   |
|                                                               |                 |                     |                          |                     | >gb AAG17879.1  60S ribosomal protein L10A [Phaseolus coccineus]                                                                                                                                                                                                                                                                                                              | 88    | 1E-38   |
|                                                               |                 |                     |                          |                     | >gb AAV59302.1  unknown protein [Oryza sativa (japonica cultivar-group)]ref XP_475709.1  unknown protein [Oryza sativa (japonica cultivar-group)]                                                                                                                                                                                                                             |       |         |
|                                                               |                 |                     |                          |                     | gb AAU03101.1  putative proline iminopeptidase [Oryza sativa (japonica cultivar-group)]                                                                                                                                                                                                                                                                                       | 120   | 4E-56   |
|                                                               |                 |                     |                          |                     | >ref NP_179037.2  PIP; aminopeptidase/ catalytic/ hydrolase/ prolyl aminopeptidase[Arabidopsis thaliana] gb AAM48009.1  proline iminopeptidase [Arabidopsis thaliana] gb AAL24398.1  proline iminopeptidase [Arabidopsis thaliana]                                                                                                                                            | 380   | 5E-51   |
|                                                               |                 |                     |                          |                     | >gb AAL31244.1  At2g14260/T1O16.15 [Arabidopsis thaliana]gb AAK96488.1  At2g14260/T1O16.15 [Arabidopsis thaliana]                                                                                                                                                                                                                                                             | 329   | 5E-51   |
| DV491047                                                      | 2.00E-02        | B73<F1=Mo17         | 2.24                     | 2                   | >ref NP_973454.1  PIP; aminopeptidase/ catalytic/ hydrolase/ prolyl aminopeptidase[Arabidopsis thaliana] gb AAD20113.1  proline iminopeptidase [Arabidopsis thaliana] sp P93732 PIP ARATH Proline iminopeptidase (PIP) (Prolyl aminopeptidase) (PAP)                                                                                                                          | 329   | 5E-51   |
|                                                               |                 |                     |                          |                     | >gb AAC49560.1  proline iminopeptidase [Arabidopsis thaliana]                                                                                                                                                                                                                                                                                                                 | 329   | 2E-49   |
| CD001652                                                      | 2.00E-02        | B73=F1<Mo17         | 1.35                     | 4                   | >gb AAT42243.1  cell death-related protein [Oryza sativa (japonica cultivar-group)]gb AAW56895.1  cell death-related protein [Oryza sativa (japonica cultivar-group)]                                                                                                                                                                                                         | 128   | 2E-41   |
|                                                               |                 |                     |                          |                     | >gb AAP92158.1  apoptosis-related protein [Oryza sativa (indica cultivar-group)]                                                                                                                                                                                                                                                                                              | 128   | 1E-40   |
|                                                               |                 |                     |                          |                     | >ref NP_564336.1  double-stranded DNA binding [Arabidopsis thaliana]gb AAM20277.1  putative apoptosis-related protein 19 [Arabidopsis thaliana]                                                                                                                                                                                                                               |       |         |
|                                                               |                 |                     |                          |                     | gb AAK76518.1  unknown protein [Arabidopsis thaliana] gb AAL09776.1  At1g29850/FIN18_19 [Arabidopsis thaliana] gb AAG10611.1  Similar to apoptosis related protein 19 [Arabidopsis thaliana]                                                                                                                                                                                  | 129   | 9E-33   |
|                                                               |                 |                     |                          |                     | >ref NP_849728.1  double-stranded DNA binding [Arabidopsis thaliana]                                                                                                                                                                                                                                                                                                          | 130   | 1E-32   |
|                                                               |                 |                     |                          |                     | >gb AAM64794.1  unknown [Arabidopsis thaliana]                                                                                                                                                                                                                                                                                                                                | 129   | 2E-32   |
| DV622127                                                      | 2.00E-02        | Mo17<B73=F1         | 1.26                     | 10                  | >sp O24415 RLA2B MAIZE 60S acidic ribosomal protein P2Bgb AAB71080.1  acidic ribosomal protein P2b [Zea mays]                                                                                                                                                                                                                                                                 | 113   | 5E-20   |
|                                                               |                 |                     |                          |                     | >gb AAU44278.1  putative 60S acidic ribosomal protein [Oryza sativa (japonica cultivar-group)]                                                                                                                                                                                                                                                                                | 113   | 5E-14   |
|                                                               |                 |                     |                          |                     | >gb AAP80630.1  acidic ribosomal protein [Triticum aestivum]                                                                                                                                                                                                                                                                                                                  | 138   | 1E-13   |
|                                                               |                 |                     |                          |                     | >gb AAL91663.1  60s acidic ribosomal protein [Prunus dulcis]                                                                                                                                                                                                                                                                                                                  | 113   | 4E-13   |
|                                                               |                 |                     |                          |                     | >emb CAA55047.1  60s acidic ribosomal protein P2 [Parthenium argentatum]sp P41099 RLA2 PARAR 60S acidic ribosomal protein P2                                                                                                                                                                                                                                                  | 114   | 4E-12   |
|                                                               |                 |                     |                          |                     | ns                                                                                                                                                                                                                                                                                                                                                                            |       |         |
| DV491007                                                      | 2.01E-02        | B73=F1<Mo17         | 2.53                     | 4                   | ns                                                                                                                                                                                                                                                                                                                                                                            |       |         |
|                                                               |                 |                     |                          |                     |                                                                                                                                                                                                                                                                                                                                                                               |       |         |
| CD573554                                                      | 2.01E-02        | B73=F1<Mo17         | 1.23                     | 4                   | >dbj BAD81083.1  putative COP9 signalosome complex subunit 2 [Oryza sativa (japonica cultivar-group)]                                                                                                                                                                                                                                                                         | 433   | 8E-52   |
|                                                               |                 |                     |                          |                     | >ref NP_913011.1  unnamed protein product [Oryza sativa (japonica cultivar-group)]                                                                                                                                                                                                                                                                                            | 652   | 8E-52   |
|                                                               |                 |                     |                          |                     | >ref NP_565632.1  FUS12 (FUSCA 12) [Arabidopsis thaliana]gb AAC77857.2  COP9 complex subunit CSN2, putative [Arabidopsis thaliana] gb AAL58101.1  CSN complex subunit 2 [Arabidopsis thaliana] gb AAM65163.1  putative PCI domain protein [Arabidopsis thaliana] sp Q8W207 CSN2_ARATH COP9 signalosome complex subunit 2 (Signalosome subunit 2) (FUSCA protein 12) (FUSCA12) | 439   | 4E-49   |
|                                                               |                 |                     |                          |                     | >gb AAM91366.1  At2g26990/T20P8.4 [Arabidopsis thaliana]gb AAK91453.1  At2g26990/T20P8.4 [Arabidopsis thaliana]                                                                                                                                                                                                                                                               | 439   | 4E-49   |
|                                                               |                 |                     |                          |                     | >ref NP_001015820.1  MGC97656 protein [Xenopus tropicalis]gb AAH90102.1  MGC97656 protein [Xenopus tropicalis]                                                                                                                                                                                                                                                                | 443   | 4E-31   |
|                                                               |                 |                     |                          |                     | ns                                                                                                                                                                                                                                                                                                                                                                            |       |         |
| BG841554                                                      | 2.02E-02        | B73=Mo17<F1         | 2.44                     | 12                  | >gb AAK15504.1  unknown [Pennisetum ciliare]                                                                                                                                                                                                                                                                                                                                  | 130   | 6E-41   |
|                                                               |                 |                     |                          |                     | >dbj BAD45806.1  hypothetical protein [Oryza sativa (japonica cultivar-group)]                                                                                                                                                                                                                                                                                                | 270   | 2E-28   |
| CD568450                                                      | 2.02E-02        | Mo17<F1             | 1.36                     | 11                  | >ref NP_974342.1  TTN9 (TITAN9) [Arabidopsis thaliana]ref NP_188642.2  TTN9 (TITAN9) [Arabidopsis thaliana] gb AAM67548.1  unknown protein [Arabidopsis thaliana] gb AAL36085.1  unknown protein [Arabidopsis thaliana] dbj BAB01864.1  unnamed protein product [Arabidopsis thaliana]                                                                                        | 282   | 6E-11   |
|                                                               |                 |                     |                          |                     | >gb ABA96667.1  jacalin homolog [Oryza sativa (japonica cultivar-group)]                                                                                                                                                                                                                                                                                                      | 307   | 1E-6    |
|                                                               |                 |                     |                          |                     | >gb ABA96669.1  jakalin homolog [Oryza sativa (japonica cultivar-group)]                                                                                                                                                                                                                                                                                                      | 258   | 3E-6    |
| CB886497                                                      | 2.02E-02        | B73<F1=Mo17         | 1.16                     | 3                   | >gb ABA96823.1  jasmonate-induced protein homolog, putative [Oryza sativa (japonica cultivar-group)]                                                                                                                                                                                                                                                                          | 154   | 5E-6    |
|                                                               |                 |                     |                          |                     |                                                                                                                                                                                                                                                                                                                                                                               |       |         |
| DV550845                                                      | 2.02E-02        | B73<Mo17            | 1.35                     | 3                   | >gb AAT68209.1  putative histone H2B [Cynodon dactylon]                                                                                                                                                                                                                                                                                                                       | 98    | 2E-20   |
|                                                               |                 |                     |                          |                     | >ref XP_475912.1  putative histone H2B [Oryza sativa (japonica cultivar-group)]gb AAU44113.1  putative histone H2B [Oryza sativa (japonica cultivar-group)]                                                                                                                                                                                                                   |       |         |
|                                                               |                 |                     |                          |                     | gb AAT69583.1  putative histone H2B [Oryza sativa (japonica cultivar-group)]                                                                                                                                                                                                                                                                                                  | 152   | 2E-20   |
|                                                               |                 |                     |                          |                     | >ref NP_915412.1  putative histone H2B [Oryza sativa (japonica cultivar-group)]dbj BAB93209.1  putative histone H2B [Oryza sativa (japonica cultivar-group)]                                                                                                                                                                                                                  |       |         |
|                                                               |                 |                     |                          |                     | dbj BAB67889.1  putative histone H2B [Oryza sativa (japonica cultivar-group)]                                                                                                                                                                                                                                                                                                 | 139   | 2E-20   |
|                                                               |                 |                     |                          |                     | >ref NP_909298.1  putative histone H2B [Oryza sativa (japonica cultivar-group)]dbj BAB44055.1  putative histone H2B [Oryza sativa (japonica cultivar-group)]                                                                                                                                                                                                                  | 155   | 2E-20   |
|                                                               |                 |                     |                          |                     | >ref NP_909263.1  putative histone H2B [Oryza sativa (japonica cultivar-group)]dbj BAB44008.1  putative histone H2B [Oryza sativa (japonica cultivar-group)]                                                                                                                                                                                                                  | 153   | 2E-20   |
|                                                               |                 |                     |                          |                     | >ref XP_465992.1  putative elongation factor 2 [Oryza sativa (japonica cultivar-group)]dbj BAD26337.1  putative elongation factor 2 [Oryza sativa (japonica cultivar-group)]                                                                                                                                                                                                  | 843   | 1E-75   |
|                                                               |                 |                     |                          |                     | >ref XP_471058.1  OSJNBa0020P07.3 [Oryza sativa (japonica cultivar-group)]emb CAE01286.2  OSJNBa0020P07.3 [Oryza sativa (japonica cultivar-group)]                                                                                                                                                                                                                            | 843   | 1E-75   |
|                                                               |                 |                     |                          |                     | >gb AAP80650.1  elongation factor [Triticum aestivum]                                                                                                                                                                                                                                                                                                                         | 167   | 9E-75   |
| >gb AAF02837.1  elongation factor EF-2 [Arabidopsis thaliana] | 846             | 3E-72               |                          |                     |                                                                                                                                                                                                                                                                                                                                                                               |       |         |

**Table 4. Microarray analysis results, mode of gene action classification, and BLAST annotation for the 1,367 ESTs identified as differentially expressed among genotypes (15% FDR)**

| GenBank accession no.                                      | Overall P value | Significant pattern | Fold change <sup>†</sup> | Sector <sup>‡</sup> | BLAST annotation*                                                                                                                                                                                                                                                                                                                                                                                       | Score | E value |
|------------------------------------------------------------|-----------------|---------------------|--------------------------|---------------------|---------------------------------------------------------------------------------------------------------------------------------------------------------------------------------------------------------------------------------------------------------------------------------------------------------------------------------------------------------------------------------------------------------|-------|---------|
| CB329498                                                   | 2.02E-02        | Mo17<B73=F1         | 1.21                     | 10                  | >gb AAN31925.1  putative elongation factor [Arabidopsis thaliana]                                                                                                                                                                                                                                                                                                                                       | 665   | 3E-72   |
|                                                            |                 |                     |                          |                     | >ref XP_463967.1  putative small nuclear ribonucleoprotein polypeptide E [Oryzasetiva (japonica cultivar-group)] dbj BAD08019.1  putative small nuclear ribonucleoprotein polypeptide E [Oryza sativa (japonica cultivar-group)]                                                                                                                                                                        | 88    | 2E-40   |
|                                                            |                 |                     |                          |                     | >ref NP_179464.1  unknown protein [Arabidopsis thaliana]gb AAD08943.1  putative small nuclear ribonucleoprotein E [Arabidopsis thaliana] gb AAM64436.1  putative small nuclear ribonucleoprotein E [Arabidopsis thaliana] gb AAO64082.1  putative small nuclear ribonucleoprotein E [Arabidopsis thaliana]                                                                                              | 88    | 4E-39   |
|                                                            |                 |                     |                          |                     | dbj BAC43399.1  putative small nuclear ribonucleoprotein E [Arabidopsis thaliana]                                                                                                                                                                                                                                                                                                                       |       |         |
|                                                            |                 |                     |                          |                     | >ref NP_567844.1  unknown protein [Arabidopsis thaliana]gb AAM65292.1  small nuclear ribonucleoprotein homolog [Arabidopsis thaliana] dbj BAD44551.1  small nuclear ribonucleoprotein homolog [Arabidopsis thaliana] dbj BAD43076.1  small nuclear ribonucleoprotein homolog [Arabidopsis thaliana]                                                                                                     | 88    | 2E-38   |
|                                                            |                 |                     |                          |                     | dbj BAD42875.1  small nuclear ribonucleoprotein homolog [Arabidopsis thaliana]                                                                                                                                                                                                                                                                                                                          | 86    | 4E-37   |
|                                                            |                 |                     |                          |                     | >emb CAB81026.1  small nuclear ribonucleoprotein homolog [Arabidopsis thaliana]                                                                                                                                                                                                                                                                                                                         | 88    | 2E-28   |
|                                                            |                 |                     |                          |                     | >gb EAA07131.2  ENSANGP00000022836 [Anopheles gambiae str. PEST]ref XP_311506.2  ENSANGP00000022836 [Anopheles gambiae str. PEST]                                                                                                                                                                                                                                                                       |       |         |
|                                                            |                 |                     |                          |                     | >ref XP_472410.1  OJ000126_13.9 [Oryza sativa (japonica cultivar-group)]emb CAE02065.2  OJ000126_13.9 [Oryza sativa (japonica cultivar-group)]                                                                                                                                                                                                                                                          |       |         |
|                                                            |                 |                     |                          |                     | dbj BAD29299.1  40S ribosomal protein S14 [Oryza sativa (japonica cultivar-group)] dbj BAD27798.1  40S ribosomal protein S14 [Oryza sativa (japonica cultivar-group)]                                                                                                                                                                                                                                   | 151   | 2E-50   |
| CB380403                                                   | 2.03E-02        | Mo17<B73            | 1.25                     | 10                  | >ref XP_464199.1  putative ribosomal protein S14 [Oryza sativa (japonica cultivar-group)] ref XP_506724.1  PREDICTED OJ9003_G05.34 gene product [Oryza sativa (japonica cultivar-group)] dbj BAD25218.1  putative ribosomal protein S14 [Oryza sativa (japonica cultivar-group)]                                                                                                                        | 150   | 2E-50   |
|                                                            |                 |                     |                          |                     | >sp P19950 RS141 MAIZE 40S ribosomal protein S14 (Clone MCH1)                                                                                                                                                                                                                                                                                                                                           | 149   | 2E-50   |
|                                                            |                 |                     |                          |                     | >sp P19951 RS142 MAIZE 40S ribosomal protein S14 (Clone MCH2)                                                                                                                                                                                                                                                                                                                                           | 150   | 6E-50   |
|                                                            |                 |                     |                          |                     | >ref NP_187758.1  structural constituent of ribosome [Arabidopsis thaliana]gb AAM66102.1  putative 40S ribosomal protein S14 [Arabidopsis thaliana] gb AAG51428.1  putative 40S ribosomal protein s14; 67401-66292 [Arabidopsis thaliana] sp Q9CAX6 RS142 ARATH 40S ribosomal protein S14-2                                                                                                             | 150   | 5E-49   |
|                                                            |                 |                     |                          |                     | >ref XP_468362.1  glutathione reductase [Oryza sativa (japonica cultivar-group)]dbj BAD22392.1  glutathione reductase [Oryza sativa (japonica cultivar-group)] dbj BAD21653.1  glutathione reductase [Oryza sativa (japonica cultivar-group)] sp P48642 GSHRC_ORYSA Glutathione reductase, cytosolic (GR) (GRase)                                                                                       |       |         |
|                                                            |                 |                     |                          |                     | dbj BAA36283.1  glutathione reductase [Oryza sativa (japonica cultivar-group)] dbj BAA37092.1  cytosolic glutathione reductase [Oryza sativa (japonica cultivar-group)]                                                                                                                                                                                                                                 | 496   | 8E-98   |
|                                                            |                 |                     |                          |                     | >pir T03766 probable glutathione-disulfide reductase (EC 1.8.1.7) - ricedbj BAA11214.1  Glutathione Reductase [Oryza sativa (japonica cultivar-group)]                                                                                                                                                                                                                                                  | 496   | 2E-95   |
|                                                            |                 |                     |                          |                     | >gb AAQ64632.1  cytosolic glutathione reductase [Triticum monococcum]                                                                                                                                                                                                                                                                                                                                   | 496   | 3E-94   |
|                                                            |                 |                     |                          |                     | >sp Q43154 GSHRP SPIOL Glutathione reductase, chloroplast precursor (GR) (GRase)dbj BAA07108.1  Glutathione Reductase precursor [Spinacia oleracea]                                                                                                                                                                                                                                                     | 489   | 7E-75   |
|                                                            |                 |                     |                          |                     | >emb CAA66924.1  glutathione reductase [Pisum sativum]sp Q43621 GSHRC_PEA Glutathione reductase, cytosolic (GR) (GRase) (GOR2)                                                                                                                                                                                                                                                                          | 498   | 9E-75   |
| CB885254                                                   | 2.03E-02        | Mo17<B73            | 1.34                     | 9                   | >dbj BAB89354.1  ubiquitin-conjugating enzyme OsUBC5a [Oryza sativa (japonica cultivar-group)]                                                                                                                                                                                                                                                                                                          | 147   | 5E-83   |
|                                                            |                 |                     |                          |                     | >emb CAI29540.1  ubiquitin conjugating enzyme E2 [Oryza sativa (indicacultivar-group)]                                                                                                                                                                                                                                                                                                                  | 147   | 8E-83   |
|                                                            |                 |                     |                          |                     | >ref NP_567791.1  UBC9 (UBIQUITIN CONJUGATING ENZYME 9); ubiquitin conjugatingenzyme/ ubiquitin-like activating enzyme [Arabidopsis thaliana] gb AAY44849.1  ubiquitinating enzyme [Arabidopsis thaliana]                                                                                                                                                                                               | 178   | 6E-80   |
|                                                            |                 |                     |                          |                     | >gb AAG40371.1  AT4g27960 [Arabidopsis thaliana]                                                                                                                                                                                                                                                                                                                                                        | 178   | 6E-80   |
|                                                            |                 |                     |                          |                     | >ref NP_849462.1  UBC9 (UBIQUITIN CONJUGATING ENZYME 9); ubiquitin conjugatingenzyme/ ubiquitin-like activating enzyme [Arabidopsis thaliana] emb CAA78714.1  ubiquitin conjugating enzyme homolog [Arabidopsis thaliana] emb CAA51201.1  ubiquitin conjugating enzyme E2 [Arabidopsis thaliana]                                                                                                        |       |         |
|                                                            |                 |                     |                          |                     | emb CAB79598.1  ubiquitin-protein ligase UBC9 [Arabidopsis thaliana] emb CAB36765.1  ubiquitin-protein ligase UBC9 [Arabidopsis thaliana] gb AAN13102.1  E2 ubiquitin-conjugating enzyme 9 (UBC9) [Arabidopsis thaliana] sp P35132 UBC9_ARATH Ubiquitin-conjugating enzyme E2-17 kDa 9 (Ubiquitin-protein ligase 9) (Ubiquitin carrier protein 9) (UBCAT4B) gb AAA32894.1  ubiquitin conjugating enzyme | 148   | 2E-79   |
|                                                            |                 |                     |                          |                     | >emb CAA98176.1  RAB8E [Lotus corniculatus var. japonicus]                                                                                                                                                                                                                                                                                                                                              | 215   | 2E-17   |
|                                                            |                 |                     |                          |                     | >emb CAA98175.1  RAB8D [Lotus corniculatus var. japonicus]                                                                                                                                                                                                                                                                                                                                              | 214   | 2E-17   |
|                                                            |                 |                     |                          |                     | >emb CAA98174.1  RAB8C [Lotus corniculatus var. japonicus]                                                                                                                                                                                                                                                                                                                                              | 212   | 2E-17   |
|                                                            |                 |                     |                          |                     | >emb CAA98173.1  RAB8B [Lotus corniculatus var. japonicus]                                                                                                                                                                                                                                                                                                                                              | 187   | 2E-17   |
| >emb CAA98172.1  RAB8A [Lotus corniculatus var. japonicus] | 216             | 2E-17               |                          |                     |                                                                                                                                                                                                                                                                                                                                                                                                         |       |         |
| CB381574                                                   | 2.04E-02        | B73<Mo17            | 1.3                      | 3                   | >gb AAA20239.1  cyclin IaZm                                                                                                                                                                                                                                                                                                                                                                             | 420   | 1E-36   |
|                                                            |                 |                     |                          |                     | >ref NP_915872.1  putative cyclin Ia [Oryza sativa (japonica cultivar-group)]dbj BAB92272.1  putative cyclin [Oryza sativa (japonica cultivar-group)]                                                                                                                                                                                                                                                   | 449   | 6E-27   |
|                                                            |                 |                     |                          |                     | >ref XP_475474.1  hypothetical protein [Oryza sativa (japonica cultivar-group)]gb AAT69653.1  hypothetical protein [Oryza sativa (japonica cultivar-group)]                                                                                                                                                                                                                                             | 521   | 2E-21   |
|                                                            |                 |                     |                          |                     | >dbj BAA09368.1  B-type cyclin [Nicotiana tabacum]                                                                                                                                                                                                                                                                                                                                                      | 473   | 1E-19   |
|                                                            |                 |                     |                          |                     | >gb AAV41031.1  cyclin B-like protein [Nicotiana tabacum]                                                                                                                                                                                                                                                                                                                                               | 473   | 2E-19   |
|                                                            |                 |                     |                          |                     | >gb AAO43439.1  branched silkless1 [Zea mays]gb AAO21119.1  branched silkless1 [Zea mays]                                                                                                                                                                                                                                                                                                               | 313   | 2E-9    |
| BM334563                                                   | 2.06E-02        | Mo17<F1             | 1.42                     | 11                  | >dbj BAD44921.1  unknown protein [Oryza sativa (japonica cultivar-group)]dbj BAD44911.1  unknown protein [Oryza sativa (japonica cultivar-group)]                                                                                                                                                                                                                                                       | 90    | 7E-29   |
|                                                            |                 |                     |                          |                     | >ref NP_849867.1  unknown protein [Arabidopsis thaliana]ref NP_974115.1  unknown protein [Arabidopsis thaliana] ref NP_564967.1  unknown protein [Arabidopsis thaliana] gb AAM91224.1  unknown protein [Arabidopsis thaliana] gb AAM13228.1  unknown protein [Arabidopsis thaliana] gb AAM61026.1  unknown [Arabidopsis thaliana] gb AAG60113.1  unknown protein [Arabidopsis thaliana]                 | 137   | 1E-13   |
|                                                            |                 |                     |                          |                     |                                                                                                                                                                                                                                                                                                                                                                                                         |       |         |

**Table 4. Microarray analysis results, mode of gene action classification, and BLAST annotation for the 1,367 ESTs identified as differentially expressed among genotypes (15% FDR)**

| GenBank accession no. | Overall P value | Significant pattern | Fold change <sup>‡</sup> | Sector <sup>‡</sup> | BLAST annotation*                                                                                                                                                                                                                                                                                                                                                                                                                                                                                                                                                                                                                                                                                                                                                                                                                                             | Score | E value |
|-----------------------|-----------------|---------------------|--------------------------|---------------------|---------------------------------------------------------------------------------------------------------------------------------------------------------------------------------------------------------------------------------------------------------------------------------------------------------------------------------------------------------------------------------------------------------------------------------------------------------------------------------------------------------------------------------------------------------------------------------------------------------------------------------------------------------------------------------------------------------------------------------------------------------------------------------------------------------------------------------------------------------------|-------|---------|
|                       |                 |                     |                          |                     | >gb AAM64550.1  unknown [Arabidopsis thaliana]                                                                                                                                                                                                                                                                                                                                                                                                                                                                                                                                                                                                                                                                                                                                                                                                                | 102   | 5E-13   |
|                       |                 |                     |                          |                     | >gb ABA97694.1  expressed protein [Oryza sativa (japonica cultivar-group)]                                                                                                                                                                                                                                                                                                                                                                                                                                                                                                                                                                                                                                                                                                                                                                                    | 95    | 1E-12   |
|                       |                 |                     |                          |                     | >ref NP_568985.1  unknown protein [Arabidopsis thaliana]gb AAM19915.1  AT5g64130/MHJ24_11 [Arabidopsis thaliana] gb AAL25551.1  AT5g64130/MHJ24_11 [Arabidopsis thaliana] gb AAM67262.1  unknown [Arabidopsis thaliana]                                                                                                                                                                                                                                                                                                                                                                                                                                                                                                                                                                                                                                       | 115   | 3E-12   |
| BM331929              | 2.07E-02        | B73<F1=Mo17         | 1.3                      | 2                   | >dbj BAD81832.1  transcription initiation factor IID (TFIID) subunit A-like protein[Oryza sativa (japonica cultivar-group)] dbj BAD82661.1  transcription initiation factor IID (TFIID) subunit A-like protein [Oryza sativa (japonica cultivar-group)]                                                                                                                                                                                                                                                                                                                                                                                                                                                                                                                                                                                                       | 542   | 4E-35   |
|                       |                 |                     |                          |                     | >dbj BAE46416.1  TATA binding protein associated factor [Solanum tuberosum]                                                                                                                                                                                                                                                                                                                                                                                                                                                                                                                                                                                                                                                                                                                                                                                   | 638   | 3E-10   |
|                       |                 |                     |                          |                     | >ref NP_849680.1  transcription initiation factor [Arabidopsis thaliana]ref NP_564023.1  transcription initiation factor [Arabidopsis thaliana] gb AAR28016.1  TAF12b [Arabidopsis thaliana] gb AAM14362.1  unknown protein [Arabidopsis thaliana] gb AAL07223.1  unknown protein [Arabidopsis thaliana]                                                                                                                                                                                                                                                                                                                                                                                                                                                                                                                                                      | 683   | 6E-9    |
|                       |                 |                     |                          |                     | >dbj BAD82054.1  transcription initiation factor IID (TFIID) subunit A-like protein[Oryza sativa (japonica cultivar-group)]                                                                                                                                                                                                                                                                                                                                                                                                                                                                                                                                                                                                                                                                                                                                   | 295   | 3E-7    |
|                       |                 |                     |                          |                     | >gb AAF97312.1  Unknown protein [Arabidopsis thaliana]                                                                                                                                                                                                                                                                                                                                                                                                                                                                                                                                                                                                                                                                                                                                                                                                        | 674   | 1E-6    |
| DV621908              | 2.07E-02        | Mo17<B73=F1         | 1.2                      | 10                  | >ref XP_468756.1  putative ribosomal protein S19 [Oryza sativa (japonica cultivar-group)] ref XP_468752.1  putative ribosomal protein S19 [Oryza sativa (japonica cultivar-group)] gb AAP20855.1  putative ribosomal protein S19 [Oryza sativa (japonica cultivar-group)] gb AAP20842.1  putative ribosomal protein S19 [Oryza sativa (japonica cultivar-group)] sp P40978 RS19 ORYSA 40S ribosomal protein S19                                                                                                                                                                                                                                                                                                                                                                                                                                               | 146   | 9E-72   |
|                       |                 |                     |                          |                     | >gb AAW34237.1  putative ribosomal protein S19 [Oryza sativa (japonica cultivar-group)]                                                                                                                                                                                                                                                                                                                                                                                                                                                                                                                                                                                                                                                                                                                                                                       | 144   | 6E-69   |
|                       |                 |                     |                          |                     | >gb AAW34236.1  putative ribosomal protein S19 [Oryza sativa (japonica cultivar-group)]                                                                                                                                                                                                                                                                                                                                                                                                                                                                                                                                                                                                                                                                                                                                                                       | 166   | 4E-68   |
|                       |                 |                     |                          |                     | >gb AAW34240.1  putative ribosomal protein S19 [Oryza sativa (japonica cultivar-group)]                                                                                                                                                                                                                                                                                                                                                                                                                                                                                                                                                                                                                                                                                                                                                                       | 122   | 6E-64   |
|                       |                 |                     |                          |                     | >gb ABB87116.1  40S ribosomal protein S19-like [Solanum tuberosum]                                                                                                                                                                                                                                                                                                                                                                                                                                                                                                                                                                                                                                                                                                                                                                                            | 143   | 6E-58   |
| DV491930              | 2.08E-02        | B73<Mo17            | 1.36                     | 4                   | >ref XP_550363.1  putative gamma-adaptin 1 [Oryza sativa (japonica cultivar-group)]dbj BAD67607.1  putative gamma-adaptin 1 [Oryza sativa (japonica cultivar-group)]                                                                                                                                                                                                                                                                                                                                                                                                                                                                                                                                                                                                                                                                                          | 870   | 8E-46   |
|                       |                 |                     |                          |                     | >gb AAK98709.1  Putative gamma-adaptin 1 [Oryza sativa]                                                                                                                                                                                                                                                                                                                                                                                                                                                                                                                                                                                                                                                                                                                                                                                                       | 1354  | 1E-38   |
|                       |                 |                     |                          |                     | >gb AAD28247.1  gamma-adaptin 1 [Arabidopsis thaliana]gb AAC28338.1  gamma-adaptin 1 [Arabidopsis thaliana]                                                                                                                                                                                                                                                                                                                                                                                                                                                                                                                                                                                                                                                                                                                                                   | 876   | 5E-32   |
|                       |                 |                     |                          |                     | >emb CAB39730.1  adaptor protein complex AP-1 large subunit; gamma-adaptin 2[Arabidopsis thaliana]                                                                                                                                                                                                                                                                                                                                                                                                                                                                                                                                                                                                                                                                                                                                                            | 876   | 3E-31   |
|                       |                 |                     |                          |                     | >ref NP_173802.1  GAMMA-ADAPTIN 1 (GAMMA-ADAPTIN 1); clathrin binding [Arabidopsisthaliana] ref NP_849701.1  GAMMA-ADAPTIN 1 (GAMMA-ADAPTIN 1); clathrin binding [Arabidopsis thaliana] gb AAO63977.1  putative gamma-adaptin [Arabidopsis thaliana] gb AAO42305.1  putative gamma-adaptin [Arabidopsis thaliana]                                                                                                                                                                                                                                                                                                                                                                                                                                                                                                                                             | 876   | 3E-31   |
| CD670181              | 2.08E-02        | B73<F1=Mo17         | 1.31                     | 3                   | >ref XP_479646.1  putative HMG type nucleosome/chromatin assembly factor D [Oryzasativa (japonica cultivar-group)] dbj BAD03552.1  putative HMG type nucleosome/chromatin assembly factor D [Oryza sativa (japonica cultivar-group)]                                                                                                                                                                                                                                                                                                                                                                                                                                                                                                                                                                                                                          | 203   | 1E-47   |
|                       |                 |                     |                          |                     | >gb AAM93218.1  nucleosome/chromatin assembly factor D protein NFD106 [Zea mays]gb AAL33652.1  HMG type nucleosome/chromatin assembly factor D [Zea mays]                                                                                                                                                                                                                                                                                                                                                                                                                                                                                                                                                                                                                                                                                                     | 154   | 5E-42   |
|                       |                 |                     |                          |                     | >ref NP_568431.1  HMGB6; transcription factor [Arabidopsis thaliana]gb AAM63233.1  unknown [Arabidopsis thaliana] dbj BAC43282.1  unknown protein [Arabidopsis thaliana]                                                                                                                                                                                                                                                                                                                                                                                                                                                                                                                                                                                                                                                                                      | 241   | 1E-30   |
|                       |                 |                     |                          |                     | >dbj BAB09558.1  unnamed protein product [Arabidopsis thaliana]                                                                                                                                                                                                                                                                                                                                                                                                                                                                                                                                                                                                                                                                                                                                                                                               | 226   | 2E-16   |
|                       |                 |                     |                          |                     | >gb AAM64404.1  putative HMG protein [Arabidopsis thaliana]                                                                                                                                                                                                                                                                                                                                                                                                                                                                                                                                                                                                                                                                                                                                                                                                   | 138   | 4E-16   |
| CB885421              | 2.08E-02        | Mo17<B73=F1         | 1.2                      | 10                  | >ref NP_922210.1  putative mitochondrial NAD+-dependent malic enzyme protein [Oryzasativa (japonica cultivar-group)] gb AAG13628.1  putative mitochondrial NAD+-dependent malic enzyme protein [Oryza sativa (japonica cultivar-group)]                                                                                                                                                                                                                                                                                                                                                                                                                                                                                                                                                                                                                       | 520   | 2E-63   |
|                       |                 |                     |                          |                     | >gb ABB47851.1  mitochondrial NAD+-dependent malic enzyme protein, putative [Oryzasativa (japonica cultivar-group)]                                                                                                                                                                                                                                                                                                                                                                                                                                                                                                                                                                                                                                                                                                                                           | 532   | 2E-63   |
|                       |                 |                     |                          |                     | >gb ABB47850.1  mitochondrial NAD+-dependent malic enzyme protein, putative [Oryzasativa (japonica cultivar-group)]                                                                                                                                                                                                                                                                                                                                                                                                                                                                                                                                                                                                                                                                                                                                           | 538   | 2E-63   |
|                       |                 |                     |                          |                     | >gb ABB47849.1  mitochondrial NAD+-dependent malic enzyme protein, putative [Oryzasativa (japonica cultivar-group)]                                                                                                                                                                                                                                                                                                                                                                                                                                                                                                                                                                                                                                                                                                                                           | 620   | 2E-63   |
|                       |                 |                     |                          |                     | >emb CAA80547.1  precursor of the 59kDa subunit of the mitochondrial NAD+-dependentmalic enzyme [Solanum tuberosum] sp P37225 MAON_SOLITU NAD-dependent malic enzyme 59 kDa isoform, mitochondrial precursor (NAD-ME)                                                                                                                                                                                                                                                                                                                                                                                                                                                                                                                                                                                                                                         | 601   | 2E-54   |
| DV492328              | 2.08E-02        | B73<F1<Mo17         | 1.41                     | 4                   | >ref ZP_00948066.1  hypothetical protein BbacK_01000360 [Bartonella bacilliformisKC583]                                                                                                                                                                                                                                                                                                                                                                                                                                                                                                                                                                                                                                                                                                                                                                       | 152   | 6E-38   |
|                       |                 |                     |                          |                     | >ref ZP_00679255.1  hypothetical protein PproDRAFT_0591 [Pelobacter propionicus DSM2379] gb EAO35260.1  hypothetical protein PproDRAFT_0591 [Pelobacter propionicus DSM 2379]                                                                                                                                                                                                                                                                                                                                                                                                                                                                                                                                                                                                                                                                                 | 167   | 1E-34   |
|                       |                 |                     |                          |                     | >gb AAU03684.1  conserved hypothetical protein [Rickettsia typhi str. Wilmington]ref YP_067166.1  hypothetical protein RT0201 [Rickettsia typhi str. Wilmington]                                                                                                                                                                                                                                                                                                                                                                                                                                                                                                                                                                                                                                                                                              | 138   | 2E-33   |
|                       |                 |                     |                          |                     | >ref ZP_00733436.1  cell wall-associated hydrolase [Actinobacillus succinogenes 130Z]ref ZP_00733163.1  cell wall-associated hydrolase [Actinobacillus succinogenes 130Z] ref ZP_00732815.1  cell wall-associated hydrolase [Actinobacillus succinogenes 130Z] ref ZP_00732790.1  cell wall-associated hydrolase [Actinobacillus succinogenes 130Z] ref ZP_00731820.1  cell wall-associated hydrolase [Actinobacillus succinogenes 130Z] gb EAO51165.1  cell wall-associated hydrolase [Actinobacillus succinogenes 130Z] gb EAO50163.1  cell wall-associated hydrolase [Actinobacillus succinogenes 130Z] gb EAO50139.1  cell wall-associated hydrolase [Actinobacillus succinogenes 130Z] gb EAO49775.1  cell wall-associated hydrolase [Actinobacillus succinogenes 130Z] gb EAO49498.1  cell wall-associated hydrolase [Actinobacillus succinogenes 130Z] | 144   | 3E-33   |
|                       |                 |                     |                          |                     | >ref ZP_00307967.1  hypothetical protein Chut02003441 [Cytophaga hutchinsonii]                                                                                                                                                                                                                                                                                                                                                                                                                                                                                                                                                                                                                                                                                                                                                                                | 152   | 1E-32   |
| CB886104              | 2.08E-02        | B73=Mo17<F1         | 1.23                     | 1                   | >emb CAA42530.1  histone H2B [Triticum aestivum]sp P27807 H2B1 WHEAT Histone H2B                                                                                                                                                                                                                                                                                                                                                                                                                                                                                                                                                                                                                                                                                                                                                                              | 152   | 4E-35   |



**Table 4. Microarray analysis results, mode of gene action classification, and BLAST annotation for the 1,367 ESTs identified as differentially expressed among genotypes (15% FDR)**

| GenBank accession no. | Overall P value | Significant pattern | Fold change <sup>†</sup> | Sector <sup>‡</sup> | BLAST annotation*                                                                                                                                                                                                                                                                                                                                                                                                                                                                                                                                                                                                                                                                                                                                                                                                                                        | Score | E value |
|-----------------------|-----------------|---------------------|--------------------------|---------------------|----------------------------------------------------------------------------------------------------------------------------------------------------------------------------------------------------------------------------------------------------------------------------------------------------------------------------------------------------------------------------------------------------------------------------------------------------------------------------------------------------------------------------------------------------------------------------------------------------------------------------------------------------------------------------------------------------------------------------------------------------------------------------------------------------------------------------------------------------------|-------|---------|
|                       |                 |                     |                          |                     | >spP54348 H2B5 MAIZE Histone H2Bgb AAB04688.1  histone H2B                                                                                                                                                                                                                                                                                                                                                                                                                                                                                                                                                                                                                                                                                                                                                                                               | 154   | 4E-35   |
|                       |                 |                     |                          |                     | >emb CAA49584.1  H2B histone [Zea mays]sp Q43261 H2B3 MAIZE Histone H2B.3                                                                                                                                                                                                                                                                                                                                                                                                                                                                                                                                                                                                                                                                                                                                                                                | 153   | 1E-33   |
|                       |                 |                     |                          |                     | >emb CAA40565.1  H2B histone [Zea mays]sp P30756 H2B2 MAIZE Histone H2B.2                                                                                                                                                                                                                                                                                                                                                                                                                                                                                                                                                                                                                                                                                                                                                                                | 150   | 2E-33   |
|                       |                 |                     |                          |                     | >emb CAA40564.1  H2B histone [Zea mays]sp P30755 H2B1 MAIZE Histone H2B.1                                                                                                                                                                                                                                                                                                                                                                                                                                                                                                                                                                                                                                                                                                                                                                                | 151   | 3E-33   |
| DV942241              | 2.08E-02        | F1=Mo17<B73         | 1.37                     | 8                   | ns                                                                                                                                                                                                                                                                                                                                                                                                                                                                                                                                                                                                                                                                                                                                                                                                                                                       |       |         |
| BM073440              | 2.08E-02        | Mo17<B73            | 1.52                     | 9                   | >dbj BAD33948.1  unknown protein [Oryza sativa (japonica cultivar-group)]                                                                                                                                                                                                                                                                                                                                                                                                                                                                                                                                                                                                                                                                                                                                                                                | 244   | 2E-38   |
|                       |                 |                     |                          |                     | >ref XP_482938.1  hypothetical protein [Oryza sativa (japonica cultivar-group)]dbj BAD09202.1  hypothetical protein [Oryza sativa (japonica cultivar-group)]                                                                                                                                                                                                                                                                                                                                                                                                                                                                                                                                                                                                                                                                                             | 254   | 1E-29   |
|                       |                 |                     |                          |                     | >ref NP_199082.1  unknown protein [Arabidopsis thaliana]gb AAU29467.1  At5g42680 [Arabidopsis thaliana] gb AAT41771.1  At5g42680 [Arabidopsis thaliana]                                                                                                                                                                                                                                                                                                                                                                                                                                                                                                                                                                                                                                                                                                  |       |         |
|                       |                 |                     |                          |                     | dbj BAB10624.1  unnamed protein product [Arabidopsis thaliana]                                                                                                                                                                                                                                                                                                                                                                                                                                                                                                                                                                                                                                                                                                                                                                                           | 238   | 1E-16   |
|                       |                 |                     |                          |                     | >ref NP_195671.1  unknown protein [Arabidopsis thaliana]emb CAB80624.1  putative protein [Arabidopsis thaliana] emb CAB44696.1  putative protein [Arabidopsis thaliana] gb AAO63334.1  At4g39610 [Arabidopsis thaliana] dbj BAC43028.1  unknown protein [Arabidopsis thaliana]                                                                                                                                                                                                                                                                                                                                                                                                                                                                                                                                                                           | 264   | 2E-16   |
|                       |                 |                     |                          |                     | >gb AAM67173.1  unknown [Arabidopsis thaliana]                                                                                                                                                                                                                                                                                                                                                                                                                                                                                                                                                                                                                                                                                                                                                                                                           | 257   | 7E-16   |
| DV489939              | 2.09E-02        | Mo17<B73            | 1.54                     | 9                   | >dbj BAD61148.1  BY-2 kinesin-like protein 10-like [Oryza sativa (japonica cultivar-group)]                                                                                                                                                                                                                                                                                                                                                                                                                                                                                                                                                                                                                                                                                                                                                              | 193   | 4E-19   |
|                       |                 |                     |                          |                     | >dbj BAD61147.1  kinesin heavy chain-like [Oryza sativa (japonica cultivar-group)]                                                                                                                                                                                                                                                                                                                                                                                                                                                                                                                                                                                                                                                                                                                                                                       | 258   | 4E-19   |
|                       |                 |                     |                          |                     | >ref NP_917771.1  kinesin-like protein [Oryza sativa (japonica cultivar-group)]                                                                                                                                                                                                                                                                                                                                                                                                                                                                                                                                                                                                                                                                                                                                                                          | 707   | 4E-19   |
|                       |                 |                     |                          |                     | >dbj BAB40710.1  BY-2 kinesin-like protein 10 [Nicotiana tabacum]                                                                                                                                                                                                                                                                                                                                                                                                                                                                                                                                                                                                                                                                                                                                                                                        | 703   | 2E-11   |
|                       |                 |                     |                          |                     | >dbj BAB02671.1  unnamed protein product [Arabidopsis thaliana]                                                                                                                                                                                                                                                                                                                                                                                                                                                                                                                                                                                                                                                                                                                                                                                          | 706   | 2E-11   |
| DV550068              | 2.10E-02        | B73<Mo17            | 3.79                     | 3                   | >gb AAP94585.1  putative gag-pol precursor [Zea mays]                                                                                                                                                                                                                                                                                                                                                                                                                                                                                                                                                                                                                                                                                                                                                                                                    | 1833  | 9E-80   |
|                       |                 |                     |                          |                     | >ref NP_921259.1  putative retroelement [Oryza sativa (japonica cultivar-group)]gb AAK52121.1  Putative retroelement [Oryza sativa (japonica cultivar-group)]                                                                                                                                                                                                                                                                                                                                                                                                                                                                                                                                                                                                                                                                                            | 2079  | 1E-45   |
|                       |                 |                     |                          |                     | >ref XP_474845.1  OSJNBa0035013.3 [Oryza sativa (japonica cultivar-group)]emb CAD40114.1  OSJNBa0035013.3 [Oryza sativa (japonica cultivar-group)]                                                                                                                                                                                                                                                                                                                                                                                                                                                                                                                                                                                                                                                                                                       | 2008  | 1E-45   |
|                       |                 |                     |                          |                     | >gb ABA98419.1  retrotransposon protein, putative, Ty3-gypsy sub-class [Oryza sativa(japonica cultivar-group)]                                                                                                                                                                                                                                                                                                                                                                                                                                                                                                                                                                                                                                                                                                                                           | 1304  | 4E-45   |
|                       |                 |                     |                          |                     | >gb ABA97550.1  retrotransposon protein, putative, Ty3-gypsy sub-class [Oryza sativa(japonica cultivar-group)]                                                                                                                                                                                                                                                                                                                                                                                                                                                                                                                                                                                                                                                                                                                                           | 1541  | 6E-45   |
| CB885984              | 2.10E-02        | B73=F1<Mo17         | 1.33                     | 4                   | >dbj BAD68706.1  putative ketol-acid reductoisomerase precursor [Oryza sativa(japonica cultivar-group)]                                                                                                                                                                                                                                                                                                                                                                                                                                                                                                                                                                                                                                                                                                                                                  | 548   | 2E-85   |
|                       |                 |                     |                          |                     | >ref NP_917284.1  putative ketol-acid reductoisomerase [Oryza sativa (japonica cultivar-group)]                                                                                                                                                                                                                                                                                                                                                                                                                                                                                                                                                                                                                                                                                                                                                          | 581   | 2E-85   |
|                       |                 |                     |                          |                     | >gb AAU44107.1  putative ketol-acid reductoisomerase [Oryza sativa (japonica cultivar-group)]                                                                                                                                                                                                                                                                                                                                                                                                                                                                                                                                                                                                                                                                                                                                                            | 578   | 2E-84   |
|                       |                 |                     |                          |                     | >dbj BAD94384.1  ketol-acid reductoisomerase [Arabidopsis thaliana]                                                                                                                                                                                                                                                                                                                                                                                                                                                                                                                                                                                                                                                                                                                                                                                      | 344   | 6E-81   |
|                       |                 |                     |                          |                     | >ref NP_191420.1  ketol-acid reductoisomerase [Arabidopsis thaliana]emb CAA49506.1  ketol-acid reductoisomerase [Arabidopsis thaliana] emb CAB68199.1  ketol-acid reductoisomerase [Arabidopsis thaliana] gb AAN33197.1  At3g58610/F14P22_200 [Arabidopsis thaliana] gb AAN31816.1  putative ketol-acid reductoisomerase [Arabidopsis thaliana] gb AAM20206.1  putative ketol-acid reductoisomerase [Arabidopsis thaliana] gb AAL38839.1  putative ketol-acid reductoisomerase [Arabidopsis thaliana] gb AAG42917.1  putative ketol-acid reductoisomerase [Arabidopsis thaliana] gb AAL32973.1  AT3g58610/F14P22_200 [Arabidopsis thaliana] gb AAG40022.1  AT3g58610 [Arabidopsis thaliana] sp Q05758 ILV5_ARATH Ketol-acid reductoisomerase, chloroplast precursor (Acetohydroxy-acid reductoisomerase) (Alpha-keto-beta-hydroxylacil reductoisomerase) | 591   | 6E-81   |
| CD059021              | 2.10E-02        | B73=F1<Mo17         | 1.24                     | 4                   | >dbj BAD45854.1  RISBZ5 [Oryza sativa (japonica cultivar-group)]dbj BAB39175.1  RISBZ5 [Oryza sativa]                                                                                                                                                                                                                                                                                                                                                                                                                                                                                                                                                                                                                                                                                                                                                    | 295   | 4E-31   |
|                       |                 |                     |                          |                     | >ref XP_464322.1  RISBZ4 [Oryza sativa (japonica cultivar-group)]dbj BAD27607.1  RISBZ4 [Oryza sativa (japonica cultivar-group)] dbj BAD26199.1  RISBZ4 [Oryza sativa (japonica cultivar-group)]                                                                                                                                                                                                                                                                                                                                                                                                                                                                                                                                                                                                                                                         | 277   | 2E-20   |
|                       |                 |                     |                          |                     | >dbj BAD27900.1  putative RISBZ4 [Oryza sativa (japonica cultivar-group)]gb AAC37418.1  transcriptional activator protein                                                                                                                                                                                                                                                                                                                                                                                                                                                                                                                                                                                                                                                                                                                                | 298   | 5E-20   |
|                       |                 |                     |                          |                     | >emb CAA04639.1  RITA-2 protein [Oryza sativa (japonica cultivar-group)]                                                                                                                                                                                                                                                                                                                                                                                                                                                                                                                                                                                                                                                                                                                                                                                 | 199   | 8E-20   |
|                       |                 |                     |                          |                     | >dbj BAB39174.1  RISBZ4 [Oryza sativa]                                                                                                                                                                                                                                                                                                                                                                                                                                                                                                                                                                                                                                                                                                                                                                                                                   | 278   | 8E-20   |
| CD573390              | 2.10E-02        | Mo17<B73=F1         | 1.3                      | 11                  | >gb AAF13094.1  unknown protein [Arabidopsis thaliana]gb AAF21186.1  unknown protein [Arabidopsis thaliana]                                                                                                                                                                                                                                                                                                                                                                                                                                                                                                                                                                                                                                                                                                                                              | 196   | 4E-30   |
|                       |                 |                     |                          |                     | >ref NP_566319.1  unknown protein [Arabidopsis thaliana]ref NP_850538.1  unknown protein [Arabidopsis thaliana] gb AAL47395.1  unknown protein [Arabidopsis thaliana] gb AAL16180.1  At3g07760/F17A17.10 [Arabidopsis thaliana] gb AAK96782.1  Unknown protein [Arabidopsis thaliana] gb AAM66036.1  unknown [Arabidopsis thaliana]                                                                                                                                                                                                                                                                                                                                                                                                                                                                                                                      | 125   | 4E-30   |
|                       |                 |                     |                          |                     | >gb ABA99120.1  AC009176 putative heat-shock protein [Oryza sativa (japonica cultivar-group)]                                                                                                                                                                                                                                                                                                                                                                                                                                                                                                                                                                                                                                                                                                                                                            | 1210  | 4E-10   |
|                       |                 |                     |                          |                     | >ref XP_468756.1  putative ribosomal protein S19 [Oryza sativa (japonica cultivar-group)] ref XP_468752.1  putative ribosomal protein S19 [Oryza sativa (japonica cultivar-group)] gb AAP20855.1  putative ribosomal protein S19 [Oryza sativa (japonica cultivar-group)] gb AAP20842.1  putative ribosomal protein S19 [Oryza sativa (japonica cultivar-group)] sp P40978 RS19 ORYSA 40S ribosomal protein S19                                                                                                                                                                                                                                                                                                                                                                                                                                          | 146   | 9E-72   |
| CB604155              | 2.10E-02        | Mo17<B73=F1         | 1.25                     | 11                  | >gb AAW34237.1  putative ribosomal protein S19 [Oryza sativa (japonica cultivar-group)]                                                                                                                                                                                                                                                                                                                                                                                                                                                                                                                                                                                                                                                                                                                                                                  | 144   | 6E-69   |
|                       |                 |                     |                          |                     | >gb AAW34236.1  putative ribosomal protein S19 [Oryza sativa (japonica cultivar-group)]                                                                                                                                                                                                                                                                                                                                                                                                                                                                                                                                                                                                                                                                                                                                                                  | 166   | 4E-68   |
|                       |                 |                     |                          |                     | >gb AAW34240.1  putative ribosomal protein S19 [Oryza sativa (japonica cultivar-group)]                                                                                                                                                                                                                                                                                                                                                                                                                                                                                                                                                                                                                                                                                                                                                                  | 122   | 6E-64   |
|                       |                 |                     |                          |                     | >gb ABB87116.1  40S ribosomal protein S19-like [Solanum tuberosum]                                                                                                                                                                                                                                                                                                                                                                                                                                                                                                                                                                                                                                                                                                                                                                                       | 143   | 6E-58   |
| BM351298              | 2.11E-02        | Mo17<B73            | 1.33                     | 10                  | >ref XP_475883.1  protein phosphatase 2A B'kappa subunit [Oryza sativa (japonica cultivar-group)] gb AAT58738.1  protein phosphatase 2A B'kappa subunit [Oryza sativa (japonica cultivar-group)] emb CAC85920.1  protein phosphatase 2A B'kappa subunit [Oryza sativa (japonica cultivar-group)]                                                                                                                                                                                                                                                                                                                                                                                                                                                                                                                                                         | 510   | 1E-41   |

**Table 4. Microarray analysis results, mode of gene action classification, and BLAST annotation for the 1,367 ESTs identified as differentially expressed among genotypes (15% FDR)**

| GenBank accession no. | Overall P value | Significant pattern | Fold change <sup>†</sup> | Sector <sup>‡</sup> | BLAST annotation*                                                                                                                                                                                                                                                                                                                                                           | Score | E value |
|-----------------------|-----------------|---------------------|--------------------------|---------------------|-----------------------------------------------------------------------------------------------------------------------------------------------------------------------------------------------------------------------------------------------------------------------------------------------------------------------------------------------------------------------------|-------|---------|
|                       |                 |                     |                          |                     | >emb CAB76153.1  putative B' regulatory subunit of PP2A [Oryza sativa]                                                                                                                                                                                                                                                                                                      | 143   | 3E-41   |
|                       |                 |                     |                          |                     | >ref NP_197933.1  protein phosphatase type 2A regulator [Arabidopsis thaliana]gb AAN13126.1  putative AtBgamm protein [Arabidopsis thaliana]                                                                                                                                                                                                                                |       |         |
|                       |                 |                     |                          |                     | gb AAL24096.1  putative AtBgamm protein [Arabidopsis thaliana] sp Q93YV6 2A51_ARATH Serine/threonine protein phosphatase 2A 57 kDa regulatory subunit B' iota isoform (PP2A, B' subunit, iota isoform) (AtB' iota)                                                                                                                                                          | 500   | 3E-24   |
|                       |                 |                     |                          |                     | >gb AAT77357.1  unknown protein [Oryza sativa (japonica cultivar-group)]                                                                                                                                                                                                                                                                                                    | 491   | 2E-21   |
|                       |                 |                     |                          |                     | >ref NP_188802.1  protein phosphatase type 2A regulator [Arabidopsis thaliana]                                                                                                                                                                                                                                                                                              | 546   | 1E-19   |
| DV489574              | 2.11E-02        | B73<Mo17            | 1.59                     | 4                   | >dbj BAD87534.1  putative beta-N-acetylhexosaminidase [Oryza sativa (japonica cultivar-group)]                                                                                                                                                                                                                                                                              | 526   | 2E-81   |
|                       |                 |                     |                          |                     | >ref NP_915111.1  beta-N-acetylhexosaminidase-like protein [Oryza sativa (japonica cultivar-group)]                                                                                                                                                                                                                                                                         | 496   | 2E-81   |
|                       |                 |                     |                          |                     | >gb AAV32135.1  putative beta-N-acetylhexosaminidase [Oryza sativa (japonica cultivar-group)]                                                                                                                                                                                                                                                                               | 531   | 5E-68   |
|                       |                 |                     |                          |                     | >gb AAT77374.1  putative beta-N-acetylhexosaminidase [Oryza sativa (japonica cultivar-group)]                                                                                                                                                                                                                                                                               | 527   | 5E-68   |
|                       |                 |                     |                          |                     | >ref NP_176737.2  beta-N-acetylhexosaminidase [Arabidopsis thaliana]gb AAN33206.1  At1g65600/F5114_13 [Arabidopsis thaliana] gb AAM91092.1  At1g65600/F5114_13 [Arabidopsis thaliana]                                                                                                                                                                                       | 535   | 4E-63   |
| CB617035              | 2.11E-02        | Mo17<F1             | 1.27                     | 11                  | >gb AAT73618.1  calmodulin cam-205 [Daucus carota]                                                                                                                                                                                                                                                                                                                          | 149   | 2E-61   |
|                       |                 |                     |                          |                     | >emb CAA06307.1  CaM-2 [Nicotiana glauca]emb CAA06306.1  CaM-1 [Nicotiana glauca]                                                                                                                                                                                                                                                                                           | 122   | 2E-61   |
|                       |                 |                     |                          |                     | >gb AAQ63462.1  calmodulin 8 [Daucus carota]gb AAQ63461.1  calmodulin 4 [Daucus carota]                                                                                                                                                                                                                                                                                     | 150   | 2E-61   |
|                       |                 |                     |                          |                     | >emb CAA74307.1  calmodulin [Zea mays]emb CAA46150.1  calmodulin [Oryza sativa] gb AAD10246.1  calmodulin [Phaseolus vulgaris]                                                                                                                                                                                                                                              | 149   | 2E-61   |
|                       |                 |                     |                          |                     | >emb CAA36644.1  unnamed protein product [Medicago sativa]gb AAM81203.1  calmodulin 2 [Medicago truncatula] gb AAA34238.1  calmodulin [Vigna radiata]                                                                                                                                                                                                                       |       |         |
|                       |                 |                     |                          |                     | gb AAD10244.1  calmodulin [Phaseolus vulgaris] sp P17928 CALM_MEDSA Calmodulin (CaM) gb AAA34014.1  calmodulin gb AAA34013.1  calmodulin prf 2121384C calmodulin prf 2121384A calmodulin                                                                                                                                                                                    | 149   | 2E-61   |
| CB381685              | 2.11E-02        | Mo17<B73=F1         | 1.27                     | 10                  | >gb AAL59231.1  ribosomal protein L35A [Zea mays]                                                                                                                                                                                                                                                                                                                           | 112   | 4E-59   |
|                       |                 |                     |                          |                     | >gb AAK73115.1  ribosomal protein L35A [Zea mays]                                                                                                                                                                                                                                                                                                                           | 112   | 6E-59   |
|                       |                 |                     |                          |                     | >ref XP_468159.1  putative ribosomal protein L35A [Oryza sativa (japonica cultivar-group)] ref XP_507015.1  PREDICTED OJ1715_H01.42 gene product [Oryza sativa (japonica cultivar-group)] dbj BAD19312.1  putative ribosomal protein L35A [Oryza sativa (japonica cultivar-group)] dbj BAD19202.1  putative ribosomal protein L35A [Oryza sativa (japonica cultivar-group)] | 112   | 6E-55   |
|                       |                 |                     |                          |                     | >ref XP_475896.1  putative ribosomal protein L35A [Oryza sativa (japonica cultivar-group)] ref XP_475888.1  putative ribosomal protein L35A [Oryza sativa (japonica cultivar-group)] gb AAT58712.1  putative ribosomal protein L35A [Oryza sativa (japonica cultivar-group)] gb AAT58704.1  putative ribosomal protein L35A [Oryza sativa (japonica cultivar-group)]        | 111   | 4E-51   |
|                       |                 |                     |                          |                     | >gb AAK25760.1  ribosomal protein L33 [Castanea sativa]                                                                                                                                                                                                                                                                                                                     | 112   | 5E-50   |
| DV550679              | 2.12E-02        | B73=Mo17<F1         | 1.44                     | 1                   | ns                                                                                                                                                                                                                                                                                                                                                                          |       |         |
|                       |                 |                     |                          |                     | >ref XP_478106.1  unknown protein [Oryza sativa (japonica cultivar-group)]dbj BAC84361.1  unknown protein [Oryza sativa (japonica cultivar-group)]                                                                                                                                                                                                                          |       |         |
| DV550393              | 2.12E-02        | B73=Mo17<F1         | 1.35                     | 12                  | dbj BAD31502.1  unknown protein [Oryza sativa (japonica cultivar-group)]                                                                                                                                                                                                                                                                                                    | 145   | 2E-11   |
| DV621294              | 2.12E-02        | B73=F1<Mo17         | 1.26                     | 4                   | ns                                                                                                                                                                                                                                                                                                                                                                          |       |         |
| CD651750              | 2.12E-02        | B73=Mo17<F1         | 1.29                     | 12                  | >gb AAF71261.2  beta-glucosidase aggregating factor precursor [Zea mays]                                                                                                                                                                                                                                                                                                    | 306   | 4E-22   |
|                       |                 |                     |                          |                     | >gb AAA87041.1  putative 32.6 kDa jasmonate-induced protein [Hordeum vulgare]gb AAB72096.1  32 kDa protein [Hordeum vulgare]                                                                                                                                                                                                                                                | 304   | 1E-21   |
|                       |                 |                     |                          |                     | >gb ABA96667.1  jacalin homolog [Oryza sativa (japonica cultivar-group)]                                                                                                                                                                                                                                                                                                    | 307   | 2E-21   |
|                       |                 |                     |                          |                     | >gb AAA87042.1  putative 32.7 kDa jasmonate-induced protein [Hordeum vulgare]gb AAB72097.1  32 kDa protein [Hordeum vulgare]                                                                                                                                                                                                                                                | 304   | 7E-21   |
|                       |                 |                     |                          |                     | >gb AAR20919.1  jasmonate-induced protein [Triticum aestivum]                                                                                                                                                                                                                                                                                                               | 304   | 2E-20   |
| DV495219              | 2.12E-02        | B73<F1=Mo17         | 1.35                     | 2                   | >ref XP_468505.1  unknown protein [Oryza sativa (japonica cultivar-group)]dbj BAD23057.1  unknown protein [Oryza sativa (japonica cultivar-group)]                                                                                                                                                                                                                          | 819   | 1E-25   |
|                       |                 |                     |                          |                     | >dbj BAD94762.1  hypothetical protein [Arabidopsis thaliana]                                                                                                                                                                                                                                                                                                                | 438   | 5E-17   |
|                       |                 |                     |                          |                     | >ref NP_173224.2  unknown protein [Arabidopsis thaliana]gb AAQ56797.1  At1g17820 [Arabidopsis thaliana] gb AAM91570.1  unknown protein [Arabidopsis thaliana]                                                                                                                                                                                                               | 803   | 5E-17   |
|                       |                 |                     |                          |                     | >gb AAF97262.1  Strong similarity to a hypothetical protein T18K17.13 gi 6598861 from Arabidopsis thaliana BAC T18K17 gb AC010556 and contains a PH PF 00169 domain                                                                                                                                                                                                         | 797   | 5E-17   |
|                       |                 |                     |                          |                     | >ref NP_177463.1  unknown protein [Arabidopsis thaliana]gb AAG52130.1  hypothetical protein; 41134-44253 [Arabidopsis thaliana]                                                                                                                                                                                                                                             | 779   | 2E-13   |
| BM075951              | 2.12E-02        | Mo17<B73=F1         | 1.86                     | 10                  | ns                                                                                                                                                                                                                                                                                                                                                                          |       |         |
|                       |                 |                     |                          |                     | >ref NP_908924.1  P0463A02.21 [Oryza sativa (japonica cultivar-group)]dbj BAB89617.1  beta-glucosidase aggregating factor precursor-like protein [Oryza sativa (japonica cultivar-group)]                                                                                                                                                                                   | 150   | 6E-21   |
| DV621517              | 2.13E-02        | B73<F1              | 1.63                     | 1                   | >dbj BAD53304.1  putative beta-glucosidase aggregating factor [Oryza sativa(japonica cultivar-group)]                                                                                                                                                                                                                                                                       | 169   | 1E-19   |
|                       |                 |                     |                          |                     | >ref NP_920772.1  putative disease resistance protein [Oryza sativa (japonica cultivar-group)] gb AAM74358.1  Putative disease resistance response protein [Oryza sativa (japonica cultivar-group)] gb AAP53059.1  hypothetical protein LOC_Os10g18760 [Oryza sativa (japonica cultivar-group)]                                                                             | 175   | 8E-18   |
|                       |                 |                     |                          |                     | >gb AAV50047.1  dirigent-like protein [Saccharum hybrid cultivar]                                                                                                                                                                                                                                                                                                           | 187   | 1E-17   |
|                       |                 |                     |                          |                     | >gb ABA96667.1  jacalin homolog [Oryza sativa (japonica cultivar-group)]                                                                                                                                                                                                                                                                                                    | 307   | 2E-17   |
| CB815586              | 2.13E-02        | Mo17<F1             | 1.29                     | 11                  | >ref XP_467233.1  unknown protein [Oryza sativa (japonica cultivar-group)]dbj BAD07680.1  unknown protein [Oryza sativa (japonica cultivar-group)]                                                                                                                                                                                                                          | 84    | 1E-15   |

**Table 4. Microarray analysis results, mode of gene action classification, and BLAST annotation for the 1,367 ESTs identified as differentially expressed among genotypes (15% FDR)**

| GenBank accession no. | Overall P value | Significant pattern | Fold change <sup>†</sup> | Sector <sup>‡</sup> | BLAST annotation*                                                                                                                                                                                                                                                                                                                                                                                                                                                                                                                                                                                                                                                                                                                                                                                                                                                                                                                                                                                                   | Score                           | E value                                   |
|-----------------------|-----------------|---------------------|--------------------------|---------------------|---------------------------------------------------------------------------------------------------------------------------------------------------------------------------------------------------------------------------------------------------------------------------------------------------------------------------------------------------------------------------------------------------------------------------------------------------------------------------------------------------------------------------------------------------------------------------------------------------------------------------------------------------------------------------------------------------------------------------------------------------------------------------------------------------------------------------------------------------------------------------------------------------------------------------------------------------------------------------------------------------------------------|---------------------------------|-------------------------------------------|
|                       |                 |                     |                          |                     | >ref XP_473709.1  OSJNBa0086O06.9 [Oryza sativa (japonica cultivar-group)]emb CAE04861.2  OSJNBa0086O06.9 [Oryza sativa (japonica cultivar-group)]                                                                                                                                                                                                                                                                                                                                                                                                                                                                                                                                                                                                                                                                                                                                                                                                                                                                  | 83                              | 1E-14                                     |
| BM079979              | 2.13E-02        | B73=F1<Mo17         | 1.42                     | 4                   | ns                                                                                                                                                                                                                                                                                                                                                                                                                                                                                                                                                                                                                                                                                                                                                                                                                                                                                                                                                                                                                  |                                 |                                           |
| CD568430              | 2.13E-02        | B73<Mo17            | 1.26                     | 3                   | >ref XP_493706.1  arginine decarboxylase [Oryza sativa (japonica cultivar-group)]gb AAT37534.1  arginine decarboxylase [Oryza sativa] dbj BAA84799.1  arginine decarboxylase [Oryza sativa (japonica cultivar-group)] sp Q9SNN0 SPE1 ORYSA Arginine decarboxylase (ARGDC) (ADC)<br>>emb CAA65585.1  arginine decarboxylase [Vitis vinifera]<br>>dbj BAE71301.1  putative arginine decarboxylase [Trifolium pratense]<br>>dbj BAE71251.1  putative arginine decarboxylase [Trifolium pratense]<br>>dbj BAE71214.1  putative arginine decarboxylase [Trifolium pratense]                                                                                                                                                                                                                                                                                                                                                                                                                                              | 702<br>630<br>729<br>729<br>280 | 4E-47<br>1E-29<br>2E-29<br>2E-29<br>2E-29 |
| DV622013              | 2.13E-02        | B73<Mo17            | 1.48                     | 4                   | >gb AAP80862.1  Emr1 [Triticum aestivum]<br>>gb ABA96655.1  Emr1 [Oryza sativa (japonica cultivar-group)]<br>>gb ABA96656.1  Emr1 [Oryza sativa (japonica cultivar-group)]                                                                                                                                                                                                                                                                                                                                                                                                                                                                                                                                                                                                                                                                                                                                                                                                                                          | 304<br>609<br>682               | 5E-20<br>2E-17<br>2E-12                   |
| CB334161              | 2.14E-02        | Mo17<B73=F1         | 1.28                     | 10                  | >dbj BAD31463.1  putative zinc finger (C3HC4-type RING finger) protein [Oryza sativa(japonica cultivar-group)]                                                                                                                                                                                                                                                                                                                                                                                                                                                                                                                                                                                                                                                                                                                                                                                                                                                                                                      | 570                             | 3E-11                                     |
| CB605131              | 2.14E-02        | Mo17<F1             | 1.25                     | 11                  | >ref XP_468756.1  putative ribosomal protein S19 [Oryza sativa (japonica cultivar-group)] ref XP_468752.1  putative ribosomal protein S19 [Oryza sativa (japonica cultivar-group)] gb AAP20855.1  putative ribosomal protein S19 [Oryza sativa (japonica cultivar-group)] gb AAP20842.1  putative ribosomal protein S19 [Oryza sativa (japonica cultivar-group)] sp P40978 RS19 ORYSA 40S ribosomal protein S19<br>>gb AAW34237.1  putative ribosomal protein S19 [Oryza sativa (japonica cultivar-group)]<br>>gb AAW34236.1  putative ribosomal protein S19 [Oryza sativa (japonica cultivar-group)]<br>>gb AAW34240.1  putative ribosomal protein S19 [Oryza sativa (japonica cultivar-group)]<br>>gb ABB87116.1  40S ribosomal protein S19-like [Solanum tuberosum]                                                                                                                                                                                                                                              | 146<br>144<br>166<br>122<br>143 | 7E-74<br>4E-71<br>3E-70<br>2E-63<br>5E-61 |
| CB605478              | 2.15E-02        | Mo17<B73            | 1.3                      | 10                  | >ref XP_472755.1  OSJNBa0072F16.12 [Oryza sativa (japonica cultivar-group)]emb CAD40987.2  OSJNBa0072F16.12 [Oryza sativa (japonica cultivar-group)]<br>>emb CAA10984.1  hypothetical protein [Hordeum vulgare subsp. vulgare]sp O48609 RRP3_HORVU Plastid-specific 30S ribosomal protein 3, chloroplast precursor (PSRP-3)<br>>gb AAF64163.1  plastid-specific ribosomal protein 3 precursor [Spinacia oleracea]sp P82412 RRP3_SPIOL Plastid-specific 30S ribosomal protein 3, chloroplast precursor (PSRP-3)<br>>ref NP_564934.1  structural constituent of ribosome [Arabidopsis thaliana]gb AAO50623.1  unknown protein [Arabidopsis thaliana] gb AAO42029.1  unknown protein [Arabidopsis thaliana] gb AAD49984.1  ESTs gb H37416, gb T21163, gb T76138 and gb AA651329 come from this gene. [Arabidopsis thaliana] sp Q9SX22 RRP31 ARATH Plastid-specific 30S ribosomal protein 3-1, chloroplast precursor (PSRP-3 1)<br>>gb AAM63350.1  plastid-specific ribosomal protein 3 precursor [Arabidopsisthaliana] | 183<br>181<br>179<br>166<br>166 | 3E-43<br>5E-39<br>2E-28<br>1E-25<br>1E-25 |
| DV491655              | 2.16E-02        | F1<Mo17             | 2.99                     | 5                   | ns                                                                                                                                                                                                                                                                                                                                                                                                                                                                                                                                                                                                                                                                                                                                                                                                                                                                                                                                                                                                                  |                                 |                                           |
| DV490951              | 2.16E-02        | F1=Mo17<B73         | 1.31                     | 9                   | >dbj BAD31081.1  unknown protein [Oryza sativa (japonica cultivar-group)]<br>>ref NP_172707.1  unknown protein [Arabidopsis thaliana]gb AAQ62869.1  At1g12450 [Arabidopsis thaliana] dbj BAD93843.1  hypothetical protein [Arabidopsis thaliana]<br>>emb CAB79240.1  predicted protein [Arabidopsis thaliana]emb CAA19800.1  putative protein [Arabidopsis thaliana] emb CAA16570.1  predicted protein [Arabidopsis thaliana]<br>>ref NP_194016.2  unknown protein [Arabidopsis thaliana]gb AAO50499.1  unknown protein [Arabidopsis thaliana] gb AAO42138.1  unknown protein [Arabidopsis thaliana]<br><br>>ref NP_565283.1  unknown protein [Arabidopsis thaliana]gb AAN28822.1  At2g02370/T16F16.16 [Arabidopsis thaliana] gb AAL15376.1  At2g02370/T16F16.16 [Arabidopsis thaliana] gb AAC78519.2  expressed protein [Arabidopsis thaliana] gb AAK32779.1  At2g02370/T16F16.16 [Arabidopsis thaliana]                                                                                                           | 288<br>303<br>217<br>296<br>320 | 7E-53<br>1E-27<br>1E-26<br>1E-26<br>3E-24 |
| BM333812              | 2.16E-02        | Mo17<B73=F1         | 1.51                     | 10                  | >ref NP_917674.1  putative acetyl transferase [Oryza sativa (japonica cultivar-group)] dbj BAB17110.1  taxadienol acetyl transferase-like [Oryza sativa (japonica cultivar-group)]<br>>ref NP_917673.1  putative acetyl transferase [Oryza sativa (japonica cultivar-group)] dbj BAB17109.1  10-deacetylbaicatin III-10-O-acetyl transferase-like [Oryza sativa (japonica cultivar-group)]<br>>gb AAL73122.1  putative 0-deacetylbaicatin III-10-O-acetyl transferase-likeprotein [Musa acuminata]<br>>dbj BAD86875.1  3'-N-debenzoyltaxol N-benzoyltransferase -like [Oryza sativa(japonica cultivar-group)]<br>>ref NP_908495.1  unnamed protein product [Oryza sativa (japonica cultivar-group)]                                                                                                                                                                                                                                                                                                                 | 424<br>446<br>272<br>439<br>153 | 1E-45<br>1E-33<br>1E-11<br>2E-10<br>2E-10 |
| DV942810              | 2.16E-02        | B73=F1<Mo17         | 1.37                     | 5                   | >ref XP_473409.1  OSJNBa0079A21.20 [Oryza sativa (japonica cultivar-group)]<br>>emb CAE02020.1  OSJNBa0079A21.22 [Oryza sativa (japonica cultivar-group)]<br>>ref NP_199542.1  unknown protein [Arabidopsis thaliana]gb AAO64931.1  At5g47310 [Arabidopsis thaliana] dbj BAA97165.1  unnamed protein product [Arabidopsis thaliana]<br>>emb CAI64488.1  OSJNBa0065H10.7 [Oryza sativa (japonica cultivar-group)]<br>>ref XP_467112.1  EREBP-4 like protein [Oryza sativa (japonica cultivar-group)]dbj BAD25328.1  EREBP-4 like protein [Oryza sativa (japonica cultivar-group)]<br>dbj BAD25669.1  EREBP-4 like protein [Oryza sativa (japonica cultivar-group)]                                                                                                                                                                                                                                                                                                                                                   | 207<br>192<br>245<br>158<br>204 | 1E-15<br>1E-15<br>2E-12<br>6E-11<br>6E-11 |

**Table 4. Microarray analysis results, mode of gene action classification, and BLAST annotation for the 1,367 ESTs identified as differentially expressed among genotypes (15% FDR)**

| GenBank accession no. | Overall P value | Significant pattern | Fold change <sup>†</sup> | Sector <sup>‡</sup> | BLAST annotation*                                                                                                                                                                                                                                                                                                                                                                                                                                                                                                                                                                                                                                                                                                                                                                                                                                                                                                                                                                                                                                                                                                                                                               | Score                                  | E value                                            |
|-----------------------|-----------------|---------------------|--------------------------|---------------------|---------------------------------------------------------------------------------------------------------------------------------------------------------------------------------------------------------------------------------------------------------------------------------------------------------------------------------------------------------------------------------------------------------------------------------------------------------------------------------------------------------------------------------------------------------------------------------------------------------------------------------------------------------------------------------------------------------------------------------------------------------------------------------------------------------------------------------------------------------------------------------------------------------------------------------------------------------------------------------------------------------------------------------------------------------------------------------------------------------------------------------------------------------------------------------|----------------------------------------|----------------------------------------------------|
| DV622487              | 2.16E-02        | Mo17<B73            | 1.29                     | 10                  | >dbj BAD68235.1  putative CGI-94 protein [Oryza sativa (japonica cultivar-group)] dbj BAD68234.1  putative CGI-94 protein [Oryza sativa (japonica cultivar-group)] sp Q8S1Z1 UTP11 ORYSA Probable U3 small nucleolar RNA-associated protein 11 (U3 snoRNA-associated protein 11)<br>>ref NP_915921.1 P0468B07.17 [Oryza sativa (japonica cultivar-group)]<br>>ref NP_191595.1  unknown protein [Arabidopsis thaliana] emb CAB81822.1  putative protein [Arabidopsis thaliana] gb AAN31867.1  unknown protein [Arabidopsis thaliana] gb AAM26635.1  AT3g60360/T8B10_20 [Arabidopsis thaliana] gb AAK63980.1  AT3g60360/T8B10_20 [Arabidopsis thaliana] gb AAM61709.1  unknown [Arabidopsis thaliana] pir T47847 hypothetical protein T8B10.20 - Arabidopsis thaliana sp Q9M223 UT11_ARATH Probable U3 small nucleolar RNA-associated protein 11 (U3 snoRNA-associated protein 11)<br>>ref XP_788181.1  PREDICTED: similar to UTP11-like, U3 small nucleolar ribonucleoprotein, [Strongylocentrotus purpuratus]<br>>gb AAH49053.1  UTP11-like, U3 small nucleolar ribonucleoprotein [Danio rerio] ref NP_956292.1  UTP11-like, U3 small nucleolar ribonucleoprotein [Danio rerio] | 229<br>214<br>228<br>250<br>250        | 3E-62<br>7E-50<br>2E-34<br>2E-11<br>6E-11          |
| CB885743              | 2.18E-02        | B73=F1<Mo17         | 1.64                     | 4                   | ns                                                                                                                                                                                                                                                                                                                                                                                                                                                                                                                                                                                                                                                                                                                                                                                                                                                                                                                                                                                                                                                                                                                                                                              |                                        |                                                    |
| CD527560              | 2.18E-02        | B73<Mo17            | 1.47                     | 3                   | >pir J S0657 ubiquitin / ribosomal protein S27a - maize gb AAA70105.1  ubiquitin fusion protein gb AAA33519.1  ubiquitin fusion protein prf 2211240B ubiquitin fusion protein<br>>ref XP_475630.1  putative ubiquitin / ribosomal protein S27a [Oryza sativa (japonica cultivar-group)] gb AAV43924.1  putative ubiquitin fusion protein [Oryza sativa (japonica cultivar-group)] gb AAT93912.1  putative ubiquitin extension protein [Oryza sativa (japonica cultivar-group)]<br>>gb AAA62698.1  ubiquitin<br>>ref NP_908721.1  ubiquitin / ribosomal protein S27a [Oryza sativa (japonica cultivar-group)] dbj BAB39294.1  ubiquitin / ribosomal protein S27a.1 [Oryza sativa (japonica cultivar-group)]<br>>gb AAA62699.1  ubiquitin                                                                                                                                                                                                                                                                                                                                                                                                                                         | 155<br>155<br>155<br>155<br>155        | 3E-69<br>7E-68<br>7E-68<br>9E-68<br>1E-67          |
| CD527180              | 2.18E-02        | Mo17<B73=F1         | 1.21                     | 11                  | >ref XP_469336.1  unknown protein [Oryza sativa] dbj BAC78563.1  hypothetical protein [Oryza sativa (japonica cultivar-group)] gb AAK14411.1  unknown protein [Oryza sativa]<br>>ref NP_201245.1  unknown protein [Arabidopsis thaliana] gb AAL34219.1  unknown protein [Arabidopsis thaliana] gb AAK59405.1  unknown protein [Arabidopsis thaliana] dbj BAB09871.1  unnamed protein product [Arabidopsis thaliana]<br>>ref NP_196519.1  unknown protein [Arabidopsis thaliana] gb AAO39889.1  At5g09570 [Arabidopsis thaliana] dbj BAC43288.1  unknown protein [Arabidopsis thaliana] emb CAB89373.1  putative protein [Arabidopsis thaliana]<br>>gb AAS21010.1  unknown [Hyacinthus orientalis]<br>>ref NP_001032137.1  unknown protein [Arabidopsis thaliana]<br>>ref NP_912581.1  Putative abscisic acid-induced protein - rice [Oryza sativa (japonica cultivar-group)] gb AAN05334.1  Putative abscisic acid-induced protein - rice [Oryza sativa (japonica cultivar-group)]                                                                                                                                                                                              | 138<br>144<br>139<br>150<br>162        | 1E-29<br>4E-26<br>8E-21<br>5E-19<br>2E-12          |
| DV489806              | 2.18E-02        | B73<Mo17            | 1.79                     | 3                   | >gb AAQ74238.1  caleosin 1 [Hordeum vulgare] gb AAQ74237.1  caleosin 1 [Hordeum vulgare]<br>>gb AAF13743.1  caleosin [Sesamum indicum]<br>>ref XP_473143.1  OSJNBa0004N05.7 [Oryza sativa (japonica cultivar-group)] emb CAE03383.1  OSJNBa0004N05.7 [Oryza sativa (japonica cultivar-group)] emb CAA61981.1  EFA27 for EF hand, abscisic acid, 27kD [Oryza sativa]<br>>gb AAB71227.1  Ca <sup>2+</sup> -binding EF hand protein [Glycine max]                                                                                                                                                                                                                                                                                                                                                                                                                                                                                                                                                                                                                                                                                                                                  | 271<br>301<br>245<br>244<br>239        | 8E-59<br>5E-33<br>5E-33<br>1E-32<br>1E-32          |
| DV491909              | 2.18E-02        | B73<F1=Mo17         | 1.32                     | 3                   | >sp P49036 SUS2_MAIZE Sucrose synthase 2 (Sucrose-UDP glucosyltransferase 2) gb AAA33515.1  sucrose synthase 2 gb AAA33514.1  UDP-glucose:D-fructose 2-glucosyl-transferase<br>>gb AAV64256.2  sucrose synthase [Bambusa oldhamii]<br>>gb AAA68209.1  sus1 gene product<br>>gb AAK52129.1  sucrose-UDP glucosyltransferase 2 [Oryza sativa (japonica cultivar-group)] ref NP_909830.1  sucrose-UDP glucosyltransferase 2 [Oryza sativa] emb CAA41774.1  sucrose-UDP glucosyltransferase (isoenzyme 2) [Oryza sativa (japonica cultivar-group)] sp P31924 SUS2_ORYSA Sucrose synthase 2 (Sucrose-UDP glucosyltransferase 2) prf 2207194A sucrose synthase:ISOTYPE=2<br>>gb AAL50570.1  sucrose synthase [Bambusa oldhamii]                                                                                                                                                                                                                                                                                                                                                                                                                                                       | 816<br>816<br>816<br>816<br>816<br>816 | 1E-21<br>2E-21<br>2E-21<br>2E-21<br>2E-21<br>1E-20 |
| DV621209              | 2.18E-02        | B73<F1=Mo17         | 1.3                      | 3                   | ns                                                                                                                                                                                                                                                                                                                                                                                                                                                                                                                                                                                                                                                                                                                                                                                                                                                                                                                                                                                                                                                                                                                                                                              |                                        |                                                    |
| DV494735              | 2.19E-02        | F1=Mo17<B73         | 1.37                     | 9                   | >gb ABA94601.1  ribosomal protein S4 [Oryza sativa (japonica cultivar-group)] gb ABA94599.1  ribosomal protein S4 [Oryza sativa (japonica cultivar-group)]<br>>ref NP_198801.1  structural constituent of ribosome [Arabidopsis thaliana] gb AAM65655.1  40S ribosomal protein S9-like [Arabidopsis thaliana] dbj BAB10209.1  40S ribosomal protein S9 [Arabidopsis thaliana]<br>>emb CAG47084.1  40S ribosomal protein S9 [Catharanthus roseus]<br>>gb AAU93594.1  putative ribosomal protein [Solanum demissum]<br>>gb ABA46767.1  unknown [Solanum tuberosum]                                                                                                                                                                                                                                                                                                                                                                                                                                                                                                                                                                                                                | 195<br>197<br>197<br>197<br>197        | 7E-80<br>2E-78<br>3E-78<br>5E-78<br>5E-78          |
| DV620995              | 2.19E-02        | B73<F1=Mo17         | 1.23                     | 3                   | >ref NP_922172.1  putative microtubule-associated protein [Oryza sativa (japonica cultivar-group)] gb AAM93680.1  putative microtubule-associated protein [Oryza sativa (japonica cultivar-group)] gb AAP54459.1  microtubule-associated protein, putative [Oryza sativa (japonica cultivar-group)]<br>>ref NP_201528.1  ATEB1C (MICROTUBULE END BINDING PROTEIN 1); microtubule binding [Arabidopsis thaliana] gb AAM65311.1  microtubule-associated protein EB1-like protein [Arabidopsis thaliana] dbj BAD43258.1  unknown protein [Arabidopsis thaliana] dbj BAB09646.1  unnamed protein product [Arabidopsis thaliana]                                                                                                                                                                                                                                                                                                                                                                                                                                                                                                                                                     | 332<br>329                             | 9E-67<br>4E-31                                     |

**Table 4. Microarray analysis results, mode of gene action classification, and BLAST annotation for the 1,367 ESTs identified as differentially expressed among genotypes (15% FDR)**

| GenBank accession no. | Overall P value | Significant pattern | Fold change <sup>†</sup> | Sector <sup>‡</sup> | BLAST annotation*                                                                                                                                                                                                                                                                                                                                                  | Score | E value |
|-----------------------|-----------------|---------------------|--------------------------|---------------------|--------------------------------------------------------------------------------------------------------------------------------------------------------------------------------------------------------------------------------------------------------------------------------------------------------------------------------------------------------------------|-------|---------|
|                       |                 |                     |                          |                     | >ref NP_201056.1  ATEB1B; microtubule binding [Arabidopsis thaliana]gb AAM61163.1  microtubule-associated protein EB1-like protein [Arabidopsis thaliana]                                                                                                                                                                                                          | 293   | 8E-14   |
|                       |                 |                     |                          |                     | dbj BAB11500.1  microtubule-associated protein EB1-like protein [Arabidopsis thaliana]                                                                                                                                                                                                                                                                             |       |         |
|                       |                 |                     |                          |                     | >ref XP_474072.1  OSJNBb0079B02.14 [Oryza sativa (japonica cultivar-group)]emb CAE05968.2  OSJNBa0063C18.9 [Oryza sativa (japonica cultivar-group)]                                                                                                                                                                                                                | 269   | 4E-13   |
|                       |                 |                     |                          |                     | emb CAD41855.2  OSJNBb0079B02.14 [Oryza sativa (japonica cultivar-group)]                                                                                                                                                                                                                                                                                          |       |         |
|                       |                 |                     |                          |                     | >ref NP_190353.3  ATEB1A; microtubule binding [Arabidopsis thaliana]gb AAP88341.1  At3g47690 [Arabidopsis thaliana]                                                                                                                                                                                                                                                | 276   | 5E-13   |
| DV490948              | 2.20E-02        | Mo17<B73            | 5.58                     | 9                   | ns                                                                                                                                                                                                                                                                                                                                                                 |       |         |
| BM381413              | 2.20E-02        | Mo17<B73=F1         | 1.31                     | 10                  | >gb ABA96024.1  photosystem i reaction centre subunit n, chloroplast precursor [Oryza sativa (japonica cultivar-group)]                                                                                                                                                                                                                                            | 149   | 2E-45   |
|                       |                 |                     |                          |                     | >gb AAC26197.1  photosystem I complex PsaN subunit precursor [Zea mays]sp P49107 PSAN_MAIZE Photosystem I reaction centre subunit N, chloroplast precursor (PSI-N)                                                                                                                                                                                                 | 112   | 4E-45   |
|                       |                 |                     |                          |                     | >emb CAA47056.1  photosystem I subunit N [Hordeum vulgare subsp. vulgare]sp P31093 PSAN_HORVU Photosystem I reaction centre subunit N, chloroplast precursor (PSI-N)                                                                                                                                                                                               | 145   | 6E-44   |
|                       |                 |                     |                          |                     | >gb AAO49652.1  photosystem I-N subunit [Phaseolus vulgaris]                                                                                                                                                                                                                                                                                                       | 170   | 5E-41   |
|                       |                 |                     |                          |                     | >ref NP_201209.1  PSI-N; calmodulin binding [Arabidopsis thaliana]gb AAM10156.1  photosystem I reaction center subunit psaN precursor [Arabidopsis thaliana]                                                                                                                                                                                                       |       |         |
|                       |                 |                     |                          |                     | gb AAL32913.1  photosystem I reaction centre subunit psaN precursor [Arabidopsis thaliana] dbj BAB10272.1  photosystem I reaction centre subunit psaN precursor [Arabidopsis thaliana] gb AAA93075.1  PSI-N sp P49107 PSAN_ARATH Photosystem I reaction centre subunit N, chloroplast precursor (PSI-N)                                                            | 171   | 2E-39   |
| CD001387              | 2.21E-02        | B73<Mo17            | 1.18                     | 3                   | >gb AAB33304.1  GF14-6 [Zea mays]sp P49106 14331 MAIZE 14-3-3-like protein GF14-6                                                                                                                                                                                                                                                                                  | 261   | e-103   |
|                       |                 |                     |                          |                     | >gb AAB33305.1  GF14-12=GRF2 product/14-3-3 protein homolog [Zea mays, XL80,Peptide, 261 aa] sp Q01526 14332 MAIZE 14-3-3-like protein GF14-12                                                                                                                                                                                                                     | 261   | e-102   |
|                       |                 |                     |                          |                     | >ref XP_472763.1  OSJNBa0072F16.20 [Oryza sativa (japonica cultivar-group)]emb CAE76003.1  B1358B12.12 [Oryza sativa (japonica cultivar-group)]                                                                                                                                                                                                                    |       |         |
|                       |                 |                     |                          |                     | emb CAE01538.2  OSJNBa0072F16.20 [Oryza sativa (japonica cultivar-group)] gb AAB07456.1  GF14-b protein                                                                                                                                                                                                                                                            | 262   | e-100   |
|                       |                 |                     |                          |                     | >emb CAA74592.1  14-3-3 protein [Hordeum vulgare]                                                                                                                                                                                                                                                                                                                  | 263   | 1E-98   |
|                       |                 |                     |                          |                     | >emb CAB77673.1  14-3-3-like protein [Oryza sativa]dbj BAD29578.1  putative GF14-b protein [Oryza sativa (japonica cultivar-group)] dbj BAD27625.1  putative GF14-b protein [Oryza sativa (japonica cultivar-group)]                                                                                                                                               | 262   | 8E-98   |
| BM268021              | 2.21E-02        | F1<Mo17             | 1.75                     | 5                   | >ref XP_469591.1  expressed protein [Oryza sativa (japonica cultivar-group)]gb AAR01643.1  expressed protein [Oryza sativa (japonica cultivar-group)]                                                                                                                                                                                                              | 95    | 1E-36   |
|                       |                 |                     |                          |                     | >ref XP_480594.1  hypothetical protein [Oryza sativa (japonica cultivar-group)]dbj BAD05323.1  hypothetical protein [Oryza sativa (japonica cultivar-group)]                                                                                                                                                                                                       | 128   | 7E-36   |
|                       |                 |                     |                          |                     | >gb AAM62578.1  unknown [Arabidopsis thaliana]                                                                                                                                                                                                                                                                                                                     | 86    | 9E-28   |
|                       |                 |                     |                          |                     | >ref NP_568055.1  unknown protein [Arabidopsis thaliana]                                                                                                                                                                                                                                                                                                           | 86    | 3E-27   |
|                       |                 |                     |                          |                     | >ref NP_187208.1  unknown protein [Arabidopsis thaliana]gb AAR92313.1  At3g05570 [Arabidopsis thaliana] gb AAF26140.1  unknown protein [Arabidopsis thaliana] gb AAR24155.1  At3g05570 [Arabidopsis thaliana]                                                                                                                                                      | 90    | 3E-25   |
| CD001528              | 2.22E-02        | Mo17<B73            | 1.36                     | 10                  | ns                                                                                                                                                                                                                                                                                                                                                                 |       |         |
| DV550252              | 2.22E-02        | B73<F1=Mo17         | 1.38                     | 3                   | >gb AAT12488.1  copper chaperone [Populus alba x Populus tremula var. glandulosa]                                                                                                                                                                                                                                                                                  | 85    | 1E-31   |
|                       |                 |                     |                          |                     | >ref NP_564870.1  metal ion binding [Arabidopsis thaliana]gb AAL76156.1  At1g66240/T6J19_6 [Arabidopsis thaliana] gb AAK64002.1  At1g66240/T6J19_6 [Arabidopsis thaliana]                                                                                                                                                                                          | 106   | 2E-30   |
|                       |                 |                     |                          |                     | >ref XP_480605.1  putative copper chaperone [Oryza sativa (japonica cultivar-group)]dbj BAD11546.1  putative copper chaperone [Oryza sativa (japonica cultivar-group)] dbj BAD05334.1  putative copper chaperone [Oryza sativa (japonica cultivar-group)]                                                                                                          | 81    | 2E-30   |
|                       |                 |                     |                          |                     | >gb AAP06757.1  copper chaperone [Lycopersicon esculentum]                                                                                                                                                                                                                                                                                                         | 81    | 2E-28   |
|                       |                 |                     |                          |                     | >ref NP_191183.1  CCH [Arabidopsis thaliana]emb CAB87423.1  copper homeostasis factor [Arabidopsis thaliana] gb AAK32872.1  AT3g56240/F18O21_200 [Arabidopsis thaliana] gb AAL47423.1  AT3g56240/F18O21_200 [Arabidopsis thaliana] gb AAM62878.1  copper homeostasis factor [Arabidopsis thaliana] gb AAC33510.1  copper homeostasis factor [Arabidopsis thaliana] | 121   | 4E-28   |
| CB886447              | 2.22E-02        | Mo17<B73=F1         | 1.23                     | 10                  | >ref NP_567948.1  EMB2758 [Arabidopsis thaliana]                                                                                                                                                                                                                                                                                                                   | 823   | 2E-8    |
|                       |                 |                     |                          |                     | >ref NP_189042.1  unknown protein [Arabidopsis thaliana]dbj BAB03018.1  unnamed protein product [Arabidopsis thaliana]                                                                                                                                                                                                                                             | 633   | 3E-8    |
|                       |                 |                     |                          |                     | >ref NP_176062.1  unknown protein [Arabidopsis thaliana]gb AAG09095.1  Hypothetical protein [Arabidopsis thaliana]                                                                                                                                                                                                                                                 | 704   | 4E-8    |
|                       |                 |                     |                          |                     | >emb CAJ26357.1  Selenium binding protein [Brachypodium sylvaticum]                                                                                                                                                                                                                                                                                                | 624   | 6E-8    |
|                       |                 |                     |                          |                     | >ref NP_172412.1  unknown protein [Arabidopsis thaliana]gb AAC33201.1  Hypothetical protein [Arabidopsis thaliana]                                                                                                                                                                                                                                                 | 705   | 8E-8    |
| BM338596              | 2.24E-02        | Mo17<B73=F1         | 2.5                      | 11                  | >dbj BAD73827.1  unknown protein [Oryza sativa (japonica cultivar-group)]                                                                                                                                                                                                                                                                                          | 152   | 1E-15   |
|                       |                 |                     |                          |                     | >dbj BAD29318.1  unknown protein [Oryza sativa (japonica cultivar-group)]                                                                                                                                                                                                                                                                                          | 236   | 1E-15   |
| CB886181              | 2.24E-02        | Mo17<B73            | 1.29                     | 9                   | >dbj BAA28170.1  phosphoenolpyruvate carboxylase [Zea mays]                                                                                                                                                                                                                                                                                                        | 960   | 4E-59   |
|                       |                 |                     |                          |                     | >emb CAA446267.1  phosphoenolpyruvate carboxylase [Sorghum bicolor]emb CAA39197.1  phosphoenolpyruvate carboxylase [Sorghum bicolor] sp P29195 CAPP1_SORBI Phosphoenolpyruvate carboxylase 1 (PEPCase 1) (PEPC 1) (CP21)                                                                                                                                           | 960   | 3E-58   |
|                       |                 |                     |                          |                     | >gb AAR84575.1  C3 phosphoenolpyruvate carboxylase [Setaria italica]                                                                                                                                                                                                                                                                                               | 961   | 5E-57   |
|                       |                 |                     |                          |                     | >gb AAP06951.1  phosphoenolpyruvate carboxylase [Echinochloa crus-galli]                                                                                                                                                                                                                                                                                           | 961   | 3E-56   |
|                       |                 |                     |                          |                     | >dbj BAD27732.1  putative phosphoenolpyruvate carboxylase [Oryza sativa (japonica cultivar-group)]                                                                                                                                                                                                                                                                 | 968   | 1E-54   |
| CD568937              | 2.25E-02        | Mo17<F1             | 1.24                     | 12                  | >gb AAM95942.1  nucleosome/chromatin assembly factor group D protein [Zea mays]emb CAA41220.1  high mobility group protein [Zea mays] emb CAB46752.1  HMGA protein [Zea mays] sp P27347 MNB1B MAIZE DNA-binding protein MNB1B (HMG1-like protein)                                                                                                                  | 157   | 3E-22   |

**Table 4. Microarray analysis results, mode of gene action classification, and BLAST annotation for the 1,367 ESTs identified as differentially expressed among genotypes (15% FDR)**

| GenBank accession no. | Overall P value | Significant pattern | Fold change <sup>‡</sup> | Sector <sup>‡</sup> | BLAST annotation*                                                                                                                                                                                                                                                                                                                                                           | Score | E value |
|-----------------------|-----------------|---------------------|--------------------------|---------------------|-----------------------------------------------------------------------------------------------------------------------------------------------------------------------------------------------------------------------------------------------------------------------------------------------------------------------------------------------------------------------------|-------|---------|
|                       |                 |                     |                          |                     | >emb/CAA46876.1  DNA-binding protein [Zea mays]pir  T03640 high mobility group protein MNB1b - maize (fragment)                                                                                                                                                                                                                                                             | 168   | 3E-22   |
|                       |                 |                     |                          |                     | >gb/AAP21609.1  HMGB1 [Oryza sativa (indica cultivar-group)]gb AAN28722.1  HMG1 protein [Oryza sativa (indica cultivar-group)] dbj BAD61823.1  HMGB1 [Oryza sativa (japonica cultivar-group)] gb AAC78104.1  high mobility group protein [Oryza sativa]                                                                                                                     | 157   | 7E-21   |
|                       |                 |                     |                          |                     | >emb/CAA77641.1  high mobility group protein [Triticum aestivum]sp P40621 HMGL WHEAT HMG1/2-like protein                                                                                                                                                                                                                                                                    | 161   | 3E-20   |
|                       |                 |                     |                          |                     | >emb/CAA90679.1  HMG1/2-like protein [Hordeum vulgare subsp. vulgare]                                                                                                                                                                                                                                                                                                       | 160   | 2E-19   |
| CB381532              | 2.25E-02        | Mo17<B73=F1         | 1.31                     | 11                  | >ref XP_468159.1  putative ribosomal protein L35A [Oryza sativa (japonica cultivar-group)] ref XP_507015.1  PREDICTED OJ1715_H01.42 gene product [Oryza sativa (japonica cultivar-group)] dbj BAD19312.1  putative ribosomal protein L35A [Oryza sativa (japonica cultivar-group)] dbj BAD19202.1  putative ribosomal protein L35A [Oryza sativa (japonica cultivar-group)] | 112   | 2E-18   |
|                       |                 |                     |                          |                     | >gb AAL59231.1  ribosomal protein L35A [Zea mays]                                                                                                                                                                                                                                                                                                                           | 112   | 8E-18   |
|                       |                 |                     |                          |                     | >gb AAK73115.1  ribosomal protein L35A [Zea mays]                                                                                                                                                                                                                                                                                                                           | 112   | 1E-17   |
|                       |                 |                     |                          |                     | >gb AAK25760.1  ribosomal protein L33 [Castanea sativa]                                                                                                                                                                                                                                                                                                                     | 112   | 2E-16   |
|                       |                 |                     |                          |                     | >ref XP_475896.1  putative ribosomal protein L35A [Oryza sativa (japonica cultivar-group)] ref XP_475888.1  putative ribosomal protein L35A [Oryza sativa (japonica cultivar-group)] gb AAT58712.1  putative ribosomal protein L35A [Oryza sativa (japonica cultivar-group)] gb AAT58704.1  putative ribosomal protein L35A [Oryza sativa (japonica cultivar-group)]        | 111   | 3E-16   |

\*Individual ESTs or the corresponding EST contigs (if available) were screened against a copy of the NCBI nr database downloaded February 2006 by using BLASTX. ns indicates no significant BLAST hits by using an E-value cutoff of e-5.

<sup>‡</sup>Fold changes were calculated between highest- and lowest-expressing genotypes.

<sup>‡</sup>Sector location in Fig. 2.
