# Supplementary material
Source: PubMed Central journal article supplement (PMC1458975)
Supplement: pnas_0510430103_2.pdf [file pnas_0510430103_2.pdf]

**Table 5. Ten genes in the qRT-PCR experiments did not have sufficient statistical power to determine a significant pattern of gene action.**

| GenBank accession no.                                            | BLAST results ( <i>e</i> value)*              | Fold-change <sup>†</sup> | Sector <sup>‡</sup> | Significant pattern <sup>§</sup> | qRT-PCR <i>P</i> value |
|------------------------------------------------------------------|-----------------------------------------------|--------------------------|---------------------|----------------------------------|------------------------|
| <b>No significant differences detected in qRT-PCR experiment</b> |                                               |                          |                     |                                  |                        |
| CB815723                                                         | Putative cystatin (5e-46)                     | 2.99                     | 2                   | B < M ≈ F                        | 0.7942                 |
| DV489577                                                         | Phospholipase-like protein (9e-39)            | 4.56                     | 4                   | F ≈ B < M                        | 0.6929                 |
| DV493407                                                         | Cytochrome <i>c</i> oxidase subunit 2 (3e-26) | 1.97                     | 5                   | F ≈ B < M                        | 0.1122                 |
| BM348600                                                         | ns                                            | 3.87                     | 8                   | F < B                            | 0.1746                 |
| DV489676                                                         | Expressed protein (1e-25)                     | 6.36                     | 10                  | M < B ≈ F                        | 0.098                  |
| CD484517                                                         | H3 histone, family 2 isoform (1e-28)          | 2.35                     | 11                  | M < B ≈ F                        | 0.3528                 |
| DV493472                                                         | Expressed protein (2e-61)                     | 2.27                     | 11                  | M < F                            | 0.4008                 |
| BM351629                                                         | ns                                            | 3.91                     | 7                   | F < B ≈ M                        | 0.6863                 |
| DV489785                                                         | Multidrug resistance protein (6e-19)          | 1.78                     | 7                   | F < B ≈ M                        | 0.3865                 |
| DV493742                                                         | Zein (2e-67)                                  | 4.66                     | 7                   | F < B ≈ M                        | 0.8502                 |

\*Individual ESTs or the corresponding EST contigs (if available) were screened against a copy of the NCBI nr database downloaded Feb 8, 2006 by using Blastx. ns indicates no significant BLAST hits using an *E*-value cutoff of 1e-5.

<sup>†</sup> Fold changes were calculated between highest and lowest expressing genotypes.

<sup>‡</sup> Sector location in Fig. 2.

<sup>§</sup> Significant pattern determined in microarray analysis. ≈ indicates a failure to reject the null hypothesis that the values of the indicated genotypes are identical at  $p < 0.05$ . B, B73; M, Mo17; F, F<sub>1</sub>.
